# Supplementary material
Source: publisher site journal article supplement (https://www.dovepress.com/article/308578)
Supplement: Supplementary file 1 [file get_supplementary_file.php]

Supplementary Table 1

| Cytokine | NCT Number  | Title                                                                                                                                                          | Status     | Conditions                                                                                                                                                              | Interventions                                                                                                                                           | Outcome Measures                                                                                                                                                                                                                                                                                                                                                                                                                                                                                                                                                                                                                                                                                                                                                                                                                                                | Phases          | Enrollment | Start Date | Last Update    |
|----------|-------------|----------------------------------------------------------------------------------------------------------------------------------------------------------------|------------|-------------------------------------------------------------------------------------------------------------------------------------------------------------------------|---------------------------------------------------------------------------------------------------------------------------------------------------------|-----------------------------------------------------------------------------------------------------------------------------------------------------------------------------------------------------------------------------------------------------------------------------------------------------------------------------------------------------------------------------------------------------------------------------------------------------------------------------------------------------------------------------------------------------------------------------------------------------------------------------------------------------------------------------------------------------------------------------------------------------------------------------------------------------------------------------------------------------------------|-----------------|------------|------------|----------------|
| CCL21    | NCT01433172 | Combination Immunotherapy of GM.CD40L Vaccine With CCL21 in Lung Cancer                                                                                        | Completed  | Lung Cancer Adenocarcinoma                                                                                                                                              | Biological: Phase I - GM.CD40L.CCL21 Vaccinations Biological: Phase II - GM.CD40L cells Vaccinations Biological: Phase II - GM.CD40L.CCL21 Vaccinations | Phase I: Recommend Phase II Dose (RPDII) Phase II: Progression Free Survival (PFS) Response Rate                                                                                                                                                                                                                                                                                                                                                                                                                                                                                                                                                                                                                                                                                                                                                                | Phase 1 Phase 2 | 73         | 26-Mar-12  | 6-Aug-19       |
| CCL21    | NCT00798629 | Adenovirus CCL-21 Transduced MART-1/gp100/Tyrosinase/NY-ESO-1 Peptide-Pulsed Dendritic Cells                                                                   | Completed  | Melanoma (Skin)                                                                                                                                                         | Biological: Autologous dendritic cell-adenovirus CCL21 vaccine                                                                                          | Number of Participants with Immune response Number of Participants with Adverse Events                                                                                                                                                                                                                                                                                                                                                                                                                                                                                                                                                                                                                                                                                                                                                                          | Phase 1         | 13         | Nov-08     | 24-Sep-12      |
| CCL21    | NCT00601094 | Vaccine Therapy in Treating Patients With Stage IIIB, Stage IV, or Recurrent Non-Small Cell Lung                                                               | Completed  | Lung Cancer                                                                                                                                                             | Biological: autologous dendritic cell-adenovirus CCL21 vaccine                                                                                          | Maximum tolerated dose Toxicity as measured by NCI Common Toxicity Criteria Disease status at days 28 and 56 Immune response assessment by antigen-specific IFN $\gamma$ ELISPOT assays on days 0, 28, and 56                                                                                                                                                                                                                                                                                                                                                                                                                                                                                                                                                                                                                                                   | Phase 1         | 17         | 26-Feb-09  | April 30, 2018 |
| EPO      | NCT00598507 | Phase II Trial Of ZK-EPO (ZK219477) (Sagopilone) In Metastatic                                                                                                 | Completed  | Melanoma                                                                                                                                                                | Drug: ZK-EPO                                                                                                                                            | Response Rate (RR) Median Progression Free Survival (PFS) Median Overall Survival (OS) Occurrence of Attributable Serious Adverse Events (SAEs)                                                                                                                                                                                                                                                                                                                                                                                                                                                                                                                                                                                                                                                                                                                 | Phase 2         | 35         | May-07     | 11-Dec-13      |
| EPO      | NCT00386152 | A Study Comparing Two Different PROCRIT Doses to a Dose of ARANESP in Anemic Cancer Patients Receiving Chemotherapy                                            | Terminated | Neoplasms Anemia Cancer                                                                                                                                                 | Drug: epoetin alfa Drug: darbepoetin alfa                                                                                                               | Hemoglobin (Hb) Change From Baseline to Study Week 7 Number of Patients Receiving at Least 1 Packed Red Blood Cell (PRBC) Transfusion During Study Time to Achieve Hb $\geq$ 11 g/dL During Study Number of Patients (Hb $\geq$ 11 g/dL) During Study.                                                                                                                                                                                                                                                                                                                                                                                                                                                                                                                                                                                                          | Phase 2         | 235        | Nov-06     | 19-Jul-13      |
| EPO      | NCT00400686 | Epoetin Alfa in Treating Anemia in Patients Undergoing Chemotherapy for Multiple Myeloma                                                                       | Completed  | Anemia Multiple Myeloma Plasma Cell Neoplasm                                                                                                                            | Biological: epoetin alfa                                                                                                                                | Change From Baseline in Hemoglobin at Day 28 Number of Patients With an at Least 1gm/dL Increase in Hgb Number of Patients With an at Least 2gm/dL Increase in Hgb                                                                                                                                                                                                                                                                                                                                                                                                                                                                                                                                                                                                                                                                                              | Not Applicable  | 31         | Sep-03     | 22-Feb-18      |
| EPO      | NCT00258440 | Epoetin Alfa in Treating Patients With Anemia Who Are Undergoing Chemotherapy for Cancer                                                                       | Terminated | Anemia Fatigue Unspecified Adult Solid Tumor, Protocol Specific                                                                                                         | Drug: Weekly procrit dosing Drug: Interval Dosing                                                                                                       | Number of Subjects That Maintained Target Hemoglobin Level (11-12 g/dL) Maintenance Weekly for 12 Weeks Pharmacokinetics (PK) and Pharmacodynamics Assays That Measure Concentration of Erythropoietin in Serum. Quality of Life at Baseline and Weeks 4, 8, 16, 24, and 28 Number of Adverse Events (AEs) Experienced as Measure of Safety                                                                                                                                                                                                                                                                                                                                                                                                                                                                                                                     | Not Applicable  | 7          | May-03     | 9-May-17       |
| EPO      | NCT00338286 | A Study of Epoetin Alfa Plus Standard Supportive Care Versus Standard Supportive Care Only in Anemic Patients With Metastatic Breast Cancer Receiving Standard | Completed  | Breast Cancer Neoplasm Metastasis                                                                                                                                       | Other: Standard supportive care (packed RBC transfusion) Drug: epoetin alfa + packed RBC transfusion                                                    | Progression Free Survival Overall Survival Time to Tumor Progression Overall Response Rate (ORR) Percentage of Participants With Suspected Thrombotic Vascular Events (TVEs)                                                                                                                                                                                                                                                                                                                                                                                                                                                                                                                                                                                                                                                                                    | Phase 3         | 2098       | 2-Mar-06   | 19-Mar-18      |
| EPO      | NCT00416624 | Epoetin Alfa or Darbepoetin Alfa in Treating Patients With Anemia Caused by Chemotherapy                                                                       | Completed  | Anemia Leukemia Lymphoma Lymphoproliferative Disorder Multiple Myeloma and Plasma Cell Neoplasm Precancerous Condition Unspecified Adult Solid Tumor, Protocol Specific | Drug: darbepoetin alfa Drug: epoetin alfa Procedure: fatigue assessment and management Procedure: quality-of-life assessment                            | The Percentage of Participants Who Exhibit a Hematopoietic Response Weekly Change in Hemoglobin Levels Time Required to Achieve Hemoglobin Levels $\geq$ 11.5 g/dL Mean Hemoglobin Change From Week 1 to Week 16 The Percentage of Participants Requiring Red Blood Cell (RBC) Transfusions The Total RBC Transfusion Needed The Percentage of Participants With Dose Omitted Due to Hematologic Reason The Percentage of Participants Reported Grade 3 or 4 Adverse Events Quality of Life as Measured by Functional Assessment of Cancer Therapy Scales for Anemia (FACT-AN) Over All Follow-up Evaluations Quality of Life as Measured by Linear Analogue Self Assessment Over All Follow-up Evaluation Quality of Life as Measured by Brief Fatigue Inventory Overall All Follow-up Evaluations Quality of Life as Measured by Symptom Distress Scale (SDS) | Phase 2         | 239        | May-07     | 10-Feb-17      |
| EPO      | NCT00496379 | ZK219477 (Sagopilone) in Patients With Breast Cancer and Brain Metastases                                                                                      | Terminated | Breast Cancer CNS Disease                                                                                                                                               | Drug: ZK219477                                                                                                                                          | Objective Response Rate in the Central Nervous System (CNS) Number of Subjects With Adverse Events (Any Grade) Objective Response Rate in Non-Central Nervous System (CNS) Sites Time to Progression at Any Site. Clinical Benefit Rate.                                                                                                                                                                                                                                                                                                                                                                                                                                                                                                                                                                                                                        | Phase 2         | 15         | Jul-07     | 14-Mar-13      |

|     |             |                                                                                                                               |            |                                                                                        |                                                                   |                                                                                                                                                                                                                                                                                                                                                                                                                                                                                                                                                                                                                                                                                                                                                                                                                                                                                                                                                                                                                                                                                                                                                                                                                                                                                                                                                                                                                                                                                                                                                                                                                                                                                                                                                                                                                                                                                                                                                                                                                                                                                                                                                                                                                                         |         |        |          |           |
|-----|-------------|-------------------------------------------------------------------------------------------------------------------------------|------------|----------------------------------------------------------------------------------------|-------------------------------------------------------------------|-----------------------------------------------------------------------------------------------------------------------------------------------------------------------------------------------------------------------------------------------------------------------------------------------------------------------------------------------------------------------------------------------------------------------------------------------------------------------------------------------------------------------------------------------------------------------------------------------------------------------------------------------------------------------------------------------------------------------------------------------------------------------------------------------------------------------------------------------------------------------------------------------------------------------------------------------------------------------------------------------------------------------------------------------------------------------------------------------------------------------------------------------------------------------------------------------------------------------------------------------------------------------------------------------------------------------------------------------------------------------------------------------------------------------------------------------------------------------------------------------------------------------------------------------------------------------------------------------------------------------------------------------------------------------------------------------------------------------------------------------------------------------------------------------------------------------------------------------------------------------------------------------------------------------------------------------------------------------------------------------------------------------------------------------------------------------------------------------------------------------------------------------------------------------------------------------------------------------------------------|---------|--------|----------|-----------|
| EPO | NCT01168349 | An Observational Study of NeoRecormon (Epoetin Beta) in Cancer Patients With Anemia (FAST)                                    | Completed  | Anemia, Neoplasms                                                                      | Drug: epoetin beta [NeoRecormon]                                  | Percentage of Participants With Early Treatment Response: Day 28 to 42 Percentage of Participants With Early Treatment Response: Day 21 to 42 Percentage of Participants With At Least 1 Red Blood Cell (RBC) Transfusion Mean Number of RBC Transfusions Mean Number of RBC Units Time to First RBC Transfusions Karnofsky Performance Status (KPS): Baseline KPS: Week 4 to 6 KPS: Week 12 to 16 KPS: Week 24 to 28 Percentage of Participants With Professional Activity: Baseline Percentage of Participants With At Least 1 Sick Leave Mean Number of Days of Sick Leave Self-Reported Questionnaire: Percentage of Participants With Current Employment at Baseline Self-Reported Questionnaire: Percentage of Participants With Current Employment at Week 4 to 6 Self-Reported Questionnaire: Percentage of Participants With Current Employment at Week 12 to 16 Self-Reported Questionnaire: Percentage of Participants With Current Employment at Week 24 to 28 Self-Reported Questionnaire: Change From Baseline on the Impact of Health on Regular Activities at Week 4 to 6 Self-Reported Questionnaire: Change From Baseline on the Impact of Health on Regular Activities at Week 12 to 16 Self-Reported Questionnaire: Change From Baseline on the Impact of Health on Regular Activities at Week 24 to 28 Mean Starting Dose of NeoRecormon® Injection Percentage of Participants With Starting Dose Between 360 and 540 IU/kg/Weeks Percentage of Participants With Pre-specified Dose and Frequency of Injections Percentage of Participants With Subcutaneous (SC) Route of Administration Percentage of Participants With NeoRecormon® SC Injections at a Weekly Dose of 30000 IU Percentage of Participants With Modifications of NeoRecormon® Regimen Percentage of Participants With Temporary Discontinuation From NeoRecormon® Treatment Percentage of Participants With Permanent Discontinuation From NeoRecormon® Treatment Relative Percent Change in Hb Concentration From Baseline Over the Study Period Percentage of Participants With Hb Concentration Within the Range of 10 to 12 g/dL Percentage of Participants With Adequate Iron Status Percentage of Participants With Vitamins Prescription | 1060    | Jan-10 | 2-Oct-15 |           |
| EPO | NCT00158379 | Taxol Carboplatin and Erythropoetin                                                                                           | Completed  | Ovarian Cancer                                                                         | Drug: Paclitaxel                                                  | Progression-free Survival. Progression is Defined According WHO-criteria as Appearance of Any New Lesion or Increase of Existing Lesions by at Least 25% Toxicity                                                                                                                                                                                                                                                                                                                                                                                                                                                                                                                                                                                                                                                                                                                                                                                                                                                                                                                                                                                                                                                                                                                                                                                                                                                                                                                                                                                                                                                                                                                                                                                                                                                                                                                                                                                                                                                                                                                                                                                                                                                                       | Phase 2 | 105    | Jul-03   | 6-Feb-17  |
| EPO | NCT00398047 | Azacitidine, Darbepoetin Alfa, and Erythropoietin and Filgrastim (G-CSF) in Treating Patients With Myelodysplastic Syndromes  | Terminated | Leukemia Myelodysplastic Syndromes                                                     | Drug: Azacitidine and Hematopoietic Growth Factors                | Number of Participants With Complete Response Rate of Major Hematological Improvement Minor Hematological Improvements Time to Progression to Acute Myeloid Leukemia (Blast ≥ 20%) or Death Overall Survival Change in Bone Marrow Apoptosis Expression of p53 and p21                                                                                                                                                                                                                                                                                                                                                                                                                                                                                                                                                                                                                                                                                                                                                                                                                                                                                                                                                                                                                                                                                                                                                                                                                                                                                                                                                                                                                                                                                                                                                                                                                                                                                                                                                                                                                                                                                                                                                                  | Phase 2 | 3      | Sep-06   | 6-Sep-18  |
| EPO | NCT00053001 | Thalidomide and Epoetin Alfa in Treating Anemia in Patients With Myelodysplastic Syndrome                                     | Completed  | Anemia Leukemia Myelodysplastic Syndromes Myelodysplastic/Myeloproliferative Neoplasms | Biological: epoetin alfa Drug: thalidomide                        | Clinical response                                                                                                                                                                                                                                                                                                                                                                                                                                                                                                                                                                                                                                                                                                                                                                                                                                                                                                                                                                                                                                                                                                                                                                                                                                                                                                                                                                                                                                                                                                                                                                                                                                                                                                                                                                                                                                                                                                                                                                                                                                                                                                                                                                                                                       | Phase 2 |        | Jun-01   | 26-Jun-13 |
| EPO | NCT00060398 | Epoetin Alfa With or Without Dexamethasone in Treating Fatigue and Anemia in Patients With Hormone-Refractory Prostate Cancer | Completed  | Anemia Fatigue Prostate Cancer                                                         | Biological: epoetin alfa Drug: dexamethasone                      | Fatigue response as measured by the Functional Assessment of Chronic Illness Therapy Fatigue Subscale Anemia response at 3 months Functional level as measured by the Functional Assessment of Cancer Therapy-General Scale and Brief Fatigue Inventory functional interference score monthly Symptom distress as measured by the Memorial Symptom Assessment Scale-Short Form and the number of symptoms monthly Quality of life as measured by the Functional Assessment of Cancer Therapy-General Scale                                                                                                                                                                                                                                                                                                                                                                                                                                                                                                                                                                                                                                                                                                                                                                                                                                                                                                                                                                                                                                                                                                                                                                                                                                                                                                                                                                                                                                                                                                                                                                                                                                                                                                                              | Phase 3 | 282    | Jun-04   | 12-May-09 |
| EPO | NCT00145652 | Adjuvant I.V. Iron Therapy During Erythropoetin Treatment of Anemic Patients With Lymphoproliferative Disorders.              | Completed  | Anemia Multiple Myeloma Non Hodgkin Lymphoma Chronic Lymphocytic Leukemia              | Drug: Neo-Recormon and Venofer                                    | To compare the mean change in hemoglobin (Hb) concentrations from baseline to EOT (End of treatment ) between the two treatment groups. The percentage of subjects with Hb response defined by an increase in the Hb concentration by at least 20 g/L in the absence of any RBC transfusion. The time needed to obtain a Hb response. The fraction of subjects receiving RBC transfusions during the study period. The dose of rHuEPO used. The effect on iron-status. The weekly Hb concentration profile over time. The Median time to achieve hemoglobin (Hb) level > 13 g/dL in each arm. Proportion of complete correctors (i.e. patients reaching Hb > 13 g/dL) before day 126 in each arm. Median time to increase Hb level by > 2 g/dL in each arm. Proportion of responders (i.e. patients increasing Hb by > 2 g/dL) before day 126 in each arm. Proportion of correctors (i.e. patients reaching Hb > 12 g/dL) before day 126 in each arm. Proportion of patients requiring red blood cell transfusions between day 28 and day 126 in each arm. Total number of red blood cell transfusions between day 28 and day 126 in each arm. Area under the curve of mean Hb level between day 28 and day 126 after the transplant in each arm. Mean Hb values on days 42, 56, 70, 84, 98, 112, and 126 in each                                                                                                                                                                                                                                                                                                                                                                                                                                                                                                                                                                                                                                                                                                                                                                                                                                                                                                                       | Phase 3 | 66     | Dec-03   | 30-Jul-07 |
| EPO | NCT00557817 | Erythropoietin (Epo) and Venofer Trial After Autologous Hematopoietic Stem Cell Transplantation (HSCT)                        | Completed  | Hematological Malignancies                                                             | Drug: Darbepoetin alpha (Aranesp) Drug: Iron saccharate (Venofer) |                                                                                                                                                                                                                                                                                                                                                                                                                                                                                                                                                                                                                                                                                                                                                                                                                                                                                                                                                                                                                                                                                                                                                                                                                                                                                                                                                                                                                                                                                                                                                                                                                                                                                                                                                                                                                                                                                                                                                                                                                                                                                                                                                                                                                                         | Phase 3 | 125    | Mar-04   | 11-Jan-10 |

|       |             |                                                                                                                                                                                                                          |           |                                                |                                                                                                                                                                                                                                                                        |                                                                                                                                                                                                                                                                                                                                                                                                                                                                                                                                                                                                                                                                                                                                                                                                                                                                                                                                                                                                                       |                 |     |           |           |
|-------|-------------|--------------------------------------------------------------------------------------------------------------------------------------------------------------------------------------------------------------------------|-----------|------------------------------------------------|------------------------------------------------------------------------------------------------------------------------------------------------------------------------------------------------------------------------------------------------------------------------|-----------------------------------------------------------------------------------------------------------------------------------------------------------------------------------------------------------------------------------------------------------------------------------------------------------------------------------------------------------------------------------------------------------------------------------------------------------------------------------------------------------------------------------------------------------------------------------------------------------------------------------------------------------------------------------------------------------------------------------------------------------------------------------------------------------------------------------------------------------------------------------------------------------------------------------------------------------------------------------------------------------------------|-----------------|-----|-----------|-----------|
| EPO   | NCT02469480 | Intravenous Ferric Carboxymaltose vs. Oral Iron Substitution in Patients With Metastatic Colorectal Cancer (CRC) and Iron Deficiency Anemia: a Randomized Multicenter Treatment Optimization Study.                      | Completed | Metastatic Colorectal Cancer                   | Drug: FerInject Drug: Ferro sanol                                                                                                                                                                                                                                      | Rise or normalization of hemoglobin Fatigue as measured by EORTC-QLQ-FA13 Quality of life as measured by EORTC-C30 Handgrip strength as measured by Hydraulic Hand Dynamometer Number of allogenic blood transfusions (in total and per patient) Time until rise or normalization of hemoglobin Genesis of the iron deficiency anemia Number of therapy with recombinant erythropoietin Dose of therapy with recombinant erythropoietin Duration of therapy with recombinant erythropoietin Inflammatory parameters Influence nutritional status on iron deficiency anemia as measured by Nutritional Risk Screening (NRS 2002) Influence nutritional status on therapy success as measured by Nutritional Risk Screening (NRS 2002) Tolerance Incidence and severity of                                                                                                                                                                                                                                              | Phase 2         | 64  | Mar-15    | 19-Oct-20 |
| G-CSF | NCT00646854 | Alemtuzumab and CHOP in T-cell Lymphoma                                                                                                                                                                                  | Completed | Lymphoma, T-Cell, Peripheral                   | Drug: CHOP14 chemotherapy (cyclophosphamide, hydroxydaunorubicin, vincristin, prednisone) plus G-CSF, combined with alemtuzumab Drug: CHOP14 chemotherapy (see specification)                                                                                          | Event-free Survival Overall survival Overall response rate Overall response rate related to the CD52 expression Tumor control or time-to-progression Safety measured as number of adverse events (AEs) and serious adverse events (SAEs) Feasibility of successful stem cell harvest i.e. >=2E6 CD34 positive cells                                                                                                                                                                                                                                                                                                                                                                                                                                                                                                                                                                                                                                                                                                   | Phase 3         | 136 | Jun-08    | 1-Mar-19  |
| G-CSF | NCT00032019 | Combination Chemotherapy and Monoclonal Antibody Therapy in Treating Patients With Non-Hodgkin's Lymphoma                                                                                                                | Completed | Lymphoma                                       | Biological: filgrastim Biological: rituximab Drug: cyclophosphamide Drug: doxorubicin hydrochloride Drug: etoposide Drug: prednisone Drug:                                                                                                                             | Response Progression free Survival Overall survival Toxicity                                                                                                                                                                                                                                                                                                                                                                                                                                                                                                                                                                                                                                                                                                                                                                                                                                                                                                                                                          | Phase 2         | 78  | Feb-02    | 19-Jul-16 |
| G-CSF | NCT02092922 | A Phase 2 Trial of Filanesib in Relapsed/Refractory Multiple Myeloma (AIFIRM)                                                                                                                                            | Completed | Advanced Multiple Myeloma                      | Drug: Filanesib, KSP (Eg5) inhibitor, intravenous Drug: Filgrastim, granulocyte-colony stimulating factor (G-CSF), subcutaneous                                                                                                                                        | In patients with low Baseline alpha 1-acid glycoprotein (AAG), assess the efficacy of the study drug in terms of objective response rate. In patients with high Baseline AAG, assess the efficacy of the study drug in terms of objective response rate. In all patients, assess the efficacy of the study drug in terms of duration of response. In all patients, assess the efficacy of the study drug in terms of progression-free survival. In all patients, assess the efficacy of study drug in terms of overall survival. In all patients, assess the safety of the study drug in terms of adverse events, clinical laboratory tests and electrocardiograms. In a subset of all patients, characterize the pharmacokinetics (PK) of the study drug in terms of plasma concentration-time profiles. In a subset of all patients, assess the correlation between study drug exposure and changes in corrected QT interval (QTc) in terms of changes in QTc versus time-matched study drug plasma concentrations. | Phase 2         | 154 | May-14    | 6-Oct-17  |
| G-CSF | NCT01858883 | Safety Study of Itacitinib (INCB039110) in Combination With Gemcitabine and Nab-Paclitaxel in Subjects With Advanced Solid Tumors                                                                                        | Completed | Solid Tumors Pancreatic Cancer                 | Drug: itacitinib Drug: Gemcitabine Drug: nab-paclitaxel Drug: filgrastim                                                                                                                                                                                               | Safety and tolerability of combination therapy study treatment itacitinib (INCB039110) plus nab-paclitaxel and gemcitabine as measured by the number of participants with adverse events Identify the Maximum Tolerated Dose (MTD) or Pharmacologically Active Dose (PAD) within a defined dose range for itacitinib (INCB039110) in the treatment regimens administered Pharmacokinetics of gemcitabine and paclitaxel administered with or without 2 concurrent itacitinib (INCB039110) Clinical activity as measured by the greatest decrease in tumor burden compared to baseline.                                                                                                                                                                                                                                                                                                                                                                                                                                | Phase 1 Phase 2 | 55  | Jun-13    | 18-Jul-19 |
| G-CSF | NCT00020943 | Chemotherapy and Rituximab With Peripheral Stem Cell Transplantation in Treating Patients With Mantle Cell Lymphoma                                                                                                      | Completed | Lymphoma                                       | Biological: filgrastim Biological: rituximab Drug: carmustine Drug: cyclophosphamide Drug: cytarabine Drug: doxorubicin hydrochloride Drug: etoposide Drug: leucovorin calcium Drug: methotrexate Drug: prednisone Drug: vincristine sulfate Procedure: peripheral     | Progression Free Survival Response Survival                                                                                                                                                                                                                                                                                                                                                                                                                                                                                                                                                                                                                                                                                                                                                                                                                                                                                                                                                                           | Phase 2         | 79  | Jun-01    | 19-Jul-16 |
| G-CSF | NCT00242996 | Rituximab, Cyclophosphamide, and G-CSF Followed By Combination Chemotherapy in Treating Patients Who Are Undergoing Autologous Stem Cell Transplant Followed By Rituximab and GM-CSF for Refractory Diffuse Large B-Cell | Completed | Lymphoma                                       | Biological: filgrastim Biological: rituximab Biological: sargramostim Drug: carmustine Drug: cyclophosphamide Drug: etoposide Procedure: adjuvant therapy Procedure: bone marrow ablation with stem cell support Procedure: peripheral blood stem cell transplantation | 2-year event free survival Overall survival                                                                                                                                                                                                                                                                                                                                                                                                                                                                                                                                                                                                                                                                                                                                                                                                                                                                                                                                                                           | Phase 2         | 44  | Mar-04    | 28-Sep-17 |
| G-CSF | NCT01057264 | HAI Abraxane With Gemcitabine and Bevacizumab                                                                                                                                                                            | Completed | Advanced Cancers                               | Drug: HAI Abraxane Drug: Gemcitabine Drug: Bevacizumab Drug:                                                                                                                                                                                                           | Maximum Tolerated Dose (MTD) of Escalating Doses of Hepatic Arterial Infusions of Abraxane in Combination with Gemcitabine and Bevacizumab                                                                                                                                                                                                                                                                                                                                                                                                                                                                                                                                                                                                                                                                                                                                                                                                                                                                            | Phase 1         | 78  | Jan-10    | 18-Nov-15 |
| G-CSF | NCT00101010 | Rituximab and Combination Chemotherapy in Treating Older Patients With Diffuse Large B-Cell Lymphoma                                                                                                                     | Completed | Lymphoma                                       | Biological: Filgrastim Biological: Pegfilgrastim Biological: Rituximab Drug: Cyclophosphamide Drug: Pegylated liposomal doxorubicin hydrochloride Drug: Prednisone Drug: Vincristine Sulfate                                                                           | Disease response (complete, complete unconfirmed, and partial responses) after courses 4 and 8 Cardiac toxicity as measured by LVEF on ECHO after courses 4 and 8 Survival Rate Disease-free survival                                                                                                                                                                                                                                                                                                                                                                                                                                                                                                                                                                                                                                                                                                                                                                                                                 | Phase 2         | 80  | Sep-05    | 11-Sep-14 |
| G-CSF | NCT00001563 | EPOCH Chemotherapy +/- IL-12 for Previously Untreated and EPOCH Plus Rituximab for Previously Treated Patients With AIDS-                                                                                                | Completed | AIDS Related Lymphoma AIDS-Associated Lymphoma | Biological: Filgrastim Biological: Rituximab Drug: EPOCH                                                                                                                                                                                                               | Determination of safety profile and response rates                                                                                                                                                                                                                                                                                                                                                                                                                                                                                                                                                                                                                                                                                                                                                                                                                                                                                                                                                                    | Phase 2         | 39  | 12-Dec-96 | 27-Jan-20 |

|       |             |                                                                                                                                      |           |                                                                                                                                                                                                                                                                                                                                                                                                                                                                                                                                                                                                                                                                                                                                                                                                                                                                                                                                                                                                                                                                                                                                                                                                                                                                                                                                                                                                                                                                                                                                                                                      |                                                                                                                                                                                                                                      |                                                                                                                                                                                                                                                                                                                                                                                                                                                                                                                                                                                                                                                                                                                                                                              |               |    |            |                |
|-------|-------------|--------------------------------------------------------------------------------------------------------------------------------------|-----------|--------------------------------------------------------------------------------------------------------------------------------------------------------------------------------------------------------------------------------------------------------------------------------------------------------------------------------------------------------------------------------------------------------------------------------------------------------------------------------------------------------------------------------------------------------------------------------------------------------------------------------------------------------------------------------------------------------------------------------------------------------------------------------------------------------------------------------------------------------------------------------------------------------------------------------------------------------------------------------------------------------------------------------------------------------------------------------------------------------------------------------------------------------------------------------------------------------------------------------------------------------------------------------------------------------------------------------------------------------------------------------------------------------------------------------------------------------------------------------------------------------------------------------------------------------------------------------------|--------------------------------------------------------------------------------------------------------------------------------------------------------------------------------------------------------------------------------------|------------------------------------------------------------------------------------------------------------------------------------------------------------------------------------------------------------------------------------------------------------------------------------------------------------------------------------------------------------------------------------------------------------------------------------------------------------------------------------------------------------------------------------------------------------------------------------------------------------------------------------------------------------------------------------------------------------------------------------------------------------------------------|---------------|----|------------|----------------|
| G-CSF | NCT01421173 | Vorinostat With Gemcitabine, Busulfan, and Melphalan With Stem Cell Transplant (SCT) in Relapsed or Refractory Lymphoid Malignancies | Completed | Lymphoma                                                                                                                                                                                                                                                                                                                                                                                                                                                                                                                                                                                                                                                                                                                                                                                                                                                                                                                                                                                                                                                                                                                                                                                                                                                                                                                                                                                                                                                                                                                                                                             | Drug: Vorinostat Drug: Gemcitabine Drug: Busulfan Drug: Melphalan Procedure: Stem Cell Infusion Drug: Rituximab Drug: G-CSF Drug: Palifermin Drug:                                                                                   | Recommended Dose of Vorinostat for combination with Gemcitabine/Busulfan/Melphalan (GemBuMel) based on Dose Limiting Toxicity (DLT)                                                                                                                                                                                                                                                                                                                                                                                                                                                                                                                                                                                                                                          | Phase 1       | 78 | Aug-11     | 18-Nov-15      |
| G-CSF | NCT00017381 | Monoclonal Antibody Therapy and Peripheral Stem Cell Transplant in Treating Patients With Non-Hodgkin's Lymphoma                     | Completed | Contiguous Stage II Adult Diffuse Large Cell Lymphoma Contiguous Stage II Adult Diffuse Small Cleaved Cell Lymphoma Contiguous Stage II Grade 1 Follicular Lymphoma Contiguous Stage II Grade 2 Follicular Lymphoma Contiguous Stage II Grade 3 Follicular Lymphoma Contiguous Stage II Mantle Cell Lymphoma Contiguous Stage II Marginal Zone Lymphoma Contiguous Stage II Small Lymphocytic Lymphoma Extranodal Marginal Zone B-cell Lymphoma of Mucosa-associated Lymphoid Tissue Noncontiguous Stage II Adult Diffuse Large Cell Lymphoma Noncontiguous Stage II Adult Diffuse Small Cleaved Cell Lymphoma Noncontiguous Stage II Grade 1 Follicular Lymphoma Noncontiguous Stage II Grade 2 Follicular Lymphoma Noncontiguous Stage II Grade 3 Follicular Lymphoma Noncontiguous Stage II Mantle Cell Lymphoma Noncontiguous Stage II Marginal Zone Lymphoma Noncontiguous Stage II Small Lymphocytic Lymphoma Recurrent Adult Diffuse Large Cell Lymphoma Recurrent Adult Diffuse Small Cleaved Cell Lymphoma Recurrent Grade 1 Follicular Lymphoma Recurrent Grade 2 Follicular Lymphoma Recurrent Grade 3 Follicular Lymphoma Recurrent Mantle Cell Lymphoma Recurrent Marginal Zone Lymphoma Recurrent Small Lymphocytic Lymphoma Stage I Adult Diffuse Large Cell Lymphoma Stage I Adult Diffuse Small Cleaved Cell Lymphoma Stage I Grade 1 Follicular Lymphoma Stage I Grade 2 Follicular Lymphoma Stage I Grade 3 Follicular Lymphoma Stage I Mantle Cell Lymphoma Stage I Marginal Zone Lymphoma Stage I Small Lymphocytic Lymphoma Stage III Adult Diffuse Large Cell | Biological: rituximab Drug: cyclophosphamide Biological: filgrastim Radiation: yttrium Y 90 ibritumomab tiuxetan Procedure: peripheral blood stem cell transplantation                                                               | MTD, defined in terms of clinical toxicities graded using the CTC version 2.0                                                                                                                                                                                                                                                                                                                                                                                                                                                                                                                                                                                                                                                                                                | Early Phase 1 | 30 | April 2001 | 9-Jan-13       |
| G-CSF | NCT01226849 | Feasibility Study Of Adding Bortezomib to R-ICE Chemotherapy To Treat Relapsed/ Refractory                                           | Completed | Diffuse Large B-Cell Lymphoma                                                                                                                                                                                                                                                                                                                                                                                                                                                                                                                                                                                                                                                                                                                                                                                                                                                                                                                                                                                                                                                                                                                                                                                                                                                                                                                                                                                                                                                                                                                                                        | Drug: bortezomib, rituximab, ifosphamide, etoposide, carboplatin                                                                                                                                                                     | To evaluate number of participants with adverse events with R-ICE plus bortezomib (VR-ICE) Response rate                                                                                                                                                                                                                                                                                                                                                                                                                                                                                                                                                                                                                                                                     | Phase 1       | 6  | Nov-10     | April 27, 2017 |
| G-CSF | NCT01248923 | A Study of ARRY-520 and Bortezomib Plus Dexamethasone in Patients With Relapsed/Refractory Multiple Myeloma                          | Completed | Multiple Myeloma, Plasma Cell Leukemia                                                                                                                                                                                                                                                                                                                                                                                                                                                                                                                                                                                                                                                                                                                                                                                                                                                                                                                                                                                                                                                                                                                                                                                                                                                                                                                                                                                                                                                                                                                                               | Drug: ARRY-520, KSP(Eg5) inhibitor; intravenous Drug: Bortezomib, proteasome inhibitor; intravenous or subcutaneous Drug: Dexamethasone, steroid; oral Drug: Filgrastim, granulocyte-colony stimulating factor (G-CSF); subcutaneous | Characterize the safety profile of the study drug in combination with bortezomib ± dexamethasone + G-CSF in terms of adverse events, clinical laboratory tests and electrocardiograms. Establish the maximum tolerated dose (MTD) of the study drug in combination with bortezomib ± dexamethasone + G-CSF. Assess the efficacy of study drug in combination with bortezomib ± dexamethasone + G-CSF in terms of best overall response Assess the efficacy of study drug in combination with bortezomib ± dexamethasone + G-CSF in terms of duration of response, time to progression, treatment-free interval and time to next treatment. Assess the pharmacokinetic (PK) drug interactions between ARRY-520 and bortezomib in terms of plasma concentration-time profiles. | Phase 1       | 55 | Dec-10     | April 22, 2016 |

|       |             |                                                                                                                             |           |                                                                                                                                                                                                                                                                                                                                                                                                                                                                                                                                                                                                                                                                                                                                                                                                                                                                                                                                                                                                                                                                                                                                                                                                                                                                                                                                                                                                                                                                                                                                                                                                                            |                                                                                                                                                                                                                                                                                 |                                                                                                                                                                                                                                                                                                                                                                                                                                                                                                                                                                                                                                                                                                                                                                                                                                                                                                           |         |     |        |           |
|-------|-------------|-----------------------------------------------------------------------------------------------------------------------------|-----------|----------------------------------------------------------------------------------------------------------------------------------------------------------------------------------------------------------------------------------------------------------------------------------------------------------------------------------------------------------------------------------------------------------------------------------------------------------------------------------------------------------------------------------------------------------------------------------------------------------------------------------------------------------------------------------------------------------------------------------------------------------------------------------------------------------------------------------------------------------------------------------------------------------------------------------------------------------------------------------------------------------------------------------------------------------------------------------------------------------------------------------------------------------------------------------------------------------------------------------------------------------------------------------------------------------------------------------------------------------------------------------------------------------------------------------------------------------------------------------------------------------------------------------------------------------------------------------------------------------------------------|---------------------------------------------------------------------------------------------------------------------------------------------------------------------------------------------------------------------------------------------------------------------------------|-----------------------------------------------------------------------------------------------------------------------------------------------------------------------------------------------------------------------------------------------------------------------------------------------------------------------------------------------------------------------------------------------------------------------------------------------------------------------------------------------------------------------------------------------------------------------------------------------------------------------------------------------------------------------------------------------------------------------------------------------------------------------------------------------------------------------------------------------------------------------------------------------------------|---------|-----|--------|-----------|
| G-CSF | NCT00023959 | Bevacizumab, Fluorouracil, and Hydroxyurea Plus Radiation Therapy in Treating Patients With Advanced Head and Neck Cancer   | Completed | Metastatic Squamous Neck Cancer With Occult Primary Squamous Cell Carcinoma Recurrent Adenoid Cystic Carcinoma of the Oral Cavity Recurrent Basal Cell Carcinoma of the Lip Recurrent Esthesioneuroblastoma of the Paranasal Sinus and Nasal Cavity Recurrent Inverted Papilloma of the Paranasal Sinus and Nasal Cavity Recurrent Lymphoepithelioma of the Nasopharynx Recurrent Lymphoepithelioma of the Oropharynx Recurrent Metastatic Squamous Neck Cancer With Occult Primary Recurrent Midline Lethal Granuloma of the Paranasal Sinus and Nasal Cavity Recurrent Mucoepidermoid Carcinoma of the Oral Cavity Recurrent Salivary Gland Cancer Recurrent Squamous Cell Carcinoma of the Hypopharynx Recurrent Squamous Cell Carcinoma of the Larynx Recurrent Squamous Cell Carcinoma of the Lip and Oral Cavity Recurrent Squamous Cell Carcinoma of the Nasopharynx Recurrent Squamous Cell Carcinoma of the Oropharynx Recurrent Squamous Cell Carcinoma of the Paranasal Sinus and Nasal Cavity Recurrent Verrucous Carcinoma of the Larynx Recurrent Verrucous Carcinoma of the Oral Cavity Stage III Adenoid Cystic Carcinoma of the Oral Cavity Stage III Basal Cell Carcinoma of the Lip Stage III Esthesioneuroblastoma of the Paranasal Sinus and Nasal Cavity Stage III Inverted Papilloma of the Paranasal Sinus and Nasal Cavity Stage III Lymphoepithelioma of the Nasopharynx Stage III Lymphoepithelioma of the Oropharynx Stage III Midline Lethal Granuloma of the Paranasal Sinus and Nasal Cavity Stage III Mucoepidermoid Carcinoma of the Oral Cavity Stage III Salivary Gland Cancer Stage II | Drug: hydroxyurea Drug: fluorouracil Biological: bevacizumab Radiation: radiation therapy Biological: filgrastim Other: laboratory biomarker analysis                                                                                                                           | MTD defined as the dose preceding that at which at least 2 of 3 or 2 of 6 patients experience dose-limiting toxicity assessed using NCI CTCAE version 3.0 Objective response rate (CR+PR) assessed using RECIST criteria Pattern of failure, described as locoregional, distant, or both Duration of response Progression free survival Overall survival                                                                                                                                                                                                                                                                                                                                                                                                                                                                                                                                                  | Phase 1 | 39  | Jul-01 | 7-Feb-13  |
| G-CSF | NCT00671658 | Modified Hyper-CVAD (Cyclophosphamide, Vincristine, Adriamycin, and Dexamethasone) Program for Acute Lymphoblastic Leukemia | Completed | Leukemia Acute Lymphoblastic Leukemia                                                                                                                                                                                                                                                                                                                                                                                                                                                                                                                                                                                                                                                                                                                                                                                                                                                                                                                                                                                                                                                                                                                                                                                                                                                                                                                                                                                                                                                                                                                                                                                      | Drug: Rituximab Drug: Cyclophosphamide (CTX) Drug: Doxorubicin Drug: Vincristine Drug: Dexamethasone Drug: Methotrexate (MTX) Drug: Cytarabine Drug: G-CSF Drug: Mesna Drug: Pegylated asparaginase Drug: Pegfilgrastim Drug:                                                   | Overall Response Rate                                                                                                                                                                                                                                                                                                                                                                                                                                                                                                                                                                                                                                                                                                                                                                                                                                                                                     | Phase 2 | 220 | Nov-02 | 26-Aug-13 |
| G-CSF | NCT00309556 | Randomized Neoadjuvant Study of Epirubicin and Docetaxel With/Without Capecitabine in Early                                 | Completed | Breast Cancer                                                                                                                                                                                                                                                                                                                                                                                                                                                                                                                                                                                                                                                                                                                                                                                                                                                                                                                                                                                                                                                                                                                                                                                                                                                                                                                                                                                                                                                                                                                                                                                                              | Drug: Epirubicin Drug: Docetaxel Drug: Capecitabine Drug: Trastuzumab                                                                                                                                                                                                           | Rate of pathological complete remissions Rates of axillary lymph node involvement and breast-conserving procedures                                                                                                                                                                                                                                                                                                                                                                                                                                                                                                                                                                                                                                                                                                                                                                                        | Phase 3 | 536 | Feb-05 | 30-Dec-11 |
| G-CSF | NCT01989325 | A Study of Filanesib (ARRY-520) and Carfilzomib in Patients With Advanced Multiple Myeloma                                  | Completed | Advanced Multiple Myeloma                                                                                                                                                                                                                                                                                                                                                                                                                                                                                                                                                                                                                                                                                                                                                                                                                                                                                                                                                                                                                                                                                                                                                                                                                                                                                                                                                                                                                                                                                                                                                                                                  | Drug: Carfilzomib, proteasome inhibitor; intravenous Drug: Filanesib, KSP(Eg5) inhibitor; intravenous Drug: Dexamethasone, steroid; oral or intravenous Drug: Filgrastim, granulocyte-colony stimulating factor (G-CSF); subcutaneous                                           | Assess the efficacy of both carfilzomib + study drug and single-agent carfilzomib in terms of progression-free survival. Assess the efficacy of both carfilzomib + study drug and single-agent carfilzomib in terms of objective response rate. Assess the safety of both carfilzomib + study drug and single-agent carfilzomib in terms of adverse events, clinical laboratory tests and electrocardiograms. Characterize the pharmacokinetics (PK) of study drug, carfilzomib and a carfilzomib metabolite in patients treated with carfilzomib + study drug in terms of plasma concentration-time profiles and model-based PK parameters. Following crossover from single-agent carfilzomib, assess the efficacy of carfilzomib + study drug in terms of objective response rate. Following crossover from single-agent carfilzomib, assess the safety of carfilzomib + study drug in terms of adverse | Phase 2 | 77  | Nov-13 | 29-Jul-16 |
| G-CSF | NCT00450827 | Iodine I 131 Monoclonal Antibody 3F8 and Bevacizumab in Treating Patients With Relapsed or Refractory Neuroblastoma         | Completed | Neuroblastoma                                                                                                                                                                                                                                                                                                                                                                                                                                                                                                                                                                                                                                                                                                                                                                                                                                                                                                                                                                                                                                                                                                                                                                                                                                                                                                                                                                                                                                                                                                                                                                                                              | Biological: bevacizumab Biological: filgrastim Procedure: autologous hematopoietic stem cell transplantation Radiation: iodine I 131                                                                                                                                            | Maximum tolerated dose (MTD)                                                                                                                                                                                                                                                                                                                                                                                                                                                                                                                                                                                                                                                                                                                                                                                                                                                                              | Phase 1 | 25  | Aug-06 | 28-Sep-15 |
| G-CSF | NCT01490723 | Zevalin-Containing Nonmyeloablative Conditioning for Stem Cell Transplantation (SCT)                                        | Completed | Leukemia Lymphoma                                                                                                                                                                                                                                                                                                                                                                                                                                                                                                                                                                                                                                                                                                                                                                                                                                                                                                                                                                                                                                                                                                                                                                                                                                                                                                                                                                                                                                                                                                                                                                                                          | Drug: Rituximab Drug: 111In Ibritumomab Procedure: Planar Scintigraphy Imaging Drug: 90Y Ibritumomab Tiuxetan Drug: Fludarabine Drug: Bendamustine Drug: Thymoglobulin Drug: Tacrolimus Drug: Methotrexate Drug: Mycophenolate Drug: G-CSF Procedure: Stem Cell Transplantation | 100 Day Treatment-Related Mortality (TRM) Overall Survival (OS)                                                                                                                                                                                                                                                                                                                                                                                                                                                                                                                                                                                                                                                                                                                                                                                                                                           | Phase 2 | 20  | Jan-13 | 15-May-19 |

|       |             |                                                                                                                                                                                                      |           |                                                                                                                             |                                                                                                                                                                                                                                                               |                                                                                                                                                                                                                                                                                                                                                                                                                                                                                                                                                                                                                                                                                                        |               |     |            |            |
|-------|-------------|------------------------------------------------------------------------------------------------------------------------------------------------------------------------------------------------------|-----------|-----------------------------------------------------------------------------------------------------------------------------|---------------------------------------------------------------------------------------------------------------------------------------------------------------------------------------------------------------------------------------------------------------|--------------------------------------------------------------------------------------------------------------------------------------------------------------------------------------------------------------------------------------------------------------------------------------------------------------------------------------------------------------------------------------------------------------------------------------------------------------------------------------------------------------------------------------------------------------------------------------------------------------------------------------------------------------------------------------------------------|---------------|-----|------------|------------|
| G-CSF | NCT01148446 | R-CHOP Versus R-mini-CEOP in Elderly Patients(>65)With DLBCL                                                                                                                                         | Completed | Elderly Patients (>65 Years)Diffuse Large B Cell Lymphoma (DLBCL)                                                           | Drug: CyclophosphamideDrug: DoxorubicinDrug: VincristineDrug: PrednisoneDrug: VinblastineDrug: RituximabDrug: G-CSF                                                                                                                                           | Event Free Survival (EFS)Complete Remission (CR) rateDisease Free Survival (DFS)Multidimensional Evaluation Scale for the definition of "frail" and "non frail" patients                                                                                                                                                                                                                                                                                                                                                                                                                                                                                                                               | Phase 3       | 226 | Jan-03     | 22-Jun-10  |
| G-CSF | NCT00058422 | Rituximab and Combination Chemotherapy Combined With Yttrium Y 90 Ibritumomab Tiuxetan in Treating Older Patients With Previously Untreated B-Cell Lymphoma                                          | Completed | Lymphoma                                                                                                                    | Biological: darbeoetin alfaBiological: filgrastimBiological: rituximabDrug: cyclophosphamideDrug: doxorubicin hydrochlorideDrug: prednisoneDrug: vincristine sulfateRadiation: indium In 111 ibritumomab tiuxetanRadiation: yttrium Y 90 ibritumomab tiuxetan | Overall survivalProgression-free survivalEvent-free survivalincidence of adverse experiencesConversion rate to complete remission                                                                                                                                                                                                                                                                                                                                                                                                                                                                                                                                                                      | Phase 2       | 65  | Feb-03     | 15-Nov-19  |
| G-CSF | NCT01481272 | Ofatumumab With IVAC Salvage Chemotherapy in Diffuse Large B Cell Lymphoma Patients                                                                                                                  | Completed | Diffuse Large B Cell Lymphoma                                                                                               | Drug: OfatumumabDrug: EtoposideDrug: IfosfamidDrug: MesnaDrug: CytarabineDrug: MethotrexateDrug: LeukovorinDrug: Granulocyte-Colony                                                                                                                           | Response rateProgression-free survivalEvent-free survivalOverall survivalNumber of participants with adverse events as a measure of safety and tolerability                                                                                                                                                                                                                                                                                                                                                                                                                                                                                                                                            | Phase 2       | 77  | Nov-11     | 17-Jul-17  |
| G-CSF | NCT00787969 | Rituximab, Cladribine, and Temozolimus in Treating Patients With Newly Diagnosed Mantle Cell Lymphoma                                                                                                | Completed | Lymphoma                                                                                                                    | Biological: rituximabDrug: cladribineDrug: temsirolimusBiological: FilgrastimBiological: Pegfilgrastim                                                                                                                                                        | Number of dose limiting toxicity incidents as per National Cancer Institute (NCI) Common Terminology Criteria for Adverse Events (CTCAE) version (v) 3.0 (Phase I)Proportion of complete tumor responses defined as complete remission (CR) as the objective status (Phase II)Overall survivalProgression-free survival (PFS)Time to disease progressionDuration of response, defined as date at which the patient's objective status is first noted to be either a CR or partial remission to the date progression is                                                                                                                                                                                 | Phase 1       | 74  | April 2009 | 9-Jan-18   |
| G-CSF | NCT00392691 | Melphalan, Yttrium Y 90 Ibritumomab Tiuxetan, and Rituximab Followed by Autologous Stem Cell Transplant in Treating Older Patients With Non-Hodgkin's Lymphoma That Has Relapsed or Not Responded to | Completed | Lymphoma                                                                                                                    | Drug: ibritumomab tiuxetanDrug: rituximabDrug: melphalanDrug: vinorelbine tartrate / G-CSFProcedure: autologous hematopoietic stem cell harvesting and transplantation                                                                                        | Dose-limiting toxicity of high-dose melphalan in combination with yttrium Y 90 ibritumomab tiuxetanToxicityEvent occurrence up to 100 days after transplantationComplete remission 100 days after transplantation                                                                                                                                                                                                                                                                                                                                                                                                                                                                                      | Phase 1       | 20  | Oct-06     | 15-May-19  |
| G-CSF | NCT00058292 | Radiolabeled Monoclonal Antibody Therapy and High-Dose Chemotherapy Followed By Autologous Peripheral Stem Cell Transplant in Treating Patients With Relapsed or Refractory Non-                     | Completed | Lymphoma                                                                                                                    | Biological: filgrastimBiological: rituximabDrug: CarmustineDrug: cytarabineDrug: etoposideDrug: melphalanProcedure: peripheral blood stem cell transplantationRadiation: yttrium Y 90 ibritumomab tiuxetan                                                    | Determine the maximum tolerated dose of absorbed radiation to critical organs delivered with this combination of study treatments                                                                                                                                                                                                                                                                                                                                                                                                                                                                                                                                                                      | Phase 1       | 44  | April 2000 | 1-Jun-12   |
| G-CSF | NCT02626338 | Pilot Study of Crenolanib Combined With Standard Salvage Chemotherapy in Subjects With R/R                                                                                                           | Completed | Relapsed/Refractory Acute Myeloid Leukemia (AML)                                                                            | Drug: CrenolanibDrug: MitoxantroneDrug: CytarabineDrug: EtoposideDrug: FludarabineDrug: G-CSFDrug: Idarubicin                                                                                                                                                 | To determine the safety, dose-limiting toxicities and maximum tolerated dose (or confirm the target dose of 100 mg TID) of crenolanib given sequentially following standard salvage chemotherapy regimens in subjects with refractory/relapsed AML                                                                                                                                                                                                                                                                                                                                                                                                                                                     | Phase 1       | 16  | Feb-16     | 14-May-19  |
| G-CSF | NCT01654965 | Tivantinib and Topotecan Hydrochloride in Treating Patients With Advanced or Metastatic Solid                                                                                                        | Completed | Adult Solid Neoplasm                                                                                                        | Other: Laboratory Biomarker AnalysisBiological: PegfilgrastimOther: Pharmacological StudyDrug:                                                                                                                                                                | Incidence of adverse events graded according to the NCI CTCAE version 4.0Tumor response as evaluated by Response Evaluation Criteria in Solid Tumors version 1.1Progression-free survival (PFS)Overall survival (OS)                                                                                                                                                                                                                                                                                                                                                                                                                                                                                   | Phase 1       | 17  | 24-Jul-12  | April 2018 |
| G-CSF | NCT01760226 | Dose Adjusted EPOCH-R, to Treat Mature B Cell Malignancies                                                                                                                                           | Completed | Diffuse Large B Cell LymphomaPost Transplant Lymphoproliferative DisorderPrimary Mediastinal (Thymic) Large B-cell Lymphoma | Drug: DA-EPOCH-R for DLBCL, PTLD, AND PMBCLDrug: MethotrexateDrug: EtoposideDrug: DoxorubicinDrug: VincristineDrug: RituximabDrug: CyclophosphamideDrug: PrednisoneDrug: G-CSF                                                                                | Measure and assess adverse eventsMeasure and assess immune function                                                                                                                                                                                                                                                                                                                                                                                                                                                                                                                                                                                                                                    | Early Phase 1 | 4   | Jan-13     | 17-Nov-17  |
| G-CSF | NCT00278408 | Rituximab and Combination Chemotherapy With or Without Radiation Therapy in Treating Patients With B-Cell Non-Hodgkin's Lymphoma                                                                     | Completed | Lymphoma                                                                                                                    | Biological: filgrastimBiological: rituximabDrug: cyclophosphamideDrug: doxorubicin hydrochlorideDrug: prednisoneDrug: vincristine sulfateRadiation: radiation therapy                                                                                         | Time to treatment failure (TTF) measured from day 1 of course 1 of cyclophosphamide, doxorubicin, vincristine, and prednisone (CHOP) therapy up to 3 years on study with life-long follow-upComplete response (CR) rate until first relapseProgression rate during treatmentSurvivalTumor control measured from day 1 of course 1 of CHOP therapy (non-tumor related events are censored)Disease-free survival measured from day 1 of course 1 of CHOP therapyRelapse-free survival of patients with complete response (CR) or unconfirmed complete response (CRu) following complete immunochemotherapySafety (adverse events, serious adverse events) assessed at 3 months after completion of study | Phase 3       | 700 | Nov-05     | April 2019 |
| G-CSF | NCT01806337 | CHO(E)P-14 Followed by Alemtuzumab Consolidation in Peripheral T Cell Lymphoma                                                                                                                       | Completed | Peripheral T-Cell Lymphoma                                                                                                  | Drug: Alemtuzumab                                                                                                                                                                                                                                             | Feasibility of alemtuzumab consolidation after CHO(E)P 14 induction chemotherapyrate of complete remissionsOverall survival                                                                                                                                                                                                                                                                                                                                                                                                                                                                                                                                                                            | Phase 2       | 41  | Jul-03     | 7-Mar-13   |
| G-CSF | NCT00086944 | Oblimersen, Rituximab and Combination Chemotherapy in Treating Patients With Relapsed or Refractory Aggressive Non-                                                                                  | Completed | Recurrent Adult Diffuse Large Cell LymphomaRecurrent Grade 3 Follicular LymphomaRecurrent Mantle Cell Lymphoma              | Biological: oblimersen sodiumBiological: rituximabDrug: ifosfamideDrug: carboplatinDrug: etoposideBiological: filgrastimBiological: pegfilgrastimOther:                                                                                                       | Toxicity graded using the NCI CTCAE version 3.0Complete and partial response rate according to the International Workshop CriteriaDuration of responseOverall survivalTime to progression                                                                                                                                                                                                                                                                                                                                                                                                                                                                                                              | Phase 1       | 25  | May-04     | 24-Jan-13  |
| G-CSF | NCT01044485 | Lapatinib in Combination With Docetaxel in Patients With HER-2 Positive Advanced or Metastatic Breast Cancer                                                                                         | Completed | Metastatic Breast Cancer                                                                                                    | Drug: lapatinibDrug: docetaxel                                                                                                                                                                                                                                | To determine the optimal tolerated regimen of lapatinib administered in combination with docetaxel as first-line therapy in patients with metastatic breast cancerTo evaluate the dose-limiting toxicityTo evaluate anti-tumour activity in terms of responseTo evaluate anti-tumour activity in time to responseTo evaluate anti-tumour activity in terms of response durationTo evaluate anti-tumour activity, in terms time to progression (TTP)To evaluate anti-tumour activity, in terms of time to treatment failure (TTF)To evaluate anti-tumour                                                                                                                                                | Phase 1       | 17  | Nov-08     | 25-Sep-12  |

|       |             |                                                                                                                                                                               |           |                                                                                                                   |                                                                                                                                                                                                                                                                                                                                                                                                                                                                                                                                   |                                                                                                                                                                                                                                                                    |         |     |            |                |
|-------|-------------|-------------------------------------------------------------------------------------------------------------------------------------------------------------------------------|-----------|-------------------------------------------------------------------------------------------------------------------|-----------------------------------------------------------------------------------------------------------------------------------------------------------------------------------------------------------------------------------------------------------------------------------------------------------------------------------------------------------------------------------------------------------------------------------------------------------------------------------------------------------------------------------|--------------------------------------------------------------------------------------------------------------------------------------------------------------------------------------------------------------------------------------------------------------------|---------|-----|------------|----------------|
| G-CSF | NCT00498316 | Cord Blood Expansion on Mesenchymal Stem Cells                                                                                                                                | Completed | Myelodysplastic Syndrome Leukemia                                                                                 | Procedure: Cord Blood Infusion Drug: Busulfan Drug: Fludarabine Drug: Rituximab Other: ATG Drug: Cyclophosphamide Drug: Clofarabine Radiation: Total Body Irradiation (TBI) Drug: Melphalan Drug: Tacrolimus Drug: Mycophenolate                                                                                                                                                                                                                                                                                                  | Engraftment and Time to Engraftment                                                                                                                                                                                                                                | Phase 1 | 98  | Jul-07     | 31-Oct-16      |
| G-CSF | NCT01191060 | Study Comparing Conventional Dose Combination RVD to High-Dose Treatment With ASCT in the Initial Myeloma up to 65 Years                                                      | Completed | Myeloma                                                                                                           | Drug: Lenalidomide, Bortezomib                                                                                                                                                                                                                                                                                                                                                                                                                                                                                                    | Progression Free Survival Response Rates Time To Progression Toxicity comparison Genetic prognostic groups definition Best treatment examination in each GEP-defined prognostic group.                                                                             | Phase 3 | 700 | Oct-10     | April 18, 2019 |
| G-CSF | NCT00003658 | Pentostatin, Cyclophosphamide, and Rituximab in Treating Patients With Chronic Lymphocytic Leukemia or Other B-cell Cancers                                                   | Completed | Leukemia Lymphoma                                                                                                 | Biological: filgrastim Biological: rituximab Drug: cyclophosphamide Drug: pentostatin                                                                                                                                                                                                                                                                                                                                                                                                                                             |                                                                                                                                                                                                                                                                    | Phase 2 | 60  | Sep-98     | 25-Jun-13      |
| G-CSF | NCT00028665 | Cyclophosphamide W/or W/Out Rituximab and Peripheral Stem Cell Transplantation in Patients With Recurrent Non-Hodgkin's Lymphoma                                              | Completed | Lymphoma                                                                                                          | Biological: filgrastim Biological: rituximab Drug: carmustine Drug: cisplatin Drug: cyclophosphamide Drug: etoposide Procedure: bone marrow ablation with stem cell support Procedure: peripheral blood stem cell                                                                                                                                                                                                                                                                                                                 | Total CD34 cells T and B lymphocyte counts Disease response Engraftment                                                                                                                                                                                            | Phase 2 | 37  | Jun-00     | 10-Jun-10      |
| G-CSF | NCT01467115 | Induction Chemotherapy Followed by Cetuximab and Radiation Therapy for Head and Neck Cancer                                                                                   | Completed | Head and Neck Cancer                                                                                              | Radiation: Radiotherapy Drug: Leucovorin Biological: Cetuximab Drug: Filgrastim Drug: Erythropoetin Drug: Cisplatin Drug: Fluorouracil Drug:                                                                                                                                                                                                                                                                                                                                                                                      | Organ Sparing Survival Overall Survival                                                                                                                                                                                                                            | Phase 2 | 1   | Mar-10     | 9-May-17       |
| G-CSF | NCT00023998 | Chemotherapy With or Without Trastuzumab in Treating Patients With Metastatic Osteosarcoma                                                                                    | Completed | Metastatic Osteosarcoma                                                                                           | Drug: doxorubicin hydrochloride Drug: cisplatin Drug: methotrexate Drug: leucovorin calcium Biological: filgrastim Procedure: therapeutic conventional surgery Radiation: radiation therapy Drug: etoposide Drug: ifosfamide Biological: trastuzumab Other: Drug: Rituximab Drug: Epirubicin Drug: Cyclophosphamide Drug: Vincristine Drug: Prednisone Drug: Granulocyte-colony-stimulating factor Drug: Mitoxantrone Drug: Cytarabine ARA-C Drug: Dexamethasone Drug: Carmustine BCNU Drug: Etoposide Drug: Melphalan Radiation: | Feasibility and safety of treatment assessed using CTC version 2.0 Response rate Event free survival (EFS)                                                                                                                                                         | Phase 2 | 80  | Jul-01     | 4-Feb-13       |
| G-CSF | NCT00556127 | Rituximab in Addition to Chemotherapy With Autologous Stem Cell Transplantation as Treatment Diffuse Large B-Cell Lymphoma                                                    | Completed | Diffuse Large B-Cell Lymphoma POOR PROGNOSIS                                                                      | Drug: Rituximab Drug: Epirubicin Drug: Cyclophosphamide Drug: Vincristine Drug: Prednisone Drug: Granulocyte-colony-stimulating factor Drug: Mitoxantrone Drug: Cytarabine ARA-C Drug: Dexamethasone Drug: Carmustine BCNU Drug: Etoposide Drug: Melphalan Radiation:                                                                                                                                                                                                                                                             | Failure-free survival                                                                                                                                                                                                                                              | Phase 2 | 94  | Jun-02     | 9-Nov-07       |
| G-CSF | NCT00072007 | Cladribine and Rituximab as Remission Induction Therapy Followed By Rituximab and Stem Cell Mobilization in Treating Patients With CLL                                        | Completed | Leukemia                                                                                                          | Biological: filgrastim Biological: rituximab Drug: CHOP regimen Drug: cladribine Drug: cyclophosphamide Drug: doxorubicin hydrochloride Drug: prednisone Drug: vincristine sulfate                                                                                                                                                                                                                                                                                                                                                | Complete-remission rate after induction Very good partial remission and nodular partial remission after induction Toxicity (hematotoxicity and infection rate) at 30 days following study treatment                                                                | Phase 2 | 43  | Jun-02     | 15-May-12      |
| G-CSF | NCT00199082 | Trial for the Treatment of Newly Diagnosed Mature B-Cell Acute Lymphoblastic Leukemia (B-ALL), Burkitt's Non-Hodgkin's Lymphoma (NHL) and Other High-grade Lymphoma in Adults | Completed | Burkitt's Lymphoma Burkitt's Leukemia Mediastinal Neoplasms Lymphoblastic Lymphoma Large Cell Anaplastic Lymphoma | Drug: Adriamycin Drug: Cyclophosphamide Drug: Cytarabine Drug: Dexamethasone/Prednisolone Drug: VP16 Drug: Ifosfamide Drug: Methotrexate Drug: G-CSF Drug: Rituximab Drug:                                                                                                                                                                                                                                                                                                                                                        | Remission rate Remission duration Disease free survival Overall survival Dose and time compliance Toxicity according to National Cancer Institute (NCI)-Common Toxicity Criteria (CTC) Death under therapy and in complete remission (CR) Localisations of relapse | Phase 4 | 650 | Jul-02     | 5-Aug-16       |
| G-CSF | NCT00199004 | Trial for Treatment of Adult Patients With Standard Risk Acute Lymphoblastic Leukemia With Chemotherapy and Rituximab                                                         | Completed | Adult Acute Lymphocytic Leukemia                                                                                  | Drug: Cyclophosphamide Drug: Dexamethasone / Prednisolone Drug: Vincristine Drug: Daunorubicin Drug: Asparaginase Drug: Methotrexate Drug: Cytarabine Drug: Mercaptopurine Drug: G-CSF Drug: Vindesine Drug: VP16 Drug: Adriamycin Drug: Thioguanine Drug: VM26 Drug: Rituximab Procedure: CNS irradiation Procedure: Mediastinal irradiation (if residual TU) Procedure: Stem                                                                                                                                                    | Remission rate (cytologic, Remission rate (molecular), Remission duration, Disease free survival, Overall survival Dose and time compliance, Toxicity according to WHO, Death in induction and CR, Course of MRD                                                   | Phase 4 | 60  | April 2004 | 23-Aug-10      |
| G-CSF | NCT00002800 | Chemotherapy in Treating Patients With Newly Diagnosed Acute or Chronic Myelogenous Leukemia or Myelodysplastic Syndrome                                                      | Completed | Leukemia Myelodysplastic Syndromes Neutropenia                                                                    | Biological: filgrastim Biological: lincuzumab Drug: cytarabine Drug: etoposide Drug: idarubicin                                                                                                                                                                                                                                                                                                                                                                                                                                   |                                                                                                                                                                                                                                                                    | Phase 2 | 60  | Jul-96     | 3-Jul-13       |

|       |             |                                                                                                                                                                                                                                    |           |                                                                                                                                                                         |                                                                                                                                                                                                                                                                                                                                                                                                                                          |                                                                                                                                                                                                                                                                                                                              |                |     |           |           |
|-------|-------------|------------------------------------------------------------------------------------------------------------------------------------------------------------------------------------------------------------------------------------|-----------|-------------------------------------------------------------------------------------------------------------------------------------------------------------------------|------------------------------------------------------------------------------------------------------------------------------------------------------------------------------------------------------------------------------------------------------------------------------------------------------------------------------------------------------------------------------------------------------------------------------------------|------------------------------------------------------------------------------------------------------------------------------------------------------------------------------------------------------------------------------------------------------------------------------------------------------------------------------|----------------|-----|-----------|-----------|
| G-CSF | NCT00005631 | Rituximab and Combination Chemotherapy in Treating Patients With Relapsed or Refractory Large Cell Lymphoma                                                                                                                        | Completed | Lymphoma                                                                                                                                                                | Biological: filgrastim Biological: rituximab Drug: carboplatin Drug: etoposide Drug: ifosfamide                                                                                                                                                                                                                                                                                                                                          |                                                                                                                                                                                                                                                                                                                              | Phase 2        |     | Nov-99    | 19-Jun-13 |
| G-CSF | NCT00557102 | Cetuximab and Combination Chemotherapy as First-Line Therapy in Treating Patients With Colorectal Cancer That Has Spread to the Liver                                                                                              | Completed | Colorectal Cancer Metastatic Cancer                                                                                                                                     | Biological: cetuximab Biological: filgrastim Drug: fluorouracil Drug: irinotecan hydrochloride Drug: leucovorin calcium                                                                                                                                                                                                                                                                                                                  | Tumor response rate Rate of resectability Overall and disease-free survival Tolerability                                                                                                                                                                                                                                     | Phase 2        | 24  | Sep-07    | 11-Dec-12 |
| G-CSF | NCT00016159 | Chemotherapy Plus Monoclonal Antibody in Treating Patients With Acute Promyelocytic Leukemia                                                                                                                                       | Completed | Leukemia                                                                                                                                                                | Biological: filgrastim Biological: lintuzumab Drug: arsenic trioxide Drug: idarubicin Drug: tretinoin                                                                                                                                                                                                                                                                                                                                    | reverse transcriptase-polymerase chain reaction negativity                                                                                                                                                                                                                                                                   | Phase 2        | 35  | Nov-00    | 16-Jan-13 |
| G-CSF | NCT00006390 | Alemtuzumab Plus Peripheral Stem Cell Transplantation in Treating Patients With Chronic Lymphocytic Leukemia                                                                                                                       | Completed | Leukemia                                                                                                                                                                | Biological: filgrastim Biological: cyclophosphamide Procedure: peripheral blood stem cell transplantation Radiation: Drug: bortezomib Drug: dexamethasone Drug: melphalan Drug: thalidomide Genetic: cytogenetic analysis Genetic: fluorescence in situ hybridization Other: laboratory biomarker analysis Other: questionnaire administration Procedure: autologous hematopoietic stem cell transplantation Procedure: peripheral blood |                                                                                                                                                                                                                                                                                                                              | Phase 2        |     | Feb-01    | 27-Jan-10 |
| G-CSF | NCT00792142 | Bortezomib, Thalidomide, and Dexamethasone After Melphalan and Stem Cell Transplant in Treating Patients With Stage I-III Multiple Myeloma                                                                                         | Completed | Multiple Myeloma and Plasma Cell Neoplasm Neurotoxicity                                                                                                                 | Drug: bortezomib Drug: dexamethasone Drug: melphalan Drug: thalidomide Genetic: cytogenetic analysis Genetic: fluorescence in situ hybridization Other: laboratory biomarker analysis Other: questionnaire administration Procedure: autologous hematopoietic stem cell transplantation Procedure: peripheral blood                                                                                                                      | Feasibility and toxicities of maintenance therapy Overall survival Complete response rate Duration of response 3-year progression-free survival                                                                                                                                                                              | Phase 2        | 45  | 16-Jan-08 | 23-Jan-20 |
| G-CSF | NCT00416819 | Combination Chemotherapy and Rituximab in Treating Patients With Newly Diagnosed Primary CNS Lymphoma                                                                                                                              | Completed | Brain and Central Nervous System Tumors Lymphoma                                                                                                                        | Biological: filgrastim Biological: rituximab Drug: cytarabine Drug: etoposide phosphate Drug: leucovorin calcium Drug: methotrexate Drug: temozolomide                                                                                                                                                                                                                                                                                   | rate of toxicity in patients with untreated primary CNS lymphoma Efficacy in patients with untreated primary CNS lymphoma treated with induction therapy comprising high-dose methotrexate, leucovorin calcium, rituximab, and temozolomide followed by consolidation therapy comprising cytarabine and etoposide phosphate. | Not Applicable | 10  | Sep-03    | 20-Aug-15 |
| G-CSF | NCT00238368 | Fludeoxyglucose F 18 Positron Emission Tomography in Predicting Risk of Relapse in Patients With Non-Hodgkin's Lymphoma Who Are Undergoing Combination Chemotherapy With or Without Autologous Stem Cell or Bone Marrow Transplant | Completed | Lymphoma                                                                                                                                                                | Biological: filgrastim Biological: rituximab Drug: busulfan Drug: cisplatin Drug: cyclophosphamide Drug: cytarabine Drug: doxorubicin hydrochloride Drug: etoposide Drug: methylprednisolone Drug: prednisone Drug: vincristine sulfate Procedure: autologous bone marrow transplantation Procedure: peripheral blood stem cell transplantation Procedure: positron                                                                      | 2-year event free survival Overall survival Predictive value of early negative fludeoxyglucose F 18 positron emission tomography (FDG-PET) Correlation of International Prognostic Index risk category with FDG-PET results and overall outcome                                                                              | Phase 2        | 59  | Feb-04    | 6-Nov-17  |
| G-CSF | NCT00003397 | Peripheral Stem Cell Transplantation Plus Combination Chemotherapy and Monoclonal Antibody Therapy in Treating Patients With Non-Hodgkin's Lymphoma                                                                                | Completed | Lymphoma                                                                                                                                                                | Biological: filgrastim Biological: rituximab Biological: sargramostim Drug: carmustine Drug: cisplatin Drug: cyclophosphamide Drug: dexamethasone Drug: etoposide Drug: gemcitabine hydrochloride Drug: melphalan Drug: paclitaxel Procedure: bone marrow ablation with stem cell support Procedure: peripheral blood stem                                                                                                               |                                                                                                                                                                                                                                                                                                                              | Phase 2        | 25  | Sep-98    | 4-Nov-19  |
| G-CSF | NCT00080925 | T-Cell-Depleted Allogeneic Stem Cell Transplantation After Immunoablative Induction Chemotherapy and Reduced-Intensity Transplantation Conditioning in Treating Patients With Hematologic Malignancies                             | Completed | Chronic Myeloproliferative Disorders Leukemia Lymphoma Multiple Myeloma and Plasma Cell Neoplasm Myelodysplastic Syndromes Myelodysplastic/Myeloproliferative Neoplasms | Biological: filgrastim Biological: graft-versus-tumor induction therapy Biological: rituximab Biological: therapeutic allogeneic lymphocytes Drug: cyclophosphamide Drug: cyclosporine Drug: cytarabine Drug: doxorubicin hydrochloride Drug: etoposide Drug: fludarabine phosphate Drug: prednisone Drug: vincristine sulfate Procedure: peripheral blood stem cell transplantation                                                     |                                                                                                                                                                                                                                                                                                                              | Phase 1        | 20  | Feb-04    | 8-Mar-12  |
| G-CSF | NCT00003595 | Combination Chemotherapy With or Without Monoclonal Antibody Therapy in Treating Patients With Previously Untreated HIV-Associated Non-Hodgkin's Lymphoma                                                                          | Completed | Lymphoma                                                                                                                                                                | Biological: filgrastim Biological: rituximab Drug: CHOP regimen Drug: cyclophosphamide Drug: doxorubicin hydrochloride Drug: prednisone Drug: vincristine sulfate                                                                                                                                                                                                                                                                        |                                                                                                                                                                                                                                                                                                                              | Phase 3        | 120 | Jan-99    | 8-Feb-13  |



|       |             |                                                                                                                                                                                                                 |            |                                                         |                                                                                                                                                                                                                                                                                                                                   |                                                                                                                                                                                                                                                                                                                                                                                                                                                                                                                                                                                                                                                                                                                                                                                                                                                                                                                                                                                 |                 |     |            |           |
|-------|-------------|-----------------------------------------------------------------------------------------------------------------------------------------------------------------------------------------------------------------|------------|---------------------------------------------------------|-----------------------------------------------------------------------------------------------------------------------------------------------------------------------------------------------------------------------------------------------------------------------------------------------------------------------------------|---------------------------------------------------------------------------------------------------------------------------------------------------------------------------------------------------------------------------------------------------------------------------------------------------------------------------------------------------------------------------------------------------------------------------------------------------------------------------------------------------------------------------------------------------------------------------------------------------------------------------------------------------------------------------------------------------------------------------------------------------------------------------------------------------------------------------------------------------------------------------------------------------------------------------------------------------------------------------------|-----------------|-----|------------|-----------|
| G-CSF | NCT00005589 | Combination Chemotherapy Plus Peripheral Stem Cell Transplantation With or Without Rituximab in Treating Patients With Relapsed Non-Hodgkin's Lymphoma                                                          | Completed  | Lymphoma                                                | Biological: filgrastim Biological: rituximab Drug: carmustine Drug: cyclophosphamide Drug: cytarabine Drug: etoposide Drug: melphalan Procedure: bone marrow ablation with stem cell support Procedure: peripheral blood stem cell                                                                                                | Time to disease progression Response rate and survival Molecular remission rates Safety                                                                                                                                                                                                                                                                                                                                                                                                                                                                                                                                                                                                                                                                                                                                                                                                                                                                                         | Phase 3         | 460 | Oct-99     | 17-Sep-13 |
| G-CSF | NCT00276809 | Combination Chemotherapy, Total-Body Irradiation, and Alemtuzumab in Treating Patients Undergoing an Autologous Stem Cell Transplant for Stage I, Stage II, Stage III, or Stage IV Chronic Lymphocytic Leukemia | Completed  | Chronic Lymphocytic Leukemia                            | Biological: alemtuzumab Biological: filgrastim Drug: carmustine Drug: cyclophosphamide Drug: cytarabine Drug: dexamethasone Drug: etoposide Drug: fludarabine phosphate Drug: melphalan Procedure: autologous bone marrow transplantation Procedure: peripheral blood stem cell                                                   | Safety and feasibility of CAMPATH-1H included into the myeloablative regimen (cyclophosphamide and TBI) of the CLL3 protocol monitoring of treatment related mortality and morbidity (CTC scale) continuous Rate and duration of molecular responses MRD levels continuous Rate and duration of clinical remissions NCIE sponsored remission criteria for CLL continuous Overall survival time from treatment to death continuous                                                                                                                                                                                                                                                                                                                                                                                                                                                                                                                                               | Phase 2         | 30  | Jun-01     | 26-Sep-16 |
| G-CSF | NCT00217503 | Bortezomib and Antiviral Therapy Followed By Effusion Drainage, Bevacizumab, and Combination Chemotherapy in Treating Patients With Primary Effusion Lymphoma                                                   | Completed  | Lymphoma                                                | Biological: bevacizumab Biological: filgrastim Biological: pegfilgrastim Drug: bortezomib Drug: cyclophosphamide Drug: doxorubicin hydrochloride Drug: etoposide Drug: ganciclovir Drug:                                                                                                                                          | Response to therapy as measured by overall, disease-free, and progression-free survival each month Effects of high-dose zidovudine and ganciclovir on tumor cells measured by various assays after 2 weeks of study treatment                                                                                                                                                                                                                                                                                                                                                                                                                                                                                                                                                                                                                                                                                                                                                   | Phase 2         | 15  | Jul-05     | 20-Jun-13 |
| G-CSF | NCT00281983 | Fludarabine and Cyclophosphamide in Treating Patients Who Are Undergoing Donor Stem Cell Transplant for Chronic Lymphocytic Leukemia or Waldenström's Macroglobulinemia                                         | Completed  | Chronic Lymphocytic Leukemia                            | Biological: alemtuzumab Biological: anti-thymocyte globulin Biological: filgrastim Biological: rituximab Biological: therapeutic allogeneic lymphocytes Drug: busulfan Drug: cyclophosphamide Drug: cyclosporine Drug: fludarabine phosphate Drug: methotrexate Drug: mycophenolate mofetil Procedure: peripheral blood stem cell | Feasibility as measured by the proportion of eligible patients completing the transplant procedure successfully Safety as measured by a treatment-related mortality of < 25% at 2 years following transplant Clinical remission rate by NIH criteria at 12 months following transplant Minimal residual disease negativity rate as measured by high-resolution flow or CDR PCR at 12 months following transplant Chimerism as measured by STR-PCR at 12 months following transplant Event-free and overall survival at 5 years following transplant                                                                                                                                                                                                                                                                                                                                                                                                                             | Phase 1 Phase 2 | 100 | Jun-00     | 24-Jul-17 |
| G-CSF | NCT00147121 | Rituximab+Standard CHOP vs Rituximab+Bi-weekly CHOP for Untreated Stage III/IV Low-grade B-cell Lymphoma (JCOG0203)                                                                                             | Completed  | Lymphoma, B-Cell                                        | Drug: Rituximab + Standard CHOP Drug: Rituximab + Bi-weekly CHOP                                                                                                                                                                                                                                                                  | CR rate (phase II) PFS (phase III) ORR, PFS, OS, Safety (phase II) OS, Safety (phase III)                                                                                                                                                                                                                                                                                                                                                                                                                                                                                                                                                                                                                                                                                                                                                                                                                                                                                       | Phase 2 Phase 3 | 300 | Sep-02     | 22-Sep-16 |
| G-CSF | NCT02104427 | PD and Safety of TG-0054 Combined With G-CSF in Multiple Myeloma, Non-Hodgkin Lymphoma and Hodgkin Disease Patients                                                                                             | Completed  | Multiple Myeloma Non-Hodgkin Lymphoma Hodgkin Disease   | Drug: TG-0054 combined with G-CSF                                                                                                                                                                                                                                                                                                 | Proportion of Patients From Whom a Total Number of CD34+ Cells $\geq 5.0 \times 10^6$ Cells/kg Was Collected Within the First 4 Leukapheresis Sessions Proportion of Patients From Whom a Total Number of CD34+ Cells $\geq 2.5 \times 10^6$ Cells/kg Was Collected Within the First 4 Leukapheresis Sessions Proportion of Patients Who Mobilized the Targeted Total Number of CD34+ Cells ( $\geq 6.0 \times 10^6$ Cells/kg) Within 5 Leukapheresis Sessions the Pharmacodynamics (PD) Following Treatment With TG-0054 When Combined With G-                                                                                                                                                                                                                                                                                                                                                                                                                                 | Phase 2         | 12  | Feb-15     | 13-Dec-17 |
| G-CSF | NCT00901225 | Study of Plerixafor for Rescue of Poor Mobilizers in Autologous Stem Cell Transplant                                                                                                                            | Completed  | Multiple Myeloma Non-Hodgkins Lymphoma Hodgkins Disease | Drug: G-CSF plus Plerixafor                                                                                                                                                                                                                                                                                                       | Number of Participants Who Achieved > or Equal to $2 \times 10^6$ CD34+ Cells/kg Within 3 Days of Apheresis After Receiving Plerixafor With G-CSF. Number of Participants Experiencing a Grade III/IV Toxicity Number of Subjects Experiencing Graft Failure Days to Absolute Neutrophil Count >500 Number of Subjects Experiencing Durability of                                                                                                                                                                                                                                                                                                                                                                                                                                                                                                                                                                                                                               | Phase 2         | 21  | May-09     | 7-May-14  |
| G-CSF | NCT00396266 | AMD3100 (Plerixafor) Given to NHL and MM Patients to Increase the Number of PBSCs When Given a Mobilizing Regimen of G-CSF                                                                                      | Completed  | Multiple Myeloma Lymphoma, Non-Hodgkin                  | Drug: G-CSF Plus Plerixafor                                                                                                                                                                                                                                                                                                       | Number of Participants in Overall Safety Summary of Treatment Emergent Adverse Events (TEAE) Number of Participants Who Had a $\geq 2$ -fold Increase in Circulating CD34+ Cells Number of Transplants Resulting In Polymorphonuclear Leukocyte (PMN) Engraftment by Day 12 But No Later Than Day 21 Post-Transplant Tumor Cell Mobilization in Non-Hodgkin's Lymphoma (NHL) Participants Following Plerixafor Treatment Single-dose Maximum Observed Concentration of Plerixafor (Cmax) Single-dose Time to Maximum Concentration of Plerixafor (Tmax) Single-dose Half-life of Plerixafor (T1/2) Single-dose Area Under the Concentration-time Curve of Plerixafor From Time 0 to 10 Hours Post-dose (AUC0-10) Single-dose Apparent Clearance of Plerixafor (CL/F) Single-dose Apparent Volume of Distribution of Plerixafor (Vz/F) in NHL and MM Patients Maximum Fold Increase in Peripheral Blood CD34+ Cells From Baseline Following Initial Administration of Plerixafor | Phase 2         | 22  | Jan-05     | 7-Mar-14  |
| G-CSF | NCT00395967 | AMD3100 (Plerixafor) in Multiple Myeloma (MM) or Non-Hodgkin's Lymphoma (NHL) Patients Predicted to be Unable to Mobilize With G-CSF Alone                                                                      | Terminated | Multiple Myeloma Lymphoma, Non-Hodgkin's                | Drug: G-CSF plus plerixafor                                                                                                                                                                                                                                                                                                       | Number of Patients Who Achieved $\geq 2 \times 10^6$ CD34+ Cells/kg Following Treatment With Plerixafor 240 $\mu$ g/kg and G-CSF for up to 3 Consecutive Days Overall Participants Counts of Adverse Events The Fold Increase in Peripheral Blood CD34+ Cells Following the First Dose of Plerixafor Number of Days to Polymorphonuclear Leukocyte (PMN) Engraftment Number of Days to Platelet (PLT) Engraftment Graft Durability at 12 Months After Transplantation                                                                                                                                                                                                                                                                                                                                                                                                                                                                                                           | Phase 2         | 5   | April 2005 | 1-May-15  |

|       |             |                                                                                                                                                                                                      |            |                                                   |                                                         |                                                                                                                                                                                                                                                                                                                                                                                                                                                                                                                                                                                                                                                                                                                                                                                                                                                                                                                                                                                                                                                                                                                                                                                                          |         |     |            |           |
|-------|-------------|------------------------------------------------------------------------------------------------------------------------------------------------------------------------------------------------------|------------|---------------------------------------------------|---------------------------------------------------------|----------------------------------------------------------------------------------------------------------------------------------------------------------------------------------------------------------------------------------------------------------------------------------------------------------------------------------------------------------------------------------------------------------------------------------------------------------------------------------------------------------------------------------------------------------------------------------------------------------------------------------------------------------------------------------------------------------------------------------------------------------------------------------------------------------------------------------------------------------------------------------------------------------------------------------------------------------------------------------------------------------------------------------------------------------------------------------------------------------------------------------------------------------------------------------------------------------|---------|-----|------------|-----------|
| G-CSF | NCT00322491 | Mobilization of Stem Cells With AMD3100 (Plerixafor) and G-CSF in Non-Hodgkin's Lymphoma and Multiple Myeloma Patients                                                                               | Completed  | Lymphoma, Non-Hodgkin Multiple Myeloma            | Drug: G-CSF Plus Plerixafor                             | Number of Participants in Overall Safety Summary of Treatment Emergent Adverse Events (TEAE) Number of Participants Achieving a Two-Fold (Relative) Increase in Peripheral Blood (PB) CD34+ Cells/ $\mu$ L Following the First Dose of Plerixafor Number of Transplants in Which Participants Achieved Polymorphonuclear Leukocyte (PMN) Engraftment by Day 12 But No Later Than Day 21 Post Peripheral Blood Stem Cell (PBSC) Transplant                                                                                                                                                                                                                                                                                                                                                                                                                                                                                                                                                                                                                                                                                                                                                                | Phase 2 | 49  | Mar-04     | 13-Mar-14 |
| G-CSF | NCT00322387 | Mobilization of Stem Cells With Plerixafor, Chemotherapy and G-CSF in Multiple Myeloma or Non-Hodgkin's Lymphoma Patients                                                                            | Completed  | Lymphoma, Non-Hodgkin Multiple Myeloma            | Drug: G-CSF and plerixafor                              | Overall Participant Counts of Adverse Events (AEs) Up to Twelve Months Post Transplant Fold (i.e., Relative) Increase in Peripheral Blood (PB) CD34+ Cells/ $\mu$ L Number of Transplants in Which Participants Achieved Polymorphonuclear Leukocyte (PMN) Engraftment by Day 12 But No Later Than Day 21 Post Peripheral Blood Stem Cell                                                                                                                                                                                                                                                                                                                                                                                                                                                                                                                                                                                                                                                                                                                                                                                                                                                                | Phase 2 | 40  | April 2004 | 13-Mar-14 |
| G-CSF | NCT02469116 | Carboplatin Plus Docetaxel With Day 2 Pegylated G-CSF (Neulasta®) in Patients With Advanced Stage                                                                                                    | Terminated | Ovarian Cancer                                    | Drug: Docetaxel Drug: Carboplatin Drug: Pegylated G-CSF | Incidence of Grade 3-4 Neutropenia as Measured by CTCAE Version 3 Efficacy of Regimen as Measured by CA-125 Response Time to Progression (TTP) Overall Survival (OS) Progression-free Survival (PFS) Quality of Life (QoL) as Measured by FACT-O                                                                                                                                                                                                                                                                                                                                                                                                                                                                                                                                                                                                                                                                                                                                                                                                                                                                                                                                                         | Phase 2 | 18  | Jan-06     | 19-Aug-16 |
| G-CSF | NCT00396201 | AMD3100 (Plerixafor) Added to a Mobilizing Regimen of Granulocyte-colony Stimulating Factor (G-CSF) to Increase the Number of Peripheral Blood Stem Cells (PBSCs) in Patients With Hodgkin's Disease | Completed  | Hodgkin's Disease                                 | Drug: G-CSF Plus Plerixafor                             | Proportion of Participants Who Achieved $\geq 5 \times 10^6$ CD34+ Cells/kg Following Treatment With Plerixafor and G-CSF Overall Participant Counts of Adverse Events During the Treatment Period Proportion of Participants Who Achieved $\geq 2 \times 10^6$ CD34+ Cells/kg Following Treatment With Plerixafor and G-CSF Fold (Relative) Increase in Peripheral Blood (PB) CD34+ Cells/ $\mu$ L Participant Counts Grouped by Number of Apheresis Days Required to Collect $\geq 5 \times 10^6$ CD34+ Cells/kg Number of Days Post-Transplantation to Polymorphonuclear Leukocyte (PMN) Engraftment Number of Days Post Transplantation to Platelet (PLT) Engraftment Number of Participants With a Durable Graft at 12 Months Maximum Plasma Concentration (Cmax) Following a Single Dose of Plerixafor Time to Maximum Plasma Concentration (Tmax) Following a Single Dose of Plerixafor Half-life (T1/2) Following a Single Dose of Plerixafor Area Under the Plasma Concentration-time Curve From 0 to 10 Hours (AUC0-10) Following a Single Dose of Plerixafor Apparent Clearance (CL/F) of Single-dose Plerixafor Apparent Volume of Distribution (Vz/F) Following a Single-dose of Plerixafor | Phase 2 | 22  | Nov-04     | 13-Mar-14 |
| G-CSF | NCT00444912 | The Effect of Rituximab on Mobilization With AMD3100 (Plerixafor) Plus G-CSF in Patients With Relapsed or Refractory Non-Hodgkin Lymphoma (NHL) or Hodgkin Disease (HD)                              | Completed  | Non-Hodgkin Lymphoma Hodgkin Disease              | Drug: G-CSF plus plerixafor Biological: rituximab       | Summary of Adverse Events (AEs) Median Cumulative Number of CD34+ Cells Collected During Apheresis Median Fold Increase in the Number of CD34+ Cells After Plerixafor Administration Median Number of Apheresis Days Required to Reach a Minimum of $3 \times 10^6$ CD34+ Cells/kg Median Number of Apheresis Days Required to Reach the Target of $5 \times 10^6$ CD34+ Cells/kg Median Number of Days to Polymorphonuclear Leukocyte (PMN) Engraftment Median Number of Days to Platelet (PLT) Engraftment Median Number of Days to Lymphocyte Engraftment Median Level of CD19+CD2-CD14- B-cells Six Months Post-Transplant Median Level of CD19+CD2-CD14- B-cells Twelve Months Post-Transplant The Percentage of CD19+CD3-CD14- B-cells of the Total Cells on the First Apheresis Day Number of Participants With Durable Engraftment 12 Months After Transplantation                                                                                                                                                                                                                                                                                                                               | Phase 2 | 30  | Feb-06     | 13-Mar-14 |
| G-CSF | NCT01519700 | Phase III Study Comparing the Efficacy and Safety of EP2006 and Filgrastim                                                                                                                           | Completed  | Chemotherapy Associated Neutropenia Breast Cancer | Drug: EP2006 Drug: Filgrastim                           | Mean Duration of Grade 4 Neutropenia During Cycle 1 of Chemotherapy Incidence of Febrile Neutropenia Number of Days of Fever Depth of Absolute Neutrophil Count Nadir Time to Absolute Neutrophil Count Recovery Frequency of Infections Incidence of Hospitalizations Due to Febrile Neutropenia                                                                                                                                                                                                                                                                                                                                                                                                                                                                                                                                                                                                                                                                                                                                                                                                                                                                                                        | Phase 3 | 218 | Dec-11     | 6-May-15  |
| G-CSF | NCT00322842 | Treatment With AMD3100 (Plerixafor) in Non-Hodgkin's Lymphoma and Multiple Myeloma Patients                                                                                                          | Completed  | Lymphoma, Non-Hodgkin Multiple Myeloma            | Drug: G-CSF Plus Plerixafor                             | Number of Participants in Overall Safety Summary of Treatment Emergent Adverse Events (TEAE) Fold (i.e., Relative) Increase in Peripheral Blood (PB) CD34+ Cells/ $\mu$ L After First Dose of Plerixafor Number of Transplants in Which Participants Achieved Polymorphonuclear Leukocyte (PMN) Engraftment by Day 12 But No Later Than Day 21 Post Peripheral Blood Stem Cell (PBSC) Transplant Increase in Peripheral Blood (PB) CD34+ Cells From Steady-state Hematopoiesis to Pre-leukapheresis in G-CSF+Plerixafor Treated Participants Compared to Historical Controls Treated With G-CSF Alone or                                                                                                                                                                                                                                                                                                                                                                                                                                                                                                                                                                                                 | Phase 2 | 35  | Sep-04     | 13-Mar-14 |
| G-CSF | NCT01301963 | Filgrastim With or Without Plerixafor in Treating Patients With Multiple Myeloma Previously Treated With Lenalidomide                                                                                | Terminated | Refractory Multiple Myeloma                       | Drug: plerixafor Biological: filgrastim                 | Ability to Reach Target Collection of $5 \times 10^6$ CD34+ Cells/kg Percentage of Patients Achieving Target Goal CD34+ Cells Dose Compare Hematopoietic Stem Cells/kg Collections Between Different Mobilization Regimens in Those Patients Who Are Crossed Over From One Mobilization Regimen to the Other Compare Days of Apheresis Between Mobilization Groups Compare Need for Hospitalization During Mobilization Between Mobilization Groups Compare Need for Remobilization Between Mobilization Groups                                                                                                                                                                                                                                                                                                                                                                                                                                                                                                                                                                                                                                                                                          | Phase 3 | 9   | Jul-11     | 6-Aug-14  |

|       |             |                                                                                                                                                                                          |            |                                                                                                                                                                                                                                                                                                                                                                                                                                                                                                               |                                                                                                                                               |                                                                                                                                                                                                                                                                                                                                                                                                                                                                                                                                                                                                                                                                                                                                                        |                 |     |        |           |
|-------|-------------|------------------------------------------------------------------------------------------------------------------------------------------------------------------------------------------|------------|---------------------------------------------------------------------------------------------------------------------------------------------------------------------------------------------------------------------------------------------------------------------------------------------------------------------------------------------------------------------------------------------------------------------------------------------------------------------------------------------------------------|-----------------------------------------------------------------------------------------------------------------------------------------------|--------------------------------------------------------------------------------------------------------------------------------------------------------------------------------------------------------------------------------------------------------------------------------------------------------------------------------------------------------------------------------------------------------------------------------------------------------------------------------------------------------------------------------------------------------------------------------------------------------------------------------------------------------------------------------------------------------------------------------------------------------|-----------------|-----|--------|-----------|
| G-CSF | NCT00450450 | Donor Bone Marrow Transplant With or Without G-CSF in Treating Young Patients With Hematologic Cancer or Other Diseases                                                                  | Terminated | Childhood Acute Lymphoblastic Leukemia in Remission Childhood Acute Myeloid Leukemia in Remission Childhood Chronic Myelogenous Leukemia Childhood Myelodysplastic Syndromes Chronic Phase Chronic Myelogenous Leukemia de Novo Myelodysplastic Syndromes Juvenile Myelomonocytic Leukemia Previously Treated Myelodysplastic Syndromes Recurrent Childhood Acute Lymphoblastic Leukemia Secondary Myelodysplastic Syndromes                                                                                  | Procedure: allogeneic bone marrow transplantation Other: laboratory biomarker analysis Biological: filgrastim                                 | Estimated Two-year Event-free Survival (EFS) Estimated Graft Failure Rate Estimated Incidence of Grade III-IV Acute Graft-versus-host Disease (aGVHD) Estimated 100-day Transplant Related Mortality (TRM) Percentage Estimated Percentage of Chronic Graft-versus-host Disease (cGVHD) Estimated Median Time to Neutrophil Engraftment Estimated Median Length of Initial Hospitalization                                                                                                                                                                                                                                                                                                                                                             | Phase 3         | 27  | Dec-07 | 9-May-17  |
| G-CSF | NCT00103662 | Mobilization of Stem Cells With AMD3100 (Plerixafor) in Multiple Myeloma Patients                                                                                                        | Completed  | Multiple Myeloma                                                                                                                                                                                                                                                                                                                                                                                                                                                                                              | Drug: Granulocyte colony-stimulating factor plus plerixafor Drug: Granulocyte colony-stimulating factor plus placebo                          | Proportion of Participants Achieving a Target of $\geq 6 \times 10^6$ CD34+ Cells/kg in 2 or Fewer Days of Apheresis. Number of Participants With Adverse Events Proportion of Participants Achieving a Target of $\geq 6 \times 10^6$ CD34+ Cells/kg in 4 or Fewer Days of Apheresis. Proportion of Participants Achieving a Target of $\geq 2 \times 10^6$ CD34+ Cells/kg in 4 or Fewer Days of Apheresis. Median Number of Days to $\geq 6 \times 10^6$ CD34+ Cells/kg Median Number of Days to Polymorphonuclear (PMN) Cell Engraftment Median Number of Days to Platelet (PLT) Engraftment Graft Durability at 100 Days Post Transplantation Graft Durability at 6 Months Post Transplantation Graft Durability at 12 Months Post Transplantation | Phase 3         | 302 | Jan-05 | 13-Mar-14 |
| G-CSF | NCT01095757 | Evaluation of the Drug Plerixafor in Combination With Chemotherapy and G-CSF for Stem Cell Collection                                                                                    | Completed  | Myeloma Lymphoma                                                                                                                                                                                                                                                                                                                                                                                                                                                                                              | Drug: Plerixafor                                                                                                                              | Patients Achieving Greater Than or Equal to $5 \times 10^6$ of CD34+ Cells/kg in a Single Day of Apheresis Patients Achieving $\geq 3 \times 10^6$ CD34+ Cell/Kg Average Number of Days for Engraftment (Engraftment Defined as Absolute Neutrophil Count $\geq 500$ )                                                                                                                                                                                                                                                                                                                                                                                                                                                                                 | Phase 2         | 45  | Mar-10 | 29-Sep-14 |
| G-CSF | NCT00103610 | Mobilization of Stem Cells With AMD3100 (Plerixafor) in Non-Hodgkin's Lymphoma Patients                                                                                                  | Completed  | Lymphoma, Non-Hodgkin                                                                                                                                                                                                                                                                                                                                                                                                                                                                                         | Drug: Granulocyte colony-stimulating factor plus plerixafor Drug: Granulocyte colony-stimulating factor plus placebo                          | Proportion of Participants Able to Achieve Target ( $\geq 5 \times 10^6$ CD34+ Cells/kg) in 4 or Fewer Days of Apheresis Number of Participants With Adverse Events Proportion of Participants Able to Achieve Target ( $\geq 2 \times 10^6$ CD34+ Cells/kg) in 4 or Fewer Days of Apheresis Median Number of Days of Apheresis Required to Achieve $\geq 5 \times 10^6$ CD34+ Cells/kg Median Number of Days to Polymorphonuclear (PMN) Cell Engraftment Median Number of Days to Platelet (PLT) Engraftment Graft Durability at 100 Days Post Transplantation Graft Durability at 6 Months Post Transplantation Graft Durability at 12                                                                                                               | Phase 3         | 298 | Jan-05 | 13-Mar-14 |
| G-CSF | NCT00499343 | G-CSF Versus G-CSF Plus GM-CSF for Stem Cell Mobilization in NHL Patients                                                                                                                | Completed  | Lymphoma                                                                                                                                                                                                                                                                                                                                                                                                                                                                                                      | Drug: Etoposide Drug: G-CSF Drug: GM-CSF Drug: Isophosphamide Drug: Rituximab Procedure: Apheresis                                            | CD34+ Cells/kg in Blood Stem Cells                                                                                                                                                                                                                                                                                                                                                                                                                                                                                                                                                                                                                                                                                                                     | Phase 2         | 84  | Jan-04 | 2-Aug-13  |
| G-CSF | NCT00169104 | Effects of Granulocyte Colony-stimulating Factor (G-CSF), Trastuzumab, and Vinorelbine on Immune Cell Function                                                                           | Terminated | Metastatic Breast Cancer                                                                                                                                                                                                                                                                                                                                                                                                                                                                                      | Drug: G-CSF Drug: trastuzumab Drug: vinorelbine Drug: saline placebo                                                                          | Antibody Dependent Cell-mediated Cytotoxicity of Effector Cells Isolated From Subjects Receiving Trastuzumab With Either G-CSF or a Saline Placebo Against a Her-2 Overexpressing Target in Vitro Antibody Dependent Cell-mediated Cytotoxicity of Effector Cells Isolated From Subjects Receiving Chemotherapy, Trastuzumab, and G-CSF Against a Her-2 Overexpressing Target in Vitro Clinical Response Rate of the Combination of Trastuzumab, G-CSF, and Vinorelbine in Subjects With Her-2 Overexpressing Metastatic Breast Cancer Safety of the Combination of Trastuzumab, G-CSF, and Vinorelbine in                                                                                                                                             | Phase 2 Phase 3 | 23  | Jul-02 | 20-Jul-18 |
| G-CSF | NCT00822770 | Plerixafor and Granulocyte Colony-stimulating Factor (G-CSF) With Busulfan, Fludarabine and Thymoglobulin                                                                                | Completed  | Stem Cell Transplantation Leukemia                                                                                                                                                                                                                                                                                                                                                                                                                                                                            | Drug: Plerixafor Drug: Filgrastim Drug: Fludarabine Drug: Busulfan Procedure: Allogeneic blood stem cell transplant Drug: ATG (Thymoglobulin) | Maximum Tolerated Dose (MTD) Plerixafor Time to Failure Response Rate (Engraftment Versus Graft Failure)                                                                                                                                                                                                                                                                                                                                                                                                                                                                                                                                                                                                                                               | Phase 1 Phase 2 | 47  | Jan-09 | 16-Jul-14 |
| G-CSF | NCT01101880 | Clofarabine, Cytarabine, and Filgrastim in Treating Patients With Newly Diagnosed Acute Myeloid Leukemia, Advanced Myelodysplastic Syndrome, and/or Advanced Myeloproliferative Neoplasm | Completed  | Adult Acute Myeloid Leukemia With 11q23 (MLL) Abnormalities Adult Acute Myeloid Leukemia With Del(5q) Adult Acute Myeloid Leukemia With Inv(16)(p13;q22) Adult Acute Myeloid Leukemia With t(15;17)(q22;q12) Adult Acute Myeloid Leukemia With t(16;16)(p13;q22) Adult Acute Myeloid Leukemia With t(8;21)(q22;q22) Chronic Myelomonocytic Leukemia de Novo Myelodysplastic Syndromes Refractory Anemia With Excess Blasts Untreated Adult Acute Myeloid Leukemia Myeloproliferative Neoplasm With 10% Blasts | Biological: filgrastim Drug: clofarabine Drug: cytarabine                                                                                     | Rates of Complete Remission and Complete Remission With Incomplete Recovery of Counts Duration of Remission Time to Progression Event Free Survival Treatment-related Mortality (TRM) Overall Survival                                                                                                                                                                                                                                                                                                                                                                                                                                                                                                                                                 | Phase 2         | 50  | Aug-10 | 19-Oct-17 |

|       |             |                                                                                                                                                                                                            |            |                                                                                                                                                                                                                                                                                                                                                                                                                                                                                                                                                                                                                                                                                                                                                                                                                                                                                                                                                                                                                                                                                                                                                                                                                                                                                                                                                                                                                                                                                                                                                               |                                                                                                                                                             |                                                                                                                                                                                                                                                                                                                                                                                                                                                                                                                                                                                                                                                                                                                                                                                                                                                                                                                                             |                 |     |           |                |
|-------|-------------|------------------------------------------------------------------------------------------------------------------------------------------------------------------------------------------------------------|------------|---------------------------------------------------------------------------------------------------------------------------------------------------------------------------------------------------------------------------------------------------------------------------------------------------------------------------------------------------------------------------------------------------------------------------------------------------------------------------------------------------------------------------------------------------------------------------------------------------------------------------------------------------------------------------------------------------------------------------------------------------------------------------------------------------------------------------------------------------------------------------------------------------------------------------------------------------------------------------------------------------------------------------------------------------------------------------------------------------------------------------------------------------------------------------------------------------------------------------------------------------------------------------------------------------------------------------------------------------------------------------------------------------------------------------------------------------------------------------------------------------------------------------------------------------------------|-------------------------------------------------------------------------------------------------------------------------------------------------------------|---------------------------------------------------------------------------------------------------------------------------------------------------------------------------------------------------------------------------------------------------------------------------------------------------------------------------------------------------------------------------------------------------------------------------------------------------------------------------------------------------------------------------------------------------------------------------------------------------------------------------------------------------------------------------------------------------------------------------------------------------------------------------------------------------------------------------------------------------------------------------------------------------------------------------------------------|-----------------|-----|-----------|----------------|
| G-CSF | NCT01076270 | Plerixafor and Filgrastim For Mobilization of Donor Peripheral Blood Stem Cells Before A Donor Peripheral Blood Stem Cell Transplant in Treating Patients With Hematologic Malignancies                    | Terminated | Accelerated Phase Chronic Myelogenous Leukemia Adult Acute Lymphoblastic Leukemia in Remission Adult Acute Myeloid Leukemia in Remission Adult Acute Myeloid Leukemia With 11q23 (MLL) Abnormalities Adult Acute Myeloid Leukemia With Inv(16)(p13;q22) Adult Acute Myeloid Leukemia With t(15;17)(q22;q12) Adult Acute Myeloid Leukemia With t(16;16)(p13;q22) Adult Acute Myeloid Leukemia With t(8;21)(q22;q22) Atypical Chronic Myeloid Leukemia, BCR-ABL Negative Blastic Phase Chronic Myelogenous Leukemia Chronic Phase Chronic Myelogenous Leukemia de Novo Myelodysplastic Syndromes Extranodal Marginal Zone B-cell Lymphoma of Mucosa-associated Lymphoid Tissue Myelodysplastic/Myeloproliferative Neoplasm, Unclassifiable Nodal Marginal Zone B-cell Lymphoma Noncontiguous Stage II Adult Burkitt Lymphoma Noncontiguous Stage II Adult Diffuse Large Cell Lymphoma Noncontiguous Stage II Adult Diffuse Mixed Cell Lymphoma Noncontiguous Stage II Adult Diffuse Small Cleaved Cell Lymphoma Noncontiguous Stage II Adult Immunoblastic Large Cell Lymphoma Noncontiguous Stage II Adult Lymphoblastic Lymphoma Noncontiguous Stage II Grade 1 Follicular Lymphoma Noncontiguous Stage II Grade 2 Follicular Lymphoma Noncontiguous Stage II Grade 3 Follicular Lymphoma Noncontiguous Stage II Mantle Cell Lymphoma Noncontiguous Stage II Marginal Zone Lymphoma Noncontiguous Stage II Small Lymphocytic Lymphoma Previously Treated Myelodysplastic Syndromes Recurrent Adult Acute Lymphoblastic Leukemia Recurrent Adult Acute Myeloid | Drug: plerixafor Biological: filgrastim Procedure: peripheral blood stem cell transplantation Procedure: allogeneic hematopoietic stem cell transplantation | Successful Collection of Stem Cells CD34-positive Cells Collected                                                                                                                                                                                                                                                                                                                                                                                                                                                                                                                                                                                                                                                                                                                                                                                                                                                                           | Not Applicable  | 1   | Jun-10    | 28-Jun-17      |
| G-CSF | NCT00588094 | Dose Augmented Rituximab and ICE for Pts With Primary Refractory and Poor Risk Relapsed Aggressive B-                                                                                                      | Completed  | Lymphoma B-cell Non-Hodgkin's Lymphoma                                                                                                                                                                                                                                                                                                                                                                                                                                                                                                                                                                                                                                                                                                                                                                                                                                                                                                                                                                                                                                                                                                                                                                                                                                                                                                                                                                                                                                                                                                                        | Drug: Rituximab, Ifosfamide, Carboplatin, VP-16, Mesna, G-CSF, Stem Cell Transplant                                                                         | Improve the Overall Response Rate                                                                                                                                                                                                                                                                                                                                                                                                                                                                                                                                                                                                                                                                                                                                                                                                                                                                                                           | Phase 2         | 20  | Oct-03    | 4-Dec-15       |
| G-CSF | NCT00602225 | Clofarabine, Cytarabine, and G-CSF in Treating Patients With Relapsed or Refractory Acute Myeloid Leukemia                                                                                                 | Completed  | Acute Myeloid Leukemia Adult Acute Myeloid Leukemia With 11q23 (MLL) Abnormalities Adult Acute Myeloid Leukemia With Inv(16)(p13;q22) Adult Acute Myeloid Leukemia With t(15;17)(q22;q12) Adult Acute Myeloid Leukemia With t(16;16)(p13;q22) Adult Acute Myeloid Leukemia With t(8;21)(q22;q22) Adult Acute Promyelocytic Leukemia (M3) Recurrent Adult Acute                                                                                                                                                                                                                                                                                                                                                                                                                                                                                                                                                                                                                                                                                                                                                                                                                                                                                                                                                                                                                                                                                                                                                                                                | Drug: clofarabine Drug: cytarabine Biological: filgrastim                                                                                                   | Maximum Tolerated Dose of Clofarabine Dose-limiting Toxicity as Assessed by NCI CTCAE v3.0 Response Rates by Cytogenetic Risk Category Response Rates by Cytogenetic Risk Category and Clofarabine Dose Response Rates by Duration First Complete Remission (CR1) Response Rates by Salvage Number Hematologic and Non-hematologic Side Effect Profile Efficacy Disease-free Survival Overall Survival                                                                                                                                                                                                                                                                                                                                                                                                                                                                                                                                      | Phase 1 Phase 2 | 50  | Dec-07    | 9-Mar-18       |
| G-CSF | NCT03042780 | FOLFIRINOX in Metastatic High Grade Gastroenteropancreatic Neuroendocrine Carcinomas                                                                                                                       | Terminated | Gastro-enteropancreatic Neuroendocrine Tumor Pancreatic Cancer Neuroendocrine Carcinomas of Pancreas Islet Cell Carcinoma                                                                                                                                                                                                                                                                                                                                                                                                                                                                                                                                                                                                                                                                                                                                                                                                                                                                                                                                                                                                                                                                                                                                                                                                                                                                                                                                                                                                                                     | Drug: FOLFIRINOX Drug: Granulocyte colony-stimulating factor (G-CSF)                                                                                        | Objective Radiographic Response Rate (ORR) Progression Free Survival (PFS)                                                                                                                                                                                                                                                                                                                                                                                                                                                                                                                                                                                                                                                                                                                                                                                                                                                                  | Phase 2         | 2   | 1-Feb-17  | 3-Jan-20       |
| G-CSF | NCT02098109 | Non-inferiority Study of XM02 Filgrastim (Granix) and Filgrastim (Neupogen) in Combination With Plerixafor for Autologous Stem Cell Mobilization in Patients With Multiple Myeloma or Non-Hodgkin Lymphoma | Completed  | Multiple Myeloma Lymphoma, Non-Hodgkin                                                                                                                                                                                                                                                                                                                                                                                                                                                                                                                                                                                                                                                                                                                                                                                                                                                                                                                                                                                                                                                                                                                                                                                                                                                                                                                                                                                                                                                                                                                        | Drug: XM02 Filgrastim Drug: Filgrastim Procedure: Apheresis Drug: Plerixafor Procedure: Stem Cell Transplant                                                | Comparison of the Mean Day 5 CD34+Cells/kg Yield Between the Two Arms Comparison of the Most Commonly Reported Adverse Events (Safety) Experienced by Participants Between the Two Arms Comparison of the Time to Neutrophil Engraftment Between the Two Arms Comparison of the Time to Platelet Engraftment Between the Two Arms Comparison of the Readmission Rate Between the Two Arms Comparison of the Percentage of Patients Who Collect > 2.0x10 <sup>6</sup> CD34+Cells/kg Following PBSC Mobilization Between the Two Arms Comparison of the Percentage of Patients Who Collect > 5.0x10 <sup>6</sup> CD34+Cells/kg Following PBSC Mobilization Between the Two Arms Comparison of the Percentage of Patients Who Collect > 2.0x10 <sup>6</sup> CD34+Cells/kg in One Apheresis Procedure Following PBSC Mobilization Between the Two Arms Comparison of the Percentage of Patients Who Collect > 5.0x10 <sup>6</sup> CD34+Cells/kg | Phase 2         | 100 | 20-Aug-14 | 18-Jul-17      |
| G-CSF | NCT00258180 | Cyclophosphamide in Treating Young Patients With Severe Autoimmune Enteropathy                                                                                                                             | Completed  | Diarrhea Gastrointestinal Complications Unspecified Childhood Solid Tumor, Protocol Specific                                                                                                                                                                                                                                                                                                                                                                                                                                                                                                                                                                                                                                                                                                                                                                                                                                                                                                                                                                                                                                                                                                                                                                                                                                                                                                                                                                                                                                                                  | Biological: filgrastim Drug: cyclophosphamide                                                                                                               | Number of Participants With Treatment-free Remission at 1 Year After Study Completion Number of Participants Experiencing Intervention-related Adverse Events, as Defined by CTCAE at 1 Month                                                                                                                                                                                                                                                                                                                                                                                                                                                                                                                                                                                                                                                                                                                                               | Phase 2         | 3   | 15-Aug-05 | April 16, 2019 |

|       |             |                                                                                                                                                                                                   |            |                                                                                                                                                                                                                         |                                                                                                                                     |                                                                                                                                                                                                                                                                                                                                                                                                                                                                                                                                                                                                                                                                                                                                                                                                                                                                                                                                                |                 |     |           |               |
|-------|-------------|---------------------------------------------------------------------------------------------------------------------------------------------------------------------------------------------------|------------|-------------------------------------------------------------------------------------------------------------------------------------------------------------------------------------------------------------------------|-------------------------------------------------------------------------------------------------------------------------------------|------------------------------------------------------------------------------------------------------------------------------------------------------------------------------------------------------------------------------------------------------------------------------------------------------------------------------------------------------------------------------------------------------------------------------------------------------------------------------------------------------------------------------------------------------------------------------------------------------------------------------------------------------------------------------------------------------------------------------------------------------------------------------------------------------------------------------------------------------------------------------------------------------------------------------------------------|-----------------|-----|-----------|---------------|
| G-CSF | NCT00906945 | Chemosensitization With Plerixafor Plus G-CSF in Acute Myeloid Leukemia                                                                                                                           | Completed  | Leukemia, Myeloid, Acute                                                                                                                                                                                                | Drug: G-CSF Drug: Plerixafor Drug: Mitoxantrone Drug: Etoposide Drug: Cytarabine                                                    | Phase I: Maximum Tolerated Dose of Plerixafor Plus G-CSF When Combined With MEC Phase II: Complete Response Rate (CR+CRi) Phase I and Phase II: Safety and Tolerability of Regimen as Measured by Grade and Frequency of Adverse Events Exceeding 10% in Total Frequency Time to Hematologic Recovery as Measured by Time to Neutrophil Recovery Time to Hematologic Recovery as Measured by Time to Platelet Recovery Characterize the Mobilization of Leukemic Cells With Plerixafor Plus G-CSF as Measured by Fold Change in White Blood Cells Characterize the Mobilization of Leukemic Cells With Plerixafor Plus G-CSF as Measured by Fold Change in AML Blast Count Characterize the Effects of Plerixafor Plus G-CSF on Fold Change in CXCR4 Clone 1D9 Relative Mean Fluorescent Intensity Characterize the Effects of Plerixafor Plus G-CSF on Fold Change in CXCR4 Clone 12G5 Relative Mean Fluorescent Intensity Time to            | Phase 1 Phase 2 | 39  | Feb-11    | April 4, 2017 |
| G-CSF | NCT00041470 | Navelbine, Taxol, Herceptin and Neupogen in Stage IV Breast Cancer: A Phase I - II Trial                                                                                                          | Terminated | Breast Cancer                                                                                                                                                                                                           | Drug: Paclitaxel Drug: Vinorelbine Drug: Herceptin Drug: Filgrastim                                                                 | To Measure Response Rates, Time to Progression and Survival in Patients so Treated. To Measure the Qualitative and Quantitative Toxicity of This Regimen.                                                                                                                                                                                                                                                                                                                                                                                                                                                                                                                                                                                                                                                                                                                                                                                      | Phase 1 Phase 2 | 38  | Mar-01    | 17-Jul-17     |
| G-CSF | NCT01164475 | Evaluation of Approved Weight-Based Dose Compared to Fixed Dose of Plerixafor in Patients With Non-Hodgkin's Lymphoma (NHL) Weighing Less Than 70 Kilograms                                       | Completed  | Non-Hodgkin's Lymphoma                                                                                                                                                                                                  | Drug: Granulocyte-colony stimulating factor (G-CSF) Drug: Fixed Dose Plerixafor Drug: Weight-Based Plerixafor                       | Proportion of Patients Who Achieved at Least 5*10^6 Cluster of Differentiation 34+ (CD34+) Cells Per Kilogram (Cells/kg) Area Under the Concentration-time Curve From Time 0 to 10 Hours (AUC [0-10]) Proportion of Patients Who Achieved at Least 2*10^6 CD34+ Cells/kg in Less Than or Equal to 4 Days of Apheresis Median Number of Days of Apheresis to Collect at Least 2*10^6 CD34+ Cells/kg Median Number of Days of Apheresis to Collect at Least 5*10^6 CD34+ Cells/kg Total Number of CD34+ Cells/kg Collected Over up to 4 Aphereses Mean Fold Increase in Peripheral Blood CD34+ Cell Count Following Plerixafor Maximum Observed Plasma Concentration (Cmax) Time to                                                                                                                                                                                                                                                              | Phase 4         | 61  | Oct-10    | 25-Feb-14     |
| G-CSF | NCT02044796 | Filgrastim, Cladribine, Cytarabine, and Mitoxantrone Hydrochloride in Treating Patients With Newly Diagnosed or Relapsed/Refractory Acute Myeloid Leukemia or High-Risk Myelodysplastic Syndromes | Completed  | Acute Biphenotypic Leukemia de Novo Myelodysplastic Syndrome Previously Treated Myelodysplastic Syndrome Recurrent Adult Acute Myeloid Leukemia Untreated Adult Acute Myeloid Leukemia Secondary Acute Myeloid Leukemia | Drug: Cytarabine Biological: Cladribine Drug: Filgrastim Other: Laboratory Biomarker Analysis Drug: Mitoxantrone Hydrochloride      | Number of Participants With Dose Limiting Toxicities of Mitoxantrone (Phase I, Dose Level 4) Minimal Residual Disease Negative Complete Remission Rate in Patients With Newly Diagnosed Disease (Phase II) Overall Survival (Phase II) Remission Rate (Complete Remission and Complete Remission With Incomplete Platelet Count Recovery) of This Regimen in Patients With Relapsed/Refractory Disease (Phase II)                                                                                                                                                                                                                                                                                                                                                                                                                                                                                                                              | Phase 1 Phase 2 | 199 | 23-Jan-14 | 10-Jan-20     |
| G-CSF | NCT01097057 | Rituximab, Combination Chemotherapy, Filgrastim (G-CSF), and Plerixafor in Treating Patients With Non-Hodgkin Lymphoma Undergoing Mobilization of Autologous Peripheral Blood Stem Cells          | Completed  | Non-Hodgkin Lymphoma                                                                                                                                                                                                    | Drug: Etoposide Biological: Filgrastim Drug: Ifosfamide Procedure: Leukapheresis Drug: Plerixafor Biological: Rituximab             | Number of Patients to Mobilize $\geq 5 \times 10^6$ CD34 Cells/kg Autologous PBSC (Efficacy) Number of Patients Who Achieved $\geq 5 \times 10^6$ CD34 Cells/kg in $\leq 4$ Apheresis Days Number of Participants Requiring One or Two Apheresis Collection Days to Reach $\geq 5 \times 10^6$ CD34 Cells/kg Total Number of Participants Who Did Not Collect $\geq 5 \times 10^6$ CD34 Cells/kg in a Maximum of Four Apheresis Days                                                                                                                                                                                                                                                                                                                                                                                                                                                                                                           | Phase 2         | 20  | 9-Nov-10  | 23-Jan-18     |
| G-CSF | NCT00733824 | Intravenous AMD3100 for Collection of Autologous Peripheral Blood Stem Cells in Patients With Lymphoma                                                                                            | Completed  | Lymphoma, Non-Hodgkin Hodgkin Disease                                                                                                                                                                                   | Drug: AMD3100 Drug: G-CSF Procedure: Apheresis                                                                                      | Maximum Tolerated Dose (MTD) of IV AMD3100 + G-CSF in Mobilization of Peripheral Blood Stem Cell in Patients With Lymphoma (Phase I Only) Number of Participants Who Experienced Dose Limiting Toxicities in Phase I Portion of Study Kinetics of Stem Cell Mobilization Using IV AMD3100 as Measured by Median Fold Change in the Number of CD34+ Cells After AMD3100 IV Administration Pharmacodynamic Response to a Dose of SC AMD3100 as Measured by Mean Percentage of the Circulating CD34+ Count With the 34+RA-123+/- Phenotype Toxicity of the Combination IV AMD3100 and G-CSF to Mobilize $\geq 2 \times 10^6$ CD34+ Cells/kg as Measured by Number of Participants Who Experience                                                                                                                                                                                                                                                  | Phase 1 Phase 2 | 61  | Nov-08    | 9-Mar-17      |
| G-CSF | NCT00140140 | A Phase I/II Study of ABI-007 (Abraxane®, Nab®-Paclitaxel)and Vinorelbine in Patients With Stage IV (Metastatic) Breast Cancer                                                                    | Terminated | Stage IV (Metastatic) Breast Cancer                                                                                                                                                                                     | Drug: ABI-007 Drug: vinorelbine Drug: Trastuzumab Biological: G-CSF                                                                 | Participants With Confirmed Complete or Partial Overall Response According to Response Evaluation Criteria in Solid Tumors (RECIST Version 1.0) Participants With Dose Limiting Toxicities Percentage of Participants With Discontinued, Delayed or Interrupted Therapy Participant Counts of the Most Severe Grade for Absolute Neutrophil (ANC), White Blood Cell (WBC), Platelet, and Hemoglobin Counts as Graded by the National Cancer Institute Common Terminology Criteria for Adverse Experience (NCI CTCAE v3) Nadir Measurement for Absolute Neutrophil (ANC), White Blood Cell (WBC) and Platelet Count Nadir Measurement for Hemoglobin (Hgb) Percentage of Participants With Stable Disease for $\geq 16$ Weeks, or Complete or Partial Response According to Response Evaluation Criteria in Solid Tumors (RECIST Version 1.0) Kaplan Meier Estimate for Time to Disease Progression (TTP) Kaplan-Meier Estimate for Duration of | Phase 1 Phase 2 | 16  | Aug-05    | 26-Nov-19     |
| G-CSF | NCT01266447 | Veliparib, Topotecan Hydrochloride, and Filgrastim or Pegfilgrastim in Treating Patients With Persistent or Recurrent Cervical Cancer                                                             | Completed  | Cervical Adenocarcinoma Cervical Adenosquamous Carcinoma Cervical Small Cell Carcinoma Cervical Squamous Cell Carcinoma Recurrent Cervical Carcinoma Stage III Cervical Cancer Stage IVA Cervical                       | Biological: Filgrastim Other: Laboratory Biomarker Analysis Biological: Pegfilgrastim Drug: Topotecan Hydrochloride Drug: Veliparib | Tumor Responses Number of Patients With Dose-limiting Toxicities (in Safety lead-in) Adverse Events (Grade 3 or Higher) During Treatment Period Progression-free Survival Overall Survival Duration of Objective Response                                                                                                                                                                                                                                                                                                                                                                                                                                                                                                                                                                                                                                                                                                                      | Phase 2         | 27  | Feb-11    | 8-Aug-19      |
| G-CSF | NCT00041067 | S0215 Trastuzumab, Docetaxel, Vinorelbine, and Filgrastim in Treating Women With Stage IV                                                                                                         | Completed  | Breast Cancer                                                                                                                                                                                                           | Biological: filgrastim Biological: trastuzumab Drug: docetaxel Drug: vinorelbine                                                    | Survival at 1 Year Response Rate (Complete and Partial, Confirmed and Unconfirmed) Progression-free Survival Toxicity                                                                                                                                                                                                                                                                                                                                                                                                                                                                                                                                                                                                                                                                                                                                                                                                                          | Phase 2         | 76  | Sep-02    | 6-Jun-13      |
| G-CSF | NCT00998049 | Plerixafor in Treating Patients With Multiple Myeloma Previously Treated With Lenalidomide and Planning to Undergo Autologous Stem Cell                                                           | Completed  | Multiple Myeloma Refractory Multiple Myeloma Stage I Multiple Myeloma Stage II Multiple Myeloma Stage III Multiple Myeloma                                                                                              | Drug: plerixafor Drug: filgrastim                                                                                                   | Number of Patients Achieving 3 Million CD34 Cells/kg After 2 Days of Apheresis CD34 Yield on Day 1 CD34 Yield Day 2 Median Number of Days of Apheresis Time to Reach 6 Million CD34 Cells Rate of Failure to Mobilize                                                                                                                                                                                                                                                                                                                                                                                                                                                                                                                                                                                                                                                                                                                          | Phase 2         | 40  | Dec-09    | 14-May-15     |

|       |             |                                                                                                                                                                                                                                    |                        |                                                                                                                                                                                                                                                                                                                                                                                                                                                                                                                                                                                                                                                                                                                                                                                                                                                                                                                                                                                                                                                                                                                                                                                       |                                                                                                                                                                                                                                               |                                                                                                                                                                                                                                                                                                                                                                                                                                                                                                                                                                                                                                                                                                              |                 |    |                |                |
|-------|-------------|------------------------------------------------------------------------------------------------------------------------------------------------------------------------------------------------------------------------------------|------------------------|---------------------------------------------------------------------------------------------------------------------------------------------------------------------------------------------------------------------------------------------------------------------------------------------------------------------------------------------------------------------------------------------------------------------------------------------------------------------------------------------------------------------------------------------------------------------------------------------------------------------------------------------------------------------------------------------------------------------------------------------------------------------------------------------------------------------------------------------------------------------------------------------------------------------------------------------------------------------------------------------------------------------------------------------------------------------------------------------------------------------------------------------------------------------------------------|-----------------------------------------------------------------------------------------------------------------------------------------------------------------------------------------------------------------------------------------------|--------------------------------------------------------------------------------------------------------------------------------------------------------------------------------------------------------------------------------------------------------------------------------------------------------------------------------------------------------------------------------------------------------------------------------------------------------------------------------------------------------------------------------------------------------------------------------------------------------------------------------------------------------------------------------------------------------------|-----------------|----|----------------|----------------|
| G-CSF | NCT01027910 | PCI-24781 in Combination With Doxorubicin to Treat Sarcoma                                                                                                                                                                         | Completed              | Sarcoma                                                                                                                                                                                                                                                                                                                                                                                                                                                                                                                                                                                                                                                                                                                                                                                                                                                                                                                                                                                                                                                                                                                                                                               | Drug: PCI-24781 Drug: Doxorubicin Drug: GCSF                                                                                                                                                                                                  | Maximum Tolerated Dose Dose Limiting Toxicities Number of Partial Responses (PR) Rate of Progression-free Survival at 6 Months in Participants Who Received PCI-24781 Doxorubicin Combination Administration.                                                                                                                                                                                                                                                                                                                                                                                                                                                                                                | Phase 1 Phase 2 | 20 | Feb-09         | 14-Feb-17      |
| G-CSF | NCT02642965 | Liposome-encapsulated Daunorubicin-Cytarabine, Fludarabine Phosphate, Cytarabine, and Filgrastim in Treating Younger Patients With Relapsed or Refractory Acute Myeloid Leukemia                                                   | Active, not recruiting | Recurrent Childhood Acute Myeloid Leukemia Secondary Acute Myeloid Leukemia Therapy-Related Acute Myeloid Leukemia                                                                                                                                                                                                                                                                                                                                                                                                                                                                                                                                                                                                                                                                                                                                                                                                                                                                                                                                                                                                                                                                    | Drug: Cytarabine Biological: Filgrastim Drug: Fludarabine Phosphate Other: Laboratory Biomarker Analysis Drug: Liposome-encapsulated Daunorubicin-Cytarabine Other: Pharmacological Study                                                     | Number of Participants With a Dose-limiting Toxicity Percentage of Responders (Complete Response or Complete Remission With Partial Platelet Recovery) After up to 2 Cycles Percentage of Responders (Complete Response or Complete Remission With Partial or Incomplete Platelet Recovery) After First Cycle of Therapy Liposome-encapsulated Daunorubicin Clearance Liposome-encapsulated Daunorubicin Volume of Distribution Liposome-encapsulated Daunorubicin Time of Maximum Concentration Liposome-encapsulated Daunorubicin Area Under the Curve Liposome-encapsulated Cytarabine Clearance Liposome-encapsulated Cytarabine Volume of Distribution Liposome-encapsulated Cytarabine Time of Maximum | Phase 1 Phase 2 | 38 | April 25, 2016 | 27-Jan-20      |
| G-CSF | NCT01110135 | Bendamustine Hydrochloride, Etoposide, Dexamethasone, and Filgrastim For Peripheral Blood Stem Cell Mobilization in Treating Patients With Refractory or Recurrent Lymphoma or Multiple Myeloma                                    | Completed              | Adult Nasal Type Extranodal NK/T-cell Lymphoma Anaplastic Large Cell Lymphoma Angioimmunoblastic T-cell Lymphoma Cutaneous B-cell Non-Hodgkin Lymphoma Extranodal Marginal Zone B-cell Lymphoma of Mucosa-associated Lymphoid Tissue Intraocular Lymphoma Nodal Marginal Zone B-cell Lymphoma Peripheral T-cell Lymphoma Recurrent Adult Burkitt Lymphoma Recurrent Adult Diffuse Large Cell Lymphoma Recurrent Adult Diffuse Mixed Cell Lymphoma Recurrent Adult Diffuse Small Cleaved Cell Lymphoma Recurrent Adult Grade III Lymphomatoid Granulomatosis Recurrent Adult Hodgkin Lymphoma Recurrent Adult Immunoblastic Large Cell Lymphoma Recurrent Adult Lymphoblastic Lymphoma Recurrent Adult T-cell Leukemia Lymphoma Recurrent Cutaneous T-cell Non-Hodgkin Lymphoma Recurrent Grade 1 Follicular Lymphoma Recurrent Grade 2 Follicular Lymphoma Recurrent Grade 3 Follicular Lymphoma Recurrent Mantle Cell Lymphoma Recurrent                                                                                                                                                                                                                                             | Drug: bendamustine hydrochloride Drug: dexamethasone Biological: filgrastim Procedure: leukapheresis Other: laboratory biomarker analysis Other: flow cytometry Drug: etoposide                                                               | Successful Mobilization and Collection of PBSCs                                                                                                                                                                                                                                                                                                                                                                                                                                                                                                                                                                                                                                                              | Phase 2         | 43 | Aug-10         | 24-May-17      |
| G-CSF | NCT01408043 | Etoposide, Filgrastim, and Plerixafor in Improving Stem Cell Mobilization in Treating Patients With Non-Hodgkin Lymphoma                                                                                                           | Terminated             | Adult Acute Lymphoblastic Leukemia in Remission Adult Grade III Lymphomatoid Granulomatosis Adult Nasal Type Extranodal NK/T-cell Lymphoma Anaplastic Large Cell Lymphoma Angioimmunoblastic T-cell Lymphoma Cutaneous B-cell Non-Hodgkin Lymphoma Extranodal Marginal Zone B-cell Lymphoma of Mucosa-associated Lymphoid Tissue Hepatosplenic T-cell Lymphoma Nodal Marginal Zone B-cell Lymphoma Noncutaneous Extranodal Lymphoma Peripheral T-cell Lymphoma Recurrent Adult Burkitt Lymphoma Recurrent Adult Diffuse Large Cell Lymphoma Recurrent Adult Diffuse Mixed Cell Lymphoma Recurrent Adult Diffuse Small Cleaved Cell Lymphoma Recurrent Adult Grade III Lymphomatoid Granulomatosis Recurrent Adult Immunoblastic Large Cell Lymphoma Recurrent Adult Lymphoblastic Lymphoma Recurrent Adult T-cell Leukemia Lymphoma Recurrent Cutaneous T-cell Non-Hodgkin Lymphoma Recurrent Grade 1 Follicular Lymphoma Recurrent Grade 2 Follicular Lymphoma Recurrent Grade 3 Follicular Lymphoma Recurrent Mantle Cell Lymphoma Recurrent Marginal Zone Lymphoma Recurrent Mycosis Fungoides/Sézary Syndrome Recurrent Small Lymphocytic Lymphoma Refractory Chronic Lymphocytic | Drug: plerixafor Biological: filgrastim Drug: etoposide Procedure: leukapheresis                                                                                                                                                              | Collection Using Plerixafor, Etoposide, and Filgrastim Progression-free Survival Overall Survival Neutrophil Recovery in Super Mobilizers and Normal Mobilizers Platelet Recovery in Super Mobilizers and Normal Mobilizers Length of Hospital Stay in Super Mobilizers and Normal Mobilizers Progression-free Survival in Supermobilizers and Normal Mobilizers Overall Survival in Supermobilizers and Normal Mobilizers Number of Days of Apheresis Required Number of Transfusion Requirements Need for Remobilization Correlation of Peripheral CD34+ Cell Count With Graft Content of CD34+ Cells                                                                                                      | Not Applicable  | 25 | Oct-11         | 14-Jun-19      |
| G-CSF | NCT00681044 | HD Melphalan and SCT in Patients With IGDD or LCDD                                                                                                                                                                                 | Terminated             | Multiple Myeloma                                                                                                                                                                                                                                                                                                                                                                                                                                                                                                                                                                                                                                                                                                                                                                                                                                                                                                                                                                                                                                                                                                                                                                      | Biological: filgrastim Drug: melphalan Procedure: Stem Cell Infusion                                                                                                                                                                          | Hematologic Response Rate Predictability of Early Free Light-chain Response for Heme Response Organ or Clinical Response Overall Survival Tolerability                                                                                                                                                                                                                                                                                                                                                                                                                                                                                                                                                       | Phase 2         | 5  | Oct-06         | April 28, 2017 |
| G-CSF | NCT00407888 | Doxorubicin Hydrochloride, Cyclophosphamide, and Filgrastim Followed By Paclitaxel Albumin-Stabilized Nanoparticle Formulation With or Without Trastuzumab in Treating Patients With Breast Cancer Previously Treated With Surgery | Completed              | Estrogen Receptor-positive Breast Cancer HER2-positive Breast Cancer Stage IA Breast Cancer Stage IB Breast Cancer Stage II Breast Cancer Stage IIIA Breast Cancer Stage IIIB Breast Cancer Stage IIIC Breast Cancer Stage IV Breast Cancer                                                                                                                                                                                                                                                                                                                                                                                                                                                                                                                                                                                                                                                                                                                                                                                                                                                                                                                                           | Drug: doxorubicin hydrochloride Drug: cyclophosphamide Biological: filgrastim Drug: paclitaxel albumin-stabilized nanoparticle formulation Biological: trastuzumab Other: laboratory biomarker analysis Procedure: quality-of-life assessment | Disease-free Survival Following a Dose-intensive Weekly Regimen of Adriamycin + Oral Cyclophosphamide Augmented With G-CSF Support Followed by Abraxane and Herceptin Delivered Dose Intensity of the Regimen Toxicity Associated With This Regimen Time to Treatment Failure Overall Survival                                                                                                                                                                                                                                                                                                                                                                                                               | Phase 2         | 60 | May-06         | 31-Aug-17      |

|       |             |                                                                                                                                                    |            |                                                                                                                                                                                                                                                                                                       |                                                                                                                                                                                                                                                                                                                                                                              |                                                                                                                                                                                                                                                                                                                                                                                                                                                                                                                                                                                                                                                                                                                                                                                                                                                                                                                                                   |                |     |            |           |
|-------|-------------|----------------------------------------------------------------------------------------------------------------------------------------------------|------------|-------------------------------------------------------------------------------------------------------------------------------------------------------------------------------------------------------------------------------------------------------------------------------------------------------|------------------------------------------------------------------------------------------------------------------------------------------------------------------------------------------------------------------------------------------------------------------------------------------------------------------------------------------------------------------------------|---------------------------------------------------------------------------------------------------------------------------------------------------------------------------------------------------------------------------------------------------------------------------------------------------------------------------------------------------------------------------------------------------------------------------------------------------------------------------------------------------------------------------------------------------------------------------------------------------------------------------------------------------------------------------------------------------------------------------------------------------------------------------------------------------------------------------------------------------------------------------------------------------------------------------------------------------|----------------|-----|------------|-----------|
| G-CSF | NCT00075608 | 2nd Autologous Stem Cell Transplant in Patients With Persistent/Recurrent (AL) Amyloidosis                                                         | Terminated | Multiple Myeloma Plasma Cell Neoplasm                                                                                                                                                                                                                                                                 | Biological: filgrastim Drug: melphalan Procedure: autologous stem cell transplantation Procedure: stem cell                                                                                                                                                                                                                                                                  | Feasibility and Tolerability Response and Durability of Response Evaluate Immune Reconstitution                                                                                                                                                                                                                                                                                                                                                                                                                                                                                                                                                                                                                                                                                                                                                                                                                                                   | Phase 2        | 12  | Aug-01     | 27-Jan-17 |
| G-CSF | NCT00098774 | Rituximab and Combination Chemotherapy in Treating Patients With Newly Diagnosed Primary CNS Lymphoma                                              | Completed  | Lymphoma                                                                                                                                                                                                                                                                                              | Biological: filgrastim Biological: rituximab Drug: cytarabine Drug: etoposide Drug: leucovorin calcium Drug: methotrexate Drug: temozolomide                                                                                                                                                                                                                                 | Complete Response Rate After Remission Induction 4 Year Progression Free Rate Change From Baseline in Mini-Mental Status Evaluation at 4 Months 4 Year Overall Survival Rate                                                                                                                                                                                                                                                                                                                                                                                                                                                                                                                                                                                                                                                                                                                                                                      | Phase 2        | 47  | Oct-04     | 6-Jul-16  |
| G-CSF | NCT00363467 | Busulfan Monotherapy as Conditioning for Autologous Hematopoietic Progenitor Cell                                                                  | Terminated | Acute Myeloid Leukemia (AML)                                                                                                                                                                                                                                                                          | Drug: G-CSF Drug: Leukapheresis Drug: Busulfan Procedure: Stem cell reinfusion                                                                                                                                                                                                                                                                                               | 100-day Non-relapse Mortality Successful Autologous Stem Cell Collection Severe Regimen-related Toxicity 1 Year Event-free Survival 1 Year Overall Survival                                                                                                                                                                                                                                                                                                                                                                                                                                                                                                                                                                                                                                                                                                                                                                                       | Not Applicable | 3   | May-06     | 23-Mar-17 |
| G-CSF | NCT01025284 | A Study for Participants With Small-Cell Lung Cancer                                                                                               | Completed  | Small Cell Lung Cancer                                                                                                                                                                                                                                                                                | Drug: LY2523355 Drug: Granulocyte colony-stimulating factor (G-CSF)                                                                                                                                                                                                                                                                                                          | Part A: Percentage of Participants Achieving an Overall Response (Overall Response Rate) Part B: Percentage of Participants Achieving a Best Response (Clinical Benefit Rate) Part A: Progression-Free Survival Part B: Progression-Free Survival Part A: Percentage of Participants Achieving a Best Response (Clinical Benefit Rate) Part B: Percentage of Participants Achieving an Overall Response (Overall Response Rate) Part A: Pharmacokinetics - Maximum Observed Plasma Concentration (Cmax) of LY2523355 and Its Metabolite (LSN2546307) Part B: Pharmacokinetics - Maximum Observed Plasma Concentration (Cmax) of LY2523355 Part A: Pharmacokinetics - Area Under the Plasma Concentration Versus Time Curve of LY2523355 From Time Zero to Infinity [AUC(0-∞)] Part B: Pharmacokinetics - Area Under the Plasma Concentration Versus Time Curve of LY2523355 From Time Zero to Infinity [AUC(0-∞)] Total Lung Cancer Symptom Scale | Phase 2        | 64  | Dec-09     | 17-Sep-19 |
| G-CSF | NCT00039130 | Rituximab, Chemotherapy, and Filgrastim in Treating Patients With Burkitt's Lymphoma or Burkitt's Leukemia                                         | Completed  | Leukemia Lymphoma                                                                                                                                                                                                                                                                                     | Biological: filgrastim Biological: rituximab Drug: cyclophosphamide Drug: cytarabine Drug: dexamethasone Drug: doxorubicin hydrochloride Drug: etoposide Drug: ifosfamide Drug: leucovorin calcium Drug: methotrexate Drug: prednisone Drug:                                                                                                                                 | Complete Response Rate 2 Year Event Free Survival 2 Year Overall Survival                                                                                                                                                                                                                                                                                                                                                                                                                                                                                                                                                                                                                                                                                                                                                                                                                                                                         | Phase 2        | 105 | May-02     | 1-Aug-16  |
| G-CSF | NCT01822756 | An Open-Label Study of Ruxolitinib Given With Chemotherapy in Patients With Advanced Solid Tumors                                                  | Terminated | Solid Tumors Pancreatic Cancer                                                                                                                                                                                                                                                                        | Drug: ruxolitinib Drug: gemcitabine Drug: nab-paclitaxel Drug: filgrastim                                                                                                                                                                                                                                                                                                    | Percentage of Participants With Adverse Events That Are Defined as Dose Limiting Toxicities (DLTs) Plasma Concentrations Will be Used to Estimate Peak Plasma Concentration (Cmax) and Area Under the Plasma Concentration Curve (AUC) Plasma Concentration of Tumor Specific Biomarkers and Cytokines Before and During Treatment Clinical Activity as Measured by the Greatest Decrease in Tumor Burden Compared to Baseline Percentage of Participants With a Best Response by RECIST                                                                                                                                                                                                                                                                                                                                                                                                                                                          | Phase 1        | 42  | April 2013 | 12-Feb-18 |
| G-CSF | NCT00862134 | Randomized, Multi-center, Open-label, Study of PR104 Versus PR104/Docetaxel in Non-Small Cell                                                      | Terminated | Non-Small Cell Lung Cancer                                                                                                                                                                                                                                                                            | Drug: PR104 Drug: docetaxel Drug: Granulocyte colony-stimulating factor                                                                                                                                                                                                                                                                                                      | Number of Participants That Achieved a Response (Complete or Partial) After Receiving PR104/Docetaxel Versus Docetaxel Alone Safety and Tolerability: Serious Adverse Events Positive Aldo-keto Reductase 1C3 (AKR1C3) Expression in Participating Patients                                                                                                                                                                                                                                                                                                                                                                                                                                                                                                                                                                                                                                                                                       | Phase 2        | 42  | Mar-09     | 10-Jan-13 |
| G-CSF | NCT00615901 | Dose Dense Adjuvant CMF (Cyclophosphamide, Methotrexate, Fluorouracil) at 14 and 10-11 Day Intervals for Women With Early Stage Breast Cancer      | Completed  | Breast Cancer                                                                                                                                                                                                                                                                                         | Drug: cyclophosphamide, methotrexate, fluorouracil, PEG-filgrastim                                                                                                                                                                                                                                                                                                           | The Number of Patients Who Completed 8 Cycles.                                                                                                                                                                                                                                                                                                                                                                                                                                                                                                                                                                                                                                                                                                                                                                                                                                                                                                    | Not Applicable | 38  | Jan-08     | 3-Mar-17  |
| G-CSF | NCT00006011 | Comparison of Two Combination Chemotherapy Regimens Plus Radiation Therapy in Treating Patients With Stage III or Stage IV Endometrial Cancer      | Completed  | Endometrial Adenocarcinoma Endometrial Adenosquamous Carcinoma Endometrial Clear Cell Adenocarcinoma Endometrioid Adenocarcinoma, Variant With Squamous Differentiation Endometrial Serous                                                                                                            | Drug: Doxorubicin Hydrochloride Drug: Cisplatin Biological: Filgrastim Biological: Pegfilgrastim Drug: Paclitaxel                                                                                                                                                                                                                                                            | Recurrence-Free Survival of Eligible Patients Who Received a Random Treatment Allocation.                                                                                                                                                                                                                                                                                                                                                                                                                                                                                                                                                                                                                                                                                                                                                                                                                                                         | Phase 3        | 659 | Jul-00     | 19-May-15 |
| G-CSF | NCT00554463 | G-CSF and Pegfilgrastim in Treating Neutropenia in Patients Undergoing Radiation Therapy and Chemotherapy for Limited Stage Small Cell Lung Cancer | Completed  | Lung Cancer                                                                                                                                                                                                                                                                                           | Drug: Filgrastim Drug: Pegfilgrastim Drug: Etoposide Drug: Cisplatin Radiation: radiation therapy                                                                                                                                                                                                                                                                            | Number of Patients With Grade 3-4 Febrile Neutropenia During Concurrent Chemoradiotherapy Number of Patients With Grade 3-4 Febrile Neutropenia During Adjuvant Chemoradiotherapy Number of Patients With Dose Modifications or Treatment Delays Number of Patients With Grade 3+ Esophagitis, Pneumonitis, and Other Non-hematological Adverse Events Number of Patients With Grade 4                                                                                                                                                                                                                                                                                                                                                                                                                                                                                                                                                            | Phase 2        | 5   | Jan-08     | 29-May-19 |
| G-CSF | NCT00194779 | Combination Chemotherapy and Filgrastim Before Surgery in Treating Patients With HER2-Positive Breast Cancer That Can Be Removed By Surgery        | Completed  | Estrogen Receptor-negative Breast Cancer Estrogen Receptor-positive Breast Cancer HER2-positive Breast Cancer Progesterone Receptor-negative Breast Cancer Progesterone Receptor-positive Breast Cancer Stage IA Breast Cancer Stage IB Breast Cancer Stage II Breast Cancer Stage IIIA Breast Cancer | Drug: doxorubicin hydrochloride Drug: cyclophosphamide Drug: paclitaxel Biological: filgrastim Drug: capecitabine Drug: methotrexate Drug: vinorelbine tartrate Procedure: needle biopsy Procedure: therapeutic conventional surgery Other: immunohistochemistry staining method Biological: trastuzumab Drug: tamoxifen citrate Drug: letrozole Other: laboratory biomarker | Combined Rate of Microscopic pCR and Macroscopic Pathologic Complete Response (mCR) Number and Percent of Patients Reporting Grade 2, 3, 4, or Fatal Toxicities of These Regimens, Need for Dose Reduction, or Treatment Interruption or Discontinuation Correlation of Molecular Markers With Response Relapse Rate in Patients With Operable Breast Cancer Treated With Neoadjuvant Chemotherapy for 12 Weeks Followed by Weekly Paclitaxel for 12 Weeks and Adjuvant Chemotherapy Time to Progression OS in Patients With Operable Breast Cancer Treated With Neoadjuvant Chemotherapy for 12 Weeks Followed Weekly Paclitaxel for 12 Weeks and Adjuvant Chemotherapy With XMN Disease-free Survival Clinical Response to Neoadjuvant Therapy Clinical Response to Paclitaxel                                                                                                                                                                  | Phase 2        | 50  | Oct-03     | 12-Mar-18 |
| G-CSF | NCT00057837 | Comparison of Two Combination Chemotherapy Regimens in Treating Patients With Extensive-Stage Small Cell Lung Cancer                               | Completed  | Extensive Stage Small Cell Lung Cancer                                                                                                                                                                                                                                                                | Biological: G-CSF Drug: Cisplatin Drug: Etoposide Drug: Irinotecan Drug: Topotecan                                                                                                                                                                                                                                                                                           | Proportion of Patients With Objective Response by Solid Tumor Response Criteria (RECIST) Duration of Response Overall Survival                                                                                                                                                                                                                                                                                                                                                                                                                                                                                                                                                                                                                                                                                                                                                                                                                    | Phase 2        | 140 | Mar-04     | 13-Feb-13 |

|       |             |                                                                                                                                                                                                                                                       |            |                                                                                                                                                                                                                                                                                                                                                                                                                                                                                                                                                                                                                                                                                  |                                                                                                                                                                                                                                           |                                                                                                                                                                                                                                                                                                                                                                                                                                                                                                                                                                                                                                                                                                                                                                                                                                                                                                                                                                                                                                                                                                                                                                                                                                                                                                                                                                                                                                                                                                                                                          |                 |    |            |           |
|-------|-------------|-------------------------------------------------------------------------------------------------------------------------------------------------------------------------------------------------------------------------------------------------------|------------|----------------------------------------------------------------------------------------------------------------------------------------------------------------------------------------------------------------------------------------------------------------------------------------------------------------------------------------------------------------------------------------------------------------------------------------------------------------------------------------------------------------------------------------------------------------------------------------------------------------------------------------------------------------------------------|-------------------------------------------------------------------------------------------------------------------------------------------------------------------------------------------------------------------------------------------|----------------------------------------------------------------------------------------------------------------------------------------------------------------------------------------------------------------------------------------------------------------------------------------------------------------------------------------------------------------------------------------------------------------------------------------------------------------------------------------------------------------------------------------------------------------------------------------------------------------------------------------------------------------------------------------------------------------------------------------------------------------------------------------------------------------------------------------------------------------------------------------------------------------------------------------------------------------------------------------------------------------------------------------------------------------------------------------------------------------------------------------------------------------------------------------------------------------------------------------------------------------------------------------------------------------------------------------------------------------------------------------------------------------------------------------------------------------------------------------------------------------------------------------------------------|-----------------|----|------------|-----------|
| G-CSF | NCT00068393 | Doxorubicin and Gemcitabine in Treating Patients With Locally Recurrent or Metastatic Unresectable Renal Cell Carcinoma                                                                                                                               | Completed  | Metastatic Renal Cell Carcinoma Renal Cell Carcinoma With Sarcomatoid Features                                                                                                                                                                                                                                                                                                                                                                                                                                                                                                                                                                                                   | Drug: Doxorubicin Drug: Gemcitabine Drug: G-CSF (granulocyte-colony stimulating factor) Drug: Neulasta                                                                                                                                    | Response Rate by Solid Tumor Response Criteria (RECIST) Overall Survival Progression-free Survival                                                                                                                                                                                                                                                                                                                                                                                                                                                                                                                                                                                                                                                                                                                                                                                                                                                                                                                                                                                                                                                                                                                                                                                                                                                                                                                                                                                                                                                       | Phase 2         | 39 | Dec-03     | 10-Jan-13 |
| G-CSF | NCT00061893 | Vinblastine, Celecoxib, and Combination Chemotherapy in Treating Patients With Newly-Diagnosed Metastatic Ewing's Sarcoma Family of Tumors                                                                                                            | Completed  | Sarcoma                                                                                                                                                                                                                                                                                                                                                                                                                                                                                                                                                                                                                                                                          | Drug: celecoxib Drug: cyclophosphamide Drug: doxorubicin hydrochloride Drug: etoposide Drug: ifosfamide Drug: vinblastine sulfate Drug: vincristine sulfate Procedure: conventional surgery Radiation: radiation therapy Drug: Plerixafor | Occurrence of Severe Toxicity Event Free Survival                                                                                                                                                                                                                                                                                                                                                                                                                                                                                                                                                                                                                                                                                                                                                                                                                                                                                                                                                                                                                                                                                                                                                                                                                                                                                                                                                                                                                                                                                                        | Phase 2         | 38 | April 2004 | 15-Feb-19 |
| G-CSF | NCT01146834 | Trial of Three Stem Cell Mobilization Regimens for Multiple Myeloma                                                                                                                                                                                   | Completed  | Multiple Myeloma                                                                                                                                                                                                                                                                                                                                                                                                                                                                                                                                                                                                                                                                 | Drug: bortezomib (Velcade) Drug: cyclophosphamide Drug: G-CSF Drug: Plerixafor                                                                                                                                                            | Number of Patients Able to Collect $\geq 6 \times 10^6$ CD34+ Cells/kg in $\leq 2$ Collections. Number of Patients Who Achieved Neutrophil Recovery After Melphalan 200 Based Transplant Number of Patients Who Achieved Platelet Recovery After Melphalan 200                                                                                                                                                                                                                                                                                                                                                                                                                                                                                                                                                                                                                                                                                                                                                                                                                                                                                                                                                                                                                                                                                                                                                                                                                                                                                           | Phase 3         | 47 | Mar-11     | 27-Dec-19 |
| G-CSF | NCT00582933 | Phase II Trial of a Chemotherapy Alone Regimen of IV Busulfan (Busulfex), Melphalan and Fludarabine as Myeloablative Regimen Followed by an Allogeneic T-Cell Depleted Hematopoietic Stem Cell Transplant From an HLA-Identical, or HLA-Non Identical | Completed  | Leukemia Myelodysplastic Syndrome Non-Hodgkin's Lymphoma Allogeneic Marrow Transplant                                                                                                                                                                                                                                                                                                                                                                                                                                                                                                                                                                                            | Drug: BUSULFAN, MELPHALAN, FLUDARABINE, G-CSF                                                                                                                                                                                             | Death From GVHD                                                                                                                                                                                                                                                                                                                                                                                                                                                                                                                                                                                                                                                                                                                                                                                                                                                                                                                                                                                                                                                                                                                                                                                                                                                                                                                                                                                                                                                                                                                                          | Phase 2         | 96 | May-01     | 1-Feb-16  |
| G-CSF | NCT01547806 | Collection of Transplant Stem Cells for Plasma Cell Myeloma                                                                                                                                                                                           | Completed  | Plasma Cell Myeloma Multiple Myeloma                                                                                                                                                                                                                                                                                                                                                                                                                                                                                                                                                                                                                                             | Drug: Filgrastim Drug: Plerixafor Procedure: Apheresis                                                                                                                                                                                    | Percentage of Patients Achieving at Least $2 \times 10^6$ Cluster of Differentiation 34 (CD34) Cells Per Kg Recipient Body Weight on Day 1 of Apheresis Percentage of Patients Requiring 2 Days to Achieve at Least $2 \times 10^6$ Cluster of Differentiation 34 (CD34) Cells Per Kg Recipient Body Weight Average Number of Cluster of Differentiation 34 (CD34) Cells Collected (Per Kg Recipient Body Weight (BW)) Median and Standard Deviation of Cluster of Differentiation 34 (CD34) Cells Collected (Per Kg Recipient Body Weight (BW)) Range of Cluster of Differentiation 34 (CD34) Cells Collected 25th and 75th Percentile Values of Cluster of Differentiation 34 (CD34) Cells Collected Number of Hematopoietic Progenitor Cell (HPC) Apheresis Products Collected and Cryopreserved for Subsequent Use in Autologous Hematopoietic Cell Transplantation (AHCT) in Subjects With Plasma Cell Myeloma (PCM) Number of Participants With Serious and Non-Serious Adverse Events Percentage of Patients That Required Plerixafor + Granulocyte-colony Stimulating Factor (G-CSF) And Only G-CSF (no Plerixafor) Percentage of Patients That Achieved or Did Not Achieve $5 \times 10^6$ Cluster of Differentiation 34 (CD34) Cells/kg Percentage of Patients That Achieved $\geq 2 \times 10^6$ But Less Than $5 \times 10^6$ Cluster of Differentiation 34 (CD34) Cells/kg (Day One Collection) Degree of Tumor Cell Contamination in the Final Product Impact of Plerixafor in the Degree of Tumor Cell Contamination in the Final Product | Phase 2         | 49 | 22-Feb-12  | 7-Mar-18  |
| G-CSF | NCT00513695 | Sunitinib Malate, Paclitaxel, Doxorubicin Hydrochloride, and Cyclophosphamide Before Surgery in Treating Patients With Stage IIB-IIIC Breast Cancer                                                                                                   | Completed  | Inflammatory Breast Cancer Male Breast Cancer Stage II Breast Cancer Stage IIIA Breast Cancer Stage IIIB Breast Cancer Stage IIIC Breast Cancer                                                                                                                                                                                                                                                                                                                                                                                                                                                                                                                                  | Drug: sunitinib malate Drug: paclitaxel Drug: doxorubicin hydrochloride Drug: cyclophosphamide Biological: filgrastim Procedure: therapeutic conventional surgery Other: laboratory biomarker analysis Other: flow cytometry              | Microscopic Pathologic CR (pCR) Rate Clinical Complete Response and Correlation With Plasma VEGF, Soluble VCAM (sVCAM), and Circulating Endothelial Cells (CECs) Levels Relapse Rate Time to Disease Progression Overall Survival Number and Percent of Subjects Reporting Adverse Events                                                                                                                                                                                                                                                                                                                                                                                                                                                                                                                                                                                                                                                                                                                                                                                                                                                                                                                                                                                                                                                                                                                                                                                                                                                                | Phase 2         | 68 | Jun-07     | 7-Aug-19  |
| G-CSF | NCT00863434 | Clofarabine and Cytarabine in Treating Patients With Acute Myeloid Leukemia With Minimal Residual Disease                                                                                                                                             | Terminated | Adult Acute Myeloid Leukemia in Remission Adult Acute Myeloid Leukemia With 11q23 (MLL) Abnormalities Adult Acute Myeloid Leukemia With Inv(16)(p13;q22) Adult Acute Myeloid Leukemia With t(15;17)(q22;q12) Adult Acute Myeloid Leukemia With t(16;16)(p13;q22) Adult Acute Myeloid Leukemia With t(8;21)(q22;q22) Recurrent Extranodal Marginal Zone B-cell Lymphoma of Mucosa-associated Lymphoid Tissue Nodal Marginal Zone B-cell Lymphoma Recurrent Grade 1 Follicular Lymphoma Recurrent Grade 2 Follicular Lymphoma Recurrent Grade 3 Follicular Lymphoma Recurrent Marginal Zone Lymphoma Recurrent Small Lymphocytic Lymphoma Splenic Marginal Zone Lymphoma Waldenstr | Drug: clofarabine Drug: cytarabine Biological: filgrastim                                                                                                                                                                                 | Minimal Residual Disease as Assessed by Bone Marrow Flow Cytometry Disease-free Survival Overall Survival                                                                                                                                                                                                                                                                                                                                                                                                                                                                                                                                                                                                                                                                                                                                                                                                                                                                                                                                                                                                                                                                                                                                                                                                                                                                                                                                                                                                                                                | Phase 2         | 2  | Feb-09     | 15-May-17 |
| G-CSF | NCT00012298 | Radiolabeled Monoclonal Antibody Plus Rituximab With and Without Filgrastim and Interleukin-11 in Treating Patients With Relapsed or Refractory Non-Hodgkin's Lymphoma                                                                                | Terminated | Extranodal Marginal Zone B-cell Lymphoma of Mucosa-associated Lymphoid Tissue Nodal Marginal Zone B-cell Lymphoma Recurrent Grade 1 Follicular Lymphoma Recurrent Grade 2 Follicular Lymphoma Recurrent Grade 3 Follicular Lymphoma Recurrent Marginal Zone Lymphoma Recurrent Small Lymphocytic Lymphoma Splenic Marginal Zone Lymphoma Waldenstr                                                                                                                                                                                                                                                                                                                               | Biological: rituximab Biological: yttrium Y 90 ibritumomab tiuxetan Biological: indium In 111 ibritumomab tiuxetan Biological: oprelvekin Biological: filgrastim                                                                          | Maximum Tolerated Dose (MTD) of Yttrium Y-90 Ibritumomab Tiuxetan (Y2B8) With and Without Filgrastim (G-CSF) and Interleukin-11 (IL-11) (Phase I) Toxicity of Single-dose Y2B8 Radioimmunotherapy With and Without the Use of Growth Factors (Phase I) Proportion of Patients Who Receive 2 Sequential Doses of Y2B8 Immunotherapy and Are Progression-free (Phase II) Association Between the Amounts of Tumor Radiation Indicated by the In2B8 Scan and Tumor Response (Phase I) Association Between In2B8 Scan and Positron Emission Tomography Scan Results (Phase I) Appearance of Tumor and Normal Organ Images on the Second In2B8 Scan (Phase I) Survival (Phase I) Time                                                                                                                                                                                                                                                                                                                                                                                                                                                                                                                                                                                                                                                                                                                                                                                                                                                                         | Phase 1 Phase 2 | 81 | April 2001 | 9-Aug-18  |
| G-CSF | NCT00134082 | Rituximab and Cyclophosphamide Followed by Vaccine Therapy in Treating Patients With Relapsed Hodgkin Lymphoma                                                                                                                                        | Completed  | Lymphoma                                                                                                                                                                                                                                                                                                                                                                                                                                                                                                                                                                                                                                                                         | Biological: KGEL vaccine Biological: Filgrastim Biological: Cyclophosphamide Biological: Rituximab Drug:                                                                                                                                  | Number of Participants With Grade 3-5 Adverse Events Percentage of Participants With an Increase in Frequency of LMP2-specific CD8+ T Cells Survival Days to Neutrophil and Platelet Engraftment                                                                                                                                                                                                                                                                                                                                                                                                                                                                                                                                                                                                                                                                                                                                                                                                                                                                                                                                                                                                                                                                                                                                                                                                                                                                                                                                                         | Phase 1 Phase 2 | 31 | Nov-05     | 26-Feb-19 |



|       |             |                                                                                                                                                                                             |                        |                                                                                                                                                                                                                                                                                                                                                                                                                                                                                                                                                                                                                                                                                                                                                                                                                                                  |                                                                                                                                                                                                            |                                                                                                                                                                                                                                                                                                                                                                                                                                                                                                                                        |                 |      |           |                |
|-------|-------------|---------------------------------------------------------------------------------------------------------------------------------------------------------------------------------------------|------------------------|--------------------------------------------------------------------------------------------------------------------------------------------------------------------------------------------------------------------------------------------------------------------------------------------------------------------------------------------------------------------------------------------------------------------------------------------------------------------------------------------------------------------------------------------------------------------------------------------------------------------------------------------------------------------------------------------------------------------------------------------------------------------------------------------------------------------------------------------------|------------------------------------------------------------------------------------------------------------------------------------------------------------------------------------------------------------|----------------------------------------------------------------------------------------------------------------------------------------------------------------------------------------------------------------------------------------------------------------------------------------------------------------------------------------------------------------------------------------------------------------------------------------------------------------------------------------------------------------------------------------|-----------------|------|-----------|----------------|
| G-CSF | NCT01012297 | Gemcitabine Hydrochloride and Docetaxel With or Without Bevacizumab in Treating Patients With Advanced or Recurrent Uterine                                                                 | Terminated             | Recurrent Uterine Corpus Sarcoma Stage IIIA Uterine Sarcoma Stage IIIB Uterine Sarcoma Stage IIIC Uterine Sarcoma Stage IVA Uterine Sarcoma Stage IVB Uterine Sarcoma Uterine Corpus Leiomyosarcoma                                                                                                                                                                                                                                                                                                                                                                                                                                                                                                                                                                                                                                              | Biological: Bevacizumab Drug: Docetaxel Biological: Filgrastim Drug: Gemcitabine Hydrochloride Biological: Pegfilgrastim Other: Placebo                                                                    | Progression-free Survival Overall Survival Frequency and Severity of Adverse Effects as Assessed by the CTCAE Version 4.0 Objective Response Rate as Measured by RECIST 1.1 Criteria                                                                                                                                                                                                                                                                                                                                                   | Phase 3         | 107  | Nov-09    | 23-Jul-19      |
| G-CSF | NCT00069953 | Combination Chemotherapy Followed By Chemoradiotherapy, With or Without Surgery, in Treating Patients With Resectable Locally Advanced Cancer of the Esophagus or Gastroesophageal Junction | Completed              | Esophageal Cancer                                                                                                                                                                                                                                                                                                                                                                                                                                                                                                                                                                                                                                                                                                                                                                                                                                | Biological: filgrastim Biological: pegfilgrastim Drug: cisplatin Drug: fluorouracil Drug: paclitaxel Procedure: conventional surgery Radiation: radiation therapy                                          | Overall Survival (1-year Rate Reported) Frequency of Major (Grade 4) Acute Treatment-related Toxicities Frequency of Patients With Persistent or Recurrent Disease Eligible for Surgical Salvage Resection                                                                                                                                                                                                                                                                                                                             | Phase 2         | 43   | Sep-03    | 17-Feb-17      |
| G-CSF | NCT00002558 | Combination Chemotherapy Plus Peripheral Stem Cell Transplantation in Treating Patients With Germ Cell Tumors                                                                               | Completed              | Extragenadal Germ Cell Tumor Ovarian Cancer Testicular Germ Cell Tumor                                                                                                                                                                                                                                                                                                                                                                                                                                                                                                                                                                                                                                                                                                                                                                           | Biological: filgrastim Drug: carboplatin Drug: etoposide Drug: ifosfamide Drug: paclitaxel Procedure: peripheral blood stem cell transplantation                                                           | Overall Objective Response                                                                                                                                                                                                                                                                                                                                                                                                                                                                                                             | Phase 1 Phase 2 | 108  | Jan-94    | 23-May-16      |
| G-CSF | NCT00254410 | FCM-R (Fludarabine, Cyclophosphamide, Mitoxantrone, Rituximab) in Previously Untreated Patients With Chronic Lymphocytic                                                                    | Completed              | Chronic Lymphocytic Leukemia                                                                                                                                                                                                                                                                                                                                                                                                                                                                                                                                                                                                                                                                                                                                                                                                                     | Drug: Fludarabine Drug: Cyclophosphamide Drug: Mitoxantrone Drug: Rituximab Drug: Filgrastim                                                                                                               | Clinical Response Rate at 3 Months Clinical Response Rate at 6 Months Molecular Response Rate at 3 Months Molecular Response Rate at 6 Months                                                                                                                                                                                                                                                                                                                                                                                          | Phase 2         | 30   | 14-Mar-05 | 1-May-19       |
| G-CSF | NCT00958256 | Study of Bortezomib in Combination With Cyclophosphamide and                                                                                                                                | Completed              | Mantle Cell Lymphoma Lymphoma                                                                                                                                                                                                                                                                                                                                                                                                                                                                                                                                                                                                                                                                                                                                                                                                                    | Drug: Bortezomib Drug: Rituximab Drug: Cyclophosphamide Drug: Mesna Drug: G-                                                                                                                               | Response Rate                                                                                                                                                                                                                                                                                                                                                                                                                                                                                                                          | Phase 2         | 22   | Aug-09    | April 13, 2015 |
| G-CSF | NCT00245011 | Samarium Sm 153 and Stem Cell Transplant Followed By Radiation Therapy Patients With Osteosarcoma                                                                                           | Completed              | Sarcoma                                                                                                                                                                                                                                                                                                                                                                                                                                                                                                                                                                                                                                                                                                                                                                                                                                          | Biological: filgrastim Drug: ifosfamide Procedure: peripheral blood stem cell transplantation Radiation: Sm-EDTMP (low dose) Radiation: sm-EDTMP                                                           | Tumor Response Predictive Value of Imaging Studies Overall and Progression-free Survival After Study Treatment Toxicity at End of Study Treatment Long Term Side Effects of Infusional Samarium-153 After Study Treatment Correlative Dose of Radiation by Low Dose and High Dose Samarium-153                                                                                                                                                                                                                                         | Phase 2         | 11   | Oct-04    | 30-Aug-16      |
| G-CSF | NCT00063999 | Doxorubicin Hydrochloride, Cisplatin, and Paclitaxel or Carboplatin and Paclitaxel in Treating Patients With Stage III-IV or Recurrent Endometrial Cancer                                   | Active, not recruiting | Recurrent Uterine Corpus Carcinoma Stage IIIA Uterine Corpus Cancer AJCC v7 Stage IIIB Uterine Corpus Cancer AJCC v7 Stage IIIC Uterine Corpus Cancer AJCC v7 Stage IVA Uterine Corpus Cancer AJCC v7 Stage IVB Uterine Corpus Cancer AJCC v7                                                                                                                                                                                                                                                                                                                                                                                                                                                                                                                                                                                                    | Drug: Carboplatin Drug: Cisplatin Drug: Doxorubicin Hydrochloride Biological: Filgrastim Other: Laboratory Biomarker Analysis Drug: Paclitaxel Biological: Pegfilgrastim Other: Quality-of-Life Assessment | Number of Participants Alive at Time of Last Follow-up. Patient-reported Neurotoxicity (Ntx) as Measured by the FACT/GOG-Ntx Subscale (Short) Patient Reported Quality of Life as Measured With the Combination of Physical Well-being (PWB) Subscale and Functional Well-being (FWB) Subscale From the FACT-G Number of Participants Alive at Time of Last Follow-up by Estrogen or Progesterone Receptor Status (Positive or Negative) Number of Participants With Indicated Severity of CTCAE v2 Graded Neurotoxicity and Infection | Phase 3         | 1381 | 25-Aug-03 | 28-May-19      |
| G-CSF | NCT00381940 | Bortezomib, Ifosfamide, and Vinorelbine Tartrate in Treating Young Patients With Hodgkin's Lymphoma That is Recurrent or Did Not Respond to Previous Therapy                                | Completed              | Adult Lymphocyte Depletion Hodgkin Lymphoma Adult Lymphocyte Predominant Hodgkin Lymphoma Adult Mixed Cellularity Hodgkin Lymphoma Adult Nodular Lymphocyte Predominant Hodgkin Lymphoma Adult Nodular Sclerosis Hodgkin Lymphoma Childhood Lymphocyte Depletion Hodgkin Lymphoma Childhood Lymphocyte Predominant Hodgkin Lymphoma Childhood Mixed Cellularity Hodgkin Lymphoma Childhood Nodular Sclerosis Hodgkin Lymphoma Recurrent Adult Lymphocyte Predominant Hodgkin Lymphoma Childhood Hodgkin Lymphoma Recurrent/Refractory Childhood Hodgkin Lymphoma Stage I Adult Hodgkin Lymphoma Stage I Childhood Hodgkin Lymphoma Stage II Adult Hodgkin Lymphoma Stage II Childhood Hodgkin Lymphoma Stage III Adult Hodgkin Lymphoma Stage III Childhood Hodgkin Lymphoma Stage IV Adult Hodgkin Lymphoma Stage IV Childhood Hodgkin Lymphoma | Drug: ifosfamide Drug: bortezomib Drug: vinorelbine tartrate Biological: filgrastim                                                                                                                        | Complete Response (CR) Toxicity Overall Response Rate Induction Success Rate Rate of Successful PBSC Harvest Biological Markers                                                                                                                                                                                                                                                                                                                                                                                                        | Phase 2         | 26   | Jan-07    | 20-Jun-14      |
| G-CSF | NCT00569673 | Docetaxel, Trabectedin, and G-CSF or Pegfilgrastim in Treating Patients With Recurrent or Persistent Ovarian Epithelial Cancer, Primary Peritoneal Cavity Cancer, or Fallopian Tube         | Completed              | Fallopian Tube Cancer Ovarian Cancer Primary Peritoneal Cavity Cancer                                                                                                                                                                                                                                                                                                                                                                                                                                                                                                                                                                                                                                                                                                                                                                            | Biological: filgrastim Biological: pegfilgrastim Drug: docetaxel Drug: trabectedin                                                                                                                         | Objective Tumor Response Number of Participants With Adverse Effects (Grade 3 or Higher) as Assessed by Common Terminology Criteria for Adverse Events (CTCAE) Version 3.0 Duration of Progression-free Survival and Overall Survival                                                                                                                                                                                                                                                                                                  | Phase 2         | 71   | Mar-08    | 18-Jul-18      |

|       |             |                                                                                                                                                                                           |                        |                                                                                                                                                                                                                                                                                                                                                                                                                                                                                                                                                                                                                                                                                                                                                           |                                                                                                                                                                                                                                                   |                                                                                                                                                                                                                                                                                                                                                                                                                                                                                                                                                                                                                                                                                                                                                                                                                                                                                                                                                                                                                                                                                                                                                                                                                                                                                                                                                               |                         |     |           |            |   |
|-------|-------------|-------------------------------------------------------------------------------------------------------------------------------------------------------------------------------------------|------------------------|-----------------------------------------------------------------------------------------------------------------------------------------------------------------------------------------------------------------------------------------------------------------------------------------------------------------------------------------------------------------------------------------------------------------------------------------------------------------------------------------------------------------------------------------------------------------------------------------------------------------------------------------------------------------------------------------------------------------------------------------------------------|---------------------------------------------------------------------------------------------------------------------------------------------------------------------------------------------------------------------------------------------------|---------------------------------------------------------------------------------------------------------------------------------------------------------------------------------------------------------------------------------------------------------------------------------------------------------------------------------------------------------------------------------------------------------------------------------------------------------------------------------------------------------------------------------------------------------------------------------------------------------------------------------------------------------------------------------------------------------------------------------------------------------------------------------------------------------------------------------------------------------------------------------------------------------------------------------------------------------------------------------------------------------------------------------------------------------------------------------------------------------------------------------------------------------------------------------------------------------------------------------------------------------------------------------------------------------------------------------------------------------------|-------------------------|-----|-----------|------------|---|
| G-CSF | NCT00822120 | S0816 Fludeoxyglucose F 18-PET/CT Imaging and Combination Chemotherapy With or Without Additional Chemotherapy and G-CSF in Treating Patients With Stage III or Stage IV Hodgkin Lymphoma | Active, not recruiting | Lymphoma Nonneoplastic Condition                                                                                                                                                                                                                                                                                                                                                                                                                                                                                                                                                                                                                                                                                                                          | Biological: bleomycin sulfate Biological: filgrastim Drug: ABVD regimen Drug: BEACOPP regimen Drug: cyclophosphamide Drug: dacarbazine Drug: doxorubicin hydrochloride Drug: etoposide Drug: procarbazine hydrochloride Drug: vincristine sulfate | Percentage of HIV-negative Patients With 2-year Progression-free Survival (PFS) Treated With 2 Initial Cycles of Adriamycin, Bleomycin, Vnblastine, and Dacarbazine (ABVD) Followed by Response-adapted Therapy Based on Interim FDG-PET Imaging. Percentage of HIV-negative Patients Who Are PET-positive After 2 Cycles of ABVD With 2-year PFS Percentage of HIV-negative Patients With 2-year Overall Survival (OS) Treated With 2 Initial Cycles of ABVD Followed by Response-Adapted Therapy Based on Interim FDG-PET Imaging Complete and Partial Response Rates for HIV-negative Patients Treated With Response- Adapted Therapy Based on FDG-PET Imaging After 2 Cycles of ABVD Number of HIV-negative Patients With Grade 3 Through Grade 5 Adverse Events That Are Related to Study Drug Percentage of HIV-positive Patients With 2-year Progression-free Survival (PFS) Treated With Initial 2 Cycles of Adriamycin, Bleomycin, Vnblastine, and Dacarbazine (ABVD) Followed by Response-adapted Therapy Based on Interim FDG-PET Imaging. Percentage of HIV-positive Patients With 5-year Overall Survival (OS) Treated With 2 Initial Cycles of ABVD Followed by Response-Adapted Therapy Based on Interim FDG-PET Imaging. Complete and Partial Response Rates for HIV-positive Patients Treated With Response-Adapted Therapy Based on FDG-PET | Phase 2                 | 371 | Jul-09    | April 2019 | 9 |
| G-CSF | NCT02043860 | Total Marrow Irradiation With High Dose Melphalan Prior to Autologous Transplant for Multiple Myeloma                                                                                     | Terminated             | Multiple Myeloma                                                                                                                                                                                                                                                                                                                                                                                                                                                                                                                                                                                                                                                                                                                                          | Radiation: Total Marrow Irradiation Procedure: Autologous Transplant Drug: Melphalan Drug:                                                                                                                                                        | Progression Free Survival No Results Due to 1 Subject Came Off Treatment Within 7 Days and 1 Subject Came Off Treatment Within 5 Days. Not Enough Data to Analyze                                                                                                                                                                                                                                                                                                                                                                                                                                                                                                                                                                                                                                                                                                                                                                                                                                                                                                                                                                                                                                                                                                                                                                                             | Phase 1                 | 3   | 10-Jan-14 | 14-Oct-19  |   |
| G-CSF | NCT02105116 | AML Therapy With Irradiated Allogeneic Cells                                                                                                                                              | Terminated             | Adult Acute Megakaryoblastic Leukemia (M7) Adult Acute Minimally Differentiated Myeloid Leukemia (M0) Adult Acute Monoblastic Leukemia (M5a) Adult Acute Monocytic Leukemia (M5b) Adult Acute Myeloblastic Leukemia With Maturation (M2) Adult Acute Myeloblastic Leukemia Without Maturation (M1) Adult Acute Myeloid Leukemia With 11q23 (MLL) Abnormalities Adult Acute Myeloid Leukemia With Del(5q) Adult Acute Myeloid Leukemia With Inv(16)(p13;q22) Adult Acute Myeloid Leukemia With t(16;16)(p13;q22) Adult Acute Myeloid Leukemia With t(8;21)(q22;q22) Adult Acute Myelomonocytic Leukemia (M4) Adult Erythroleukemia (M6a) Adult Pure Erythroid Leukemia (M6b) Recurrent Adult Acute Myeloid Leukemia Untreated Adult Acute Myeloid Leukemia | Drug: fludarabine phosphate Drug: cytarabine Biological: donor lymphocytes Other: laboratory biomarker analysis Drug: G-CSF                                                                                                                       | Adverse Events Related to Experimental Therapy Response Rate, Determined by Allogeneic Cell Therapy-related Mortality Response Rate, Determined by Duration of Complete Remission Progression Free Survival Probability for CR                                                                                                                                                                                                                                                                                                                                                                                                                                                                                                                                                                                                                                                                                                                                                                                                                                                                                                                                                                                                                                                                                                                                | Not Applicable          | 6   | Feb-14    | 26-Jul-18  |   |
| G-CSF | NCT00790647 | Melphalan, Bortezomib, and Stem Cell Transplant in Treating Patients With Primary Systemic Amyloidosis                                                                                    | Completed              | Multiple Myeloma                                                                                                                                                                                                                                                                                                                                                                                                                                                                                                                                                                                                                                                                                                                                          | Biological: filgrastim Drug: bortezomib Drug: melphalan Procedure: Stem Cell Infusion                                                                                                                                                             | Number of Participants With Hematologic Response Number of Participants Surviving at 100 Days From Transplant Number of Participants Surviving at 1 Year Number of Participants Surviving at 2 Years                                                                                                                                                                                                                                                                                                                                                                                                                                                                                                                                                                                                                                                                                                                                                                                                                                                                                                                                                                                                                                                                                                                                                          | Phase 2                 | 10  | Jun-08    | 6-Feb-17   |   |
| G-CSF | NCT01416389 | A Study of LY2523355 in Participants With Breast Cancer                                                                                                                                   | Completed              | Metastatic Breast Cancer                                                                                                                                                                                                                                                                                                                                                                                                                                                                                                                                                                                                                                                                                                                                  | Drug: LY2523355 Drug: ixabepilone Drug: pegfilgrastim Drug: filgrastim                                                                                                                                                                            | Change in Tumor Size (CTS) From Baseline to the End of Cycle 2 Percentage of Participants Achieving an Overall Response (Overall Response Rate) Progression-free Survival (PFS) Percentage of Participants Achieving a Clinical Benefit (Clinical Benefit Rate) Pharmacokinetics, Maximum Plasma Concentration (Cmax) of LY2523355 Pharmacokinetics, Maximum Plasma Concentration (Cmax) of                                                                                                                                                                                                                                                                                                                                                                                                                                                                                                                                                                                                                                                                                                                                                                                                                                                                                                                                                                   | Phase 2                 | 39  | Aug-11    | 18-Sep-19  |   |
| G-CSF | NCT00651937 | Trial of Two Stem Cell Doses To Reduce Transplant Induced Symptom Burden                                                                                                                  | Completed              | Multiple Myeloma Primary Amyloidosis                                                                                                                                                                                                                                                                                                                                                                                                                                                                                                                                                                                                                                                                                                                      | Drug: Melphalan Procedure: Stem Cell Infusion Behavioral: Questionnaires Drug: Granulocyte-colony stimulating factor (G-CSF) Procedure: Apheresis                                                                                                 | Mean Symptom Severity Burden as Measured by MDASI Scores                                                                                                                                                                                                                                                                                                                                                                                                                                                                                                                                                                                                                                                                                                                                                                                                                                                                                                                                                                                                                                                                                                                                                                                                                                                                                                      | Phase 2                 | 80  | Mar-08    | 14-Jan-20  |   |
| G-CSF | NCT00559104 | Combination Chemotherapy With or Without Total-Body Irradiation Followed By Stem Cell Transplant in Treating Patients With Non-Hodgkin Lymphoma                                           | Completed              | Lymphoma                                                                                                                                                                                                                                                                                                                                                                                                                                                                                                                                                                                                                                                                                                                                                  | Drug: carmustine Drug: cyclophosphamide Drug: etoposide Procedure: autologous hematopoietic stem cell transplantation Procedure: peripheral blood                                                                                                 | Progression Mortality Short-term and Long-term Treatment-related Toxicities                                                                                                                                                                                                                                                                                                                                                                                                                                                                                                                                                                                                                                                                                                                                                                                                                                                                                                                                                                                                                                                                                                                                                                                                                                                                                   | Phase 2                 | 60  | Oct-98    | 11-Aug-15  |   |
| G-CSF | NCT01538472 | Y Zevalin and BEAM in Autologous Stem Cell Transplantation (ASCT) for Lymphoma                                                                                                            | Completed              | Lymphoma                                                                                                                                                                                                                                                                                                                                                                                                                                                                                                                                                                                                                                                                                                                                                  | Drug: Y Zevalin Drug: In Zevalin Drug: Rituxan Drug: BCNU Drug: VP -16 Drug: Ara-C Drug: Melphalan Procedure: Stem Cell Infusion Drug: G-CSF                                                                                                      | Overall Survival Median 3-Year Overall Survival                                                                                                                                                                                                                                                                                                                                                                                                                                                                                                                                                                                                                                                                                                                                                                                                                                                                                                                                                                                                                                                                                                                                                                                                                                                                                                               | Phase 1 Phase 2         | 40  | Sep-03    | 11-Sep-14  |   |
| G-CSF | NCT00515411 | Study of Modified Docetaxel, Cisplatin, and Fluorouracil (mDCF) in Unresectable or Metastatic Gastric and Gastroesophageal Junction Adenocarcinoma                                        | Completed              | Gastroesophageal Junction Adenocarcinoma Gastric Cancer                                                                                                                                                                                                                                                                                                                                                                                                                                                                                                                                                                                                                                                                                                   | Drug: Docetaxel, Leucovorin, Fluorouracil, Cisplatin Drug: Docetaxel, Cisplatin, Fluorouracil, Neulasta, or Neupogen Drug: Docetaxel, Leukovorin, Fluorouracil, Cisplatin, Trastuzumab                                                            | 6 Month Progression Free Survival (PFS) Overall Survival                                                                                                                                                                                                                                                                                                                                                                                                                                                                                                                                                                                                                                                                                                                                                                                                                                                                                                                                                                                                                                                                                                                                                                                                                                                                                                      | Phase 2                 | 111 | 23-Oct-06 | 10-Dec-19  |   |
| G-CSF | NCT00176839 | Stem Cell Transplantation for Hematological Malignancies                                                                                                                                  | Terminated             | Leukemia, Lymphocytic, Acute AML MDS                                                                                                                                                                                                                                                                                                                                                                                                                                                                                                                                                                                                                                                                                                                      | Procedure: Stem Cell Transplant Drug: Busulfan Drug: Cyclophosphamide Drug: Melphalan Drug: G-CSF Drug: ATG                                                                                                                                       | Probability of Long-term Disease-free Survival (DFS) Probability of Engraftment Incidence of Acute Graft-versus-host Disease (GVHD) Incidence Chronic Graft-versus-host Disease (GVHD) Incidence of Regimen-related Toxicity 100 Days Post Transplant Incidence of                                                                                                                                                                                                                                                                                                                                                                                                                                                                                                                                                                                                                                                                                                                                                                                                                                                                                                                                                                                                                                                                                            | Phase 1 Phase 2 Phase 3 | 11  | 7-Jun-00  | 5-Dec-17   |   |

|       |             |                                                                                                                                                                                                                              |                        |                                                                                                                                                                                                                                                                 |                                                                                                                                                                                                                                          |                                                                                                                                                                                                                                                                                                                                                                                                                                                                                                                                                                                                                                                                                           |                 |     |            |           |
|-------|-------------|------------------------------------------------------------------------------------------------------------------------------------------------------------------------------------------------------------------------------|------------------------|-----------------------------------------------------------------------------------------------------------------------------------------------------------------------------------------------------------------------------------------------------------------|------------------------------------------------------------------------------------------------------------------------------------------------------------------------------------------------------------------------------------------|-------------------------------------------------------------------------------------------------------------------------------------------------------------------------------------------------------------------------------------------------------------------------------------------------------------------------------------------------------------------------------------------------------------------------------------------------------------------------------------------------------------------------------------------------------------------------------------------------------------------------------------------------------------------------------------------|-----------------|-----|------------|-----------|
| G-CSF | NCT00667615 | Trial of Vorinostat in Combination With Cyclophosphamide, Etoposide, Prednisone and Rituximab for Elderly Patients With Relapsed Diffuse Large B-Cell Lymphoma (DLBCL)                                                       | Completed              | Hodgkin's Disease Lymphoma                                                                                                                                                                                                                                      | Drug: rituximab, cyclophosphamide, etoposide, prednisone, vorinostat and QOL questionnaire, peg-filgrastim or filgrastim                                                                                                                 | Maximum Tolerated Dose (MTD) of Vorinostat Given Orally for 10 Days in Combination With Cyclophosphamide, Etoposide, Prednisone and Rituximab for Elderly Patients With Relapsed Diffuse Large B-cell Lymphoma Complete Response Rate to Rituximab and a Combination of Vorinostat With Cyclophosphamide, Etoposide, and Prednisone in Elderly Patients With Relapsed Diffuse Large B-cell Lymphoma Who Aren't Candidates for Autologous Transplantation (AHCT) Following Carfilzomib (CFZ) Therapy Evaluate the Effects of the Addition of Carfilzomib (CFZ) in the Early Post-Pre-autologous Hematopoietic Cell Transplantation (AHCT) Period on the Response Rate at Day 100 Post-AHCT | Phase 1 Phase 2 | 30  | April 2008 | 5-Jan-18  |
| G-CSF | NCT01658904 | Carfilzomib and Stem Cell Transplant for Plasma Cell Myeloma                                                                                                                                                                 | Terminated             | Multiple Myeloma Leukemia, Plasma Cell                                                                                                                                                                                                                          | Drug: Carfilzomib Drug: Melphalan Drug: Filgrastim                                                                                                                                                                                       | Engraftment Failure Transplant Related Mortality Number of Participants With Adverse Events Evaluate the Immune Reconstitution Post-Pre-autologous Hematopoietic Cell Transplantation (AHCT) Following Carfilzomib (CFZ) Therapy Evaluate the Effects of the Addition of Carfilzomib (CFZ) in the Early Post-Pre-autologous Hematopoietic Cell Transplantation (AHCT) Period on the Response Rate at Day 100 Post-AHCT                                                                                                                                                                                                                                                                    | Phase 1 Phase 2 | 3   | Jul-12     | 1-Jun-16  |
| G-CSF | NCT01518153 | Planned Donor Lymphocyte Infusion (DLI) After Allogeneic Stem Cell Transplantation (SCT)                                                                                                                                     | Terminated             | Leukemia Lymphoma Myeloma Myeloproliferative Diseases                                                                                                                                                                                                           | Drug: Fludarabine Drug: Melphalan Drug: Alemtuzumab Procedure: Stem Cell Infusion Drug: Tacrolimus Drug: Methotrexate Drug: G-CSF Procedure: Low Dose Donor T-Cells Procedure: High Dose Donor T-Cells                                   | Success Rate Overall Survival (OS)                                                                                                                                                                                                                                                                                                                                                                                                                                                                                                                                                                                                                                                        | Phase 2         | 16  | Feb-12     | 17-Mar-16 |
| G-CSF | NCT00302003 | Combination Chemotherapy Followed by Radiation Therapy in Treating Young Patients With Newly Diagnosed Hodgkin's Lymphoma                                                                                                    | Completed              | Childhood Favorable Prognosis Hodgkin Lymphoma Childhood Lymphocyte Depletion Hodgkin Lymphoma Childhood Mixed Cellularity Hodgkin Lymphoma Childhood Nodular Sclerosis Hodgkin Lymphoma Stage I Childhood Hodgkin Lymphoma Stage II Childhood Hodgkin Lymphoma | Radiation: radiation therapy Drug: doxorubicin hydrochloride Drug: vincristine sulfate Drug: prednisone Drug: cyclophosphamide Drug: ifosfamide Drug: vinorelbine tartrate Drug: dexamethasone Drug: etoposide                           | Event Free Survival Without Receiving Radiation Therapy (EFSNoRT) Intensive Therapy Free Survival (ITFS) Event Free Survival (EFS) Overall Survival                                                                                                                                                                                                                                                                                                                                                                                                                                                                                                                                       | Phase 3         | 287 | Feb-06     | 6-Aug-19  |
| G-CSF | NCT00238433 | Busulfan, Melphalan, and Thiotepa in Treating Patients Who Are Undergoing an Autologous Stem Cell Transplant for Hodgkin's or Non-                                                                                           | Completed              | Lymphoma                                                                                                                                                                                                                                                        | Biological: filgrastim Drug: busulfan Drug: melphalan Drug: thiotepa Procedure: bone marrow ablation with stem cell support Procedure: peripheral blood stem                                                                             | Disease-Free Survival Therapy-Related Toxicities                                                                                                                                                                                                                                                                                                                                                                                                                                                                                                                                                                                                                                          | Phase 2         | 37  | Mar-05     | 27-Sep-17 |
| G-CSF | NCT00085202 | Treatment of Patients With Newly Diagnosed Medulloblastoma, Supratentorial Primitive Neuroectodermal Tumor, or Atypical Teratoid Rhabdoid Tumor                                                                              | Active, not recruiting | Brain and Central Nervous System Tumors                                                                                                                                                                                                                         | Biological: filgrastim Drug: cisplatin Drug: cyclophosphamide Drug: vincristine Procedure: autologous hematopoietic stem cell transplantation Radiation: radiation therapy                                                               | Progression-Free Survival (PFS) in ERBB2-Negative Tumors Compared to ERBB2-Positive Tumors Progression-Free Survival (PFS) Compared Between ERBB2 Assessment and Risk Group Frequency of Mutations Associated With SHH and WNT Tumors Reading Decoding Composite Scores in the Intervention and Standard of Care Groups Number of Average Risk Patients Whose Treatment Failure Included the Posterior Fossa Mean RT Dose to Specified Target Tissue Volume by Rate and Pattern of Failure.                                                                                                                                                                                               | Phase 3         | 416 | Aug-03     | 6-Jan-20  |
| G-CSF | NCT00038610 | Study of Hyper-CVAD Plus Imatinib Mesylate for Philadelphia-Positive Acute Lymphocytic Leukemia                                                                                                                              | Completed              | Leukemia                                                                                                                                                                                                                                                        | Drug: Imatinib Mesylate Drug: Cyclophosphamide Drug: Doxorubicin Drug: Vincristine Drug: Dexamethasone Drug: Methotrexate Drug: Cytarabine Drug: Mesna Drug: G-CSF                                                                       | Response To Induction Therapy With Hyper-CVAD Plus Imatinib Mesylate Disease-Free Survival Rate at 2-year and 5-year Overall Survival Rate at 2-year and 5-year.                                                                                                                                                                                                                                                                                                                                                                                                                                                                                                                          | Phase 2         | 54  | Mar-01     | 18-Sep-15 |
| G-CSF | NCT00503984 | A Phase I/II Study of Azacitidine, Docetaxel, and Prednisone for Metastatic Prostate Cancer Patients                                                                                                                         | Terminated             | Prostate Cancer Pain                                                                                                                                                                                                                                            | Drug: Azacitidine Drug: Docetaxel Drug: Prednisone Genetic: GADD45a methylation and expression analysis Drug: Pegfilgrastim Drug: Filgrastim                                                                                             | Phase I - Recommended Phase Two Dose (RPTD) of Azacitidine and Docetaxel in Combination With Prednisone. (Azacitidine and Docetaxel) Phase I - Recommended Phase Two Dose (RPTD) of Azacitidine and Docetaxel in Combination With Prednisone. (Prednisone) Number of Participants Achieving Prostate-specific Antigen (PSA) Response Number of Participants Achieving Complete Response (CR) or Partial Response (CR) to Protocol Therapy Duration of Response Progression-Free Survival (PFS) Overall Survival (OS) Number of Participants Experiencing Adverse Events After                                                                                                             | Phase 1 Phase 2 | 22  | May-07     | 9-Jun-16  |
| G-CSF | NCT02199041 | Combined T Cell Depleted Haploidentical Peripheral Blood Stem Cell and Unrelated Umbilical Cord Blood Transplantation in Patients With Hematologic Malignancies Using a Total Lymphoid Irradiation Based Preparative Regimen | Terminated             | Hematological Malignancies                                                                                                                                                                                                                                      | Drug: Cyclophosphamide Drug: Thiotepa Drug: Fludarabine Drug: Melphalan Drug: Mesna Biological: G-CSF Drug: Mycophenolate mofetil Drug: Tacrolimus Drug: Methylprednisolone Radiation: Total lymphoid irradiation Biological: Lymphocyte | Number of Participants With Neutrophil Engraftment Number of Participants With Malignant Relapse Number of Participants With Event-free Survival (EFS) Number of Participants With Overall Survival (OS) Number of Participants by Severity With Acute Graft Versus Host Disease (GVHD) in the First 100 Days After HCT Number of Participants by Severity With Chronic Graft Versus Host Disease (GVHD) in the First 100 Days After HCT Number of Participants With Secondary Graft Failure Number of Participants With Transplant-related Mortality (TRM) Number of Participants With                                                                                                   | Phase 2         | 24  | 11-Jul-14  | 7-Feb-18  |
| G-CSF | NCT00014495 | Chemotherapy and Monoclonal Antibody Therapy in Treating Patients With Advanced Myeloid Cancer                                                                                                                               | Completed              | Leukemia Myelodysplastic Syndromes Myelodysplastic/Myeloproliferative Neoplasms                                                                                                                                                                                 | Biological: filgrastim Drug: cytarabine Radiation: bismuth Bi213 monoclonal antibody M195                                                                                                                                                | Maximum Tolerated Dose                                                                                                                                                                                                                                                                                                                                                                                                                                                                                                                                                                                                                                                                    | Phase 1 Phase 2 | 32  | Nov-00     | 22-Jan-16 |
| G-CSF | NCT00063934 | Oblimersen Plus Doxorubicin and Docetaxel in Treating Patients With Metastatic or Locally Advanced Breast Cancer                                                                                                             | Terminated             | Male Breast Cancer Stage IIIA Breast Cancer Stage IIIB Breast Cancer Stage IIIC Breast Cancer Stage IV Breast Cancer                                                                                                                                            | Biological: oblimersen sodium Drug: doxorubicin hydrochloride Drug: docetaxel Biological: filgrastim Biological: pegfilgrastim Procedure: therapeutic conventional surgery Other: pharmacological study Other: laboratory                | Number of Participant With Toxicities Number of Participants With Pathologic Complete Response (pCR) Clinical Imaging Responses Bcl-2 Expression in Breast Cancer Tissue                                                                                                                                                                                                                                                                                                                                                                                                                                                                                                                  | Phase 1 Phase 2 | 31  | May-03     | 5-Mar-19  |
| G-CSF | NCT00398047 | Azacitidine, Darbepoetin Alfa, and Erythropoietin and Filgrastim (G-CSF) in Treating Patients With Myelodysplastic Syndromes                                                                                                 | Terminated             | Leukemia Myelodysplastic Syndromes                                                                                                                                                                                                                              | Drug: Azacitidine and Hematopoietic Growth Factors                                                                                                                                                                                       | Number of Participants With Complete Response Rate of Major Hematological Improvement Minor Hematological Improvements Time to Progression to Acute Myeloid Leukemia (Blast $\geq$ 20%) or Death Overall Survival Change in Bone Marrow Apoptosis Expression of p53 and p21                                                                                                                                                                                                                                                                                                                                                                                                               | Phase 2         | 3   | Sep-06     | 6-Sep-18  |
| G-CSF | NCT00349778 | High-Dose Sequential Therapy and Single Autologous Transplantation for Multiple Myeloma                                                                                                                                      | Completed              | Multiple Myeloma                                                                                                                                                                                                                                                | Drug: Cyclophosphamide Drug: Etoposide Drug: Melphalan Drug: Carmustine Drug: Filgrastim                                                                                                                                                 | Number of Participants With Pulmonary Toxicity Overall Participant Survival (OS) Number of Participants That Relapse After Autologous Transplantation                                                                                                                                                                                                                                                                                                                                                                                                                                                                                                                                     | Phase 2         | 102 | Aug-06     | 12-Dec-17 |

|       |             |                                                                                                                                                                                                  |                        |                                                                                                                                                                                                                                                                                                                                                                                                                                                                                                                                            |                                                                                                                                                                                                                                                                                                                                                                                                                                               |                                                                                                                                                                                                                                                                                                                                                                                                                                                                                                                                                                                                                                                          |         |     |            |           |
|-------|-------------|--------------------------------------------------------------------------------------------------------------------------------------------------------------------------------------------------|------------------------|--------------------------------------------------------------------------------------------------------------------------------------------------------------------------------------------------------------------------------------------------------------------------------------------------------------------------------------------------------------------------------------------------------------------------------------------------------------------------------------------------------------------------------------------|-----------------------------------------------------------------------------------------------------------------------------------------------------------------------------------------------------------------------------------------------------------------------------------------------------------------------------------------------------------------------------------------------------------------------------------------------|----------------------------------------------------------------------------------------------------------------------------------------------------------------------------------------------------------------------------------------------------------------------------------------------------------------------------------------------------------------------------------------------------------------------------------------------------------------------------------------------------------------------------------------------------------------------------------------------------------------------------------------------------------|---------|-----|------------|-----------|
| G-CSF | NCT01458288 | A Study to Evaluate the Safety, Pharmacokinetics, and Hematopoietic Stem Cell Mobilization of TG-0054 Alone or in Combination With G-CSF in Patients With Multiple Myeloma, Non-Hodgkin Lymphoma | Completed              | Multiple Myeloma Non-hodgkin's Lymphoma Hodgkin's Disease                                                                                                                                                                                                                                                                                                                                                                                                                                                                                  | Drug: TG-0054                                                                                                                                                                                                                                                                                                                                                                                                                                 | Number of Patients Achieving the CD34+ Hematopoietic Stem Cell (HSC) Mobilization Target of $\geq 2.5 \times 1000000$ Cells/kg the Average Number of Leukapheresis Sessions Circulating CD34+ Cell Count in Peripheral Blood                                                                                                                                                                                                                                                                                                                                                                                                                             | Phase 2 | 12  | Oct-12     | 26-Jun-18 |
| G-CSF | NCT03018223 | Calcineurin Inhibitor-Free GVHD Prevention Regimen After Related Haplo PB SCT                                                                                                                    | Active, not recruiting | Non-Hodgkin's Lymphoma Acute Leukemia in Remission Chronic Myeloid Leukemia Primary Myelofibrosis Chronic Myelomonocytic Leukemia Myelodysplastic Syndromes Hodgkin Lymphoma Multiple Myeloma                                                                                                                                                                                                                                                                                                                                              | Drug: Fludarabine Drug: Busulfan Drug: Cyclophosphamide Radiation: Total body irradiation (TBI) Procedure: Peripheral Blood Hematopoietic Cell Transplantation (HCT) Drug: Sirolimus (SIR) Drug: Mycophenolate mofetil (MMF) Drug: Granulocyte-colony stimulating factor (G-                                                                                                                                                                  | Incidence of Grade II-IV Acute Graft vs. Host Disease (GVHD) Incidence of Chronic GVHD Overall Survival (OS) Progression Free Survival (PFS)                                                                                                                                                                                                                                                                                                                                                                                                                                                                                                             | Phase 1 | 32  | 10-Jan-17  | 21-Jan-20 |
| G-CSF | NCT00281879 | Donor Stem Cell Transplant or Donor White Blood Cell Infusions in Treating Patients With Hematologic Cancer                                                                                      | Terminated             | Chronic Myeloproliferative Disorders Leukemia Lymphoma Multiple Myeloma and Plasma Cell Neoplasm Myelodysplastic Syndromes Myelodysplastic/Myeloproliferative Neoplasms Unusual Cancers of Childhood                                                                                                                                                                                                                                                                                                                                       | Biological: anti-thymocyte globulin Biological: filgrastim Drug: busulfan Drug: carmustine Drug: cyclophosphamide Drug: cyclosporine Drug: cytarabine Drug: etoposide Drug: fludarabine phosphate Drug: melphalan Drug: methotrexate Drug: methylprednisolone Drug: mycophenolate mofetil Drug: tacrolimus Procedure: peripheral blood stem cell transplantation Procedure: umbilical cord blood transplantation Radiation: radiation therapy | Number of Participants With Disease Free Survival (DFS).                                                                                                                                                                                                                                                                                                                                                                                                                                                                                                                                                                                                 | Phase 2 | 200 | Feb-06     | 27-Sep-17 |
| G-CSF | NCT00253435 | N2001-02: I-MIBG With Intensive Chemotherapy and Autologous Stem Cell Rescue for High-Risk Neuroblastoma                                                                                         | Completed              | Neuroblastoma                                                                                                                                                                                                                                                                                                                                                                                                                                                                                                                              | Biological: Filgrastim Drug: Carboplatin Drug: Etoposide Drug: Melphalan Procedure: Peripheral blood stem cell infusion Radiation: 131I-                                                                                                                                                                                                                                                                                                      | Response (Complete Response, Very Good Partial Response, and Partial Response) at 60-days Post Stem Cell Infusion Event-free Survival (EFS) at 3 Years Engraftment DLT Dose Limiting Veno-occlusive Disease (VOD) / Sinusoidal Obstruction Syndrome SOS                                                                                                                                                                                                                                                                                                                                                                                                  | Phase 2 | 50  | Sep-05     | 24-Aug-16 |
| G-CSF | NCT00072384 | Systemic Chemotherapy and Subtenon Carboplatin, and Local Ophthalmic Therapy in Children With Intraocular Retinoblastoma                                                                         | Terminated             | Intraocular Retinoblastoma                                                                                                                                                                                                                                                                                                                                                                                                                                                                                                                 | Drug: liposomal vincristine sulfate Procedure: cryosurgery Procedure: laser surgery Drug: carboplatin Drug: etoposide Biological: filgrastim                                                                                                                                                                                                                                                                                                  | Group D Eyes - Treatment Failure Within One Year Group C Eyes - Treatment Failure Within One Year Event-free Survival (EFS) Toxicity Associated With Chemotherapy Patterns of Failure for Group C and Group D in Terms of Vitreous vs Patterns of Failure for Group C and Group D in Terms of Vitreous vs Retinal vs Both as Sites of Recurrence Patterns of Treatment Failure vs. no Treatment Failure for Group C                                                                                                                                                                                                                                      | Phase 3 | 30  | April 2007 | 19-Sep-18 |
| G-CSF | NCT02421939 | A Study of ASP2215 Versus Salvage Chemotherapy in Patients With Relapsed or Refractory Acute Myeloid Leukemia (AML) With FMS-like Tyrosine Kinase (FLT3) Mutation                                | Active, not recruiting | Leukemia, Acute Myeloid (AML)                                                                                                                                                                                                                                                                                                                                                                                                                                                                                                              | Drug: gilteritinib Drug: LoDAC (Low Dose Cytarabine) Drug: Azacitidine Drug: MEC (Mitoxantrone, Etoposide, Cytarabine) Drug: FLAG-IDA (Granulocyte-Colony Stimulating Factor (G-CSF), Fludarabine, Cytarabine, Idarubicin)                                                                                                                                                                                                                    | Duration of Overall Survival (OS) Percentage of Participants With Complete Remission and Complete Remission With Partial Hematological Recovery (CR/CRh) in the Gilteritinib Arm Duration of Event-Free Survival (EFS) Percentage of Participants With Complete Remission (CR) Rate Duration of Leukemia-Free Survival (LFS) Duration of Remission Percentage of Participants With Composite Complete Remission (CRc Rate) Percentage of Participants Who Underwent Hematopoietic Stem Cell Transplant Change From Baseline in Brief Fatigue Inventory (BFI) Percentage of Participants With Complete Remission (CR) With Partial Hematological Recovery | Phase 3 | 371 | 20-Oct-15  | 17-Oct-19 |
| G-CSF | NCT00467051 | Combination Chemotherapy in Treating Young Patients With Recurrent or Resistant Malignant Germ Cell Tumors                                                                                       | Completed              | Childhood Extracranial Germ Cell Tumor Childhood Extragonadal Malignant Germ Cell Tumor Childhood Malignant Ovarian Germ Cell Tumor Childhood Malignant Testicular Germ Cell Tumor Ovarian Choriocarcinoma Ovarian Embryonal Carcinoma Ovarian Yolk Sac Tumor Recurrent Childhood Malignant Germ Cell Tumor Recurrent Malignant Testicular Germ Cell Tumor Recurrent Ovarian Germ Cell Tumor Testicular Choriocarcinoma Testicular Embryonal Carcinoma Testicular Mixed Choriocarcinoma and Embryonal Carcinoma Testicular Mixed Embryonal | Drug: Carboplatin Biological: Filgrastim Drug: Ifosfamide Other: Laboratory Biomarker Analysis Drug: Paclitaxel                                                                                                                                                                                                                                                                                                                               | Response Rate as Measured by Response Evaluation Criteria in Solid Tumors (RECIST) Criteria The Number of Patients Who Experience at Least One Grade 3 or Higher CTC Version 4 Toxicity.                                                                                                                                                                                                                                                                                                                                                                                                                                                                 | Phase 2 | 20  | 5-Nov-07   | 29-Aug-18 |
| G-CSF | NCT00185614 | Non-myeloablative Allogeneic Transplantation for the Treatment of Multiple Myeloma                                                                                                               | Completed              | Blood Cancer Multiple Myeloma                                                                                                                                                                                                                                                                                                                                                                                                                                                                                                              | Procedure: Autologous hematopoietic cell transplant (Auto-HCT) Procedure: Allogeneic hematopoietic cell transplant (Allo-HCT) Drug: Cyclophosphamide Drug: Filgrastim Drug: Melphalan Radiation: Total body irradiation (TBI) Procedure: Cyclosporine (CSP) Drug: Mycophenolate                                                                                                                                                               | Event-free Survival (EFS) Relapse Rate Overall Survival (OS) Acute Graft-vs-Host-Disease (aGvHD) Chronic Graft-vs-Host-Disease (cGvHD)                                                                                                                                                                                                                                                                                                                                                                                                                                                                                                                   | Phase 2 | 63  | Aug-00     | 18-Jan-18 |

|       |             |                                                                                                                                                      |            |                                                                                                                                                                                                                      |                                                                                                                                                                                                                                                                                                        |                                                                                                                                                                                                                                                                                                                                                         |         |    |                |           |
|-------|-------------|------------------------------------------------------------------------------------------------------------------------------------------------------|------------|----------------------------------------------------------------------------------------------------------------------------------------------------------------------------------------------------------------------|--------------------------------------------------------------------------------------------------------------------------------------------------------------------------------------------------------------------------------------------------------------------------------------------------------|---------------------------------------------------------------------------------------------------------------------------------------------------------------------------------------------------------------------------------------------------------------------------------------------------------------------------------------------------------|---------|----|----------------|-----------|
| G-CSF | NCT00041132 | S0213 Chemotherapy Plus Rituximab in Treating Patients With Mantle Cell Lymphoma                                                                     | Completed  | Lymphoma                                                                                                                                                                                                             | Biological: rituximab Drug: cyclophosphamide Drug: cytarabine Drug: dexamethasone Drug: doxorubicin Drug: leucovorin Drug: filgrastim                                                                                                                                                                  | Progression-free Survival Response Overall Survival                                                                                                                                                                                                                                                                                                     | Phase 2 | 56 | Sep-02         | 1-Nov-12  |
| G-CSF | NCT00477971 | Low-Dose Melphalan and Dexamethasone Compared With High-Dose Melphalan Followed By Autologous Stem Cell Transplant in Treating Patients With Primary | Completed  | Multiple Myeloma and Plasma Cell Neoplasm                                                                                                                                                                            | Biological: filgrastim Drug: dexamethasone Drug: melphalan Procedure: autologous hematopoietic stem cell transplantation                                                                                                                                                                               | Hematologic Response Rate 3 Year Overall Survival Organ Response to Treatment                                                                                                                                                                                                                                                                           | Phase 3 | 89 | Oct-05         | 17-May-16 |
| G-CSF | NCT00004088 | Combination Chemo, Peripheral Stem Cell Transplant, Biological Therapy, Pamidronate and Thalidomide for Multiple Myeloma                             | Completed  | Multiple Myeloma and Plasma Cell Neoplasm                                                                                                                                                                            | Biological: filgrastim Biological: recombinant interferon alfa Drug: busulfan Drug: cyclophosphamide Drug: melphalan Drug: pamidronate disodium Drug: thalidomide Procedure: peripheral blood stem cell transplantation                                                                                | Best Response Prior to Tandem Autologous Stem Cell Transplant Response After Tandem Autologous Stem Cell Transplant Three-year Overall Survival Progression-free Survival Best Response at 6 Months Post Tandem Autologous Stem Cell Transplant Best Response After Tandem Autologous Stem Cell Transplant and Maintenance                              | Phase 2 | 77 | April 13, 1999 | 2-Jul-19  |
| G-CSF | NCT02259348 | Repeat Transplantation for Relapsed or Refractory Hematologic Malignancies Following Prior Transplantation                                           | Terminated | Acute Lymphoblastic Leukemia (ALL) Acute Myeloid Leukemia (AML) Myeloid Sarcoma Chronic Myelogenous Leukemia (CML) Juvenile Myelomonocytic Leukemia (JMML) Myelodysplastic Syndrome (MDS) Non-Hodgkin Lymphoma (NHL) | Drug: Cyclophosphamide Drug: Fludarabine Biological: G-CSF Biological: Interleukin-2 Drug: Melphalan Drug: Thiotepea Drug: Rituximab Biological: Natural killer cell therapy Biological: T-cell depleted HPC transplant Biological: CD45RA-depleted HPC transplant                                     | Percentage of Participants Engrafted by Day 42 Post-transplant Incidence of Malignant Relapse Event-free Survival (EFS) Overall Survival (OS) Incidence and Severity of Acute GvHD Incidence and Severity of Chronic GvHD Rate of Transplant-related Mortality (TRM)                                                                                    | Phase 2 | 12 | Oct-14         | 30-May-17 |
| G-CSF | NCT00481832 | Autologous Followed by Non-myeloablative Allogeneic Transplantation for Non-Hodgkin's Lymphoma                                                       | Terminated | Lymphoma, Non-Hodgkin                                                                                                                                                                                                | Drug: Cyclophosphamide Drug: BCNU Drug: Etoposide Drug: Filgrastim Drug: Antithymocyte globulin Drug: Cyclosporine Drug: Mycophenolate mofetil Drug: Rituximab Procedure: Autologous hematopoietic stem cell transplantation (auto-HSCT) Procedure: Allogeneic hematopoietic stem cell transplantation | Event-free Survival (EFS) Incidence of Chemotherapy-associated Pneumonitis Relapse Rate Overall Survival (OS) Incidence of Acute Graft Versus Host Disease (GvHD) Incidence of Chronic Graft Versus Host Disease (GvHD) Overall Mortality Rate Median Time to Neutrophil Engraftment Achieving Full Donor Chimerism Median Time to Platelet Engraftment | Phase 2 | 50 | Jan-07         | 14-Feb-18 |
| G-CSF | NCT00189137 | Evaluation of Side Effects and Relative Activity of Two Chemotherapy Regimens in the                                                                 | Completed  | Sarcoma, Soft Tissue                                                                                                                                                                                                 | Drug: ifosfamide and doxorubicin vs gemcitabine and docetaxel                                                                                                                                                                                                                                          | Percentage of Patients Hospitalized in Each Arm. The Percentage of Patients Alive Without Disease at 2 Years                                                                                                                                                                                                                                            | Phase 2 | 84 | Aug-04         | 7-Dec-15  |
| G-CSF | NCT00433537 | Combination Chemotherapy and Rituximab in Treating Patients With Untreated Mantle Cell Lymphoma                                                      | Completed  | Contiguous Stage II Mantle Cell Lymphoma Noncontiguous Stage II Mantle Cell Lymphoma Stage I Mantle Cell Lymphoma Stage III Mantle Cell Lymphoma Stage IV Mantle Cell Lymphoma                                       | Drug: bortezomib Biological: rituximab Drug: cyclophosphamide Drug: doxorubicin hydrochloride Drug: vincristine Drug: dexamethasone Biological: filgrastim Biological: pegfilgrastim Procedure: Autologous stem cell transplantation (ASCT)                                                            | Complete Response (CR) Rate 2-year Progression-free Survival (PFS) 3-year Overall Survival (OS)                                                                                                                                                                                                                                                         | Phase 2 | 77 | May-07         | 30-Oct-14 |

|       |             |                                                                                                                                                                                                   |                        |                                                                                                                                                                                                                                                                  |                                                                                                                                                                                                                                                                                                                               |                                                                                                                                                                                                                                                                                                                                                                                                                                                                                                                                                                                                                                                                                                                                                                                                                                                                                                                                                                                                                                                                                                                                                                                                                                                                                                                                                                                                                                                                                                                                                                                                                                                                                                                                                                                                                                                                                                                                                                                                                                                                                                                                                                                                                                                                                                                                                                                                                                                                                                                                                                                                                                                                                                                                                                                                                                                                |         |     |           |           |
|-------|-------------|---------------------------------------------------------------------------------------------------------------------------------------------------------------------------------------------------|------------------------|------------------------------------------------------------------------------------------------------------------------------------------------------------------------------------------------------------------------------------------------------------------|-------------------------------------------------------------------------------------------------------------------------------------------------------------------------------------------------------------------------------------------------------------------------------------------------------------------------------|----------------------------------------------------------------------------------------------------------------------------------------------------------------------------------------------------------------------------------------------------------------------------------------------------------------------------------------------------------------------------------------------------------------------------------------------------------------------------------------------------------------------------------------------------------------------------------------------------------------------------------------------------------------------------------------------------------------------------------------------------------------------------------------------------------------------------------------------------------------------------------------------------------------------------------------------------------------------------------------------------------------------------------------------------------------------------------------------------------------------------------------------------------------------------------------------------------------------------------------------------------------------------------------------------------------------------------------------------------------------------------------------------------------------------------------------------------------------------------------------------------------------------------------------------------------------------------------------------------------------------------------------------------------------------------------------------------------------------------------------------------------------------------------------------------------------------------------------------------------------------------------------------------------------------------------------------------------------------------------------------------------------------------------------------------------------------------------------------------------------------------------------------------------------------------------------------------------------------------------------------------------------------------------------------------------------------------------------------------------------------------------------------------------------------------------------------------------------------------------------------------------------------------------------------------------------------------------------------------------------------------------------------------------------------------------------------------------------------------------------------------------------------------------------------------------------------------------------------------------|---------|-----|-----------|-----------|
| G-CSF | NCT00352027 | Chemotherapy With Low-Dose Radiation for Pediatric Hodgkin Lymphoma                                                                                                                               | Active, not recruiting | Hodgkin's Lymphoma                                                                                                                                                                                                                                               | Drug: Adriamycin@ Drug: Vinblastine Drug: Nitrogen Mustard Drug: Cyclophosphamide Drug: Bleomycin Drug: Etoposide Drug: Prednisone Biological: G-CSF Procedure: Radiotherapy                                                                                                                                                  | 3-year Event-Free Survival Probability Disease Failure Rate Within Radiation Fields Local and Distant Failure for Children Treated With Tailored-field Radiation Prognostic Factors for Treatment Failure: Age Describe Toxicities, Particularly the Frequency and Severity of Late Effects of Therapy Patient Quality of Life (QoL), PedsQL v.4.0: Total Score Patient Quality of Life (QoL), PedsQL v.4.0: Physical Functioning Patient Quality of Life (QoL), PedsQL v.4.0: Psychosocial Health Patient Quality of Life (QoL), PedsQL v.4.0: Emotional Functioning Patient Quality of Life (QoL), PedsQL v.4.0: Social Functioning Patient Quality of Life (QoL), PedsQL v.4.0: School Functioning Patient Quality of Life (QoL), PedsQL v.3.0: Total Score Patient Quality of Life (QoL), PedsQL v.3.0: Pain and Hurt Patient Quality of Life (QoL), PedsQL v.3.0: Nausea Patient Quality of Life (QoL), PedsQL v.3.0: Procedural Anxiety Patient Quality of Life (QoL), PedsQL v.3.0: Treatment Anxiety Patient Quality of Life (QoL), PedsQL v.3.0: Worry Patient Quality of Life (QoL), PedsQL v.3.0: Cognitive Problems Patient Quality of Life (QoL), PedsQL v.3.0: Perceived Physical Appearance Patient Quality of Life (QoL), PedsQL v.3.0: Communication Patient Quality of Life (QoL), Symptom Distress Scale Parent Proxy Quality of Life (QoL), PedsQL v.4.0: Total Score Parent Proxy Quality of Life (QoL), PedsQL v.4.0: Physical Functioning Parent Proxy Quality of Life (QoL), PedsQL v.4.0: Psychosocial Health Parent Proxy Quality of Life (QoL), PedsQL v.4.0: Emotional Functioning Parent Proxy Quality of Life (QoL), PedsQL v.4.0: Social Functioning Parent Proxy Quality of Life (QoL), PedsQL v.4.0: School Functioning Parent Proxy Quality of Life (QoL), PedsQL v.3.0: Total Score Parent Proxy Quality of Life (QoL), PedsQL v.3.0: Pain and Hurt Parent Proxy Quality of Life (QoL), PedsQL v.3.0: Nausea Parent Proxy Quality of Life (QoL), PedsQL v.3.0: Procedural Anxiety Parent Proxy Quality of Life (QoL), PedsQL v.3.0: Treatment Anxiety Parent Proxy Quality of Life (QoL), PedsQL v.3.0: Worry Parent Proxy Quality of Life (QoL), PedsQL v.3.0: Cognitive Problems Parent Proxy Quality of Life (QoL), PedsQL v.3.0: Perceived Physical Appearance Parent Proxy Quality of Life (QoL), PedsQL v.3.0: Communication Correlation of Agreement Between Patient QoL and Parent Proxy QoL at Multiple Time Points, PedsQL v.4.0: Total Score Correlation of Agreement Between Patient QoL and Parent Proxy QoL at Multiple Time Points, PedsQL v.4.0: Physical Functioning Correlation of Agreement Between Patient QoL and Parent Proxy QoL at Multiple Time Points, PedsQL v.4.0: Psychosocial Health Correlation of Agreement Between Patient QoL and Parent Proxy QoL at Multiple Time Points, PedsQL v.4.0: | Phase 2 | 81  | 20-Jul-06 | 27-Jan-20 |
| G-CSF | NCT00566696 | Mismatched Family Member Donor Transplantation for Children and Young Adults With High Risk Hematological Malignancies                                                                            | Completed              | Leukemia, Acute Lymphocytic (ALL) Leukemia, Myeloid, Acute (AML) Leukemia, Myeloid, Chronic (CML) Juvenile Myelomonocytic Leukemia (JMML) Hemoglobinuria, Paroxysmal Nocturnal (PNH) Hodgkin Lymphoma Lymphoma, Non-Hodgkin (NHL) Myelodysplastic Syndrome (MDS) | Device: CliniMACS Procedure: Stem cell transplantation Drug: Fludarabine Drug: Thioplex ®  Drug: L-phenylalanine mustard Drug: Mycophenolate mofetil Drug: Rituxan ™  Drug: Alemtuzumab Drug: Cyclophosphamide Drug: Anti-thymocyte globulin (Rabbit) Drug: G-CSF Drug: Muromonab                                             | Event-free Survival (EFS) Overall Survival (OS) Disease-Free Survival (DFS) Incidence of Non-hematologic Regimen-related Toxicities Incidence of Regimen-related Mortality To Estimate the Cumulative Incidence of Relapse for Research Participants Who Receive This Study Treatment. To Estimate the Rate of Overall Grade III-IV Acute GVHD, and the Rate and Severity of Chronic GVHD in Research Participants.                                                                                                                                                                                                                                                                                                                                                                                                                                                                                                                                                                                                                                                                                                                                                                                                                                                                                                                                                                                                                                                                                                                                                                                                                                                                                                                                                                                                                                                                                                                                                                                                                                                                                                                                                                                                                                                                                                                                                                                                                                                                                                                                                                                                                                                                                                                                                                                                                                            | Phase 2 | 73  | 14-Dec-07 | 13-Nov-19 |
| G-CSF | NCT01933932 | Assess Efficacy & Safety of Selumetinib in Combination With Docetaxel in Patients Receiving 2nd Line Treatment for v-Ki-ras2 Kirsten Rat Sarcoma Viral Oncogene                                   | Active, not recruiting | Locally Advanced or Metastatic Non Small Cell Lung Cancer Stage IIIb - IV                                                                                                                                                                                        | Drug: Selumetinib Drug: Docetaxel Drug: Placebo Drug: Pegylated G-CSF                                                                                                                                                                                                                                                         | Progression-Free Survival (PFS) Overall Survival (OS) Objective Response Rate (ORR) Duration of Response (DoR) Symptom Improvement Rate Using Average Symptom Burden Index (ASBI) of the Lung Cancer Symptom Scale (LCSS) Time to Symptom Progression Using Average Symptom Burden Index (ASBI) of the Lung Cancer Symptom Scale (LCSS)                                                                                                                                                                                                                                                                                                                                                                                                                                                                                                                                                                                                                                                                                                                                                                                                                                                                                                                                                                                                                                                                                                                                                                                                                                                                                                                                                                                                                                                                                                                                                                                                                                                                                                                                                                                                                                                                                                                                                                                                                                                                                                                                                                                                                                                                                                                                                                                                                                                                                                                        | Phase 3 | 510 | 25-Sep-13 | 18-Dec-19 |
| G-CSF | NCT00336024 | Combination Chemotherapy Followed By Peripheral Stem Cell Transplant in Treating Young Patients With Newly Diagnosed Supratentorial Primitive Neuroectodermal Tumors or High-Risk Medulloblastoma | Completed              | Untreated Childhood Medulloblastoma Untreated Childhood Supratentorial Primitive Neuroectodermal Tumor                                                                                                                                                           | Drug: etoposide Drug: cyclophosphamide Drug: cisplatin Biological: filgrastim Drug: carboplatin Drug: thiotepa Drug: methotrexate Drug: leucovorin calcium Drug: vincristine sulfate Procedure: autologous hematopoietic stem cell transplantation Other: laboratory biomarker analysis Procedure: quality-of-life assessment | Number of Patients Who Have Either a Complete Response (CR) Rate or No Complete Response Rate Percentage of Participants With Event Free Survival (EFS) Patterns of Failure Percentage of Participants With Any Acute Adverse Events. Number of Participants With Acute Hearing Loss and No Acute Hearing Loss Number of Participants With Chronic Primary Hypothyroidism/Subclinical Compensatory Hypothyroidism Number of Participants With Chronic Central Hypothyroidism Number of Participants With Chronic Low Somatomedin C Number of Participants With Chronic Diabetes Insipidus Number of Participants With Secondary Malignancies Number of Participants With Chronic/Late Hearing Loss and No Chronic/Late Hearing Loss Rates of Gastrointestinal Toxicities Rates of Nutritional Toxicities Median/Range of Patients for Total Quality of Life (QOL) Score, Intelligence Quotient (IQ) and Processing Speed Index (PSI). To Determine                                                                                                                                                                                                                                                                                                                                                                                                                                                                                                                                                                                                                                                                                                                                                                                                                                                                                                                                                                                                                                                                                                                                                                                                                                                                                                                                                                                                                                                                                                                                                                                                                                                                                                                                                                                                                                                                                                             | Phase 3 | 91  | 22-Oct-07 | 24-Oct-18 |

|       |             |                                                                                                                                                                                                                                                 |                        |                                                                                                                                       |                                                                                                                                                                                                                                                                                                                                                                                         |                                                                                                                                                                                                                                                                                                                                                                                                                                                                                                                                                                                                                                                                                |                 |     |           |           |
|-------|-------------|-------------------------------------------------------------------------------------------------------------------------------------------------------------------------------------------------------------------------------------------------|------------------------|---------------------------------------------------------------------------------------------------------------------------------------|-----------------------------------------------------------------------------------------------------------------------------------------------------------------------------------------------------------------------------------------------------------------------------------------------------------------------------------------------------------------------------------------|--------------------------------------------------------------------------------------------------------------------------------------------------------------------------------------------------------------------------------------------------------------------------------------------------------------------------------------------------------------------------------------------------------------------------------------------------------------------------------------------------------------------------------------------------------------------------------------------------------------------------------------------------------------------------------|-----------------|-----|-----------|-----------|
| G-CSF | NCT01045460 | Trial of Activated Marrow Infiltrating Lymphocytes Alone or in Conjunction With an Allogeneic Granulocyte Macrophage Colony-stimulating Factor (GM-CSF)-Based Myeloma Cellular Vaccine in the Autologous Transplant Setting in Multiple Myeloma | Active, not recruiting | Multiple Myeloma                                                                                                                      | Biological: Activated marrow infiltrating lymphocytes Biological: Allogeneic Myeloma Vaccine Drug: Cyclophosphamide Biological: Filgrastim Procedure: Leukapheresis Drug: Melphalan Biological: Autologous stem cell transplant                                                                                                                                                         | Response Rates by Blade Criteria Evaluate Progression-free Survival and Overall Survival Feasibility as Measured by Participant Withdrawal or Removal Safety as Measured by Grade 3-5 Adverse Events Anti-tumor Immune Response The Effect of aMILs on Osteoclastogenesis as Measured by Bone Turnover (RANKL/OPG Ratio) The Effect of aMILs on Osteoclastogenesis as Measured by Bone Turnover (Serum C Telopeptide Levels) The Effect of aMILs on Osteoclastogenesis as Measured by Bone Turnover (Alkaline Phosphatase Levels) The Effect of aMILs on Osteoclastogenesis as Measured by Bone Turnover (Osteocalcin Levels) Effect of aMILs on Clonogenic Myeloma Precursors | Phase 2         | 36  | 15-Jan-10 | 5-Feb-20  |
| G-CSF | NCT01516736 | Phase III Study Comparing the Efficacy and Safety of LA-EP2006 and Peg-Filgrastim                                                                                                                                                               | Completed              | Chemotherapy-induced Neutropenia Breast Cancer                                                                                        | Drug: LA-EP2006 Drug: Neulasta®                                                                                                                                                                                                                                                                                                                                                         | Mean Duration of Severe Neutropenia (DSN) During Cycle 1 of Chemotherapy Incidence of Febrile Neutropenia (FN) Number of Patients With at Least One Episode of Fever by Cycle and Across All Cycles Depth of ANC Nadir in Cycle 1 Number of Patients With ANC Nadir Per Day in Cycle 1 Time to ANC Recovery in Days in Cycle 1 Frequency of Infections by Cycle and Across All Cycles Mortality Due to Infection                                                                                                                                                                                                                                                               | Phase 3         | 308 | Mar-12    | 30-Aug-17 |
| G-CSF | NCT00096460 | Autologous or Donor Stem Cell Transplantation in Treating Patients With Recurrent Non-Hodgkin's Lymphoma (BMT CTN 0202)                                                                                                                         | Terminated             | Recurrent Grade 1 Follicular Lymphoma Recurrent Grade 2 Follicular Lymphoma Recurrent Grade 3 Follicular Lymphoma Follicular Lymphoma | Drug: Cyclophosphamide and Rituximab Drug: Filgrastim Radiation: Chemotherapy or Radiation therapy Drug: Non-myceloablative Conditioning regimen Procedure: Allogeneic transplant Procedure: Autologous transplant Drug: Rituximab maintenance                                                                                                                                          | Lymphoma Progression-free Survival                                                                                                                                                                                                                                                                                                                                                                                                                                                                                                                                                                                                                                             | Phase 2 Phase 3 | 30  | Aug-04    | 12-Sep-16 |
| G-CSF | NCT00669877 | Rituximab and Hyper-CVAD (Cyclophosphamide, Vincristine, Adriamycin, and Dexamethasone) for Burkitt's and Burkitt's -Like Leukemia/Lymphoma                                                                                                     | Completed              | Burkitt's Lymphoma Burkitt's-like Lymphoma                                                                                            | Drug: Rituximab Drug: Cyclophosphamide Drug: Doxorubicin Drug: Vincristine Drug: Dexamethasone Drug: G-CSF Drug: Cytarabine Drug: Methotrexate                                                                                                                                                                                                                                          | Complete Remission Rate: Percentage of Participants With Complete Remission (CR)                                                                                                                                                                                                                                                                                                                                                                                                                                                                                                                                                                                               | Phase 2         | 56  | Aug-02    | 16-May-18 |
| G-CSF | NCT00505921 | Autologous and Allogenic Transplantation With Campath-1H for T-Cell Lymphoma                                                                                                                                                                    | Terminated             | Lymphoma                                                                                                                              | Drug: Campath-1H Drug: G-CSF Drug: GM-CSF Drug: BCNU Drug: Stem Cell Transplant Drug: Preparative Regimen for Allogenic Stem Cell Transplantation Drug: Cytarabine Drug: Etoposide Drug: Melphalan Drug: Campath Drug: Fludarabine Drug: Cyclophosphamide Radiation: Low dose                                                                                                           | Participant Progression Free Survival at 2 Years                                                                                                                                                                                                                                                                                                                                                                                                                                                                                                                                                                                                                               | Phase 2         | 27  | Mar-03    | 16-Nov-11 |
| G-CSF | NCT00482053 | Phase 2 Poor Risk DLBCL of TLI and ATG Followed by Matched Allogeneic HT as Consolidation to Autologous HCT                                                                                                                                     | Terminated             | Lymphoma, B-cell Lymphoma, Non-Hodgkin Diffuse Large B-cell Lymphoma (DLBCL) Malignant Lymphoma, Non-Hodgkin                          | Procedure: Autologous hematopoietic stem cell transplantation (auto-HSCT) Procedure: Allogeneic hematopoietic stem cell transplantation (allo-HSCT) Procedure: Total lymphoid irradiation (TLI) Drug: Rituximab Drug: Carmustine Drug: Etoposide Drug: Filgrastim Drug: Anti-thymocyte globulin (ATG) Drug: Cyclosporine Drug: Mycophenolate mofetil (MMF) Drug: Cyclophosphamide Drug: | Event-free Survival (EFS) Per Protocol Median Time to Neutrophil Engraftment After Autologous Transplant Median Time to Platelet Engraftment After Autologous Transplant Median Time to Neutrophil Engraftment After Allogeneic Transplant Median Time to Platelet Engraftment After Allogeneic Transplant Incidence of Chronic Graft vs Host Disease (GvHD) Overall Survival (OS)                                                                                                                                                                                                                                                                                             | Phase 2         | 3   | Oct-06    | 14-May-18 |
| G-CSF | NCT00554788 | Combination Chemotherapy, Autologous Stem Cell Transplant, and/or Radiation Therapy in Treating Young Patients With Extraocular Retinoblastoma                                                                                                  | Active, not recruiting | Extraocular Retinoblastoma                                                                                                            | Procedure: Autologous Bone Marrow Transplantation Procedure: Autologous Hematopoietic Stem Cell Transplantation Drug: Carboplatin Drug: Cisplatin Drug: Cyclophosphamide Drug: Etoposide Biological: Filgrastim Procedure: In Vitro-Treated Peripheral Blood Stem Cell Transplantation Radiation: Radiation Therapy Drug: Thiotepal Drug: Vincristine                                   | Event-free Survival (EFS) Response Rate to the Induction Phase of the Regimen Percentage of Participants With Adverse Events as Assessed by the Common Terminology Criteria for Adverse Events (CTCAE) Version 4.0                                                                                                                                                                                                                                                                                                                                                                                                                                                             | Phase 3         | 60  | 4-Feb-08  | 19-Sep-19 |
| G-CSF | NCT00653068 | Combination Chemotherapy, Radiation Therapy, and an Autologous Peripheral Blood Stem Cell Transplant in Treating Young Patients With Atypical Teratoid/Rhabdoid Tumor of the Central Nervous System                                             | Active, not recruiting | Childhood Atypical Teratoid/Rhabdoid Tumor                                                                                            | Radiation: 3-Dimensional Conformal Radiation Therapy Procedure: Autologous Hematopoietic Stem Cell Transplantation Drug: Carboplatin Drug: Cisplatin Drug: Cyclophosphamide Drug: Etoposide Biological: Filgrastim Other: Laboratory Biomarker Analysis Drug: Leucovorin Calcium Drug:                                                                                                  | Event-free Survival Overall Survival (OS) Toxic Death Non-hematological Toxicity Associated With Chemotherapy: Grade 3 or Higher During Protocol Therapy                                                                                                                                                                                                                                                                                                                                                                                                                                                                                                                       | Phase 3         | 70  | 8-Dec-08  | 5-Feb-19  |

|       |             |                                                                                                                                                                   |                        |                                                                                                                                                                     |                                                                                                                                                                                                                                                                                                                                                                                                                                                                                     |                                                                                                                                                                                                                                                                                                                                                                                                                                                                                                                                                                                                                                                                                                                                                                                                                                                                                                                                                                                                                                                                                                                                                                                                                                                                                                                                                                                                                        |                 |     |            |           |
|-------|-------------|-------------------------------------------------------------------------------------------------------------------------------------------------------------------|------------------------|---------------------------------------------------------------------------------------------------------------------------------------------------------------------|-------------------------------------------------------------------------------------------------------------------------------------------------------------------------------------------------------------------------------------------------------------------------------------------------------------------------------------------------------------------------------------------------------------------------------------------------------------------------------------|------------------------------------------------------------------------------------------------------------------------------------------------------------------------------------------------------------------------------------------------------------------------------------------------------------------------------------------------------------------------------------------------------------------------------------------------------------------------------------------------------------------------------------------------------------------------------------------------------------------------------------------------------------------------------------------------------------------------------------------------------------------------------------------------------------------------------------------------------------------------------------------------------------------------------------------------------------------------------------------------------------------------------------------------------------------------------------------------------------------------------------------------------------------------------------------------------------------------------------------------------------------------------------------------------------------------------------------------------------------------------------------------------------------------|-----------------|-----|------------|-----------|
| G-CSF | NCT00567567 | Comparing Two Different Myeloablation Therapies in Treating Young Patients Who Are Undergoing a Stem Cell Transplant for High-Risk Neuroblastoma                  | Completed              | Localized Resectable Neuroblastoma Localized Unresectable Neuroblastoma Recurrent Neuroblastoma Regional Neuroblastoma Stage 4 Neuroblastoma Stage 4S Neuroblastoma | Procedure: Autologous Hematopoietic Stem Cell Transplantation Drug: Carboplatin Drug: Cisplatin Drug: Cyclophosphamide Drug: Doxorubicin Hydrochloride Drug: Etoposide Radiation: External Beam Radiation Therapy Biological: Filgrastim Drug: Isotretinoin Other: Laboratory Biomarker Analysis Drug: Melphalan Procedure: Peripheral Blood Stem Cell Transplantation Other: Pharmacological Study Drug: Thiopeta Drug: Topotecan Hydrochloride Drug: Vincristine Sulfate Liposome | Event-free Survival Rate Incidence Rate of Local Recurrence Response After Induction Therapy Duration of Greater Than or Equal to Grade 3 Neutropenia Duration of Greater Than or Equal to Grade 3 Thrombocytopenia EFS Pts Non-randomly Assigned to Single CEM (12-18 Mths, Stg. 4, MYCN Nonamplified Tumor/Unfavorable or Indeterminant Histopathology/Diploid DNA Content & Pts>547 Days, Stg.3, MYCN Nonamplified Tumor AND Unfavorable or Indeterminant Histopathology). Enumeration of Peripheral Blood Cluster of Differentiation (CD)3, CD4, and CD8 Cells Intraspinal Extension OS in Patients 12-18 Months, Stage 4, MYCN Nonamplified Tumor/Unfavorable Histopathology/Diploid DNA Content/Indeterminant Histology/Ploidy and Patients > 547 Days, Stage 3, MYCN Nonamplified Tumor AND Unfavorable Histopathology/Indeterminant Histology Peak Serum Concentration of Isotretinoin in Patients Enrolled on Either A3973, ANBL0032, ANBL0931, ANBL0532 and Future High Risk Studies Pharmacogenetic Variants in Patients Enrolled on Either A3973, ANBL0032, ANBL0931, ANBL0532 and Future High Risk Studies Presence and Function of T Cells Capable of Recognizing Neuroblastoma Proportion of Patients With Neuroblastoma Detected in Bone Marrow and Peripheral Blood Using RT-PCR Technique Response Rate Surgical Response Topotecan Systemic Clearance Type of Surgical or Radiotherapy Complication | Phase 3         | 630 | 5-Nov-07   | 1-May-19  |
| G-CSF | NCT00274924 | Rituximab and Combination Chemotherapy in Treating Patients With Stage II, Stage III, or Stage IV Diffuse Large B-Cell Non-Hodgkin's                              | Active, not recruiting | Lymphoma                                                                                                                                                            | Biological: filgrastim Biological: rituximab Drug: carboplatin Drug: cyclophosphamide Drug: doxorubicin hydrochloride Drug: etoposide Drug:                                                                                                                                                                                                                                                                                                                                         | 2-year Progression-Free Survival (PFS) 5-year Overall Survival                                                                                                                                                                                                                                                                                                                                                                                                                                                                                                                                                                                                                                                                                                                                                                                                                                                                                                                                                                                                                                                                                                                                                                                                                                                                                                                                                         | Phase 2         | 100 | April 2006 | 11-Jan-19 |
| G-CSF | NCT00899847 | Phase 2 Study of Autologous Followed by Nonmyeloablative Allogeneic Transplantation Using TLI & ATG                                                               | Completed              | Transplantation, Homologous Transplantation, Autologous Multiple Myeloma Blood and Marrow Transplant (BMT)                                                          | Procedure: Autologous peripheral blood stem cells (auto-PBSC) transplantation Procedure: Allogeneic peripheral blood stem cells (allo-PBSC) transplantation Drug: Filgrastim Drug: Cyclophosphamide Drug: Melphalan Drug: Cyclosporine Radiation: Total lymphoid irradiation Biological: Rabbit anti-thymocyte globulin Drug: Mycophenolate Mofetil 250mg Drug: Solumedrol Drug: Dihydrochloride Drug:                                                                              | Incidence of Graft Versus Host Disease (GvHD) Median Time to Engraftment After Auto-PBSC Transplant Median Time to Engraftment After Allo-PBSC Transplant Overall Response Rate (ORR) Complete Response Rate (CRR) Partial Response Rate (PRR) Event-free Survival (EFS) Overall Survival (OS)                                                                                                                                                                                                                                                                                                                                                                                                                                                                                                                                                                                                                                                                                                                                                                                                                                                                                                                                                                                                                                                                                                                         | Phase 2         | 9   | May-09     | 20-Oct-17 |
| G-CSF | NCT00085098 | Radiation Therapy Compared With Chemotherapy and Radiation Therapy in Treating Patients With Newly Diagnosed Primary Central Nervous System (CNS) Germ Cell Tumor | Completed              | Brain Tumor Central Nervous System Tumor                                                                                                                            | Biological: filgrastim Drug: carboplatin Drug: cisplatin Drug: cyclophosphamide Drug: etoposide Radiation: radiation therapy                                                                                                                                                                                                                                                                                                                                                        | Event-free Survival Number of Participants With a Response to Regimen B Toxicity and Safety as Assessed by the National Cancer Institute (NCI) Common Terminology Criteria for Adverse Events (CTCAE) Version 3.0 Quality of Life (QOL) and Neurocognitive Assessment (NP)                                                                                                                                                                                                                                                                                                                                                                                                                                                                                                                                                                                                                                                                                                                                                                                                                                                                                                                                                                                                                                                                                                                                             | Phase 3         | 24  | Jan-07     | 7-Sep-18  |
| G-CSF | NCT00379574 | Bortezomib Plus CHOP Every 2 Weeks for Advanced Stage DLBCL                                                                                                       | Completed              | Lymphoma, Large-Cell, Diffuse Lymphoma, B-Cell                                                                                                                      | Drug: Bortezomib Drug: Cyclophosphamide Drug: Doxorubicin Drug: Vincristine Drug:                                                                                                                                                                                                                                                                                                                                                                                                   | Number of Patients Who Achieved Complete Response Number of Patients Who Experienced Adverse Events                                                                                                                                                                                                                                                                                                                                                                                                                                                                                                                                                                                                                                                                                                                                                                                                                                                                                                                                                                                                                                                                                                                                                                                                                                                                                                                    | Phase 1 Phase 2 | 49  | Sep-06     | 15-Mar-13 |
| G-CSF | NCT00040937 | S0204 Thalidomide, Chemotherapy, and Peripheral Stem Cell Transplant in Treating Patients With Multiple Myeloma                                                   | Completed              | Multiple Myeloma                                                                                                                                                    | Biological: filgrastim Biological: sargramostim Drug: cyclophosphamide Drug: dexamethasone Drug: melphalan Drug: prednisone Drug: thalidomide Procedure:                                                                                                                                                                                                                                                                                                                            | Overall Survival Assess Toxicity of Thalidomide/Dexamethasone as a Pre-transplant Induction Regimen.                                                                                                                                                                                                                                                                                                                                                                                                                                                                                                                                                                                                                                                                                                                                                                                                                                                                                                                                                                                                                                                                                                                                                                                                                                                                                                                   | Phase 2         | 147 | Jun-02     | 8-Dec-16  |
| G-CSF | NCT00304070 | Cisplatin-Based Chemotherapy and/or Surgery in Treating Young Patients With Adrenocortical Tumor                                                                  | Completed              | Stage I Adrenocortical Carcinoma Stage II Adrenocortical Carcinoma Stage III Adrenocortical Carcinoma Stage IV Adrenocortical Carcinoma                             | Drug: doxorubicin hydrochloride Procedure: conventional surgery Drug: cisplatin Drug: mitotane Drug: etoposide Biological: filgrastim                                                                                                                                                                                                                                                                                                                                               | Five Year Event-free Survival (EFS) Toxicity Associated With Chemotherapy Using National Cancer Institute (NCI) Common Terminology Criteria for Adverse Events (CTCAE) Version 4.0 Complications Associated With Radical Adrenalectomy and RLND Frequency of Lymph Node Involvement by Imaging. Incidence and Type of Germline TP53 Mutations in Non-Brazilian Children and Children From Southern Brazil by Deoxyribonucleic Acid (DNA) Sequencing and Affymetrix Gene Chip Analysis. Molecular Alterations and Embryonal Markers in Children With ACT - A43 del33bp Mutation of (Beta)-Catenin. Frequency of Tumor Spillage at the Time of Tumor Resection                                                                                                                                                                                                                                                                                                                                                                                                                                                                                                                                                                                                                                                                                                                                                           | Phase 3         | 78  | Sep-06     | 12-Jun-17 |



|       |             |                                                                                                                                        |                        |                                                                                 |                                                                                                                                                                                                                                                                                                                                                  |                                                                                                                                                                                                                                                                                                                                                                                                                                                                                                                                                                                                                                                                                                                                                                                                                                                                                                                                                                                                                                                                                                                                                                                                                                                                                                                                                                                                                                                                                                                                                                                                                                                                                                                                                                                                                                                                                              |                 |     |            |             |
|-------|-------------|----------------------------------------------------------------------------------------------------------------------------------------|------------------------|---------------------------------------------------------------------------------|--------------------------------------------------------------------------------------------------------------------------------------------------------------------------------------------------------------------------------------------------------------------------------------------------------------------------------------------------|----------------------------------------------------------------------------------------------------------------------------------------------------------------------------------------------------------------------------------------------------------------------------------------------------------------------------------------------------------------------------------------------------------------------------------------------------------------------------------------------------------------------------------------------------------------------------------------------------------------------------------------------------------------------------------------------------------------------------------------------------------------------------------------------------------------------------------------------------------------------------------------------------------------------------------------------------------------------------------------------------------------------------------------------------------------------------------------------------------------------------------------------------------------------------------------------------------------------------------------------------------------------------------------------------------------------------------------------------------------------------------------------------------------------------------------------------------------------------------------------------------------------------------------------------------------------------------------------------------------------------------------------------------------------------------------------------------------------------------------------------------------------------------------------------------------------------------------------------------------------------------------------|-----------------|-----|------------|-------------|
| G-CSF | NCT00439556 | Bortezomib and Chemotherapy in Treating Participants With Lymphoid Malignancies Undergoing Stem Cell Transplant                        | Completed              | CD20 Positive Hematopoietic and Lymphoid Neoplasm Lymphocytic Neoplasm Lymphoma | Cell<br>Procedure: Allogeneic Hematopoietic Stem Cell Transplantation Biological: Anti-Thymocyte Globulin Drug: Bortezomib Drug: Carmustine Drug: Cytarabine Drug: Etoposide Biological: Filgrastim Drug: Melphalan Drug: Methotrexate Biological: Rituximab Drug: Tacrolimus                                                                    | Number of Participants With Dose Limiting Toxicity (DLT) Disease-free Survival                                                                                                                                                                                                                                                                                                                                                                                                                                                                                                                                                                                                                                                                                                                                                                                                                                                                                                                                                                                                                                                                                                                                                                                                                                                                                                                                                                                                                                                                                                                                                                                                                                                                                                                                                                                                               | Phase 2         | 40  | 13-Feb-07  | 10-Sep-19   |
| G-CSF | NCT00186888 | Study of Treatment for Patients With Cancer of the Eye -Retinoblastoma                                                                 | Active, not recruiting | Retinoblastoma Retinal Neoplasm                                                 | Procedure: Enucleation Drug: Vincristine, Carboplatin Procedure: Focal Therapies Radiation: External Beam Radiation Drug: Vincristine and Topotecan Drug: Vincristine + Carboplatin + Etoposide Drug: vincristine, cyclophosphamide, and doxorubicin Drug: Vincristine, Carboplatin and Etoposide Procedure: Periocular carboplatin Other: G-CSF | Stratum B Response to Window Therapy Stratum B Response Rate of Early Stage Eyes to Window Therapy Relationship Between Topotecan Clearance (CL) and CYP3A4/5 Genotype in Stratum B Participants. Relationship Between Topotecan Clearance (CL) and ABCG2/B1 Genotype in Stratum B Participants. Event-free Survival of Stratum B Patients Responding to Window Treatment Ocular Survival of Stratum B Patients Responding to Window Treatment Event-free Survival of Eyes in Stratum B Patients Responding to Window Treatment Ocular Survival of Eyes in Stratum B Patients Responding to Window Treatment Event-free Survival of Stratum B Patients Not Responding to Window Treatment Ocular Survival of Stratum B Patients Not Responding to Window Treatment Event-free Survival of Eyes in Stratum B Patients Not Responding to Window Treatment Ocular Survival of Eyes in Stratum B Patients Not Responding to Window Treatment Event-free Survival of Stratum A Patients Ocular Survival of Stratum A Patients Event-free Survival of Eyes of Stratum B Patients Ocular Survival of Eyes of Stratum B Patients Event-free Survival of Eyes in Stratum A and Stratum B Patients Based on IC Classification Ocular Survival of Eyes in Stratum A and Stratum B Patients Based on AJCC Classification Ocular Survival Per Eye in Stratum A and Stratum B Patients Based on AJCC Classification Change in Cognitive Functioning Change in Relevant Daily Living Skills Change in Parent Report of Social-Emotional Factors Change in Parenting Stress Index (PSI) Assessment of School Readiness Number of Participants With Development of Pineal Cysts Number of Participants With Change in Size of Pineal Gland Change in Distortion Product Otoacoustic Emissions (DPOAEs) Mean Primary Visual Cortex Function: Cluster Size Mean Primary Visual Cortex Function: Maximum T-value | Phase 3         | 107 | April 2005 | 7, 5-Feb-20 |
| G-CSF | NCT00027846 | Observation or Radiation Therapy and/or Chemotherapy and Second Surgery in Treating Children Who Have Undergone Surgery for Ependymoma | Completed              | Brain Tumor Central Nervous System Tumor                                        | Biological: filgrastim Drug: carboplatin Drug: cyclophosphamide Drug: etoposide Drug: vincristine sulfate Radiation: radiation therapy Drug: Mesna Procedure: therapeutic conventional surgery                                                                                                                                                   | Event-free Survival Overall Survival Rate of Gross-total or Near-total Resection and Second Surgery After Chemotherapy Event-free Survival (EFS) Local Control and Patterns of Failure                                                                                                                                                                                                                                                                                                                                                                                                                                                                                                                                                                                                                                                                                                                                                                                                                                                                                                                                                                                                                                                                                                                                                                                                                                                                                                                                                                                                                                                                                                                                                                                                                                                                                                       | Phase 2         | 378 | Aug-03     | 7-Aug-19    |
| G-CSF | NCT00133991 | Combination Chemotherapy and Rituximab in Treating Patients With Newly Diagnosed Burkitt's Lymphoma or Leukemia                        | Completed              | Leukemia Lymphoma                                                               | Biological: Filgrastim Biological: Rituximab Drug: Cyclophosphamide Drug: Cytarabine Drug: Methotrexate Drug: Prednisone Drug: Hydrocortisone Drug:                                                                                                                                                                                              | Overall Response Rate Overall Survival Event-free Survival Percentage of Participants Experiencing Grade 3-5 Toxicity Relapse Pattern                                                                                                                                                                                                                                                                                                                                                                                                                                                                                                                                                                                                                                                                                                                                                                                                                                                                                                                                                                                                                                                                                                                                                                                                                                                                                                                                                                                                                                                                                                                                                                                                                                                                                                                                                        | Phase 2         | 23  | Jul-05     | 17-Sep-18   |
| G-CSF | NCT01875237 | Donor Lymphocyte Infusion (DLI) of T-cells Genetically Modified With iCasp9 Suicide Gene                                               | Terminated             | Leukemia Myeloma Myeloproliferative Diseases                                    | Drug: Fludarabine Drug: Melphalan Drug: Alemtuzumab Procedure: Stem Cell infusion Drug: Tacrolimus Drug: Mini Methotrexate Drug: G-CSF Procedure: Donor Lymphocyte Infusion (DLI) Drug: AP1903 Drug: Methylprednisolone Behavioral: Questionnaire                                                                                                | To Evaluate the Safety of Donor Lymphocyte Infusion Followed by Dimerizer Drug, AP1903 by Number of Participants With Adverse Events, Number of Participants Assessed Post Donor Lymphocyte Infusion (DLI): Disease-free Survival & Non-relapse Mortality, Chimerism and GVHD, To Assess the Incidence of Epstein-Barr Virus -PTLD or EBV Reactivation Requiring Therapy Post DLI, To Assess the Proportion of Patients Developing Grade I-IV Acute GVHD To Assess the Proportions of GvHD Response Post-2 administration of AP1903, To Assess the Incidence of GvHD Treatment Failure Post-administration of AP1903, To Assess the Incidence of Acute GvHD Flare After CR/PR Requiring Additional Agent for Systemic Therapy Before Day 56 Post-administration of                                                                                                                                                                                                                                                                                                                                                                                                                                                                                                                                                                                                                                                                                                                                                                                                                                                                                                                                                                                                                                                                                                                           | Phase 1 Phase 3 | 3   | 27-Dec-13  | 16-Jul-19   |
| G-CSF | NCT00001832 | Lymphocyte Re-infusion During Immune Suppression to Treat Metastatic Melanoma                                                          | Completed              | Melanoma Neoplasm Metastasis                                                    | Drug: gp100:209-217 (210M) Drug: Montanide ISA-51 Drug: IL-2 Drug: MART-1:26-35(27L) Biological: Abl cells Drug: Fludarabine Drug: Cyclophosphamide Biological: GCSF (Growth colony stimulating                                                                                                                                                  | Clinical Response Number of Participants With Adverse Events                                                                                                                                                                                                                                                                                                                                                                                                                                                                                                                                                                                                                                                                                                                                                                                                                                                                                                                                                                                                                                                                                                                                                                                                                                                                                                                                                                                                                                                                                                                                                                                                                                                                                                                                                                                                                                 | Phase 2         | 170 | Aug-99     | 21-Dec-12   |

|       |             |                                                                                                                                                                             |            |                                                                                                                                                                                                                                                                                                                                                                                                                                                                                                                                                                  |                                                                                                                                                                                                                                                                                                                                        |                                                                                                                                                                                                                                                                                                                                                                         |                 |     |           |           |
|-------|-------------|-----------------------------------------------------------------------------------------------------------------------------------------------------------------------------|------------|------------------------------------------------------------------------------------------------------------------------------------------------------------------------------------------------------------------------------------------------------------------------------------------------------------------------------------------------------------------------------------------------------------------------------------------------------------------------------------------------------------------------------------------------------------------|----------------------------------------------------------------------------------------------------------------------------------------------------------------------------------------------------------------------------------------------------------------------------------------------------------------------------------------|-------------------------------------------------------------------------------------------------------------------------------------------------------------------------------------------------------------------------------------------------------------------------------------------------------------------------------------------------------------------------|-----------------|-----|-----------|-----------|
| G-CSF | NCT00098839 | Chemoimmunotherapy With Epratuzumab in Relapsed Acute Lymphoblastic Leukemia (ALL)                                                                                          | Completed  | Recurrent Childhood Acute Lymphoblastic Leukemia                                                                                                                                                                                                                                                                                                                                                                                                                                                                                                                 | Drug: L-asparaginase Drug: doxorubicin hydrochloride Drug: therapeutic hydrocortisone Drug: vincristine sulfate Biological: epratuzumab Drug: cytarabine Drug: prednisone Drug: pegaspargase Drug: dexrazoxane hydrochloride Drug: methotrexate Drug: etoposide Drug: cyclophosphamide Drug: leucovorin calcium Biological: filgrastim | Remission Re-induction (CR2) Rate Event-free Survival Rate Rate of Minimal Residual Disease (MRD) < 0.01% Pharmacokinetics                                                                                                                                                                                                                                              | Phase 1 Phase 2 | 134 | Feb-05    | 12-Dec-17 |
| G-CSF | NCT01010217 | Mismatched Transplantation Using High-dose Post-transplant Cyclophosphamide                                                                                                 | Completed  | Blood Stem Cell Transplant Failure Leukemia Hematologic Malignancies                                                                                                                                                                                                                                                                                                                                                                                                                                                                                             | Drug: Cyclophosphamide Drug: Fludarabine Drug: Melphalan Drug: Mesna Drug: Rituximab Procedure: Stem Cell Transplantation Drug: Thiotepa Drug: Tacrolimus Drug: Mycophenolate mofetil Drug: G-CSF                                                                                                                                      | Number of Participants With Non-relapse Mortality (NRM) Number of Participants With Non Related Mortality (NRM) Engraftments Grade III-IV aGVHD cGVHD Disease Free Survival                                                                                                                                                                                             | Phase 2         | 176 | 5-Nov-09  | 7-Jan-20  |
| G-CSF | NCT00006184 | Chemotherapy, Stem Cell Transplantation and Donor and Patient Vaccination for Treatment of Multiple Myeloma                                                                 | Completed  | Multiple Myeloma                                                                                                                                                                                                                                                                                                                                                                                                                                                                                                                                                 | Drug: Myeloma Immunoglobulin Idiotype Vaccine Drug: Bortezomib Drug: Cyclophosphamide Drug: Cyclosporine Drug: Doxorubicin hydrochloride Drug: Etoposide Drug: Fludarabine phosphate Drug: Prednisone Drug: Vincristine Sulfate Drug: Methotrexate Biological: GM-CSF (granulocyte macrophage colony                                   | Immune Response Number of Participants With Adverse Events                                                                                                                                                                                                                                                                                                              | Phase 2         | 20  | 8-Feb-01  | 20-Oct-17 |
| G-CSF | NCT00064337 | S0115, High-Dose Melphalan and Autologous Peripheral Stem Cell Transplantation in Treating Patients With Multiple Myeloma or Primary Systemic Amyloidosis                   | Completed  | Multiple Myeloma Plasma Cell Myeloma                                                                                                                                                                                                                                                                                                                                                                                                                                                                                                                             | Biological: filgrastim Drug: cyclophosphamide Drug: dexamethasone Drug: melphalan Drug: thalidomide Procedure: peripheral blood stem cell transplantation                                                                                                                                                                              | Overall Survival Hematologic Response                                                                                                                                                                                                                                                                                                                                   | Phase 2         | 104 | Jan-04    | 9-Aug-18  |
| G-CSF | NCT01746173 | CHOEP + High Dose Therapy + Auto SCT for T-Cell Lymphoma                                                                                                                    | Terminated | T-cell Non-Hodgkin Lymphoma                                                                                                                                                                                                                                                                                                                                                                                                                                                                                                                                      | Drug: Cyclophosphamide Drug: Doxorubicin Drug: Vincristine Drug: Etoposide Drug: Prednisone Drug: Filgrastim Drug: Plerixafor Procedure: Stem Cell Collection Drug: Palifermin Drug: Gemcitabine Drug: Busulfan Drug: Melphalan Procedure: Stem Cell Transplant                                                                        | 24-month Progression-Free Survival Rate Induction Response                                                                                                                                                                                                                                                                                                              | Phase 2         | 5   | Feb-13    | 24-Feb-17 |
| G-CSF | NCT00404066 | Phase 2 Neoadjuvant Doxorubicin and Cyclophosphamide -> Docetaxel With Lapatinib in Stage II/III Her2Neu+ Breast Cancer                                                     | Completed  | Breast Cancer Metastatic Breast Cancer                                                                                                                                                                                                                                                                                                                                                                                                                                                                                                                           | Drug: Lapatinib Drug: Doxorubicin Drug: Cyclophosphamide Drug: Docetaxel Drug: Pegfilgrastim Drug: Filgrastim Drug: Dexamethasone Drug: Trastuzumab                                                                                                                                                                                    | Percentage of Participants With Pathologic Complete Response (pCR) Disease-free Survival (DFS)                                                                                                                                                                                                                                                                          | Phase 2         | 21  | Oct-06    | 22-Dec-17 |
| G-CSF | NCT00002601 | Combination Chemotherapy and Peripheral Stem Cell Transplantation in Treating Patients With Sarcoma                                                                         | Completed  | Sarcoma                                                                                                                                                                                                                                                                                                                                                                                                                                                                                                                                                          | Biological: filgrastim Drug: cisplatin Drug: doxorubicin hydrochloride Drug: ifosfamide Drug: melphalan Procedure: peripheral blood stem cell transplantation                                                                                                                                                                          | Number of Participants With Grade 3 Bilirubin Toxicities Counts 5-year Progression-free Survival 5-year Overall Survival                                                                                                                                                                                                                                                | Phase 2         | 13  | Sep-94    | 3-Mar-17  |
| G-CSF | NCT00423852 | Paclitaxel, Ifosfamide, and Carboplatin Followed By Autologous Stem Cell Transplant in Treating Patients With Germ Cell Tumors That Did Not Respond to Cisplatin            | Completed  | Brain and Central Nervous System Tumors Extragenital Germ Cell Tumor Ovarian Cancer Teratoma Testicular Germ Cell Tumor                                                                                                                                                                                                                                                                                                                                                                                                                                          | Biological: filgrastim Drug: carboplatin Drug: ifosfamide Drug: paclitaxel Procedure: autologous hematopoietic stem cell transplantation Procedure: peripheral blood stem cell transplantation                                                                                                                                         | Response Maximum Tolerated Dose of Ifosfamide                                                                                                                                                                                                                                                                                                                           | Phase 1 Phase 2 | 26  | Aug-06    | 18-May-16 |
| G-CSF | NCT01707004 | Decitabine and Total-Body Irradiation Followed By Donor Bone Marrow Transplant and Cyclophosphamide in Treating Patients With Relapsed or Refractory Acute Myeloid Leukemia | Completed  | Acute Myeloid Leukemia With Multilineage Dysplasia Following Myelodysplastic Syndrome Adult Acute Myeloid Leukemia in Remission Adult Acute Myeloid Leukemia With 11q23 (MLL) Abnormalities Adult Acute Myeloid Leukemia With Del(5q) Adult Acute Myeloid Leukemia With Inv(16)(p13;q22) Adult Acute Myeloid Leukemia With t(15;17)(q22;q12) Adult Acute Myeloid Leukemia With t(16;16)(p13;q22) Adult Acute Myeloid Leukemia With t(8;21)(q22;q22) de Novo Myelodysplastic Syndromes Previously Treated Myelodysplastic Syndromes Recurrent Adult Acute Myeloid | Drug: decitabine Drug: fludarabine phosphate Drug: busulfan Drug: cyclophosphamide Drug: tacrolimus Drug: mycophenolate mofetil Biological: filgrastim Radiation: total-body irradiation Procedure: allogeneic bone marrow transplantation Other: laboratory biomarker analysis                                                        | Overall Survival (OS) Time to Neutrophil Recovery Percentage of Participants With Platelet Recovery by Day 30 Number of Participants With Primary Graft Failure Cumulative Incidence of Grade III-IV Acute GVHD Cumulative Incidence of Chronic GVHD According to BMTCTN Number of Participants With Complete Remission After Transplantation Progression Free Survival | Phase 2         | 20  | 16-May-13 | 21-Nov-19 |

|       |             |                                                                                                                                                                                                                                                      |                        |                                                                                                                                                                      |                                                                                                                                                                                                                                                                                                                              |                                                                                                                                                                                                                                                                                                                                                                                                                                                                                                                                                                                                                                                                                                                                                                                                                                                                                                                                                                                                                                                                                                                                                                                                                                                                                                                                               |         |     |           |                |
|-------|-------------|------------------------------------------------------------------------------------------------------------------------------------------------------------------------------------------------------------------------------------------------------|------------------------|----------------------------------------------------------------------------------------------------------------------------------------------------------------------|------------------------------------------------------------------------------------------------------------------------------------------------------------------------------------------------------------------------------------------------------------------------------------------------------------------------------|-----------------------------------------------------------------------------------------------------------------------------------------------------------------------------------------------------------------------------------------------------------------------------------------------------------------------------------------------------------------------------------------------------------------------------------------------------------------------------------------------------------------------------------------------------------------------------------------------------------------------------------------------------------------------------------------------------------------------------------------------------------------------------------------------------------------------------------------------------------------------------------------------------------------------------------------------------------------------------------------------------------------------------------------------------------------------------------------------------------------------------------------------------------------------------------------------------------------------------------------------------------------------------------------------------------------------------------------------|---------|-----|-----------|----------------|
| G-CSF | NCT00499616 | Combination Chemotherapy and Surgery With or Without Isotretinoin in Treating Young Patients With Neuroblastoma                                                                                                                                      | Active, not recruiting | Neuroblastoma                                                                                                                                                        | Drug: carboplatin Drug: cyclophosphamide Drug: doxorubicin hydrochloride Drug: etoposide Drug: topotecan hydrochloride Drug: Isotretinoin Procedure: Surgery Drug: Filgrastim                                                                                                                                                | Overall Survival (OS) Rates Definitive Determination of the Prognostic Ability of 1p and 11q Comparison Between Reduce Intensity of Therapy for Patients With Stage 4 Neuroblastoma and Favorable Biological Features and Patients < 1 Year of Age With Stage 4 Neuroblastoma Treated on COG-A3961 Comparison Between Reduce Intensity of Therapy for Patients With Unfavorable Histology Neuroblastoma and Patients Unfavorable Histology Neuroblastoma Treated on COG-A3961 Reduced Surgical Morbidity for Patients With Stage 4S Neuroblastoma Outcome of Patients With Stage 4S Neuroblastoma Who Are Unable to Undergo Biopsy for Biology-based Risk Assignment Correlation Between Extent of Surgical Resection With the Maintenance of Local Control, Event Free Survival (EFS) Correlation Between Extent of Surgical Resection With the Maintenance of Local Control, Overall Survival (OS) Rates Correlation Between Extent of Surgical Resection With the Maintenance of Local Control, Surgical Complication Rate Second-event-free Survival (E2FS) Second-Overall Survival Biological Surrogate Markers Neurologic Symptoms Association Between Surgical Biopsy Technique With Adequacy of Tissue Acquisition for Biologic Studies, and With Complications Associated With the Biopsy Procedure Image Defined Risk Factor (IDRF) | Phase 3 | 464 | Oct-07    | 22-Oct-19      |
| G-CSF | NCT00089544 | Preoperative Thalidomide With Radiation Therapy For Patients With Low-Grade Primary Soft Tissue Sarcoma or Thalidomide With Radiation Therapy and Chemotherapy For Patients With High-Grade or Intermediate-Grade Primary Soft Tissue Sarcoma of the | Terminated             | Recurrent Adult Soft Tissue Sarcoma Stage I Adult Soft Tissue Sarcoma AJCC v7 Stage II Adult Soft Tissue Sarcoma AJCC v7 Stage III Adult Soft Tissue Sarcoma AJCC v7 | Drug: Dacarbazine Drug: Doxorubicin Hydrochloride Biological: Filgrastim Drug: Ifosfamide Other: Laboratory Biomarker Analysis Radiation: Radiation Therapy Drug: Thalidomide Procedure: Therapeutic Conventional Surgery                                                                                                    | Treatment Delivery With Compliance Defined as Receiving at Least 95% of the Pre-operative Protocol Dose of RT, All 3 Cycles of MAID (if Applicable), and Receive Thalidomide on 75% of the Days During Radiation Wound Complication (Grades 2, 3, 4, and 5) as Measured by CTCAE v3.0 Response to Pre-operative Therapy Assessed Using RECIST Criteria                                                                                                                                                                                                                                                                                                                                                                                                                                                                                                                                                                                                                                                                                                                                                                                                                                                                                                                                                                                        | Phase 2 | 23  | 17-Jun-04 | April 13, 2018 |
| G-CSF | NCT00074165 | Treating Patients With Recurrent PCNSL With Carboplatin/BBBD and Adding Rituxan To The Treatment Regimen                                                                                                                                             | Terminated             | Brain and Central Nervous System Tumors Drug/Agent Toxicity by Tissue/Organ Lymphoma Thrombocytopenia                                                                | Drug: Rituxan Drug: Cyclophosphamide Drug: Etoposide Drug: Carboplatin Drug: Sodium thiosulfate Drug: Neupogen Drug: Cytarabine                                                                                                                                                                                              | Number of Participants With a Complete Response Rate to Chemotherapy Regimen Assessed by Radiographic Response at 2 Years. Number of Participants With Overall Survival Assessed by Clinical and Radiographic Response Progression-free Survival Assessed by Clinical and Radiographic Response From First Day of Treatment Until Tumor Progression Quality of Life Assessed by EORTC QOL Before Treatment and Then Every 3 Months Otolotoxicity Assessed by Audiology Hearing Test Done Monthly During Treatment Effect of Sodium Thiosulfate (STS) on Granulocytes and Erythrocytes                                                                                                                                                                                                                                                                                                                                                                                                                                                                                                                                                                                                                                                                                                                                                         | Phase 2 | 17  | Jan-03    | April 21, 2017 |
| G-CSF | NCT01026220 | Combination Chemotherapy and Radiation Therapy in Treating Young Patients With Newly Diagnosed Hodgkin Lymphoma                                                                                                                                      | Completed              | Childhood Nodular Lymphocyte Predominant Hodgkin Lymphoma Stage III Childhood Hodgkin Lymphoma Stage IV Childhood Hodgkin Lymphoma                                   | Biological: bleomycin sulfate Drug: doxorubicin hydrochloride Drug: liposomal vincristine sulfate Drug: vinorelbine tartrate Drug: cyclophosphamide Drug: etoposide phosphate Drug: prednisone Biological: filgrastim Drug:                                                                                                  | Second-event-free Survival Safety Analysis and Monitoring of Toxic Death Event Free Survival Event-free Survival for Rapid Early Response (RER) Positron Emission Tomography (PET)-1 Positive, RER PET-1 Negative Relapse-free Survival Grade 3 and 4 Non-hematologic Toxicities During Protocol Therapy Overall Survival                                                                                                                                                                                                                                                                                                                                                                                                                                                                                                                                                                                                                                                                                                                                                                                                                                                                                                                                                                                                                     | Phase 3 | 166 | Dec-09    | 30-May-17      |
| G-CSF | NCT00742924 | Zoledronic Acid and Combination Chemotherapy in Treating Patients With Newly Diagnosed Metastatic Osteosarcoma                                                                                                                                       | Completed              | Sarcoma                                                                                                                                                              | Drug: cisplatin Drug: dexrazoxane hydrochloride Drug: doxorubicin hydrochloride Drug: etoposide Drug: ifosfamide Drug: leucovorin calcium Drug: methotrexate Drug: zoledronic acid Procedure: adjuvant therapy Procedure: neoadjuvant therapy Procedure: therapeutic conventional surgery Biological: filgrastim Drug: Mesna | Limiting Toxicity Histologic Response as Assessed in the Primary Tumor and in Resected Metastases Event-free Survival Secondary Limiting Toxicity Prognostic Value of Bone Resorption Markers                                                                                                                                                                                                                                                                                                                                                                                                                                                                                                                                                                                                                                                                                                                                                                                                                                                                                                                                                                                                                                                                                                                                                 | Phase 1 | 24  | Aug-08    | 4-Jul-14       |
| G-CSF | NCT00006237 | S0008: Chemotherapy Plus Biological Therapy in Treating Patients With Melanoma                                                                                                                                                                       | Completed              | Melanoma (Skin)                                                                                                                                                      | Biological: interleukin-2 Biological: filgrastim Biological: interferon alfa Drug: cisplatin Drug: dacarbazine Drug:                                                                                                                                                                                                         | 5-year Overall Survival 5-year Relapse-Free Survival Toxicity                                                                                                                                                                                                                                                                                                                                                                                                                                                                                                                                                                                                                                                                                                                                                                                                                                                                                                                                                                                                                                                                                                                                                                                                                                                                                 | Phase 3 | 432 | Aug-00    | 25-Mar-15      |
| G-CSF | NCT00392834 | Rituximab and Combination Chemotherapy in Treating Patients With Newly Diagnosed, HIV-Associated Burkitt's Lymphoma                                                                                                                                  | Completed              | Lymphoma                                                                                                                                                             | Biological: filgrastim Biological: pegfilgrastim Biological: rituximab Drug: cyclophosphamide Drug: cytarabine Drug: doxorubicin hydrochloride Drug: etoposide Drug: ifosfamide Drug: leucovorin calcium Drug: liposomal cytarabine Drug: methotrexate Drug: therapeutic hydrocortisone Drug: vincristine sulfate            | Overall Survival (OS) at 1 Year Complete Response Rate Failure-free Survival (FFS) Event-free Survival (EFS) Toxicity Incidence of Infection-related Deaths Correlation of C-flip Expression, p53 Mutations, and Multidrug Resistance Expression With OS, FFS, and EFS Utility of Flow Cytometry in Detecting Leptomeningeal Disease Degree of Discordance Between Flow Cytometry and CNS Cytology Results Biologic and Prognostic Significance of Epstein-Barr Virus (EBV) at Diagnosis and Correlation With OS, FFS, and EFS Correlation of EBV Load Measurements With OS, FFS, and EFS                                                                                                                                                                                                                                                                                                                                                                                                                                                                                                                                                                                                                                                                                                                                                     | Phase 2 | 34  | Sep-06    | 6-Jun-18       |

|       |             |                                                                                                                                                    |            |                                     |                                                                                                                                                                                                                                                                                      |                                                                                                                                                                                                                                                                                                                                                                                                                                                                                                                                                                                                                                                                                                                                                                                                                                                                                                                                                                                                                                                                                                                                                                    |                 |     |          |           |
|-------|-------------|----------------------------------------------------------------------------------------------------------------------------------------------------|------------|-------------------------------------|--------------------------------------------------------------------------------------------------------------------------------------------------------------------------------------------------------------------------------------------------------------------------------------|--------------------------------------------------------------------------------------------------------------------------------------------------------------------------------------------------------------------------------------------------------------------------------------------------------------------------------------------------------------------------------------------------------------------------------------------------------------------------------------------------------------------------------------------------------------------------------------------------------------------------------------------------------------------------------------------------------------------------------------------------------------------------------------------------------------------------------------------------------------------------------------------------------------------------------------------------------------------------------------------------------------------------------------------------------------------------------------------------------------------------------------------------------------------|-----------------|-----|----------|-----------|
| G-CSF | NCT0004092  | Combination Chemotherapy in Treating Patients With High-Risk Breast Cancer                                                                         | Completed  | Breast Cancer                       | Biological: filgrastim Drug: carboplatin Drug: cyclophosphamide Drug: doxorubicin hydrochloride Drug: paclitaxel Drug: thiopeta Procedure: peripheral blood stem cell transplantation                                                                                                | Five-Year Relapse-free Survival Five-Year Overall Survival                                                                                                                                                                                                                                                                                                                                                                                                                                                                                                                                                                                                                                                                                                                                                                                                                                                                                                                                                                                                                                                                                                         | Phase 2         | 72  | May-99   | 4-Aug-15  |
| G-CSF | NCT00096135 | Combination Chemotherapy and Radiation Therapy in Treating Patients With Acute Lymphoblastic Leukemia That Has Relapsed in the CNS or Testes       | Completed  | Leukemia                            | Biological: filgrastim Drug: cyclophosphamide Drug: cytarabine Drug: daunorubicin hydrochloride Drug: dexamethasone Drug: etoposide Drug: leucovorin calcium Drug: mercaptopurine Drug: methotrexate Drug: pegaspargase Drug: therapeutic hydrocortisone Drug: vincristine           | Event-free Survival                                                                                                                                                                                                                                                                                                                                                                                                                                                                                                                                                                                                                                                                                                                                                                                                                                                                                                                                                                                                                                                                                                                                                | Not Applicable  | 168 | Nov-04   | 21-Mar-17 |
| G-CSF | NCT00968253 | RAD001 Study in Treatment of Relapsed or Refractory Acute Lymphocytic Leukemia                                                                     | Completed  | Leukemia Acute Lymphocytic Leukemia | Drug: Everolimus (RAD001) Drug: Cyclophosphamide Drug: Vincristine Drug: Doxorubicin Drug: Dexamethasone Drug: Mesna Drug: Methotrexate Drug: Ara-C (Cytarabine) Drug: Methylprednisone Drug: G-CSF                                                                                  | Maximum Tolerated Dose [MTD] Determination by Number of Participants With Dose Limiting Toxicity (DLT) Overall Response Rate (OR) Where OR = CR + CRp + CRr Participant Responses by Daily Dose Level Assignment (RAD001 5 mg, 10 mg and MTD 5 mg)                                                                                                                                                                                                                                                                                                                                                                                                                                                                                                                                                                                                                                                                                                                                                                                                                                                                                                                 | Phase 1 Phase 2 | 24  | Nov-09   | 27-Feb-19 |
| G-CSF | NCT00003659 | Fludarabine, Cyclophosphamide, and Rituximab in Treating Patients Who Have Chronic Lymphocytic Leukemia                                            | Completed  | Leukemia                            | Biological: filgrastim Biological: rituximab Drug: cyclophosphamide Drug: fludarabine phosphate                                                                                                                                                                                      | Overall Response Rate Utilize Flow Cytometry and Polymerase Chain Reaction as Sensitive Measures of Minimal Residual Disease Overall Survival Status                                                                                                                                                                                                                                                                                                                                                                                                                                                                                                                                                                                                                                                                                                                                                                                                                                                                                                                                                                                                               | Phase 2         | 39  | Sep-98   | 24-Oct-17 |
| G-CSF | NCT00304083 | Combination Chemotherapy in Treating Patients With Stage III or Stage IV Malignant Peripheral Nerve Sheath Tumors                                  | Completed  | Neurofibromatosis Type 1 Sarcoma    | Biological: filgrastim Drug: doxorubicin hydrochloride Drug: etoposide Drug: ifosfamide Procedure: conventional surgery Radiation: radiation therapy                                                                                                                                 | Number of Participants With Response Rate (Complete Response and Partial Response) Response of Plexiform Neurofibroma to Neoadjuvant Chemotherapy Using Volumetric MRI Analysis Utility of Fludeoxyglucose F18 Positron Emission Tomography (18FDG-PET) and Automated MRI Volumetric Tumor Analysis to Assess Response to Treatment Response Evaluation Using WHO, RECIST, 18 FDG-PET and Volumetric MRI With Percent Necrosis in Tumor Specimens Perform Pathologic Analysis of Tumor Samples to Analyze the Number of Participants With Markers as Predictors of Response Construct Tissue Microarray to Identify Novel Targets for Treatment for the Number of Participants With Available Tissue Identify the Number of Participants With a Serum Biomarker to Predict the Presence of MPNST Versus Benign Plexiform                                                                                                                                                                                                                                                                                                                                           | Phase 2         | 48  | Dec-05   | 18-Sep-18 |
| G-CSF | NCT00003631 | Chemotherapy Plus Radiation Therapy in Treating Patients With Refractory or Relapsed Hodgkin's Lymphoma                                            | Completed  | Lymphoma                            | Biological: filgrastim Drug: carboplatin Drug: carmustine Drug: cyclophosphamide Drug: cytarabine Drug: etoposide Drug: ifosfamide Drug: melphalan Procedure: bone marrow ablation with stem cell support Procedure: peripheral blood stem cell transplantation Radiation: radiation | Objective Response                                                                                                                                                                                                                                                                                                                                                                                                                                                                                                                                                                                                                                                                                                                                                                                                                                                                                                                                                                                                                                                                                                                                                 | Phase 2         | 118 | Aug-98   | 25-Jan-16 |
| G-CSF | NCT01564784 | A Study Of Inotuzumab Ozogamicin Versus Investigator's Choice Of Chemotherapy In Patients With Relapsed Or Refractory Acute Lymphoblastic Leukemia | Completed  | Acute Lymphoblastic Leukemia        | Drug: inotuzumab ozogamicin Drug: FLAG (fludarabine, cytarabine and G-CSF) Drug: HIDAC (high dose cytarabine) Drug: cytarabine and mitoxantrone                                                                                                                                      | Percentage of Participants With Hematologic Remission (Complete Remission [CR] Complete Remission With Incomplete Hematologic Recovery [CRI]) as Assessed by the Endpoint Adjudication Committee (EAC) Overall Survival (OS) Duration of Remission (DoR) for Participants Who Achieved CR/CRI (Per Investigator Assessment) Progression-Free Survival (PFS) Percentage of Participants Who Had a Hematopoietic Stem-Cell Transplant (HSCT) Percentage of Participants Achieving MRD Negativity (Based on Central Laboratory Analysis) in Participants Achieving a CR/CRI (Per EAC Assessment) Cytogenetic Status (Based on Local Laboratory Analysis) of Participants With CR/CRI (Per EAC Assessment) Maximum Observed Inotuzumab Ozogamicin Serum Concentration (Cmax) and Pre-Dose Inotuzumab Ozogamicin Serum Concentration (Ctough) Following Single and Multiple Dosing Change From Baseline in European Organization for Research and Treatment of Cancer Quality of Life Questionnaire, Core 30 (EORTC QLQ-C30) Score Change From Baseline in EuroQol 5 Dimension Health Questionnaire (EQ-5D) Index Score Change From Baseline in EQ-5D VAS Percentage of | Phase 3         | 326 | 2-Aug-12 | 9-Jan-19  |
| G-CSF | NCT00072280 | Surgery and/or Chemotherapy in Treating Children With Infantile, Congenital, or Childhood Fibrosarcoma                                             | Terminated | Sarcoma                             | Biological: dactinomycin Drug: cyclophosphamide Drug: etoposide Drug: ifosfamide Drug: vincristine sulfate Procedure: Conventional Surgery Biological: MESNA                                                                                                                         | Failure-free Survival (FFS) in "Chemotherapy Plus Possible Surgery" Arm                                                                                                                                                                                                                                                                                                                                                                                                                                                                                                                                                                                                                                                                                                                                                                                                                                                                                                                                                                                                                                                                                            | Phase 2         | 7   | Nov-04   | 30-Sep-14 |
| G-CSF | NCT00354744 | High-Dose Combination Chemotherapy and Radiation Therapy in Treating Patients With Newly Diagnosed Metastatic Rhabdomyosarcoma or Ectomesenchymoma | Completed  | Sarcoma                             | Biological: dactinomycin Drug: cyclophosphamide Drug: doxorubicin hydrochloride Drug: etoposide Drug: ifosfamide Drug: irinotecan hydrochloride Drug: vincristine sulfate Procedure: conventional surgery Radiation: radiation                                                       | Number of Patients With Complete or Partial Response Assessed by RECIST Criteria Percentage of Patients Experiencing Adverse Events Due to Concurrent Therapy Percentage of Patients Event Free at 4 Years Following Study Entry                                                                                                                                                                                                                                                                                                                                                                                                                                                                                                                                                                                                                                                                                                                                                                                                                                                                                                                                   | Phase 3         | 109 | Jul-06   | 29-Jan-20 |

|       |             |                                                                                                                                                                       |            |                                                                                |                                                                                                                                                                                                                                                                                                                                          |                                                                                                                                                                                                                                                                                                                                                                                                                                                                                                                                                                                                                                                                                                                                                                                                                                                                                                                                                                                                                                       |                 |     |            |           |
|-------|-------------|-----------------------------------------------------------------------------------------------------------------------------------------------------------------------|------------|--------------------------------------------------------------------------------|------------------------------------------------------------------------------------------------------------------------------------------------------------------------------------------------------------------------------------------------------------------------------------------------------------------------------------------|---------------------------------------------------------------------------------------------------------------------------------------------------------------------------------------------------------------------------------------------------------------------------------------------------------------------------------------------------------------------------------------------------------------------------------------------------------------------------------------------------------------------------------------------------------------------------------------------------------------------------------------------------------------------------------------------------------------------------------------------------------------------------------------------------------------------------------------------------------------------------------------------------------------------------------------------------------------------------------------------------------------------------------------|-----------------|-----|------------|-----------|
| G-CSF | NCT00113399 | Combination Chemotherapy With or Without Radiation Therapy in Treating Patients With Recurrent Head and Neck Cancer That Cannot Be Removed By Surgery                 | Terminated | Head and Neck Cancer                                                           | Biological: filgrastim Drug: cisplatin Drug: docetaxel Drug: fluorouracil Drug: paclitaxel Radiation: radiation therapy                                                                                                                                                                                                                  | Overall Survival                                                                                                                                                                                                                                                                                                                                                                                                                                                                                                                                                                                                                                                                                                                                                                                                                                                                                                                                                                                                                      | Phase 3         | 15  | April 2005 | 2-Jul-13  |
| G-CSF | NCT00054665 | PS-341 Alone and PS-341 Plus EPOCH Chemotherapy to Treat Non-Hodgkin's Lymphoma                                                                                       | Completed  | B-Cell Lymphoma                                                                | Drug: PS-341 Drug: Etoposide Drug: Doxorubicin Drug: Vincristine Drug: Cyclophosphamide Drug: Prednisone Drug: Filgrastim                                                                                                                                                                                                                | Clinical Response Rate Number of Participants With Adverse Events                                                                                                                                                                                                                                                                                                                                                                                                                                                                                                                                                                                                                                                                                                                                                                                                                                                                                                                                                                     | Phase 2         | 50  | Feb-03     | 11-Sep-12 |
| G-CSF | NCT00148317 | Phase II Study of Velcade, Decadron, and Doxil Followed by Cyclophosphamide in Multiple                                                                               | Completed  | Multiple Myeloma                                                               | Drug: Bortezomib Drug: dexamethasone Drug: liposomal doxorubicin Drug: cyclophosphamide Drug: Filgrastim                                                                                                                                                                                                                                 | Efficacy of Drug Combination as Therapy for Myeloma (Overall Response Rate) Yield of CD34+ Stem Cells Progression Free Survival                                                                                                                                                                                                                                                                                                                                                                                                                                                                                                                                                                                                                                                                                                                                                                                                                                                                                                       | Phase 2         | 38  | Jun-05     | 18-Jul-17 |
| G-CSF | NCT01827163 | Paclitaxel With Trastuzumab and Lapatinib in HER2-Positive Early Stage Breast Cancer                                                                                  | Completed  | HER2-Positive Early Stage Breast Cancer                                        | Drug: Paclitaxel Drug: Trastuzumab Drug: Lapatinib Drug: Pegfilgrastim                                                                                                                                                                                                                                                                   | Number of Participants Who Are Able to Complete THL (Paclitaxel, Trastuzumab, and Lapatinib) Without a Dose Delay or Reduction, Grade 3 or Greater QTC Prolongation Participants Toxicity Evaluated While on Study Treatment                                                                                                                                                                                                                                                                                                                                                                                                                                                                                                                                                                                                                                                                                                                                                                                                          | Phase 2         | 20  | April 2013 | 18-Dec-19 |
| G-CSF | NCT00424840 | Phase I/II Study to Evaluate the Efficacy and Safety of a Combination Chemotherapy                                                                                    | Terminated | Lung Cancer                                                                    | Drug: Bortezomib 1.3 mg/m2 Drug: Bortezomib 1.6 mg/m2 Drug: Bortezomib 1.8 mg/m2 Drug: Carboplatin AUC 6 Drug: Bevacizumab Drug: Taxotere                                                                                                                                                                                                | Number of Subjects Who Require Dose Delay/Reduction in Dose of Bortezomib in the First Cycle                                                                                                                                                                                                                                                                                                                                                                                                                                                                                                                                                                                                                                                                                                                                                                                                                                                                                                                                          | Phase 1         | 12  | Jun-06     | 1-Feb-19  |
| G-CSF | NCT00109837 | S0333 Combination Chemotherapy in Treating Patients With Newly Diagnosed Acute Lymphoblastic Leukemia                                                                 | Completed  | Leukemia                                                                       | Biological: filgrastim Drug: cyclophosphamide Drug: cytarabine Drug: daunorubicin Drug: dexamethasone Drug: doxorubicin Drug: leucovorin Drug: mercaptopurine Drug: methotrexate Drug: mitoxantrone Drug: Asparaginase Drug: prednisone Drug: thioguanine Drug: vincristine Radiation: radiation therapy Drug: allopurinol Drug: bactrim | Continuous Complete Remission at 1 Year Toxicity                                                                                                                                                                                                                                                                                                                                                                                                                                                                                                                                                                                                                                                                                                                                                                                                                                                                                                                                                                                      | Phase 2         | 79  | April 2005 | 25-Mar-15 |
| G-CSF | NCT00046930 | Daunorubicin & Cytarabine +/- Zosuquidar in Treating Older Patients With Newly Diagnosed Acute Myeloid Leukemia or Refractory Anemia                                  | Completed  | Leukemia Myelodysplastic Syndromes                                             | Biological: filgrastim Biological: sargramostim Drug: cytarabine Drug: daunorubicin hydrochloride Drug: zosuquidar trihydrochloride Drug: Placebo                                                                                                                                                                                        | Overall Survival (OS) Progression-free Survival (PFS) Response                                                                                                                                                                                                                                                                                                                                                                                                                                                                                                                                                                                                                                                                                                                                                                                                                                                                                                                                                                        | Phase 3         | 449 | Jul-02     | 26-Jun-15 |
| G-CSF | NCT00354172 | Donor Umbilical Cord Blood Natural Killer Cells, Aldesleukin and Umbilical Cord Blood Transplant in Patients With Refractory Hematologic Cancers.                     | Terminated | Leukemia Myelodysplastic Syndromes                                             | Biological: aldesleukin Biological: filgrastim Biological: natural killer cell (NK) therapy Drug: cyclophosphamide Drug: cyclosporine Drug: fludarabine phosphate Drug: methylprednisolone Drug: mycophenolate mofetil Procedure: Umbilical Cord Blood Transplantation (UCBT) Radiation: Total body irradiation (TBI)                    | Number of Participants (Patients) Who Were Disease-free and Alive at 6 Months Number of Participants (Patients) Who Were Disease-free and Alive at 12 Months Number of Participants Who Were Disease-free and Alive at 24 Months Number of Participants (Patients) Who Died Due to Transplant Number of Participants (Patients) Who Attained Neutrophil Engraftment Number of Participants (Patients) Who Attained Platelet Engraftment Number of Participants (Patients) With Acute Graft-versus-host Disease (GVHD) Grade II-IV Number of Participants (Patients) With Acute Graft-versus-Host Disease at Grade III-IV Number of Participants (Patients) With Chronic Graft-versus-Host Disease Number of Participants (Patients) Who Died by 12 Months Number of Participants (Patients) Who Died by 24 Months Number of Participants (Patients) Who Experienced Relapse by 12 Months Number of Participants (Patients) Who Experienced Relapse by 24 Months Number of Participants (Patients) With Successful Natural Killer Cell | Phase 2         | 16  | Feb-06     | 28-Dec-17 |
| G-CSF | NCT00704938 | Gene-Modified Lymphocytes, High-Dose Aldesleukin, and Vaccine Therapy in Treating Patients With Progressive or Recurrent Metastatic Cancer                            | Terminated | Kidney Cancer Melanoma (Skin) Unspecified Adult Solid Tumor, Protocol Specific | Biological: aldesleukin Biological: anti-p53 T-cell receptor-transduced peripheral blood lymphocytes Biological: autologous dendritic cell-adenovirus p53 vaccine Biological: filgrastim Drug: cyclophosphamide Drug: fludarabine phosphate                                                                                              | Clinical Response (Complete Response + Partial Response) Number of Participants With Adverse Events                                                                                                                                                                                                                                                                                                                                                                                                                                                                                                                                                                                                                                                                                                                                                                                                                                                                                                                                   | Phase 2         | 3   | Jun-08     | 28-Oct-15 |
| G-CSF | NCT00058825 | Stem Cell Transplant for Hematologic Diseases                                                                                                                         | Terminated | Hematologic Malignancies                                                       | Biological: Campath 1H Drug: Fludarabine Procedure: Stem Cell Transplant Radiation: Total Body Irradiation (TBI) Drug: FK506 (Tacrolimus) or                                                                                                                                                                                             | Transplant Related Mortality (TRM) Time in Days to ANC Engraftment Donor Chimerism Engraftment of Greater Than 50% Acute Graft Versus Host Disease Chronic Graft Versus Host Disease 2-year Relapse-free Survival 2-year Overall Survival Number of Patients Who Engrafted With the Isolex CLINIMACs System Median Time to Engraftment With the                                                                                                                                                                                                                                                                                                                                                                                                                                                                                                                                                                                                                                                                                       | Phase 1 Phase 2 | 27  | Aug-00     | 7-Nov-16  |
| G-CSF | NCT00073983 | Gemcitabine and Docetaxel in Treating Patients With Recurrent Osteosarcoma (Closed to Accrual as of 12/21/06) or Ewing's Sarcoma or Unresectable or Locally Recurrent | Completed  | Sarcoma                                                                        | Biological: filgrastim Biological: pegfilgrastim Drug: docetaxel Drug: gemcitabine hydrochloride Genetic: microarray analysis Other: laboratory biomarker analysis Other: pharmacokinetic                                                                                                                                                | Objective Response Rate Time to Progression Toxicity as Assessed by NCI CTCAE v3.0 Pharmacokinetics of Gemcitabine Alone and Gemcitabine Followed by Docetaxel at Protocol Specified Timeframe in Participants Enrolled on Study                                                                                                                                                                                                                                                                                                                                                                                                                                                                                                                                                                                                                                                                                                                                                                                                      | Phase 2         | 54  | Oct-06     | 12-Mar-12 |
| G-CSF | NCT00337987 | A Pilot Study to Determine the Safety of the Combination of Ontak in Combination With CHOP in Peripheral T-Cell Lymphoma                                              | Completed  | Peripheral T-Cell Lymphoma                                                     | Drug: Ontak Drug: CHOP (cyclophosphamide (C), adriamycin (H), vincristine (O), and prednisone (P)) chemotherapy                                                                                                                                                                                                                          | Number of Patients That Achieved a Complete Response or a Partial Response (PR) Number of Patients That Achieved a Complete Response (CR)                                                                                                                                                                                                                                                                                                                                                                                                                                                                                                                                                                                                                                                                                                                                                                                                                                                                                             | Phase 2         | 49  | Nov-05     | 27-Feb-15 |

|       |             |                                                                                                                                                                                                       |            |                                                                                                                                                                                                                     |                                                                                                                                                                                                                                                                                                                                                                                                                                                                                                                                                                                      |                                                                                                                                                                                                                                                                                                                                                                                     |                 |     |            |           |
|-------|-------------|-------------------------------------------------------------------------------------------------------------------------------------------------------------------------------------------------------|------------|---------------------------------------------------------------------------------------------------------------------------------------------------------------------------------------------------------------------|--------------------------------------------------------------------------------------------------------------------------------------------------------------------------------------------------------------------------------------------------------------------------------------------------------------------------------------------------------------------------------------------------------------------------------------------------------------------------------------------------------------------------------------------------------------------------------------|-------------------------------------------------------------------------------------------------------------------------------------------------------------------------------------------------------------------------------------------------------------------------------------------------------------------------------------------------------------------------------------|-----------------|-----|------------|-----------|
| G-CSF | NCT01731886 | Lenalidomide and Dexamethasone With/Without Stem Cell Transplant in Patients With Multiple Myeloma                                                                                                    | Completed  | Multiple Myeloma                                                                                                                                                                                                    | Procedure: Autologous peripheral blood stem cell transplant Drug: Lenalidomide Drug: Dexamethasone Procedure: Stem cell collection Drug: Melphalan Drug: G-CSF Drug: Cyclophosphamide Drug: Mesna                                                                                                                                                                                                                                                                                                                                                                                    | Complete Response Rate Overall Survival Rate (OS) Progression Free Survival (PFS)                                                                                                                                                                                                                                                                                                   | Phase 4         | 60  | Sep-12     | 5-Feb-20  |
| G-CSF | NCT00665457 | Biomarkers in Women Receiving Chemotherapy and Celecoxib for Stage II or Stage III Breast Cancer That Can Be Removed by Surgery                                                                       | Terminated | Breast Cancer                                                                                                                                                                                                       | Biological: filgrastim Drug: capecitabine Drug: celecoxib Drug: cyclophosphamide Drug: docetaxel Drug: doxorubicin hydrochloride Genetic: gene expression analysis Genetic: polymorphism analysis Genetic: protein expression analysis Genetic: reverse transcriptase-polymerase chain reaction Other: imaging biomarker analysis Other: immunohistochemistry staining method Other: laboratory biomarker analysis Other: pharmacogenomic studies Procedure: dynamic contrast-enhanced magnetic resonance imaging Procedure: needle biopsy Procedure: neoadjuvant therapy Procedure: | Number of Participants With Grade 4 Adverse Events Participants Who Experienced Pathologic Complete Response, Progression-free and Overall Survival, and Time to Treatment Failure                                                                                                                                                                                                  | Phase 2         | 3   | April 2004 | 10-Jul-18 |
| G-CSF | NCT00185640 | Allogeneic Transplantation Using Total Lymphoid Irradiation (TLI) and Anti-Thymocyte Globulin (ATG) for Older Patients With Hematologic                                                               | Completed  | Blood Cancer Leukemia                                                                                                                                                                                               | Drug: Cyclosporine Drug: Anti-Thymocyte Globulin Drug: mycophenolate mofetil Drug: Granulocyte-Colony Stimulating Factor Radiation: Total Lymphoid Irradiation                                                                                                                                                                                                                                                                                                                                                                                                                       | Acute Graft vs Host Disease (GvHD) Acute Graft vs Host Disease (GvHD), All Evaluable Incidence of Relapse Overall Survival (OS) Event-free Survival (EFS) Transplant-related Mortality                                                                                                                                                                                              | Phase 2         | 303 | Mar-03     | 3-Oct-17  |
| G-CSF | NCT01118013 | Donor Stem Cell Transplant in Treating Patients With Relapsed Hematologic Malignancies or Secondary Myelodysplasia Previously Treated With High-Dose Chemotherapy and Autologous Stem Cell Transplant | Terminated | Leukemia Lymphoma Lymphoproliferative Disorder Multiple Myeloma and Plasma Cell Neoplasm Myelodysplastic Syndromes Myelodysplastic/Myeloproliferative Neoplasms                                                     | Biological: anti-thymocyte globulin Biological: donor lymphocytes Biological: filgrastim Biological: therapeutic allogeneic lymphocytes Drug: busulfan Drug: fludarabine phosphate Drug: methotrexate Drug: mycophenolate mofetil Drug: tacrolimus Other: reduced-intensity transplant conditioning procedure Procedure: allogeneic hematopoietic stem cell transplantation Procedure: peripheral blood stem cell transplantation                                                                                                                                                    | Event-free Survival (EFS) Comparison of EFS Distribution to That of CALGB-100002 Complete Response Rate Overall Survival Rate of Opportunistic Infections                                                                                                                                                                                                                           | Phase 2         | 6   | Dec-10     | 24-Mar-17 |
| G-CSF | NCT00070135 | Fludarabine and Busulfan Followed by Allogeneic Stem Cell Transplant in Treating Older Patients With Acute Myeloid Leukemia in First Complete Remission                                               | Completed  | Adult Acute Myeloid Leukemia in Remission Acute Myeloid Leukemia Arising From Previous Myelodysplastic Syndrome                                                                                                     | Biological: filgrastim Biological: Anti-Thymocyte Globulin Drug: busulfan Drug: fludarabine phosphate Drug: methotrexate Drug: tacrolimus Procedure: Allogeneic Hematopoietic Stem Cell                                                                                                                                                                                                                                                                                                                                                                                              | 2 Year Disease Free Survival In Unrelated Donor Recipient Group 2 Year DFS for All Patients Non-relapse Mortality (NRM)                                                                                                                                                                                                                                                             | Phase 2         | 121 | Jan-04     | 12-Jun-18 |
| G-CSF | NCT00096382 | Cyclophosphamide, Fludarabine, and Total-Body Irradiation Followed by Cellular Adoptive Immunotherapy, Autologous Stem Cell Transplantation, and Interleukin-2 in Treating Patients With Metastatic   | Completed  | Melanoma (Skin)                                                                                                                                                                                                     | Biological: aldesleukin Biological: filgrastim Biological: therapeutic tumor infiltrating lymphocytes Drug: cyclophosphamide Drug: fludarabine phosphate Radiation: radiation therapy                                                                                                                                                                                                                                                                                                                                                                                                | Clinical Tumor Regression Safety                                                                                                                                                                                                                                                                                                                                                    | Phase 2         | 34  | Sep-04     | 28-Oct-15 |
| G-CSF | NCT00609739 | Cytosine Arabinoside and Mitoxantrone for Patients With Juvenile Myelomonocytic Leukemia Receiving Repeat Stem Cell Transplantation                                                                   | Terminated | Leukemia                                                                                                                                                                                                            | Drug: cyclosporine Drug: cytarabine Drug: filgrastim Drug: methotrexate Drug: methylprednisolone Drug: mitoxantrone hydrochloride Procedure: allogeneic bone marrow transplantation Procedure: umbilical cord blood transplantation Drug:                                                                                                                                                                                                                                                                                                                                            | Disease-free Survival Patients With Regimen-Related Toxicity Patients With Graft-Versus-Host-Disease Patients Who Relapsed                                                                                                                                                                                                                                                          | Phase 1 Phase 2 | 1   | Jun-99     | 28-Dec-17 |
| G-CSF | NCT00571662 | Safety and Efficacy of Pentostatin and Low Dose TBI With Allogeneic Peripheral Blood Stem Cell Transplant                                                                                             | Completed  | Acute Myelogenous Leukemia Acute Lymphocytic Leukemia Chronic Myelogenous Leukemia Chronic Lymphocytic Leukemia Myelodysplastic Syndromes Multiple Myeloma Non-Hodgkins Lymphoma Hodgkins Disease Peripheral T-cell | Drug: Pentostatin Radiation: Total-body irradiation (TBI) Drug: Cyclosporine A (CsA) Drug: Mycophenolate Mofetil (MMF) Drug: G-CSF                                                                                                                                                                                                                                                                                                                                                                                                                                                   | Percent of Participants With Chimerism: Full Donor Chimerism Defined as >95% Donor CD3+ Cell in Blood as Assessed by DNA Fingerprinting Toxicity for the Combination of Pentostatin and Low Dose Total Body Irradiation (TBI) Incidence of Acute and Chronic Graft-versus-host Disease Responses to Therapy Kinetics of Immunologic Reconstitution After Allogeneic Transplantation | Phase 2         | 76  | Dec-00     | 20-Nov-18 |

|       |             |                                                                                                                                                                                                         |            |                                                                                                                                                                                                                                                                                                                                     |                                                                                                                                                                                                                                                                                                                                                                                                                                                                                      |                                                                                                                                                                                                                                                                                                                                        |         |      |            |                |
|-------|-------------|---------------------------------------------------------------------------------------------------------------------------------------------------------------------------------------------------------|------------|-------------------------------------------------------------------------------------------------------------------------------------------------------------------------------------------------------------------------------------------------------------------------------------------------------------------------------------|--------------------------------------------------------------------------------------------------------------------------------------------------------------------------------------------------------------------------------------------------------------------------------------------------------------------------------------------------------------------------------------------------------------------------------------------------------------------------------------|----------------------------------------------------------------------------------------------------------------------------------------------------------------------------------------------------------------------------------------------------------------------------------------------------------------------------------------|---------|------|------------|----------------|
| G-CSF | NCT00450801 | R-MACLO-IVAM and Thalidomide in Untreated Mantle Cell Lymphoma                                                                                                                                          | Completed  | Lymphoma                                                                                                                                                                                                                                                                                                                            | Drug: Rituximab Drug: Cyclophosphamide Drug: Doxorubicin Drug: Ifosfamide Drug: Methotrexate Drug: Vincristine Drug: Mesnal Drug: Filgrastim Drug: Cytarabine Drug: Etoposide Drug: Leucovorin Drug: Thalidomide Drug: Mesnal Drug: Filgrastim                                                                                                                                                                                                                                       | Progression-free Survival Rate Overall Survival Rate Response Rate Number of Patients Experiencing Adverse Events.                                                                                                                                                                                                                     | Phase 2 | 22   | April 2004 | 10-Nov-15      |
| G-CSF | NCT00119262 | Bevacizumab and Combination Chemotherapy in Patients With Lymph Node Positive Breast Cancer                                                                                                             | Completed  | Male Breast Cancer Stage II Breast Cancer Stage IIIA Breast Cancer Stage IIIB Breast Cancer                                                                                                                                                                                                                                         | Drug: doxorubicin hydrochloride Drug: cyclophosphamide Biological: bevacizumab Drug: paclitaxel Biological: filgrastim Biological: pegfilgrastim Radiation: radiation therapy Drug: tamoxifen citrate Drug: aromatase inhibition therapy                                                                                                                                                                                                                                             | Congestive Heart Failure Rate Proportion of Patients With Absolute Decrease in Left Ventricular Ejection Fraction (LVEF) Levels Post Doxorubicin and Cyclophosphamide(AC) Proportion of Patients With Absolute Decrease in LVEF Levels Post Bevacizumab                                                                                | Phase 2 | 226  | Oct-05     | 15-May-14      |
| G-CSF | NCT00186628 | Phase 2 Trial of Prophylactic Rituximab Therapy for Prevention of CGVHD                                                                                                                                 | Completed  | Leukemia, Mast-Cell Mantle-cell Lymphoma                                                                                                                                                                                                                                                                                            | Procedure: Total lymphoid irradiation Drug: Rituximab Drug: Anti-thymoglobulin, rabbit (ATG, rabbit ATG) Drug: Cyclosporine Drug: Mycophenylate mofetil Drug: Filgrastim Drug: Granisetron Drug: Solumedrol Drug: Acetaminophen Drug: Diphenhydramine Drug: Hydrocortisone                                                                                                                                                                                                           | Chronic Graft-vs-Host Disease (cGVHD) Incidence of Relapse Mortality Overall Survival                                                                                                                                                                                                                                                  | Phase 2 | 36   | Jun-05     | 28-Nov-17      |
| G-CSF | NCT00084838 | Chemotherapy Combined With Radiation Therapy for Newly Diagnosed CNS AT/RT                                                                                                                              | Completed  | Central Nervous System Tumor, Pediatric                                                                                                                                                                                                                                                                                             | Biological: filgrastim Drug: cisplatin Drug: cyclophosphamide Drug: cytarabine Drug: dexrazoxane hydrochloride Drug: doxorubicin hydrochloride Drug: etoposide Drug: leucovorin calcium Drug: methotrexate Drug: temozolomide Drug: therapeutic hydrocortisone Drug: vincristine sulfate Radiation: radiation therapy Drug: Biological: filgrastim Biological: pegfilgrastim Drug: cisplatin Drug: docetaxel Drug: fluorouracil Procedure: conventional surgery Radiation: radiation | 2-yr Overall Survival Pre-Radiation Therapy Chemotherapeutic Response                                                                                                                                                                                                                                                                  | Phase 2 | 25   | Feb-03     | 24-Dec-15      |
| G-CSF | NCT00352118 | Combination Chemotherapy and Radiation Therapy in Treating Patients With Locally Advanced Head and Neck Cancer                                                                                          | Terminated | Head and Neck Cancer                                                                                                                                                                                                                                                                                                                | Biological: filgrastim Biological: pegfilgrastim Drug: cisplatin Drug: docetaxel Drug: fluorouracil Procedure: conventional surgery Radiation: radiation                                                                                                                                                                                                                                                                                                                             | Number of Patients With Feeding Tube Dependency Number of Days With Progression-free Survival Number of Days - Overall Survival Number of Days With Disease Free Survival Time to Treatment Failure Swallowing Ability - Quality of Life Scores Quality of Life (QOL) by Functional Assessment of Cancer Therapy-H&N QOL Questionnaire | Phase 2 | 4    | Mar-06     | 28-Dec-17      |
| G-CSF | NCT00366275 | Immunochemotherapy, in Vivo Purging, PBSC Mobilization and Autotransplant in Relapsed or Refractory Follicular Lymphoma                                                                                 | Completed  | Follicular Lymphoma                                                                                                                                                                                                                                                                                                                 | Procedure: Immunochemotherapy, in vivo purging and autotransplant                                                                                                                                                                                                                                                                                                                                                                                                                    | Progression-free Survival                                                                                                                                                                                                                                                                                                              | Phase 2 | 64   | Jan-02     | 31-Oct-12      |
| G-CSF | NCT01390402 | Alloreactive Haploidentical Natural Killer (NK) Cells With Busulfan and Fludarabine/ATG                                                                                                                 | Completed  | Leukemia Chronic Myelogenous Leukemia                                                                                                                                                                                                                                                                                               | Drug: Fludarabine Drug: Busulfan Procedure: NK cell infusion Drug: Interleukin-2 Drug: Anti-Thymocyte Globulin Procedure: Allogeneic related Stem Cell Transplant Drug: Biological: Bleomycin Sulfate Drug: Cisplatin Drug: Cyclophosphamide Drug: Cytarabine Drug: Dexamethasone Drug: Doxorubicin Hydrochloride Drug: Etoposide Biological: Filgrastim Radiation: Involved-Field Radiation Therapy Drug: Prednisone Drug: Vincristine Sulfate                                      | Number of Participants With Molecular Complete Remission at 3 Month Post Transplant                                                                                                                                                                                                                                                    | Phase 2 | 6    | Jan-12     | 3-Feb-16       |
| G-CSF | NCT00047320 | Neoadjuvant Chemotherapy With or Without Second-Look Surgery Followed by Radiation Therapy With or Without Peripheral Stem Cell Transplantation in Treating Patients With Intracranial Germ Cell Tumors | Completed  | Brain Tumor Central Nervous System Tumors Childhood Germ Cell Tumor                                                                                                                                                                                                                                                                 | Drug: carboplatin Drug: etoposide Drug: ifosfamide Drug: thiotepa Procedure: adjuvant therapy Procedure: conventional surgery Procedure: neoadjuvant therapy Procedure: peripheral blood stem cell transplantation Radiation: radiation                                                                                                                                                                                                                                              | Response to Induction Chemotherapy The Probability of Event-free Survival (EFS) Progression-free Survival (PFS) Overall Survival (OS) Number of Patients Experiencing Toxic Death Occurrence of Non-hematological Grade 4 Toxicity Occurrence of Nonhematological Grade 4 Toxicity                                                     | Phase 2 | 104  | Jan-04     | 14-Feb-18      |
| G-CSF | NCT00025259 | Chemotherapy With or Without Additional Chemotherapy and/or Radiation Therapy in Treating Children With Newly Diagnosed Hodgkin's Disease                                                               | Completed  | Childhood Lymphocyte-Depleted Classical Hodgkin Lymphoma Childhood Mixed Cellularity Classical Hodgkin Lymphoma Childhood Nodular Lymphocyte Predominant Hodgkin Lymphoma Childhood Nodular Sclerosis Classical Hodgkin Lymphoma Stage I Childhood Hodgkin Lymphoma Stage II Childhood Hodgkin Lymphoma Stage III Childhood Hodgkin | Biological: Bleomycin Sulfate Drug: Cisplatin Drug: Cyclophosphamide Drug: Cytarabine Drug: Dexamethasone Drug: Doxorubicin Hydrochloride Drug: Etoposide Biological: Filgrastim Radiation: Involved-Field Radiation Therapy Drug: Prednisone Drug: Vincristine Sulfate                                                                                                                                                                                                              | Event-free Survival Disease Response Assessed by Modified RECIST Criteria Grade 3 or 4 Non-hematologic Toxicity Overall Survival                                                                                                                                                                                                       | Phase 3 | 1734 | Sep-02     | April 12, 2017 |
| G-CSF | NCT00948922 | Melphalan+Bortezomib as a Conditioning Regimen for Autologous and Allogeneic Stem Cell Transplants in Multiple Myeloma                                                                                  | Completed  | Multiple Myeloma                                                                                                                                                                                                                                                                                                                    | Drug: Bortezomib Drug: Melphalan Procedure: Autologous Stem Cell Transplant Drug: Fludarabine Procedure: Allogeneic Stem                                                                                                                                                                                                                                                                                                                                                             | Progression Free Survival (PFS) Overall Survival (OS) Rate Molecular Complete Response (CR) Rates in Patients With Multiple Myeloma                                                                                                                                                                                                    | Phase 2 | 124  | 18-Jun-09  | 18-Sep-19      |

|       |             |                                                                                                                                               |                        |                                                                                                                                                                                                                                                                                                                                                                 |                                                                                                                                                                                                                                                                                                                                                                                                                            |                                                                                                                                                                                                                                                                                                                                                                                                                               |                 |     |            |           |
|-------|-------------|-----------------------------------------------------------------------------------------------------------------------------------------------|------------------------|-----------------------------------------------------------------------------------------------------------------------------------------------------------------------------------------------------------------------------------------------------------------------------------------------------------------------------------------------------------------|----------------------------------------------------------------------------------------------------------------------------------------------------------------------------------------------------------------------------------------------------------------------------------------------------------------------------------------------------------------------------------------------------------------------------|-------------------------------------------------------------------------------------------------------------------------------------------------------------------------------------------------------------------------------------------------------------------------------------------------------------------------------------------------------------------------------------------------------------------------------|-----------------|-----|------------|-----------|
| G-CSF | NCT00245037 | Busulfan, Fludarabine, and Total-Body Irradiation in Treating Patients Who Are Undergoing a Donor Stem Cell Transplant for Hematologic Cancer | Completed              | Chronic Myeloproliferative Disorders Leukemia Lymphoma Multiple Myeloma and Plasma Cell Neoplasm Myelodysplastic Syndromes Myelodysplastic/Myeloproliferative Neoplasms Precancerous Condition                                                                                                                                                                  | Biological: therapeutic allogeneic lymphocytes Drug: busulfan Drug: cyclosporine Drug: fludarabine phosphate Drug: mycophenolate mofetil Procedure: peripheral blood stem cell transplantation Radiation: Total Body Irradiation (TBI) Drug: Granulocyte colony-stimulating factor (G-CSF) Drug:                                                                                                                           | Regimen-Related Toxicities Non-relapse Mortality Overall Survival Progression-Free Survival Relapse Mortality Acute Graft-Versus-Host Disease (aGVHD) Outcome Chronic Graft-Versus-Host Disease (cGVHD) Outcome                                                                                                                                                                                                               | Phase 1 Phase 2 | 147 | Jun-05     | 27-Sep-17 |
| G-CSF | NCT00890656 | Study of Augmented Hyper-CVAD in Acute Lymphoblastic Leukemia Salvage                                                                         | Completed              | Acute Lymphoblastic Leukemia                                                                                                                                                                                                                                                                                                                                    | Drug: Cyclophosphamide (CTX) Drug: Vincristine Drug: Doxorubicin Drug: Decadron Drug: G-CSF Drug: Methotrexate (MTX) Drug: Ara-C Drug: Pegaspargase                                                                                                                                                                                                                                                                        | Number of Participants With Complete Remission                                                                                                                                                                                                                                                                                                                                                                                | Phase 2         | 90  | Jun-03     | 20-Feb-12 |
| G-CSF | NCT00490529 | Phase 1-2 of a CpG-Activated Whole Cell Vaccine Followed by Autologous Immunotransplant for MCL                                               | Completed              | Lymphoma, Mantle-Cell                                                                                                                                                                                                                                                                                                                                           | Biological: CpG-MCL vaccine Biological: PF-3512676 Procedure: Vaccine-primed T-cells Procedure: Autologous hematopoietic stem cell transplant (HSCT) Drug: Rituximab Drug: Standard induction chemotherapy Drug:                                                                                                                                                                                                           | Freedom From Molecular Residual Disease (MRD) Post-autologous Stem Cell Transplant (ASCT) Time-to-progression (TTP) Overall Survival (OS) Detection of Tumor-specific CD8-positive Memory T-cells Before and After Vaccination Detection of Tumor-specific CD4-positive T-cells Before and After Vaccination                                                                                                                  | Phase 2         | 59  | Aug-09     | 13-Jan-20 |
| G-CSF | NCT00185692 | Allogeneic Transplantation From Related Haploidentical Donors                                                                                 | Completed              | Blood Cancer Leukemia Graft Versus Host Disease Maligancy CLL NHL Hodgkin's Disease MDS                                                                                                                                                                                                                                                                         | Procedure: non-myeloablative hematopoietic cell transplantation Drug: Anti-Thymocyte Globulin Drug: Cyclosporine Drug: Mycophenolate Mofetil Drug: G-CSF Drug: Solumedrol Drug: Acetaminophen Drug:                                                                                                                                                                                                                        | Engraftment of Haploidentical CD34+ Selected Blood Stem Cells in Older Patients or Those With Medical Co-morbidities Following Total Lymphoid Irradiation and Antithymocyte Globulin Transplant Conditioning Acute Graft-versus-Host Disease (GVHD) Grade 2-4 Risk From Time of Transplant Until Day 90 Post-transplant                                                                                                       | Phase 2         | 16  | Aug-00     | 4-Dec-19  |
| G-CSF | NCT00669669 | O6-Benzylguanine-Mediated Tumor Sensitization With Chemoprotected Autologous Stem Cell in Treating Patients With Malignant Gliomas            | Active, not recruiting | Glioblastoma Gliosarcoma                                                                                                                                                                                                                                                                                                                                        | Radiation: 3-Dimensional Conformal Radiation Therapy Procedure: Autologous Hematopoietic Stem Cell Transplantation Drug: Carmustine Biological: Filgrastim Procedure: In Vitro-Treated Peripheral Blood Stem Cell Transplantation Radiation: Intensity-Modulated Radiation Therapy Other: Laboratory Biomarker Analysis Drug: O6-                                                                                          | Number of Participants Dose-limiting Toxicity (DLT) Number of Participants With Retrovirus or Leukemia Response Rate Duration of Response Number of Participants That Survived Time to Progression Gene Transfer Efficiency and in Vivo Selection Number of Participants With Chemoprotection                                                                                                                                 | Phase 1 Phase 2 | 12  | 25-Feb-09  | 16-Dec-19 |
| G-CSF | NCT01798004 | Busulfan, Melphalan, and Stem Cell Transplant After Chemotherapy in Treating Patients With Newly Diagnosed High-Risk Neuroblastoma            | Active, not recruiting | Disseminated Neuroblastoma Localized Resectable Neuroblastoma Localized Unresectable Neuroblastoma Regional Neuroblastoma Stage 4S Neuroblastoma                                                                                                                                                                                                                | Drug: cyclophosphamide Drug: topotecan hydrochloride Drug: cisplatin Drug: etoposide Drug: vincristine sulfate Drug: doxorubicin hydrochloride Radiation: external beam radiation therapy Drug: busulfan Drug: melphalan Procedure: autologous hematopoietic stem cell transplantation Procedure: peripheral blood stem cell transplantation Other: pharmacological study Other: laboratory biomarker analysis Biological: | The Tolerability of BuMel Regimen                                                                                                                                                                                                                                                                                                                                                                                             | Not Applicable  | 150 | April 2013 | 22-Oct-19 |
| G-CSF | NCT01370213 | NK Cell Based Non-Myeloablative Transplantation in Acute Myeloid Diseases                                                                     | Completed              | Acute Myeloid Leukemia Myelodysplastic Syndrome                                                                                                                                                                                                                                                                                                                 | Drug: Preparative Regimen Biological: NK Cells Drug: Interleukin-2 Biological: CD34 Graft/Anti-thymocyte globulin Biological: Donor TCR $\alpha/\beta$ -depleted Graft/ATG                                                                                                                                                                                                                                                 | Number of Participants With Donor Neutrophil Engraftment Number of Participants With Disease Free Survival Number of Participants With Treatment Related Mortality (TRM) Number of Participants Who Relapse Number of Participants With Early In Vivo Expansion of Natural Killer (NK) Cells                                                                                                                                  | Phase 2         | 25  | Sep-11     | 16-Dec-19 |
| G-CSF | NCT00873093 | Bortezomib and Combination Chemotherapy in Treating Young Patients With Relapsed Acute Lymphoblastic Leukemia or Lymphoblastic Lymphoma       | Completed              | B-cell Adult Acute Lymphoblastic Leukemia B-cell Childhood Acute Lymphoblastic Leukemia Recurrent Adult Acute Lymphoblastic Leukemia Recurrent Adult Lymphoblastic Lymphoma Recurrent Childhood Acute Lymphoblastic Leukemia Recurrent Childhood Lymphoblastic Lymphoma T-cell Adult Acute Lymphoblastic Leukemia T-cell Childhood Acute Lymphoblastic Leukemia | Drug: L-asparaginase Drug: doxorubicin hydrochloride Drug: therapeutic hydrocortisone Drug: vincristine sulfate Drug: cytarabine Drug: prednisone Drug: bortezomib Drug: pegaspargase Drug: methotrexate Drug: etoposide phosphatate Drug: cyclophosphamide Biological: filgrastim Drug: leucovorin calcium Other:                                                                                                         | Second Complete Remission Rate at the End of Block 1 Reinduction Chemotherapy Event Free Survival Toxic Death Rate Severe Adverse Events (SAE) Rate. Rate of Minimal Residual Disease (MRD) < 0.01% at End Block 1 Rate of Minimal Residual Disease (MRD) < 0.01% at End Block 2 Rate of Minimal Residual Disease (MRD) < 0.01% at End Block 3                                                                                | Phase 2         | 148 | Mar-09     | 27-Jan-17 |
| G-CSF | NCT00618813 | Two Regimens of Combination Chemotherapy in Treating Younger Patients With Newly Diagnosed Localized Ewing Sarcoma Family of Tumors           | Completed              | Ewing Sarcoma of Bone Localized Ewing Sarcoma Peripheral Primitive Neuroectodermal Tumor                                                                                                                                                                                                                                                                        | Other: radiation therapy Other: therapeutic conventional surgery Drug: etoposide Drug: ifosfamide Drug: doxorubicin hydrochloride Drug: cyclophosphamide Drug: vincristine                                                                                                                                                                                                                                                 | Incidence of Death Incidence Rate (Number of Participants) of Dose-limiting Toxicity (DLT) - Enrollment to Week 12 Incidence Rate (Number of Participants) of Dose-limiting Toxicity (DLT) - Week 13 to Week 22 Incidence Rate (Number of Participants) of Dose-limiting Toxicity (DLT) - Week 23 to Week 28 Incidence Rate (Number of Participants) of Dose-limiting Toxicity (DLT) - Week 29 to Week 37 Event Free Survival | Not Applicable  | 35  | Mar-08     | 25-Sep-14 |



|       |             |                                                                                                                                                  |           |                                                                                                                                                                                                                                                                                                                                                                                                                                |                                                                                                                                                                                                                                                                                                                                                                                                                                                        |                                                                                                                                                                                                                                                                                                                                                                                                                                                                                                                                                                                                                                                                                                                                                                                                                                                                                                                                                                                                                                                      |         |     |            |             |
|-------|-------------|--------------------------------------------------------------------------------------------------------------------------------------------------|-----------|--------------------------------------------------------------------------------------------------------------------------------------------------------------------------------------------------------------------------------------------------------------------------------------------------------------------------------------------------------------------------------------------------------------------------------|--------------------------------------------------------------------------------------------------------------------------------------------------------------------------------------------------------------------------------------------------------------------------------------------------------------------------------------------------------------------------------------------------------------------------------------------------------|------------------------------------------------------------------------------------------------------------------------------------------------------------------------------------------------------------------------------------------------------------------------------------------------------------------------------------------------------------------------------------------------------------------------------------------------------------------------------------------------------------------------------------------------------------------------------------------------------------------------------------------------------------------------------------------------------------------------------------------------------------------------------------------------------------------------------------------------------------------------------------------------------------------------------------------------------------------------------------------------------------------------------------------------------|---------|-----|------------|-------------|
| G-CSF | NCT00381680 | Low-Dose or High-Dose Vincristine and Combination Chemotherapy in Treating Young Patients With Relapsed B-Cell Acute Lymphoblastic Leukemia      | Completed | B-cell Childhood Acute Lymphoblastic Leukemia L1 Childhood Acute Lymphoblastic Leukemia L2 Childhood Acute Lymphoblastic Leukemia Intermediate Risk Recurrent Childhood Acute Lymphoblastic Leukemia                                                                                                                                                                                                                           | Drug: vincristine sulfate Drug: prednisone Drug: doxorubicin hydrochloride Drug: pegaspargase Drug: cytarabine Drug: methotrexate Drug: dexa-methasone Drug: etoposide Drug: cyclophosphamide Drug: leucovorin calcium Biological: filgrastim Drug:                                                                                                                                                                                                    | Event Free Survival. EFS Frequency and Severity of Adverse Effects Gene Expression Profile Rate of Minimal Residual Disease (MRD) < 0.01% at End Block 1 Rate of Minimal Residual Disease (MRD) < 0.01% at End Block 3 Event Free Survival (EFS) Adjusted Event Free Survival                                                                                                                                                                                                                                                                                                                                                                                                                                                                                                                                                                                                                                                                                                                                                                        | Phase 3 | 275 | Mar-07     | 12-May-17   |
| G-CSF | NCT01158118 | Plerixafor and Sargramostim (GM-CSF) for Mobilization of Allogeneic Sibling Donors                                                               | Completed | Leukemia, Myeloid, Acute Myelodysplastic Syndromes Lymphoma, Non-Hodgkin Hodgkin Disease Leukemia, Lymphocytic, Chronic, B-Cell Multiple Myeloma                                                                                                                                                                                                                                                                               | Drug: Sargramostim Drug: Plerixafor                                                                                                                                                                                                                                                                                                                                                                                                                    | Number of Donors Requiring a Second Collection to Obtain a Minimum CD34/Kg (2 x 10 <sup>6</sup> ) Necessary for Allogeneic Stem Cell Transplantation Proportion of Donors Who Experience Grade 3-4 Infusion Toxicity Number of Donors Who Mobilize ≥ 2x10 <sup>6</sup> CD34+ Cells/Kg Recipient Weight Safely Following One or Two Aphereses Percentage of Donors Who Reach 5x10 <sup>6</sup> CD34+ Cells/Kg Recipient Weight in 1 or 2 Aphereses Determine if Peripheral Blood Stem Cell Products Collected After Mobilization With IV Plerixafor Can be Used Safely for Hematopoietic Cell Transplantation in HLA-matched Recipients as Measured by Time to Neutrophil Engraftment (Recipient Only) Kinetics of Immune Reconstitution as Measured by Time to Neutrophil Engraftment (Recipient Only) Kinetics of Immune Reconstitution as Measured by Time to Platelet Engraftment (Recipient Only) Rate of Acute Graft vs. Host Disease (GvHD) (Recipient Only) Rate of Chronic Graft vs. Host Disease (GvHD) (Recipient Only) Transplant Related | Phase 2 | 48  | April 2011 | 1, 5-Jun-17 |
| G-CSF | NCT00864227 | Evaluating the Safety and Effectiveness of an Umbilical Cord Blood Stem Cell Transplant (BMT CTN 0604)                                           | Completed | Precursor B-Cell Lymphoblastic Leukemia-Lymphoma Leukemia, Myeloid, Acute Burkitt Lymphoma Lymphoma, B-Cell Lymphoma, Follicular Lymphoma, Large B-Cell, Diffuse                                                                                                                                                                                                                                                               | Biological: Hematopoietic Umbilical Cord Blood Stem Cell Transplantation Biological: GVHD prophylaxis                                                                                                                                                                                                                                                                                                                                                  | Overall Survival at 180 Days From the Time of Transplant Neutrophil Recovery Primary Graft Failure Secondary Graft Failure Platelet Recovery to 20K Donor Cell Engraftment Acute Graft-versus-host Disease (GVHD) Chronic GVHD Progression-free Survival Treatment-related Mortality (TRM) Incidence of Infections Platelet Recovery to 50K                                                                                                                                                                                                                                                                                                                                                                                                                                                                                                                                                                                                                                                                                                          | Phase 2 | 54  | Dec-08     | 27-Oct-17   |
| G-CSF | NCT00057811 | Rituximab, Rasburicase, and Combination Chemotherapy in Treating Young Patients With Newly Diagnosed Advanced B-Cell Leukemia or Lymphoma        | Completed | Childhood Burkitt Lymphoma Childhood Diffuse Large Cell Lymphoma Childhood Immunoblastic Large Cell Lymphoma Stage I Childhood Large Cell Lymphoma Stage I Childhood Small Noncleaved Cell Lymphoma Stage II Childhood Large Cell Lymphoma Stage II Childhood Small Noncleaved Cell Lymphoma Stage III Childhood Large Cell Lymphoma Stage III Childhood Small Noncleaved Cell Lymphoma Stage IV Childhood Large Cell Lymphoma | Drug: doxorubicin hydrochloride Drug: cyclophosphamide Drug: methotrexate Drug: rasburicase Drug: leucovorin calcium Drug: prednisone Drug: methylprednisolone Biological: filgrastim Biological: rituximab Drug: cytarabine Drug: etoposide Drug: vincristine sulfate Drug: hydrocortisone sodium succinate Other: laboratory biomarker                                                                                                               | Grade ≥ 3 Stomatitis Response Rate Minimal Residual Disease Toxic Death                                                                                                                                                                                                                                                                                                                                                                                                                                                                                                                                                                                                                                                                                                                                                                                                                                                                                                                                                                              | Phase 2 | 97  | Jun-04     | 19-Sep-14   |
| G-CSF | NCT00039377 | Chemotherapy, Imatinib Mesylate, and Peripheral Stem Cell Transplantation in Treating Patients With Newly Diagnosed Acute Lymphoblastic Leukemia | Completed | Adult Acute Lymphoblastic Leukemia in Remission                                                                                                                                                                                                                                                                                                                                                                                | Drug: imatinib mesylate Drug: methotrexate Drug: vincristine sulfate Drug: leucovorin calcium Procedure: peripheral blood stem cell transplantation Procedure: autologous hematopoietic stem cell transplantation Procedure: allogeneic hematopoietic stem cell transplantation Radiation: total-body irradiation Drug: tacrolimus Biological: filgrastim Drug: etoposide Drug: cyclophosphamide Drug: cytarabine Other: laboratory biomarker analysis | Disease Free Survival Overall Survival Number of Participants Who Achieved a BCR-ABL Response at 12 Months 5 Year Disease-free Survival for Autologous & Allogeneic Transplant Groups 5 Year Overall Survival for Autologous & Allogeneic Transplant Groups                                                                                                                                                                                                                                                                                                                                                                                                                                                                                                                                                                                                                                                                                                                                                                                          | Phase 2 | 58  | April 2002 | 24-Nov-14   |

|       |             |                                                                                                                                                         |                        |                                                                                                                                                                                                                                                 |                                                                                                                                                                                                                                                                                                                                                                                                                                                                                                                                                                                                                                              |                                                                                                                                                                                                                                                                                                                                                                                                                                                                                                                                                                                                                                                                                                                                                                                                                                                                                                                                                                                                                                                                                                                                                                                                                                                                                                                                                                |                 |     |           |               |
|-------|-------------|---------------------------------------------------------------------------------------------------------------------------------------------------------|------------------------|-------------------------------------------------------------------------------------------------------------------------------------------------------------------------------------------------------------------------------------------------|----------------------------------------------------------------------------------------------------------------------------------------------------------------------------------------------------------------------------------------------------------------------------------------------------------------------------------------------------------------------------------------------------------------------------------------------------------------------------------------------------------------------------------------------------------------------------------------------------------------------------------------------|----------------------------------------------------------------------------------------------------------------------------------------------------------------------------------------------------------------------------------------------------------------------------------------------------------------------------------------------------------------------------------------------------------------------------------------------------------------------------------------------------------------------------------------------------------------------------------------------------------------------------------------------------------------------------------------------------------------------------------------------------------------------------------------------------------------------------------------------------------------------------------------------------------------------------------------------------------------------------------------------------------------------------------------------------------------------------------------------------------------------------------------------------------------------------------------------------------------------------------------------------------------------------------------------------------------------------------------------------------------|-----------------|-----|-----------|---------------|
| G-CSF | NCT01256398 | Dasatinib Followed by Stem Cell Transplant in Treating Older Patients With Newly Diagnosed Acute Lymphoblastic Leukemia                                 | Active, not recruiting | Acute Lymphoblastic Leukemia Adult B Acute Lymphoblastic Leukemia With t(9;22)(q34.1;q11.2); BCR-ABL1                                                                                                                                           | Biological: Alemtuzumab Procedure: Allogeneic Hematopoietic Stem Cell Transplantation Procedure: Autologous Hematopoietic Stem Cell Transplantation Drug: Cyclophosphamide Drug: Cytarabine Drug: Dasatinib Drug: Daunorubicin Hydrochloride Drug: Dexamethasone Drug: Etoposide Phosphate Biological: Filgrastim Drug: Fludarabine Phosphate Procedure: In Vitro-Treated Peripheral Blood Stem Cell Transplantation Other: Laboratory Biomarker Analysis Drug: Leucovorin Calcium Drug: Melphalan Drug: Mercaptopurine Drug: Methotrexate Biological: Pegfilgrastim Other: Pharmacological Study Drug: Tacrolimus Drug: Vincristine Sulfate | Disease Free Survival Defined From the Date of First Induction Complete Response (CR) to Relapse or Death Due to Any Cause Probability of Being BCR-ABL Negative in the Bone Marrow and Peripheral Blood at the Completion of the CNS Prophylaxis Course (Restricted to Those Patients Achieving a CR) Feasibility of Maintenance Therapy in This Patient Population (Restricted to Those Patients Achieving a CR) OS DFS Response                                                                                                                                                                                                                                                                                                                                                                                                                                                                                                                                                                                                                                                                                                                                                                                                                                                                                                                             | Phase 2         | 66  | 14-Dec-10 | 28-Jan-20     |
| G-CSF | NCT00334815 | Combination Chemotherapy, Radiation Therapy, and Bevacizumab in Treating Patients With Newly Diagnosed Stage III Non-small Cell Lung Cancer That Cannot | Active, not recruiting | Lung Adenocarcinoma Lung Adenosquamous Carcinoma Lung Large Cell Carcinoma Lung Squamous Cell Carcinoma Minimally Invasive Lung Adenocarcinoma Stage IIIA Lung Non-Small Cell Cancer AJCC v7 Stage IIIB Lung Non-Small Cell Cancer AJCC         | Biological: Bevacizumab Drug: Cisplatin Drug: Docetaxel Drug: Etoposide Biological: Filgrastim Biological: Pegfilgrastim Radiation: Radiation Therapy                                                                                                                                                                                                                                                                                                                                                                                                                                                                                        | Adverse Events Progression-free Survival Overall Survival Response Rate (Confirmed or Unconfirmed Partial Response)                                                                                                                                                                                                                                                                                                                                                                                                                                                                                                                                                                                                                                                                                                                                                                                                                                                                                                                                                                                                                                                                                                                                                                                                                                            | Phase 2         | 29  | 15-Jun-06 | 29-Jan-20     |
| G-CSF | NCT00389818 | Combination Chemotherapy and Rituximab in Treating Patients With Newly Diagnosed AIDS-Related B-Cell Non-Hodgkin's Lymphoma                             | Completed              | Lymphoma                                                                                                                                                                                                                                        | Biological: filgrastim Biological: pegfilgrastim Biological: rituximab Biological: sargramostim Drug: cyclophosphamide Drug: pegylated liposomal doxorubicin hydrochloride Drug: prednisone Drug: vincristine sulfate Other: immunohistochemistry staining method Other: laboratory biomarker                                                                                                                                                                                                                                                                                                                                                | Complete Response Rate (Complete Response and Complete Response Unconfirmed) Defined as Disappearance of All Evidence of Disease Based on Radiographic Findings on CT or MRI . Duration of Response Median Survival Time Rate of Bacterial, Fungal, and Opportunistic Infections Relationship Between MDR-1 Expression and Response to Treatment Relationship Between Response and Survival and BCL-2 Expression in Tumor Tissue Relationship Between Development of Bacterial, Fungal, and/or Opportunistic Infections and Baseline CD4 Lymphocyte Count, HIV-1 RNA Level, and Quantitative Immunoglobulin Level. or Changes in Quantitative Immunoglobulin Levels Over Time Mortality                                                                                                                                                                                                                                                                                                                                                                                                                                                                                                                                                                                                                                                                        | Phase 2         | 43  | Jan-07    | 6-Jun-18      |
| G-CSF | NCT00088985 | Vaccine Therapy, Trastuzumab, and Vinorelbine in Treating Women With Locally Recurrent or Metastatic Breast Cancer                                      | Terminated             | Breast Cancer                                                                                                                                                                                                                                   | Biological: therapeutic autologous dendritic cells Biological: trastuzumab Drug: vinorelbine ditartrate                                                                                                                                                                                                                                                                                                                                                                                                                                                                                                                                      | Overall Response Rate Immune Response                                                                                                                                                                                                                                                                                                                                                                                                                                                                                                                                                                                                                                                                                                                                                                                                                                                                                                                                                                                                                                                                                                                                                                                                                                                                                                                          | Phase 2         | 56  | Jan-04    | 20-Jun-17     |
| G-CSF | NCT00720109 | Dasatinib and Combination Chemotherapy in Treating Young Patients With Newly Diagnosed Acute Lymphoblastic Leukemia                                     | Completed              | Adult B Acute Lymphoblastic Leukemia With t(9;22)(q34;q11.2); BCR-ABL1 Childhood B Acute Lymphoblastic Leukemia With t(9;22)(q34;q11.2); BCR-ABL1 Untreated Adult Acute Lymphoblastic Leukemia Untreated Childhood Acute Lymphoblastic Leukemia | Drug: Asparaginase Drug: Cyclophosphamide Drug: Cytarabine Drug: Dasatinib Drug: Daunorubicin Hydrochloride Drug: Dexamethasone Drug: Etoposide Biological: Filgrastim Drug: Hydrocortisone Sodium Succinate Drug: Ifosfamide Other: Laboratory Biomarker Analysis Drug: Leucovorin Calcium Drug: Mercaptopurine Drug: Methotrexate Drug: Methylprednisolone Drug: Pegasparase Drug: Prednisone Radiation:                                                                                                                                                                                                                                   | Event-Free Survival (EFS) of Patients With Standard-risk Disease Treated With Dasatinib in Combination With Intensified Chemotherapy Feasibility and Toxicity of an Intensified Chemotherapeutic Regimen Incorporating Dasatinib for Treatment of Children and Adolescents With Ph+ ALL Assessed by Examining Adverse Events Contribution of Dasatinib on Minimal Residual Disease (MRD) After Induction Therapy Percent of Patients MRD Positive (MRD > 0.01%) at End of Consolidation Overall EFS Rate for the Combined Cohort of Standard- and High-Risk Patients (Who Receive the Final Chosen Dose of Dasatinib)                                                                                                                                                                                                                                                                                                                                                                                                                                                                                                                                                                                                                                                                                                                                          | Phase 2 Phase 3 | 63  | Jul-08    | 7-Oct-16      |
| G-CSF | NCT00557193 | Combination Chemotherapy With or Without Lestaurtinib in Treating Younger Patients With Newly Diagnosed Acute Lymphoblastic Leukemia                    | Completed              | Acute Lymphoblastic Leukemia Acute Undifferentiated Leukemia Childhood T Acute Lymphoblastic Leukemia Untreated Childhood Acute Lymphoblastic Leukemia                                                                                          | Drug: Asparaginase Drug: Cyclophosphamide Drug: Cytarabine Drug: Daunorubicin Hydrochloride Drug: Dexamethasone Drug: Etoposide Biological: Filgrastim Other: Laboratory Biomarker Analysis Drug: Lestaurtinib Drug: Leucovorin Calcium Drug: Mercaptopurine Drug: Methotrexate Drug: Methylprednisolone Drug: Pegasparase Other: Pharmacological Study Drug: Prednisone Drug: Therapeutic Hydrocortisone Drug: Vincristine Sulfate                                                                                                                                                                                                          | Percent Probability for Event-free Survival (EFS) for Patients on Arm C at Dose Level 2 (DL2) Percent Probability for Event-free Survival (EFS) of MLL-R Infants Treated With Combination Chemotherapy With or Without Lestaurtinib at DL2 Number of Patients Who Experienced Lestaurtinib-related Dose Limiting Toxicity (DLT) Pharmacokinetic AGP Levels in Infants Given Lestaurtinib at DL2 in Combination With Chemotherapy Pharmacokinetic Albumin in Infants Given Lestaurtinib at DL2 in Combination With Chemotherapy Pharmacodynamics PIA Levels in Infants Given Lestaurtinib at DL2 in Combination With Chemotherapy Describe FLT3 Protein Expression as a Molecular Mechanism of Primary Resistance to Lestaurtinib in Leukemic Blasts Describe FLT3 Protein Expression as a Molecular Mechanism of Acquired Resistance to Lestaurtinib in Leukemic Blasts Describe In Vitro Sensitivity as a Molecular Mechanism of Primary Resistance to Lestaurtinib in Leukemic Blasts Describe In Vitro Sensitivity as a Molecular Mechanism of Acquired Resistance to Lestaurtinib in Leukemic Blasts Percent Probability of Event Free Survival (EFS) by MRD Status and Treatment Arm Identification of Gene Expression Patterns in Diagnostic Infant Leukemia Samples That Correlate With Survival Outcomes Identification of Gene Expression Patterns in | Phase 3         | 218 | 14-Jan-08 | April 9, 2019 |

|       |             |                                                                                                                                                |                        |                                                                                                                                                                                                                                                                                                                                                                                                        |                                                                                                                                                                                                                                                                                                                                                                                                                                                                                                                              |                                                                                                                                                                                                                                                                                                                                                                                                                                                                                                                                                                                                                                                                                                                                                                                                                                                                                                                        |                 |     |           |                |
|-------|-------------|------------------------------------------------------------------------------------------------------------------------------------------------|------------------------|--------------------------------------------------------------------------------------------------------------------------------------------------------------------------------------------------------------------------------------------------------------------------------------------------------------------------------------------------------------------------------------------------------|------------------------------------------------------------------------------------------------------------------------------------------------------------------------------------------------------------------------------------------------------------------------------------------------------------------------------------------------------------------------------------------------------------------------------------------------------------------------------------------------------------------------------|------------------------------------------------------------------------------------------------------------------------------------------------------------------------------------------------------------------------------------------------------------------------------------------------------------------------------------------------------------------------------------------------------------------------------------------------------------------------------------------------------------------------------------------------------------------------------------------------------------------------------------------------------------------------------------------------------------------------------------------------------------------------------------------------------------------------------------------------------------------------------------------------------------------------|-----------------|-----|-----------|----------------|
| G-CSF | NCT00416598 | Decitabine as Maintenance Therapy After Standard Therapy in Treating Patients With Previously Untreated Acute Myeloid Leukemia                 | Completed              | Acute Myeloid Leukemia Acute Myeloid Leukemia With Myelodysplasia-Related Changes Adult Acute Myeloid Leukemia With Inv(16)(p13.1;q22); CBFB-MYH11 Adult Acute Myeloid Leukemia With t(16;16)(p13.1;q22); CBFB-MYH11 Adult Acute Myeloid Leukemia With t(8;21); (q22; q22.1); RUNX1-RUNX1T1 Adult Acute Myeloid Leukemia With t(9;11)(p22.3;q23.3); MLLT3-KMT2A Untreated Adult Acute Myeloid Leukemia | Procedure: Autologous Bone Marrow Transplantation Procedure: Autologous Hematopoietic Stem Cell Transplantation Drug: Busulfan Drug: Cytarabine Drug: Daunorubicin Hydrochloride Drug: Decitabine Drug: Etoposide Biological: Filgrastim Other: Laboratory Biomarker Analysis Other: Biological: recombinant fowipox-CEA(6D)/TRICOM vaccine Biological: recombinant vaccinia-CEA(6D)/TRICOM vaccine Biological: filgrastim Biological: sargramostim Drug: cyclophosphamide Drug: doxorubicin hydrochloride Drug: fludarabine | Number of Participants Who Completed Maintenance Decitabine. Disease-free Survival (DFS) Rate at 1 Year                                                                                                                                                                                                                                                                                                                                                                                                                                                                                                                                                                                                                                                                                                                                                                                                                | Phase 2         | 546 | 15-Nov-06 | 19-Feb-19      |
| G-CSF | NCT00048893 | Vaccine and Chemotherapy for Previously Untreated Metastatic Breast Cancer                                                                     | Terminated             | Breast Neoplasms Metastases, Neoplasm                                                                                                                                                                                                                                                                                                                                                                  | Biological: recombinant fowipox-CEA(6D)/TRICOM vaccine Biological: recombinant vaccinia-CEA(6D)/TRICOM vaccine Biological: filgrastim Biological: sargramostim Drug: cyclophosphamide Drug: doxorubicin hydrochloride Drug: fludarabine                                                                                                                                                                                                                                                                                      | Event-free Survival as Measured by Clinical Evaluation and Tumor Measurements by Imaging Number of Participants With Adverse Events Log Change in Precursor Frequency as Measured by Elispot. Log Change of CD4 CEA-specific Immune Responses and Their Kinetics as a Surrogate Marker for Clinical Anti-tumor Activity of the Vaccines Immune Response to the Vaccine in Those Patients With Late Recovery of Thymic Function Number of Months of Progression Free Survival Number of Participants With an Immune Response as a Result of the Salvage Immunization Schedule Number of                                                                                                                                                                                                                                                                                                                                 | Phase 1 Phase 2 | 37  | Nov-02    | April 13, 2012 |
| G-CSF | NCT00513474 | Rasburicase in Preventing Graft-Versus-Host Disease in Patients With Hematologic Cancer or Other Disease Undergoing Donor Stem Cell Transplant | Completed              | Chronic Myeloproliferative Disorders Graft Versus Host Disease Leukemia Lymphoma Multiple Myeloma and Plasma Cell Neoplasm Myelodysplastic Syndromes Myelodysplastic/Myeloproliferative Neoplasms                                                                                                                                                                                                      | Drug: busulfan Drug: cyclophosphamide Drug: cyclosporin-A Drug: etoposide Drug: methotrexate Drug: rasburicase Drug: sirolimus Drug: tacrolimus Procedure: allogeneic hematopoietic stem cell transplantation Procedure: peripheral blood stem cell transplantation Radiation: total-                                                                                                                                                                                                                                        | Percentage of Participants With Grades II to IV Acute Graft-Versus-Host Disease (aGVHD) Uric Acid Levels Number of Participant With Adverse Events (AE) Graft-versus-host and Host-versus-graft Immune Responses                                                                                                                                                                                                                                                                                                                                                                                                                                                                                                                                                                                                                                                                                                       | Phase 1         | 46  | Jan-08    | 25-May-17      |
| G-CSF | NCT00083551 | UARK 98-026 TT II: Multiple Myeloma Evaluating Anti-Angiogenesis With Thalidomide and Post-Transplant Consolidation Chemotherapy               | Completed              | Multiple Myeloma                                                                                                                                                                                                                                                                                                                                                                                       | Drug: Thalidomide Drug: Ara-C Drug: BCNU Drug: Cisplatin Drug: Cytosar Drug: Dexamethasone Drug: Doxorubicin Drug: Etoposide Drug: Filgrastim Drug: Recombinant GM-CSF Drug: Interferon-alpha-2b Drug: Melphalan Drug: Vincristine                                                                                                                                                                                                                                                                                           | Overall Survival                                                                                                                                                                                                                                                                                                                                                                                                                                                                                                                                                                                                                                                                                                                                                                                                                                                                                                       | Phase 3         | 668 | Aug-98    | 23-Nov-15      |
| G-CSF | NCT00792948 | Combination Chemotherapy With or Without Donor Stem Cell Transplant in Treating Patients With Acute Lymphoblastic Leukemia                     | Active, not recruiting | Acute Lymphoblastic Leukemia Adult B Acute Lymphoblastic Leukemia Adult B Acute Lymphoblastic Leukemia With t(9;22)(q34.1;q11.2); BCR-ABL1 Adult L1 Acute Lymphoblastic Leukemia Adult L2 Acute Lymphoblastic Leukemia Adult T Acute Lymphoblastic Leukemia Recurrent Adult Acute Lymphoblastic Leukemia                                                                                               | Procedure: Allogeneic Hematopoietic Stem Cell Transplantation Drug: Cyclophosphamide Drug: Cytarabine Drug: Dasatinib Drug: Dexamethasone Drug: Doxorubicin Hydrochloride Drug: Etoposide Biological: Filgrastim Other: Laboratory Biomarker Analysis Drug: Leucovorin Calcium Drug: Methotrexate Drug: Methylprednisolone Procedure: Peripheral Blood Stem Cell Transplantation Drug: Prednisone Drug: Sirolimus Drug: Pegfilgrastim                                                                                        | Relapse-free Survival (RFS) After Allogeneic Stem Cell Transplantation Continuous Complete Remission (CCR) Rate                                                                                                                                                                                                                                                                                                                                                                                                                                                                                                                                                                                                                                                                                                                                                                                                        | Phase 2         | 97  | 1-Sep-09  | 29-Jan-20      |
| G-CSF | NCT02087176 | A Placebo Controlled Study Comparing AZD1775+ Docetaxel Versus Placebo+Docetaxel to Treat                                                      | Terminated             | Previously Treated Non Small Cell Lung Cancer                                                                                                                                                                                                                                                                                                                                                          | Drug: AZD1775 Drug: AZD1775 Placebo Drug: Antimitotic Agent Drug: Pegfilgrastim                                                                                                                                                                                                                                                                                                                                                                                                                                              | Objective Response Rate Pharmacokinetic Profile of AZD 1775 in Combination With Docetaxel                                                                                                                                                                                                                                                                                                                                                                                                                                                                                                                                                                                                                                                                                                                                                                                                                              | Phase 2         | 48  | Mar-14    | 14-Jun-16      |
| G-CSF | NCT01355705 | Phase 1-2 Amrubicin in Combo With Lenalidomide + Weekly Dexamethasone in                                                                       | Completed              | Multiple Myeloma                                                                                                                                                                                                                                                                                                                                                                                       | Drug: Amrubicin Drug: Lenalidomide Drug: Dexamethasone Drug: Aspirin Drug: Pegfilgrastim                                                                                                                                                                                                                                                                                                                                                                                                                                     | Response Rates After Amrubicin + Lenalidomide + Dexamethasone, Per International Myeloma Working Group Uniform Response Criteria Duration of Response (DOR) Progression-free Survival (PFS) Time-to-next Treatment                                                                                                                                                                                                                                                                                                                                                                                                                                                                                                                                                                                                                                                                                                     | Phase 1 Phase 2 | 14  | Aug-11    | 18-Sep-18      |
| G-CSF | NCT02013167 | Blinatumomab Versus Standard of Care Chemotherapy in Patients With Relapsed or Refractory Acute Lymphoblastic Leukemia (ALL)                   | Terminated             | Relapsed/Refractory B-precursor Acute Lymphoblastic Leukemia                                                                                                                                                                                                                                                                                                                                           | Drug: Blinatumomab Drug: Standard of Care Chemotherapy                                                                                                                                                                                                                                                                                                                                                                                                                                                                       | Overall Survival Percentage of Participants With Complete Remission Within 12 Weeks of Treatment Initiation Percentage of Participants With Complete Remission/Complete Remission With Partial Hematological Recovery/Complete Remission With Incomplete Hematological Recovery (CR/CRh*/CRi) Within 12 Weeks of Treatment Initiation Event Free Survival (EFS) Duration of Complete Remission Duration of Complete Remission/Complete Remission With Partial Hematological Recovery/Complete Remission With Incomplete Hematological Recovery (CR/CRh*/CRi) Percentage of Participants With Minimal Residual Disease (MRD) Within 12 Weeks of Treatment Initiation Percentage of Participants Who Received an Allogeneic Hematopoietic Stem Cell Transplant (HSCT) Number of Participants With Adverse Events 100-Day Mortality After Allogeneic Hematopoietic Stem Cell Transplant Number of Participants With Anti- | Phase 3         | 405 | 3-Jan-14  | 28-Nov-18      |
| G-CSF | NCT01735175 | Phase III Study Comparing the Efficacy and Safety of LA-EP2006 and Neulasta®                                                                   | Completed              | Neutropenic Complications Breast Neoplasms Chemotherapy-induced Neutropenia Chemotherapeutic Toxicity                                                                                                                                                                                                                                                                                                  | Drug: LA-EP2006 Drug: Neulasta®                                                                                                                                                                                                                                                                                                                                                                                                                                                                                              | Mean Duration of Severe Neutropenia (DSN) During Cycle 1 of Chemotherapy Incidence of Febrile Neutropenia (FN) Number of Patients With at Least One Episode of Fever by Cycle and Across All Cycles Depth of ANC Nadir in Cycle 1 Number of Patients With ANC Nadir Per Day in Cycle 1 Time to ANC Recovery in Days in Cycle 1 Frequency of Infections by Cycle and Across All Cycles Mortality Due to Infection                                                                                                                                                                                                                                                                                                                                                                                                                                                                                                       | Phase 3         | 316 | Jun-12    | 7-Aug-17       |

|       |             |                                                                                                                                                                       |            |                                                                                                                                                                                                                                                                                                                                                                                                                                                                                                                                                                                                                                                                                                                                                                                                                                                                                                                                                                                                                                                                                                                                                                                                                                                              |                                                                                                                                                                                                                                                                                                                                                          |                                                                                                                                                                                                                                                                                                                                                                                                                                                                 |                 |    |            |    |           |
|-------|-------------|-----------------------------------------------------------------------------------------------------------------------------------------------------------------------|------------|--------------------------------------------------------------------------------------------------------------------------------------------------------------------------------------------------------------------------------------------------------------------------------------------------------------------------------------------------------------------------------------------------------------------------------------------------------------------------------------------------------------------------------------------------------------------------------------------------------------------------------------------------------------------------------------------------------------------------------------------------------------------------------------------------------------------------------------------------------------------------------------------------------------------------------------------------------------------------------------------------------------------------------------------------------------------------------------------------------------------------------------------------------------------------------------------------------------------------------------------------------------|----------------------------------------------------------------------------------------------------------------------------------------------------------------------------------------------------------------------------------------------------------------------------------------------------------------------------------------------------------|-----------------------------------------------------------------------------------------------------------------------------------------------------------------------------------------------------------------------------------------------------------------------------------------------------------------------------------------------------------------------------------------------------------------------------------------------------------------|-----------------|----|------------|----|-----------|
| G-CSF | NCT01682044 | Pegfilgrastim and Rituximab in Treating Patients With Untreated, Relapsed, or Refractory Follicular Lymphoma, Small Lymphocytic Lymphoma, or Marginal Zone Lymphoma   | Completed  | Contiguous Stage II Grade 1 Follicular Lymphoma Contiguous Stage II Grade 2 Follicular Lymphoma Contiguous Stage II Grade 3 Follicular Lymphoma Contiguous Stage II Marginal Zone Lymphoma Contiguous Stage II Small Lymphocytic Lymphoma Extranodal Marginal Zone B-cell Lymphoma of Mucosa-associated Lymphoid Tissue Nodal Marginal Zone B-cell Lymphoma Noncontiguous Stage II Grade 1 Follicular Lymphoma Noncontiguous Stage II Grade 2 Follicular Lymphoma Noncontiguous Stage II Grade 3 Follicular Lymphoma Noncontiguous Stage II Marginal Zone Lymphoma Noncontiguous Stage II Small Lymphocytic Lymphoma Recurrent Grade 1 Follicular Lymphoma Recurrent Grade 2 Follicular Lymphoma Recurrent Grade 3 Follicular Lymphoma Recurrent Marginal Zone Lymphoma Recurrent Small Lymphocytic Lymphoma Splenic Marginal Zone Lymphoma Stage I Grade 1 Follicular Lymphoma Stage I Grade 2 Follicular Lymphoma Stage I Grade 3 Follicular Lymphoma Stage I Marginal Zone Lymphoma Stage I Small Lymphocytic Lymphoma Stage III Grade 1 Follicular Lymphoma Stage III Grade 2 Follicular Lymphoma Stage III Grade 3 Follicular Lymphoma Stage III Marginal Zone Lymphoma Stage III Small Lymphocytic Lymphoma Stage IV Grade 1 Follicular Lymphoma Stage | Biological: pegfilgrastim Biological: rituximab Other: flow cytometry Procedure: biopsy Other: immunohistochemistry staining method Genetic: western blotting                                                                                                                                                                                            | Number of Participants With Adverse Events Overall Response Rate Percent Change in Functional and Phenotypic Characteristics of Host Neutrophils From Baseline Percent Change in CD20 Antigen Expression and Density of Expression Percent Change in Serum Levels of Tumor Necrosis Factor (TNF) From Baseline Percent Change in Serum Levels of Interferon Alpha (INF) From Baseline Percent Change in Serum Levels of Free Radical Levels (MF1) From Baseline | Phase 2         | 20 | April 2007 | 17 | 9-Oct-17  |
| G-CSF | NCT00546377 | Pentostatin, Cyclophosphamide, Rituximab, and Mitoxantrone in Treating Patients With Chronic Lymphocytic Leukemia or Other Low-Grade B-Cell Cancer                    | Completed  | Leukemia Lymphoma                                                                                                                                                                                                                                                                                                                                                                                                                                                                                                                                                                                                                                                                                                                                                                                                                                                                                                                                                                                                                                                                                                                                                                                                                                            | Biological: filgrastim Biological: pegfilgrastim Biological: rituximab Biological: sargramostim Drug: cyclophosphamide Drug: mitoxantrone hydrochloride Drug: pentostatin Genetic: fluorescence in situ hybridization Genetic: gene rearrangement analysis Genetic: polymerase chain reaction Genetic: protein expression analysis Other: flow cytometry | Overall Response Maximum Tolerated Dose (MTD) of Mitoxantrone                                                                                                                                                                                                                                                                                                                                                                                                   | Phase 1 Phase 2 | 50 | Jul-05     |    | 12-May-16 |
| G-CSF | NCT00544778 | Combination Chemotherapy and Dexamethasone Followed by Surgery and Radiation Therapy in Treating Patients With Advanced Soft Tissue Sarcoma or Recurrent Bone Sarcoma | Terminated | Sarcoma                                                                                                                                                                                                                                                                                                                                                                                                                                                                                                                                                                                                                                                                                                                                                                                                                                                                                                                                                                                                                                                                                                                                                                                                                                                      | Biological: filgrastim Drug: dexamethasone hydrochloride Drug: doxorubicin hydrochloride Drug: ifosfamide Drug: irinotecan hydrochloride Genetic: protein expression analysis Other: immunoenzyme technique Procedure: adjuvant therapy Procedure: conventional surgery Procedure: neoadjuvant                                                           | Response Rate                                                                                                                                                                                                                                                                                                                                                                                                                                                   | Phase 2         | 7  | Aug-01     |    | 28-Aug-14 |
| G-CSF | NCT00521014 | GM-CSF and Rituximab After Autologous Stem Cell Transplant in Treating Patients With Relapsed or Refractory Follicular Non-Hodgkin Lymphoma                           | Completed  | Lymphoma                                                                                                                                                                                                                                                                                                                                                                                                                                                                                                                                                                                                                                                                                                                                                                                                                                                                                                                                                                                                                                                                                                                                                                                                                                                     | Biological: filgrastim Biological: rituximab Biological: sargramostim Drug: carmustine Drug: cytarabine Drug: etoposide Drug: melphalan Procedure: autologous hematopoietic stem cell                                                                                                                                                                    | Progression-free Survival Rate                                                                                                                                                                                                                                                                                                                                                                                                                                  | Phase 2         | 14 | Oct-07     |    | 22-Dec-15 |
| G-CSF | NCT00387959 | Chemotherapy, Radiation Therapy, Rituximab, and Umbilical Cord Blood Transplant in Treating Patients With B-Cell Non-Hodgkin's Lymphoma                               | Completed  | Leukemia Lymphoma                                                                                                                                                                                                                                                                                                                                                                                                                                                                                                                                                                                                                                                                                                                                                                                                                                                                                                                                                                                                                                                                                                                                                                                                                                            | Biological: filgrastim Biological: rituximab Drug: cyclophosphamide Drug: cyclosporine Drug: fludarabine phosphate Drug: mycophenolate mofetil Procedure: allogeneic hematopoietic stem cell transplantation Procedure: umbilical cord blood                                                                                                             | Survival at 1 Year After Transplantation                                                                                                                                                                                                                                                                                                                                                                                                                        | Phase 2         | 17 | Jul-06     |    | 1-Feb-16  |
| G-CSF | NCT00265889 | Autologous Stem Cell Transplant in Treating Patients With Progressive or Recurrent Hodgkin's Lymphoma                                                                 | Completed  | Lymphoma                                                                                                                                                                                                                                                                                                                                                                                                                                                                                                                                                                                                                                                                                                                                                                                                                                                                                                                                                                                                                                                                                                                                                                                                                                                     | Biological: filgrastim Drug: busulfan Drug: cyclophosphamide Drug: etoposide Drug: melphalan Procedure: autologous-autologous tandem hematopoietic stem cell transplantation Radiation: radiation therapy                                                                                                                                                | Progression-free Survival Response Rate Number of Patients That Experience Pulmonary Toxicity                                                                                                                                                                                                                                                                                                                                                                   | Phase 2         | 42 | Feb-02     |    | 20-Nov-13 |
| G-CSF | NCT00113386 | Cisplatin and Docetaxel With or Without Radiation Therapy in Treating Patients Who Are Undergoing Surgery for Newly Diagnosed Stage III Non-Small Cell                | Terminated | Lung Cancer                                                                                                                                                                                                                                                                                                                                                                                                                                                                                                                                                                                                                                                                                                                                                                                                                                                                                                                                                                                                                                                                                                                                                                                                                                                  | Biological: filgrastim Biological: pegfilgrastim Drug: cisplatin Drug: docetaxel Procedure: adjuvant therapy Procedure: conventional surgery Procedure: neoadjuvant                                                                                                                                                                                      | Comparison of Overall Survival                                                                                                                                                                                                                                                                                                                                                                                                                                  | Phase 3         | 19 | April 2005 |    | 28-Jun-13 |

|       |             |                                                                                                                                                                         |                        |                                                                                                                         |                                                                                                                                                                                                                                                                                                                                                            |                                                                                                                                                                                                                                                                                                                                                                                                                                                                                                                                                                                                                                                                           |         |      |           |           |
|-------|-------------|-------------------------------------------------------------------------------------------------------------------------------------------------------------------------|------------------------|-------------------------------------------------------------------------------------------------------------------------|------------------------------------------------------------------------------------------------------------------------------------------------------------------------------------------------------------------------------------------------------------------------------------------------------------------------------------------------------------|---------------------------------------------------------------------------------------------------------------------------------------------------------------------------------------------------------------------------------------------------------------------------------------------------------------------------------------------------------------------------------------------------------------------------------------------------------------------------------------------------------------------------------------------------------------------------------------------------------------------------------------------------------------------------|---------|------|-----------|-----------|
| G-CSF | NCT00039195 | Chemotherapy and Rituximab With or Without Total-Body Irradiation and Peripheral Stem Cell Transplant in Treating Patients With Lymphoma                                | Completed              | Lymphoma                                                                                                                | Biological: rituximab Drug: cyclophosphamide Drug: ifosfamide Drug: vincristine sulfate Biological: filgrastim Drug: carboplatin Drug: doxorubicin hydrochloride Drug: etoposide Drug: prednisone Drug: vincristine sulfate Procedure: peripheral                                                                                                          | Progression Free Survival                                                                                                                                                                                                                                                                                                                                                                                                                                                                                                                                                                                                                                                 | Phase 2 | 98   | Nov-06    | 10-Aug-16 |
| G-CSF | NCT00002931 | Combination Chemotherapy Plus Peripheral Stem Cell Transplantation in Treating Patients With Relapsed Germ Cell Cancer                                                  | Completed              | Brain and Central Nervous System Tumors Extragenital Germ Cell Tumor Ovarian Cancer Teratoma Testicular Germ Cell Tumor | Biological: filgrastim Drug: carboplatin Drug: etoposide Drug: ifosfamide Drug: paclitaxel Procedure: autologous bone marrow transplantation Procedure: bone marrow ablation with stem cell support                                                                                                                                                        | Progression-free Survival Toxic Effects Overall Survival                                                                                                                                                                                                                                                                                                                                                                                                                                                                                                                                                                                                                  | Phase 2 | 48   | Feb-97    | 23-Feb-17 |
| G-CSF | NCT00425802 | Chemotherapy, Total-Body Irradiation, Rituximab, and Donor Stem Cell Transplant in Treating Patients With B-Cell Non-Hodgkin's Lymphoma or Chronic Lymphocytic Leukemia | Completed              | Leukemia Lymphoma                                                                                                       | Biological: anti-thymocyte globulin Biological: filgrastim Biological: graft-versus-tumor induction therapy Biological: rituximab Drug: cyclophosphamide Drug: cyclosporine Drug: fludarabine phosphate Drug: mycophenolate mofetil Procedure: nonmyeloablative allogeneic hematopoietic stem cell transplantation Radiation: total-body irradiation       | Overall Survival at 1 Year Time to Neutrophil Engraftment Time to Platelet Engraftment Incidence of Moderate to Severe Grades II to IV Graft Versus Host Disease (GVHD) at 100 Days Incidence of Chronic GVHD at 1 Year Immune Reconstruction/CD4+ Count at 3 Months Response to Treatment Immune Reconstruction/CD4+ Count at 6 Months Immune Reconstruction/CD4+ Count at 1 Year                                                                                                                                                                                                                                                                                        | Phase 2 | 61   | 28-Nov-06 | 31-Oct-17 |
| G-CSF | NCT00003270 | Chemotherapy, Radiation Therapy, and Umbilical Cord Blood Transplantation in Treating Patients With Hematologic Cancer                                                  | Completed              | Graft Versus Host Disease Leukemia Lymphoma Multiple Myeloma and Plasma Cell Neoplasm Myelodysplastic Syndromes         | Biological: anti-thymocyte globulin Biological: filgrastim Drug: busulfan Drug: cyclophosphamide Drug: cyclosporine Drug: methylprednisolone Procedure: bone marrow ablation with stem cell support Procedure: umbilical cord blood transplantation Radiation: radiation therapy                                                                           | Overall Response Rate Progression-free Survival                                                                                                                                                                                                                                                                                                                                                                                                                                                                                                                                                                                                                           | Phase 2 | 20   | 4-Sep-97  | 13-Dec-19 |
| G-CSF | NCT00074269 | Allogeneic Stem Cell Transplant After ATG, High-Dose Melphalan, and Fludarabine for Patients With Metastatic Breast Cancer                                              | Terminated             | Breast Cancer                                                                                                           | Biological: anti-thymocyte globulin Biological: filgrastim Biological: graft-versus-tumor induction therapy Biological: therapeutic allogeneic lymphocytes Drug: cyclosporine Drug: fludarabine phosphate Drug: melphalan Drug: methotrexate Procedure:                                                                                                    | Number of Participants With Adverse Events Number of Participants With Long-term Engraftment of Allogeneic Stem Cells and Lymphocytes Number of Participants With Acute and Chronic Graft-versus-host Disease (GVHD) Progression-free Survival Overall Survival Response (Partial and Complete) as Measured at 12 Months Post Allografting Frequency of the Induction of Full Donor Chimerism of Lymphocytes as Measured at 1 Month Post Allografting                                                                                                                                                                                                                     | Phase 2 | 5    | Jul-03    | 31-May-18 |
| G-CSF | NCT00070564 | S0221 Adjuvant Doxorubicin, Cyclophosphamide, and Paclitaxel in Treating Patients With Breast Cancer                                                                    | Active, not recruiting | Breast Cancer                                                                                                           | Biological: pegfilgrastim Drug: AC regimen Drug: cyclophosphamide Drug: doxorubicin hydrochloride Drug: paclitaxel                                                                                                                                                                                                                                         | Disease-free Survival Overall Survival Number of Patients With Gr 3 Through 5 Adverse Events That Are Related to Study Drugs Disease-free Survival Comparison Between 2 Treatments in HR-positive, HER-2 Negative Group Overall Survival Comparison Between 2 Treatments in HR-positive, HER-2 Negative Group Disease-free Survival Comparison Between 2 Treatments in HR-negative, HER-2 Negative Group Overall Survival Comparison Between 2 Treatments in HR-negative, HER-2 Negative Group Disease-free Survival Comparison Between 2 Treatments in HER-2-positive Group Overall Survival                                                                             | Phase 3 | 3294 | Nov-03    | 30-Dec-19 |
| G-CSF | NCT00043979 | Stem Cell Transplantation in Patients With High-Risk and Recurrent Pediatric Sarcomas                                                                                   | Completed              | Sarcoma                                                                                                                 | Drug: F-18 Fluorodeoxyglucose Biological: therapeutic allogeneic lymphocytes Drug: cyclophosphamide Drug: cyclosporine Drug: doxorubicin hydrochloride Drug: etoposide Drug: fludarabine phosphate Drug: melphalan Drug: prednisone Drug: sirolimus Drug: tacrolimus Drug: vincristine sulfate Procedure: peripheral blood stem cell transplantation Drug: | Number of Participants With Engraftment Toxicity Number of Participants With Acute and Chronic GVHD Median Time to Reach Absolute Neutrophil Count of 500/mm(3) Median Time to Reach a Platelet Count of 50,000/mm(3) Early Post Transplantation Release Median Progression Free Survival Two Year Survival Rate for Patients Undergoing Allo-Hematopoietic Stem Cell Transplant Number of Participants to Complete Conversion to >95% Donor Chimerism Cluster of Differentiation 4 (CD4) Reconstitution Best Response Post-Hematopoietic Stem Cell Transplant EPOCH (Etoposide, Vincristine, Cyclophosphamide, and Doxorubicin) Median Survival From Date of Progression | Phase 2 | 60   | 19-Sep-02 | 31-May-17 |

|       |             |                                                                                                                                                                     |            |                                                                                                                                                                                                                                                            |                                                                                                                                                                                                                                                                                                      |                                                                                                                                                                                                                                                                                                                                                                                                                                                                                                                                                                                                                                                                                                                                                                                                                                                                                                                                                                                                                                                                                   |               |     |            |           |
|-------|-------------|---------------------------------------------------------------------------------------------------------------------------------------------------------------------|------------|------------------------------------------------------------------------------------------------------------------------------------------------------------------------------------------------------------------------------------------------------------|------------------------------------------------------------------------------------------------------------------------------------------------------------------------------------------------------------------------------------------------------------------------------------------------------|-----------------------------------------------------------------------------------------------------------------------------------------------------------------------------------------------------------------------------------------------------------------------------------------------------------------------------------------------------------------------------------------------------------------------------------------------------------------------------------------------------------------------------------------------------------------------------------------------------------------------------------------------------------------------------------------------------------------------------------------------------------------------------------------------------------------------------------------------------------------------------------------------------------------------------------------------------------------------------------------------------------------------------------------------------------------------------------|---------------|-----|------------|-----------|
| G-CSF | NCT00365365 | Safety & Efficacy of Three Docetaxel-Based Chemotherapy Regimens Plus Bevacizumab With or Without Trastuzumab for Adjuvant Treatment of Patients With Breast Cancer | Completed  | Breast Cancer                                                                                                                                                                                                                                              | Drug: Doxorubicin and cyclophosphamide (AC) + bevacizumab Drug: Docetaxel (T) + bevacizumab Drug: Docetaxel, doxorubicin, cyclophosphamide (TAC) + bevacizumab Drug: Docetaxel, carboplatin, trastuzumab (TCH) + bevacizumab Drug: Bevacizumab and trastuzumab maintenance therapy Drug: Bevacizumab | Cardiac Safety - Number of Participants With Grade 3-4 Clinical Congestive Heart Failure (CHF) Safety - Number of Participants With Adverse Events (AE) Disease-free Survival (DFS) Rate                                                                                                                                                                                                                                                                                                                                                                                                                                                                                                                                                                                                                                                                                                                                                                                                                                                                                          | Phase 2       | 214 | Aug-06     | 14-Sep-12 |
| G-CSF | NCT00392782 | Donor Stem Cell Transplant in Treating Patients With Myeloid Cancer or Other Disease                                                                                | Terminated | Leukemia Myelodysplastic Syndromes                                                                                                                                                                                                                         | Biological: anti-thymocyte globulin Drug: fludarabine phosphate Drug: thiotepa Procedure: peripheral blood stem cell transplantation Radiation: total-body                                                                                                                                           | Incidence of Disease-free Survival Incidence of Disease Relapse Incidence of Grade II-IV Acute Graft-vs-host Disease (GVHD) Incidence of Chronic Graft-versus-host Disease (GVHD) Incidence of Graft Failure Transplant-related Mortality Overall Survival                                                                                                                                                                                                                                                                                                                                                                                                                                                                                                                                                                                                                                                                                                                                                                                                                        | Phase 2       | 24  | Jul-05     | 28-Dec-17 |
| G-CSF | NCT01557959 | Docetaxel, Cisplatin, Pegfilgrastim, and Erlotinib Hydrochloride in Treating Patients With Stage IIIB or Stage IV Non-Small Cell Lung Cancer                        | Completed  | Adenocarcinoma of the Lung Adenosquamous Cell Lung Cancer Bronchoalveolar Cell Lung Cancer Large Cell Lung Cancer Non-small Cell Lung Cancer Recurrent Non-small Cell Lung Cancer Squamous Cell Lung Cancer Stage IIIB Non-small Cell Lung Cancer Stage IV | Drug: cisplatin Biological: pegfilgrastim Drug: erlotinib hydrochloride Other: laboratory biomarker analysis Genetic: polymorphism analysis Other: pharmacogenomic                                                                                                                                   | Time to Progression Response Rate Among Subgroups of Patients According to Molecular Profiles Including Tumor Characteristics and Genetic Polymorphisms From Peripheral Blood Median Survival Among Subgroups of Patients According to Molecular Profiles Including Tumor Characteristics and Genetic Polymorphisms From Peripheral Blood                                                                                                                                                                                                                                                                                                                                                                                                                                                                                                                                                                                                                                                                                                                                         | Phase 2       | 45  | Jul-07     | 29-Jun-18 |
| G-CSF | NCT00679029 | Combination Chemotherapy and Bevacizumab in Treating Women With HER2/Neu-Negative Stage II or Stage III Breast Cancer                                               | Terminated | HER2-negative Breast Cancer Stage II Breast Cancer Stage IIIA Breast Cancer Stage IIIB Breast Cancer Stage IIIC Breast Cancer                                                                                                                              | Drug: doxorubicin hydrochloride Drug: cyclophosphamide Biological: bevacizumab Drug: paclitaxel Drug: gemcitabine hydrochloride Other: laboratory biomarker analysis Biological: pegfilgrastim                                                                                                       | Percentage of Participants With Study Drug-associated Adverse Events Leading to Dose Holds or Reductions Count of Participants With Related SAEs by NCI Common Toxicity Criteria v3.0 Disease-free Survival as Assessed by the Kaplan and Meier Method Overall Survival as Assessed by the Kaplan and Meier Method                                                                                                                                                                                                                                                                                                                                                                                                                                                                                                                                                                                                                                                                                                                                                                | Phase 2       | 15  | May-08     | 12-Dec-18 |
| G-CSF | NCT00820976 | Induction With or Without Granulocyte Colony-Stimulating Factor in AML Transplantation in                                                                           | Completed  | AML                                                                                                                                                                                                                                                        | Drug: G-CSF                                                                                                                                                                                                                                                                                          | response to induction overall survival                                                                                                                                                                                                                                                                                                                                                                                                                                                                                                                                                                                                                                                                                                                                                                                                                                                                                                                                                                                                                                            | Phase 3       | 260 | Mar-96     | 12-Jan-09 |
| G-CSF | NCT01171092 | A Safety Study Looking at the Combination of Velcade and G-CSF in Patients With Myeloma or                                                                          | Completed  | Malignant Lymphoma, Stem Cell Type Autologous Transplant                                                                                                                                                                                                   | Drug: bortezomib and G-CSF                                                                                                                                                                                                                                                                           | Determine the effectiveness of the combination of bortezomib and G-CSF Assess the safety of the combination of bortezomib and G-CSF                                                                                                                                                                                                                                                                                                                                                                                                                                                                                                                                                                                                                                                                                                                                                                                                                                                                                                                                               | Early Phase 1 | 21  | Sep-10     | 11-Jan-17 |
| G-CSF | NCT02220608 | Phase I Study of Bortezomib With G-CSF for Stem Cell Mobilization in Patients With Multiple Myeloma                                                                 | Completed  | Multiple Myeloma                                                                                                                                                                                                                                           | Biological: Bortezomib Drug: G-CSF                                                                                                                                                                                                                                                                   | Maximum tolerated dose (MTD) of bortezomib when given with G-CSF                                                                                                                                                                                                                                                                                                                                                                                                                                                                                                                                                                                                                                                                                                                                                                                                                                                                                                                                                                                                                  | Phase 1       | 10  | 20-Feb-15  | 8-Jan-18  |
| G-CSF | NCT01908621 | Randomized Trial of G-CSF Alone Versus Intermediate-dose Ara-C Plus G-CSF Mobilization in Multiple Myeloma Patients.                                                | Completed  | Multiple Myeloma                                                                                                                                                                                                                                           | Drug: G-CSF (filgrastim) Drug: Cytosine arabinoside + G-CSF (filgrastim)                                                                                                                                                                                                                             | The proportion of patients with stem cell yield at least $5 \times 10^6$ CD34+ cells/kg in each treatment arm. Peak level of CD34+ cells in peripheral blood ( $/\mu$ l). Total number of harvested CD34+ cells/kg. Number of leukaphereses needed to harvest target amount of stem cells. The proportion of hematologic and non-hematologic complications. Duration of neutropenia $< 0.5 \times 10^9/L$ and thrombocytopenia $< 50 \times 10^9/L$ . Number of blood transfusions needed and number of days of antibiotics therapy. Duration of hospital stay. Time of neutrophil and platelet engraftment after autologous stem cell transplantation.                                                                                                                                                                                                                                                                                                                                                                                                                           | Phase 3       | 90  | 20-Mar-13  | 28-Aug-18 |
| G-CSF | NCT00943943 | Granulocyte-colony Stimulating Factor (G-CSF) and Plerixafor Plus Sorafenib for Acute Myelogenous Leukemia (AML) With FLT3                                          | Completed  | Acute Myelogenous Leukemia Leukemia                                                                                                                                                                                                                        | Drug: G-CSF Drug: Plerixafor Drug: Sorafenib                                                                                                                                                                                                                                                         | Maximum Tolerated Dose (MTD) of Sorafenib                                                                                                                                                                                                                                                                                                                                                                                                                                                                                                                                                                                                                                                                                                                                                                                                                                                                                                                                                                                                                                         | Phase 1       | 33  | 29-Oct-10  | 29-Mar-17 |
| G-CSF | NCT01767714 | Evaluation of Plerixafor Plus G-CSF to Mobilize and Collect $5 \times 10^6$ CD34+ Cells/kg in Non-Hodgkin's Lymphoma (NHL) Patients for Autologous Transplantation  | Completed  | Non-Hodgkin's Lymphoma                                                                                                                                                                                                                                     | Drug: Granulocyte-colony stimulating factor (G-CSF) Drug: Plerixafor Drug: Placebo                                                                                                                                                                                                                   | Number of patients who meet the target of $\geq 5 \times 10^6$ CD34+ cells/kg in 4 or fewer days of apheresis Number of patients who achieve $\geq 2 \times 10^6$ CD34+ cells/kg within 4 or fewer days of apheresis Number of days of apheresis to collect $\geq 2 \times 10^6$ CD34+ cells/kg Number of days of apheresis to collect $\geq 5 \times 10^6$ CD34+ cells/kg Total number of CD34+ cells collected Time from transplantation to neutrophil and platelet (PLT) engraftment Number of treatment-emergent adverse events (TEAEs) and serious adverse events (SAEs) Maximum plasma concentration (Cmax) Time to reach Cmax (Tmax) Area Under the Curve 0 to 10 hours post-dose (AUC0-10) Area Under the Curve 0 to last observed concentration (AUClast) Area Under the Curve (AUC) Percentage of extrapolation of AUC (AUCext) Half life (T1/2) Volume of distribution (Vz/F) Total body clearance (CL/F) Peripheral blood CD34+ cell counts (Pharmacodynamic analysis) The fold-increase in the number of circulating CD34+ following the first dose of plerixafor or | Phase 3       | 100 | April 2013 | 9-Dec-14  |
| G-CSF | NCT02816164 | A Study to Compare Administration Schedules of G-CSF (Filgrastim) for Primary Prophylaxis of Febrile Neutropenia                                                    | Completed  | Early Stage Breast Cancer                                                                                                                                                                                                                                  | Drug: Neupogen                                                                                                                                                                                                                                                                                       | Febrile neutropenia Treatment-related hospitalization Chemotherapy dose delay Chemotherapy dose reduction Chemotherapy discontinuation                                                                                                                                                                                                                                                                                                                                                                                                                                                                                                                                                                                                                                                                                                                                                                                                                                                                                                                                            | Phase 4       | 324 | Sep-16     | 6-Sep-19  |
| G-CSF | NCT01403896 | Healthy Donor Study II - Comparing Plerixafor With G-CSF and Plerixafor                                                                                             | Completed  | Malignant Lymphoma, Stem Cell Type                                                                                                                                                                                                                         | Drug: Plerixafor (Mozobil) Drug: Plerixafor + G-CSF                                                                                                                                                                                                                                                  | The frequency of CD34+ and CD34+CD38- cells at different time points as compared to baseline. The frequency of CD56bright NK cells, CD4+ central memory T-cells, perforin+ CD8+ T-cells and CD19+ CD27-TLR9+ B-cells at different time points as compared to baseline. The frequency of CD56bright NK cells at different time points as compared to                                                                                                                                                                                                                                                                                                                                                                                                                                                                                                                                                                                                                                                                                                                               | Phase 2       | 10  | April 2012 | 2-Aug-17  |

|       |             |                                                                                                                                                                                                                     |           |                                                                                              |                                                                                     |                                                                                                                                                                                                                                                                                                                                                                                                                                                                                                                                                                                                                                                                                                                                                                                                                                                                                                    |                |     |          |           |
|-------|-------------|---------------------------------------------------------------------------------------------------------------------------------------------------------------------------------------------------------------------|-----------|----------------------------------------------------------------------------------------------|-------------------------------------------------------------------------------------|----------------------------------------------------------------------------------------------------------------------------------------------------------------------------------------------------------------------------------------------------------------------------------------------------------------------------------------------------------------------------------------------------------------------------------------------------------------------------------------------------------------------------------------------------------------------------------------------------------------------------------------------------------------------------------------------------------------------------------------------------------------------------------------------------------------------------------------------------------------------------------------------------|----------------|-----|----------|-----------|
| G-CSF | NCT01919710 | Safety and Efficacy Studies of rHSA/G-CSF Fusion Protein For Injection to Treat Neutropenia                                                                                                                         | Completed | Underdose (Unintentional) Cancer Tumor                                                       | Drug: rHSA/G-CSF                                                                    | Number of adverse events AUC                                                                                                                                                                                                                                                                                                                                                                                                                                                                                                                                                                                                                                                                                                                                                                                                                                                                       | Phase 1        | 29  | Oct-12   | 3-Jun-15  |
| G-CSF | NCT00665314 | Evaluation of the Safety and Efficacy of the Addition of AMD3100 to a G-CSF Mobilization Regimen in Patients With Lymphoma (NHL and HD) and Multiple Myeloma (MM).                                                  | Completed | Lymphoma Non Hodgkin's Lymphoma Hodgkin's Disease Multiple Myeloma                           | Drug: Plerixafor (AMD3100) Drug: Can be any registered nonpegylated form of G-CSF   | To determine if patients reach a target of $\geq 2 \times 10^6$ CD34+ cells/kg within 2 days of apheresis in Non-Hodgkin's Lymphoma (NHL), Hodgkin's Disease (HD) or Multiple Myeloma (MM) patients who are proven poor mobilizer. To examine and compare the safety of both mobilization regimens, G-CSF plus AMD3100(240µg/kg) and G-CSF plus placebo in NHL, MM and HD patients. To measure the daily and total number of CD34+ cells harvested during apheresis. To measure the number of days of apheresis needed to harvest $\geq 2 \times 10^6$ CD34+ cells/kg. To measure the number of days of apheresis needed to harvest $\geq 5 \times 10^6$ CD34+ cells/kg. To determine the times of platelet (PLT) and polymorphonuclear leukocyte (PMN) engraftment. To evaluate the durability of engraftment. To determine if patient reach the Optimum Target of $5 \times 10^6$ CD34+ cells/kg | Phase 2        | 5   | Nov-07   | 11-Feb-14 |
| G-CSF | NCT01753453 | An Exploratory Safety Study to Investigate the Extent of Tumor Cell Mobilization (TCM) After Use of G-CSF Alone or G-CSF Plus Plerixafor in Multiple Myeloma (MM) Patients Who May be Poor Mobilizers of Stem Cells | Completed | Multiple Myeloma                                                                             | Drug: Plerixafor Drug: Granulocyte-colony stimulating factor (G-CSF)                | The presence of myeloma tumor cells as measured by the percentage of myeloma tumor cells/CD34+ cells The presence of myeloma tumor cells as measured by the percentage of myeloma tumor cells/pleixafor cumulative dose/kg body weights The presence of myeloma tumor cells as measured by the percentage of myeloma tumor cells/G-CSF cumulative dose/kg body weight The change in tumor cell mobilization(TCM) in the peripheral blood The number of myeloma tumor cells per patient at each apheresis The number of patients who mobilize at least $4.5 \times 10^5$ myeloma tumor cells/kg body weight as measured in each apheresis product CD34+ stem cell yield in the apheresis product The                                                                                                                                                                                                | Phase 2        | 23  | Jun-13   | 7-Oct-16  |
| G-CSF | NCT02221479 | Plerixafor Plus Granulocyte Colony-stimulating Factor (G-CSF) For Mobilization And Collection Of Peripheral Hematopoietic Stem Cells In Japanese Participants With Multiple Myeloma                                 | Completed | Multiple Myeloma                                                                             | Drug: plerixafor GZ316455 Drug: Filgrastim                                          | Proportion of participants who achieve a collection of greater than or equal to $6 \times 10^6$ cells/kg CD34+ cells in less than or equal to 2 days of apheresis Proportion of participants who achieve a collection of a minimum target of $2 \times 10^6$ cells/kg CD34+ cells in less than or equal to 4 days of apheresis Number of days of apheresis to collect $6 \times 10^6$ cells/kg CD34+ cells Number of days of apheresis to collect $2 \times 10^6$ cells/kg CD34+ cells Total number of CD34+ cells/kg collected over up to 4 apheresis The relative increase (ratio) of peripheral blood CD34+ cell count (cells/ul ) Number of participants with adverse                                                                                                                                                                                                                          | Phase 2        | 14  | Oct-14   | 4-Aug-15  |
| G-CSF | NCT02841722 | Evaluation and Modeling of the G-CSF Effect on the Evolution of Neutrophils During Chemotherapy                                                                                                                     | Completed | Breast Cancer                                                                                | Procedure: ERIBULIN + G-CSF (Granulocyte-Colony Stimulating Factor)                 | Variation of Neutrophils concentration in patient treated with G-CSF (Granulocyte-Colony Stimulating Factor)                                                                                                                                                                                                                                                                                                                                                                                                                                                                                                                                                                                                                                                                                                                                                                                       | Not Applicable | 95  | 3-Dec-15 | 27-Jan-20 |
| G-CSF | NCT00400556 | ATRA Plus G-CSF for Mobilization of Hematopoietic Stem and Progenitor Cells                                                                                                                                         | Completed | Multiple Myeloma Cutaneous Lymphoma                                                          | Drug: ATRA plus G-CSF (filgrastim, NEUPOGEN (R)) combination                        | Toxicity data (NCI-CTC version 2.0 criteria) skin toxicity hepatotoxicity mucosal toxicity hematologic toxicity neurologic toxicity treatment response CD34+ cell count peak level time to CD34+ count peak level time to reach level $>5 \times 10^6$ L area under curve for duration of time spent with CD34+ count $>5 \times 10^6$ L peripheral blood colony forming unit assays peak CFU-GEMM level time to peak CFU-GEMM level                                                                                                                                                                                                                                                                                                                                                                                                                                                               | Phase 1        | 6   | Mar-05   | 17-Nov-06 |
| G-CSF | NCT01331590 | Disrupting the Bone Marrow Microenvironment With G-CSF in Acute Lymphoblastic Leukemia                                                                                                                              | Completed | Precursor Cell Lymphoblastic Leukemia-Lymphoma                                               | Drug: G-CSF Drug: Ifosfamide Drug: Etoposide Drug: Dexamethasone Drug: Mesna        | Treatment-related mortality Delayed hematologic recovery Complete remission rate cytogenetic complete remission Overall survival Disease-free survival Remission duration Frequency and severity of adverse events Interaction of pretreatment disease                                                                                                                                                                                                                                                                                                                                                                                                                                                                                                                                                                                                                                             | Early Phase 1  | 13  | Jul-11   | 20-Sep-16 |
| G-CSF | NCT00771433 | G-CSF in Preventing Neutropenia in Women Receiving Chemotherapy for Breast Cancer                                                                                                                                   | Completed | Breast Cancer Chemotherapeutic Agent Toxicity Neutropenia                                    | Biological: filgrastim                                                              | Occurrence of febrile neutropenia                                                                                                                                                                                                                                                                                                                                                                                                                                                                                                                                                                                                                                                                                                                                                                                                                                                                  | Phase 2        | 120 | Oct-07   | 13-May-11 |
| G-CSF | NCT00770172 | G-CSF in Preventing Neutropenia in Patients With Solid Tumors Who Are Receiving Chemotherapy                                                                                                                        | Completed | Chemotherapeutic Agent Toxicity Neutropenia Unspecified Adult Solid Tumor, Protocol Specific | Biological: filgrastim                                                              | Number of courses of G-CSF required                                                                                                                                                                                                                                                                                                                                                                                                                                                                                                                                                                                                                                                                                                                                                                                                                                                                | Phase 3        | 140 | Oct-07   | 13-May-11 |
| G-CSF | NCT01285219 | A Study Comparing Pegylated Filgrastim and Filgrastim in Support for Chemotherapy                                                                                                                                   | Completed | Cancer                                                                                       | Drug: pegylated filgrastim and filgrastim Drug: filgrastim and pegylated filgrastim | Protective rate of grade 4 neutropenia rate of grade 3/4 neutropenia time to neutrophil recovery incidence of antibiotic administration ANC profile incidence and severity adverse events incidence and severity of side effects changes in clinical laboratory values incidence of febrile neutropenia                                                                                                                                                                                                                                                                                                                                                                                                                                                                                                                                                                                            | Phase 3        | 337 | Jan-06   | 27-Jan-11 |
| G-CSF | NCT00616213 | PR104 and G-CSF in Treating Patients With Solid Tumors                                                                                                                                                              | Completed | Unspecified Adult Solid Tumor, Protocol Specific                                             | Biological: filgrastim Drug: PR104 Other: F-18-fluoromisonidazole                   | Maximum tolerated dose of PR-104 Safety profile using CTCAE v3 criteria Dose-limiting toxicity of PR-104 Pharmacokinetics of PR-104 and its alcohol metabolite in blood Anti-tumor activity Biomarkers of tumor hypoxia                                                                                                                                                                                                                                                                                                                                                                                                                                                                                                                                                                                                                                                                            | Phase 1        | 5   | Feb-08   | 1-Jun-11  |

|       |             |                                                                                                                                                                                 |           |                                                                                                                                                                                                                                                                                                                                                                                                                                                                                                                                                                                                                                                                                                                                                                                                                                                       |                                                                                                                                                           |                                                                                                                                                                                                                                                                                                                                                                                                                                                                                                                                                                                                                                                                                                                                                                                                                                                                                                                                                     |                 |     |          |           |
|-------|-------------|---------------------------------------------------------------------------------------------------------------------------------------------------------------------------------|-----------|-------------------------------------------------------------------------------------------------------------------------------------------------------------------------------------------------------------------------------------------------------------------------------------------------------------------------------------------------------------------------------------------------------------------------------------------------------------------------------------------------------------------------------------------------------------------------------------------------------------------------------------------------------------------------------------------------------------------------------------------------------------------------------------------------------------------------------------------------------|-----------------------------------------------------------------------------------------------------------------------------------------------------------|-----------------------------------------------------------------------------------------------------------------------------------------------------------------------------------------------------------------------------------------------------------------------------------------------------------------------------------------------------------------------------------------------------------------------------------------------------------------------------------------------------------------------------------------------------------------------------------------------------------------------------------------------------------------------------------------------------------------------------------------------------------------------------------------------------------------------------------------------------------------------------------------------------------------------------------------------------|-----------------|-----|----------|-----------|
| G-CSF | NCT01031368 | Clofarabine, Cytarabine, and Filgrastim Followed by Infusion of Non-HLA Matched Ex Vivo Expanded Cord Blood Progenitors in Treating Patients With Acute Myeloid Leukemia        | Completed | Adult Acute Megakaryoblastic Leukemia (M7) Adult Acute Minimally Differentiated Myeloid Leukemia (M0) Adult Acute Monoblastic Leukemia (M5a) Adult Acute Monocytic Leukemia (M5b) Adult Acute Myeloblastic Leukemia With Maturation (M2) Adult Acute Myeloblastic Leukemia Without Maturation (M1) Adult Acute Myeloid Leukemia With 11q23 (MLL) Abnormalities Adult Acute Myeloid Leukemia With Del(5q) Adult Acute Myeloid Leukemia With Inv(16)(p13;q22) Adult Acute Myeloid Leukemia With t(15;17)(q22;q12) Adult Acute Myeloid Leukemia With t(16;16)(p13;q22) Adult Acute Myeloid Leukemia With t(8;21)(q22;q22) Adult Acute Myelomonocytic Leukemia (M4) Adult Acute Promyelocytic Leukemia (M3) Adult Erythroleukemia (M6a) Adult Pure Erythroid Leukemia (M6b) Recurrent Adult Acute Myeloid Leukemia Untreated Adult Acute Myeloid Leukemia | Drug: cytarabine Drug: clofarabine Drug: filgrastim Biological: Ex-vivo expanded cord blood progenitor cell infusion Other: laboratory biomarker analysis | Grade 3 or greater infusion toxicity, as defined by the National Cancer Institute (NCI) Common Terminology Criteria for Adverse Events (CTCAE) version 3.0 Treatment-related mortality Platelet refractoriness in the presence of alloimmunization Exacerbation of chemotherapy-related toxicity, as defined by NCI CTCAE version 3.0 Delayed marrow recovery (in the absence of relapse) when expanded cord blood progenitors are infused, defined as failure to achieve neutrophil recovery (ANC less than 500) post treatment with marrow cellularity and marrow blast count less than 5%                                                                                                                                                                                                                                                                                                                                                        | Phase 1         | 29  | Dec-09   | 1-Mar-19  |
| G-CSF | NCT01899326 | Desipramine Hydrochloride and Filgrastim For Stem Cell Mobilization in Patients With Multiple Myeloma Undergoing Stem Cell Transplant                                           | Completed | DS Stage I Plasma Cell Myeloma DS Stage II Plasma Cell Myeloma DS Stage III Plasma Cell Myeloma Refractory Plasma Cell Myeloma                                                                                                                                                                                                                                                                                                                                                                                                                                                                                                                                                                                                                                                                                                                        | Drug: Desipramine Hydrochloride Biological: Filgrastim Other: Laboratory Biomarker Analysis                                                               | Success rate of stem cell mobilization (SCM) using filgrastim and desipramine to collect > 5 x 10 <sup>6</sup> cluster of differentiation (CD)34/kg in patients with multiple myeloma (MM) who are first time mobilizers or unexposed to alkylating agents Success rate of SCM using filgrastim and desipramine to achieve a total collection of > 5 x 10 <sup>6</sup> CD34/kg in patients with MM who failed prior mobilization or were exposed to alkylator therapy or are predicted to be difficult to mobilize Average number of days of apheresis required to collect > 5 x 10 <sup>6</sup> CD34+ cells/kg Incidence of adverse events graded by the National Cancer Institute Common Terminology Criteria for Adverse Events version 4 Time to neutrophil engraftment: first of three consecutive days with absolute neutrophil count (ANC) > 500/uL or first day with ANC > 1000/uL in the absence of growth factor support Time to platelet | Not Applicable  | 9   | Dec-12   | 12-Dec-19 |
| G-CSF | NCT02221492 | Plerixafor Plus Granulocyte Colony-Stimulating Factor For Mobilization And Collection Of Peripheral Hematopoietic Stem Cells In Japanese Participants With Non-Hodgkin Lymphoma | Completed | Lymphoma                                                                                                                                                                                                                                                                                                                                                                                                                                                                                                                                                                                                                                                                                                                                                                                                                                              | Drug: plerixafor GZ316455 Drug: Filgrastim                                                                                                                | Proportion of participants who achieve a collection of greater than or equal to 5 x 10 <sup>6</sup> cells/kg CD34+ cells in less than or equal to 4 days of apheresis Proportion of participants who achieve a collection of a minimum target of 2 x 10 <sup>6</sup> cells/kg CD34+ cells in less than or equal to 4 days of apheresis Number of days of apheresis to collect 5 x 10 <sup>6</sup> cells/kg CD34+ cells Number of days of apheresis to collect 2 x 10 <sup>6</sup> cells/kg CD34+ cells Total number of CD34+ cells/kg collected over up to 4 apheresis The relative increase (ratio) of peripheral blood (PB) CD34+ cell count (cells/μL) Number of participants with adverse events Change from baseline in clinical laboratory measurements                                                                                                                                                                                       | Phase 2         | 32  | Nov-14   | 30-Mar-16 |
| G-CSF | NCT00773149 | Alemtuzumab (CAMPATH 1H) Associated to G-CSF in Adult Patients With Refractory Acute Lymphocytic Leukemia                                                                       | Completed | Acute Lymphocytic Leukemia                                                                                                                                                                                                                                                                                                                                                                                                                                                                                                                                                                                                                                                                                                                                                                                                                            | Drug: Alemtuzumab (CAMPATH 1H) associated to G-CSF                                                                                                        | Partial and complete remission, overall response rates Valuation of tolerance, more particularly targeted at the immunodeficiency shortage, contagious complications and neurotoxicity assessed according to the NCI (National Cancer Institute) classification. Valuation of the response waiting time, from the first day of the induction treatment to the REEVOLUTING.                                                                                                                                                                                                                                                                                                                                                                                                                                                                                                                                                                          | Phase 1 Phase 2 | 12  | Oct-06   | 26-Jul-12 |
| G-CSF | NCT00541125 | G-CSF in Preventing Neutropenia During First-Line Treatment With Chemotherapy and Bevacizumab in Patients With Metastatic Colorectal                                            | Completed | Colorectal Cancer                                                                                                                                                                                                                                                                                                                                                                                                                                                                                                                                                                                                                                                                                                                                                                                                                                     | Biological: bevacizumab Biological: filgrastim Drug: fluorouracil Drug: irinotecan hydrochloride Drug: leucovorin calcium                                 | Rate of neutropenia grade 4 or fever Toxicities by NCI-CTC v. 2.0 Objective response at 6 months by RECIST Tolerance (except neutropenia) by NCI-CTC v. 2.0 Progression-free survival Overall survival Time to treatment failure                                                                                                                                                                                                                                                                                                                                                                                                                                                                                                                                                                                                                                                                                                                    | Phase 2         | 20  | Nov-07   | 30-May-16 |
| G-CSF | NCT00274794 | VP and G-CSF With or Without Rituximab in Autologous Peripheral Stem Cell Transplant For NHL                                                                                    | Completed | Lymphoma                                                                                                                                                                                                                                                                                                                                                                                                                                                                                                                                                                                                                                                                                                                                                                                                                                              | Biological: filgrastim Biological: rituximab                                                                                                              | Correlate CD34+ cell yields with the addition of rituximab Acute toxicity of rituximab, etoposide, and filgrastim (G-CSF)                                                                                                                                                                                                                                                                                                                                                                                                                                                                                                                                                                                                                                                                                                                                                                                                                           | Not Applicable  | 55  | Feb-00   | 29-Mar-11 |
| G-CSF | NCT00497809 | Safety and Efficacy Study of G-CSF Therapy to Treat Patients at High Risk for Chemotherapy Induced Severe Neutropenia                                                           | Completed | Breast Cancer Neutropenia                                                                                                                                                                                                                                                                                                                                                                                                                                                                                                                                                                                                                                                                                                                                                                                                                             | Drug: AVI-014 versus Filgrastim                                                                                                                           | The primary efficacy endpoint is duration of grade 4 neutropenia (DSN), defined as ANC <0.5 x 10 <sup>9</sup> /L during chemotherapy cycle 1. • Incidence of grade 4 neutropenia • Duration of neutropenia (defined as the number of days with ANC <0.5 x 10 <sup>9</sup> /L and <0.1 x 10 <sup>9</sup> /L)                                                                                                                                                                                                                                                                                                                                                                                                                                                                                                                                                                                                                                         | Phase 2         | 189 | Aug-07   | 3-May-11  |
| G-CSF | NCT02173262 | REaCT Integrated Consent Model to Compare Two Standard of Care                                                                                                                  | Completed | Breast Cancer                                                                                                                                                                                                                                                                                                                                                                                                                                                                                                                                                                                                                                                                                                                                                                                                                                         | Drug: G-CSF Drug: Ciprofloxacin                                                                                                                           | The percentage of randomized patients in each physician's practice rates of febrile neutropenia                                                                                                                                                                                                                                                                                                                                                                                                                                                                                                                                                                                                                                                                                                                                                                                                                                                     | Phase 4         | 142 | Aug-14   | 6-Nov-17  |
| G-CSF | NCT03323541 | Use of Zarzio® in Post-autologous Stem Cell Transplantation Procedure                                                                                                           | Completed | Multiple Myeloma Non-hodgkin Lymphoma Hodgkin Lymphoma                                                                                                                                                                                                                                                                                                                                                                                                                                                                                                                                                                                                                                                                                                                                                                                                | Drug: Filgrastim Prefilled Syringe [Zarzio®]                                                                                                              | time to bone marrow recovery                                                                                                                                                                                                                                                                                                                                                                                                                                                                                                                                                                                                                                                                                                                                                                                                                                                                                                                        |                 | 62  | 3-Nov-16 | 21-Sep-18 |
| G-CSF | NCT00031629 | Combination Chemotherapy and Filgrastim or Pegfilgrastim in Treating Patients With Recurrent or Persistent Cancer of the Uterus                                                 | Completed | Recurrent Uterine Corpus Sarcoma Uterine Corpus Leiomyosarcoma                                                                                                                                                                                                                                                                                                                                                                                                                                                                                                                                                                                                                                                                                                                                                                                        | Drug: Docetaxel Biological: Filgrastim Drug: Gemcitabine Hydrochloride Biological: Pegfilgrastim                                                          | Frequency and duration of objective response Frequency of severity of observed adverse effects assessed using CTC version 2.0                                                                                                                                                                                                                                                                                                                                                                                                                                                                                                                                                                                                                                                                                                                                                                                                                       | Phase 2         | 51  | Jan-05   | 8-Dec-16  |



|       |             |                                                                                                                                                                                           |           |                                                           |                                                                                                           |                                                                                                                                                                                                                                                                                                                                                                                                                                                                                                                                                                                                                                                                                                                                                                                                                                                                                                                                                                                                                                                                                                                                                                                                                                                                                                                                                                                                                                                                               |         |     |           |           |
|-------|-------------|-------------------------------------------------------------------------------------------------------------------------------------------------------------------------------------------|-----------|-----------------------------------------------------------|-----------------------------------------------------------------------------------------------------------|-------------------------------------------------------------------------------------------------------------------------------------------------------------------------------------------------------------------------------------------------------------------------------------------------------------------------------------------------------------------------------------------------------------------------------------------------------------------------------------------------------------------------------------------------------------------------------------------------------------------------------------------------------------------------------------------------------------------------------------------------------------------------------------------------------------------------------------------------------------------------------------------------------------------------------------------------------------------------------------------------------------------------------------------------------------------------------------------------------------------------------------------------------------------------------------------------------------------------------------------------------------------------------------------------------------------------------------------------------------------------------------------------------------------------------------------------------------------------------|---------|-----|-----------|-----------|
| G-CSF | NCT01107756 | A Clinical Trial of Patients With Solid Tumours Receiving Granulocyte Colony Stimulating Factor as Primary Prophylaxis for Chemotherapy-induced Neutropenia, in a Docetaxel Based Regimen | Completed | Neoplasms (no Otherwise Specified)                        | Drug: LENOGRASTIM (GRANOYTE 34)                                                                           | Incidence and severity of neutropenia assessed by using the Common Terminology Criteria for Adverse Events (CTCAE) version 4. Incidence and severity of febrile neutropenia assessed by using the Common Terminology Criteria for Adverse Events (CTCAE) version 4. Incidence and severity of anaemia assessed by using the Common Terminology Criteria for Adverse Events (CTCAE) version 4. Incidence and severity of asthenia assessed by using the Common Terminology Criteria for Adverse Events (CTCAE) version 4. Incidence and severity of anorexia assessed by using the Common Terminology Criteria for Adverse Events (CTCAE) version 4. Incidence and severity of myalgia assessed by using the Common Terminology Criteria for Adverse Events (CTCAE) version 4. Incidence and severity of nails changes, including nail disorders assessed by using the Common Terminology Criteria for Adverse Events (CTCAE) version 4. Incidence and severity of oral mucositis assessed by using the Common Terminology Criteria for Adverse Events (CTCAE) version 4. Neutropenia/febrile neutropenia associated days in hospital. Neutropenia/febrile neutropenia associated use of anti-infectives. Incidence of chemotherapy dose reduction, withdrawals or treatment delays due to neutropenia or febrile neutropenia. Infection with (or without) neutropenia. Relationship between the incidence and severity of neutropenia and the different chemotherapy regimens | Phase 4 | 403 | Mar-10    | 5-Oct-12  |
| G-CSF | NCT00741325 | Long-Term Follow-up Study for Non-Hodgkin's Lymphoma Patients Who Received Study Treatment (Plerixafor or Placebo) in the AMD3100-3101 Study (NCT00103610).                               | Completed | Non-Hodgkin's Lymphoma Autologous Transplantation         | Drug: granulocyte colony-stimulating factor (G-CSF) Drug: plerixafor Drug: Placebo                        | Progression-free survival and overall survival of patients treated with at least 1 dose of study treatment (placebo or plerixafor) in protocol AMD3100-3101 (NCT00103610).                                                                                                                                                                                                                                                                                                                                                                                                                                                                                                                                                                                                                                                                                                                                                                                                                                                                                                                                                                                                                                                                                                                                                                                                                                                                                                    |         | 178 | Jun-06    | 11-Feb-14 |
| G-CSF | NCT00741780 | Long-Term Follow-up Study for Multiple Myeloma Patients Who Received Study Treatment (Plerixafor or Placebo) in the                                                                       | Completed | Multiple Myeloma Autologous Transplantation               | Drug: Placebo Drug: plerixafor Drug: granulocyte colony-stimulating factor (G-CSF)                        | Progression-free survival and overall survival of patients treated with at least 1 dose of study treatment (placebo or plerixafor) in protocol AMD3100-3102 (NCT00103662)                                                                                                                                                                                                                                                                                                                                                                                                                                                                                                                                                                                                                                                                                                                                                                                                                                                                                                                                                                                                                                                                                                                                                                                                                                                                                                     |         | 164 | Jun-06    | 24-Mar-15 |
| G-CSF | NCT00194753 | Adjuvant Therapy for High-Risk Breast Cancer With Wkly Adriamycin & Oral Cytoxan With G-CSF for 12 Wks; Wkly Taxol x 12                                                                   | Completed | Breast Neoplasm                                           | Drug: Paclitaxel Drug: Doxorubicin Drug: Cyclophosphamide Drug: G-CSF                                     | Delivered dose intensity Toxicity Time to treatment failure Overall survival                                                                                                                                                                                                                                                                                                                                                                                                                                                                                                                                                                                                                                                                                                                                                                                                                                                                                                                                                                                                                                                                                                                                                                                                                                                                                                                                                                                                  | Phase 2 | 80  | Dec-01    | 13-Sep-12 |
| G-CSF | NCT01523678 | Weekly Paclitaxel/Carboplatin With Neupogen in Gynaecological                                                                                                                             | Completed | Ovarian Cancer Endometrial Cancer Uterine Cervical Cancer | Drug: Filgrastim Drug: Paclitaxel Drug: Carboplatin                                                       | Occurrence of grade 4 neutropenia Occurrence of other toxicities Occurrence of dose reductions and dose delays Progression free survival Overall survival                                                                                                                                                                                                                                                                                                                                                                                                                                                                                                                                                                                                                                                                                                                                                                                                                                                                                                                                                                                                                                                                                                                                                                                                                                                                                                                     | Phase 2 | 108 | Feb-12    | 10-Jul-19 |
| G-CSF | NCT00114764 | Trial Comparing Pegfilgrastim With Filgrastim as an Adjunct to Chemotherapy for Acute Myeloid                                                                                             | Completed | Myeloid Leukemia                                          | Drug: filgrastim Drug: pegfilgrastim                                                                      | Time to recover from severe neutropenia (ANC less than 0.5 X 10 <sup>9</sup> /L in chemotherapy induction 1.) Duration of severe neutropenia during induction chemotherapy                                                                                                                                                                                                                                                                                                                                                                                                                                                                                                                                                                                                                                                                                                                                                                                                                                                                                                                                                                                                                                                                                                                                                                                                                                                                                                    | Phase 2 | 84  | Mar-03    | 31-Oct-08 |
| G-CSF | NCT01079676 | A Non-inferiority Study Comparing Two Filgrastim Preparations in Breast Cancer                                                                                                            | Completed | Neutropenia in Breast Cancer                              | Drug: Filgrastim (Eurofarma) Drug: Filgrastim (Granulokine, Amgen)                                        | The study primary endpoint will be the rate of grade 4 neutropenia after the first cycle of chemotherapy, according to the classification Common Terminology Criteria for Adverse Events (CTC-AE) The febrile neutropenia rate.                                                                                                                                                                                                                                                                                                                                                                                                                                                                                                                                                                                                                                                                                                                                                                                                                                                                                                                                                                                                                                                                                                                                                                                                                                               | Phase 3 | 220 | Mar-11    | 16-Oct-12 |
| G-CSF | NCT01329900 | Chemotherapy Plus Ofatumumab Followed by G-CSF for Mobilization of Peripheral Blood Stem Cells in Patients With Non-Hodgkin's                                                             | Completed | Lymphoma                                                  | Drug: Ofatumumab Drug: Ifosfamide Drug: Etoposide Drug: Mesna Drug: G-CSF Procedure: Stem Cell Collection | Mobilization Rate                                                                                                                                                                                                                                                                                                                                                                                                                                                                                                                                                                                                                                                                                                                                                                                                                                                                                                                                                                                                                                                                                                                                                                                                                                                                                                                                                                                                                                                             | Phase 2 | 50  | 22-Aug-11 | 13-Jan-20 |
| G-CSF | NCT00194740 | Taxotere Plus Weekly Navelbine and G-CSF: A Study in Stage IV Breast                                                                                                                      | Completed | Breast Neoplasm                                           | Drug: Docetaxel Drug: Vinorelbine Drug: Filgrastim                                                        | Response to treatment Toxicity of treatment Time to progression Over all survival                                                                                                                                                                                                                                                                                                                                                                                                                                                                                                                                                                                                                                                                                                                                                                                                                                                                                                                                                                                                                                                                                                                                                                                                                                                                                                                                                                                             | Phase 2 | 48  | Nov-97    | 6-Dec-07  |
| G-CSF | NCT00050674 | Docetaxel and Gemcitabine With Filgrastim-SD/01 Support in Patients With Advanced Non-Small Cell Lung                                                                                     | Completed | Non-small Cell Lung Cancer                                | Drug: Filgrastim-SD/01                                                                                    |                                                                                                                                                                                                                                                                                                                                                                                                                                                                                                                                                                                                                                                                                                                                                                                                                                                                                                                                                                                                                                                                                                                                                                                                                                                                                                                                                                                                                                                                               | Phase 2 | 40  | Nov-01    | 27-Dec-12 |
| G-CSF | NCT00002501 | Cyclophosphamide and Filgrastim in Treating Patients With Stage IV, Relapsed, or Refractory Low-Grade Follicular Non-Hodgkin's Lymphoma                                                   | Completed | Lymphoma                                                  | Biological: filgrastim Drug: cyclophosphamide                                                             | Toxicity                                                                                                                                                                                                                                                                                                                                                                                                                                                                                                                                                                                                                                                                                                                                                                                                                                                                                                                                                                                                                                                                                                                                                                                                                                                                                                                                                                                                                                                                      | Phase 2 | 29  | Oct-92    | 1-Jul-16  |
| G-CSF | NCT00233961 | G-CSF in Stimulating Peripheral Stem Cells for Autologous Stem Cell Transplant in Treating Patients With Chronic Phase Chronic Myeloid Leukemia in Complete Remission                     | Completed | Leukemia                                                  | Biological: filgrastim                                                                                    | Feasibility and safety of harvesting chronic myeloid leukemia (CML) patients in continuous complete remission (CCR) by adequate CD34+ stem cell numbers post-harvest Effect of discontinuation of imatinib during harvesting by cytogenetic evaluation post-harvest                                                                                                                                                                                                                                                                                                                                                                                                                                                                                                                                                                                                                                                                                                                                                                                                                                                                                                                                                                                                                                                                                                                                                                                                           | Phase 1 | 20  | Jan-05    | 4-Feb-13  |
| G-CSF | NCT00004055 | Topotecan, Paclitaxel, and Filgrastim in Treating Patients With Previously Untreated Extensive-Stage Small Cell Lung Cancer                                                               | Completed | Lung Cancer                                               | Biological: filgrastim Drug: paclitaxel Drug: topotecan hydrochloride                                     | response rate survival                                                                                                                                                                                                                                                                                                                                                                                                                                                                                                                                                                                                                                                                                                                                                                                                                                                                                                                                                                                                                                                                                                                                                                                                                                                                                                                                                                                                                                                        | Phase 2 | 38  | Nov-99    | 13-Jul-16 |

|       |             |                                                                                                                                                                                                                                                                             |           |                                                                                                                                                                                                              |                                                                                                                                                                                                                                                                                              |                                                                                                                                                                                                                                                                                                                                                                                                                                                                                                                                                                                                                    |                 |     |            |           |
|-------|-------------|-----------------------------------------------------------------------------------------------------------------------------------------------------------------------------------------------------------------------------------------------------------------------------|-----------|--------------------------------------------------------------------------------------------------------------------------------------------------------------------------------------------------------------|----------------------------------------------------------------------------------------------------------------------------------------------------------------------------------------------------------------------------------------------------------------------------------------------|--------------------------------------------------------------------------------------------------------------------------------------------------------------------------------------------------------------------------------------------------------------------------------------------------------------------------------------------------------------------------------------------------------------------------------------------------------------------------------------------------------------------------------------------------------------------------------------------------------------------|-----------------|-----|------------|-----------|
| G-CSF | NCT02282215 | Safety and Efficacy of Human Myeloid Progenitor Cells (CLT-008) During Chemotherapy for Acute Myeloid Leukemia                                                                                                                                                              | Completed | Acute Myeloid Leukemia Neutropenia Infection                                                                                                                                                                 | Biological: CLT-008 Biological: G-CSF                                                                                                                                                                                                                                                        | Duration of febrile episodes (fever) Time to absolute neutrophil count (ANC) recovery Incidence and duration of febrile neutropenia Incidence and duration of infection Incidence and severity of mucositis Incidence of infusion reactions Incidence of Graft-versus-Host Disease (GVHD) Incidence of Adverse Events (AE) Incidence of                                                                                                                                                                                                                                                                            | Phase 2         | 163 | Dec-14     | 27-Sep-18 |
| G-CSF | NCT00410696 | Pegfilgrastim Versus Filgrastim After High-dose Chemotherapy                                                                                                                                                                                                                | Completed | Hematological Neoplasms Tumors                                                                                                                                                                               | Drug: Filgrastim Drug: Pegfilgrastim                                                                                                                                                                                                                                                         | Duration of aplasia period Immunological reconstitution                                                                                                                                                                                                                                                                                                                                                                                                                                                                                                                                                            | Phase 2         | 80  | Sep-06     | 1-Jul-13  |
| G-CSF | NCT01085058 | Predictive Value of the "Cytocapacity Test" Patients With Lymphoproliferative Diseases and                                                                                                                                                                                  | Completed | Hodgkin's Disease Non-Hodgkin Lymphomas Multiple Myelomas                                                                                                                                                    | Drug: lenograstim                                                                                                                                                                                                                                                                            | Incidence of infections Time to platelet engraftment                                                                                                                                                                                                                                                                                                                                                                                                                                                                                                                                                               | Phase 2 Phase 3 | 169 | May-03     | 11-Mar-10 |
| G-CSF | NCT00234169 | A Study of Peripheral Blood Progenitor Cells Mobilisation (PBPC) With VTP195183 Plus Granulocyte-Colony Stimulating Factor (G-CSF) Compared to Mobilisation With G-                                                                                                         | Completed | Multiple Myeloma Lymphoma                                                                                                                                                                                    | Drug: VTP195183                                                                                                                                                                                                                                                                              | PB CD34+ kinetics using VTP195183 plus G-CSF The toxicity of VTP195183 pretreatment when used with G-CSF                                                                                                                                                                                                                                                                                                                                                                                                                                                                                                           | Phase 1 Phase 2 | 30  | Oct-05     | 10-May-12 |
| G-CSF | NCT02428114 | A Multi Centre Study to Determine the Feasibility of Using an Integrated Consent Model to Compare Standard of Care Administration Schedules of G-CSF (Filgrastim) for Primary Prophylaxis of Chemotherapy-Induced Febrile Neutropenia in Early Stage Breast Cancer (React-G | Completed | Early Stage Breast Cancer                                                                                                                                                                                    |                                                                                                                                                                                                                                                                                              | Feasibility of performing this study will be measured with composite endpoints: physician engagement, time for local or provincial research ethics approval, accrual rates, and patient/physician compliance. Rates of documented febrile neutropenia (laboratory confirmation) ANC results at the end of each cycle of chemotherapy. hospital admissions percentage of patients who require chemotherapy dose delays percentage of patients who require chemotherapy dose decrease                                                                                                                                |                 | 142 | May-15     | 29-Sep-17 |
| G-CSF | NCT02441894 | Combination of Cabazitaxel With Prednisolone With Primary Prophylaxis With PEG-G-CSF in Treatment of Patients With Prostate Cancer                                                                                                                                          | Completed | Prostate Cancer                                                                                                                                                                                              | Drug: CABAZITAXEL XRP6258 Drug: PEG-G-CSF Drug: Prednisolone Drug: Dextchlorpheniramine<br>Diphenhydramine Drug: Ranitidine Drug: Metoclopramide, Granisetron, or Ondansetron Drug: Dexamethasone                                                                                            | Number of patients with FN (all grades) during study Cycle 1 Number of patients with FN (all grades) Number of patients with Grade $\geq 3$ neutropenia Number of patients with Grade $\geq 3$ diarrhea Number of dose delays in the start of drug administration due to AEs Number of dose reductions due to AEs Percent change in relative dose intensity due to AEs Number of patients with FN-related hospitalization Number of patients who used IV anti-infective drugs Changes of PSA levels from baseline Number of patients with adverse                                                                  | Phase 4         | 21  | April 2015 | 24-Jan-17 |
| G-CSF | NCT01339572 | Clinical And Economic Impact Of Upfront Plerixafor In Autologous Transplantation                                                                                                                                                                                            | Completed | Non-Hodgkin's Lymphoma Multiple Myeloma                                                                                                                                                                      | Drug: Plerixafor Drug: Filgrastim                                                                                                                                                                                                                                                            | Rate of successful collection with early introduction of plerixafor in patients predicted to be poor mobilizers Economic impact Kinetics of CD34+ mobilization with early introduction of plerixafor Graft composition                                                                                                                                                                                                                                                                                                                                                                                             | Phase 2         | 72  | April 2011 | 1-Aug-17  |
| G-CSF | NCT00002571 | SWOG-9320 Combination Chemotherapy, Radiation Therapy, and Antiviral Therapy in Treating Patients With AIDS-Related Lymphoma                                                                                                                                                | Completed | Lymphoma                                                                                                                                                                                                     | Biological: bleomycin sulfate Biological: filgrastim Drug: cyclophosphamide Drug: cytarabine Drug: doxorubicin hydrochloride Drug: etoposide Drug: leucovorin calcium Drug: methotrexate Drug: prednisone Drug: trimethoprim-sulfamethoxazole Drug: vincristine sulfate Radiation: radiation | Response                                                                                                                                                                                                                                                                                                                                                                                                                                                                                                                                                                                                           | Phase 2         | 52  | Jun-94     | 24-Jan-13 |
| G-CSF | NCT00838357 | A Multi-centre, Open Label, Single-arm Study Intended to Further Investigate the Safety and Efficacy of Plerixafor as a Front-line Mobilisation Agent in Combination With G-CSF in Patients With Lymphoma or MM (Multiple Myeloma)                                          | Completed | Lymphoma (Non-Hodgkin's Lymphoma) Hodgkin's Disease or Multiple Myeloma Front Line Mobilization Transplantation                                                                                              | Drug: Generic = Plerixafor                                                                                                                                                                                                                                                                   | To confirm the safety profile of plerixafor to mobilise stem cells when used in patients with lymphoma or MM who are eligible to undergo treatment with an autologous haematopoietic stem cell transplant To assess efficacy of plerixafor and granulocyte-colony stimulating factor (G-CSF) as a mobilisation regimen as measured by the number of CD34+ cells collected in each apheresis session To assess the clinical effectiveness of plerixafor and G-CSF mobilised stem cells by examining haematopoietic cell engraftment and graft status To examine the influence of CD34+ cell dose infused on time to | Phase 3         | 118 | Sep-08     | 24-Mar-15 |
| G-CSF | NCT00005810 | Combination Chemotherapy Plus Filgrastim in Treating Patients With Stage IV Prostate Cancer That Has Not Responded to Hormone Therapy                                                                                                                                       | Completed | Prostate Cancer                                                                                                                                                                                              | Biological: filgrastim Drug: carboplatin Drug: docetaxel Drug: estramustine phosphate sodium                                                                                                                                                                                                 | Response rate                                                                                                                                                                                                                                                                                                                                                                                                                                                                                                                                                                                                      | Phase 2         | 40  | Mar-00     | 14-Jul-16 |
| G-CSF | NCT00483067 | 2-Chlorodeoxyadenosine and Cytarabine in Patients With Idiopathic Hyper eosinophilic Syndrome (HES)                                                                                                                                                                         | Completed | Leukemia                                                                                                                                                                                                     | Drug: 2-CdA Drug: Ara-C Drug: G-CSF (Granulocyte colony-stimulating factor)                                                                                                                                                                                                                  | Patient Outcomes at 6 Weeks                                                                                                                                                                                                                                                                                                                                                                                                                                                                                                                                                                                        | Phase 2         | 13  | Mar-98     | 2-Aug-12  |
| G-CSF | NCT00002913 | Paclitaxel, Cisplatin, and Topotecan With or Without Filgrastim in Treating Patients With Newly Diagnosed Stage III or Stage IV Epithelial Ovarian Cancer                                                                                                                   | Completed | Brenner Tumor Ovarian Clear Cell Cystadenocarcinoma Ovarian Adenocarcinoma Ovarian Epithelial Carcinoma Ovarian Mixed Mucinous Cystadenocarcinoma Ovarian Serous Cystadenocarcinoma Ovarian Undifferentiated | Drug: paclitaxel Drug: cisplatin Drug: topotecan hydrochloride Biological: filgrastim                                                                                                                                                                                                        | Maximally tolerated doses (MTDs) of the combination of paclitaxel, Topotecan, and cisplatin administered without and with G-CSF based on dose-limiting toxicities (DLT) graded according to GOG Common Toxicity Criteria Overall survival Progression-free survival                                                                                                                                                                                                                                                                                                                                                | Phase 1         | 30  | Dec-96     | 24-Jan-13 |
| G-CSF | NCT02225652 | A Phase II Study of Dose Density Regimen With Fluorouracil, Epirubicin and Cyclophosphamide at Days 1, 4 Every 14 Days With Filgrastim Support Followed by Weekly Paclitaxel in Women With                                                                                  | Completed | Women With Primary Breast Cancer                                                                                                                                                                             | Drug: FEC (Fluorouracil, Epirubicin, Cyclophosphamide) + filgrastim + paclitaxel                                                                                                                                                                                                             | Tolerability of the treatment Toxicity Progression-free survival (PFS) Overall survival (OS) Relapse-free survival Kaplan-Meier curves                                                                                                                                                                                                                                                                                                                                                                                                                                                                             | Phase 2         | 11  | Sep-10     | 26-Aug-14 |

|       |             |                                                                                                                                                                                                                                       |           |                                                                                                                                      |                                                                                                                                                                                                                                                                                                        |                                                                                                                                                                                                                                                                                                                                                                                                                                                                                                                                     |               |     |            |            |
|-------|-------------|---------------------------------------------------------------------------------------------------------------------------------------------------------------------------------------------------------------------------------------|-----------|--------------------------------------------------------------------------------------------------------------------------------------|--------------------------------------------------------------------------------------------------------------------------------------------------------------------------------------------------------------------------------------------------------------------------------------------------------|-------------------------------------------------------------------------------------------------------------------------------------------------------------------------------------------------------------------------------------------------------------------------------------------------------------------------------------------------------------------------------------------------------------------------------------------------------------------------------------------------------------------------------------|---------------|-----|------------|------------|
| G-CSF | NCT01286675 | Effect of Eltrombopag Plus G-CSF on Human CD34+ Cell Mobilization in Multiple Myeloma Patients Undergoing ASCT                                                                                                                        | Completed | Multiple Myeloma                                                                                                                     | Drug: Eltrombopag                                                                                                                                                                                                                                                                                      | Evaluate the median fold increase in the number of CD34+ cells/kg mobilized at each dose level.[Evaluate the number of apheresis procedures required to obtain at least 2 x 10^6 CD34+ cells/kg at each dose level]Determine the maximum tolerated dose of eltrombopag with granulocyte colony-stimulating factor.[Evaluate the median fold increase in platelet counts at each of the dose levels]Evaluate the median fold increase in hematopoietic colony forming capacity of CD34+ cells at each dose level                     | Early Phase 1 | 19  | Mar-11     | 1-Mar-19   |
| G-CSF | NCT00001384 | A Pilot Trial of AC (Adriamycin, Cyclophosphamide) Chemotherapy With G-CSF (Granulocyte Colony-Stimulating Factor) Followed by Infusional Taxol (Paclitaxel) as Adjuvant Treatment for High Risk Stage II and Stage III Breast Cancer | Completed | Breast Cancer Breast Neoplasms                                                                                                       | Drug: Adriamycin Drug: cyclophosphamide Drug: paclitaxel                                                                                                                                                                                                                                               |                                                                                                                                                                                                                                                                                                                                                                                                                                                                                                                                     | Phase 2       | 35  | May-94     | 4-Mar-08   |
| G-CSF | NCT00035620 | Pegfilgrastim as Support to Pediatric Sarcoma Patients Receiving Chemotherapy                                                                                                                                                         | Completed | Sarcoma Neutropenia                                                                                                                  | Drug: pegfilgrastim Drug: filgrastim                                                                                                                                                                                                                                                                   | Duration of severe neutropenia in chemotherapy in cycles 1 and 3 Time to ANC recovery to greater than or equal to 0.5 x 10^9/L in cycles 1 and 3 Pharmacokinetic profile in chemotherapy cycles 1 and 3 Incidence of adverse events across all cycles of                                                                                                                                                                                                                                                                            | Phase 2       | 44  | April 2000 | 26-Feb-10  |
| G-CSF | NCT00016406 | S0012 Doxorubicin, Cyclophosphamide, and Paclitaxel With or Without Filgrastim in Treating Women With Inflammatory or Locally                                                                                                         | Completed | Breast Cancer                                                                                                                        | Biological: filgrastim Drug: cyclophosphamide Drug: doxorubicin Drug: paclitaxel Procedure: surgery                                                                                                                                                                                                    | Comparison of microscopic pathologic response rates Toxicity Comparison of delivered dose intensity Correlation of microscopic pathologic complete response with clinical complete response at the primary tumor site                                                                                                                                                                                                                                                                                                               | Phase 3       | 399 | May-01     | 24-Jan-13  |
| G-CSF | NCT00004853 | Comparison of Filgrastim and Filgrastim SD/01in Boosting White Cell Counts After Intensive Chemotherapy                                                                                                                               | Completed | Ewing's Sarcoma Rhabdomyosarcoma MPNST Synovial Sarcoma High-risk Sarcoma                                                            | Biological: Filgrastim Biological: Filgrastim-SD/01                                                                                                                                                                                                                                                    | Tolerance and toxicity PKs Compare neutrophil function Compare CD34 positive stem cell mobilization Compare days of febrile neutropenia, days on antibiotics, and inpatient days resulting from neutropenia Evaluate the role of functional cardiac MRI and serum troponin T levels in detecting early doxorubicin cardiotoxicity Assess methods of detecting minimal residual disease cDNA microarray analysis of gene expression, development of cell lines and xenotransplantation models, and exploration of apoptotic pathways | Phase 1       | 34  | 3-Mar-00   | 12-Nov-19  |
| G-CSF | NCT00004157 | Interleukin-11 Plus Filgrastim Prior to Peripheral Stem Cell Transplantation in Patients With Non-Hodgkin's Lymphoma, Hodgkin's Disease, Breast Cancer, or Other Solid                                                                | Completed | Breast Cancer Gestational Trophoblastic Tumor Kidney Cancer Lymphoma Neuroblastoma Ovarian Cancer Sarcoma Testicular Germ Cell Tumor | Biological: filgrastim Biological: recombinant interleukin-11                                                                                                                                                                                                                                          |                                                                                                                                                                                                                                                                                                                                                                                                                                                                                                                                     | Phase 2       |     | Aug-00     | April 2010 |
| G-CSF | NCT00008268 | Melphalan and Filgrastim to Stimulate Peripheral Stem Cells in Patients With Multiple Myeloma                                                                                                                                         | Completed | Multiple Myeloma and Plasma Cell Neoplasm                                                                                            | Biological: filgrastim Drug: melphalan                                                                                                                                                                                                                                                                 |                                                                                                                                                                                                                                                                                                                                                                                                                                                                                                                                     | Phase 2       |     | Aug-00     | 18-Jun-13  |
| G-CSF | NCT00002836 | Filgrastim Plus Chemotherapy Compared With Filgrastim Alone In Treating Women Undergoing Peripheral Stem Cell Transplantation For Breast Cancer                                                                                       | Completed | Breast Cancer                                                                                                                        | Biological: Filgrastim (G-CSF) Drug: Carmustine Drug: Cisplatin Drug: Cyclophosphamide (CTX) Drug: Etoposide Drug: Thiotepa Procedure: Peripheral Blood Stem Cell Transplantation                                                                                                                      | Compare Effectiveness of Chemotherapy + Filgrastim to Filgrastim Alone                                                                                                                                                                                                                                                                                                                                                                                                                                                              | Phase 3       | 184 | 26-Sep-95  | 6-Nov-18   |
| G-CSF | NCT00101127 | Docetaxel, Gemcitabine, and Filgrastim (G-CSF) or Pegfilgrastim in Treating Patients With Advanced, Persistent, or Recurrent Uterine                                                                                                  | Completed | Sarcoma                                                                                                                              | Biological: filgrastim Biological: pegfilgrastim Drug: docetaxel Drug: gemcitabine hydrochloride                                                                                                                                                                                                       | Antitumor activity Toxicity                                                                                                                                                                                                                                                                                                                                                                                                                                                                                                         | Phase 2       |     | Dec-03     | 14-Feb-14  |
| G-CSF | NCT00001426 | A Multi-Institutional Phase II Study of Cyclophosphamide, Paclitaxel, Cisplatin With G-CSF for Patients With Newly Diagnosed Advanced Stage Ovarian Cancer                                                                            | Completed | Ovarian Neoplasm                                                                                                                     | Drug: Cyclophosphamide Drug: Paclitaxel Drug: Cisplatin Drug: G-CSF                                                                                                                                                                                                                                    |                                                                                                                                                                                                                                                                                                                                                                                                                                                                                                                                     | Phase 2       | 66  | 3-Feb-95   | April 2018 |
| G-CSF | NCT00003739 | Antibiotic Therapy With or Without G-CSF in Treating Children With Neutropenia and Fever Caused by                                                                                                                                    | Completed | Fever, Sweats, and Hot Flashes Neutropenia Unspecified Tumor, Protocol Specific                                                      | Biological: filgrastim                                                                                                                                                                                                                                                                                 | Time to Resolution of Febrile Neutropenia Incidence of Change of the Initial Empiric Antibiotic Treatment                                                                                                                                                                                                                                                                                                                                                                                                                           | Phase 3       | 67  | Mar-99     | 14-Feb-14  |
| G-CSF | NCT01700413 | Efficacy and Toxicity of Increasing Doses of Idarubicin, Cytarabine and G-CSF in Acute Myeloid Leukemia                                                                                                                               | Completed | Di Novo Acute Myeloid Leukemia                                                                                                       | Drug: Idarubicin                                                                                                                                                                                                                                                                                       | Rate of complete remissions (CR) Rate of patients with adverse events as a measure of safety and tolerability Duration of hospitalization Mortality (as rate) related to study treatment Relapse at 6 months Survival at 9 months from diagnosis                                                                                                                                                                                                                                                                                    | Phase 2       | 48  | Oct-12     | 28-Jan-16  |
| G-CSF | NCT00002718 | T-cell Depleted Bone Marrow and G-CSF Stimulated Peripheral Stem Cell Transplantation From Related Donors in Treating Patients With Leukemia, Lymphoblastic Lymphoma, Myelodysplastic Syndrome, or Aplastic Anemia                    | Completed | Leukemia Lymphoma Myelodysplastic Syndromes Myelodysplastic/Myeloproliferative Neoplasms                                             | Biological: anti-thymocyte globulin Biological: filgrastim Drug: cyclophosphamide Drug: cytarabine Drug: methylprednisolone Drug: thiotepa Procedure: in vitro-treated bone marrow transplantation Procedure: in vitro-treated peripheral blood stem cell transplantation Radiation: radiation therapy | overall disease survival To correlate progenitor cell doses and doses of clonable T-cells                                                                                                                                                                                                                                                                                                                                                                                                                                           | Phase 2       | 31  | Nov-95     | 23-Dec-15  |

|       |             |                                                                                                                                                          |           |                                                                                                                                                                                  |                                                                                                                                |                                                                                                                                                                                                                                                                                                                                                                                                                                                                                                                                        |                 |     |            |           |
|-------|-------------|----------------------------------------------------------------------------------------------------------------------------------------------------------|-----------|----------------------------------------------------------------------------------------------------------------------------------------------------------------------------------|--------------------------------------------------------------------------------------------------------------------------------|----------------------------------------------------------------------------------------------------------------------------------------------------------------------------------------------------------------------------------------------------------------------------------------------------------------------------------------------------------------------------------------------------------------------------------------------------------------------------------------------------------------------------------------|-----------------|-----|------------|-----------|
| G-CSF | NCT00438958 | Sibling Donor Peripheral Stem Cell Transplant or Sibling Donor Bone Marrow Transplant in Treating Patients With Hematologic Cancers                      | Completed | Chronic Myeloproliferative Disorders Graft Versus Host Disease Leukemia Lymphoma Myelodysplastic Syndromes Secondary Myelofibrosis                                               | Biological: filgrastim Procedure: allogeneic bone marrow transplantation Procedure: peripheral blood stem cell transplantation | Time to treatment failure (extensive chronic graft-versus-host disease [GVHD], relapse, death) Time to neutrophil recovery Primary graft failure Overall survival Quality of life Time to acute GVHD Time to chronic GVHD Chronic GVHD details Cost Detailed donor and patient self-reported outcomes                                                                                                                                                                                                                                  | Phase 3         | 230 | Mar-07     | 5-Mar-14  |
| G-CSF | NCT00751868 | FEC With G-CSF Support Followed by Ixabepilone With G-CSF Support as Neoadjuvant Chemotherapy in BC                                                      | Completed | Breast Cancer                                                                                                                                                                    | Drug: Ixabepilone                                                                                                              | Pathologic Complete Response (pCR) Feasibility Tolerability for an individual patient is defined as the absence of hematologic toxicities requiring dose reduction as per protocol                                                                                                                                                                                                                                                                                                                                                     | Phase 2         | 47  | Sep-08     | 17-Dec-14 |
| G-CSF | NCT00000626 | Phase II Study of Filgrastim (G-CSF) Plus ABVD in the Treatment of HIV-Associated Hodgkin's Disease                                                      | Completed | HIV Infections Hodgkin's Disease                                                                                                                                                 | Drug: Vinblastine sulfate Drug: Dacarbazine Drug: Filgrastim Drug: Bleomycin sulfate Drug: Doxorubicin                         |                                                                                                                                                                                                                                                                                                                                                                                                                                                                                                                                        | Phase 2         | 27  |            | 23-May-12 |
| G-CSF | NCT00028925 | Without Filgrastim in Treating Patients With Previously Untreated Extensive-Stage Small Cell Lung                                                        | Completed | Lung Cancer                                                                                                                                                                      | Biological: filgrastim Drug: carboplatin Drug: topotecan hydrochloride Radiation: WBRT                                         | response rate overall survival                                                                                                                                                                                                                                                                                                                                                                                                                                                                                                         | Phase 2         | 27  | Nov-01     | 7-Dec-16  |
| G-CSF | NCT03343145 | A Study to Evaluate the Efficacy, Safety and Immunogenicity of Leucostim® Versus Neupogen® in Breast Cancer Patients                                     | Completed | Breast Cancer                                                                                                                                                                    | Biological: Leucostim 5µg/kg/day Biological: Neupogen 5µg/kg/day                                                               | Mean duration of Grade 4 Neutropenia (i.e. ANC < 500/mm3) in Cycle 1 Depth of ANC nadir after chemotherapy in Cycle 1 Time to ANC recovery in Cycle 1 Incidence of febrile neutropenia in Cycle 1;                                                                                                                                                                                                                                                                                                                                     | Phase 3         | 143 | 12-Jan-17  | 23-Dec-19 |
| G-CSF | NCT01297543 | Safety Study of Human Myeloid Progenitor Cells (CLT-008) After Chemotherapy for Leukemia                                                                 | Completed | Acute Myeloid Leukemia Acute Lymphoblastic Leukemia Chronic Myeloid Leukemia Myelodysplasia                                                                                      | Biological: human myeloid progenitor cells Drug: G-CSF                                                                         | Incidence of serious adverse reactions Duration of neutropenia Duration of thrombocytopenia Duration of presence of CLT-008 derived cells in blood Duration of presence of CLT-008 derived cells in bone marrow Incidence of mucositis Incidence of infections Duration of fever Duration of antibiotic use Incidence of hospitalization Duration                                                                                                                                                                                      | Phase 1 Phase 2 | 45  | Mar-11     | 1-Jul-16  |
| G-CSF | NCT00003691 | Combination Chemotherapy With or Without G-CSF in Treating Patients With Stage III, Stage IV, or Recurrent Endometrial Cancer                            | Completed | Endometrial Cancer                                                                                                                                                               | Biological: filgrastim Drug: cisplatin Drug: doxorubicin hydrochloride Drug: paclitaxel                                        |                                                                                                                                                                                                                                                                                                                                                                                                                                                                                                                                        | Phase 3         | 240 | Dec-98     | 9-Jul-13  |
| G-CSF | NCT00117455 | A Study of Peripheral Blood Progenitor Cell (PBPC) Mobilisation by Chemotherapy With Pegfilgrastim or Filgrastim in Subjects With Non-Hodgkin's Lymphoma | Completed | Non-Hodgkin's Lymphoma                                                                                                                                                           | Drug: pegfilgrastim Drug: filgrastim                                                                                           | Adequate collection of PBPC's to enable transplant following high dose chemotherapy Time to engraftment post-transplant                                                                                                                                                                                                                                                                                                                                                                                                                | Phase 2         |     |            | 16-May-08 |
| G-CSF | NCT00536081 | Various G-CSF Regimens to Prevent Infection During Chemotherapy                                                                                          | Completed | Breast Cancer Chemotherapy Febrile Neutropenia                                                                                                                                   | Drug: pegfilgrastim                                                                                                            | number of febrile neutropenia episodes costs per treatment arm Febrile neutropenia rates per cycle number. Other haematological and non-haematological toxicities. Number of chemotherapy cycles delivered. Dose and dose-intensity of chemotherapy. Disease progression. Number of toxic deaths per treatment arm.                                                                                                                                                                                                                    | Phase 3         | 172 | Jan-08     | 6-Nov-19  |
| G-CSF | NCT00066092 | Pegfilgrastim PBPC Mobilization Study                                                                                                                    | Completed | Lymphoma Hodgkin's Lymphoma Non-Hodgkin's Lymphoma Hematology Oncology                                                                                                           | Drug: pegfilgrastim 12 mg Drug: filgrastim Drug: pegfilgrastim 6 mg                                                            | CD34+ collection during the collection phase Time to ANC and platelet engraftment post-transplant                                                                                                                                                                                                                                                                                                                                                                                                                                      | Phase 2         | 41  | April 2003 | 28-Feb-08 |
| G-CSF | NCT00118326 | Donor Bone Marrow Transplant in Treating Young Patients With Cancer or a Non-Cancerous Disease                                                           | Completed | Kidney Cancer Leukemia Lymphoma Myelodysplastic Syndromes Neuroblastoma Sarcoma                                                                                                  | Biological: filgrastim Procedure: allogeneic bone marrow transplantation                                                       | Safety and feasibility                                                                                                                                                                                                                                                                                                                                                                                                                                                                                                                 | Phase 1 Phase 2 |     | Aug-03     | 14-May-10 |
| G-CSF | NCT01164345 | Mozobil for Autologous Stem Cell Mobilization                                                                                                            | Completed | Non-Hodgkin's Lymphoma Hodgkin's Lymphoma Stem Cell Mobilization Autologous Stem Cell Transplantation                                                                            | Drug: Plerixafor                                                                                                               | Mobilisation success rate engraftment after transplantation                                                                                                                                                                                                                                                                                                                                                                                                                                                                            | Phase 2         | 20  | Jun-10     | 3-Dec-15  |
| G-CSF | NCT00015938 | S0102: Docetaxel, Vinorelbine, and Filgrastim in Treating Women With Stage IV Breast Cancer                                                              | Completed | Breast Cancer                                                                                                                                                                    | Biological: filgrastim Drug: docetaxel Drug: vinorelbine                                                                       |                                                                                                                                                                                                                                                                                                                                                                                                                                                                                                                                        | Phase 2         | 95  | May-01     | 24-Jan-13 |
| G-CSF | NCT00516152 | Phase II Study Evaluating Busulfan and Fludarabine as Preparative Therapy in Adults With Hematopoietic Disorders Undergoing                              | Completed | Chronic Myeloid Leukemia Acute Myelogenous Leukemia Myelodysplasia Acute Lymphocytic Leukemia Severe Aplastic Anemia Non-Hodgkin's Lymphoma Lymphoproliferative Disease Multiple | Drug: Busulfan/Fludarabine phosphate/Tacrolimus/Methotrexate/G-CSF                                                             |                                                                                                                                                                                                                                                                                                                                                                                                                                                                                                                                        | Phase 2         | 36  | Nov-02     | 26-Jan-09 |
| G-CSF | NCT00794261 | Stem Cell Mobilization With Pegfilgrastim in Lymphoma and Myeloma                                                                                        | Completed | Lymphoma Myeloma                                                                                                                                                                 | Drug: Injection of Pegfilgrastim Drug: Injection of Filgrastim                                                                 | Efficacy of a single administration of Pegfilgrastim at D5 in shortening the duration of febrile neutropenia Average duration of neutropenia, average duration of thrombocytopenia, number of days with temperature, number of red blood cell units and platelet concentrates transfused to the patient Average duration of hospital stay since PSC transplantation Number of bacterial and/or viral and/or fungal infections, average duration of antibiotic, antiviral and/or antifungal treatment Treatment tolerance Evaluation of | Phase 2         | 150 | Sep-08     | 8-Jul-10  |
| G-CSF | NCT00462358 | A Study of ARRY-520 in Patients With Advanced Cancer                                                                                                     | Completed | Advanced Solid Tumors                                                                                                                                                            | Drug: ARRY-520, KSP(Eg5) inhibitor; intravenous Drug: Filgrastim, granulocyte-colony stimulating factor (G-CSF); subcutaneous  | Establish the maximum tolerated dose (MTD) of study drug, with and without G-CSF. Characterize the safety profile of the study drug in terms of adverse events, clinical laboratory tests and electrocardiograms. Characterize the pharmacokinetics of the study drug. Assess the efficacy of the study drug in terms of tumor response.                                                                                                                                                                                               | Phase 1         | 41  | April 2007 | 3-Oct-11  |
| G-CSF | NCT00145002 | A Study for Aggressive Adult T-cell Leukemia-lymphoma (ATLL)                                                                                             | Completed | Adult T-cell Leukemia Lymphoma                                                                                                                                                   | Drug: VCAP-AMP-VECP with G-CSF and intrathecal prophylaxis Drug: biweekly-CHOP with G-CSF and intrathecal                      | Overall survival Toxicity CR rate Progression free survival                                                                                                                                                                                                                                                                                                                                                                                                                                                                            | Phase 3         | 130 | Aug-98     | 22-Sep-16 |
| G-CSF | NCT01415713 | The Study of Metastatic Pancreatic Adenocarcinoma                                                                                                        | Completed | Metastatic Pancreatic Adenocarcinoma                                                                                                                                             | Drug: S-1, Leucovorin, Oxaliplatin, Gemcitabine                                                                                | to determine the following items in patients with metastatic pancreatic adenocarcinoma receiving SLOG to evaluate the following items in patients with metastatic pancreatic adenocarcinoma receiving SLOG treatment.                                                                                                                                                                                                                                                                                                                  | Phase 1 Phase 2 | 73  | Mar-12     | 4-May-16  |
| G-CSF | NCT03246009 | Fusion Protein rHSA/GCSF Clinical Study on Breast Cancer Patients                                                                                        | Completed | Chemotherapy-induced Neutropenia Cancer, Breast                                                                                                                                  | Drug: rHSA/GCSF                                                                                                                | Number of adverse events AUC                                                                                                                                                                                                                                                                                                                                                                                                                                                                                                           | Phase 1         | 24  | 21-Jan-16  | 11-Aug-17 |

|       |              |                                                                                                                                                                 |           |                                                                                                                                                                                                      |                                                                                                                                                                                 |                                                                                                                                                                                                                                                                                                                                                                                                                                                                    |         |     |            |           |
|-------|--------------|-----------------------------------------------------------------------------------------------------------------------------------------------------------------|-----------|------------------------------------------------------------------------------------------------------------------------------------------------------------------------------------------------------|---------------------------------------------------------------------------------------------------------------------------------------------------------------------------------|--------------------------------------------------------------------------------------------------------------------------------------------------------------------------------------------------------------------------------------------------------------------------------------------------------------------------------------------------------------------------------------------------------------------------------------------------------------------|---------|-----|------------|-----------|
| G-CSF | NCT00053131  | Combination Chemotherapy Followed By Filgrastim or Sargramostim in Treating Patients With Relapsed or Refractory Acute Myeloid Leukemia or Acute                | Completed | Leukemia                                                                                                                                                                                             | Biological: filgrastim Biological: sargramostim Drug: cytarabine Drug: mitoxantrone hydrochloride                                                                               |                                                                                                                                                                                                                                                                                                                                                                                                                                                                    | Phase 2 |     | Jan-99     | 8-Mar-11  |
| G-CSF | NCT00001272  | A Phase I Study of Taxol, Cisplatin, Cyclophosphamide and Granulocyte Colony-Stimulating Factor (G-CSF) in Previously Nontreated Ovarian Cancer Patients        | Completed | Ovarian Neoplasms                                                                                                                                                                                    | Drug: taxol                                                                                                                                                                     |                                                                                                                                                                                                                                                                                                                                                                                                                                                                    | Phase 1 | 60  | Sep-91     | 4-Mar-08  |
| G-CSF | NCT00724386  | Concomitant Chemoradiotherapy With Weekly Paclitaxel and Vinorelbine and Granulocyte Colony Stimulating Factor (G-CSF) Support in Patients With Advanced Breast | Completed | Breast Cancer                                                                                                                                                                                        | Drug: Paclitaxel Drug: Vinorelbine Drug: Filgrastim Radiation: Radiation                                                                                                        | feasibility of administering study therapy to limit skin toxicity dose-limiting toxicity response time to progression overall survival Bcl-2 detection by immunohistochemistry                                                                                                                                                                                                                                                                                     | Phase 1 | 26  | Jun-99     | 7-Mar-14  |
| G-CSF | NCT00002833  | Peripheral Stem Cell Transplantation Plus Filgrastim in Treating Patients With Acute or Chronic Myelogenous Leukemia                                            | Completed | Graft Versus Host Disease Leukemia Myelodysplastic Syndromes                                                                                                                                         | Biological: Filgrastim Drug: Cladribine Drug: Cyclosporine Drug: Cytarabine (Ara-C) Drug: Fludarabine Phosphate Drug: Idarubicin Drug: Methylprednisolone Procedure: Peripheral | Toxic Effects of Peripheral Stem Cell Transplantation + Filgrastim                                                                                                                                                                                                                                                                                                                                                                                                 | Phase 2 | 53  | Oct-94     | 30-Jul-12 |
| G-CSF | NCT00004189  | Rebectamycin Analog and Cisplatin With or Without Filgrastim in Treating Patients With Advanced Cancer                                                          | Completed | Lymphoma Small Intestine Cancer Unspecified Adult Solid Tumor, Protocol Specific                                                                                                                     | Biological: filgrastim Drug: becatecarin Drug: cisplatin                                                                                                                        |                                                                                                                                                                                                                                                                                                                                                                                                                                                                    | Phase 1 | 40  | Oct-99     | 11-Feb-13 |
| G-CSF | NCT00461955  | Injection of ex Vivo Amplified G-CSF Mobilised Autologous Peripheral Blood Stem Cell Transplantation                                                            | Completed | Multiple Myeloma                                                                                                                                                                                     | Procedure: autologous peripheral blood stem cell transplantation, ex vivo amplified                                                                                             | Hematopoietic reconstitution defined by a neutrophils number > 500/mm3 at day 7 after injection of in vitro amplified graft and by a platelets number > 20000/mm3, at day 15 after the injection of in vitro amplified graft, without transfusion. Immediate Toxicity of the injection of the amplified graft ; Quantitative immunological Reconstitution Stability of the hematopoiesis in the long term Absence of cytogenetics abnormalities not related to the | Phase 2 | 13  | Aug-07     | 4-Nov-10  |
| G-CSF | NCT00004137  | S9914: Combination Chemotherapy Plus Filgrastim in Untreated Extensive-Stage Small Cell Lung                                                                    | Completed | Lung Cancer                                                                                                                                                                                          | Biological: filgrastim Drug: carboplatin Drug: paclitaxel Drug: topotecan hydrochloride                                                                                         |                                                                                                                                                                                                                                                                                                                                                                                                                                                                    | Phase 2 | 88  | Oct-99     | 15-Feb-13 |
| G-CSF | NCT00002539  | Combination Chemotherapy and Surgery With or Without G-CSF in Treating Patients With Osteosarcoma                                                               | Completed | Sarcoma                                                                                                                                                                                              | Biological: filgrastim Drug: cisplatin Drug: doxorubicin hydrochloride Procedure: conventional surgery                                                                          |                                                                                                                                                                                                                                                                                                                                                                                                                                                                    | Phase 3 | 214 | Aug-93     | 24-Sep-12 |
| G-CSF | NCT000049114 | Tipifarnib, Doxorubicin, and Cyclophosphamide in Treating Women With Locally Advanced Breast Cancer                                                             | Completed | Inflammatory Breast Cancer Stage II Breast Cancer Stage IIIA Breast Cancer Stage IIIB Breast Cancer Stage IIIC Breast Cancer                                                                         | Drug: doxorubicin hydrochloride Drug: cyclophosphamide Drug: tipifarnib Biological: filgrastim Procedure: therapeutic conventional surgery Other:                               | Pathological complete response in the breast Proportion of patients who have a clinical complete response Grade 3 or 4 toxicities assessed using NCI CTCAE version 3.0 Median disease-free survival Percentage of patients free of disease                                                                                                                                                                                                                         | Phase 2 | 62  | Feb-03     | 6-Jun-13  |
| G-CSF | NCT00003597  | Colony-Stimulating Factors in Treating Children With Recurrent or Refractory Solid Tumors                                                                       | Completed | Cancer                                                                                                                                                                                               | Biological: recombinant human thrombopoietin Drug: carboplatin Drug: etoposide Drug: ifosfamide Biological: G-                                                                  | Determine the pharmacokinetics and toxicities associated with the administration of recombinant human thrombopoietin (rhTPO) Evaluate the time for patients to demonstrate platelet recovery                                                                                                                                                                                                                                                                       | Phase 1 | 16  | Nov-98     | 24-Jul-14 |
| G-CSF | NCT00001427  | A Phase II Trial of 72-Hour Continuous IV Infusion of 9-Aminocamptothecin With G-CSF Support in Patients With Advanced Ovarian Cancer Previously Treated        | Completed | Ovarian Neoplasms                                                                                                                                                                                    | Drug: 9-aminocamptothecin                                                                                                                                                       |                                                                                                                                                                                                                                                                                                                                                                                                                                                                    | Phase 2 | 40  | Jan-95     | 4-Mar-08  |
| G-CSF | NCT00014456  | Combination Chemotherapy Plus Filgrastim in Treating Patients With Advanced Solid Tumors                                                                        | Completed | Bladder Cancer Breast Cancer Carcinoma of Unknown Primary Esophageal Cancer Gastric Cancer Head and Neck Cancer Lung Cancer Melanoma (Skin) Ovarian Cancer Pancreatic Cancer Prostate Cancer Sarcoma | Biological: filgrastim Drug: docetaxel Drug: gemcitabine hydrochloride                                                                                                          | Determine the maximal tolerated dose of docetaxel in combination with gemcitabine given intravenously every 2 weeks with pegfilgrastim support Define dose limiting adverse events associated with the combination Objective antitumor response                                                                                                                                                                                                                    | Phase 1 | 35  | Mar-00     | 28-Aug-13 |
| G-CSF | NCT00791947  | A Nordic Phase II Study of PTCL Based on Dose-intensive Induction and High-dose Consolidation With                                                              | Completed | Peripheral T-Cell Lymphoma                                                                                                                                                                           | Drug: CHOEP + G-CSF followed by BEAM                                                                                                                                            | Time to treatment failure Overall survival                                                                                                                                                                                                                                                                                                                                                                                                                         | Phase 2 | 166 | Oct-01     | 8-Sep-11  |
| G-CSF | NCT00003294  | Chemotherapy Given With Amifostine and Filgrastim in Treating Patients With Recurrent or Metastatic                                                             | Completed | Leukemia Lymphoma Unspecified Adult Solid Tumor, Protocol Specific                                                                                                                                   | Biological: filgrastim Drug: amifostine trihydrate Drug: carboplatin Drug: paclitaxel                                                                                           |                                                                                                                                                                                                                                                                                                                                                                                                                                                                    | Phase 1 | 24  | May-97     | 7-Mar-11  |
| G-CSF | NCT00005800  | Doxorubicin and Docetaxel in Treating Women With Stage III                                                                                                      | Completed | Breast Cancer                                                                                                                                                                                        | Biological: Filgrastim Drug: Docetaxel Drug: Doxorubicin Procedure: Surgery                                                                                                     | Pathological Response Rate                                                                                                                                                                                                                                                                                                                                                                                                                                         | Phase 2 | 45  | April 1999 | 25-Sep-12 |
| G-CSF | NCT00117897  | Treatment for Subjects With Non-Hodgkin's Lymphoma                                                                                                              | Completed | Non-Hodgkin's Lymphoma                                                                                                                                                                               | Drug: pegfilgrastim Drug: Filgrastim                                                                                                                                            | The primary objective was to provide preliminary information on the ability of pegfilgrastim or Filgrastim to support planned dose on time (PDOT) application of CHOP chemotherapy with Rituximab given every 14 days, to subjects with NHL. The proportion of chemotherapy cycles given at the PDOT in both arms. Response rates (complete response and partial response) in both arms The safety profile in cycles 1-6 Subject self-reported outcomes            | Phase 2 |     | Jul-02     | 20-Jul-09 |

|       |             |                                                                                                                                                                                                                                          |           |                                                                                                                                     |                                                                                                                                                                                                                                                                                     |                                                                                                                                                                                                                                                                                                                                                                                                                                                                                                                      |         |     |            |                |
|-------|-------------|------------------------------------------------------------------------------------------------------------------------------------------------------------------------------------------------------------------------------------------|-----------|-------------------------------------------------------------------------------------------------------------------------------------|-------------------------------------------------------------------------------------------------------------------------------------------------------------------------------------------------------------------------------------------------------------------------------------|----------------------------------------------------------------------------------------------------------------------------------------------------------------------------------------------------------------------------------------------------------------------------------------------------------------------------------------------------------------------------------------------------------------------------------------------------------------------------------------------------------------------|---------|-----|------------|----------------|
| G-CSF | NCT0002804  | Combination Chemotherapy, Surgery, and Radiation Therapy in Treating Children With Advanced Soft Tissue Sarcoma                                                                                                                          | Completed | Sarcoma                                                                                                                             | Biological: filgrastim Drug: doxorubicin hydrochloride Drug: ifosfamide Drug: mesna Drug: vincristine sulfate Procedure: conventional surgery Radiation: brachytherapy Radiation: low-LET cobalt-60 gamma ray therapy Radiation: low-LET electron therapy Radiation: low-LET photon | Estimate the response rate to the combination of vincristine, ifosfamide, and doxorubicin (VID), with G-CSF support Event-free Survival Establish a bank of frozen tissue (tumor and peripheral blood)                                                                                                                                                                                                                                                                                                               | Phase 2 | 43  | Sep-96     | 25-Jul-14      |
| G-CSF | NCT00038545 | A Phase II Study of Paclitaxel and Topotecan With Filgrastim-SD/01 Support For Relapsed and Refractory Aggressive Non-                                                                                                                   | Completed | Non-Hodgkin's Lymphoma                                                                                                              | Drug: Filgrastim SD/01 Drug: Paclitaxel Drug: Topotecan                                                                                                                                                                                                                             |                                                                                                                                                                                                                                                                                                                                                                                                                                                                                                                      | Phase 2 | 25  | 18-May-01  | 30-Oct-18      |
| G-CSF | NCT00187031 | A Phase II Study of Topotecan in Children With Recurrent Wilms                                                                                                                                                                           | Completed | Wilms Tumor                                                                                                                         | Drug: Topotecan, Filgrastim (G-CSF), Pegfilgrastim                                                                                                                                                                                                                                  | Response rate (complete and partial response as per RECIST criteria).                                                                                                                                                                                                                                                                                                                                                                                                                                                | Phase 2 | 37  | Nov-02     | 4-Jun-08       |
| G-CSF | NCT01074060 | Plerixafor and Filgrastim Following Cyclophosphamide for Stem Cell Mobilization in Patients With Multiple Myeloma                                                                                                                        | Completed | Refractory Multiple Myeloma Stage I Multiple Myeloma Stage II Multiple Myeloma Stage III Multiple Myeloma                           | Drug: plerixafor Biological: filgrastim Drug: cyclophosphamide Procedure: autologous hematopoietic stem cell transplantation Other: laboratory biomarker analysis                                                                                                                   | To assess the MTD ( maximum tolerated dose) of IV plerixafor when given post cyclophosphamide and GCSF for stem cell priming.Dose limiting toxicity will be defined as any grade 3 or 4 nonhematologic toxicity. Tolerability and safety of PLERIXAFOR Frequency of collecting 5 x 10^6 or more CD34+ cells/kg in 2 or less apheresis days Percentage of plasma cells Completion of 100 days post-                                                                                                                   | Phase 1 | 18  | April 2010 | 15-Feb-13      |
| G-CSF | NCT00001250 | Effect of Preoperative Chemotherapy on Axillary Lymph Node Metastases in Stage II Breast Cancer: A Prospective Randomized Trial                                                                                                          | Completed | Breast Neoplasm Neoplasm Metastasis                                                                                                 | Drug: preoperative dose intense chemotherapy (FLAC/G-CSF)                                                                                                                                                                                                                           |                                                                                                                                                                                                                                                                                                                                                                                                                                                                                                                      | Phase 2 | 130 | Dec-89     | 4-Mar-08       |
| G-CSF | NCT00028600 | Peripheral Stem Cell Transplant in Treating Patients With Multiple Myeloma                                                                                                                                                               | Completed | Multiple Myeloma Plasma Cell Neoplasm                                                                                               | Biological: filgrastim Biological: CD34+ cells Drug: cyclophosphamide Drug: fludarabine phosphate Drug: melphalan Drug: methotrexate Drug:                                                                                                                                          | Treatment-related mortality Treatment Completion Rate Response Rate Chimerism Rate GVHD Incidence Survival Correlation of cytogenetics and response                                                                                                                                                                                                                                                                                                                                                                  | Phase 2 | 60  | Nov-01     | 4-Jul-16       |
| G-CSF | NCT03511378 | Immunogenicity Assessment of Peg-filgrastim vs. Neulasta® as Adjunct to Chemotherapy in Patients With Breast Cancer                                                                                                                      | Completed | Breast Cancer                                                                                                                       | Drug: Lupin's Pegfilgrastim Drug: Neulasta®                                                                                                                                                                                                                                         | Primary Immunogenicity Endpoint: Comparison of cumulative incidence of anti-pegfilgrastim antibodies (binding & neutralizing) at the end of cycle 4 (Day 84) Secondary Immunogenicity endpoint: Comparison of cumulative incidence of anti-peg antibodies (binding & neutralizing) between treatment groups at the end of cycle 4 (Day 84) Secondary Immunogenicity endpoint: Comparison of incidence of anti-pegfilgrastim antibodies (binding & neutralizing) to Pegfilgrastim between treatment groups on Day 10. | Phase 4 | 138 | 6-Mar-18   | 8-Oct-19       |
| G-CSF | NCT02305979 | Evaluation of Loratadine for G-CSF Induced Bone Pain in Patients With Hematologic Malignancies                                                                                                                                           | Completed | Leukemia Lymphoma                                                                                                                   | Drug: Loratadine                                                                                                                                                                                                                                                                    | Incidence of bone pain following G-CSF administration                                                                                                                                                                                                                                                                                                                                                                                                                                                                |         | 61  | Dec-14     | 3-Jul-18       |
| G-CSF | NCT00021333 | Paclitaxel and Cisplatin Plus Radiation Therapy Followed by Filgrastim in Treating Patients With Recurrent Head and Neck Cancer or                                                                                                       | Completed | Head and Neck Cancer Lung Cancer                                                                                                    | Biological: filgrastim Drug: cisplatin Drug: paclitaxel Radiation: radiation therapy                                                                                                                                                                                                |                                                                                                                                                                                                                                                                                                                                                                                                                                                                                                                      | Phase 2 | 29  | Sep-99     | April 17, 2013 |
| G-CSF | NCT00006760 | Combination Chemotherapy in Treating Children With Refractory or Relapsed Hodgkin's Lymphoma                                                                                                                                             | Completed | Lymphoma                                                                                                                            | Biological: filgrastim Drug: ifosfamide Drug: vinorelbine tartrate                                                                                                                                                                                                                  | Overall response rate Rate of successful PBSC harvest during re-induction defined as the ability to harvest 5 x 10^6 CD34+ cells/kg Biologic markers Cardiac, hepatic, renal, hematologic toxicity Toxic death                                                                                                                                                                                                                                                                                                       | Phase 2 | 66  | May-01     | 26-Jul-13      |
| G-CSF | NCT00002866 | Docetaxel and Epirubicin With and Without G-CSF in Treating Women With Metastatic Breast Cancer                                                                                                                                          | Completed | Breast Cancer Neutropenia                                                                                                           | Biological: filgrastim Drug: docetaxel Drug: epirubicin hydrochloride                                                                                                                                                                                                               |                                                                                                                                                                                                                                                                                                                                                                                                                                                                                                                      | Phase 1 | 50  | Aug-96     | 9-Nov-10       |
| G-CSF | NCT02467868 | Efficacy and Safety Study With MYL-1401H and Neulasta                                                                                                                                                                                    | Completed | Breast Neoplasms Chemotherapy-Induced Febrile Neutropenia                                                                           | Biological: MYL-1401H Biological: Neulasta                                                                                                                                                                                                                                          | Mean Duration of Severe Neutropenia (DSN), defined as consecutive days with absolute neutrophil count (ANC) < 0.5 x 109/L The rate of febrile neutropenia (FN)                                                                                                                                                                                                                                                                                                                                                       | Phase 3 | 193 | Mar-15     | 16-Mar-16      |
| G-CSF | NCT01790737 | First Line Treatment Trial in Multiple Myeloma, Finnish Myeloma Group- Multiple Myeloma 02                                                                                                                                               | Completed | Multiple Myeloma                                                                                                                    | Drug: Cyclophosphamide Drug: Filgrastim                                                                                                                                                                                                                                             | Immunophenotypic response Progression free survival                                                                                                                                                                                                                                                                                                                                                                                                                                                                  | Phase 2 | 80  | Jan-13     | 1-Mar-19       |
| G-CSF | NCT01763398 | Analysis of the Risk Factors for the Neutropenic Fever in the High Risk NHL Patients for Developing Febrile Neutropenia Who Received 3-weekly CHOP-like Chemotherapy With Primary G-CSF Prophylaxis; Prospective Multicenter Observation | Completed | Non-Hodgkin's Lymphoma                                                                                                              |                                                                                                                                                                                                                                                                                     | Hospitalization period                                                                                                                                                                                                                                                                                                                                                                                                                                                                                               |         | 500 | Sep-11     | 1-Nov-16       |
| G-CSF | NCT00306111 | Pegfilgrastim vs. Filgrastim - Comparison of Mobilized Blood Stem Cells in Patients With Non Hodgkin-                                                                                                                                    | Completed | Non-Hodgkin Lymphoma                                                                                                                | Drug: pegfilgrastim                                                                                                                                                                                                                                                                 | Hematopoietic recovery after autologous stem cell transplantation Intraindividual comparison of quantity/quality of circulating stem cells                                                                                                                                                                                                                                                                                                                                                                           | Phase 2 | 14  | Jan-06     | 29-May-14      |
| G-CSF | NCT00019474 | Combination Chemotherapy Plus Interferon Alfa Followed by Filgrastim in Treating Patients With Gastrointestinal Tract Cancer                                                                                                             | Completed | Extrahepatic Bile Duct Cancer Gastric Cancer Gastrointestinal Carcinoid Tumor Liver Cancer Pancreatic Cancer Small Intestine Cancer | Biological: filgrastim Biological: recombinant interferon alfa Drug: fluorouracil Drug: hydroxyurea                                                                                                                                                                                 |                                                                                                                                                                                                                                                                                                                                                                                                                                                                                                                      | Phase 2 | 60  | Mar-98     | 14-Sep-18      |

|       |             |                                                                                                                                                                                                                                         |           |                                                                     |                                                                                                                                                                                                                |                                                                                                                                                                                                                                                                                                                                                                                                                                                                                                                                                                                                                                                                                                                                                                                                                                                                               |                 |     |            |                |
|-------|-------------|-----------------------------------------------------------------------------------------------------------------------------------------------------------------------------------------------------------------------------------------|-----------|---------------------------------------------------------------------|----------------------------------------------------------------------------------------------------------------------------------------------------------------------------------------------------------------|-------------------------------------------------------------------------------------------------------------------------------------------------------------------------------------------------------------------------------------------------------------------------------------------------------------------------------------------------------------------------------------------------------------------------------------------------------------------------------------------------------------------------------------------------------------------------------------------------------------------------------------------------------------------------------------------------------------------------------------------------------------------------------------------------------------------------------------------------------------------------------|-----------------|-----|------------|----------------|
| G-CSF | NCT01690507 | Decitabine Combining Modified CAG Followed by HLA Haploidentical Peripheral Blood Mononuclear Cells Infusion for Elderly Patients With Acute Myeloid Leukemia(AML)                                                                      | Completed | MDS AML                                                             | Drug: Decitabine Drug: Cytarabine Drug: aclacinomycin Drug: Granulocyte colony-stimulating factor Other: HLA haploidentical mononuclear cells infusion                                                         | CR rate overall survival                                                                                                                                                                                                                                                                                                                                                                                                                                                                                                                                                                                                                                                                                                                                                                                                                                                      | Phase 1 Phase 2 | 29  | Nov-12     | 25-Feb-16      |
| G-CSF | NCT00070304 | Gemcitabine and Vinorelbine in Treating Young Patients With Recurrent or Refractory Hodgkin's                                                                                                                                           | Completed | Lymphoma                                                            | Biological: filgrastim Drug: gemcitabine hydrochloride Drug: vinorelbine tartrate                                                                                                                              | Tumor Response Rate Toxicities                                                                                                                                                                                                                                                                                                                                                                                                                                                                                                                                                                                                                                                                                                                                                                                                                                                | Phase 2         | 33  | Jul-04     | 26-Jul-13      |
| G-CSF | NCT00821249 | A Study of ARRY-520 in Patients With Relapsed or Refractory Multiple Myeloma                                                                                                                                                            | Completed | Multiple Myeloma Plasma Cell Leukemia                               | Drug: ARRY-520, KSP(Eg5) inhibitor; intravenous Drug: Filgrastim, granulocyte-colony stimulating factor (G-CSF); subcutaneous Drug: Dexamethasone, steroid; oral                                               | Establish the maximum tolerated dose (MTD) of study drug, with and without G-CSF. Assess the efficacy of the study drug, with and without dexamethasone, in terms of response rate. Characterize the safety profile of the study drug in combination with dexamethasone in terms of adverse events, clinical laboratory tests and electrocardiograms. Characterize the pharmacokinetics of the study drug. Assess the efficacy of the study drug in terms of response rate, duration of response, progression-free survival, treatment-free survival and time to next treatment. Characterize the safety profile of the study drug in terms of adverse events, clinical laboratory tests and electrocardiograms. Assess the efficacy of the study drug, with and without dexamethasone, in terms of duration of response, progression-free survival, treatment-free survival. | Phase 1 Phase 2 | 55  | Jan-09     | 19-May-16      |
| G-CSF | NCT00005087 | Paclitaxel, Cisplatin, and Filgrastim Combined With Radiation Therapy in Treating Patients With Locally Recurrent Head and Neck Cancer                                                                                                  | Completed | Head and Neck Cancer                                                | Biological: filgrastim Drug: cisplatin Drug: paclitaxel Procedure: conventional surgery Radiation: radiation therapy                                                                                           | Overall Survival Disease-free Survival Grade 4-5 toxicity Pattern of failure (local-regional, distant, new primary, death)                                                                                                                                                                                                                                                                                                                                                                                                                                                                                                                                                                                                                                                                                                                                                    | Phase 2         | 105 | Mar-00     | 17-Nov-15      |
| G-CSF | NCT01019850 | N2007-03: Vorinostat and 131-I MIBG in Treating Patients With Resistant or Relapsed Neuroblastoma                                                                                                                                       | Completed | Neuroblastoma                                                       | Drug: Vorinostat Radiation: 131-I Metaiodobenzylguanidine Procedure: Peripheral Blood Stem Cell Infusion Drug: Filgrastim                                                                                      | All toxicities, including dose limiting toxicities, of the combination of vorinostat with therapeutic doses of 131-I MIBG Response evaluation, within the context of a phase I study. Histone acetylation levels and norepinephrine transported mRNA levels in peripheral blood mononuclear cells after treatment with different doses of vorinostat.                                                                                                                                                                                                                                                                                                                                                                                                                                                                                                                         | Phase 1         | 27  | Mar-10     | 14-Dec-15      |
| G-CSF | NCT00590785 | Phase III Comparison of Adjuvant Chemotherapy W/High-Dose Cyclophosphamide Plus Doxorubicin (AC) vs Sequential Doxorubicin Fol by Cyclophosphamide (A-C) in High Risk Breast Cancer Patients With 0-3 Positive Nodes (Intergroup, CALGB | Completed | High Risk Breast Cancer Positive Nodes Cyclophosphamide Doxorubicin | Drug: Doxorubicin Drug: Cyclophosphamide Drug: G-CSF Drug: tamoxifen Drug: ciprofloxacin                                                                                                                       | To compare disease-free survival (DFS), overall survival (s), and toxicity of high-risk primary breast cancer patients with negative axillary lymph nodes or with one to three positive nodes. To obtain tumor tissue for biologic studies. The details of these biologic studies will be described in a companion protocol or protocols to be developed through the Intergroup mechanism.                                                                                                                                                                                                                                                                                                                                                                                                                                                                                    | Phase 3         | 60  | 13-Aug-96  | 25-Aug-17      |
| G-CSF | NCT02527746 | Study of F-627 in Women With Breast Cancer Receiving Myelotoxic Chemotherapy                                                                                                                                                            | Completed | Neutropenia Breast Cancer                                           | Biological: F-627 Drug: EC regimen                                                                                                                                                                             | Number of participants with adverse events as measure of safety and tolerability of F-627 in female patients with breast cancer receiving adjuvant chemotherapy. Maximum Plasma Concentration as a measure of pharmacokinetics profile of F-627. Area Under the Curve as a measure of pharmacokinetics profile of F-627. Clearance and Mean Residence Time as a measure of pharmacokinetics profile of F-627. Absolute Neutrophil Count changes over time as measure of pharmacodynamics of F-627.                                                                                                                                                                                                                                                                                                                                                                            | Phase 1 Phase 2 | 18  | Dec-12     | 19-Aug-15      |
| G-CSF | NCT01220375 | PAV-trial: Plerixafor and Chemotherapy With Vinorelbine for Stem Cell Mobilization in Patients With Myeloma                                                                                                                             | Completed | Myeloma                                                             | Drug: Vinorelbine, G-CSF, & Plerixafor Drug: Vinorelbine and Plerixafor Drug: G-CSF and Plerixafor Drug: Vinorelbine & Plerixafor on day when CD34 count is at least 15'000 CD34+ cells/ml of peripheral blood | Number of patients from whom $\geq 6$ million CD34+ peripheral blood stem cells/kg are harvested in a maximum of 2 days Incidence and severity of adverse events during and after the use of plerixafor Proportion of patients with engraftment of PBPC defined as an ANC recovery of $\geq 0.5 \times 10^9/L$ for 3 consecutive days and a platelet recovery of $\geq 20 \times 10^9/L$ in the absence of platelet transfusion for at least 7 days Comparison of costs for mobilization of PBPC with vinorelbine and plerixafor versus the costs for mobilization with vinorelbine and filgrastim and versus the costs for mobilization with vinorelbine and                                                                                                                                                                                                                 | Phase 2         | 44  | April 2010 | April 2014     |
| G-CSF | NCT00003178 | Chemotherapy in Treating Children With Recurrent Acute Myeloid                                                                                                                                                                          | Completed | Leukemia                                                            | Biological: filgrastim Drug: cladribine Drug: idarubicin                                                                                                                                                       | Event Free Survival                                                                                                                                                                                                                                                                                                                                                                                                                                                                                                                                                                                                                                                                                                                                                                                                                                                           | Phase 2         | 120 | Mar-98     | 25-Jul-14      |
| G-CSF | NCT01435343 | Treatment of Relapsed or Refractory Acute Myeloblastic Leukemia                                                                                                                                                                         | Completed | Acute Myeloblastic Leukemia                                         | Drug: fludarabine Drug: Idarubicin Drug: cytarabine Drug: G-CSF Drug: plerixafor                                                                                                                               | Efficacy in terms of number of complete responses Safety in terms of percentages of adverse events presented                                                                                                                                                                                                                                                                                                                                                                                                                                                                                                                                                                                                                                                                                                                                                                  | Phase 1 Phase 2 | 55  | Jul-12     | April 25, 2017 |
| G-CSF | NCT01455272 | New Therapy for Advanced Stage Leukemia After Stem Cell                                                                                                                                                                                 | Completed | Leukemia                                                            | Procedure: prophylactic GPBPCI                                                                                                                                                                                 | relapse rate survival probability                                                                                                                                                                                                                                                                                                                                                                                                                                                                                                                                                                                                                                                                                                                                                                                                                                             | Not Applicabl   | 100 | Jul-09     | April 7, 2015  |
| G-CSF | NCT00004066 | Gemcitabine, Docetaxel, and Filgrastim in Treating Patients With Recurrent or Persistent Leiomyosarcoma or Soft Tissue                                                                                                                  | Completed | Ovarian Cancer Sarcoma Small Intestine Cancer                       | Biological: filgrastim Drug: docetaxel Drug: gemcitabine hydrochloride                                                                                                                                         |                                                                                                                                                                                                                                                                                                                                                                                                                                                                                                                                                                                                                                                                                                                                                                                                                                                                               | Phase 2         | 82  | Jun-99     | 7-Mar-13       |
| G-CSF | NCT00073931 | Iodine I 131 Tositumomab Followed by Autologous Stem Cell Transplantation in Treating Older Patients With Relapsed or Refractory Non-Hodgkin's Lymphoma                                                                                 | Completed | Lymphoma                                                            | Biological: filgrastim Biological: sargramostim Procedure: autologous bone marrow transplantation Procedure: peripheral blood stem cell transplantation Radiation: tositumomab and                             | Disease-free survival measured continuously                                                                                                                                                                                                                                                                                                                                                                                                                                                                                                                                                                                                                                                                                                                                                                                                                                   | Phase 2         | 25  | Oct-99     | 5-Feb-15       |
| G-CSF | NCT02805153 | PEG-rhG-CSF in Patients With Breast Cancer Receiving Chemotherapy                                                                                                                                                                       | Completed | Breast Cancer                                                       | Drug: PEG-rhG-CSF Drug: rhG-CSF                                                                                                                                                                                | the occurrence rate of grade IV neutropenia during the first chemotherapy cycle the non-occurrence rate of grade IV neutropenia (ANC < $0.5 \times 10^9/L$ ) during the next three consecutive cycles chemotherapy(except the first chemotherapy cycle) the duration of grade IV neutropenia (ANC < $0.5 \times 10^9/L$ ) during the next three consecutive cycles                                                                                                                                                                                                                                                                                                                                                                                                                                                                                                            | Phase 4         | 215 | April 2013 | 20-Jun-16      |
| G-CSF | NCT00002825 | Docetaxel in Treating Children With Recurrent Solid Tumors                                                                                                                                                                              | Completed | Brain and Central Nervous System Tumors Neuroblastoma Sarcoma       | Biological: filgrastim Drug: docetaxel                                                                                                                                                                         |                                                                                                                                                                                                                                                                                                                                                                                                                                                                                                                                                                                                                                                                                                                                                                                                                                                                               | Phase 2         | 20  | Jan-97     | 5-Feb-13       |

|       |             |                                                                                                                                                                       |           |                                                                                                                                                                                    |                                                                                                                                                                                                                           |                                                                                                                                                                                                                                                                                    |                 |     |          |               |
|-------|-------------|-----------------------------------------------------------------------------------------------------------------------------------------------------------------------|-----------|------------------------------------------------------------------------------------------------------------------------------------------------------------------------------------|---------------------------------------------------------------------------------------------------------------------------------------------------------------------------------------------------------------------------|------------------------------------------------------------------------------------------------------------------------------------------------------------------------------------------------------------------------------------------------------------------------------------|-----------------|-----|----------|---------------|
| G-CSF | NCT00002768 | Chemotherapy Plus Peripheral Stem Cell Transplantation in Treating Patients With Acute Myeloid Leukemia in Second Remission                                           | Completed | Leukemia                                                                                                                                                                           | Biological: filgrastim Drug: busulfan Drug: cytarabine Drug: etoposide Drug: methotrexate Procedure: peripheral blood stem cell transplantation                                                                           | Disease free survival                                                                                                                                                                                                                                                              | Phase 2         | 51  | Jun-96   | 28-Jun-16     |
| G-CSF | NCT00002635 | Aminocamptothecin in Treating Patients With T-cell Lymphoma                                                                                                           | Completed | Lymphoma                                                                                                                                                                           | Biological: filgrastim Drug: aminocamptothecin                                                                                                                                                                            |                                                                                                                                                                                                                                                                                    | Phase 2         | 12  | May-95   | 26-Jul-13     |
| G-CSF | NCT00067639 | Pegfilgrastim (Neulasta) for Stem Cell Mobilization in Patients With Multiple Myeloma                                                                                 | Completed | Multiple Myeloma                                                                                                                                                                   | Drug: Pegfilgrastim (Neulasta) Procedure: Apheresis                                                                                                                                                                       | Efficacy of pegfilgrastim in mobilizing progenitor cells                                                                                                                                                                                                                           | Phase 2         | 50  | Dec-03   | 1-Aug-12      |
| G-CSF | NCT00025545 | Filgrastim-Treated Donor Peripheral Stem Cell Transplantation in Treating Patients With Acute Leukemia</p>                                                            | Completed | Leukemia                                                                                                                                                                           | Drug: cyclophosphamide Drug: methotrexate Procedure: peripheral blood stem cell transplantation Radiation:                                                                                                                |                                                                                                                                                                                                                                                                                    | Phase 2         |     | Mar-96   | 13-May-10     |
| G-CSF | NCT00005785 | Stem Cell (Modified Bone Marrow) Transplantation in HIV-Infected Patients With Blood Cancer                                                                           | Completed | Hematologic Neoplasm HIV Infection                                                                                                                                                 | Drug: G-CSF Mobilized Allogeneic PBSC Cultured w/Cytokines; Transduced w/RV                                                                                                                                               |                                                                                                                                                                                                                                                                                    | Phase 1         | 30  | Sep-99   | 4-Mar-08      |
| G-CSF | NCT00002814 | Combination Chemotherapy for Patients With Brain Cancer                                                                                                               | Completed | Brain and Central Nervous System Tumors                                                                                                                                            | Biological: filgrastim Drug: paclitaxel Drug: topotecan hydrochloride                                                                                                                                                     |                                                                                                                                                                                                                                                                                    | Phase 2         | 20  | Aug-96   | 27-Oct-11     |
| G-CSF | NCT00004215 | Leridistim Compared With Filgrastim in Treating Older Patients With Acute Myeloid Leukemia                                                                            | Completed | Anemia Leukemia Neutropenia Thrombocytopenia                                                                                                                                       | Biological: filgrastim Biological: leridistim Drug: cytarabine Drug: daunorubicin hydrochloride                                                                                                                           |                                                                                                                                                                                                                                                                                    | Phase 2         |     | Aug-99   | 19-Jun-13     |
| G-CSF | NCT00636909 | Nonmyeloablative Allo SCT for the Treatment of Hematologic Disorders                                                                                                  | Completed | AML ALL CML Chronic Phase, Accelerated Phase, or Blast Crisis CLL MDS RELAPSED NON-HODGKIN'S OR HODGKIN'S LYMPHOMA APLASTIC ANEMIA MULTIPLE MYELOMA MYELOPROLIFERATIVE DISORDER (F | Drug: Cyclophosphamide Drug: fludarabine Drug: cyclosporine Drug: methotrexate Biological: G-CSF                                                                                                                          | durable engraftment hematopoietic reconstitution evaluate the patterns of post-transplant chimerism among lymphoid and antigen presenting cells disease free survival and overall survival incidence of treatment related toxicity and acute and chronic graft versus host disease | Phase 2         | 25  | Jul-99   | April 6, 2017 |
| G-CSF | NCT00002719 | Combination Chemotherapy With or Without G-CSF in Treating Older Patients With Acute Myeloid Leukemia                                                                 | Completed | Leukemia Neutropenia                                                                                                                                                               | Biological: filgrastim Drug: amsacrine Drug: carmustine Drug: cytarabine Drug: etoposide Drug: idarubicin Drug: mitoxantrone hydrochloride Procedure: peripheral blood stem cell transplantation                          |                                                                                                                                                                                                                                                                                    | Phase 3         | 500 | Dec-95   | 2-Jul-12      |
| G-CSF | NCT00004899 | Chemotherapy Plus Bone Marrow Transplantation and Filgrastim in Treating Patients With Acute Myelogenous Leukemia or                                                  | Completed | Leukemia Myelodysplastic Syndromes Myelodysplastic/Myeloproliferative Diseases                                                                                                     | Biological: filgrastim Drug: busulfan Drug: etoposide Procedure: autologous bone marrow transplantation                                                                                                                   |                                                                                                                                                                                                                                                                                    | Phase 2         |     | Oct-99   | 12-Jun-12     |
| G-CSF | NCT00006012 | Combination Chemotherapy and Radiation Therapy in Treating Patients With Limited-Stage Small Cell Lung Cancer                                                         | Completed | Drug/Agent Toxicity by Tissue/Organ Lung Cancer Radiation Toxicity                                                                                                                 | Biological: filgrastim Drug: amifostine trihydrate Drug: cisplatin Drug: etoposide Drug: paclitaxel Drug: topotecan hydrochloride Radiation: radiation therapy                                                            | Survival at 2 years Local progression-free survival at 2 years Overall survival Time to progression                                                                                                                                                                                | Phase 1 Phase 2 | 73  | Feb-01   | 6-Jul-16      |
| G-CSF | NCT00005964 | Comparison of Two Combination Chemotherapy Regimens in Treating Patients With Previously Untreated Aggressive Stage II, Stage III, or Stage IV Non-Hodgkin's Lymphoma | Completed | Lymphoma                                                                                                                                                                           | Biological: filgrastim Drug: cyclophosphamide Drug: doxorubicin hydrochloride Drug: etoposide Drug: prednisone Drug: vincristine sulfate                                                                                  | Response rate                                                                                                                                                                                                                                                                      | Phase 2         | 59  | May-00   | 13-Jul-16     |
| G-CSF | NCT00402558 | Alloreactive NK Cells for Allogeneic Stem Cell Transplantation for Acute Myeloid Leukemia (AML) and Myelodysplastic Syndrome (MDS)                                    | Completed | Myelodysplastic Syndrome Leukemia                                                                                                                                                  | Drug: Thymoglobulin Drug: Busulfan Drug: Fludarabine Procedure: Alloreactive NK Infusion Drug: G-CSF Drug: Tacrolimus Drug: Methotrexate Drug:                                                                            | Maximum Tolerated Dose of NK cells                                                                                                                                                                                                                                                 | Phase 1         | 15  | May-06   | 8-May-15      |
| G-CSF | NCT00008125 | Combination Chemotherapy With or Without Filgrastim in Treating Patients With Advanced Solid                                                                          | Completed | Unspecified Adult Solid Tumor, Protocol Specific                                                                                                                                   | Biological: filgrastim Drug: carboplatin Drug: docetaxel Drug: gemcitabine hydrochloride                                                                                                                                  |                                                                                                                                                                                                                                                                                    | Phase 1         | 25  | Mar-98   | 15-Jan-16     |
| G-CSF | NCT00193973 | Idarubicin Based Combined Modality Therapy in Primary CNS Lymphoma                                                                                                    | Completed | Primary Central Nervous System Lymphoma                                                                                                                                            | Drug: Idarubicin, Methotrexate, Filgrastim, intrathecal Ara-C Radiation: Radiation Therapy                                                                                                                                | To estimate the median and 2 year overall survival. Assess acute toxicity. Assess functional indices of living in patients with PCNSL. To estimate the risk of late neurotoxicity relative to results achieved in TROG 92.01.                                                      | Phase 2         | 20  | Jul-01   | 17-Feb-17     |
| G-CSF | NCT01237951 | High-Dose Gemcitabine, Busulfan and Melphalan With Hematopoietic-Cell Support for Patients With Poor-Risk Myeloma                                                     | Completed | Myeloma                                                                                                                                                                            | Drug: Palifermin Drug: Dexamethasone Drug: Gemcitabine Drug: Busulfan Drug: Melphalan Procedure: Stem Cell Transplant Drug: G-CSF                                                                                         | CR Rate of GemBuMel on Day 100                                                                                                                                                                                                                                                     | Phase 2         | 75  | 8-Nov-10 | 25-Sep-17     |
| G-CSF | NCT00857389 | Thiotepa-Clofarabine-Busulfan With Allogeneic Stem Cell Transplant for High Risk Malignancies                                                                         | Completed | Stem Cell Transplantation Leukemia Lymphoma                                                                                                                                        | Drug: Thiotepa Drug: Clofarabine Drug: Busulfan Procedure: Allogeneic Stem Cell Transplantation Drug: Thymoglobulin (ATG) Drug: G-CSF (Filgrastim) Drug: Tacrolimus Drug: Methotrexate Drug: Cyclophosphamide Drug: Mesna | Relapse-free Survival Rate                                                                                                                                                                                                                                                         | Phase 2         | 60  | 2-Mar-09 | 17-May-19     |



|       |             |                                                                                                                                                                                                     |           |                                                                                          |                                                                                                                                                                                                                                                                                                    |                                                                                                                                                                                                                                                                                                                                                                                                                                                                                                                                                                                                                     |                 |      |            |            |
|-------|-------------|-----------------------------------------------------------------------------------------------------------------------------------------------------------------------------------------------------|-----------|------------------------------------------------------------------------------------------|----------------------------------------------------------------------------------------------------------------------------------------------------------------------------------------------------------------------------------------------------------------------------------------------------|---------------------------------------------------------------------------------------------------------------------------------------------------------------------------------------------------------------------------------------------------------------------------------------------------------------------------------------------------------------------------------------------------------------------------------------------------------------------------------------------------------------------------------------------------------------------------------------------------------------------|-----------------|------|------------|------------|
| G-CSF | NCT0002461  | Combination Chemotherapy Followed by Bone Marrow or Peripheral Stem Cell Transplantation in Treating Patients With Refractory Hodgkin's Disease or Non-Hodgkin's Lymphoma                           | Completed | Lymphoma                                                                                 | Biological: filgrastim Biological: sargramostim Drug: carmustine Drug: cisplatin Drug: cyclophosphamide Drug: etoposide Procedure: autologous bone marrow transplantation Procedure: in vitro-treated bone marrow transplantation Procedure: peripheral blood stem cell transplantation Radiation: |                                                                                                                                                                                                                                                                                                                                                                                                                                                                                                                                                                                                                     | Phase 2         | 35   | April 1988 | 17-Aug-18  |
| G-CSF | NCT01161550 | Cladribine Based Induction Therapy With All-Trans Retinoic Acid and Midostaurin in Relapsed/Refractory                                                                                              | Completed | Leukemia, Myeloid, Acute                                                                 | Drug: Granulocyte colony-stimulating factor (G-CSF) Drug: Cladribine Drug: Cytarabine Drug: All-Trans Retinoic Acid                                                                                                                                                                                | Tolerability of midostaurin + ATRA given with CLAG chemotherapy Dose limiting toxicity (DLT) of midostaurin + ATRA with CLAG chemotherapy Response Survival Toxicity profile of midostaurin + ATRA Pharmacokinetics of midostaurin                                                                                                                                                                                                                                                                                                                                                                                  | Phase 1         | 11   | Nov-10     | 23-Jul-13  |
| G-CSF | NCT02387138 | A Trial Assessing Several Schedules of Oral S-1 in Combination With a Fixed Dose of Oxaliplatin and                                                                                                 | Completed | Digestive Cancer                                                                         | Drug: S-1 Drug: Irinotecan Drug: Oxaliplatin Other: G-CSF                                                                                                                                                                                                                                          | Dose limiting toxicities                                                                                                                                                                                                                                                                                                                                                                                                                                                                                                                                                                                            | Phase 1         | 24   | April 2014 | 22-Aug-19  |
| G-CSF | NCT01649635 | Study of Cabazitaxel Combined With Prednisone and Prophylaxis of Neutropenia Complications in the Treatment of Patients With Metastatic Castration-resistant Prostate Cancer                        | Completed | Prostate Cancer                                                                          | Drug: CABAZITAXEL (XRP6258) Drug: Prednisone Drug: Ciprofloxacin Drug: G-CSF (Granulocyte colony-stimulating factor)                                                                                                                                                                               | Proportion of patients with some episode of neutropenia classified as grade $\geq$ 3 Proportion of patients with episode of neutropenia grade $\geq$ 3 Rate of febrile neutropenia Rate of diarrhea grade $\geq$ 3 PSA response rate Circulating Tumor Cells Count (CTC) rate Changes from baseline in score derived from the Functional assessment of cancer therapy-prostate (FACT-P) and the Trial Outcome Index (TOI) Number of patients with adverse events                                                                                                                                                    | Phase 4         | 45   | Jul-12     | 6-Jul-16   |
| G-CSF | NCT00266136 | Biology and Treatment Strategy of AML in Its Subgroups: Multicenter Randomized Trial by the German Acute Myeloid Leukemia Cooperative Group (AMLCG)                                                 | Completed | Acute Myeloid Leukemia                                                                   | Drug: Cytarabine Drug: Thioguanine Drug: Daunorubicin Drug: Cyclophosphamide Drug: G-CSF Procedure: Autologous stem cell transplantation Procedure: Allogeneic stem                                                                                                                                | Remission rate, Remission duration, Relapse-free survival, Overall survival, Event-free survival Time and dose compliance, Realisation of SCT, Toxicity according to WHO                                                                                                                                                                                                                                                                                                                                                                                                                                            | Phase 3         | 3500 | Jun-99     | 26-Oct-12  |
| G-CSF | NCT00002674 | Combination Chemotherapy Followed by Peripheral Stem Cell Transplantation in Treating Patients With Chronic Myelogenous Leukemia                                                                    | Completed | Leukemia                                                                                 | Biological: filgrastim Drug: cytarabine Drug: etoposide Drug: hydroxyurea Drug: mitoxantrone hydrochloride Procedure: peripheral blood stem cell transplantation                                                                                                                                   |                                                                                                                                                                                                                                                                                                                                                                                                                                                                                                                                                                                                                     | Phase 2         | 30   | Oct-94     | April 2010 |
| G-CSF | NCT00002838 | Combination Chemotherapy Plus Peripheral Stem Cell Transplantation in Treating Patients With Refractory Chronic Lymphocytic Leukemia                                                                | Completed | Leukemia                                                                                 | Biological: Filgrastim (G-CSF) Drug: Cyclophosphamide Drug: Fludarabine Phosphate Procedure: Peripheral Blood Stem Cell Transplantation                                                                                                                                                            | Feasibility + Toxicity of Combination Chemotherapy Plus Peripheral Stem Cell Transplantation                                                                                                                                                                                                                                                                                                                                                                                                                                                                                                                        | Phase 1 Phase 2 | 13   | Dec-95     | 31-Jul-12  |
| G-CSF | NCT00345865 | Autologous Peripheral Stem Cell Transplant in Treating Patients With Non-Hodgkin's Lymphoma or Hodgkin's Lymphoma                                                                                   | Completed | Lymphoma                                                                                 | Drug: carmustine Drug: cyclophosphamide Drug: etoposide Procedure: peripheral blood stem cell transplantation Radiation: irradiation therapy Biological: G-CSF Drug: Cytarabine                                                                                                                    | Percentage of patients achieving complete response Prospective validation of the previously published formula used to estimate targeted collection of PBSC Immune reconstitution post-transplant in HIV-positive patients compared to HIV-negative patients Time to hematopoietic recovery after transplantation Duration of response Progression-free and overall survival                                                                                                                                                                                                                                         | Phase 2         | 421  | 24-Aug-05  | 20-Dec-19  |
| G-CSF | NCT00003619 | Combination Chemotherapy Followed By Peripheral Stem Cell Transplantation or Isotretinoin in Treating Patients With Acute Myeloid Leukemia, Myelodysplastic Syndrome, or Acute Lymphocytic Leukemia | Completed | Chronic Myeloproliferative Disorders Leukemia Myelodysplastic Syndromes Thrombocytopenia | Biological: filgrastim Dietary Supplement: vitamin E Drug: busulfan Drug: cytarabine Drug: etoposide Drug: fludarabine phosphate Drug: isotretinoin Drug: topotecan hydrochloride Procedure: bone marrow ablation with stem cell support Procedure:                                                |                                                                                                                                                                                                                                                                                                                                                                                                                                                                                                                                                                                                                     | Phase 1 Phase 2 |      | Feb-98     | 26-Jun-13  |
| G-CSF | NCT00668616 | Adjuvant Treatment of Breast Cancer With 1-3 Affected Lymph Nodes                                                                                                                                   | Completed | Breast Cancer                                                                            | Drug: Cyclophosphamide, Epirubicin, Paclitaxel Drug: Epirubicin, Paclitaxel,                                                                                                                                                                                                                       | progression-free time toxicity overall survival                                                                                                                                                                                                                                                                                                                                                                                                                                                                                                                                                                     | Phase 3         | 1034 | Mar-00     | 29-Jul-10  |
| G-CSF | NCT00007904 | Adjuvant Stage 2-3A Breast Cancer With Positive Lymph Nodes                                                                                                                                         | Completed | Breast Cancer                                                                            | Biological: filgrastim Drug: cyclophosphamide Drug: doxorubicin hydrochloride Drug: paclitaxel Drug: tamoxifen citrate Procedure: adjuvant therapy Radiation: radiation therapy                                                                                                                    | To determine the safety of administering continuous infusion paclitaxel with dose intense cyclophosphamide To determine the incidence of febrile neutropenia with the first cycle of therapy. To determine days of neutrophil counts below 500/uL on this regimen during the first treatment cycle. To evaluate dose delays and dose reductions of this regimen. To determine disease-free and overall survival of this regimen. Quality of life as assessed by Functional Assessment of Cancer Therapy-Breast (FACT-B) questionnaire Correlation of Her2/neu overexpression with disease-free and overall survival | Phase 2         | 16   | Jul-00     | 2-Oct-12   |
| G-CSF | NCT01527422 | Cyclophosphamide, Doxorubicin, Vincristine, Prednisone, Rituximab Pateinets With Aggresive NHL                                                                                                      | Completed | Lymphoma Non Hodgkin's Lymphoma                                                          | Drug: Cyclophosphamide, Doxorubicin, Vincristine and Prednisone                                                                                                                                                                                                                                    | Phase I-II Study of Dose Dense of PEG-Filgrastim and GM-CSF combined with CHOP-R                                                                                                                                                                                                                                                                                                                                                                                                                                                                                                                                    | Phase 1 Phase 2 | 60   | Jan-06     | 7-Feb-12   |

|       |             |                                                                                                                                                                                                                                                  |           |                                                                                                                |                                                                                                                                                                                                                                                                                                                                                                                                                                                                                                        |                                                                                                                                                                                                                                                                                                                                                                                                                               |                |     |            |           |
|-------|-------------|--------------------------------------------------------------------------------------------------------------------------------------------------------------------------------------------------------------------------------------------------|-----------|----------------------------------------------------------------------------------------------------------------|--------------------------------------------------------------------------------------------------------------------------------------------------------------------------------------------------------------------------------------------------------------------------------------------------------------------------------------------------------------------------------------------------------------------------------------------------------------------------------------------------------|-------------------------------------------------------------------------------------------------------------------------------------------------------------------------------------------------------------------------------------------------------------------------------------------------------------------------------------------------------------------------------------------------------------------------------|----------------|-----|------------|-----------|
| G-CSF | NCT00053196 | Donor Stem Cell Transplant in Treating Patients With Relapsed Hematologic Cancer                                                                                                                                                                 | Completed | Leukemia Lymphoma Multiple Myeloma Plasma Cell Neoplasm Myelodysplastic Syndromes Myeloproliferative Neoplasms | Biological: anti-thymocyte globulin Biological: G-CSF Drug: busulfan Drug: fludarabine phosphate Drug: methotrexate Drug: mycophenolate mofetil Drug: tacrolimus Procedure: allogeneic cell transplantation Drug: allopurinol                                                                                                                                                                                                                                                                          | Treatment-related mortality Per cent donor chimerism Disease-free survival Graft-versus-host disease incidence Response Rates                                                                                                                                                                                                                                                                                                 | Phase 2        | 82  | Dec-02     | 1-Jul-16  |
| G-CSF | NCT00001335 | New Therapeutic Strategies for Patients With Ewing's Sarcoma Family of Tumors, High Risk Rhabdomyosarcoma, and                                                                                                                                   | Completed | Ewing's Sarcoma Neuroblastoma Rhabdomyosarcoma                                                                 | Drug: ADR-529 Drug: Topotecan Drug: G-CSF                                                                                                                                                                                                                                                                                                                                                                                                                                                              |                                                                                                                                                                                                                                                                                                                                                                                                                               | Phase 2        | 90  | April 1993 | 4-Mar-08  |
| G-CSF | NCT00075634 | Decitabine, Doxorubicin, and Cyclophosphamide in Treating Children With Relapsed or Refractory Solid Tumors or Neuroblastoma                                                                                                                     | Completed | Recurrent Neuroblastoma Unspecified Childhood Solid Tumor, Protocol Specific                                   | Drug: decitabine Drug: doxorubicin hydrochloride Drug: cyclophosphamide Biological: filgrastim Biological: pegfilgrastim Other: laboratory biomarker analysis Other:                                                                                                                                                                                                                                                                                                                                   | MTD of decitabine, based on incidence of DLT graded according to NCI CTCAE version 3.0 (Part A) Caspase-8 expression in bone marrow or tumor biopsy samples (Part B) Objective response rate Percent of apoptotic cells as assessed by a TUNEL assay                                                                                                                                                                          | Phase 1        | 21  | Dec-03     | 30-Sep-13 |
| G-CSF | NCT01723657 | Risk Adapted Treatment for Primary Acute Myeloid Leukemia (AML)                                                                                                                                                                                  | Completed | Leukemia, Myelocytic, Acute                                                                                    | Drug: Ara-C Other: Autologous peripheral blood stem cell transplantation. Other: Allogeneic matched related or unrelated donor transplant. Drug: G-CSF Other: CD34+ selection. Other: Mylotarg purging before autoloouq PBSC transplantation                                                                                                                                                                                                                                                           | Complete remission rate (CRR) Disease free survival (DFS). Toxicity in patients over 60 years old. Evaluation of minimal residual disease (MRD) by flow cytometry and/or molecular markers during and after treatment. Feasibility of post-remission treatment in patients with 60 or more years old.                                                                                                                         | Phase 2        | 862 | Oct-03     | 8-Nov-12  |
| G-CSF | NCT02167958 | Nonmyeloablative Hematopoietic Cell Transplantation (HCT) for Patients With Hematologic Malignancies Using Related, HLA-Haploidentical Donors: A Pilot Trial of Peripheral Blood Stem Cells (PBSC) as the Donor Source                           | Completed | Leukemia MDS Myelofibrosis Lymphoma                                                                            | Drug: Fludarabine Drug: Cyclophosphamide Drug: Mesna Radiation: Total Body Irradiation Other: Hematopoietic stem cell infusion Drug: Tacrolimus Drug: Mycophenolate Drug: G-CSF                                                                                                                                                                                                                                                                                                                        | Acute GvHD Chronic Graft-versus-Host Disease Nonrelapse Mortality (NRM) Relapse of Malignancy Neutrophil Recovery Primary graft failure Secondary graft failure Platelet recovery Donor Cell Engraftment Progression-free Survival Infections                                                                                                                                                                                 | Phase 1        | 28  | 11-Feb-15  | 15-Oct-19 |
| G-CSF | NCT02786719 | A Study of High Risk Induction Chemotherapy for Neuroblastoma Without Prophylactic Administration of Myeloid Growth Factors                                                                                                                      | Completed | Neuroblastoma                                                                                                  | Drug: Topotecan Drug: Cyclophosphamide Drug: Cisplatin Drug: Etoposide Drug: Vincristine Drug: Doxorubicin Drug: Sargramostim                                                                                                                                                                                                                                                                                                                                                                          | the incidence of infections in chemotherapy cycles NOT followed by hematopoietic growth factors incidence of delay in chemotherapy administration due to prolonged neutrophil recovery the number of antibiotic days and hospital days due to fever and/or infection number of platelet transfusions in in patients undergoing induction chemotherapy the response rate following induction chemotherapy without prophylactic | Not Applicable | 13  | Jun-16     | 21-Jan-20 |
| G-CSF | NCT01413178 | A Randomized Trial to Compare Busulfan + Melphalan 140 mg/m2 With Melphalan 200 mg/m2 as Preparative Regimen for Autologous Hematopoietic Stem Cell                                                                                              | Completed | Myeloma                                                                                                        | Drug: Busulfan Drug: Melphalan Other: Questionnaire Drug: G-CSF Drug: High Dose Melphalan Procedure: Stem cell transplant                                                                                                                                                                                                                                                                                                                                                                              | Progression-Free Survival (PFS) Rates of Busulfan + Melphalan (Bu-Mel) with Melphalan Alone in Participants with Multiple Myeloma (MM) Number of Participants with Complete Response (CR)                                                                                                                                                                                                                                     | Phase 3        | 205 | 30-Sep-11  | 23-May-19 |
| G-CSF | NCT00003575 | Interleukin-12 Following Chemotherapy in Treating Patients With Refractory HIV-Associated Non-Augmerosen Plus Fludarabine and Cytarabine in Treating Patients With Refractory or Relapsed Acute Myeloid Leukemia or Acute Lymphoblastic Leukemia | Completed | Lymphoma                                                                                                       | Biological: filgrastim Biological: recombinant interleukin-12 Drug: etoposide Drug: ifosfamide                                                                                                                                                                                                                                                                                                                                                                                                         |                                                                                                                                                                                                                                                                                                                                                                                                                               | Phase 2        | 40  | Jan-99     | 8-Feb-13  |
| G-CSF | NCT00004862 | Interleukin-12 Following Chemotherapy in Treating Patients With Refractory or Relapsed Acute Myeloid Leukemia or Acute Lymphoblastic Leukemia                                                                                                    | Completed | Leukemia                                                                                                       | Biological: filgrastim Biological: oblimersen sodium Drug: cytarabine Drug: fludarabine phosphate                                                                                                                                                                                                                                                                                                                                                                                                      |                                                                                                                                                                                                                                                                                                                                                                                                                               | Phase 1        | 24  | Oct-99     | 1-Feb-13  |
| G-CSF | NCT00002835 | Combination Chemotherapy in Treating Patients With Lymphoma                                                                                                                                                                                      | Completed | Lymphoma                                                                                                       | Biological: Bleomycin Sulfate (BLM) Biological: Filgrastim (G-CSF) Biological: Recombinant Interferon Alfa Drug: Carmustine Drug: Cisplatin (CDDP) Drug: Cyclophosphamide Drug: Cytarabine (ARA-C) Drug: Etoposide (VP-16) Drug: Idarubicin Drug: Ifosfamide Drug: Leucovorin Calcium Drug: Melphalan Drug: Methotrexate Drug: Methylprednisolone Drug: mitoxantrone hydrochloride (DHAD) Drug: Vincristine Sulfate Procedure: Peripheral Blood Stem Cell Transplantation Radiation: Radiation Therapy | Efficacy of Early Intensification vs. Alternating Triple Chemotherapy                                                                                                                                                                                                                                                                                                                                                         | Phase 3        | 116 | 30-Oct-95  | 15-Nov-18 |

|       |             |                                                                                                                                                    |           |                                                                                                                                                                                                                                                                                                                                                                                        |                                                                                                                                                                                                                                                                       |                                                                                                                                                                                                                                                                                                                                                                                                                                                                                                                                                                                                                     |               |      |        |                |
|-------|-------------|----------------------------------------------------------------------------------------------------------------------------------------------------|-----------|----------------------------------------------------------------------------------------------------------------------------------------------------------------------------------------------------------------------------------------------------------------------------------------------------------------------------------------------------------------------------------------|-----------------------------------------------------------------------------------------------------------------------------------------------------------------------------------------------------------------------------------------------------------------------|---------------------------------------------------------------------------------------------------------------------------------------------------------------------------------------------------------------------------------------------------------------------------------------------------------------------------------------------------------------------------------------------------------------------------------------------------------------------------------------------------------------------------------------------------------------------------------------------------------------------|---------------|------|--------|----------------|
| G-CSF | NCT00299780 | Safety Study of Parathyroid Hormone in Patients Needing Additional Stem Cell Mobilization.                                                         | Completed | Lymphoma Multiple Myeloma Acute Myelogenous Leukemia                                                                                                                                                                                                                                                                                                                                   | Drug: Stem cell mobilization                                                                                                                                                                                                                                          | To assess safety of parathyroid hormone in combination with G-CSF when used as a mobilization agent at four different dosing levels. To evaluate the peripheral blood CD34+ count after second mobilization. To evaluate CD34+ cells/kg from apheresis after second mobilization. To evaluate the percent of patients for whom adequate numbers of CD34+ cells are obtained. To evaluate transfusion support. To evaluate the days to neutrophil engraftment (ANC >500) post autologous transplant. To evaluate the days to platelet                                                                                | Phase 1       | 12   | Jul-04 | April 24, 2007 |
| G-CSF | NCT02331706 | IFN-DLI for Relapsed Acute Leukemia After Allo-SCT                                                                                                 | Completed | Leukemia                                                                                                                                                                                                                                                                                                                                                                               | Drug: Interferon alpha-2B (IFN-α) 3 million units (MU) subcutaneous daily                                                                                                                                                                                             | Number of Adverse Events overall survival disease-free survival                                                                                                                                                                                                                                                                                                                                                                                                                                                                                                                                                     | Early Phase 1 | 16   | Dec-14 | 22-Aug-18      |
| G-CSF | NCT00002888 | Combination Chemotherapy in Treating Patients With Advanced Head and Neck Cancer                                                                   | Completed | Head and Neck Cancer                                                                                                                                                                                                                                                                                                                                                                   | Drug: cisplatin Drug: fluorouracil Drug: paclitaxel                                                                                                                                                                                                                   |                                                                                                                                                                                                                                                                                                                                                                                                                                                                                                                                                                                                                     | Phase 3       |      | Mar-97 | 21-Jun-13      |
| G-CSF | NCT01048034 | Evaluation of Azacitidine in Transfusion Dependent Patients With Low-risk Myelodysplastic Syndrome (MDS) or Chronic Myelomonocytic Leukemia (CMML) | Completed | Myelodysplastic Syndrome Chronic Myelomonocytic Leukemia                                                                                                                                                                                                                                                                                                                               | Drug: Azacitidine Drug: Erythropoetin                                                                                                                                                                                                                                 | Hemoglobin level Number of patients reaching transfusion independency after treatment with Azacitidine Effect on leucocyte, platelet count Effect on bone marrow morphology and cytogenetics Number of patients reaching transfusion independency after treatment with Azacitidine and Epo Effect on genetic and epigenetic profile                                                                                                                                                                                                                                                                                 | Phase 2       | 30   | Jan-10 | 29-Oct-13      |
| G-CSF | NCT00004192 | Colony-Stimulating Factors to Relieve Neutropenia in Patients With Recurrent Non-Hodgkin's Lymphoma                                                | Completed | Lymphoma Neutropenia                                                                                                                                                                                                                                                                                                                                                                   | Biological: filgrastim Biological: pegfilgrastim Drug: cisplatin Drug: cytarabine Drug: etoposide Drug: methylprednisolone                                                                                                                                            |                                                                                                                                                                                                                                                                                                                                                                                                                                                                                                                                                                                                                     | Phase 2       | 60   | May-00 | 17-Jan-18      |
| G-CSF | NCT00003958 | Combination Chemotherapy in Treating Patients With Previously Untreated Rhabdomyosarcoma                                                           | Completed | Adult Malignant Mesenchymoma Adult Rhabdomyosarcoma Alveolar Childhood Rhabdomyosarcoma Childhood Malignant Mesenchymoma Embryonal Childhood Rhabdomyosarcoma Embryonal-botryoid Childhood Rhabdomyosarcoma Nonmetastatic Childhood Soft Tissue Sarcoma Previously Untreated Childhood Rhabdomyosarcoma Stage I Adult Soft Tissue Sarcoma Stage II Adult Soft Tissue Sarcoma Stage III | Biological: dactinomycin Drug: vincristine sulfate Drug: cyclophosphamide Procedure: therapeutic conventional surgery Radiation: radiation therapy Drug: topotecan hydrochloride Biological: filgrastim Biological: sargramostim Other: laboratory biomarker analysis | Long-term failure-free survival (FFS) between the two treatment groups Overall survival between treatments Rate of second look surgery Proportion of patients rendered tumor-free or with microscopic tumor only Estimation of the rate of local failure for the patients who undergo second look surgery                                                                                                                                                                                                                                                                                                           | Phase 3       | 702  | Sep-02 | 17-Jun-13      |
| G-CSF | NCT00003141 | Chemotherapy Plus Peripheral Stem Cell Transplantation in Treating Infants With Malignant Brain or Spinal Cord Tumors                              | Completed | Brain Tumors Central Nervous System Tumors Neuroblastoma Sarcoma                                                                                                                                                                                                                                                                                                                       | Biological: filgrastim Drug: carboplatin Drug: cisplatin Drug: cyclophosphamide Drug: etoposide Drug: thiotepa Drug: vincristine sulfate Procedure: conventional surgery Procedure: peripheral blood stem cell transplantation                                        | Feasibility Maximal tolerated dose of thiotepa for consolidation therapy Overall rates of significant toxicities including grade IV ototoxicity, electrolytic wasting (grade IV), and hemorrhagic cystitis (grade IV) Event Free Survival                                                                                                                                                                                                                                                                                                                                                                           | Phase 1       | 94   | Mar-98 | 28-Mar-14      |
| G-CSF | NCT00014222 | Combination Chemotherapy With or Without Colony-stimulating Factors in Treating Women With Breast Cancer                                           | Completed | Breast Cancer                                                                                                                                                                                                                                                                                                                                                                          | Biological: epoetin alfa Biological: filgrastim Drug: cyclophosphamide Drug: doxorubicin hydrochloride Drug: epirubicin hydrochloride Drug: fluorouracil Drug:                                                                                                        | Disease free survival Overall survival Safety profile Quality of Life                                                                                                                                                                                                                                                                                                                                                                                                                                                                                                                                               | Phase 3       | 2104 | Dec-00 | 18-Mar-14      |
| G-CSF | NCT00002942 | Bone Marrow or Peripheral Stem Cell Transplantation in Treating Patients With Breast Cancer                                                        | Completed | Breast Cancer                                                                                                                                                                                                                                                                                                                                                                          | Procedure: autologous bone marrow transplantation Procedure: peripheral blood stem cell transplantation                                                                                                                                                               |                                                                                                                                                                                                                                                                                                                                                                                                                                                                                                                                                                                                                     | Phase 3       | 136  | Jun-96 | 10-Aug-18      |
| G-CSF | NCT00002789 | Bone Marrow or Peripheral Stem Cell Transplantation in Treating Patients With Chronic Myeloid Leukemia                                             | Completed | Leukemia                                                                                                                                                                                                                                                                                                                                                                               | Drug: busulfan Drug: cyclophosphamide Drug: cyclosporine Drug: methotrexate Procedure: allogeneic bone marrow transplantation Procedure: peripheral blood stem cell transplantation                                                                                   |                                                                                                                                                                                                                                                                                                                                                                                                                                                                                                                                                                                                                     | Phase 3       | 100  | May-96 | 30-Mar-10      |
| G-CSF | NCT00005835 | N99-02: Melphalan and Buthionine Sulfoximine                                                                                                       | Completed | Neuroblastoma                                                                                                                                                                                                                                                                                                                                                                          | Drug: buthionine sulfoximine Drug: melphalan Procedure: Peripheral blood stem cell infusion Other: Filgrastim                                                                                                                                                         | To determine the maximum tolerated dose(MTD) and the toxicities of Melphalan (L-PAM) escalated in the presence of Buthionine sulphoxamine (BSO) and followed by autologous stem cells rescue for pediatric patients with high-risk neuroblastoma. To determine the pharmacokinetics (PK) of BSO and L-PAM in pediatric patients. To determine the response rate of recurrent high risk neuroblastoma to BSO/LPAM within the confines of a phase I study. To determine the glutathione content of peripheral blood leucocytes in patients receiving BSO and L-PAM. To determine the number of days to ANC => 500 for | Phase 1       | 30   | Aug-01 | 30-Aug-16      |
| G-CSF | NCT00004172 | Chemotherapy, Filgrastim, and Stem Cell Transplantation With Radiation Therapy in Treating Patients With Stage III or Stage IV Breast Cancer       | Completed | Breast Cancer                                                                                                                                                                                                                                                                                                                                                                          | Biological: filgrastim Drug: carboplatin Drug: cyclophosphamide Drug: ifosfamide Drug: thiotepa Procedure: peripheral blood stem cell transplantation Radiation: radiation                                                                                            |                                                                                                                                                                                                                                                                                                                                                                                                                                                                                                                                                                                                                     | Phase 2       |      | Oct-99 | 12-Jun-12      |

|       |             |                                                                                                                                                                                                 |           |                                                                                                                                                                                                                                                             |                                                                                                                                                                                                                                                                                                                                                                                                                            |                                                                                                                                                                                                                                                                                                                    |                 |     |           |           |
|-------|-------------|-------------------------------------------------------------------------------------------------------------------------------------------------------------------------------------------------|-----------|-------------------------------------------------------------------------------------------------------------------------------------------------------------------------------------------------------------------------------------------------------------|----------------------------------------------------------------------------------------------------------------------------------------------------------------------------------------------------------------------------------------------------------------------------------------------------------------------------------------------------------------------------------------------------------------------------|--------------------------------------------------------------------------------------------------------------------------------------------------------------------------------------------------------------------------------------------------------------------------------------------------------------------|-----------------|-----|-----------|-----------|
| G-CSF | NCT00309842 | Myeloablative Umbilical Cord Blood Transplantation in Hematological Diseases                                                                                                                    | Completed | Acute Myeloid Leukemia Acute Lymphocytic Leukemia Chronic Myelogenous Leukemia Myelofibrosis MDS Refractory Anemia Chronic Lymphocytic Leukemia Prolymphocytic Leukemia Non-Hodgkin's Lymphoma Leukemia Lymphoma Multiple Myeloma Myelodysplastic Syndromes | Biological: filgrastim Drug: cyclophosphamide Drug: cyclosporine Drug: fludarabine phosphate Drug: mycophenolate mofetil Procedure: umbilical cord blood transplantation Radiation: total-body irradiation                                                                                                                                                                                                                 | Overall survival Patients Who Died Due to Transplant Chimerism Neutrophil Engraftment Platelet Engraftment Acute Graft-Versus-Host Disease Number of Patients with Chronic Graft-Versus-Host Disease                                                                                                               | Phase 2         | 213 | 28-Jul-05 | 9-Dec-19  |
| G-CSF | NCT00003573 | Etoposide Plus Radiation Therapy Followed by Combination Chemotherapy in Treating Children With Newly Diagnosed Advanced                                                                        | Completed | Brain Tumors Central Nervous System Tumors                                                                                                                                                                                                                  | Biological: filgrastim Drug: cisplatin Drug: cyclophosphamide Drug: etoposide Drug: vincristine sulfate Radiation: radiation therapy                                                                                                                                                                                                                                                                                       | Assess the efficacy of oral etoposide at 50 mg/m2/day given concurrently with radiotherapy followed with dose intensive adjuvant chemotherapy in children with newly diagnosed high stage medulloblastoma                                                                                                          | Phase 2         | 53  | Nov-98    | 25-Jul-14 |
| G-CSF | NCT00003700 | Combination Chemotherapy in Treating Patients With Untreated Acute Lymphoblastic Leukemia                                                                                                       | Completed | Leukemia                                                                                                                                                                                                                                                    | Biological: G-CSF Drug: asparaginase Drug: cyclophosphamide Drug: cytarabine Drug: daunorubicin hydrochloride Drug: leucovorin calcium Drug: mercaptopurine Drug: methotrexate Drug: prednisone Drug: vincristine sulfate Drug: Allopurinol                                                                                                                                                                                | Complete Response Toxicity CNS relapse rate                                                                                                                                                                                                                                                                        | Phase 2         | 163 | Jan-99    | 6-Jul-16  |
| G-CSF | NCT00003392 | High-Dose Chemotherapy and Peripheral Stem Cell Transplantation in Treating Patients With Recurrent or Refractory Metastatic Breast Cancer                                                      | Completed | Breast Cancer                                                                                                                                                                                                                                               | Biological: filgrastim Drug: carboplatin Drug: cyclophosphamide Drug: melphalan Drug: paclitaxel Procedure: bone marrow ablation with stem cell support Procedure: peripheral blood stem cell transplantation                                                                                                                                                                                                              |                                                                                                                                                                                                                                                                                                                    | Phase 2         | 61  | Sep-97    | 22-Feb-12 |
| G-CSF | NCT00002832 | Decitabine and Peripheral Stem Cell Transplantation in Treating Patients Who Have Relapsed Following Bone Marrow Transplantation for Leukemia, Myelodysplastic Syndrome, or Chronic Myelogenous | Completed | Leukemia Myelodysplastic Syndromes                                                                                                                                                                                                                          | Biological: Filgrastim Drug: Cyclosporine Drug: Decitabine Procedure: Allogeneic Bone Marrow Transplantation Procedure: Peripheral Blood Stem Cell Transplantation                                                                                                                                                                                                                                                         | Maximum Tolerated Dose (MTD) Decitabine                                                                                                                                                                                                                                                                            | Phase 1 Phase 2 | 14  | Aug-95    | 30-Jul-12 |
| G-CSF | NCT00005863 | Combination Chemotherapy With or Without Filgrastim and/or Tretinoin in Treating Patients With Acute Myeloid Leukemia                                                                           | Completed | Leukemia Myelodysplastic Syndromes Myelodysplastic/Myeloproliferative Neoplasms                                                                                                                                                                             | Biological: filgrastim Drug: cytarabine Drug: daunorubicin hydrochloride Drug: etoposide Drug: fludarabine phosphate Drug: tretinoin                                                                                                                                                                                                                                                                                       |                                                                                                                                                                                                                                                                                                                    | Phase 3         |     | Aug-98    | 19-Dec-13 |
| G-CSF | NCT00004010 | Combination Chemotherapy and Radiation Therapy in Treating Children With Previously Untreated Stage II, Stage III, or Stage IV Hodgkin's Disease                                                | Completed | Lymphoma                                                                                                                                                                                                                                                    | Biological: bleomycin sulfate Biological: filgrastim Drug: ABVD regimen Drug: cyclophosphamide Drug: dacarbazine Drug: doxorubicin hydrochloride Drug: etoposide Drug: prednisone Drug: procarbazine hydrochloride Drug: vinblastine                                                                                                                                                                                       | Estimate the rate of BEACOPP ((Bleomycin, Etoposide, Adriamycin, Cyclophosphamide, Vincristine, Procarbazine, Prednisone) specific toxicity in pediatric patients Obtain preliminary estimates of response to BEACOPP ((Bleomycin, Etoposide, Adriamycin, Cyclophosphamide, Vincristine, Procarbazine, Prednisone) | Phase 2         | 99  | Oct-99    | 26-Feb-14 |
| G-CSF | NCT00027937 | Combination Chemotherapy, Peripheral Stem Cell Transplantation, and Biological Therapy in Treating Patients With Solid Tumors or Lymphoma                                                       | Completed | Lymphoma Unspecified Adult Solid Tumor, Protocol Specific Unspecified Childhood Solid Tumor, Protocol Specific                                                                                                                                              | Biological: aldesleukin Biological: filgrastim Biological: sargramostim Drug: busulfan Drug: cyclophosphamide Drug: melphalan Drug: paclitaxel Drug: thiotepa Procedure: bone marrow ablation with stem cell support Procedure: in vitro-treated peripheral blood stem cell                                                                                                                                                |                                                                                                                                                                                                                                                                                                                    | Phase 2         |     | Aug-01    | 14-May-10 |
| G-CSF | NCT00002805 | Combination Chemotherapy in Treating Patients With Acute Myeloid Leukemia or Myelodysplastic Syndrome                                                                                           | Completed | Leukemia                                                                                                                                                                                                                                                    | Biological: filgrastim Drug: cladribine Drug: cytarabine Drug: etoposide Drug: methotrexate Drug: mitoxantrone hydrochloride Drug: therapeutic hydrocortisone Procedure: allogeneic bone marrow transplantation Procedure: autologous bone marrow transplantation Procedure: peripheral blood stem cell transplantation Radiation: low-LET cobalt-60 gamma ray therapy Radiation: low-LET electron therapy Radiation: low- | Estimate second remission rate and survival rate Evaluate the mortality of the start of VP-16/Ara-C intensification Compare outcomes by the ethnicity and gender                                                                                                                                                   | Phase 2         | 115 | Aug-97    | 24-Jul-14 |

|       |             |                                                                                                                                                                                                        |           |                                                                                                       |                                                                                                                                                                                                                                                                                                                                                                                           |                                                                                                                                                                                                                                                                                                                                                                              |                 |     |            |                |
|-------|-------------|--------------------------------------------------------------------------------------------------------------------------------------------------------------------------------------------------------|-----------|-------------------------------------------------------------------------------------------------------|-------------------------------------------------------------------------------------------------------------------------------------------------------------------------------------------------------------------------------------------------------------------------------------------------------------------------------------------------------------------------------------------|------------------------------------------------------------------------------------------------------------------------------------------------------------------------------------------------------------------------------------------------------------------------------------------------------------------------------------------------------------------------------|-----------------|-----|------------|----------------|
| G-CSF | NCT0004188  | Combination Chemotherapy and Peripheral Stem Cell Transplantation in Treating Patients With Neuroblastoma                                                                                              | Completed | Neuroblastoma                                                                                         | Biological: filgrastim Drug: carboplatin Drug: cisplatin Drug: cyclophosphamide Drug: doxorubicin hydrochloride Drug: etoposide Drug: isotretinoin Drug: melphalan Drug: topotecan hydrochloride Drug: vincristine sulfate Procedure: autologous bone marrow transplantation Procedure: bone marrow ablation with stem cell support Procedure: conventional surgery Procedure: peripheral | Event-free survival rate Rate of occurrence of toxic (non disease-related) deaths where a toxic death will be "counted" if it occurs prior to the initiation of the immunotherapy Time to engraftment CD34 content Tumor content as measured by reverse transcriptase polymerase chain reaction                                                                              | Phase 3         | 495 | Feb-01     | 17-May-13      |
| G-CSF | NCT0005985  | Filgrastim and Chemotherapy Followed by Peripheral Stem Cell Transplant in Treating Patients With Hodgkin's Lymphoma or Non-Hodgkin's Lymphoma                                                         | Completed | Lymphoma                                                                                              | Biological: filgrastim Drug: carmustine Drug: cyclophosphamide Drug: cytarabine Drug: dexamethasone Drug: etoposide Drug: mitoxantrone hydrochloride Procedure: peripheral blood stem cell transplantation Radiation: radiation therapy                                                                                                                                                   | Disease-free survival at 2 years Relapse or progression transplant related mortality at 1½ years                                                                                                                                                                                                                                                                             | Phase 2         | 213 | Aug-00     | 29-Nov-17      |
| G-CSF | NCT02130869 | A Pilot Study of Immunotherapy Including Haploidentical NK Cell Infusion Following CD133+ Positively-Selected Autologous Hematopoietic Stem Cells in Children With High Risk Solid Tumors or Lymphomas | Completed | Neuroblastoma Lymphoma High-risk Tumor                                                                | Biological: CD133+ selected autologous stem cell infusion Biological: IL-2 Biological: hu14.18K322A Drug: Busulfan Drug: Melphalan Biological: GM-CSF Drug: Bendamustine Drug: Etoposide Drug: Cytarabine Drug: Carboplatin Device: Haploidentical natural killer cell infusion Biological: G-CSF Drug: Etoposide phosphate Device: ClineMACS                                             | Percent of participants with positive ANC engraftment Overall survival Disease-free survival Incidence of relapse Lymphocyte and hematopoietic reconstitution Characteristics of the stem cell grafts Characteristics of the natural killer cell grafts. Overall survival of patients treated without stem cell manipulation or NK cell infusion due to off therapy criteria | Phase 1         | 8   | 10-Oct-14  | 22-Dec-17      |
| G-CSF | NCT0003136  | Combination Chemotherapy and Peripheral Stem Cell Transplantation in Treating Patients With Epithelial Ovarian Cancer or Primary                                                                       | Completed | Ovarian Cancer Primary Peritoneal Cavity Cancer                                                       | Biological: filgrastim Drug: amifostine trihydrate Drug: carboplatin Drug: cyclophosphamide Procedure: peripheral blood stem cell transplantation                                                                                                                                                                                                                                         | Maximum tolerated dose                                                                                                                                                                                                                                                                                                                                                       | Phase 1 Phase 2 | 11  | Dec-96     | 11-Feb-13      |
| G-CSF | NCT00293319 | 131 I-MIBG in Treating Patients With Refractory or Relapsed                                                                                                                                            | Completed | Neuroblastoma                                                                                         | Biological: filgrastim Radiation: iobenguane I 131                                                                                                                                                                                                                                                                                                                                        | Ability of iodine I 131 metaiodobenzylguanidine to provide palliative therapy Acute and late toxicities Disease and symptom responses                                                                                                                                                                                                                                        | Phase 2         | 164 | April 2005 | 18-Aug-14      |
| G-CSF | NCT0004212  | DX-8951f in Treating Children With Advanced Solid Tumors or Lymphomas                                                                                                                                  | Completed | Brain and Central Nervous System Tumors Lymphoma Unspecified Childhood Solid Tumor, Protocol Specific | Biological: filgrastim Drug: exatecan mesylate                                                                                                                                                                                                                                                                                                                                            |                                                                                                                                                                                                                                                                                                                                                                              | Phase 1         |     | Sep-99     | 16-May-12      |
| G-CSF | NCT00020371 | BMS-247550 in Treating Patients With Cancers That Have Not Responded to Previous Therapy                                                                                                               | Completed | Unspecified Adult Solid Tumor, Protocol Specific Neutropenia                                          | Drug: BMS-247550 Drug: filgrastim                                                                                                                                                                                                                                                                                                                                                         |                                                                                                                                                                                                                                                                                                                                                                              | Phase 1         |     | Sep-00     | April 28, 2015 |
| G-CSF | NCT00006734 | Comparison of Combination Chemotherapy Regimens in Treating Patients With Ewing's Sarcoma or Neuroectodermal Tumor                                                                                     | Completed | Sarcoma                                                                                               | Biological: filgrastim Drug: cyclophosphamide Drug: doxorubicin hydrochloride Drug: etoposide Drug: ifosfamide Drug: vincristine sulfate Procedure: adjuvant therapy Procedure: conventional surgery Procedure: neoadjuvant therapy Radiation:                                                                                                                                            | Event-free survival                                                                                                                                                                                                                                                                                                                                                          | Phase 3         | 587 | May-01     | 17-May-13      |
| G-CSF | NCT00066482 | Combination Chemotherapy in Treating Children With Newly Diagnosed Malignant Germ Cell Tumors                                                                                                          | Completed | Childhood Germ Cell Tumor Extragenital Germ Cell Tumor                                                | Biological: bleomycin sulfate Biological: filgrastim Drug: cisplatin Drug: cyclophosphamide Drug: etoposide Procedure: conventional                                                                                                                                                                                                                                                       | Feasibility of adding cyclophosphamide to a PEB backbone Maximum tolerated dose Estimate the response rate                                                                                                                                                                                                                                                                   | Not Applicable  | 19  | Jul-04     | 17-Oct-13      |
| G-CSF | NCT00290433 | Efficacy of the HCVDDOXIL Regimen in Patients With Newly Diagnosed Peripheral T-Cell                                                                                                                   | Completed | Lymphoma                                                                                              | Drug: Cyclophosphamide Drug: Mesna Drug: Vincristine Drug: Methotrexate Drug: Ara-C Drug:                                                                                                                                                                                                                                                                                                 | Progression-Free Survival                                                                                                                                                                                                                                                                                                                                                    | Phase 2         | 55  | Sep-03     | 14-Jul-15      |
| G-CSF | NCT0003172  | Comparison of Combination Chemotherapy Regimens in Treating Patients With Advanced Stomach Cancer                                                                                                      | Completed | Gastric Cancer                                                                                        | Biological: filgrastim Biological: recombinant interferon alfa Drug: docetaxel Drug: doxorubicin hydrochloride Drug: fluorouracil Drug: hydroxyurea                                                                                                                                                                                                                                       |                                                                                                                                                                                                                                                                                                                                                                              | Phase 2         |     | Dec-97     | 21-Jun-13      |
| G-CSF | NCT00562978 | Yttrium Y 90 Ibritumomab Tiuxetan, Etoposide, Cyclophosphamide, and an Autologous Stem Cell Transplant in Treating Patients With Non-Hodgkin Lymphoma                                                  | Completed | Lymphoma                                                                                              | Biological: filgrastim Drug: cyclophosphamide Drug: etoposide Procedure: autologous hematopoietic stem cell transplantation Procedure: peripheral blood stem cell transplantation Radiation: yttrium                                                                                                                                                                                      | Response Toxicity Duration of response (phase II) Overall survival (phase II) Disease-free survival (phase II)                                                                                                                                                                                                                                                               | Phase 1 Phase 2 | 54  | Sep-99     | 1-Jun-18       |

|       |             |                                                                                                                                                                                         |           |                                                                                                                                                                                                                                                                                                                                                  |                                                                                                                                                                                                                                     |                                                                                                                                                                                                                                                                                                                            |         |     |           |           |
|-------|-------------|-----------------------------------------------------------------------------------------------------------------------------------------------------------------------------------------|-----------|--------------------------------------------------------------------------------------------------------------------------------------------------------------------------------------------------------------------------------------------------------------------------------------------------------------------------------------------------|-------------------------------------------------------------------------------------------------------------------------------------------------------------------------------------------------------------------------------------|----------------------------------------------------------------------------------------------------------------------------------------------------------------------------------------------------------------------------------------------------------------------------------------------------------------------------|---------|-----|-----------|-----------|
| G-CSF | NCT0006241  | Peripheral Stem Cell Transplantation in Treating Patients With Relapsed Low- or Intermediate-Grade Non-Hodgkin's Lymphoma                                                               | Completed | Lymphoma                                                                                                                                                                                                                                                                                                                                         | Biological: filgrastim Drug: chemotherapy Procedure: in vitro-treated peripheral blood stem cell transplantation Procedure: peripheral blood stem cell transplantation Radiation:                                                   |                                                                                                                                                                                                                                                                                                                            | Phase 2 |     | Mar-00    | 30-Nov-11 |
| G-CSF | NCT0005578  | Combination Chemotherapy With or Without Dexrazoxane in Treating Children With Hodgkin's Disease                                                                                        | Completed | Cardiac Toxicity Lymphoma                                                                                                                                                                                                                                                                                                                        | Biological: bleomycin sulfate Biological: filgrastim Drug: cyclophosphamide Drug: dexrazoxane hydrochloride Drug: doxorubicin hydrochloride Drug: etoposide Drug: prednisone Drug: vincristine sulfate Radiation: radiation therapy | Diffusing capacity of the lungs for carbon monoxide (DLCO)                                                                                                                                                                                                                                                                 | Phase 3 | 219 | Mar-97    | 24-Jul-14 |
| G-CSF | NCT00953420 | Carboplatin and Docetaxel Followed by Epstein-Barr Virus Cytotoxic T Lymphocytes                                                                                                        | Completed | Nasopharyngeal Carcinoma                                                                                                                                                                                                                                                                                                                         | Drug: Docetaxel Drug: Carboplatin Drug: Dexamethasone Biological: EBV-specific cytotoxic T lymphocytes Biological: G-CSF or Peg-G-CSF                                                                                               | The primary endpoint of the study is to evaluate the overall response rate for patients with advanced-stage, relapsed/refractory, EBV positive nasopharyngeal carcinoma after re-induction chemotherapy and immunotherapy. Response to re-induction chemotherapy Evaluation of immune response by measuring EBV-DNA levels | Phase 2 | 20  | Nov-09    | 18-Aug-17 |
| G-CSF | NCT00880815 | Fludarabine, Bendamustine, and Rituximab in Treating Participants With Lymphoid Cancers Undergoing Stem Cell Transplant                                                                 | Completed | CD20 Positive Chronic Lymphocytic Leukemia Follicular Lymphoma Mantle Cell Lymphoma Marginal Zone Lymphoma Recurrent Diffuse Large B-Cell Lymphoma T-Cell Non-Hodgkin Lymphoma                                                                                                                                                                   | Procedure: Allogeneic Hematopoietic Stem Cell Transplantation Biological: Anti-Thymocyte Globulin Drug: Bendamustine Biological: Filgrastim Drug: Fludarabine Drug: Methotrexate Biological: Rituximab Drug: Tacrolimus             | Maximum tolerated dose of bendamustine                                                                                                                                                                                                                                                                                     | Phase 1 | 60  | 17-Feb-09 | 3-Jun-19  |
| G-CSF | NCT0003203  | Carboplatin and Vincristine Plus Radiation Therapy Followed By Adjuvant Chemotherapy in Treating Young Patients With Newly Diagnosed CNS Embryonal Tumors                               | Completed | Brain Tumors Central Nervous System Tumors Neuroblastoma                                                                                                                                                                                                                                                                                         | Biological: filgrastim Drug: carboplatin Drug: cisplatin Drug: cyclophosphamide Drug: vincristine sulfate Procedure: adjuvant therapy Radiation: radiation therapy                                                                  | Event Free Survival Survival                                                                                                                                                                                                                                                                                               | Phase 2 | 168 | Mar-98    | 23-Aug-13 |
| G-CSF | NCT0002649  | Interleukin-2 or Observation Following Radiation Therapy, Combination Chemotherapy, and Peripheral Stem Cell Transplantation in Treating Patients With Recurrent Non-Hodgkin's Lymphoma | Completed | Recurrent Adult Burkitt Lymphoma Recurrent Adult Diffuse Large Cell Lymphoma Recurrent Adult Diffuse Mixed Cell Lymphoma Recurrent Adult Diffuse Small Cleaved Cell Lymphoma Recurrent Adult Immunoblastic Large Cell Lymphoma Recurrent Grade 1 Follicular Lymphoma Recurrent Grade 2 Follicular Lymphoma Recurrent Grade 3 Follicular Lymphoma | Biological: aldesleukin Biological: filgrastim Drug: cyclophosphamide Drug: etoposide Radiation: radiation therapy Procedure: peripheral blood stem cell transplantation Procedure: bone marrow ablation with stem cell support     | Overall survival Disease-free survival Frequency and severity of toxicity associated with post-transplant aldesleukin therapy                                                                                                                                                                                              | Phase 3 | 206 | May-95    | 28-Feb-13 |
| G-CSF | NCT00004135 | Chemotherapy Plus Peripheral Stem Cell Transplantation in Treating Patients With Melanoma or Metastatic Kidney Cancer                                                                   | Completed | Kidney Cancer Melanoma (Skin)                                                                                                                                                                                                                                                                                                                    | Biological: filgrastim Biological: therapeutic allogeneic lymphocytes Drug: cyclophosphamide Drug: fludarabine phosphate Procedure: peripheral blood stem cell transplantation                                                      | Complete Response Rate                                                                                                                                                                                                                                                                                                     | Phase 2 | 19  | Feb-99    | 7-Mar-14  |
| G-CSF | NCT00003812 | Chemotherapy Plus Radiation Therapy in Treating Patients With Limited-Stage Small Cell Lung                                                                                             | Completed | Lung Cancer                                                                                                                                                                                                                                                                                                                                      | Biological: filgrastim Drug: carboplatin Drug: etoposide Drug: paclitaxel Drug: topotecan hydrochloride Radiation: radiation therapy                                                                                                | response rate overall survival                                                                                                                                                                                                                                                                                             | Phase 2 | 75  | Mar-99    | 20-Jul-16 |
| G-CSF | NCT00003657 | High-dose ICE With Amifostine                                                                                                                                                           | Completed | Bladder Cancer Brain and Central Nervous System Tumors Carcinoma of Unknown Primary Extragenital Germ Cell Tumor Head and Neck Cancer Kidney Cancer Lung Cancer Ovarian Cancer Sarcoma Testicular Germ Cell                                                                                                                                      | Biological: filgrastim Drug: Amifostine Drug: Carboplatin Drug: Etoposide Drug: Ifosfamide Procedure: peripheral blood stem cell transplantation                                                                                    | Percentage of Participants with Grade 2 or higher renal toxicities Full Pharmacokinetic profiles for ifosfamide and its metabolites MTD of ICE with amifostine                                                                                                                                                             | Phase 2 | 24  | Jul-98    | 20-Jan-17 |
| G-CSF | NCT00033696 | Combination Chemotherapy and Radiation Therapy in Treating Patients With Limited-Stage Small                                                                                            | Completed | Lung Cancer                                                                                                                                                                                                                                                                                                                                      | Biological: filgrastim Drug: carboplatin Drug: etoposide Drug: paclitaxel Drug: topotecan hydrochloride Radiation: radiation therapy                                                                                                | overall response rate failure-free survival overall survival                                                                                                                                                                                                                                                               | Phase 2 | 65  | Sep-01    | 19-Jul-16 |

|       |             |                                                                                                                                                                                                                                                   |           |                                                                                                                                                                                                                                                                                                                                                                                                                                                                                                                                                                                                                                                                                                                                                                                                                                                                                                                                                                                         |                                                                                                                                                                                                                          |                                                                                                                                                                                                                         |         |     |           |           |
|-------|-------------|---------------------------------------------------------------------------------------------------------------------------------------------------------------------------------------------------------------------------------------------------|-----------|-----------------------------------------------------------------------------------------------------------------------------------------------------------------------------------------------------------------------------------------------------------------------------------------------------------------------------------------------------------------------------------------------------------------------------------------------------------------------------------------------------------------------------------------------------------------------------------------------------------------------------------------------------------------------------------------------------------------------------------------------------------------------------------------------------------------------------------------------------------------------------------------------------------------------------------------------------------------------------------------|--------------------------------------------------------------------------------------------------------------------------------------------------------------------------------------------------------------------------|-------------------------------------------------------------------------------------------------------------------------------------------------------------------------------------------------------------------------|---------|-----|-----------|-----------|
| G-CSF | NCT00052780 | Temozolomide and O6-Benzylguanine in Treating Children With Recurrent Brain Tumors                                                                                                                                                                | Completed | Childhood Central Nervous System Germ Cell Tumor Childhood Choroid Plexus Tumor Childhood Craniopharyngioma Childhood Ependymoblastoma Childhood Grade I Meningioma Childhood Grade II Meningioma Childhood Grade III Meningioma Childhood High-grade Cerebellar Astrocytoma Childhood High-grade Cerebral Astrocytoma Childhood Infratentorial Ependymoma Childhood Low-grade Cerebellar Astrocytoma Childhood Low-grade Cerebral Astrocytoma Childhood Medulloepithelioma Childhood Mixed Glioma Childhood Oligodendroglioma Childhood Supratentorial Ependymoma Recurrent Childhood Brain Stem Glioma Recurrent Childhood Cerebellar Astrocytoma Recurrent Childhood Cerebral Astrocytoma Recurrent Childhood Ependymoma Recurrent Childhood Medulloblastoma Recurrent Childhood Pineoblastoma Recurrent Childhood Subependymal Giant Cell Astrocytoma Recurrent Childhood Supratentorial Primitive Neuroectodermal Tumor Recurrent Childhood Visual Pathway and Hypothalamic Glioma | Drug: O6-benzylguanine Drug: temozolomide Biological: filgrastim Other: pharmacological study Other: laboratory biomarker analysis                                                                                       | MTD of temozolomide Pharmacokinetic parameters Acute toxicities Chronic toxicities Histological response Duration of disease control Survival                                                                           | Phase 1 | 72  | Oct-02    | 30-Sep-13 |
| G-CSF | NCT00027573 | Chemotherapy Followed by Peripheral Stem Cell Transplantation in Treating Patients With Metastatic or Unresectable Kidney Cancer                                                                                                                  | Completed | Kidney Cancer                                                                                                                                                                                                                                                                                                                                                                                                                                                                                                                                                                                                                                                                                                                                                                                                                                                                                                                                                                           | Biological: filgrastim Biological: therapeutic allogeneic lymphocytes Drug: cyclophosphamide Drug: fludarabine phosphate Drug: methotrexate Drug: tacrolimus Procedure: peripheral blood stem cell transplantation       | Overall response rate Overall survival Disease-free survival Treatment-related mortality Percentage of donor chimerism in patients treated                                                                              | Phase 2 | 36  | Oct-01    | 14-Jul-16 |
| G-CSF | NCT00003311 | Combination Chemotherapy in Treating Patients With Newly Diagnosed Mantle Cell Lymphoma                                                                                                                                                           | Completed | Lymphoma                                                                                                                                                                                                                                                                                                                                                                                                                                                                                                                                                                                                                                                                                                                                                                                                                                                                                                                                                                                | Biological: filgrastim Drug: cyclophosphamide Drug: cytarabine Drug: dexamethasone Drug: doxorubicin hydrochloride Drug: methotrexate Drug: vincristine sulfate                                                          |                                                                                                                                                                                                                         | Phase 2 | 19  | 20-May-98 | 14-Nov-18 |
| G-CSF | NCT01985724 | Sequential Administration of FE75C and Docetaxel Versus Docetaxel/Cyclophosphamide in HER-2 Negative, Node Positive                                                                                                                               | Completed | Breast Cancer                                                                                                                                                                                                                                                                                                                                                                                                                                                                                                                                                                                                                                                                                                                                                                                                                                                                                                                                                                           | Drug: Docetaxel Drug: Epirubicin Drug: Cyclophosphamide Drug: 5-fluorouracil Drug: Granulocyte-colony stimulating growth factor                                                                                          | 3-year disease-free survival Overall survival Recurrence rate                                                                                                                                                           | Phase 3 | 650 | Oct-07    | 14-May-14 |
| G-CSF | NCT00078988 | High-Dose Chemotherapy Plus Autologous Stem Cell Transplantation Compared With Intermediate-Dose Chemotherapy Plus Autologous Stem Cell Transplantation With or Without Isotretinoin in Treating Young Patients With Recurrent High-Grade Gliomas | Completed | Brain Tumor Central Nervous System Tumor                                                                                                                                                                                                                                                                                                                                                                                                                                                                                                                                                                                                                                                                                                                                                                                                                                                                                                                                                | Biological: filgrastim Drug: carboplatin Drug: etoposide Drug: isotretinoin Drug: thiotepa Procedure: autologous bone marrow transplantation Procedure: peripheral blood stem cell transplantation                       | Event-free survival Toxic death attributable to complications of treatment in the absence of tumor progression as assessed by NCI Common Toxicity Criteria for Adverse Events (CTCAE) version 3.0 Overall survival (OS) | Phase 3 | 1   | Oct-04    | 7-May-15  |
| G-CSF | NCT00002827 | Chemotherapy Followed by Radiation Therapy in Treating Young Patients With Newly Diagnosed Hodgkin's Disease                                                                                                                                      | Completed | Cardiac Toxicity Lymphoma                                                                                                                                                                                                                                                                                                                                                                                                                                                                                                                                                                                                                                                                                                                                                                                                                                                                                                                                                               | Biological: bleomycin sulfate Biological: filgrastim Drug: dexrazoxane hydrochloride Drug: doxorubicin hydrochloride Drug: etoposide Drug: vincristine sulfate Radiation: low-LET cobalt-60 gamma ray therapy Radiation: | DLCO                                                                                                                                                                                                                    | Phase 3 | 294 | Oct-96    | 26-Aug-13 |
| G-CSF | NCT00431080 | Randomized Phase III Trial Comparing Sequential Administration of FE75C Followed by Docetaxel Versus Paclitaxel as Adjuvant Chemotherapy in Axillary Lymph                                                                                        | Completed | Breast Cancer                                                                                                                                                                                                                                                                                                                                                                                                                                                                                                                                                                                                                                                                                                                                                                                                                                                                                                                                                                           | Drug: Docetaxel Drug: Paclitaxel Drug: Epirubicin Drug: Cyclophosphamide Drug: 5-fluorouracil Drug: Granulocyte-colony stimulating growth factor                                                                         | 3-year disease-free survival Overall survival Recurrence rate Toxicity profile Quality of life between the two treatment arms                                                                                           | Phase 3 | 478 | Aug-04    | 21-Jan-08 |
| G-CSF | NCT00002641 | Surgery With or Without Chemotherapy in Treating Patients With Soft Tissue Sarcoma                                                                                                                                                                | Completed | Endometrial Cancer Kidney Cancer Ovarian Cancer Pheochromocytoma Sarcoma                                                                                                                                                                                                                                                                                                                                                                                                                                                                                                                                                                                                                                                                                                                                                                                                                                                                                                                | Biological: filgrastim Drug: doxorubicin hydrochloride Drug: ifosfamide Drug: isolated perfusion Procedure: adjuvant therapy Procedure: conventional                                                                     |                                                                                                                                                                                                                         | Phase 3 | 350 | Feb-95    | 8-Aug-14  |

|       |             |                                                                                                                                                                                                                                |           |                                                                                                                                                                                                                                                                                                                                                                        |                                                                                                                                                                                                                                                                                                                                             |                                                                                                                                                                                                                                                                                                                                                                                                                                                                                                                                                                                                                                                                                     |                 |      |            |           |
|-------|-------------|--------------------------------------------------------------------------------------------------------------------------------------------------------------------------------------------------------------------------------|-----------|------------------------------------------------------------------------------------------------------------------------------------------------------------------------------------------------------------------------------------------------------------------------------------------------------------------------------------------------------------------------|---------------------------------------------------------------------------------------------------------------------------------------------------------------------------------------------------------------------------------------------------------------------------------------------------------------------------------------------|-------------------------------------------------------------------------------------------------------------------------------------------------------------------------------------------------------------------------------------------------------------------------------------------------------------------------------------------------------------------------------------------------------------------------------------------------------------------------------------------------------------------------------------------------------------------------------------------------------------------------------------------------------------------------------------|-----------------|------|------------|-----------|
| G-CSF | NCT00003792 | Vaccine Therapy in Treating Patients With Metastatic Melanoma                                                                                                                                                                  | Completed | Melanoma (Skin)                                                                                                                                                                                                                                                                                                                                                        | Biological: MART-1 antigen Biological: filgrastim Biological: flu matrix peptide p58-66 Biological: gp100 antigen Biological: recombinant MAGE-3.1 antigen Biological: tyrosinase peptide Procedure: in vitro-treated peripheral blood stem cell                                                                                            |                                                                                                                                                                                                                                                                                                                                                                                                                                                                                                                                                                                                                                                                                     | Phase 1         |      | April 1999 | 26-Jun-13 |
| G-CSF | NCT00001750 | Comparing Treatments for Multiple Myeloma                                                                                                                                                                                      | Completed | Multiple Myeloma                                                                                                                                                                                                                                                                                                                                                       | Drug: Stemgen                                                                                                                                                                                                                                                                                                                               |                                                                                                                                                                                                                                                                                                                                                                                                                                                                                                                                                                                                                                                                                     | Phase 2         | 32   | Sep-98     | 4-Mar-08  |
| G-CSF | NCT00002837 | High-Dose Combination Chemotherapy and Peripheral Stem Cell Transplantation in Treating Patients With Breast Cancer                                                                                                            | Completed | Breast Cancer                                                                                                                                                                                                                                                                                                                                                          | Biological: Filgrastim (G-CSF) Drug: Cyclophosphamide Drug: Doxorubicin Hydrochloride Drug: Paclitaxel Procedure: Peripheral Blood Stem Cell Transplantation                                                                                                                                                                                | Maximum Tolerated Doses (MTD) of 4 courses Doxorubicin, Paclitaxel, + Cyclophosphamide followed by PBSC and G-CSF Support                                                                                                                                                                                                                                                                                                                                                                                                                                                                                                                                                           | Phase 1 Phase 2 | 21   | Sep-95     | 31-Jul-12 |
| G-CSF | NCT00575952 | Intraperitoneal Paclitaxel, Doxorubicin Hydrochloride, and Cisplatin in Treating Patients With Stage III-IV Endometrial Cancer                                                                                                 | Completed | Endometrial Adenosquamous Carcinoma Endometrial Clear Cell Adenocarcinoma Endometrial Mixed Adenocarcinoma Endometrial Serous Adenocarcinoma Endometrial Squamous Cell Carcinoma Endometrial Undifferentiated Carcinoma Recurrent Uterine Corpus Carcinoma Stage IIIA Uterine Corpus Cancer Stage IIIC Uterine Corpus Cancer Stage IVA Uterine Corpus Cancer Stage IVB | Drug: Cisplatin Drug: Doxorubicin Hydrochloride Biological: Filgrastim Drug: Paclitaxel Biological: Pegfilgrastim                                                                                                                                                                                                                           | Incidence of observed DLTs, defined as grade 3-4 hematologic or non-hematologic toxicity graded using CTCAE v3.0 Maximum tolerated dose (MTD) of IP paclitaxel with fixed dose IV doxorubicin hydrochloride and IV cisplatin, determined according to dose-limiting toxicities (DLTs) graded using CTCAE v3.0 MTD of IP paclitaxel with fixed dose IV doxorubicin hydrochloride and IP cisplatin, determined according to DLTs graded using CTCAE v3.0                                                                                                                                                                                                                              | Phase 1         | 27   | 17-Jan-08  | 24-Aug-17 |
| G-CSF | NCT00275015 | Cyclophosphamide and Total Body Irradiation in Treating Patients Who Are Undergoing an Autologous Peripheral Stem Cell Transplant For Chronic Lymphocytic Leukemia                                                             | Completed | Chronic Lymphocytic Leukemia                                                                                                                                                                                                                                                                                                                                           | Biological: filgrastim Drug: carmustine Drug: cyclophosphamide Drug: cytarabine Drug: dexamethasone Drug: etoposide Drug: fludarabine phosphate Drug: melphalan Procedure: bone marrow ablation with stem cell support Procedure: peripheral blood stem cell transplantation Radiation: radiation therapy                                   | Safety of autologous peripheral stem cell transplantation (PBSCT) as measured by a treatment-related mortality of < 5% at 12 months following transplant Feasibility of PBSCT as measured by > 50% of included patients proceeding to transplant Safety of mobilization comprising dexamethasone, carmustine, cytarabine, etoposide, and melphalan (Dexa-BEAM) as measured by a treatment-related mortality of < 5% before transplant phase Efficacy of Dexa-BEAM mobilization as measured by the amount of CD34+ cells > 4x10e6/kg at harvest Complete clinical remissions by NIH criteria at 3 months following transplant Molecular remissions by CDR3 PCR at 3 months following | Phase 2         | 169  | Jan-98     | 11-May-18 |
| G-CSF | NCT00003416 | S9805, High-Dose Melphalan Plus Peripheral Stem Cell Transplantation Followed by Interferon Alfa in Treating Patients With Waldenstrom's Macroglobulinemia                                                                     | Completed | Lymphoma                                                                                                                                                                                                                                                                                                                                                               | Biological: filgrastim Biological: recombinant interferon alfa Drug: dexamethasone Drug: melphalan Procedure: peripheral blood stem cell transplantation                                                                                                                                                                                    | confirmed remission rate overall survival (OS) progression free survival (PFS) toxicity                                                                                                                                                                                                                                                                                                                                                                                                                                                                                                                                                                                             | Phase 2         | 9    | Sep-98     | 6-Mar-15  |
| G-CSF | NCT00938626 | Treated T Cells Followed by a Stem Cell Transplant in Treating Patients With Multiple Myeloma                                                                                                                                  | Completed | Multiple Myeloma and Plasma Cell Neoplasm                                                                                                                                                                                                                                                                                                                              | Biological: anti-CD3 x anti-CD20 bispecific antibody-armed activated T cells Procedure: autologous hematopoietic stem cell transplantation Procedure: peripheral blood stem cell transplantation                                                                                                                                            | Cell-based toxicities according to NCI CTCAE v3.0 criteria Ability to mobilize the number of stem cells required for autologous peripheral blood stem cell transplantation (PBSCT) Engraftment of neutrophils Functional changes in immune cell populations Assess proportion of erythroid blast-forming unit (BFU)-E, colony forming unit-granulocyte-macrophage (CFU)-GM, CFU-GEMM (granulocyte, erythrocyte, monocyte,                                                                                                                                                                                                                                                           | Phase 1         | 12   | Oct-09     | 23-Sep-13 |
| G-CSF | NCT00686556 | Total Marrow Irradiation for Refractory Acute Leukemia                                                                                                                                                                         | Completed | Acute Lymphoblastic Leukemia Myelodysplastic Syndrome Multiple Myeloma                                                                                                                                                                                                                                                                                                 | Drug: cyclophosphamide Drug: cyclosporine Drug: Fludarabine Drug: mycophenolate mofetil Radiation: total marrow irradiation Procedure: umbilical cord blood transplantation Biological: Granulocyte colony-stimulating factor Biological: HLA-matched related donor bone marrow                                                             | Maximum tolerated dose (MTD) of total marrow irradiation (TMI) Incidence of neutrophil engraftment Incidence of platelet engraftment Incidence of complete donor chimerism Incidence of transplantation-related mortality Incidence of grade II-IV and grade III-IV acute graft-versus-host disease (GVHD) after transplantation Incidence of chronic GVHD after transplantation Incidence of relapse after transplantation Disease-free survival after transplantation Durability of remission based on presence of rapid early response after transplantation Overall survival after transplantation                                                                              | Phase 1         | 12   | Aug-12     | 5-Dec-17  |
| G-CSF | NCT01574235 | Nivestim® (Filgrastim) Tolerance in Patients Treated by Toxic Chemotherapeutic Agents                                                                                                                                          | Completed | Solid Tumors Malignant Hemopathy Chemotherapy-induced Febrile Neutropenia (FN)                                                                                                                                                                                                                                                                                         | Biological: Nivestim®                                                                                                                                                                                                                                                                                                                       | Safety of Nivestim® to reduce or prevent febrile neutropenia in patients treated with neutropenia-inducing chemotherapy for a malignant disease, solid tumor or a malignant hemopathy. Efficacy of treatment with Nivestim® Characteristics of the patients treated with Nivestim® in real-life practice Methods of treatment with Nivestim® Profiles of the physicians participating in the study General practice of these physicians with regard to prescription of Granulocyte-Colony Stimulating Factors (G-CSF)                                                                                                                                                               |                 | 2114 | Oct-11     | 28-Jul-15 |
| G-CSF | NCT00003211 | Chemotherapy, Radiation Therapy, and Peripheral Stem Cell Transplantation in Treating Children With Newly Diagnosed Medulloblastoma or Supratentorial                                                                          | Completed | Brain and Central Nervous System Tumors                                                                                                                                                                                                                                                                                                                                | Biological: filgrastim Drug: amifostine trihydrate Drug: cisplatin Drug: cyclophosphamide Drug: vincristine sulfate Procedure: peripheral blood stem cell transplantation Radiation: radiation                                                                                                                                              |                                                                                                                                                                                                                                                                                                                                                                                                                                                                                                                                                                                                                                                                                     | Phase 2         | 94   | Oct-96     | 7-Nov-12  |
| G-CSF | NCT00070187 | Immunotherapy Using Cyclosporine, Interferon Gamma, and Interleukin-2 After High-Dose Myeloablative Chemotherapy With Autologous Stem Cell Transplantation in Treating Patients With Refractory or Relapsed Hodgkin's Lymphoma | Completed | Lymphoma                                                                                                                                                                                                                                                                                                                                                               | Biological: aldesleukin Biological: filgrastim Biological: recombinant interferon gamma Drug: carmustine Drug: cyclosporine Drug: cytarabine Drug: etoposide Drug: melphalan Procedure: autologous bone marrow transplantation Procedure: bone marrow ablation with stem cell support Procedure: peripheral blood stem cell transplantation | Incidence of death, excluding death due to disease, during the period of time from day 0 (transplant) through day 100 post transplant                                                                                                                                                                                                                                                                                                                                                                                                                                                                                                                                               | Phase 2 Phase 3 | 24   | Nov-03     | 17-Oct-13 |



|       |              |                                                                                                                                                            |           |                                                                                                                                                                                                                                                                                                                                                                                                                                                                                                                                                                                                                                      |                                                                                                                                                                                                                                                                                                                                                                                                                         |                                                                                                                                                                                                                                                                                                                                                                                                                                                                                                               |                 |     |           |                |
|-------|--------------|------------------------------------------------------------------------------------------------------------------------------------------------------------|-----------|--------------------------------------------------------------------------------------------------------------------------------------------------------------------------------------------------------------------------------------------------------------------------------------------------------------------------------------------------------------------------------------------------------------------------------------------------------------------------------------------------------------------------------------------------------------------------------------------------------------------------------------|-------------------------------------------------------------------------------------------------------------------------------------------------------------------------------------------------------------------------------------------------------------------------------------------------------------------------------------------------------------------------------------------------------------------------|---------------------------------------------------------------------------------------------------------------------------------------------------------------------------------------------------------------------------------------------------------------------------------------------------------------------------------------------------------------------------------------------------------------------------------------------------------------------------------------------------------------|-----------------|-----|-----------|----------------|
| G-CSF | NCT02042690  | Haplo-identical HSCT Versus Chemotherapy for Adult Acute Lymphoblastic Leukemia Patients                                                                   | Completed | Acute Lymphoblastic Leukemia                                                                                                                                                                                                                                                                                                                                                                                                                                                                                                                                                                                                         | Procedure: Haplo-identical HSCT Drug: Chemotherapy                                                                                                                                                                                                                                                                                                                                                                      | Disease-free survival Rate of cumulative incidence of relapse Overall survival (OS) rate nonrelapse mortality                                                                                                                                                                                                                                                                                                                                                                                                 | Phase 3         | 131 | Jul-14    | 29-May-19      |
| G-CSF | NCT02944604  | The Efficacy and Safety of PEG-rhG-CSF ( Pegylated Recombinant Human Granulocyte Colony Stimulating Factor)in Patients With Breast Cancer Who Were Treated | Completed | Breastcancer                                                                                                                                                                                                                                                                                                                                                                                                                                                                                                                                                                                                                         | Drug: PEG-rhG-CSF                                                                                                                                                                                                                                                                                                                                                                                                       | Incidence of chemotherapy delay                                                                                                                                                                                                                                                                                                                                                                                                                                                                               | Phase 4         | 240 | 8-Sep-16  | 18-Jan-19      |
| G-CSF | NCT03123887  | Evaluate the Hematological Remission Rates and Survival Among Chinese Adult Patients With B-precursor ALL                                                  | Completed | B-precursor Acute Lymphoblastic Leukemia                                                                                                                                                                                                                                                                                                                                                                                                                                                                                                                                                                                             | Other: salvage therapy                                                                                                                                                                                                                                                                                                                                                                                                  | overall response rate proportion of patients in CR, CRh* or CRi overall survival duration of remission (CR/CRh*, CR/CRh*/CRi) proportion of patients receiving allogeneic hematopoietic stem cell transplantation duration of CR/CRh*/CRi the proportion of patients receiving allogeneic hematopoietic stem cell transplantation (AlloHSCT) Complete Response Complete Response with incomplete recovery of blood cells Complete                                                                             |                 | 632 | 10-Jul-15 | April 21, 2017 |
| G-CSF | NCT00003288  | Tirapazamine Plus Cyclophosphamide in Treating Children With Refractory Solid                                                                              | Completed | Unspecified Childhood Solid Tumor, Protocol Specific                                                                                                                                                                                                                                                                                                                                                                                                                                                                                                                                                                                 | Biological: filgrastim Drug: cyclophosphamide Drug: tirapazamine                                                                                                                                                                                                                                                                                                                                                        |                                                                                                                                                                                                                                                                                                                                                                                                                                                                                                               | Phase 1         | 12  | Aug-98    | 5-Feb-13       |
| G-CSF | NCT00002505  | Tumor Cell Vaccine in Treating Patients With Advanced Cancer                                                                                               | Completed | Unspecified Adult Solid Tumor, Protocol Specific                                                                                                                                                                                                                                                                                                                                                                                                                                                                                                                                                                                     | Biological: filgrastim Biological: recombinant interferon gamma Biological: tumor cell lysate vaccine therapy                                                                                                                                                                                                                                                                                                           |                                                                                                                                                                                                                                                                                                                                                                                                                                                                                                               | Phase 2         |     | Aug-92    | 12-May-11      |
| G-CSF | NCT00002526  | Chemotherapy in Treating Patients With Advanced Sarcoma                                                                                                    | Completed | Ovarian Cancer Sarcoma                                                                                                                                                                                                                                                                                                                                                                                                                                                                                                                                                                                                               | Biological: filgrastim Drug: doxorubicin hydrochloride Drug: ifosfamide                                                                                                                                                                                                                                                                                                                                                 |                                                                                                                                                                                                                                                                                                                                                                                                                                                                                                               | Phase 2         | 20  | Jan-93    | 15-May-12      |
| G-CSF | NCT00002693  | Combination Chemotherapy in Treating Patients With Chronic Myelogenous Leukemia or Recurrent                                                               | Completed | Leukemia Neutropenia                                                                                                                                                                                                                                                                                                                                                                                                                                                                                                                                                                                                                 | Biological: filgrastim Drug: carboplatin Drug: topotecan hydrochloride                                                                                                                                                                                                                                                                                                                                                  |                                                                                                                                                                                                                                                                                                                                                                                                                                                                                                               | Phase 1         |     | Oct-95    | 3-Aug-11       |
| G-CSF | NCT000020410 | Radiolabeled Monoclonal Antibody Followed by Peripheral Stem Cell Transplantation in Treating Patients With Relapsed or Metastatic Breast                  | Completed | Breast Cancer                                                                                                                                                                                                                                                                                                                                                                                                                                                                                                                                                                                                                        | Biological: filgrastim Procedure: peripheral blood stem cell transplantation Radiation: yttrium Y 90 monoclonal antibody B3                                                                                                                                                                                                                                                                                             |                                                                                                                                                                                                                                                                                                                                                                                                                                                                                                               | Phase 1         |     | Feb-01    | April 30, 2015 |
| G-CSF | NCT00005952  | Temozolomide Plus Peripheral Stem Cell Transplantation in Treating Children With Newly Diagnosed Malignant Glioma or Recurrent CNS                         | Completed | Brain and Central Nervous System Tumors Childhood Germ Cell Tumor Head and Neck Cancer Kidney Cancer Neuroblastoma Ovarian Cancer Sarcoma Testicular Germ Cell Tumor                                                                                                                                                                                                                                                                                                                                                                                                                                                                 | Biological: filgrastim Drug: temozolomide Procedure: peripheral blood stem cell transplantation                                                                                                                                                                                                                                                                                                                         | Overall response at 12 months Disease-free survival at 12 months Toxicity by NCI Common Toxicity Criteria v. 3.0 at 12 months Engraftment related to autologous marrow or peripheral blood stem cell transplantation at 12 months                                                                                                                                                                                                                                                                             | Phase 1 Phase 2 | 30  | Aug-00    | 20-Jun-13      |
| G-CSF | NCT00004165  | Melphalan Followed by Peripheral Stem Cell Transplantation in Treating Patients With Multiple Myeloma                                                      | Completed | Multiple Myeloma and Plasma Cell Neoplasm                                                                                                                                                                                                                                                                                                                                                                                                                                                                                                                                                                                            | Biological: melphalan Procedure: peripheral blood stem cell transplantation                                                                                                                                                                                                                                                                                                                                             |                                                                                                                                                                                                                                                                                                                                                                                                                                                                                                               | Phase 3         |     | Oct-99    | 6-Jun-12       |
| G-CSF | NCT00003128  | Ifosfamide With or Without Paclitaxel in Treating Patients With Advanced, Refractory, or Recurrent Cancer of the Uterus                                    | Completed | Sarcoma                                                                                                                                                                                                                                                                                                                                                                                                                                                                                                                                                                                                                              | Biological: filgrastim Drug: ifosfamide Drug: paclitaxel                                                                                                                                                                                                                                                                                                                                                                |                                                                                                                                                                                                                                                                                                                                                                                                                                                                                                               | Phase 3         | 166 | Nov-97    | 9-Jul-13       |
| G-CSF | NCT00003065  | Topotecan and Paclitaxel in Treating Patients With Recurrent or Metastatic Cancer of the Cervix                                                            | Completed | Cervical Cancer                                                                                                                                                                                                                                                                                                                                                                                                                                                                                                                                                                                                                      | Biological: filgrastim Drug: paclitaxel Drug: topotecan hydrochloride                                                                                                                                                                                                                                                                                                                                                   |                                                                                                                                                                                                                                                                                                                                                                                                                                                                                                               | Phase 2         | 25  | Jan-97    | 6-Jan-14       |
| G-CSF | NCT00586014  | High Dose Sequential Therapy and Autologous Stem Cell Rescue for Multiple Myeloma                                                                          | Completed | Multiple Myeloma                                                                                                                                                                                                                                                                                                                                                                                                                                                                                                                                                                                                                     | Procedure: High-Dose Sequential Chemotherapy followed by ASCT                                                                                                                                                                                                                                                                                                                                                           | To evaluate the progression free survival at one year in multiple myeloma patients who receive sequentially administered high dose cyclophosphamide and VP-16 followed by high-dose BCNU (Carmustine) plus Melphalan To evaluate the response rates of multiple myeloma patients to this sequentially administered high dose chemotherapy. To evaluate the safety and toxicity of this sequential high dose chemotherapy program in multiple                                                                  | Phase 2         | 91  | May-97    | 8-Jul-14       |
| G-CSF | NCT000049439 | Combination Chemotherapy in Treating Patients With AIDS-Related Non-Hodgkin's Lymphoma                                                                     | Completed | Lymphoma                                                                                                                                                                                                                                                                                                                                                                                                                                                                                                                                                                                                                             | Biological: filgrastim Drug: cyclophosphamide Drug: etoposide Drug: lomustine Drug: procarbazine hydrochloride                                                                                                                                                                                                                                                                                                          | Disease response Quality of life as assessed by the Functional Living Index-Cancer and the Brief Symptom Inventory                                                                                                                                                                                                                                                                                                                                                                                            | Phase 2         | 54  | Mar-98    | 11-Jun-10      |
| G-CSF | NCT00002798  | Combination Chemotherapy With or Without Bone Marrow Transplantation in Treating Children With Acute Myelogenous Leukemia or Myelodysplastic Syndrome      | Completed | Childhood Acute Erythroleukemia (M6) Childhood Acute Megakaryocytic Leukemia (M7) Childhood Acute Monoblastic Leukemia (M5a) Childhood Acute Monocytic Leukemia (M5b) Childhood Acute Myeloblastic Leukemia With Maturation (M2) Childhood Acute Myeloblastic Leukemia Without Maturation (M1) Childhood Acute Myelomonocytic Leukemia (M4) Childhood Myelodysplastic Syndromes Chronic Myelomonocytic Leukemia de Novo Myelodysplastic Syndromes Refractory Anemia Refractory Anemia With Excess Blasts Refractory Anemia With Excess Blasts in Transformation Refractory Anemia With Ringed Sideroblasts Secondary Myelodysplastic | Drug: asparaginase Drug: daunorubicin hydrochloride Drug: fludarabine phosphate Drug: therapeutic hydrocortisone Procedure: allogeneic bone marrow transplantation Radiation: 3-dimensional conformal radiation therapy Biological: filgrastim Drug: cytarabine Drug: idarubicin Drug: dexamethasone Drug: thioguanine Drug: etoposide Drug: methotrexate Drug: cyclophosphamide Biological: aldesieukin Drug: busulfan | Proportions of patients achieving remission rate during induction therapy Proportion of patients dying or with residual disease during induction therapy Time to marrow recovery (induction phase) Frequency of toxicities, including infectious complications (induction phase) Marrow status Percent of blasts Complete remission at the end of consolidation therapy Survival following consolidation Event-free survival following consolidation Overall survival (intensification) EFS (intensification) | Phase 3         | 880 | Aug-96    | 16-Jan-13      |

|       |             |                                                                                                                                                                                                      |           |                                                                                                                                                               |                                                                                                                                                                                                                                                                                                                     |                                                                                                                                                                                                                                                                                                                                                                                                                                          |                 |     |           |                |
|-------|-------------|------------------------------------------------------------------------------------------------------------------------------------------------------------------------------------------------------|-----------|---------------------------------------------------------------------------------------------------------------------------------------------------------------|---------------------------------------------------------------------------------------------------------------------------------------------------------------------------------------------------------------------------------------------------------------------------------------------------------------------|------------------------------------------------------------------------------------------------------------------------------------------------------------------------------------------------------------------------------------------------------------------------------------------------------------------------------------------------------------------------------------------------------------------------------------------|-----------------|-----|-----------|----------------|
| G-CSF | NCT00070200 | Induction Chemotherapy Using Cyclophosphamide and Topotecan in Treating Patients Who Are Undergoing Autologous Peripheral Stem Cell Transplantation for Newly Diagnosed or Progressive Neuroblastoma | Completed | Neuroblastoma                                                                                                                                                 | Biological: filgrastim Drug: cisplatin Drug: cyclophosphamide Drug: doxorubicin hydrochloride Drug: etoposide Drug: isotretinoin Drug: melphalan Drug: topotecan hydrochloride Drug: vincristine sulfate Procedure: conventional surgery Procedure: peripheral blood stem cell transplantation Radiation: radiation | Proportion of patients who are classified as a "success" Number of toxic deaths Proportion of patients with dose limiting toxicities during induction cycle 1 and 2 Tumor contamination of PBSCs Inability to adequately mobilize PBSCs Assessment of response                                                                                                                                                                           | Phase 1         | 31  | Mar-04    | 13-Feb-14      |
| G-CSF | NCT00997529 | Mini Allo Stem Cell Transplantation for the Treatment of Solid Tumors                                                                                                                                | Completed | Metastatic Solid Tumor                                                                                                                                        | Drug: nonmyeloablative stem cell transplant                                                                                                                                                                                                                                                                         | To determine the percent 100-day survival of patients with metastatic solid tumors undergoing non-myeloablative allogeneic stem cell transplantation (SCT). To determine the incidence of treatment-related toxicity and acute and chronic graft versus host disease. To determine the overall survival of patients with metastatic solid tumors undergoing non-myeloablative allogeneic SCT. To evaluate the tumor response in patients | Not Applicable  | 14  | Nov-00    | 18-Jul-16      |
| G-CSF | NCT00352300 | Carboplatin, Paclitaxel, and Pegfilgrastim in Treating Patients With Stage III or Stage IV Ovarian Epithelial, Fallopian Tube, Primary Peritoneal, or Carcinosarcoma                                 | Completed | Fallopian Tube Carcinoma Infectious Disorder Neutropenia Ovarian Carcinosarcoma Primary Peritoneal Carcinoma Stage III Ovarian Cancer Stage IV Ovarian Cancer | Procedure: Adjuvant Therapy Drug: Carboplatin Drug: Paclitaxel Biological: Pegfilgrastim                                                                                                                                                                                                                            | Number of patients who have greater than or equal to 1 dose-limiting toxicity, assessed by Common Terminology Criteria for Adverse Events version 3.0 (CTCAE v3.0) Number of patients with > grade 1 peripheral neuropathy based on the GOG neurotoxicity scale Frequency and duration of objective response (complete and partial response) assessed by Response Evaluation Criteria for Solid Tumors (RECIST) Grade of toxicity as     | Phase 1         | 43  | Jun-06    | 31-Dec-14      |
| G-CSF | NCT00003116 | High-Dose Chemotherapy Plus Peripheral Stem Cell Transplantation in Treating Patients With Hematologic Cancer                                                                                        | Completed | Leukemia Lymphoma Multiple Myeloma and Plasma Cell Neoplasm Myelodysplastic Syndromes Myelodysplastic/Myeloproliferative Diseases                             | Biological: filgrastim Drug: busulfan Drug: cyclophosphamide Drug: cyclosporine Procedure: bone marrow ablation with stem cell support Procedure: peripheral blood stem cell transplantation                                                                                                                        | Hematopoietic reconstitution measured daily during transplant                                                                                                                                                                                                                                                                                                                                                                            | Phase 2         | 66  | May-97    | 11-Jun-10      |
| G-CSF | NCT00083681 | DCEP in Combination With Thalidomide as Salvage Therapy for Post Transplantation Relapse                                                                                                             | Completed | Multiple Myeloma                                                                                                                                              | Drug: Thalidomide Drug: Dexamethasone Drug: Cytoxan Drug: Etoposide Drug: Cisplatin Drug: G-CSF                                                                                                                                                                                                                     | To evaluate the effectiveness of the DCEP chemoregimen with G-CSF support as compared to the DCEP regimen with G-CSF support in combination with thalidomide in high risk patients relapsing after autologous transplantation. To evaluate the quantitative and qualitative toxicities associated with the regimens.                                                                                                                     | Phase 2         | 180 | Jun-98    | 2-Jul-10       |
| G-CSF | NCT03135951 | Pharmacokinetics of SPI-2012 (Eflapegrastim) in Breast Cancer Patients Receiving Docetaxel and Cyclophosphamide (TC)                                                                                 | Completed | Breast Cancer Pharmacokinetics                                                                                                                                | Drug: SPI-2012                                                                                                                                                                                                                                                                                                      | Peak Plasma Concentration (Cmax) Area under the plasma concentration versus time curve (AUC) Number of participants with treatment-related adverse events as assessed by CTCAE v4.03 Population slope of the relationship between the change from baseline in QTc intervals and plasma concentrations of SPI-2012                                                                                                                        | Phase 1         | 26  | 11-May-17 | 31-Dec-18      |
| G-CSF | NCT02156388 | Safety and Pharmacokinetic(PK) Study of GW003 to Metastatic Tumors                                                                                                                                   | Completed | Chemotherapy-induced Neutropenia Metastatic Tumors                                                                                                            | Biological: GW003                                                                                                                                                                                                                                                                                                   | Number of participants with adverse event Duration of severe neutropenia(DSN) Anti-GW003 antibody half-life(consists of distribution half-life [t1/2α] and elimination half-life [t1/2β]) area under the concentration-time curve (AUC)                                                                                                                                                                                                  | Phase 1         | 31  | Aug-13    | 24-Feb-16      |
| G-CSF | NCT00163748 | Efficacy and Treatment Related Toxicity Study of a New Regimen for Lymphoma                                                                                                                          | Completed | Non-Hodgkin's Lymphoma Hodgkin's Disease                                                                                                                      | Drug: gemcitabine, vinorelbine                                                                                                                                                                                                                                                                                      | To evaluate the efficacy and regimen related toxicity of the study treatment (vinorelbine and gemcitabine with filgrastim support). To evaluate the requirement for inpatient admission and / or parenteral antibiotic therapy following study treatment in an outpatient                                                                                                                                                                | Phase 2         | 40  | Feb-01    | 8-Jan-16       |
| G-CSF | NCT02119715 | A Phase II Study Comparing Pegylated rhG-CSF (HHPG-19K) and rhG-CSF in Breast Cancer Patients Receiving Chemotherapy                                                                                 | Completed | Breast Cancer Neutropenia Febrile Neutropenia                                                                                                                 | Drug: Pegylated rhG-CSF 100 µg/kg Drug: Pegylated rhG-CSF:150 µg/kg Drug: rhG-CSF 5 µg/kg/day                                                                                                                                                                                                                       | Incidence and the duration of grade 3/4 neutropenia in cycle 2 and the time frame of ANC recovery to 2.0 × 10 <sup>9</sup> /L Incidence of the febrile neutropenia in cycle 1 and cycle 2 ANC alteration in cycle 1 and cycle 2                                                                                                                                                                                                          | Phase 2         | 182 | Feb-11    | April 22, 2014 |
| G-CSF | NCT00858793 | High-dose Chemotherapy With Transplantation of Gene-modified Haematopoietic Stem Cells for HIV-positive Patients With Malignant Diseases Indicating an HSCT                                          | Completed | AIDS-related Lymphoma HIV Infections                                                                                                                          | Procedure: PBSC-M87o, Gene (M87o)-modified, CD34+ peripheral blood progenitor cells (PBSC)                                                                                                                                                                                                                          | Adverse events, ECOG performance status and laboratory safety tests Remission status (CR or PR) Any relapse of ARL level and kinetics of engraftment and level of gene marking Viral load CD4 counts                                                                                                                                                                                                                                     | Phase 1 Phase 2 | 5   | 28-Nov-08 | 30-May-17      |
| G-CSF | NCT02247869 | Dose-dense ABVD First Line Therapy in Early Stage Unfavorable Hodgkin's Lymphoma                                                                                                                     | Completed | Hodgkin Lymphoma                                                                                                                                              | Drug: dose dense ABVD                                                                                                                                                                                                                                                                                               | Feasibility Activity Overall accuracy of each interim PET interpretation criteria after a minimum follow-up of three years PFS OS Toxicity Predictive Value of each interim PET interpretation criteria after a minimum follow-up of three years                                                                                                                                                                                         | Phase 2         | 100 | Feb-12    | 9-Feb-18       |
| G-CSF | NCT00006252 | Fludarabine and Cyclophosphamide Followed by Peripheral Stem Cell Transplant in Treating Patients With Leukemia or Lymphoma                                                                          | Completed | Leukemia Lymphoma                                                                                                                                             | Drug: fludarabine phosphate Drug: Cyclophosphamide Biological: PBSC Drug: G-CSF Biological: Donor lymphocytes                                                                                                                                                                                                       | Treatment-related mortality within the first 6 months post-transplant Response Percentage of patients achieving complete donor chimerism or mixed donor chimerism Survival                                                                                                                                                                                                                                                               | Phase 2         | 47  | Feb-01    | 18-Jul-16      |
| G-CSF | NCT00001059 | Comparison of Liposomal Doxorubicin Used Alone or in Combination With Bleomycin Plus Vincristine in the Treatment of Kaposi's Sarcoma in Patients With                                               | Completed | Sarcoma, Kaposi HIV Infections                                                                                                                                | Drug: Doxorubicin hydrochloride (liposomal) Drug: Filgrastim Drug: Bleomycin sulfate Drug: Vincristine sulfate                                                                                                                                                                                                      |                                                                                                                                                                                                                                                                                                                                                                                                                                          | Phase 2         | 120 |           | April 17, 2012 |
| G-CSF | NCT00292695 | A Phase II Study of Nasal NK/T-cell Lymphoma                                                                                                                                                         | Completed | Lymphoma                                                                                                                                                      | Other: VP-16, Cisplatin, Ifosfamide, Dexamethosone, Mesna, IF-RT                                                                                                                                                                                                                                                    | tumor response by CT scan or MRI EBV DNA level, AEs, Withdrawal from the study treatment                                                                                                                                                                                                                                                                                                                                                 | Phase 2         | 33  | May-06    | 30-Oct-13      |
| G-CSF | NCT01421927 | Lenalidomide After Reduced-intensity Allogeneic Stem Cell Transplantation for Relapsed Multiple Myeloma                                                                                              | Completed | Multiple Myeloma                                                                                                                                              | Drug: Lenalidomide                                                                                                                                                                                                                                                                                                  | Safety of lenalidomide One-year Progression-Free Survival One-year Overall Survival One-year Transplant Related Mortality One-year incidence of Relapse/Progression Incidences of acute and chronic Graft versus Host Disease Immunophenotypic analysis of blood B, T, NK and dendritic cells Chimerism analysis safety of lenalidomide                                                                                                  | Phase 1         | 13  | Aug-11    | 23-Jul-15      |

|       |             |                                                                                                                                                                                        |           |                                                                                                                                                                                                                                                                                                                                                                                                                                                                                                                                                                                                                                                                                                                                                                                                                                                                                                                                                                                                                                                                                                                                                                                                                                                                                                                                                                                                                            |                                                                                                                                                                                                                                                                                                                              |                                                                                                                                                                                                                                                                                                                                                                                                                                                                                                                                                     |                |     |        |                |
|-------|-------------|----------------------------------------------------------------------------------------------------------------------------------------------------------------------------------------|-----------|----------------------------------------------------------------------------------------------------------------------------------------------------------------------------------------------------------------------------------------------------------------------------------------------------------------------------------------------------------------------------------------------------------------------------------------------------------------------------------------------------------------------------------------------------------------------------------------------------------------------------------------------------------------------------------------------------------------------------------------------------------------------------------------------------------------------------------------------------------------------------------------------------------------------------------------------------------------------------------------------------------------------------------------------------------------------------------------------------------------------------------------------------------------------------------------------------------------------------------------------------------------------------------------------------------------------------------------------------------------------------------------------------------------------------|------------------------------------------------------------------------------------------------------------------------------------------------------------------------------------------------------------------------------------------------------------------------------------------------------------------------------|-----------------------------------------------------------------------------------------------------------------------------------------------------------------------------------------------------------------------------------------------------------------------------------------------------------------------------------------------------------------------------------------------------------------------------------------------------------------------------------------------------------------------------------------------------|----------------|-----|--------|----------------|
| G-CSF | NCT00006363 | Combination Chemotherapy With or Without PSC 833, Peripheral Stem Cell Transplantation, and/or Interleukin-2 in Treating Patients With Acute Myeloid Leukemia                          | Completed | Adult Acute Basophilic Leukemia Adult Acute Eosinophilic Leukemia Adult Acute Erythroid Leukemia (M6) Adult Acute Megakaryoblastic Leukemia (M7) Adult Acute Minimally Differentiated Myeloid Leukemia (M0) Adult Acute Monoblastic Leukemia (M5a) Adult Acute Monoblastic Leukemia and Acute Monocytic Leukemia (M5) Adult Acute Monocytic Leukemia (M5b) Adult Acute Myeloblastic Leukemia With Maturation (M2) Adult Acute Myeloblastic Leukemia Without Maturation (M1) Adult Acute Myeloid Leukemia With 11q23 (MLL) Abnormalities Adult Acute Myeloid Leukemia With Del(5q) Adult Acute Myeloid Leukemia With Inv(16)(p13;q22) Adult Acute Myeloid Leukemia With t(16;16)(p13;q22) Adult Acute Myeloid Leukemia With t(8;21)(q22;q22) Adult Acute Myelomonocytic Leukemia (M4) Adult Erythroleukemia (M6a) Adult Pure Erythroid Leukemia (M6b) Childhood Acute Basophilic Leukemia Childhood Acute Eosinophilic Leukemia Childhood Acute Erythroleukemia (M6) Childhood Acute Megakaryocytic Leukemia (M7) Childhood Acute Minimally Differentiated Myeloid Leukemia (M0) Childhood Acute Monoblastic Leukemia (M5a) Childhood Acute Monoblastic Leukemia and Acute Monocytic Leukemia (M5) Childhood Acute Monocytic Leukemia (M5b) Childhood Acute Myeloblastic Leukemia With Maturation (M2) Childhood Acute Myeloblastic Leukemia Without Maturation (M1) Childhood Acute Myelomonocytic Leukemia (M4) Childhood | Drug: cytarabine Drug: daunorubicin hydrochloride Drug: etoposide Drug: valspodar Biological: filgrastim Drug: busulfan Procedure: autologous hematopoietic stem cell transplantation Procedure: peripheral blood stem cell transplantation Biological: aldesleukin Other: clinical observation Other: pharmacological study | Disease-free survival Overall survival Estimates of disease-free survival curves Estimates of overall survival curves Toxicities and adverse events assessed using National Cancer Institute (NCI) Common Toxicity Criteria (CTC)                                                                                                                                                                                                                                                                                                                   | Phase 3        | 720 | Nov-00 | 4-Jun-13       |
| G-CSF | NCT01225419 | Mobilization by Plerixafor of Haematopoietic Stem Cells in Children                                                                                                                    | Completed | Children Cancer, Solid Tumor                                                                                                                                                                                                                                                                                                                                                                                                                                                                                                                                                                                                                                                                                                                                                                                                                                                                                                                                                                                                                                                                                                                                                                                                                                                                                                                                                                                               | Drug: Plerixafor, mozobil                                                                                                                                                                                                                                                                                                    | Percentage of the children to whom 5.106 cells CD34 + / kg can be collected in 2 masses blood treated (one cytapheresis). Describe the kinetics of mobilization of the hematopoietic progenitor at the child in situation of hematopoietic stable state after a subcutaneous injection of plerixafor Describe the pharmacokinetics of the plerixafor at the child Describe the side effects Describe the capacity of hematopoietic reconstruction of taken cells after mobilization by plerixafor only the toxicity of the plerixafor at the child. | Phase 2        | 5   | Sep-10 | 8-Jul-14       |
| G-CSF | NCT01304849 | Use of Interim PET Scan to Modify Therapy in Advanced Hodgkin's Lymphoma in Order to Improve                                                                                           | Completed | Hodgkin's Lymphoma                                                                                                                                                                                                                                                                                                                                                                                                                                                                                                                                                                                                                                                                                                                                                                                                                                                                                                                                                                                                                                                                                                                                                                                                                                                                                                                                                                                                         | Drug: Escalated BEACOPP                                                                                                                                                                                                                                                                                                      | Efficacy of interim PET guided therapy strategy interms of EFS in advanced HL Toxicity of escalated BEACOPP                                                                                                                                                                                                                                                                                                                                                                                                                                         | Not Applicable | 50  | Jan-11 | 4-Feb-15       |
| G-CSF | NCT00586560 | Karenitecin in Pediatric Patients With Refractory or Recurrent Solid Tumors N10010)                                                                                                    | Completed | Solid Tumors                                                                                                                                                                                                                                                                                                                                                                                                                                                                                                                                                                                                                                                                                                                                                                                                                                                                                                                                                                                                                                                                                                                                                                                                                                                                                                                                                                                                               | Drug: Karenitecin and cyclophosphamide                                                                                                                                                                                                                                                                                       | To determine the maximum tolerated dose (MTD) levels and recommended Phase 2 dose levels of Karenitecin when administered intravenously for 5 consecutive days with a fixed dose of Cytoxan® Secondary objectives include the assessment of toxicity associated with Karenitecin administered in combination with cyclophosphamide; and the assessment of antitumor activity of Karenitecin administered in combination with cyclophosphamide.                                                                                                      | Phase 1        | 15  | Feb-07 | 15-May-12      |
| G-CSF | NCT01999413 | Pilot Study Efficacy and Tolerance Fish Oil Emulsion Daunorubicin and Cytarabine Treatment of AML                                                                                      | Completed | Acute Myeloid Leukemia (AML)                                                                                                                                                                                                                                                                                                                                                                                                                                                                                                                                                                                                                                                                                                                                                                                                                                                                                                                                                                                                                                                                                                                                                                                                                                                                                                                                                                                               | Drug: OMEGAVEN Drug: Daunorubicin Drug: Cytarabine                                                                                                                                                                                                                                                                           | response to study treatment Tolerance Efficacy on peripheral blasts decrease pharmacokinetics                                                                                                                                                                                                                                                                                                                                                                                                                                                       | Phase 2        | 30  | Nov-13 | April 27, 2018 |
| G-CSF | NCT00003765 | O6-benzylguanine and Carmustine in Treating Children With Refractory CNS Tumors                                                                                                        | Completed | Brain and Central Nervous System Tumors                                                                                                                                                                                                                                                                                                                                                                                                                                                                                                                                                                                                                                                                                                                                                                                                                                                                                                                                                                                                                                                                                                                                                                                                                                                                                                                                                                                    | Drug: O6-benzylguanine Drug: carmustine                                                                                                                                                                                                                                                                                      |                                                                                                                                                                                                                                                                                                                                                                                                                                                                                                                                                     | Phase 1        | 36  | May-99 | 5-Feb-13       |
| G-CSF | NCT00003143 | Combination Chemotherapy With or Without Amifostine in Treating Patients With Recurrent or Refractory Non-Hodgkin's Lymphoma or Hodgkin's Disease Undergoing Stem Cell Transplantation | Completed | Lymphoma                                                                                                                                                                                                                                                                                                                                                                                                                                                                                                                                                                                                                                                                                                                                                                                                                                                                                                                                                                                                                                                                                                                                                                                                                                                                                                                                                                                                                   | Drug: Amifostine Drug: DHAP                                                                                                                                                                                                                                                                                                  |                                                                                                                                                                                                                                                                                                                                                                                                                                                                                                                                                     | Phase 2        | 20  | Nov-97 | 4-Oct-12       |
| G-CSF | NCT02028650 | Randomized Study of HLA-mismatched DSI to Treat Relapse Leukemia After HLA- Matched                                                                                                    | Completed | Relapse Leukemia                                                                                                                                                                                                                                                                                                                                                                                                                                                                                                                                                                                                                                                                                                                                                                                                                                                                                                                                                                                                                                                                                                                                                                                                                                                                                                                                                                                                           | Biological: the first donor's stem cell Biological: the second donor's stem cell                                                                                                                                                                                                                                             | Number of Participants with graft versus host diseases Time to Disease Progression                                                                                                                                                                                                                                                                                                                                                                                                                                                                  |                | 20  | Feb-05 | 13-Jul-16      |

|       |             |                                                                                                                                                                                                        |           |                                                                                                                                                                        |                                                                                                                                                                                                                                                                                                   |                                                                                                                                                                                                                                                                                                                                                                                                                                                                                                                                    |                 |      |            |                |
|-------|-------------|--------------------------------------------------------------------------------------------------------------------------------------------------------------------------------------------------------|-----------|------------------------------------------------------------------------------------------------------------------------------------------------------------------------|---------------------------------------------------------------------------------------------------------------------------------------------------------------------------------------------------------------------------------------------------------------------------------------------------|------------------------------------------------------------------------------------------------------------------------------------------------------------------------------------------------------------------------------------------------------------------------------------------------------------------------------------------------------------------------------------------------------------------------------------------------------------------------------------------------------------------------------------|-----------------|------|------------|----------------|
| G-CSF | NCT00614835 | Adjuvant Docetaxel Plus Gemcitabine in Patients With Completely Resected Leiomyosarcoma (LMS) of the Uterus                                                                                            | Completed | Uterine Leiomyosarcoma Uterine Cancer                                                                                                                                  | Drug: Docetaxel plus Gemcitabine                                                                                                                                                                                                                                                                  | To determine the tolerability of delivering 4 cycles of docetaxel plus gemcitabine.[Determine the percentage of pts with completely resected uterine LMS tx with the regimen that remain progression-free at 2 years, & compare this rate with historical controls to establish an estimate of the efficacy of the adjuvant treatment strategy.                                                                                                                                                                                    | Not Applicable  | 25   | Aug-01     | 22-Dec-15      |
| G-CSF | NCT00002657 | SWOG-9239 Reduction of Immunosuppression Plus Interferon Alfa and Combination Chemotherapy in Treating Patients With Malignant Tumors That Develop After Organ Transplant                              | Completed | Lymphoma Multiple Myeloma and Plasma Cell Neoplasm                                                                                                                     | Biological: bleomycin sulfate Biological: recombinant interferon alfa Drug: cyclophosphamide Drug: cytarabine Drug: doxorubicin hydrochloride Drug: etoposide Drug: methotrexate Drug: prednisone Drug: vincristine sulfate Procedure: conventional                                               | Response overall survival                                                                                                                                                                                                                                                                                                                                                                                                                                                                                                          | Phase 2         | 20   | May-95     | 24-Jan-13      |
| G-CSF | NCT00028756 | Comparison of Immediate and Delayed Adjuvant Chemotherapy in Treating Patients Who Have Undergone a Radical Cystectomy for Stage III or Stage IV Transitional Cell Carcinoma of the Bladder Urothelium | Completed | Stage III Bladder Cancer Stage IV Bladder Cancer Transitional Cell Carcinoma of the Bladder                                                                            | Drug: doxorubicin hydrochloride Drug: gemcitabine hydrochloride Drug: vinblastine sulfate Drug: methotrexate Drug: cisplatin Biological: filgrastim                                                                                                                                               | Duration of survival Duration of progression-free survival                                                                                                                                                                                                                                                                                                                                                                                                                                                                         | Phase 3         | 285  | Oct-01     | 2-Aug-16       |
| G-CSF | NCT00952237 | Immune Mobilization of Autologous Peripheral Blood Stem Cells Using Interleukin-2 and GM-CSF                                                                                                           | Completed | Non-Hodgkin's Lymphoma Hodgkin's Disease Multiple Myeloma Other Plasma Cell Dyscrasia (Waldenstrom, Amyloidosis) Leukemia                                              | Drug: GM-CSF Drug: IL-2                                                                                                                                                                                                                                                                           | Can IL-2 be administered with GM-CSF to efficiently mobilize autologous peripheral blood stem cells. This study will determine the maximum tolerated dose of IL-2 and the optimal biological dose with GM-CSF for stem cell mobilization.[Will immune-mobilized stem cell products be well tolerated once infused into patients and will engraft normally following                                                                                                                                                                | Phase 1         | 13   | Jan-03     | April 25, 2018 |
| G-CSF | NCT04224922 | Phase II Study of Neoadjuvant Weekly Paclitaxel and Carboplatin Followed by Dose Dense Epirubicin and Cyclophosphamide in Stage II and III Triple Negative Breast Cancer                               | Completed | Breast Cancer                                                                                                                                                          | Drug: Paclitaxel Drug: Carboplatin Drug: Epirubicin Drug: Cyclophosphamide                                                                                                                                                                                                                        | -The rate of pCR in the breast and axilla (ypT0/is, ypN0) Evaluation of tumor infiltrating lymphocytes on the residual tumor Number of participants with treatment-related adverse events as assessed by CTCAE v.4.03 Evaluation of the drug delivery Evaluation of clinical response rate (RECIST 1.1) by mammography and sonography in breast and axilla.[Evaluation of breast-conserving surgery rate Evaluation of progression free survival Evaluation of overall survival Evaluation of percentage of patients with BRCA1 or | Phase 2         | 63   | May-15     | 18-Jan-20      |
| G-CSF | NCT00003846 | Radiation Therapy, Chemotherapy, and Peripheral Stem Cell Transplantation in Treating Patients With Primitive Neuroectodermal Tumors                                                                   | Completed | Brain and Central Nervous System Tumors Neuroblastoma                                                                                                                  | Biological: filgrastim Drug: carboplatin Drug: cyclophosphamide Drug: thiotepa Drug: vincristine sulfate Procedure: bone marrow ablation with stem cell support Procedure: peripheral blood stem cell transplantation Radiation: radiation therapy                                                | Event Free Survival                                                                                                                                                                                                                                                                                                                                                                                                                                                                                                                | Phase 2         | 25   | Jul-99     | 28-Jul-14      |
| G-CSF | NCT00433433 | Fludeoxyglucose F 18 PET Scan-Guided Therapy or Standard Therapy in Treating Patients With Previously Untreated Stage I or Stage II                                                                    | Completed | Lymphoma                                                                                                                                                               | Drug: ABVD q4 weeks Drug: BEACOPP escalated q3 weeks Radiation: IN-RT 30 Gy (+ boost 6 Gy residual) Procedure: FDG-PET scan                                                                                                                                                                       | Progression-free survival Event-free survival Overall survival Long-term toxicity, in terms of secondary malignancies, cardiovascular events, and pulmonary events                                                                                                                                                                                                                                                                                                                                                                 | Phase 3         | 1952 | Oct-06     | 16-Jun-14      |
| G-CSF | NCT00112827 | Melphalan and Radiation Therapy Followed By Lenalidomide in Treating Patients Who Are Undergoing Autologous Stem Cell Transplant for Stage I, Stage II, or Stage III Multiple Myeloma                  | Completed | Refractory Multiple Myeloma Smoldering Multiple Myeloma Stage I Multiple Myeloma Stage II Multiple Myeloma Stage III Multiple Myeloma                                  | Radiation: total marrow irradiation Drug: melphalan Procedure: peripheral blood stem cell transplantation Biological: filgrastim Genetic: fluorescence in situ hybridization Genetic: cytogenetic analysis Drug: cyclophosphamide Procedure: autologous-autologous tandem hematopoietic stem cell | Feasibility Response rate Progression-free survival Overall survival Assessment of cell biology                                                                                                                                                                                                                                                                                                                                                                                                                                    | Phase 1 Phase 2 | 54   | Nov-04     | 20-Nov-19      |
| G-CSF | NCT00054236 | Combination Chemotherapy Followed By Umbilical Cord Blood Transplantation in Treating Patients With Hematologic Cancer or Severe                                                                       | Completed | Chronic Myeloproliferative Disorders Leukemia Lymphoma Multiple Myeloma and Plasma Cell Neoplasm Myelodysplastic Syndromes Myelodysplastic/Myeloproliferative Diseases | Biological: anti-thymocyte globulin Biological: filgrastim Drug: cyclophosphamide Drug: fludarabine phosphate Procedure: umbilical cord blood                                                                                                                                                     | Event-free survival by disease assessment Umbilical cord blood donor engraftment by chimerism and complete blood count (CBC)                                                                                                                                                                                                                                                                                                                                                                                                       | Phase 1         | 55   | May-02     | 12-Sep-12      |
| G-CSF | NCT00274807 | Combination Chemotherapy in Treating Patients With Newly Diagnosed Acute Myeloid Leukemia                                                                                                              | Completed | Leukemia                                                                                                                                                               | Biological: filgrastim Drug: cytarabine Drug: etoposide Drug: mitoxantrone hydrochloride                                                                                                                                                                                                          |                                                                                                                                                                                                                                                                                                                                                                                                                                                                                                                                    | Phase 2         | 40   | Jun-01     | 11-Feb-11      |
| G-CSF | NCT00258271 | Cadribrine, Cytarabine, and Imatinib Mesylate in Treating Patients With Refractory or Relapsed Acute Myeloid Leukemia or Blastic Phase Chronic Myelogenous Leukemia                                    | Completed | Leukemia                                                                                                                                                               | Biological: filgrastim Drug: cladribine Drug: cytarabine Drug: imatinib mesylate                                                                                                                                                                                                                  |                                                                                                                                                                                                                                                                                                                                                                                                                                                                                                                                    | Phase 1         | 18   | Mar-05     | 16-Oct-13      |
| G-CSF | NCT00093483 | Arsenic Trioxide, Cytarabine, and Idarubicin in Treating Patients With Acute Myeloid Leukemia                                                                                                          | Completed | Leukemia                                                                                                                                                               | Biological: filgrastim Drug: arsenic trioxide Drug: cytarabine Drug: idarubicin                                                                                                                                                                                                                   | Maximum tolerated dose and/or biologically effective dose or arsenic trioxide                                                                                                                                                                                                                                                                                                                                                                                                                                                      | Phase 1         | 61   | April 2002 | 13-Jan-14      |

|       |             |                                                                                                                                                              |           |                                                                                                                                                                                                                                                      |                                                                                                                                                                    |                                                                                                                                                                                                                                                                                                                                                                                                                                         |                 |     |            |           |
|-------|-------------|--------------------------------------------------------------------------------------------------------------------------------------------------------------|-----------|------------------------------------------------------------------------------------------------------------------------------------------------------------------------------------------------------------------------------------------------------|--------------------------------------------------------------------------------------------------------------------------------------------------------------------|-----------------------------------------------------------------------------------------------------------------------------------------------------------------------------------------------------------------------------------------------------------------------------------------------------------------------------------------------------------------------------------------------------------------------------------------|-----------------|-----|------------|-----------|
| G-CSF | NCT00003353 | High-Dose Melphalan Plus Peripheral Stem Cell Transplantation in Treating Patients With Primary Systemic Amyloidosis                                         | Completed | Multiple Myeloma and Plasma Cell Neoplasm                                                                                                                                                                                                            | Biological: filgrastim Drug: melphalan Procedure: bone marrow ablation with stem cell support Procedure: peripheral blood stem cell transplantation                |                                                                                                                                                                                                                                                                                                                                                                                                                                         | Phase 2         |     | Jul-98     | 23-Aug-13 |
| G-CSF | NCT00089167 | Melphalan, Thalidomide, and Dexamethasone in Treating Patients With Newly Diagnosed, Previously Untreated Primary Systemic                                   | Completed | Multiple Myeloma and Plasma Cell Neoplasm                                                                                                                                                                                                            | Biological: filgrastim Drug: dexamethasone Drug: melphalan Drug: thalidomide                                                                                       | Overall progression-free survival at 2 years Plasma cell disease response at 3, 12, and 24 months after treatment Amyloid-related disease response at 12 and 24 months after treatment Prognostic significance of immunoglobulin light-chain variable-region germline gene expression by AL cell clones Molecular minimal residual disease at 12 and 24                                                                                 | Phase 2         |     | May-02     | 16-Jan-13 |
| G-CSF | NCT00008229 | Melphalan With or Without Holmium Ho 166 DOTMP Followed by Peripheral Stem Cell Transplantation in Treating Patients With Multiple                           | Completed | Multiple Myeloma and Plasma Cell Neoplasm                                                                                                                                                                                                            | Biological: filgrastim Drug: melphalan Procedure: peripheral blood stem cell transplantation Radiation: holmium Ho 166 DOTMP                                       |                                                                                                                                                                                                                                                                                                                                                                                                                                         | Phase 3         |     | Aug-00     | 21-Sep-10 |
| G-CSF | NCT00083135 | N2000-01: Double Infusion of Iodine 131 Metaiodobenzylguanidine Followed by Autologous Stem Cell Transplantation                                             | Completed | Neuroblastoma                                                                                                                                                                                                                                        | Biological: filgrastim Procedure: autologous bone marrow transplantation Procedure: peripheral blood stem cell transplantation Radiation: iobenguane I 131         |                                                                                                                                                                                                                                                                                                                                                                                                                                         | Phase 1         | 18  | Mar-04     | 15-Oct-10 |
| G-CSF | NCT00005021 | Combination Chemotherapy With or Without Biological Therapy in Treating Patients With Refractory Solid Tumor or Lymphoma                                     | Completed | Lymphoma Small Intestine Cancer Unspecified Adult Solid Tumor, Protocol Specific                                                                                                                                                                     | Biological: filgrastim Drug: carboplatin Drug: paclitaxel Drug: topotecan hydrochloride                                                                            |                                                                                                                                                                                                                                                                                                                                                                                                                                         | Phase 1         | 17  | Jul-96     | 11-Jul-13 |
| G-CSF | NCT00002977 | Melphalan and Thiotepa Followed by Peripheral Stem Cell Transplantation in Treating Patients With Epithelial Ovarian Cancer in Complete                      | Completed | Ovarian Cancer                                                                                                                                                                                                                                       | Biological: filgrastim Drug: melphalan Drug: thiotepa Procedure: peripheral blood stem cell transplantation                                                        |                                                                                                                                                                                                                                                                                                                                                                                                                                         | Phase 1         | 45  | Jan-97     | 15-Sep-10 |
| G-CSF | NCT00002764 | Surgery With or Without Combination Chemotherapy in Treating Patients With Lung Metastases From Soft Tissue Sarcoma                                          | Completed | Endometrial Cancer Kidney Cancer Metastatic Cancer Ovarian Cancer Pheochromocytoma Sarcoma                                                                                                                                                           | Biological: filgrastim Drug: doxorubicin hydrochloride Drug: ifosfamide Procedure: conventional surgery                                                            |                                                                                                                                                                                                                                                                                                                                                                                                                                         | Phase 3         | 340 | April 1996 | 11-Jul-12 |
| G-CSF | NCT00004177 | Radiolabeled Monoclonal Antibody Plus Peripheral Stem Cell Transplantation in Treating Patients With Refractory or Recurrent Ovarian                         | Completed | Ovarian Cancer                                                                                                                                                                                                                                       | Biological: filgrastim Procedure: peripheral blood stem cell transplantation Radiation: indium In 111 monoclonal antibody MN-14 Radiation: yttrium Y 90 monoclonal | maximum tolerated dose                                                                                                                                                                                                                                                                                                                                                                                                                  | Phase 1 Phase 2 | 15  | Aug-99     | 22-Jun-11 |
| G-CSF | NCT00004085 | Radioimmunotherapy Plus Peripheral Stem Cell Transplantation in Treating Patients With Stage IV Breast Cancer                                                | Completed | Breast Cancer                                                                                                                                                                                                                                        | Biological: filgrastim Procedure: autologous bone marrow transplantation Procedure: peripheral blood stem cell transplantation Radiation: yttrium Y 90             | Safety                                                                                                                                                                                                                                                                                                                                                                                                                                  | Phase 1 Phase 2 | 15  | May-98     | 22-Jun-11 |
| G-CSF | NCT00005946 | Chemotherapy Plus Donor White Blood Cell Infusion in Treating Patients With Relapsed Hematologic Cancer Following Donor Peripheral Stem Cell Transplantation | Completed | Leukemia Lymphoma Multiple Myeloma and Plasma Cell Neoplasm Myelodysplastic Syndromes                                                                                                                                                                | Biological: filgrastim Biological: therapeutic allogeneic lymphocytes Drug: cyclophosphamide Drug: etoposide                                                       |                                                                                                                                                                                                                                                                                                                                                                                                                                         | Phase 1         |     | Oct-00     | 17-Oct-19 |
| G-CSF | NCT00002559 | Combination Chemotherapy in Treating Patients With Germ Cell Tumors That Have Not Responded                                                                  | Completed | Ovarian Cancer Testicular Germ Cell Tumor                                                                                                                                                                                                            | Biological: filgrastim Drug: cisplatin Drug: ifosfamide Drug: paclitaxel                                                                                           |                                                                                                                                                                                                                                                                                                                                                                                                                                         | Phase 1 Phase 2 | 43  | Jan-94     | 2-Jul-13  |
| G-CSF | NCT01627990 | Nivestim™ in Treatment of Malignant Diseases                                                                                                                 | Completed | Solid Tumour Malignant Haematological Tumour Primary or Secondary Prophylactic Treatment                                                                                                                                                             |                                                                                                                                                                    | Incidence of hospitalisation due to febrile neutropenia and/or infection Characterisation of patients being treated with Nivestim™  Treatment with Nivestim™ as part of daily routine Description of the efficacy of treatment with Nivestim™  Detailed description of tolerability and safety Description of the characteristics of the participating physicians Prescription routine of G-CSF (Granulocyte Colony-Stimulating Factor) |                 | 386 | Jun-11     | 24-Jul-15 |
| G-CSF | NCT00014534 | Combination Chemotherapy in Treating Patients With Bladder Cancer                                                                                            | Completed | Bladder Cancer                                                                                                                                                                                                                                       | Biological: filgrastim Drug: cisplatin Drug: doxorubicin hydrochloride Drug: gemcitabine hydrochloride                                                             | Overall survival                                                                                                                                                                                                                                                                                                                                                                                                                        | Phase 3         | 42  | Mar-04     | 14-Jul-16 |
| G-CSF | NCT00003173 | High-Dose Thiotepa Plus Peripheral Stem Cell Transplantation in Treating Patients With Refractory Solid Tumors                                               | Completed | Brain and Central Nervous System Tumors Childhood Germ Cell Tumor Extragenital Germ Cell Tumor Ovarian Cancer Retinoblastoma Testicular Germ Cell Tumor Unspecified Adult Solid Tumor, Protocol Specific Unspecified Childhood Solid Tumor, Protocol | Biological: filgrastim Drug: thiotepa Procedure: autologous bone marrow transplantation Procedure: peripheral blood stem cell transplantation                      |                                                                                                                                                                                                                                                                                                                                                                                                                                         | Phase 2         | 36  | Sep-97     | 7-Mar-13  |
| G-CSF | NCT00024440 | Fludarabine and Cyclophosphamide With or Without Oblimersen in Treating Patients With Relapsed or Refractory Chronic Lymphocytic                             | Completed | Leukemia                                                                                                                                                                                                                                             | Biological: filgrastim Biological: oblimersen sodium Drug: cyclophosphamide Drug: fludarabine phosphate                                                            |                                                                                                                                                                                                                                                                                                                                                                                                                                         | Phase 3         |     | Jul-01     | 6-Jan-14  |
| G-CSF | NCT00023777 | S0112 Cytarabine and Daunorubicin in Treating Older Patients With Acute Myeloid Leukemia                                                                     | Completed | Leukemia                                                                                                                                                                                                                                             | Biological: filgrastim Biological: sargamostim Drug: cytarabine Drug: daunorubicin hydrochloride                                                                   | CR                                                                                                                                                                                                                                                                                                                                                                                                                                      | Phase 2         | 71  | Aug-01     | 6-Mar-15  |

|       |             |                                                                                                                                          |           |                                                                                                      |                                                                                                                                                                                                                                                                                                                                                                                                                       |                                                                                                                                                                                                                                                                                                                                                                                                                                                          |         |      |        |           |
|-------|-------------|------------------------------------------------------------------------------------------------------------------------------------------|-----------|------------------------------------------------------------------------------------------------------|-----------------------------------------------------------------------------------------------------------------------------------------------------------------------------------------------------------------------------------------------------------------------------------------------------------------------------------------------------------------------------------------------------------------------|----------------------------------------------------------------------------------------------------------------------------------------------------------------------------------------------------------------------------------------------------------------------------------------------------------------------------------------------------------------------------------------------------------------------------------------------------------|---------|------|--------|-----------|
| G-CSF | NCT00005824 | Chemotherapy Followed By Peripheral Stem Cell Transplantation in Treating Patients With Recurrent or Refractory AIDS-Related Lymphoma    | Completed | Lymphoma                                                                                             | Biological: filgrastim Drug: busulfan Drug: cyclophosphamide Procedure: peripheral blood stem cell transplantation                                                                                                                                                                                                                                                                                                    |                                                                                                                                                                                                                                                                                                                                                                                                                                                          | Phase 2 |      | Nov-00 | 3-Feb-16  |
| G-CSF | NCT00002810 | High-Dose Melphalan Followed by Peripheral Stem Cell Transplant in Treating Patients With Amyloidosis                                    | Completed | Multiple Myeloma and Plasma Cell Neoplasm                                                            | Biological: filgrastim Drug: melphalan Procedure: bone marrow ablation with stem cell support Procedure: peripheral blood stem cell transplantation                                                                                                                                                                                                                                                                   | Overall survival Time to clinical progression of amyloid symptoms                                                                                                                                                                                                                                                                                                                                                                                        | Phase 2 |      | May-96 | 1-Oct-10  |
| G-CSF | NCT00003783 | Combination Chemotherapy in Treating Children With Very High Risk Acute Lymphocytic Leukemia                                             | Completed | Leukemia                                                                                             | Biological: filgrastim Drug: asparaginase Drug: cyclophosphamide Drug: daunorubicin hydrochloride Drug: dexamethasone Drug: etoposide Drug: idarubicin Drug: leucovorin calcium Drug: mercaptopurine Drug: methotrexate Drug: prednisone Drug: vincristine                                                                                                                                                            | Assess the feasibility of delivering a new combination of agents during a 20 week post-induction consolidation phase                                                                                                                                                                                                                                                                                                                                     | Phase 2 | 36   | Mar-99 | 28-Jul-14 |
| G-CSF | NCT00146562 | Pegfilgrastim and Darbepoetin Alfa in Support of Adjuvant Chemotherapy for Breast Cancer                                                 | Completed | Breast Cancer Stage I Breast Cancer Stage II Breast Cancer                                           | Drug: Darbepoetin Alfa Drug: Pegfilgrastim Drug: Paclitaxel Drug: Doxorubicin Drug: Cyclophosphamide                                                                                                                                                                                                                                                                                                                  | To determine the rate of febrile neutropenia in women treated with dose-dense adjuvant chemotherapy receiving pegfilgrastim every 2 weeks. To determine the rate of RBC transfusion among patients treated with dose-dense adjuvant chemotherapy receiving                                                                                                                                                                                               | Phase 2 | 109  | Jul-03 | 18-Feb-13 |
| G-CSF | NCT00039481 | Oblimersen Plus Combination Chemotherapy and Dexamethasone in Treating Children and Adolescents With Relapsed or Refractory Solid Tumors | Completed | Cardiac Toxicity Unspecified Childhood Solid Tumor, Protocol Specific                                | Biological: oblimersen sodium Drug: dexamethasone hydrochloride Drug: doxorubicin hydrochloride Drug: cyclophosphamide Biological: filgrastim Other: laboratory biomarker                                                                                                                                                                                                                                             | Dose-limiting toxic effects and recommended phase II dose, graded according to the National Cancer Institute Common Toxicity Criteria (NCI CTC) v2.0 Change in pharmacokinetic behavior of this regimen Antitumor activity Biologic activity of oblimersen in mononuclear cells and tumor tissues, in terms of B-cell lymphoma 2 (bc1-2) and related protein expression                                                                                  | Phase 1 | 15   | Nov-02 | 17-Jan-13 |
| G-CSF | NCT01600339 | A Trial of Cabazitaxel for Advanced Transitional Cell Carcinoma (TCC)                                                                    | Completed | Urothelial Carcinoma                                                                                 | Drug: CABAZITAXEL                                                                                                                                                                                                                                                                                                                                                                                                     | Response rate Clinical benefit Duration of response Disease control rate PFS Overall Survival Safety and tolerability of treatment Surrogate markers to cabazitaxel                                                                                                                                                                                                                                                                                      | Phase 2 | 19   | May-12 | 12-May-15 |
| G-CSF | NCT00003114 | Combination Chemotherapy in Treating Patients With AIDS-Related Hodgkin's Disease                                                        | Completed | Lymphoma                                                                                             | Biological: filgrastim Drug: cyclophosphamide Drug: etoposide Drug: lomustine Drug: procarbazine hydrochloride Radiation: radiation therapy                                                                                                                                                                                                                                                                           | Determine the objective response rate, response duration, and survival of patients receiving lomustine/etoposide/cyclophosphamide/procarbazine (CECP) for stage IIB-IV AIDS-related Hodgkin's disease.                                                                                                                                                                                                                                                   | Phase 2 | 5    | Jul-97 | 11-Jun-10 |
| G-CSF | NCT00002611 | Combination Chemotherapy Alone or With Radiation Therapy in Treating Children With Kidney Cancer                                         | Completed | Kidney Cancer                                                                                        | Biological: dactinomycin Biological: filgrastim Drug: cyclophosphamide Drug: doxorubicin hydrochloride Drug: etoposide Drug: vincristine sulfate Procedure: conventional                                                                                                                                                                                                                                              | Progression free survival                                                                                                                                                                                                                                                                                                                                                                                                                                | Phase 3 | 3031 | Jul-95 | 24-Jul-14 |
| G-CSF | NCT02288741 | Tandem Melphalan and Autolog. SCT in MM Patients 60 to 70 Years of Age With and Without Induction Chemotherapy                           | Completed | Multiple Myeloma                                                                                     | Drug: Anthracycline/dexamethasone-based induction chemotherapy Drug: Dexamethasone for control of symptoms Drug: Tumor-reduction chemotherapy and stem cell mobilization Procedure: Stem cell apheresis Drug: Tandem high-dose chemotherapy (melphalan) Procedure:                                                                                                                                                    | Event free survival Overall survival Rate of remission (Evaluation of the overall response rate) Quality of remission (Evaluation of the best response) Short and long time toxicity according to NCI Common Terminology Criteria for Adverse Events (CTCAE) Cytogenetic examination (Univariate analysis according to the method of Kaplan and Meier, Multivariate analysis according to the method of Cox's proportional hazards regression analysis.) | Phase 3 | 549  | Aug-01 | 11-Nov-14 |
| G-CSF | NCT00022737 | Combination Chemotherapy With or Without Peripheral Stem Cell Transplant in Treating Children With Acute Lymphoblastic Leukemia          | Completed | Childhood Acute Lymphoblastic Leukemia in Remission Recurrent Childhood Acute Lymphoblastic Leukemia | Biological: filgrastim Drug: asparaginase Drug: cyclophosphamide Drug: cyclosporine Drug: cytarabine Drug: daunorubicin hydrochloride Drug: dexamethasone Drug: etoposide Drug: ifosfamide Drug: imatinib mesylate Drug: leucovorin calcium Drug: mercaptopurine tablet Drug: methotrexate Drug: pegaspargase Drug: vincristine sulfate Procedure: allogeneic bone marrow transplantation Procedure: peripheral blood | Feasibility, in terms of patient accrual Feasibility, in terms of incidence of adverse events graded according to NCI CTC v 2.0 Event-free survival                                                                                                                                                                                                                                                                                                      | Phase 3 | 220  | Oct-02 | 27-Feb-14 |
| G-CSF | NCT00002524 | Combination Chemotherapy in Treating Patients With AIDS-Related Lymphoma                                                                 | Completed | Lymphoma                                                                                             | Biological: Bleomycin Sulfate Biological: Filgrastim Drug: Cisplatin Drug: Cyclophosphamide Drug: Cytarabine Drug: Doxorubicin Hydrochloride (DOX) Drug: Etoposide Drug: Fluorouracil Drug: Ifosfamide Drug: Leucovorin calcium Drug: Methotrexate Drug: Methylprednisolone Drug: Pentamidine Drug: Prednisone Drug: Trimethoprim-Sulfamethoxazole Drug: Vincristine Sulfate Drug: Zidovudine                         | Number of Patients with Clinical Response                                                                                                                                                                                                                                                                                                                                                                                                                | Phase 2 | 46   | Jun-93 | 30-Jul-12 |

|       |             |                                                                                                                                 |           |                                                                                                                                                                                                           |                                                                                                                                                                                                                                                         |                                                                                                                                                                                                                                                                                                                                                                                                                                                                                                                                                                                                                                                                                                                                                                                                                                                                                                                                                                                                                                                                                                          |                |     |            |               |
|-------|-------------|---------------------------------------------------------------------------------------------------------------------------------|-----------|-----------------------------------------------------------------------------------------------------------------------------------------------------------------------------------------------------------|---------------------------------------------------------------------------------------------------------------------------------------------------------------------------------------------------------------------------------------------------------|----------------------------------------------------------------------------------------------------------------------------------------------------------------------------------------------------------------------------------------------------------------------------------------------------------------------------------------------------------------------------------------------------------------------------------------------------------------------------------------------------------------------------------------------------------------------------------------------------------------------------------------------------------------------------------------------------------------------------------------------------------------------------------------------------------------------------------------------------------------------------------------------------------------------------------------------------------------------------------------------------------------------------------------------------------------------------------------------------------|----------------|-----|------------|---------------|
| G-CSF | NCT00530179 | FDG-PET-Stratified R-DICEP and R-Beam/ASCT For Diffuse Large B-Cell Lymphoma                                                    | Completed | Diffuse Large B Cell Lymphoma                                                                                                                                                                             | Procedure: Autologous Blood Stem Transplantation Drug: R-CHOP                                                                                                                                                                                           |                                                                                                                                                                                                                                                                                                                                                                                                                                                                                                                                                                                                                                                                                                                                                                                                                                                                                                                                                                                                                                                                                                          | Not Applicable | 69  | Jul-07     | 22-Jan-19     |
| G-CSF | NCT00003953 | Chemotherapy Followed by Surgery in Treating Women With Stage II or Stage III Breast Cancer                                     | Completed | Breast Cancer                                                                                                                                                                                             | Biological: filgrastim Drug: CMF regimen Drug: docetaxel Drug: doxorubicin hydrochloride Drug: tamoxifen citrate Procedure: autologous bone marrow transplantation Procedure: surgical                                                                  | Determine the clinical response of these patients to treatment Pathological Response Detection of circulating tumor cells Tumor response correlates with HER2/neu expression of the primary tumor.                                                                                                                                                                                                                                                                                                                                                                                                                                                                                                                                                                                                                                                                                                                                                                                                                                                                                                       | Phase 2        | 39  | Feb-99     | 28-Jan-13     |
| G-CSF | NCT00117442 | A Study of Carboplatin/Paclitaxel With Pegfilgrastim Supported by Haematopoietic Progenitor Cell Re-Infusion in Whole Blood     | Completed | Breast Cancer Lung Cancer Ovarian Cancer                                                                                                                                                                  | Drug: carboplatin Drug: paclitaxel Drug: pegfilgrastim                                                                                                                                                                                                  | PBPC mobilization profiles and success rate of achieving planned chemotherapy administration on time. PBPC kinetics and response to chemotherapy treatment                                                                                                                                                                                                                                                                                                                                                                                                                                                                                                                                                                                                                                                                                                                                                                                                                                                                                                                                               | Phase 2        | 61  | Aug-02     | 13-May-13     |
| G-CSF | NCT00487448 | SMD_FLAG-IDA_98: FLAG-IDA in Induction Treatment of High Risk Myelodysplastic Syndromes or Secondary Acute Myeloblastic         | Completed | Myelodysplastic Syndrome Acute Myeloblastic Leukemia                                                                                                                                                      | Drug: Fludarabine Drug: Cytarabine Drug: G-CSF Drug: Idarubicin Procedure: Peripheral blood stem cell transplantation Procedure: Bone marrow                                                                                                            | Evaluation of efficacy of study treatment: complete remission rate, remission duration and global survival Evaluation of neutropenia and thrombocytopenia duration post-induction chemotherapy Determine the percentage of patients that reach the transplantation Determine the toxicity of induction regimen and the chemotherapy                                                                                                                                                                                                                                                                                                                                                                                                                                                                                                                                                                                                                                                                                                                                                                      | Phase 4        | 200 | Jul-98     | 19-Nov-08     |
| G-CSF | NCT01679860 | Intensive Chemo-immunotherapy as First Line Treatment in Adult Patients With Peripheral T-Cell Lymphoma                         | Completed | Lymphoma, T-Cell, Peripheral                                                                                                                                                                              | Procedure: Clin A, CHOP-CAMPATH (Chemo-immunotherapy) + SCT Drug: Clin B (CHOP- CAMPATH) Chemo-                                                                                                                                                         | Efficacy evaluation of OS (overall survival) DFS (Disease Free Survival) TRM (Treatment Related Mortality)                                                                                                                                                                                                                                                                                                                                                                                                                                                                                                                                                                                                                                                                                                                                                                                                                                                                                                                                                                                               | Phase 2        | 92  | Nov-06     | 6-Sep-12      |
| G-CSF | NCT00002875 | Radiation Therapy Plus Combination Chemotherapy in Treating Children With Medulloblastoma                                       | Completed | Brain Tumors Central Nervous System Tumors                                                                                                                                                                | Biological: filgrastim Drug: cisplatin Drug: cyclophosphamide Drug: lomustine Drug: mesna Drug: vincristine sulfate Radiation: low-LET electron therapy Radiation: low-LET photon therapy                                                               | Event Free Survival                                                                                                                                                                                                                                                                                                                                                                                                                                                                                                                                                                                                                                                                                                                                                                                                                                                                                                                                                                                                                                                                                      | Phase 3        | 421 | Dec-96     | 1-Aug-14      |
| G-CSF | NCT00102609 | A Safety Study Utilizing Yondelis and Doxorubicin in Patients With a Type of Cancer Called Soft Tissue Sarcoma                  | Completed | Soft Tissue Sarcoma Sarcoma Neoplasms, Connective and Soft Tissue Neoplasms by Histologic Type Neoplasms                                                                                                  | Drug: Doxorubicin Drug: Trabectedin Drug: Dexamethasone                                                                                                                                                                                                 | Number of patients with adverse events as a measure of safety The number of patients with clinically relevant changes in clinically laboratory tests Number of patients with neutropenia Plasma concentrations of trabectedin (Yondelis) Plasma concentrations of Doxorubicin Plasma concentrations of Doxorubicin                                                                                                                                                                                                                                                                                                                                                                                                                                                                                                                                                                                                                                                                                                                                                                                       | Phase 1        | 41  | April 2005 | 10-Jan-13     |
| G-CSF | NCT04174599 | Trial to Compare the Efficacy and Safety of F-627 and GRAN®                                                                     | Completed | Breast Cancer                                                                                                                                                                                             | Biological: F-627                                                                                                                                                                                                                                       | The efficacy of F-627 versus GRAN® in the first cycle of prophylactic treatment in subjects with breast cancer receiving chemotherapy, as assessed by the number of days in which ANC < 1.0 × 10 <sup>9</sup> /L in cycle 1 incidence of grade 3 or 4 neutropenia as assessed by ANC (ANC < 1.0 × 10 <sup>9</sup> /L and ANC < 0.5 × 10 <sup>9</sup> /L, respectively)  durations (days) of grade 3 or 4 neutropenia as assessed by ANC (ANC < 1.0 × 10 <sup>9</sup> /L and ANC < 0.5 × 10 <sup>9</sup> /L, respectively)  incidence and duration (days) of grade 4 neutropenia are all as assessed by ANC (ANC < 0.5 × 10 <sup>9</sup> /L)  overall duration (days) of grade 3 or 4 neutropenia as assessed by ANC (ANC < 1.0 × 10 <sup>9</sup> /L and ANC < 0.5 × 10 <sup>9</sup> /L, respectively)  The incidence and duration (days) of grade 2 or above neutropenia are all assessed by ANC (ANC < 1.5 × 10 <sup>9</sup> /L) Incidence of febrile neutropenia (FN) (defined as ANC < 1.0×10 <sup>9</sup> /L; a single measurement of body temperature ≥ 38.3°C or a temperature ≥ 38.0 °C sustained | Phase 3        | 242 | April 2018 | 12, 22-Nov-19 |
| G-CSF | NCT00139230 | Combination Chemotherapy for Locally Advanced Squamous Cell Carcinoma of the Head and Neck                                      | Completed | Squamous Cell Carcinoma Carcinoma of Head/Neck                                                                                                                                                            | Drug: Taxotere Drug: Cisplatin Drug: 5-Fluorouracil Drug: Leucovorin Drug: G-CSF Drug: Ciprofloxacin                                                                                                                                                    | To evaluate the safety of a four day regimen of taxotere, cisplatin, 5-fluorouracil and high-dose leucovorin with growth factor support and ciprofloxacin. To determine the efficacy of this regimen in patients with advances, previously untreated squamous cell carcinoma of                                                                                                                                                                                                                                                                                                                                                                                                                                                                                                                                                                                                                                                                                                                                                                                                                          | Phase 2        | 30  | Jan-97     | 3-Jun-08      |
| G-CSF | NCT00025363 | Comparison of Chemotherapy Regimens in Treating Children With Relapsed or Progressive Rhabdomyosarcoma                          | Completed | Alveolar Childhood Rhabdomyosarcoma Embryonal Childhood Rhabdomyosarcoma Embryonal-botryoid Childhood Rhabdomyosarcoma Previously Treated Childhood Rhabdomyosarcoma Recurrent Childhood Rhabdomyosarcoma | Drug: vincristine sulfate Drug: irinotecan hydrochloride Drug: cyclophosphamide Drug: doxorubicin hydrochloride Drug: ifosfamide Drug: etoposide Drug: tirapazamine Biological: filgrastim Biological: sargramostim Other: pharmacological study Other: | Response at week 6 of investigational window therapy (unfavorable risk patients) Incidence of DLT when tirapazamine is given in combination with cyclophosphamide and doxorubicin, graded according to the NCI CTC v 2.0 Incidence of toxicities associated with the two administration schedules of irinotecan in combination with vincristine, graded according to the NCI CTC v 2.0 (unfavorable risk patients) Blood metabolite SN-38 levels (unfavorable risk patients) Progression-free survival Survival                                                                                                                                                                                                                                                                                                                                                                                                                                                                                                                                                                                          | Phase 2        | 150 | Nov-01     | 17-Jan-13     |
| G-CSF | NCT00165139 | Intensive Chemo-Radiotherapy With Peripheral Blood Progenitor Cell Rescue for Children With Advanced Neuroblastoma and Sarcomas | Completed | Neuroblastoma Ewings Sarcoma Non-rhabdomyosarcoma Soft Tissue Sarcoma                                                                                                                                     | Drug: Vincristine Drug: Cyclophosphamide Drug: Adriamycin Drug: Etoposide (VP-16) Drug: Cisplatin Drug: Carboplatin Drug: Melphalan Drug: Ifosfamide Drug: G-CSF (granulocyte-                                                                          | To determine the toxicity and feasibility of double dose chemo-radiotherapy with blood progenitor cell rescue in this patient population.                                                                                                                                                                                                                                                                                                                                                                                                                                                                                                                                                                                                                                                                                                                                                                                                                                                                                                                                                                | Phase 2        | 20  | Jan-96     | 2-Nov-09      |
| G-CSF | NCT00163761 | Efficacy Study of Outpatient Therapy for Lymphoma                                                                               | Completed | Non-Hodgkin's Lymphoma Hodgkin's Disease                                                                                                                                                                  | Drug: gemcitabine, vinorelbine, ifosfamide, filgrastim Drug: gemcitabine, vinorelbine, filgrastim                                                                                                                                                       | To evaluate the efficacy (overall response rate) of a risk-adjusted outpatient-based approach to lymphoma salvage therapy with VGF (vinorelbine, gemcitabine and pegfilgrastim) and/or F-GIV (gemcitabine, ifosfamide, vinorelbine and pegfilgrastim). To evaluate safety. relapse free survival overall survival. and planned dose-on-time.                                                                                                                                                                                                                                                                                                                                                                                                                                                                                                                                                                                                                                                                                                                                                             | Phase 2        | 90  | Dec-02     | 8-Jan-16      |
| G-CSF | NCT00858377 | A Phase 1 First-in-Human Study Evaluating AMG 900 in Advanced Solid Tumors                                                      | Completed | Advanced Malignancy Advanced Solid Tumors Cancer Solid Tumors Tumors                                                                                                                                      | Drug: Arm 1- Dose Escalation Drug: Arm 1- Dose Expansion                                                                                                                                                                                                | Safety: subject incidence of adverse events, first-cycle DLTs and clinically significant changes in vital signs, weight, ECGs and clinical laboratory tests PK profile: AMG 900 PK parameters including, but not limited to, maximum observed concentration (C <sub>max</sub> ), minimum observed concentration, area under the plasma concentration-time curve and, if feasible, half-life Change in levels of p-Histone H3 from baseline (part 1 - dose escalation only) Response rate in each taxane-resistant tumor type assessed per RECIST guidelines (part 2 - dose expansion only) Change in tumor volume from baseline measured by volumetric CT or MRI Tumor response measured by CT or MRI and assessed per RECIST guidelines Change from baseline in maximum standardized uptake value (SUV <sub>max</sub> ) using                                                                                                                                                                                                                                                                           | Phase 1        | 95  | 10-Aug-09  | 6-May-19      |

|       |              |                                                                                                                                                                             |           |                                                                                                       |                                                                                                                                                                                                                                                                                                                                      |                                                                                                                                                                                                                                                                |         |      |            |            |           |
|-------|--------------|-----------------------------------------------------------------------------------------------------------------------------------------------------------------------------|-----------|-------------------------------------------------------------------------------------------------------|--------------------------------------------------------------------------------------------------------------------------------------------------------------------------------------------------------------------------------------------------------------------------------------------------------------------------------------|----------------------------------------------------------------------------------------------------------------------------------------------------------------------------------------------------------------------------------------------------------------|---------|------|------------|------------|-----------|
| G-CSF | NCT00002784  | High-Dose Combination Chemotherapy Plus Peripheral Stem Cell Transplantation Compared With Standard Combination Chemotherapy in Treating Women With High-Risk Breast Cancer | Completed | Breast Cancer                                                                                         | Biological: filgrastim Drug: CMF regimen Drug: cyclophosphamide Drug: doxorubicin hydrochloride Drug: epirubicin hydrochloride Drug: fluorouracil Drug: mesna Drug: methotrexate Drug: tamoxifen citrate Procedure: peripheral blood stem cell transplantation Radiation: low-LET electron therapy Radiation: low-LET photon therapy | Disease-free survival. Overall survival. Toxicity. Quality of life.                                                                                                                                                                                            | Phase 3 | 344  | Jun-96     | April 2013 | 4,        |
| G-CSF | NCT00002590  | Combination Chemotherapy in Treating Children With Lymphoma                                                                                                                 | Completed | Lymphoma                                                                                              | Biological: filgrastim Drug: cyclophosphamide Drug: cytarabine Drug: daunorubicin hydrochloride Drug: doxorubicin hydrochloride Drug: etoposide Drug: leucovorin calcium Drug: methotrexate Drug: pegaspargase Drug: prednisone Drug: thioguanine Drug: vincristine sulfate Radiation: radiation                                     | Estimate toxicity and feasibility of 11 month multiagent chemotx Provide preliminary data for a future phase III study Investigate the biology of lymphoblastic lymphoma Obtain preliminary data on treatment of anaplastic large cell                         | Phase 2 | 221  | Jul-94     |            | 24-Jul-14 |
| G-CSF | NCT00002757  | TITLE:Less Intensive Therapy for Children With Non-Hodgkin's Lymphoma                                                                                                       | Completed | Leukemia Lymphoma                                                                                     | Biological: filgrastim Drug: cyclophosphamide Drug: cytarabine Drug: doxorubicin hydrochloride Drug: etoposide Drug: methotrexate Drug: prednisolone Drug: prednisone Drug: therapeutic hydrocortisone Drug: vincristine                                                                                                             | Event Free Survival Conditional Survival Failure Free Survival                                                                                                                                                                                                 | Phase 3 | 1148 | Jun-01     |            | 24-Jul-14 |
| G-CSF | NCT00005796  | Combination Chemotherapy Plus Gene Therapy in Treating Patients With CNS Tumors                                                                                             | Completed | Bone Marrow Suppression Brain and Central Nervous System Tumors Drug/Agent Toxicity by Tissue/Organ   | Procedure: filgrastim Biological: gene therapy Drug: lomustine Drug: procarbazine hydrochloride Drug: vincristine sulfate Procedure: in vitro-treated peripheral blood stem cell transplantation                                                                                                                                     | Determine the toxicity (detection of replication competent retrovirus) associated with CD34+ cells transduced with a retroviral vector expressing human O6-methylguanine DNA methyltransferase in adult and pediatric patients with poor prognosis CNS tumors. | Phase 1 | 10   | Feb-00     |            | 25-Mar-15 |
| G-CSF | NCT00002740  | Combination Chemotherapy Plus Peripheral Stem Cell Transplantation Followed by Surgery and/or Radiation Therapy in Treating Young Patients With Advanced Neuroblastoma      | Completed | Neuroblastoma                                                                                         | Biological: filgrastim Drug: carboplatin Drug: cyclophosphamide Drug: doxorubicin hydrochloride Drug: etoposide Drug: mesna Drug: vincristine sulfate Procedure: conventional surgery Procedure: peripheral blood stem cell transplantation Radiation: low-LET cobalt-60 gamma ray therapy Radiation: low-LET photon therapy         | Event Free Survival                                                                                                                                                                                                                                            | Phase 1 | 30   | May-96     |            | 24-Jul-14 |
| G-CSF | NCT000041327 | Combination Chemotherapy Followed By Antiviral Therapy and Interferon Alfa in Treating Patients With HTLV-1-Related Adult T-Cell Leukemia/Lymphoma                          | Completed | Lymphoma                                                                                              | Biological: filgrastim Biological: recombinant interferon alfa Drug: Etoposide Drug: cyclophosphamide Drug: doxorubicin hydrochloride Drug: lamivudine Drug: prednisone Drug: vincristine sulfate Drug: zidovudine                                                                                                                   | Efficacy Duration of response Effects on markers of virus replication and expression and immune function Toxicity                                                                                                                                              | Phase 2 | 19   | Oct-02     |            | 3-Feb-16  |
| G-CSF | NCT00000801  | Phase II Trial of Sequential Chemotherapy and Radiotherapy for AIDS-Related Primary Central Nervous System Lymphoma                                                         | Completed | Lymphoma, Non-Hodgkin HIV Infections                                                                  | Drug: Filgrastim Drug: Vincristine sulfate Drug: Doxorubicin hydrochloride Drug: Cyclophosphamide Drug: Cytarabine Drug:                                                                                                                                                                                                             |                                                                                                                                                                                                                                                                | Phase 2 | 33   |            |            | 1-Nov-12  |
| G-CSF | NCT00133367  | Study of Unrelated Cord Blood Transplantation Using Tacrolimus and Sirolimus                                                                                                | Completed | Multiple Myeloma Non-Hodgkin's Lymphoma Hodgkin's Disease Myelogenous Leukemia Lymphoblastic Leukemia | Drug: Tacrolimus Drug: Sirolimus Drug: G-CSF Drug: Antithymocyte globulin Drug: Thymoglobulin Drug: Fludarabine Drug:                                                                                                                                                                                                                | To determine the effectiveness of tacrolimus and sirolimus in preventing graft versus host disease To evaluate the days to neutrophil engraftment and platelet engraftment To evaluate the relapse rate and overall disease free survival                      | Phase 2 | 32   | Aug-05     |            | 25-Jul-16 |
| G-CSF | NCT00199017  | German Multicenter Trial for the Treatment of Newly Diagnosed T-lymphoblastic Lymphoma in Adults                                                                            | Completed | Lymphoma, Lymphoblastic                                                                               | Drug: Dexamethasone Prednisolone Drug: Cyclophosphamide Drug: Vincristine Drug: Daunorubicin Drug: Asparaginase Drug: G-CSF Drug: Mercaptopurine Drug: Cytarabine Drug: Methotrexate Drug: VP16 Drug: Vindesine Drug: Adriamycin Drug: Thioguanine Drug: HDARAC Procedure: CNS                                                       | remission rate, remission duration, disease free survival, overall survival time and dose compliance, toxicity according to World Health Organization (WHO)                                                                                                    | Phase 4 | 75   | April 2004 |            | 23-Aug-10 |



|       |             |                                                                                                                                                                      |           |                                                                                                                       |                                                                                                                                                                                                                                                                                                          |                                                                                                                                                                |                 |     |            |                |
|-------|-------------|----------------------------------------------------------------------------------------------------------------------------------------------------------------------|-----------|-----------------------------------------------------------------------------------------------------------------------|----------------------------------------------------------------------------------------------------------------------------------------------------------------------------------------------------------------------------------------------------------------------------------------------------------|----------------------------------------------------------------------------------------------------------------------------------------------------------------|-----------------|-----|------------|----------------|
| G-CSF | NCT00199056 | German Multicenter Trial for Treatment of Newly Diagnosed Acute Lymphoblastic Leukemia in Adults (06/99)                                                             | Completed | Adult Acute Lymphocytic Leukemia                                                                                      | Drug: Dexamethasone / Prednisolone Drug: Cyclophosphamide Drug: Methotrexate Drug: Vincristine / Vindesine Drug: Daunorubicin Drug: Asparaginase Drug: G-CSF Drug: Cytarabine Drug: 6-Mercaptopurine Drug: VP16 Drug: Adriamycin Drug: Thioguanine Drug: VM26 Drug: Idarubicin Drug: Fludarabine Drug:   | Remission rate,Remission duration,Disease free survival,Overall survival Time and dose compliance,Realisation of SCT, Toxicity according to WHO, Course of MRD | Phase 4         | 225 | Oct-99     | 20-May-08      |
| G-CSF | NCT00002619 | Chemotherapy Followed by Bone Marrow or Peripheral Stem Cell Transplantation in Treating Patients With Glioblastoma Multiforme or                                    | Completed | Brain and Central Nervous System Tumors                                                                               | Biological: filgrastim Drug: carboplatin Drug: thiotepa Procedure: autologous bone marrow transplantation Procedure: peripheral blood stem cell transplantation                                                                                                                                          |                                                                                                                                                                | Phase 2         | 60  | Sep-94     | 9-Nov-12       |
| G-CSF | NCT00004217 | S9918 PSC 833, Daunorubicin, and Cytarabine in Treating Older Patients With Newly Diagnosed Acute Myeloid Leukemia                                                   | Completed | Leukemia                                                                                                              | Biological: filgrastim Biological: sargramostim Drug: cytarabine Drug: daunorubicin hydrochloride Drug: valsopodar                                                                                                                                                                                       | response                                                                                                                                                       | Phase 2         | 55  | Feb-00     | 6-Mar-15       |
| G-CSF | NCT00002567 | High-Dose Chemotherapy and Radiation Therapy Followed by Peripheral Stem Cell Transplantation in Treating Patients With Acute                                        | Completed | Bone Marrow Ablation Leukemia                                                                                         | Biological: filgrastim Drug: etoposide Procedure: peripheral blood stem cell transplantation Radiation: low-LET electron therapy Radiation: low-LET photon                                                                                                                                               |                                                                                                                                                                | Phase 2         | 45  | Mar-94     | 27-Jun-13      |
| G-CSF | NCT00003133 | Combination Chemotherapy Following Surgery in Treating Patients With Advanced Bladder                                                                                | Completed | Bladder Cancer Transitional Cell Cancer of the Renal Pelvis and Ureter                                                | Biological: filgrastim Drug: cisplatin Drug: doxorubicin hydrochloride Drug: gemcitabine hydrochloride Drug: paclitaxel                                                                                                                                                                                  |                                                                                                                                                                | Phase 1         | 30  | Sep-97     | 28-Jun-13      |
| G-CSF | NCT00004107 | Radiolabeled Monoclonal Antibody Therapy Plus Peripheral Stem Cell Transplantation in Treating Patients With Lymphoma or Waldenstrom's Macroglobulinemia             | Completed | Leukemia Lymphoma                                                                                                     | Biological: filgrastim Procedure: autologous bone marrow transplantation Procedure: peripheral blood stem cell transplantation Radiation: indium In 111 monoclonal antibody MN-14 Radiation:                                                                                                             |                                                                                                                                                                | Phase 1 Phase 2 | 18  | Feb-98     | 22-Jun-11      |
| G-CSF | NCT00004087 | Radiolabeled Monoclonal Antibody Therapy Plus Peripheral Stem Cell Transplantation in Treating Patients With Metastatic or Recurrent Colorectal Cancer or Pancreatic | Completed | Colorectal Cancer Pancreatic Cancer                                                                                   | Biological: filgrastim Procedure: autologous bone marrow transplantation Procedure: peripheral blood stem cell transplantation Radiation: indium In 111 monoclonal antibody MN-14 Radiation:                                                                                                             | maximum tolerated dose                                                                                                                                         | Phase 1 Phase 2 | 15  | Mar-97     | 22-Jun-11      |
| G-CSF | NCT00003032 | High Dose Chemotherapy Plus Peripheral Stem Cell Transplantation Compared With Standard Therapy in Treating Women With Metastatic or                                 | Completed | Breast Cancer                                                                                                         | Biological: filgrastim Drug: cisplatin Drug: cyclophosphamide Drug: mitoxantrone hydrochloride Drug: tamoxifen citrate                                                                                                                                                                                   |                                                                                                                                                                | Phase 3         | 192 | April 1997 | 9-Nov-10       |
| G-CSF | NCT00002600 | Combination Chemotherapy, Bone Marrow Transplantation, and Peripheral Stem Cell Transplantation in Treating Patients With Ovarian                                    | Completed | Fallopian Tube Cancer Ovarian Cancer Primary Peritoneal Cavity Cancer                                                 | Biological: filgrastim Drug: carboplatin Drug: cyclophosphamide Procedure: autologous bone marrow transplantation Procedure: peripheral blood stem cell transplantation                                                                                                                                  |                                                                                                                                                                | Phase 1         | 23  | 21-Oct-94  | 6-Feb-19       |
| G-CSF | NCT00004898 | Radiation Therapy and Chemotherapy Plus Peripheral Stem Cell Transplantation in Treating Patients With High-Grade Lymphoma or Acute Lymphoblastic Leukemia           | Completed | Leukemia Lymphoma                                                                                                     | Biological: filgrastim Drug: cyclophosphamide Drug: etoposide Procedure: peripheral blood stem cell transplantation Radiation: radiation therapy                                                                                                                                                         |                                                                                                                                                                | Phase 1 Phase 2 | 6   | Oct-99     | 12-Jun-12      |
| G-CSF | NCT00003425 | Phase I/II Study of Escalating-Dose Melphalan w/Autologous SCS & Amifostine Cytoprotect                                                                              | Completed | Breast Cancer Leukemia Lymphoma Neuroblastoma Ovarian Cancer Sarcoma Unspecified Adult Solid Tumor, Protocol Specific | Biological: filgrastim Drug: amifostine trihydrate Drug: cyclophosphamide Drug: melphalan Procedure: peripheral blood stem cell transplantation                                                                                                                                                          |                                                                                                                                                                | Phase 1 Phase 2 | 25  | Dec-97     | April 26, 2013 |
| G-CSF | NCT00002618 | Combination Chemotherapy in Treating Pediatric Patients With Advanced-Stage Large Cell Lymphoma                                                                      | Completed | Lymphoma                                                                                                              | Biological: filgrastim Drug: cytarabine Drug: doxorubicin hydrochloride Drug: leucovorin calcium Drug: mercaptopurine Drug: methotrexate Drug: prednisone Drug: vincristine sulfate Radiation: low-LET cobalt-60 gamma ray therapy Radiation: low-LET electron therapy Radiation: low-LET photon therapy | Event free survival                                                                                                                                            | Phase 3         | 242 | Dec-94     | 24-Jul-14      |
| G-CSF | NCT00003313 | Amifostine in Treating Patients With Stage II or Stage III Non-small Cell Lung Cancer                                                                                | Completed | Drug/Agent Toxicity by Tissue/Organ Lung Cancer Oral Complications Radiation Toxicity                                 | Biological: filgrastim Drug: amifostine trihydrate Drug: carboplatin Drug: paclitaxel Radiation: radiation therapy                                                                                                                                                                                       |                                                                                                                                                                | Phase 3         | 243 | Sep-98     | 21-Nov-14      |

|       |             |                                                                                                                                                                                            |           |                                                                                                                       |                                                                                                                                                                                                                                  |                                                                                                                                                                                                                                                                                                                                                                                                                                                                                                                                                                                                                        |                 |     |            |           |
|-------|-------------|--------------------------------------------------------------------------------------------------------------------------------------------------------------------------------------------|-----------|-----------------------------------------------------------------------------------------------------------------------|----------------------------------------------------------------------------------------------------------------------------------------------------------------------------------------------------------------------------------|------------------------------------------------------------------------------------------------------------------------------------------------------------------------------------------------------------------------------------------------------------------------------------------------------------------------------------------------------------------------------------------------------------------------------------------------------------------------------------------------------------------------------------------------------------------------------------------------------------------------|-----------------|-----|------------|-----------|
| G-CSF | NCT00066794 | S0301 Cyclosporine, Daunorubicin, and Cytarabine in Treating Older Patients With Previously Untreated Acute Myeloid Leukemia                                                               | Completed | Leukemia                                                                                                              | Biological: filgrastim Biological: sargramostim Drug: cyclosporine Drug: cytarabine Drug: daunorubicin hydrochloride                                                                                                             | Complete remission (CR)                                                                                                                                                                                                                                                                                                                                                                                                                                                                                                                                                                                                | Phase 2         | 69  | Jul-04     | 6-Mar-15  |
| G-CSF | NCT00006968 | Pentostatin Followed by Peripheral Stem Cell Transplantation in Treating Patients With Advanced Kidney Cancer                                                                              | Completed | Kidney Cancer                                                                                                         | Biological: filgrastim Drug: cyclosporine Drug: pentostatin Procedure: allogeneic bone marrow transplantation Procedure: peripheral blood                                                                                        |                                                                                                                                                                                                                                                                                                                                                                                                                                                                                                                                                                                                                        | Phase 1 Phase 2 | 4   | Sep-00     | 8-Jan-13  |
| G-CSF | NCT00006225 | Peripheral Stem Cell Transplantation in Treating Patients With Breast Cancer or Hematologic Cancer                                                                                         | Completed | Breast Cancer Leukemia Lymphoma Multiple Myeloma and Plasma Cell Neoplasm Myelodysplastic/Myeloproliferative Diseases | Biological: filgrastim Biological: recombinant ft3 ligand Biological: recombinant human thrombopoietin Biological: recombinant interleukin-3 Procedure: in vitro-treated peripheral blood stem cell transplantation              |                                                                                                                                                                                                                                                                                                                                                                                                                                                                                                                                                                                                                        | Phase 1 Phase 2 |     | Nov-99     | 6-Jun-12  |
| G-CSF | NCT00053118 | Chemotherapy and Stem Cell Transplantation in Treating Children With Central Nervous System Cancer                                                                                         | Completed | Brain and Central Nervous System Tumors Lymphoma Neuroblastoma Retinoblastoma                                         | Biological: filgrastim Drug: carboplatin Drug: etoposide Procedure: bone marrow ablation with stem cell support Procedure: peripheral blood stem cell transplantation                                                            |                                                                                                                                                                                                                                                                                                                                                                                                                                                                                                                                                                                                                        | Phase 1         | 1   | Mar-02     | 1-Mar-11  |
| G-CSF | NCT00009880 | Combination Chemotherapy Plus Radiation Therapy With or Without Fluorouracil in Treating Patients With Cancer of the Esophagus or                                                          | Completed | Esophageal Cancer Gastric Cancer                                                                                      | Biological: filgrastim Drug: cisplatin Drug: fluorouracil Drug: paclitaxel Radiation: radiation therapy                                                                                                                          |                                                                                                                                                                                                                                                                                                                                                                                                                                                                                                                                                                                                                        | Phase 2         |     | April 2001 | 19-Jul-13 |
| G-CSF | NCT00007891 | Radiolabeled Monoclonal Antibody Therapy Followed by Bone Marrow or Peripheral Stem Cell Transplantation in Treating Patients With Metastatic Breast Cancer                                | Completed | Breast Cancer                                                                                                         | Biological: filgrastim Procedure: autologous bone marrow transplantation Procedure: peripheral blood stem cell transplantation Radiation: indium In 111 monoclonal antibody BrE-3 Radiation:                                     |                                                                                                                                                                                                                                                                                                                                                                                                                                                                                                                                                                                                                        | Phase 1         |     | Jun-97     | 15-May-13 |
| G-CSF | NCT00006040 | Radiolabeled Monoclonal Antibody Therapy and Etoposide Followed by Peripheral Stem Cell Transplantation in Treating Patients With Advanced Myelodysplastic Syndrome or Refractory Leukemia | Completed | Leukemia Myelodysplastic Syndromes Myelodysplastic/Myeloproliferative Neoplasms                                       | Biological: filgrastim Drug: etoposide Procedure: autologous bone marrow transplantation Procedure: peripheral blood stem cell transplantation Radiation: yttrium Y 90 monoclonal antibody M195                                  |                                                                                                                                                                                                                                                                                                                                                                                                                                                                                                                                                                                                                        | Phase 1         |     | April 2000 | 19-Jun-13 |
| G-CSF | NCT00003342 | Combination Chemotherapy in Treating Patients With Advanced Bladder or Kidney Cancer                                                                                                       | Completed | Bladder Cancer Transitional Cell Cancer of the Renal Pelvis and Ureter                                                | Biological: filgrastim Drug: carboplatin Drug: doxorubicin hydrochloride Drug: gemcitabine hydrochloride Drug: paclitaxel                                                                                                        |                                                                                                                                                                                                                                                                                                                                                                                                                                                                                                                                                                                                                        | Phase 1         | 30  | Dec-97     | 3-Jul-13  |
| G-CSF | NCT03042585 | Autologous Transplant Using Dose-Escalated Total Body Irradiation & Cyclophosphamide & Palifermin for NHL                                                                                  | Completed | Relapsed Non Hodgkin Lymphoma Refractory Non-Hodgkin Lymphoma                                                         | Radiation: Total body irradiation                                                                                                                                                                                                | Determine the frequency and severity of adverse events by evaluating grade 3 and grade 4 adverse events. Blood work will be used to evaluate recovery of white blood cells, red blood cells and platelets. Pulmonary Function Test will be used to evaluate side effects of total body irradiation CT scan or physical exam will be used to evaluate progression free survival. Mucositis measured by investigators. Number of participants with Grade 4 e through 5 Adverse Events that are related to study treatment, grading according to NCI CTCAE Version 3. Mucositis measured by oral mucositis questionnaires | Not Applicable  | 17  | Jun-06     | 21-Aug-19 |
| G-CSF | NCT00003093 | Combination Chemotherapy in Treating Children With Neuroblastoma                                                                                                                           | Completed | Neuroblastoma                                                                                                         | Biological: filgrastim Biological: sargramostim Drug: carboplatin Drug: cyclophosphamide Drug: doxorubicin hydrochloride Drug: etoposide Procedure: conventional surgery Procedure: neoadjuvant therapy                          | Event Free Survival                                                                                                                                                                                                                                                                                                                                                                                                                                                                                                                                                                                                    | Phase 3         | 573 | Mar-88     | 1-Aug-14  |
| G-CSF | NCT00002831 | Chemotherapy Plus Peripheral Stem Cell Transplantation in Treating Patients With Chronic Myelogenous or Acute Leukemia                                                                     | Completed | Leukemia                                                                                                              | Biological: Filgrastim Drug: Busulfan Drug: Cyclophosphamide Drug: Cyclosporine Drug: Decitabine (DAC) Drug: Methotrexate Drug: Methylprednisolone Drug: Tacrolimus Procedure: Allogeneic Bone Marrow Transplantation Procedure: | Maximum Tolerated Dose                                                                                                                                                                                                                                                                                                                                                                                                                                                                                                                                                                                                 | Phase 1 Phase 2 | 24  | 1-Aug-95   | 26-Oct-18 |
| G-CSF | NCT00004056 | Combination Chemotherapy Followed by Melphalan and Peripheral Stem Cell Transplantation in Treating Children With Newly Diagnosed Acute Myeloid Leukemia                                   | Completed | Leukemia                                                                                                              | Biological: filgrastim Drug: asparaginase Drug: cytarabine Drug: daunorubicin hydrochloride Drug: melphalan Drug: thioguanine Procedure: peripheral blood stem cell transplantation                                              | Feasibility and toxicity of an intensive regimen that uses timed-sequential therapy Feasibility and toxicity of a single high dose of melphalan with peripheral stem cell rescue Make observations regarding PCR evidence of Minimal Residual Disease                                                                                                                                                                                                                                                                                                                                                                  | Phase 1         | 35  | Oct-99     | 28-Jul-14 |

|       |             |                                                                                                                                                                                        |           |                                                                                                                                                                                                                                                                                                                                                                                                                                               |                                                                                                                                                                                                                                                                                                                                                                                       |                                                                                                                                                                                                                                                                                                                                            |                |     |            |                |
|-------|-------------|----------------------------------------------------------------------------------------------------------------------------------------------------------------------------------------|-----------|-----------------------------------------------------------------------------------------------------------------------------------------------------------------------------------------------------------------------------------------------------------------------------------------------------------------------------------------------------------------------------------------------------------------------------------------------|---------------------------------------------------------------------------------------------------------------------------------------------------------------------------------------------------------------------------------------------------------------------------------------------------------------------------------------------------------------------------------------|--------------------------------------------------------------------------------------------------------------------------------------------------------------------------------------------------------------------------------------------------------------------------------------------------------------------------------------------|----------------|-----|------------|----------------|
| G-CSF | NCT01416246 | Fractionated Stem Cell Infusions in Myeloma Patients Undergoing Autologous Stem Cell Transplant                                                                                        | Completed | Multiple Myeloma                                                                                                                                                                                                                                                                                                                                                                                                                              | Procedure: Fractionated Stem Cell Infusions                                                                                                                                                                                                                                                                                                                                           | engraftment kinetics safety and toxicity profile neutrophil and platelet recovery rates. incidence of infection red cell and platelet transfusion requirements duration of hospital admission To assess symptom burden Multiple Myeloma response rates correlation between engraftment kinetics and symptom burden the number of CD34+     | Not Applicable | 26  | Aug-11     | April 29, 2016 |
| G-CSF | NCT01696669 | Study of Intensive Chemotherapy, Surgery and Radiotherapy to Treat Ewing's Sarcoma in Children and Young Adults                                                                        | Completed | Ewing's Sarcoma                                                                                                                                                                                                                                                                                                                                                                                                                               | Drug: Chemotherapy Procedure: Surgery Radiation: Radiotherapy                                                                                                                                                                                                                                                                                                                         | Progression Free Survival Objective response rate (ORR) Assessment of disease progression evaluate the toxicity and tolerance to the treatment Gemcitabine + Docetaxel in high risk patients, and toxicity and tolerance of mP6 treatment in all patients. Assessment of bone marrow condition. Study the impact of patients treated with: | Phase 2        | 43  | 30-Mar-10  | 1-Aug-18       |
| G-CSF | NCT00003217 | Combination Chemotherapy in Treating Children With Stage III or Stage IV Non-Hodgkin's Lymphoma or Acute Lymphoblastic Leukemia                                                        | Completed | Leukemia Lymphoma                                                                                                                                                                                                                                                                                                                                                                                                                             | Biological: filgrastim Drug: cyclophosphamide Drug: cytarabine Drug: dexamethasone Drug: doxorubicin hydrochloride Drug: methotrexate Drug: vincristine sulfate                                                                                                                                                                                                                       | Event Free Survival                                                                                                                                                                                                                                                                                                                        | Phase 1        | 20  | Mar-98     | 25-Jul-14      |
| G-CSF | NCT00005977 | Combination Chemotherapy in Treating Patients With Non-Hodgkin's Lymphoma or Acute Lymphocytic Leukemia                                                                                | Completed | Leukemia Lymphoma                                                                                                                                                                                                                                                                                                                                                                                                                             | Biological: filgrastim Drug: cyclophosphamide Drug: cytarabine Drug: dexamethasone Drug: doxorubicin hydrochloride Drug: etoposide Drug: ifosfamide Drug: leucovorin calcium Drug: methotrexate Drug: vincristine sulfate                                                                                                                                                             | Event-free survival                                                                                                                                                                                                                                                                                                                        | Phase 3        | 83  | Sep-00     | 21-Aug-13      |
| G-CSF | NCT00002610 | Chemotherapy With or Without Surgery, Radiation Therapy, or Stem Cell Transplantation in Treating Young Patients With Kidney Tumors                                                    | Completed | Kidney Cancer                                                                                                                                                                                                                                                                                                                                                                                                                                 | Biological: dactinomycin Biological: filgrastim Drug: carboplatin Drug: cyclophosphamide Drug: doxorubicin hydrochloride Drug: etoposide Drug: vincristine sulfate Procedure: conventional surgery Radiation: radiation therapy                                                                                                                                                       | Event free survival Event Free Survival Post-relapse survival Response rate                                                                                                                                                                                                                                                                | Phase 3        | 203 | Jan-96     | 25-Jul-14      |
| G-CSF | NCT00478361 | Gemcitabine, Paclitaxel, Doxorubicin in Metastatic or Unresectable Bladder Cancer With Decreased Kidney Function                                                                       | Completed | Distal Urethral Cancer Metastatic Transitional Cell Cancer of the Renal Pelvis and Ureter Proximal Urethral Cancer Recurrent Bladder Cancer Recurrent Transitional Cell Cancer of the Renal Pelvis and Ureter Recurrent Urethral Cancer Regional Transitional Cell Cancer of the Renal Pelvis and Ureter Stage III Bladder Cancer Stage IV Bladder Cancer Transitional Cell Carcinoma of the Bladder Urethral Cancer Associated With Invasive | Drug: Gemcitabine hydrochloride Drug: Paclitaxel Drug: Doxorubicin hydrochloride Drug: Pegfilgrastim                                                                                                                                                                                                                                                                                  | Overall response rate (complete and partial response) Time to progression Survival duration Frequency of neutropenic fever or treatment delay because of neutropenia                                                                                                                                                                       | Phase 2        | 40  | April 2007 | 22-Jun-15      |
| G-CSF | NCT01446458 | Phase I Study of Stereotactic Body Radiation Therapy and FOLFIRINOX in the Neoadjuvant Therapy of Pancreatic Cancer                                                                    | Completed | Cancer of Pancreas Cancer of the Pancreas Neoplasms, Pancreatic Pancreas Cancer Pancreas Neoplasms                                                                                                                                                                                                                                                                                                                                            | Drug: Modified FOLFIRINOX Radiation: Stereotactic Body Radiotherapy (SBRT)                                                                                                                                                                                                                                                                                                            | Maximum tolerated total dose of stereotactic body radiation to patients with resectable or borderline resectable pancreas cancer following FOLFIRINOX chemotherapy Clinical and pathologic objective response rate as measured by MRI (clinical response) and histopathology and rate of complete resection (R0) (pathologic response)     | Phase 1        | 13  | Nov-11     | 22-Mar-16      |
| G-CSF | NCT00002548 | SWOG-9321 Melphalan, TBI, and Transplant vs Combo Chemo in Untreated Myeloma                                                                                                           | Completed | Multiple Myeloma                                                                                                                                                                                                                                                                                                                                                                                                                              | Biological: recombinant interferon alfa Drug: carmustine Drug: cyclophosphamide Drug: dexamethasone Drug: doxorubicin hydrochloride Drug: melphalan Drug: prednisone Drug: vincristine sulfate Procedure: allogeneic bone marrow transplantation Procedure: autologous bone marrow transplantation Procedure: peripheral blood stem cell transplantation Radiation: radiation therapy | survival                                                                                                                                                                                                                                                                                                                                   | Phase 3        | 899 | Jan-94     | 6-Mar-15       |
| G-CSF | NCT00006379 | Non-Ablative Allo HSCT For Hematologic Malignancies or SAA                                                                                                                             | Completed | Chronic Myeloproliferative Disorders Leukemia Lymphoma Multiple Myeloma and Plasma Cell Neoplasm Myelodysplastic Syndromes Myelodysplastic/Myeloproliferative Diseases Precancerous/Nonmalignant Condition Small Intestine Cancer                                                                                                                                                                                                             | Biological: anti-thymocyte globulin Biological: graft-versus-tumor induction therapy Drug: cyclophosphamide Drug: fludarabine phosphate Procedure: peripheral blood stem cell transplantation                                                                                                                                                                                         | Evaluation of Donor Engraftment Stable donor hematopoietic chimerism Event free and overall survival                                                                                                                                                                                                                                       | Phase 2        | 58  | Jun-00     | 8-Dec-11       |
| G-CSF | NCT00652691 | Topotecan, High-Dose Cyclophosphamide, Carboplatin, and an Autologous Peripheral Blood Cell Transplant in Treating Patients With Recurrent Ovarian Cancer or Primary Peritoneal Cancer | Completed | Ovarian Cancer Peritoneal Cavity Cancer                                                                                                                                                                                                                                                                                                                                                                                                       | Biological: filgrastim Drug: carboplatin Drug: cyclophosphamide Drug: topotecan hydrochloride Procedure: autologous hematopoietic stem cell transplantation Procedure: peripheral blood stem cell transplantation                                                                                                                                                                     | Maximum tolerated dose of topotecan hydrochloride Toxicity according to NCI criteria                                                                                                                                                                                                                                                       | Phase 1        | 48  | Aug-98     | April 2019     |
| G-CSF | NCT00462787 | Combination Chemotherapy in Treating Young Patients With Relapsed or Refractory Acute                                                                                                  | Completed | Leukemia                                                                                                                                                                                                                                                                                                                                                                                                                                      | Biological: filgrastim Drug: clofarabine Drug: dexamethasone Drug: thiotepa Drug: topotecan hydrochloride Drug: vinorelbine                                                                                                                                                                                                                                                           | Maximum tolerated dose of clofarabine Overall survival Progression-free survival                                                                                                                                                                                                                                                           | Phase 1        | 23  | April 2007 | 14-Nov-13      |

|       |             |                                                                                                                                                                                                  |           |                                                                                                                                                                             |                                                                                                                                                                                                                              |                                                                                                                                 |                 |     |            |                |
|-------|-------------|--------------------------------------------------------------------------------------------------------------------------------------------------------------------------------------------------|-----------|-----------------------------------------------------------------------------------------------------------------------------------------------------------------------------|------------------------------------------------------------------------------------------------------------------------------------------------------------------------------------------------------------------------------|---------------------------------------------------------------------------------------------------------------------------------|-----------------|-----|------------|----------------|
| G-CSF | NCT00004089 | Chemotherapy Plus Radiation Therapy in Treating Patients With Previously Untreated Thyroid Cancer                                                                                                | Completed | Head and Neck Cancer                                                                                                                                                        | Biological: filgrastim Drug: fluorouracil Drug: hydroxyurea Drug: paclitaxel Procedure: conventional surgery Radiation: radiation                                                                                            |                                                                                                                                 | Phase 2         |     | Aug-99     | 10-Jul-13      |
| G-CSF | NCT00002510 | Chemotherapy and Radiation Therapy Followed by Peripheral Stem Cell Transplantation in Treating Patients With Non-Hodgkin's                                                                      | Completed | Lymphoma                                                                                                                                                                    | Biological: filgrastim Drug: cyclophosphamide Drug: etoposide Drug: mesna Procedure: peripheral blood stem cell transplantation Radiation: radiation                                                                         |                                                                                                                                 | Phase 1 Phase 2 |     | April 1992 | 1-Oct-10       |
| G-CSF | NCT00003400 | Combination Chemotherapy Plus Peripheral Stem Cell Transplantation in Treating Patients With Metastatic Prostate Cancer                                                                          | Completed | Prostate Cancer                                                                                                                                                             | Biological: filgrastim Drug: carmustine Drug: cisplatin Drug: melphalan Drug: vinorelbine tartrate Procedure: peripheral blood stem cell transplantation                                                                     |                                                                                                                                 | Phase 2         | 45  | Sep-98     | 4-Nov-19       |
| G-CSF | NCT00002630 | High-Dose Melphalan, Total-Body Irradiation, and Peripheral Stem Cell Transplantation in Treating Patients With Multiple Myeloma in First Relapse                                                | Completed | Multiple Myeloma and Plasma Cell Neoplasm                                                                                                                                   | Biological: filgrastim Drug: cyclophosphamide Drug: melphalan Procedure: peripheral blood stem cell transplantation Radiation: low-LET cobalt-60 gamma ray therapy Radiation: low-LET photon therapy                         |                                                                                                                                 | Phase 2         | 50  | Jun-93     | 11-May-11      |
| G-CSF | NCT00003944 | Combination Chemotherapy Plus Peripheral Stem Cell Transplantation in Treating Patients With Stage III or Stage IV Ovarian, Fallopian Tube, or Primary Peritoneal Cancer                         | Completed | Fallopian Tube Cancer Ovarian Cancer Peritoneal Cavity Cancer                                                                                                               | Biological: filgrastim Drug: carboplatin Drug: cyclophosphamide Drug: paclitaxel Drug: topotecan hydrochloride Procedure: peripheral blood stem cell transplantation                                                         |                                                                                                                                 | Phase 2         | 3   | Aug-98     | April 17, 2013 |
| G-CSF | NCT00002870 | High Dose Chemotherapy Plus Peripheral Stem Cell Transplantation Compared With Standard Therapy in Treating Women With Locally Recurrent or Metastatic Breast                                    | Completed | Breast Cancer                                                                                                                                                               | Biological: filgrastim Drug: cyclophosphamide Drug: epirubicin hydrochloride Drug: fluorouracil Drug: thiotepa Procedure: peripheral blood stem cell transplantation                                                         | Disease free survival                                                                                                           | Phase 3         | 180 | Dec-94     | 16-Dec-14      |
| G-CSF | NCT00002788 | High-Dose Chemotherapy Followed by Total-Body Irradiation and Peripheral Stem Cell Transplantation in Treating Patients With Chronic Lymphocytic Leukemia                                        | Completed | Leukemia                                                                                                                                                                    | Biological: filgrastim Drug: cyclophosphamide Drug: dexamethasone Drug: etoposide Procedure: peripheral blood stem cell transplantation Radiation: radiation therapy                                                         |                                                                                                                                 | Phase 1         | 15  | Oct-95     | 15-Sep-10      |
| G-CSF | NCT00003943 | Combination Chemotherapy Plus Peripheral Stem Cell Transplantation in Treating Patients With Metastatic Cancer.                                                                                  | Completed | Carcinoma of Unknown Primary Lung Cancer                                                                                                                                    | Biological: filgrastim Drug: carboplatin Drug: cyclophosphamide Drug: paclitaxel Drug: topotecan hydrochloride Procedure: peripheral blood stem cell transplantation                                                         | Determine the one year progression-free survival Overall survival; safety of regimen; CR rate; lab correlates; pharmacokinetics | Phase 2         | 3   | Sep-98     | April 17, 2013 |
| G-CSF | NCT00004174 | Combination Chemotherapy Followed By Peripheral Stem Cell Transplantation in Treating Patients With Advanced Breast Cancer                                                                       | Completed | Breast Cancer                                                                                                                                                               | Biological: filgrastim Drug: cyclophosphamide Drug: paclitaxel Drug: thiotepa Procedure: peripheral blood stem cell transplantation Radiation: radiation                                                                     |                                                                                                                                 | Phase 1         | 30  | Oct-99     | 10-Jul-13      |
| G-CSF | NCT00003081 | Combination Chemotherapy, Peripheral Stem Cell Transplantation, and Radiation Therapy in Treating Patients With Ewing's Sarcoma, Peripheral Primitive Neuroectodermal Tumor, or Rhabdomyosarcoma | Completed | Sarcoma                                                                                                                                                                     | Biological: filgrastim Drug: busulfan Drug: melphalan Drug: thiotepa Procedure: peripheral blood stem cell transplantation Radiation: radiation therapy                                                                      |                                                                                                                                 | Phase 1         | 16  | Mar-98     | 20-Sep-10      |
| G-CSF | NCT00004048 | Radioimmunotherapy With or Without Chemotherapy Plus Peripheral Stem Cell Transplantation in Treating Patients With Thyroid Cancer                                                               | Completed | Head and Neck Cancer                                                                                                                                                        | Biological: filgrastim Drug: doxorubicin hydrochloride Procedure: autologous bone marrow transplantation Procedure: peripheral blood stem cell transplantation Radiation: indium In 111 monoclonal antibody MN-14 Radiation: |                                                                                                                                 | Phase 1 Phase 2 | 30  | Sep-98     | 22-Jun-11      |
| G-CSF | NCT00007813 | Peripheral Stem Cell Transplantation Plus Chemotherapy in Treating Patients With Malignant Solid Tumors                                                                                          | Completed | Brain and Central Nervous System Tumors Childhood Germ Cell Tumor Extragenital Germ Cell Tumor Liver Cancer Neuroblastoma Ovarian Cancer Sarcoma Testicular Germ Cell Tumor | Biological: filgrastim Drug: carboplatin Drug: cyclophosphamide Drug: etoposide Procedure: autologous bone marrow transplantation Procedure: peripheral blood stem cell transplantation                                      |                                                                                                                                 | Phase 1         | 21  | 31-May-97  | 15-Mar-19      |
| G-CSF | NCT00002919 | Combination Chemotherapy in Treating Patients With Stage II Bladder Cancer                                                                                                                       | Completed | Bladder Cancer                                                                                                                                                              | Biological: filgrastim Drug: cisplatin Drug: doxorubicin hydrochloride Drug: methotrexate Drug: vinblastine sulfate Procedure: conventional surgery                                                                          |                                                                                                                                 | Phase 2         | 30  | Nov-96     | 3-Jul-13       |

|       |              |                                                                                                                                                 |           |                                                                                                                                                                                          |                                                                                                                                                                                                   |                                                                                                                                                                                                                                                                                                                                             |                 |     |           |           |
|-------|--------------|-------------------------------------------------------------------------------------------------------------------------------------------------|-----------|------------------------------------------------------------------------------------------------------------------------------------------------------------------------------------------|---------------------------------------------------------------------------------------------------------------------------------------------------------------------------------------------------|---------------------------------------------------------------------------------------------------------------------------------------------------------------------------------------------------------------------------------------------------------------------------------------------------------------------------------------------|-----------------|-----|-----------|-----------|
| G-CSF | NCT00003035  | Doxorubicin and Paclitaxel in Treating Women With Locally Advanced Breast Cancer                                                                | Completed | Breast Cancer                                                                                                                                                                            | Biological: filgrastim Drug: doxorubicin hydrochloride Drug: paclitaxel Drug: tamoxifen citrate Procedure: surgical procedure Radiation: radiation therapy                                        |                                                                                                                                                                                                                                                                                                                                             | Phase 2         | 40  | Mar-97    | 24-Mar-11 |
| G-CSF | NCT00002679  | Adjuvant High-Dose, Sequential Chemotherapy in Treating Patients With Resected Breast Cancer                                                    | Completed | Breast Cancer                                                                                                                                                                            | Biological: filgrastim Drug: cyclophosphamide Drug: doxorubicin hydrochloride Drug: paclitaxel Drug: tamoxifen citrate Radiation: radiation                                                       |                                                                                                                                                                                                                                                                                                                                             | Phase 2         | 89  | Feb-94    | 26-Aug-09 |
| G-CSF | NCT000072319 | Neoadjuvant or Adjuvant Epirubicin, Cyclophosphamide, and Paclitaxel in Treating Women With Stage I, Stage II, or Stage III Breast Cancer       | Completed | Breast Cancer                                                                                                                                                                            | Biological: filgrastim Drug: cyclophosphamide Drug: epirubicin hydrochloride Drug: paclitaxel Procedure: adjuvant therapy Procedure: neoadjuvant                                                  |                                                                                                                                                                                                                                                                                                                                             | Phase 2         |     | Aug-03    | 4-Mar-13  |
| G-CSF | NCT00004232  | Bone Marrow and Peripheral Stem Cell Transplantation in Treating Patients With Hematologic Cancer                                               | Completed | Chronic Myeloproliferative Disorders Graft Versus Host Disease Leukemia Lymphoma Multiple Myeloma and Plasma Cell Neoplasm Myelodysplastic Syndromes Precancerous/Nonmalignant Condition | Biological: filgrastim Drug: cyclosporine Drug: methylprednisolone Drug: prednisone Procedure: allogeneic bone marrow transplantation Procedure:                                                  |                                                                                                                                                                                                                                                                                                                                             | Phase 1         |     | Oct-99    | 1-Jun-12  |
| G-CSF | NCT000028860 | Combination Chemotherapy Following Surgery in Treating Patients With Urinary Tract Cancer                                                       | Completed | Bladder Cancer Transitional Cell Cancer of the Renal Pelvis and Ureter                                                                                                                   |                                                                                                                                                                                                   |                                                                                                                                                                                                                                                                                                                                             | Phase 2         |     | Oct-01    | 10-Jul-13 |
| G-CSF | NCT000025558 | Combination Chemotherapy Followed by Peripheral Stem Cell Transplantation or Bone Marrow Transplantation in Treating Patients With Brain Cancer | Completed | Brain and Central Nervous System Tumors                                                                                                                                                  | Biological: filgrastim Drug: carboplatin Drug: temozolomide Drug: thiotepa Procedure: autologous bone marrow transplantation Procedure: peripheral blood stem cell transplantation                |                                                                                                                                                                                                                                                                                                                                             | Phase 1         |     | Oct-00    | 28-Mar-11 |
| G-CSF | NCT000020176 | Allogeneic Peripheral Stem Cell Transplantation in Treating Patients With Stage IV Breast Cancer                                                | Completed | Breast Cancer                                                                                                                                                                            | Biological: filgrastim Biological: therapeutic allogeneic lymphocytes Drug: cyclophosphamide Drug: cyclosporine Drug: fludarabine phosphate Procedure: peripheral blood stem cell transplantation |                                                                                                                                                                                                                                                                                                                                             | Phase 2         |     | Jun-00    | 20-Jun-13 |
| G-CSF | NCT00003105  | Combination Chemotherapy in Treating Patients With Metastatic or Locally Advanced Bladder Cancer                                                | Completed | Bladder Cancer Transitional Cell Cancer of the Renal Pelvis and Ureter                                                                                                                   | Biological: filgrastim Drug: cisplatin Drug: doxorubicin hydrochloride Drug: gemcitabine hydrochloride Drug:                                                                                      |                                                                                                                                                                                                                                                                                                                                             | Phase 1 Phase 2 | 30  | Sep-97    | 3-Jul-13  |
| G-CSF | NCT00002592  | Chemotherapy and Bone Marrow Transplantation in Treating Patients With Chronic Myelogenous Leukemia                                             | Completed | Leukemia                                                                                                                                                                                 | Biological: c-myb antisense oligonucleotide G4460 Biological: filgrastim Drug: busulfan Drug: cyclophosphamide Procedure: autologous bone marrow transplantation Procedure: in                    | Number of Adverse Events                                                                                                                                                                                                                                                                                                                    | Phase 2         | 40  | Jun-93    | 14-Jan-15 |
| G-CSF | NCT00003243  | Combination Chemotherapy Plus Infusion of White Blood Cells in Treating Patients With Hematologic Cancer                                        | Completed | Leukemia Lymphoma Myelodysplastic Syndromes Myelodysplastic/Myeloproliferative Diseases                                                                                                  | Biological: aldesleukin Biological: filgrastim Biological: therapeutic allogeneic lymphocytes Drug: cyclophosphamide Drug: etoposide Drug: pegylated liposomal doxorubicin hydrochloride          |                                                                                                                                                                                                                                                                                                                                             | Phase 1         |     | Jan-98    | 10-Mar-10 |
| G-CSF | NCT00003027  | Combination Chemotherapy With or Without Interleukin-2 and Interferon Alfa in Treating Patients With Metastatic Melanoma                        | Completed | Melanoma (Skin)                                                                                                                                                                          | Biological: aldesleukin Biological: filgrastim Biological: recombinant interferon alfa Drug: cisplatin Drug: dacarbazine Drug: vinblastine                                                        | Overall survival Response rate (complete and partial response) Durable complete response rate Response duration                                                                                                                                                                                                                             | Phase 3         | 482 | Oct-97    | 29-Jan-10 |
| G-CSF | NCT00002995  | Combination Chemotherapy With or Without Radiation Therapy in Treating Patients With Newly Diagnosed Rhabdomyosarcoma                           | Completed | Sarcoma                                                                                                                                                                                  | Biological: dactinomycin Biological: filgrastim Biological: sargramostim Drug: cyclophosphamide Drug: vincristine sulfate Radiation: radiation therapy                                            | Failure-free survival                                                                                                                                                                                                                                                                                                                       | Phase 3         | 483 | Aug-97    | 14-Feb-14 |
| G-CSF | NCT000091526 | A Randomized Trial Assessing the Roles of AraC in Newly Diagnosed APL Promyelocytic Leukemia (APL)                                              | Completed | Leukemia, Promyelocytic, Acute                                                                                                                                                           | Drug: Arac                                                                                                                                                                                        | for patients with initial WBC counts > 10000/mm3 - the main end point for this second randomization is relapse at 2 years secondary end points are : complete remission rate ; survival and event free survival at 2 years, and quality-adjusted survival (Q-TWiST). secondary end points are : survival and event free survival at 2 years | Phase 3         | 250 | Jun-00    | 14-Jan-08 |
| G-CSF | NCT000069636 | Panobinostat Plus Ifosfamide, Carboplatin, and Etoposide (ICE) Compared With ICE For Relapsed                                                   | Completed | Hodgkin's Lymphoma                                                                                                                                                                       | Drug: Panobinostat Drug: Ifosfamide Drug: Mesna Drug: Carboplatin Drug: Etoposide Drug: Pegfilgrastim                                                                                             | Phase I Maximal Tolerated Dose (MTD) of Panobinostat + ICE Phase II Number of Patients with Complete Remission (CR)                                                                                                                                                                                                                         | Phase 1 Phase 2 | 62  | 31-Jan-11 | 19-May-17 |

|       |             |                                                                                                                                                                                                                    |           |                                                                                                                                                                                                  |                                                                                                                                                                                                                                                                                      |                                                                                                                                                                                                                                                                                                                                                                                                                                                                                                                                                                                                                                                                                                                                                                                                                                          |                |     |            |           |
|-------|-------------|--------------------------------------------------------------------------------------------------------------------------------------------------------------------------------------------------------------------|-----------|--------------------------------------------------------------------------------------------------------------------------------------------------------------------------------------------------|--------------------------------------------------------------------------------------------------------------------------------------------------------------------------------------------------------------------------------------------------------------------------------------|------------------------------------------------------------------------------------------------------------------------------------------------------------------------------------------------------------------------------------------------------------------------------------------------------------------------------------------------------------------------------------------------------------------------------------------------------------------------------------------------------------------------------------------------------------------------------------------------------------------------------------------------------------------------------------------------------------------------------------------------------------------------------------------------------------------------------------------|----------------|-----|------------|-----------|
| G-CSF | NCT03619993 | Patient Preference for Pegfilgrastim (Neulasta®) Application Forms                                                                                                                                                 | Completed | Non Hodgkin Lymphoma Breast Cancer                                                                                                                                                               | Device: On-body injector Device: Pre-filled syringe                                                                                                                                                                                                                                  | Patient preference for type of pegfilgrastim application assessed via project specific survey answered after 4 applications. Time point of pegfilgrastim application within a chemotherapy cycle Patient preference for pegfilgrastim application assessed via project specific survey answered at time of enrollment Impact of type of pegfilgrastim application on daily life of the patient assessed by direct questioning using project specific patient survey. Percentage of nurses favoring pegfilgrastim application via On-body injector at study start and at end of study as stated via a project specific nurse survey Preference of investigators for either type of pegfilgrastim application at study start und at end of study assessed via project specific investigator survey Cost factors for the health care system | Not Applicable | 404 | 25-Jun-18  | 17-Dec-19 |
| G-CSF | NCT00550784 | Combination Chemotherapy and Autologous Peripheral Stem Cell Transplant in Treating Patients With Stage III, Stage IV, or Recurrent Ovarian Epithelial Cancer, Primary Peritoneal Cancer, or Fallopian Tube Cancer | Completed | Fallopian Tube Cancer Ovarian Cancer Peritoneal Cavity Cancer                                                                                                                                    | Biological: filgrastim Drug: cisplatin Drug: cyclophosphamide Drug: melphalan Drug: paclitaxel Drug: topotecan hydrochloride Genetic: TdT-mediated dUTP nick end labeling assay Genetic: gene expression analysis Other: immunohistochemistry staining method Other: pharmacological | Toxicity Tumor response Reason patient is removed from study Disease progression Overall survival Progression-free survival Time to progression                                                                                                                                                                                                                                                                                                                                                                                                                                                                                                                                                                                                                                                                                          | Phase 1        | 8   | Jan-01     | 7-Oct-14  |
| G-CSF | NCT00544570 | High-Dose Chemotherapy in Treating Patients Undergoing Stem Cell Transplant for Recurrent or Refractory Hodgkin's Lymphoma                                                                                         | Completed | Lymphoma                                                                                                                                                                                         | Biological: filgrastim Drug: carmustine Drug: cyclophosphamide Drug: etoposide Drug: melphalan Procedure: autologous hematopoietic stem cell transplantation Procedure: peripheral blood stem cell transplantation Radiation: radiation therapy Radiation: total-body irradiation    | Feasibility Toxicity as assessed by NCI CTC v2.0 Response rate Progression-free survival Overall survival Percentage of patients who achieve minimal disease status after 2 courses                                                                                                                                                                                                                                                                                                                                                                                                                                                                                                                                                                                                                                                      | Not Applicable | 30  | April 1998 | 9-Feb-10  |
| G-CSF | NCT00310089 | AZD2171 and Combination Chemotherapy in Treating Women With Locally Advanced Breast Cancer                                                                                                                         | Completed | Breast Cancer                                                                                                                                                                                    | Biological: filgrastim Biological: pegfilgrastim Drug: cediranib maleate Drug: cyclophosphamide Drug: docetaxel Drug: doxorubicin hydrochloride Other: laboratory biomarker analysis Procedure: conventional surgery Procedure: neoadjuvant therapy                                  |                                                                                                                                                                                                                                                                                                                                                                                                                                                                                                                                                                                                                                                                                                                                                                                                                                          | Not Applicable | 33  | Jan-06     | 20-Jun-13 |
| G-CSF | NCT00290641 | Chemotherapy and Total-Body Irradiation Followed by Donor Umbilical Cord Blood Transplant, Cyclosporine, and Mycophenolate Mofetil in Treating Patients With Hematologic Cancer                                    | Completed | Chronic Myeloproliferative Disorders Leukemia Lymphoma Myelodysplastic Syndromes                                                                                                                 | Biological: filgrastim Biological: graft-versus-tumor induction therapy Drug: cyclophosphamide Drug: cyclosporine Drug: fludarabine phosphate Drug: mycophenolate mofetil Procedure: umbilical cord blood transplantation Radiation: radiation therapy                               | Engraftment as measured by an absolute neutrophil count of donor origin > 0.5 x 10 <sup>9</sup> /L for 3 days by day 42 Incidence and severity of acute or chronic graft-versus-host-disease, relapse, or mortality at day 100 Survival and event-free survival by Kaplan-Meier estimation at 1 and 2 years after umbilical cord blood (UCB) transplant                                                                                                                                                                                                                                                                                                                                                                                                                                                                                  | Not Applicable | 68  | April 2001 | 29-Nov-17 |
| G-CSF | NCT00255710 | Cyclophosphamide and/or Mycophenolate Mofetil With or Without Tacrolimus in Treating Patients Who Are Undergoing a Donor Bone Marrow or Peripheral Stem Cell Transplant for Hematologic                            | Completed | Chronic Myeloproliferative Disorders Graft Versus Host Disease Leukemia Lymphoma Multiple Myeloma and Plasma Cell Neoplasm Myelodysplastic Syndromes Myelodysplastic/Myeloproliferative Diseases | Biological: filgrastim Drug: cyclophosphamide Drug: fludarabine phosphate Drug: mycophenolate mofetil Drug: tacrolimus Procedure: allogeneic bone marrow transplantation Procedure: peripheral blood                                                                                 | Post-transplant immunosuppression regimen with ≤ 20% incidence of a grade II-IV graft-versus-host-disease (GVHD) and < 10% incidence of nonengraftment (< 5% donor chimerism) at day 60 following transplant Incidence and severity of acute GVHD at day 60 following transplant Frequency of mixed chimerism defined as any detectable donor cells at day 60 following transplant                                                                                                                                                                                                                                                                                                                                                                                                                                                       | Phase 1        | 60  | Jul-02     | 17-Mar-10 |
| G-CSF | NCT00004905 | Combination Chemotherapy Plus Peripheral Stem Cell Transplantation in Treating Patients With Chronic Myelogenous Leukemia or Acute Leukemia                                                                        | Completed | Leukemia                                                                                                                                                                                         | Biological: filgrastim Biological: recombinant interferon alfa Drug: cyclophosphamide Drug: cytarabine Drug: etoposide Drug: idarubicin Procedure: peripheral blood stem cell                                                                                                        |                                                                                                                                                                                                                                                                                                                                                                                                                                                                                                                                                                                                                                                                                                                                                                                                                                          | Phase 2        |     | Oct-99     | 30-May-13 |
| G-CSF | NCT00002791 | Chemotherapy Plus Radiation Therapy Followed by Surgery in Treating Patients With Soft Tissue Sarcoma                                                                                                              | Completed | Sarcoma                                                                                                                                                                                          | Biological: filgrastim Drug: dacarbazine Drug: doxorubicin hydrochloride Drug: ifosfamide Drug: mesna Procedure: conventional surgery Radiation: brachytherapy Radiation: intraoperative radiation therapy Radiation: radioisotope therapy                                           |                                                                                                                                                                                                                                                                                                                                                                                                                                                                                                                                                                                                                                                                                                                                                                                                                                          | Phase 2        |     | Feb-97     | 24-Jan-14 |

|       |             |                                                                                                                                                      |           |               |                                                                                                                                                                                                                                                                                                                                                                                                                                      |                 |     |            |                |
|-------|-------------|------------------------------------------------------------------------------------------------------------------------------------------------------|-----------|---------------|--------------------------------------------------------------------------------------------------------------------------------------------------------------------------------------------------------------------------------------------------------------------------------------------------------------------------------------------------------------------------------------------------------------------------------------|-----------------|-----|------------|----------------|
| G-CSF | NCT00002509 | High-Dose Combination Chemotherapy Followed by Peripheral Stem Cell Transplantation in Treating Patients With Poor-Prognosis Breast Cancer           | Completed | Breast Cancer | Biological: filgrastim Drug: carboplatin Drug: cyclophosphamide Drug: etoposide Drug: mesna Procedure: autologous bone marrow transplantation Procedure: peripheral blood stem cell transplantation                                                                                                                                                                                                                                  | Phase 1 Phase 2 |     | Nov-91     | 1-Oct-10       |
| G-CSF | NCT00002755 | Standard Chemotherapy Compared With High-Dose Combination Chemotherapy and Peripheral Stem Cell Transplantation in Treating Women With Breast Cancer | Completed | Breast Cancer | Biological: filgrastim Drug: CMF regimen Drug: cyclophosphamide Drug: doxorubicin hydrochloride Drug: fluorouracil Drug: methotrexate Drug: tamoxifen citrate Drug: thiotepa Procedure: autologous bone marrow transplantation Procedure: peripheral blood stem cell transplantation Radiation: low-LET cobalt-60 gamma ray therapy Radiation:                                                                                       | Phase 3         | 600 | Nov-95     | 6-Nov-13       |
| G-CSF | NCT00004906 | Combination Chemotherapy and Peripheral Stem Cell Transplantation in Treating Women With Metastatic Breast Cancer                                    | Completed | Breast Cancer | Biological: filgrastim Drug: anastrozole Drug: carboplatin Drug: cisplatin Drug: cyclophosphamide Drug: docetaxel Drug: doxorubicin hydrochloride Drug: etoposide Drug: pamidronate disodium Drug: thiotepa Procedure: peripheral blood stem cell transplantation                                                                                                                                                                    | Phase 2         |     | Oct-99     | 30-May-13      |
| G-CSF | NCT00002634 | Chemotherapy, Radiation Therapy, Immunotherapy, and Bone Marrow Transplantation in Treating Patients With Neuroblastoma                              | Completed | Neuroblastoma | Biological: filgrastim Biological: monoclonal antibody 3F8 Drug: cisplatin Drug: cyclophosphamide Drug: doxorubicin hydrochloride Drug: etoposide Drug: mesna Drug: perfosamide Drug: vincristine sulfate Procedure: autologous bone marrow transplantation Procedure: in vitro-treated bone marrow transplantation Radiation: low-LET cobalt-60 gamma ray therapy Radiation: low-LET photon therapy Radiation: radioisotope therapy | Phase 2         | 45  | Feb-95     | 3-Jul-13       |
| G-CSF | NCT00004900 | Chemotherapy Plus Peripheral Stem Cell Transplantation in Treating Women With Metastatic Breast Cancer                                               | Completed | Breast Cancer | Biological: filgrastim Drug: anastrozole Drug: carboplatin Drug: cisplatin Drug: cyclophosphamide Drug: etoposide Drug: thiotepa Procedure: peripheral blood stem cell                                                                                                                                                                                                                                                               | Phase 2         |     | Oct-99     | 30-May-13      |
| G-CSF | NCT00003776 | Combination Chemotherapy and Surgery in Treating Patients With Newly Diagnosed Metastatic Osteosarcoma                                               | Completed | Sarcoma       | Biological: filgrastim Drug: cisplatin Drug: doxorubicin hydrochloride Drug: ifosfamide Drug: leucovorin calcium Drug: methotrexate Drug: trimetrexate glucuronate Procedure: surgical procedure                                                                                                                                                                                                                                     | Phase 2         |     | Dec-98     | 21-Jun-13      |
| G-CSF | NCT00002865 | High-Intensity, Brief-Duration Chemotherapy in Treating Patients With Relapsed or Refractory Acute Lymphocytic Leukemia                              | Completed | Leukemia      | Biological: filgrastim Drug: cyclophosphamide Drug: cytarabine Drug: dexamethasone Drug: doxorubicin hydrochloride Drug: etoposide Drug: ifosfamide Drug: leucovorin calcium Drug: mesna Drug: methotrexate Drug: therapeutic hydrocortisone Drug: vincristine sulfate Radiation: low-LET cobalt-60 gamma ray therapy Radiation: low-LET                                                                                             | Phase 2         | 25  | April 1995 | 10-Aug-18      |
| G-CSF | NCT00003957 | Combination Chemotherapy Plus Peripheral Stem Cell Transplantation in Treating Patients With Relapsed Non-Hodgkin's Lymphoma                         | Completed | Lymphoma      | Biological: filgrastim Biological: recombinant human stem cell factor Drug: cyclophosphamide Drug: cytarabine Drug: etoposide Drug: melphalan Drug: mitoxantrone hydrochloride Drug: paclitaxel Procedure: peripheral blood stem                                                                                                                                                                                                     | Phase 2         | 3   | Dec-98     | April 17, 2013 |

|       |             |                                                                                                                                                     |           |                                             |                                                                                                                                                                                                                                                                                                                                                                                                                                                                                                                   |                     |         |        |           |
|-------|-------------|-----------------------------------------------------------------------------------------------------------------------------------------------------|-----------|---------------------------------------------|-------------------------------------------------------------------------------------------------------------------------------------------------------------------------------------------------------------------------------------------------------------------------------------------------------------------------------------------------------------------------------------------------------------------------------------------------------------------------------------------------------------------|---------------------|---------|--------|-----------|
| G-CSF | NCT00003413 | Combination Chemotherapy Plus Peripheral Stem Cell Transplantation in Treating Patients With Stage III or Stage IV Ovarian Epithelial Cancer        | Completed | Ovarian Cancer                              | Biological: filgrastim Drug: carmustine Drug: cisplatin Drug: melphalan Drug: paclitaxel Procedure: peripheral blood stem cell transplantation Procedure: surgical procedure                                                                                                                                                                                                                                                                                                                                      | Phase 2             | 32      | Sep-98 | 17-Oct-19 |
| G-CSF | NCT00002675 | Chemotherapy in Treating Patients With Retinoblastoma                                                                                               | Completed | Retinoblastoma                              | Biological: filgrastim Drug: carboplatin Drug: cisplatin Drug: cyclophosphamide Drug: etoposide Drug: mesna Drug: vincristine                                                                                                                                                                                                                                                                                                                                                                                     | Phase 2             | 50      | May-95 | 28-Jun-13 |
| G-CSF | NCT00003877 | Peripheral Stem Cell Transplantation With or Without Stromagen Following Chemotherapy in Treating Women With Metastatic Breast Cancer               | Completed | Breast Cancer                               | Biological: filgrastim Drug: carboplatin Drug: cyclophosphamide Drug: paclitaxel Drug: thiotepa Procedure: in vitro-treated bone marrow transplantation Procedure: in vitro-treated peripheral blood stem cell                                                                                                                                                                                                                                                                                                    | Phase 1 Phase 2     | 30      | Sep-98 | 7-Mar-11  |
| G-CSF | NCT00002704 | Radiation Therapy and Chemotherapy in Treating Children With CNS Relapse From Acute Lymphoblastic Leukemia                                          | Completed | Leukemia                                    | Biological: filgrastim Drug: asparaginase Drug: cyclophosphamide Drug: daunorubicin hydrochloride Drug: dexamethasone Drug: etoposide Drug: leucovorin calcium Drug: liposomal cytarabine Drug: mercaptopurine Drug: mesna Drug: methotrexate Drug: therapeutic hydrocortisone Drug: thiotepa Drug:                                                                                                                                                                                                               | Phase 2             | 156     | Jan-96 | 1-Feb-13  |
| G-CSF | NCT00002691 | Combination Chemotherapy in Treating Pediatric Patients With Stage III or IV Non-Hodgkin's Lymphoma                                                 | Completed | Lymphoma                                    | Biological: filgrastim Drug: asparaginase Drug: cyclophosphamide Drug: cytarabine Drug: daunorubicin hydrochloride Drug: dexamethasone Drug: etoposide Drug: leucovorin calcium Drug: mesna Drug:                                                                                                                                                                                                                                                                                                                 | Phase 2             |         | Aug-95 | 25-Jun-13 |
| G-CSF | NCT00002785 | Combination Chemotherapy, Bone Marrow Transplantation, and Radiation Therapy in Treating Infants With Acute Lymphoblastic Leukemia                  | Completed | Leukemia                                    | Biological: filgrastim Drug: asparaginase Drug: cyclophosphamide Drug: cyclosporine Drug: cytarabine Drug: daunorubicin hydrochloride Drug: dexamethasone Drug: etoposide Drug: leucovorin calcium Drug: mercaptopurine Drug: mesna Drug: methotrexate Drug: methylprednisolone Drug: pegaspargase Drug: prednisone Drug: therapeutic hydrocortisone Drug: vincristine sulfate Procedure: allogeneic bone marrow transplantation Radiation: low-LET cobalt-60 gamma ray therapy Radiation: low-LET photon therapy | Event Free Survival | Phase 2 | Jul-96 | 24-Jul-14 |
| G-CSF | NCT00004061 | Biological Therapy in Treating Patients Undergoing Radiation Therapy, Chemotherapy, and Peripheral Stem Cell Transplantation for Hematologic Cancer | Completed | Leukemia Lymphoma Oral Complications        | Biological: filgrastim Biological: palifermin Drug: cyclophosphamide Drug: etoposide Drug: ifosfamide Procedure: peripheral blood stem cell transplantation Procedure: quality-of-life                                                                                                                                                                                                                                                                                                                            | Phase 2             | 111     | May-99 | 26-Jun-13 |
| G-CSF | NCT00003187 | Bone Marrow Transplantation in Treating Patients With Leukemia, Myelodysplasia, or Lymphoblastic Lymphoma                                           | Completed | Leukemia Lymphoma Myelodysplastic Syndromes | Biological: filgrastim Drug: cyclophosphamide Drug: cyclosporine Drug: cytarabine Drug: methotrexate Drug: methylprednisolone Procedure: allogeneic bone marrow transplantation Procedure: in vitro-treated bone marrow transplantation Radiation: radiation therapy                                                                                                                                                                                                                                              | Phase 2 Phase 3     | 19      | May-95 | 24-Feb-10 |



|       |              |                                                                                                                                                              |           |                                                                                                                                       |                                                                                                                                                                                                                                                                                                                                                                                                                                                                             |                                                                                                                                        |                 |     |        |            |    |
|-------|--------------|--------------------------------------------------------------------------------------------------------------------------------------------------------------|-----------|---------------------------------------------------------------------------------------------------------------------------------------|-----------------------------------------------------------------------------------------------------------------------------------------------------------------------------------------------------------------------------------------------------------------------------------------------------------------------------------------------------------------------------------------------------------------------------------------------------------------------------|----------------------------------------------------------------------------------------------------------------------------------------|-----------------|-----|--------|------------|----|
| G-CSF | NCT00002552  | Chemotherapy Plus Bone Marrow Transplantation in Treating Patients With Refractory Non-Hodgkin's Lymphoma, Hodgkin's Disease, or Multiple Myeloma            | Completed | Lymphoma Multiple Myeloma and Plasma Cell Neoplasm                                                                                    | Biological: filgrastim Biological: sargramostim Drug: carmustine Drug: cyclophosphamide Drug: cytarabine Drug: etoposide Drug: leucovorin calcium Drug: methotrexate Drug: perfosfamide Drug: therapeutic hydrocortisone Procedure: allogeneic bone marrow transplantation Procedure: autologous bone marrow transplantation Procedure: in vitro-treated bone marrow transplantation Procedure: peripheral blood stem cell transplantation Procedure: syngeneic bone marrow |                                                                                                                                        | Phase 2         | 40  | Oct-93 | April 2013 | 9, |
| G-CSF | NCT00003101  | Combination Chemotherapy and Bone Marrow Transplantation or Peripheral Stem Cell Transplantation in Treating Patients With Oligodendroglioma                 | Completed | Brain and Central Nervous System Tumors                                                                                               | Biological: filgrastim Drug: busulfan Drug: lomustine Drug: procarbazine hydrochloride Drug: thiotepa Drug: vincristine sulfate Procedure: autologous bone marrow transplantation Procedure: peripheral blood stem cell transplantation                                                                                                                                                                                                                                     |                                                                                                                                        | Phase 2         | 60  | Aug-97 | 25-Jun-13  |    |
| G-CSF | NCT00004132  | Growth Factor to Prevent Oral Mucositis in Patients With Hematologic Cancer                                                                                  | Completed | Drug/Agent Toxicity by Tissue/Organ Leukemia Lymphoma Multiple Myeloma and Plasma Cell Neoplasm Oral Complications Radiation Toxicity | Biological: filgrastim Biological: palifermin Drug: cyclophosphamide Drug: etoposide Drug: ifosfamide Procedure: quality-of-life assessment Radiation:                                                                                                                                                                                                                                                                                                                      |                                                                                                                                        | Phase 2         |     | Jan-00 | 26-Jun-13  |    |
| G-CSF | NCT00003972  | Combination Chemotherapy and Peripheral Stem Cell Transplantation in Treating Patients With Stage II or Stage IIIA Breast Cancer                             | Completed | Breast Cancer                                                                                                                         | Biological: filgrastim Biological: sargramostim Drug: busulfan Drug: carboplatin Drug: cyclophosphamide Drug: melphalan Drug: paclitaxel Drug: tamoxifen citrate Drug: thiotepa Procedure: peripheral blood stem cell transplantation Radiation: radiation therapy                                                                                                                                                                                                          |                                                                                                                                        | Phase 3         | 280 | Jul-98 | April 2010 | 2, |
| G-CSF | NCT00002680  | Sequential High-Dose Chemotherapy and Stem Cell Transplantation in Treating Patients With Chemotherapy-Sensitive Metastatic Breast Cancer                    | Completed | Breast Cancer                                                                                                                         | Biological: filgrastim Drug: cyclophosphamide Drug: megestrol acetate Drug: melphalan Drug: tamoxifen citrate Drug: thiotepa Procedure: conventional surgery Procedure: peripheral blood stem cell transplantation Radiation:                                                                                                                                                                                                                                               |                                                                                                                                        | Phase 2         | 40  | Feb-94 | 24-Jul-13  |    |
| G-CSF | NCT00003899  | Chemotherapy Plus Bone Marrow or Peripheral Stem Cell Transplantation in Treating Patients With Recurrent or Refractory Solid Tumors                         | Completed | Unspecified Adult Solid Tumor, Protocol Specific                                                                                      | Biological: filgrastim Drug: cyclophosphamide Drug: melphalan Drug: paclitaxel Drug: thiotepa Procedure: autologous bone marrow transplantation Procedure: peripheral blood                                                                                                                                                                                                                                                                                                 |                                                                                                                                        | Phase 1         |     | Jan-99 | 4-Oct-16   |    |
| G-CSF | NCT000080795 | Neoadjuvant Ifosfamide, Doxorubicin, Gemcitabine, and Cisplatin in Treating Patients Who Are Undergoing Radical Cystectomy for Locally Advanced Carcinoma    | Completed | Bladder Cancer Transitional Cell Cancer of the Renal Pelvis and Ureter Urethral Cancer                                                | Biological: filgrastim Drug: cisplatin Drug: doxorubicin hydrochloride Drug: gemcitabine hydrochloride Drug: ifosfamide Procedure: conventional surgery Procedure: neoadjuvant therapy                                                                                                                                                                                                                                                                                      | Response rate Disease-free survival at 4 years Comparison of perioperative treatment morbidity and mortality with historical standards | Phase 2         | 65  | Jul-01 | 22-Oct-12  |    |
| G-CSF | NCT00003632  | Combination Chemotherapy Plus Peripheral Stem Cell Transplantation in Treating Patients With Newly Diagnosed Central Nervous System                          | Completed | Lymphoma                                                                                                                              | Biological: filgrastim Drug: carmustine Drug: cytarabine Drug: etoposide Drug: melphalan Drug: methotrexate Procedure: peripheral blood stem cell transplantation                                                                                                                                                                                                                                                                                                           |                                                                                                                                        | Phase 2         | 30  | Sep-98 | 16-Jan-13  |    |
| G-CSF | NCT00002868  | Interferon-alfa With or Without Chemotherapy and Peripheral Stem Cell Transplantation in Treating Patients With Newly Diagnosed Chronic Myelogenous Leukemia | Completed | Leukemia                                                                                                                              | Biological: filgrastim Biological: recombinant interferon alfa Drug: busulfan Drug: cytarabine Drug: etoposide Drug: hydroxyurea Drug: idarubicin Procedure: peripheral blood stem cell transplantation                                                                                                                                                                                                                                                                     |                                                                                                                                        | Phase 3         | 744 | Jan-96 | 10-Feb-15  |    |
| G-CSF | NCT00003541  | Combination Chemotherapy, Radiation Therapy, and Peripheral Stem Cell Transplantation in Treating Patients With Stage III or Stage IV Mantle Cell Lymphoma   | Completed | Lymphoma                                                                                                                              | Biological: filgrastim Drug: CHOP regimen Drug: carboplatin Drug: cyclophosphamide Drug: doxorubicin hydrochloride Drug: etoposide Drug: ifosfamide Drug: prednisone Drug: vincristine sulfate Procedure: peripheral                                                                                                                                                                                                                                                        |                                                                                                                                        | Phase 1 Phase 2 | 24  | Jun-98 | 24-Jun-13  |    |
| G-CSF | NCT00005978  | N99-01: Combination Chemotherapy, Radiation Therapy, and Stem Cell Transplantation in Treating Patients With Neuroblastoma                                   | Completed | Neuroblastoma                                                                                                                         | Biological: filgrastim Drug: carboplatin Drug: etoposide Drug: melphalan Procedure: autologous bone marrow transplantation Procedure: peripheral blood stem cell transplantation Radiation: iobenguane 1 131I Radiation: radiation                                                                                                                                                                                                                                          |                                                                                                                                        | Phase 1         |     | May-00 | 15-Oct-10  |    |

|       |             |                                                                                                                                                                                            |           |                                                     |                                                                                                                                                                                                                                                                                                                                                  |                                                                                                                                                                                                                                                                                                                                                                                                   |                 |     |            |                |
|-------|-------------|--------------------------------------------------------------------------------------------------------------------------------------------------------------------------------------------|-----------|-----------------------------------------------------|--------------------------------------------------------------------------------------------------------------------------------------------------------------------------------------------------------------------------------------------------------------------------------------------------------------------------------------------------|---------------------------------------------------------------------------------------------------------------------------------------------------------------------------------------------------------------------------------------------------------------------------------------------------------------------------------------------------------------------------------------------------|-----------------|-----|------------|----------------|
| G-CSF | NCT00074178 | Methotrexate, Cyclophosphamide, and Etoposide Phosphate Given With Osmotic Blood-Brain Barrier Disruption Plus Dexamethasone and Cytarabine in Treating Patients With Primary CNS Lymphoma | Completed | Lymphoma                                            | Biological: filgrastim Biological: pegfilgrastim Drug: cyclophosphamide Drug: cytarabine Drug: dexamethasone Drug: etoposide phosphate Drug: methotrexate                                                                                                                                                                                        | Survival as measured by clinical and radiographic response at 5 years after study treatment Overall survival as measured by clinical and radiographic response Progression-free survival as measured by clinical and radiographic response until tumor progression Quality of Life (QOL) as measured by EORTC QOL before and after study treatment, every 6 months for 2 years, and then annually | Phase 2         | 22  | Jan-00     | April 21, 2017 |
| G-CSF | NCT00003388 | Combination Chemotherapy in Treating Patients With AIDS-Related Lymphoma                                                                                                                   | Completed | Lymphoma                                            | Biological: filgrastim Drug: cyclophosphamide Drug: cytarabine Drug: methotrexate Drug: pegylated liposomal doxorubicin hydrochloride Drug: prednisone Drug: vincristine                                                                                                                                                                         |                                                                                                                                                                                                                                                                                                                                                                                                   | Phase 2         | 38  | Feb-99     | 27-Jan-10      |
| G-CSF | NCT00023738 | Chemotherapy, SU5416, Radiation Therapy, and Surgery in Treating Patients With Soft Tissue Sarcoma                                                                                         | Completed | Sarcoma                                             | Biological: filgrastim Drug: dacarbazine Drug: doxorubicin hydrochloride Drug: ifosfamide Drug: semaxanib Procedure: conventional                                                                                                                                                                                                                |                                                                                                                                                                                                                                                                                                                                                                                                   | Phase 1 Phase 2 |     | Aug-01     | 24-Jun-13      |
| G-CSF | NCT00017368 | Combination Chemotherapy Plus Peripheral Stem Cell Transplantation in Treating Children With Newly Diagnosed Neuroblastoma                                                                 | Completed | Neuroblastoma                                       | Biological: filgrastim Biological: sargramostim Drug: carboplatin Drug: cisplatin Drug: cyclophosphamide Drug: doxorubicin hydrochloride Drug: etoposide Drug: etoposide phosphate Drug: ifosfamide Drug: isotretinoin Drug: melphalan Drug: thiotepa Drug: vincristine sulfate Procedure: conventional surgery Procedure: peripheral blood stem | Transplant-related mortality Incidence of symptomatic CMV, disseminated adenovirus infection, or EBV-LPD Event-free Survival                                                                                                                                                                                                                                                                      | Phase 2         | 42  | April 2001 | 13-Feb-14      |
| G-CSF | NCT00002638 | Combination Chemotherapy Followed by Peripheral Stem Cell Transplantation in Treating Children With Relapsed Acute Lymphocytic Leukemia                                                    | Completed | Leukemia                                            | Biological: filgrastim Biological: sargramostim Drug: carmustine Drug: cyclophosphamide Drug: cytarabine Drug: etoposide Procedure: peripheral blood stem cell transplantation Radiation:                                                                                                                                                        |                                                                                                                                                                                                                                                                                                                                                                                                   | Phase 2         | 30  | Mar-95     | 10-Jul-13      |
| G-CSF | NCT00004006 | Combination Chemotherapy, Radiation Therapy, and Bone Marrow Transplantation in Treating Patients With Retinoblastoma                                                                      | Completed | Retinoblastoma                                      | Biological: filgrastim Drug: carboplatin Drug: cyclophosphamide Drug: doxorubicin hydrochloride Drug: etoposide Drug: topotecan hydrochloride Procedure: autologous bone marrow transplantation Radiation: radiation therapy                                                                                                                     |                                                                                                                                                                                                                                                                                                                                                                                                   | Phase 2         | 4   | Nov-97     | 4-Oct-11       |
| G-CSF | NCT00002643 | Combination Chemotherapy in Treating Patients With Newly Diagnosed Metastatic Ewing's Sarcoma or Primitive Neuroectodermal Tumor                                                           | Completed | Neutropenia Sarcoma                                 | Biological: filgrastim Drug: amifostine trihydrate Drug: cyclophosphamide Drug: doxorubicin hydrochloride Drug: etoposide Drug: ifosfamide Drug: topotecan hydrochloride Drug: vincristine sulfate Procedure: conventional surgery Radiation: low-LET cobalt-60 gamma ray therapy Radiation: low-LET                                             |                                                                                                                                                                                                                                                                                                                                                                                                   | Phase 2         | 130 | April 1995 | 1-Feb-13       |
| G-CSF | NCT00052923 | Stem Cell Transplantation With or Without Rituximab in Treating Patients With Relapsed or Progressive B-Cell Diffuse Large Cell                                                            | Completed | Lymphoma                                            | Biological: filgrastim Biological: rituximab Drug: carmustine Drug: cyclophosphamide Drug: etoposide Procedure: peripheral blood                                                                                                                                                                                                                 | Progression-free survival Procedure-related mortality Overall survival Potential infectious complications of the addition of rituximab to autologous stem cell transplantation                                                                                                                                                                                                                    | Phase 3         | 427 | Mar-03     | 9-Feb-09       |
| G-CSF | NCT00046852 | Chemotherapy and Peripheral Stem Cell Transplantation Followed By Immunotherapy in Treating Patients With Multiple Myeloma                                                                 | Completed | Infection Multiple Myeloma and Plasma Cell Neoplasm | Biological: filgrastim Biological: pneumococcal polyvalent vaccine Biological: therapeutic autologous lymphocytes Biological: therapeutic tumor infiltrating lymphocytes Drug: carmustine Drug: cyclophosphamide Drug: melphalan Procedure: bone marrow ablation with stem cell support Procedure:                                               |                                                                                                                                                                                                                                                                                                                                                                                                   | Phase 1 Phase 2 |     | Dec-01     | 4-Nov-19       |

|       |             |                                                                                                                                                                                              |           |                                         |                                                                                                                                                                                                                                                                                                                                                                                                                                                                                                                                                                                                                     |                                                                                                                                                                                                                                                                                                                                                                                                                                                        |         |      |        |           |
|-------|-------------|----------------------------------------------------------------------------------------------------------------------------------------------------------------------------------------------|-----------|-----------------------------------------|---------------------------------------------------------------------------------------------------------------------------------------------------------------------------------------------------------------------------------------------------------------------------------------------------------------------------------------------------------------------------------------------------------------------------------------------------------------------------------------------------------------------------------------------------------------------------------------------------------------------|--------------------------------------------------------------------------------------------------------------------------------------------------------------------------------------------------------------------------------------------------------------------------------------------------------------------------------------------------------------------------------------------------------------------------------------------------------|---------|------|--------|-----------|
| G-CSF | NCT00040872 | Multiple Therapies in Treating Patients With Advanced Neuroblastoma                                                                                                                          | Completed | Neuroblastoma                           | Biological: filgrastim Biological: monoclonal antibody 3F8 Biological: sargramostim Drug: carboplatin Drug: cisplatin Drug: cyclophosphamide Drug: doxorubicin hydrochloride Drug: etoposide Drug: isotretinoin Drug: thiotepa Drug: topotecan hydrochloride Drug: vincristine sulfate Procedure: autologous bone marrow transplantation Procedure: bone marrow ablation with stem cell support Procedure: conventional surgery Procedure: drug resistance inhibition treatment Procedure: peripheral blood stem cell transplantation Procedure: syngeneic bone marrow transplantation Radiation: radiation therapy |                                                                                                                                                                                                                                                                                                                                                                                                                                                        | Phase 2 |      | Jun-00 | 7-Mar-13  |
| G-CSF | NCT00040690 | Combination Chemotherapy in Treating Patients With Burkitt's Lymphoma or Burkitt's Leukemia                                                                                                  | Completed | Leukemia Lymphoma                       | Biological: filgrastim Drug: cyclophosphamide Drug: cytarabine Drug: doxorubicin hydrochloride Drug: etoposide Drug: ifosfamide Drug: leucovorin calcium Drug: methotrexate Drug: vincristine sulfate Radiation: radiation therapy                                                                                                                                                                                                                                                                                                                                                                                  | Progression-free survival Survival time                                                                                                                                                                                                                                                                                                                                                                                                                | Phase 2 | 120  | Nov-08 | 19-Dec-13 |
| G-CSF | NCT00025649 | Combination Chemotherapy Followed by Surgery and Peripheral Stem Cell or Bone Marrow Transplantation in Treating Infants With Newly Diagnosed Neuroblastoma                                  | Completed | Neuroblastoma                           | Biological: filgrastim Drug: busulfan Drug: carboplatin Drug: cyclophosphamide Drug: doxorubicin hydrochloride Drug: etoposide Drug: melphalan Drug: vincristine sulfate Procedure: autologous bone marrow transplantation Procedure: conventional surgery Procedure: peripheral blood stem cell transplantation                                                                                                                                                                                                                                                                                                    |                                                                                                                                                                                                                                                                                                                                                                                                                                                        | Phase 2 |      | Jul-99 | 17-Sep-13 |
| G-CSF | NCT00025077 | Combination Chemotherapy, Surgery or Radiation Therapy, and Peripheral Stem Cell Transplant in Treating Patients With Recurrent Medulloblastoma or Primitive                                 | Completed | Brain and Central Nervous System Tumors | Biological: filgrastim Drug: carboplatin Drug: cyclophosphamide Drug: thiotepa Procedure: conventional surgery Procedure: peripheral blood stem cell transplantation Radiation: radiation                                                                                                                                                                                                                                                                                                                                                                                                                           | Event-free survival Toxic death rate                                                                                                                                                                                                                                                                                                                                                                                                                   | Phase 2 | 50   | Jan-00 | 2-Aug-13  |
| G-CSF | NCT00017225 | Chemotherapy and Radiation Therapy With or Without Peripheral Stem Cell Transplantation in Treating Patients With Neuroblastoma                                                              | Completed | Neuroblastoma                           | Biological: filgrastim Drug: carboplatin Drug: cisplatin Drug: cyclophosphamide Drug: dacarbazine Drug: doxorubicin hydrochloride Drug: etoposide Drug: ifosfamide Drug: melphalan Drug: tretinoin Drug: vincristine sulfate Drug: vindesine Procedure: autologous bone marrow transplantation Procedure: conventional surgery Procedure: peripheral blood stem cell transplantation Radiation: radiation therapy                                                                                                                                                                                                   |                                                                                                                                                                                                                                                                                                                                                                                                                                                        | Phase 2 |      | May-97 | 2-Aug-13  |
| G-CSF | NCT00017095 | Biomarker (p53 Gene) Analysis and Combination Chemotherapy Followed by Radiation Therapy and Surgery in Treating Women With Large Operable or Locally Advanced or Inflammatory Breast Cancer | Completed | Breast Cancer                           | Biological: filgrastim Drug: cyclophosphamide Drug: docetaxel Drug: epirubicin hydrochloride Drug: fluorouracil Genetic: microarray analysis Other: immunohistochemistry staining method Other: laboratory biomarker analysis Procedure: biopsy Procedure: conventional surgery Procedure: neoadjuvant                                                                                                                                                                                                                                                                                                              | Progression-free survival Distant metastasis-free survival Overall survival Clinical and pathological responses Clinical response according to RECIST criteria without pathologic response Toxicity according to CTC v2.0 Agreement between p53 assessment by IHC method and functional test in yeast by analyzing the correlation between p52 and tumor status after 3 and 6 cycles of chemotherapy Tumor assessment using cDNA microarray technology | Phase 3 | 1856 | Mar-01 | 24-Oct-13 |

|       |             |                                                                                                                                                                           |           |                                                                                                                                   |                                                                                                                                                                                                                                                                                                                                                                                                                                  |                                                                                                                                                                 |         |     |            |           |
|-------|-------------|---------------------------------------------------------------------------------------------------------------------------------------------------------------------------|-----------|-----------------------------------------------------------------------------------------------------------------------------------|----------------------------------------------------------------------------------------------------------------------------------------------------------------------------------------------------------------------------------------------------------------------------------------------------------------------------------------------------------------------------------------------------------------------------------|-----------------------------------------------------------------------------------------------------------------------------------------------------------------|---------|-----|------------|-----------|
| G-CSF | NCT00012051 | Chemotherapy and Peripheral Stem Cell Transplant With or Without Monoclonal Antibody Therapy in Treating Patients With Non-Hodgkin's Lymphoma                             | Completed | Lymphoma                                                                                                                          | Biological: rituximab Drug: cisplatin Drug: ifosfamide Drug: methotrexate Procedure: bone marrow ablation with stem cell support Procedure: peripheral blood stem cell                                                                                                                                                                                                                                                           | Overall survival Response rate Event-free survival                                                                                                              | Phase 3 | 340 | Sep-00     | 12-Aug-13 |
| G-CSF | NCT00008008 | Thiotepa Followed by Peripheral Stem Cell or Bone Marrow Transplant in Treating Patients With Malignant Glioma                                                            | Completed | Brain and Central Nervous System Tumors                                                                                           | Biological: sargramostim Drug: cyclophosphamide Drug: thiotepa Procedure: autologous bone marrow transplantation Procedure: bone marrow ablation with stem cell                                                                                                                                                                                                                                                                  | Response rate Disease-free interval Overall survival Toxicity Pharmacokinetics Presence of high-dose thiotepa in the cerebrospinal fluid                        | Phase 2 | 40  | Sep-97     | 4-Feb-13  |
| G-CSF | NCT00007995 | Chemotherapy Plus Peripheral Stem Cell Transplant in Treating Patients Who Have Multiple Myeloma or Primary Systemic Amyloidosis                                          | Completed | Multiple Myeloma and Plasma Cell Neoplasm                                                                                         | Biological: filgrastim Biological: recombinant interferon alfa Biological: sargramostim Drug: busulfan Drug: cyclophosphamide Drug: melphalan Procedure: autologous bone marrow transplantation Procedure: bone marrow ablation with stem cell                                                                                                                                                                                   | Disease-free survival at 2 years (patients with responsive disease) Duration of hematologic toxicity Time to an absolute neutrophil count Platelet independence | Phase 2 | 75  | Jul-99     | 4-Feb-13  |
| G-CSF | NCT00007982 | Chemotherapy Plus Peripheral Stem Cell Transplant in Treating Patients With Central Nervous System Cancer                                                                 | Completed | Brain and Central Nervous System Tumors Head and Neck Cancer Lymphoma                                                             | Biological: filgrastim Drug: carmustine Drug: cisplatin Drug: cyclophosphamide Drug: etoposide Drug: thiotepa Procedure: adjuvant therapy Procedure: autologous bone marrow transplantation Procedure: bone marrow ablation with stem cell support Procedure: peripheral blood stem cell                                                                                                                                         | Response rate Disease-free survival Overall survival Toxicity Quality of life                                                                                   | Phase 2 | 30  | April 1999 | 4-Feb-13  |
| G-CSF | NCT00006258 | Combination Chemotherapy Followed by Radiation Therapy in Treating Patients With Medulloblastoma, Supratentorial Primitive Neuroectodermal Tumor, or                      | Completed | Brain and Central Nervous System Tumors                                                                                           | Biological: filgrastim Drug: cisplatin Drug: cyclophosphamide Drug: etoposide Drug: methotrexate Drug: vincristine sulfate Procedure: adjuvant therapy Radiation: radiation therapy                                                                                                                                                                                                                                              |                                                                                                                                                                 | Phase 2 |     | Nov-97     | 18-Jul-13 |
| G-CSF | NCT00006042 | Cyclophosphamide Plus Bone Marrow Transplantation in Treating Patients With Hematologic Cancer                                                                            | Completed | Leukemia Lymphoma Multiple Myeloma and Plasma Cell Neoplasm Myelodysplastic Syndromes Myelodysplastic/Myeloproliferative Diseases | Biological: filgrastim Drug: cyclophosphamide Drug: fludarabine phosphate Drug: mycophenolate mofetil Drug: tacrolimus Procedure: allogeneic bone marrow                                                                                                                                                                                                                                                                         |                                                                                                                                                                 | Phase 1 |     | Dec-99     | 10-Mar-10 |
| G-CSF | NCT00004921 | High-Dose Chemotherapy Compared With Standard Chemotherapy in Treating Patients With Stage III or Stage IV Ovarian Epithelial Cancer That Has Been Removed During Surgery | Completed | Ovarian Cancer                                                                                                                    | Biological: filgrastim Drug: carboplatin Drug: cyclophosphamide Drug: melphalan Drug: paclitaxel Procedure: adjuvant therapy Procedure: bone marrow ablation with stem cell support Procedure: peripheral blood stem cell transplantation                                                                                                                                                                                        |                                                                                                                                                                 | Phase 3 |     | Sep-98     | 17-Sep-13 |
| G-CSF | NCT00003727 | Chemotherapy and Peripheral Stem Cell Transplantation Followed by Immunotherapy in Treating Patients With Chronic Myelogenous Leukemia                                    | Completed | Leukemia                                                                                                                          | Biological: filgrastim Biological: recombinant interferon alfa Biological: sargramostim Biological: therapeutic autologous lymphocytes Drug: carmustine Drug: cyclophosphamide Drug: etoposide Drug: gemcitabine hydrochloride Drug: melphalan Procedure: bone marrow ablation with stem cell                                                                                                                                    | Response (i.e., major cytogenetic or molecular response) within 12 months after completion of study therapy Mortality rate                                      | Phase 2 | 22  | Mar-99     | 4-Nov-19  |
| G-CSF | NCT00003309 | Combination Chemotherapy Plus Radiation Therapy in Treating Adult Patients With Brain Cancer                                                                              | Completed | Brain and Central Nervous System Tumors                                                                                           | Biological: filgrastim Drug: cisplatin Drug: cyclophosphamide Drug: etoposide Drug: vincristine sulfate Procedure: adjuvant therapy Radiation: radiation therapy                                                                                                                                                                                                                                                                 |                                                                                                                                                                 | Phase 2 | 33  | Jul-98     | 27-Jan-10 |
| G-CSF | NCT00003215 | Combination Chemotherapy Plus Peripheral Stem Cell Transplantation in Treating Patients With Newly Diagnosed Aggressive Non-Hodgkin's Lymphoma                            | Completed | Lymphoma                                                                                                                          | Biological: filgrastim Drug: CHOP regimen Drug: cyclophosphamide Drug: cytarabine Drug: doxorubicin hydrochloride Drug: etoposide Drug: leucovorin calcium Drug: melphalan Drug: methotrexate Drug: methylprednisolone Drug: mitoxantrone hydrochloride Drug: prednisone Drug: therapeutic hydrocortisone Drug: vincristine sulfate Procedure: bone marrow ablation with stem cell support Procedure: peripheral blood stem cell |                                                                                                                                                                 | Phase 3 | 400 | April 1997 | 15-May-12 |

|       |              |                                                                                                                                                                    |           |                                                                                                                                                                                                |                                                                                                                                                                                                                                                                                                                               |                                                                                                                                                                                                                                                                                                                                                                                                                                                                             |                |     |        |           |
|-------|--------------|--------------------------------------------------------------------------------------------------------------------------------------------------------------------|-----------|------------------------------------------------------------------------------------------------------------------------------------------------------------------------------------------------|-------------------------------------------------------------------------------------------------------------------------------------------------------------------------------------------------------------------------------------------------------------------------------------------------------------------------------|-----------------------------------------------------------------------------------------------------------------------------------------------------------------------------------------------------------------------------------------------------------------------------------------------------------------------------------------------------------------------------------------------------------------------------------------------------------------------------|----------------|-----|--------|-----------|
| G-CSF | NCT00003119  | Surgery in Treating Children With Neuroblastoma                                                                                                                    | Completed | Neuroblastoma                                                                                                                                                                                  | Biological: filgrastim Biological: sargramostim Drug: carboplatin Drug: cyclophosphamide Drug: doxorubicin hydrochloride Drug: etoposide Procedure: adjuvant therapy Procedure: conventional surgery Radiation: radiation therapy                                                                                             | Estimate the 3 year survival rate for low risk asymptomatic stage 2A/2B patients who are treated with surgery alone                                                                                                                                                                                                                                                                                                                                                         | Phase 3        | 968 | Mar-98 | 13-Mar-17 |
| G-CSF | NCT00002982  | Combination Chemotherapy and Peripheral Stem Cell Transplantation in Treating Older Patients With Refractory or Relapsed Intermediate-Grade Non-Hodgkin's Lymphoma | Completed | Lymphoma                                                                                                                                                                                       | Biological: filgrastim Drug: carboplatin Drug: carmustine Drug: cytarabine Drug: etoposide Drug: ifosfamide Drug: melphalan Procedure: autologous bone marrow transplantation Procedure: peripheral blood stem cell transplantation Radiation: radiation therapy                                                              | Treatment-related toxicity Efficacy in terms of 2-year disease-free survival                                                                                                                                                                                                                                                                                                                                                                                                | Phase 2        |     | Jan-97 | 3-Jul-13  |
| G-CSF | NCT00002854  | High-Dose Combination Chemotherapy Plus Peripheral Stem Cell Transplantation in Treating Patients With Advanced Cancer                                             | Completed | Cancer                                                                                                                                                                                         | Biological: filgrastim Drug: carboplatin Drug: cisplatin Drug: cyclophosphamide Drug: etoposide Drug: ifosfamide Drug: mesna Drug: paclitaxel Procedure: peripheral blood stem cell transplantation                                                                                                                           | Feasibility of two cycles of high dose chemotherapy with stem cell reinfusion Toxicity of two cycles of high dose chemotherapy and stem cell reinfusion Maximum tolerated dose of two cycles of high dose chemotherapy and stem cell reinfusion                                                                                                                                                                                                                             | Phase 1        | 33  | Dec-94 | 26-Aug-15 |
| G-CSF | NCT00002756  | Induction Intensification in Treating Infants With Newly Diagnosed Acute Lymphoblastic Leukemia                                                                    | Completed | Leukemia                                                                                                                                                                                       | Biological: filgrastim Drug: asparaginase Drug: cyclophosphamide Drug: cytarabine Drug: daunorubicin hydrochloride Drug: etoposide Drug: leucovorin calcium Drug: mercaptopurine Drug: methotrexate Drug: expression                                                                                                          | Feasibility of intensification Event-free survival Comparison of event-free survival rates in infants with and without leukemic blasts translocations Correlation of minimal residual disease at completion of induction, beginning of continuation, and at completion of therapy with patient outcome Clinical prognostic features associated with outcome Correlation of biologic characteristics of leukemia cells at diagnosis with outcome Patterns of gene expression | Phase 2        | 221 | Jun-96 | 14-Feb-14 |
| G-CSF | NCT00002697  | Combination Chemotherapy Plus Radiation Therapy Followed by Peripheral Stem Cell Transplantation in Treating Patients With Non-Hodgkin's Lymphoma                  | Completed | Lymphoma                                                                                                                                                                                       | Biological: filgrastim Biological: sargramostim Drug: carboplatin Drug: etoposide Drug: ifosfamide Procedure: autologous bone marrow transplantation Procedure: bone marrow ablation with stem cell support Procedure: peripheral blood stem cell                                                                             |                                                                                                                                                                                                                                                                                                                                                                                                                                                                             | Phase 2        |     | Sep-95 | 3-Jul-13  |
| G-CSF | NCT00002515  | Combination Chemotherapy Followed by Bone Marrow Transplantation in Treating Patients With Rare Cancer                                                             | Completed | Childhood Germ Cell Tumor Extragenadal Germ Cell Tumor Head and Neck Cancer Kidney Cancer Liver Cancer Lymphoma Neuroblastoma Ovarian Cancer Retinoblastoma Sarcoma Testicular Germ Cell Tumor | Biological: filgrastim Drug: carboplatin Drug: thiotepa Drug: topotecan hydrochloride Procedure: autologous bone marrow transplantation Procedure: bone marrow ablation with stem cell support Procedure: in vitro-treated bone                                                                                               |                                                                                                                                                                                                                                                                                                                                                                                                                                                                             | Phase 2        |     | Oct-92 | 24-Jun-13 |
| G-CSF | NCT00296023  | Donor Stem Cell Transplant in Treating Older or Frail Patients With Hematologic Cancer                                                                             | Completed | Chronic Myeloproliferative Disorders Leukemia Lymphoma Multiple Myeloma and Plasma Cell Neoplasm Myelodysplastic Syndromes                                                                     | Biological: anti-thymocyte globulin Biological: filgrastim Biological: therapeutic allogeneic lymphocytes Drug: busulfan Drug: fludarabine phosphate Drug: methotrexate Drug: tacrolimus Procedure: nonmyeloablative allogeneic hematopoietic stem cell transplantation Procedure: peripheral blood stem cell transplantation | Toxicity and survival                                                                                                                                                                                                                                                                                                                                                                                                                                                       | Not Applicable | 25  | Jan-99 | 4-Oct-12  |
| G-CSF | NCT00002489  | Combination Chemotherapy in Treating Children With Non-testicular Malignant Germ Cell Tumors                                                                       | Completed | Extragenadal Germ Cell Tumor Ovarian Cancer                                                                                                                                                    | Biological: dactinomycin Biological: filgrastim Drug: carboplatin Drug: cyclophosphamide Drug: doxorubicin hydrochloride Drug: etoposide Drug: leucovorin calcium Drug: methotrexate Drug: vincristine                                                                                                                        |                                                                                                                                                                                                                                                                                                                                                                                                                                                                             | Phase 2        |     | Oct-91 | 26-Jun-13 |
| G-CSF | NCT000085462 | Gene-Modified White Blood Cells Followed By Interleukin-2 and Vaccine Therapy in Treating Patients With Metastatic Melanoma                                        | Completed | Melanoma (Skin)                                                                                                                                                                                | Biological: aldesleukin Biological: filgrastim Biological: gp100-fowlpox vaccine Biological: therapeutic autologous lymphocytes Biological: therapeutic tumor infiltrating lymphocytes Drug: cyclophosphamide Drug: fludarabine                                                                                               |                                                                                                                                                                                                                                                                                                                                                                                                                                                                             | Phase 1        | 61  | May-04 | 22-Jun-12 |

|       |             |                                                                                                                                                       |           |                                                                                                                                                                                                                 |                                                                                                                                                                                                                                                                                                |                                                                                                                                                                                                                                                                                           |                 |    |        |                |
|-------|-------------|-------------------------------------------------------------------------------------------------------------------------------------------------------|-----------|-----------------------------------------------------------------------------------------------------------------------------------------------------------------------------------------------------------------|------------------------------------------------------------------------------------------------------------------------------------------------------------------------------------------------------------------------------------------------------------------------------------------------|-------------------------------------------------------------------------------------------------------------------------------------------------------------------------------------------------------------------------------------------------------------------------------------------|-----------------|----|--------|----------------|
| G-CSF | NCT0003398  | Bone Marrow Transplantation in Treating Patients With Hematologic Cancer                                                                              | Completed | Anemia Graft Versus Host Disease Leukemia Lymphoma Multiple Myeloma and Plasma Cell Neoplasm Myelodysplastic Syndromes                                                                                          | Biological: anti-thymocyte globulin Biological: filgrastim Drug: cyclophosphamide Drug: thiotepa Procedure: allogeneic bone marrow transplantation Procedure: bone marrow ablation with stem cell support Radiation: radiation therapy                                                         |                                                                                                                                                                                                                                                                                           | Phase 4         | 45 | Sep-98 | 17-Oct-19      |
| G-CSF | NCT0004904  | Stem Cell Transplantation in Treating Patients With Hematologic Cancer                                                                                | Completed | Chronic Myeloproliferative Disorders Graft Versus Host Disease Leukemia Lymphoma Multiple Myeloma and Plasma Cell Neoplasm Myelodysplastic Syndromes Precancerous/Nonmalignant Condition Small Intestine Cancer | Biological: anti-thymocyte globulin Biological: filgrastim Drug: cladribine Drug: cyclophosphamide Drug: etoposide Drug: methylprednisolone Drug: tacrolimus Procedure: allogeneic bone marrow transplantation Procedure: in vitro-treated peripheral blood stem cell                          |                                                                                                                                                                                                                                                                                           | Phase 1         |    | Oct-99 | 4-Jun-12       |
| G-CSF | NCT00062036 | Cyclophosphamide and Fludarabine Followed By Interleukin-2 Gene-Modified Tumor Infiltrating Lymphocytes in Treating Patients With Metastatic Melanoma | Completed | Melanoma (Skin)                                                                                                                                                                                                 | Biological: aldesleukin Biological: filgrastim Biological: incomplete Freund's adjuvant Biological: interleukin-2 gene Biological: therapeutic tumor infiltrating lymphocytes Drug: cyclophosphamide Drug: fludarabine phosphate                                                               | Survival Clinical tumor regression Toxicity profile                                                                                                                                                                                                                                       | Phase 1 Phase 2 | 33 | Jun-03 | 2-Jul-17       |
| G-CSF | NCT0004255  | Treatment of Bone Marrow to Prevent Graft-Versus-Host Disease in Patients With Acute or Chronic Leukemia Undergoing Bone Marrow Transplantation       | Completed | Graft Versus Host Disease Leukemia Myelodysplastic Syndromes                                                                                                                                                    | Biological: anti-thymocyte globulin Biological: filgrastim Drug: cyclophosphamide Drug: fludarabine phosphate Drug: methylprednisolone Drug: tacrolimus Procedure: allogeneic bone marrow transplantation Procedure: in vitro-treated bone marrow transplantation Radiation: radiation therapy |                                                                                                                                                                                                                                                                                           | Phase 2 Phase 3 |    | Mar-00 | 10-Jul-13      |
| G-CSF | NCT0002945  | High Dose Chemotherapy, Peripheral Stem Cell Transplantation, and Interleukin-2 in Treating Patients With Acute Myeloid Leukemia                      | Completed | Leukemia                                                                                                                                                                                                        | Biological: aldesleukin Biological: filgrastim Drug: cyclophosphamide Drug: cytarabine Drug: etoposide Drug: idarubicin Drug: melphalan Procedure: peripheral blood stem cell                                                                                                                  | To determine the efficacy of 4-6 h and 18-24 h, 20% ALA applications on superficial and nodular epidermally-derived lesions using ca633 nm laser irradiation.                                                                                                                             | Phase 3         | 61 | Dec-96 | April 13, 2012 |
| G-CSF | NCT00055653 | Donor Umbilical Cord Blood Transplantation in Treating Patients With Leukemia, Lymphoma, or Nonmalignant Hematologic Disorders                        | Completed | Leukemia Lymphoma Myelodysplastic Syndromes Myelodysplastic-Myeloproliferative Diseases                                                                                                                         | Biological: anti-thymocyte globulin Biological: filgrastim Drug: busulfan Drug: cyclophosphamide Drug: cyclosporine Drug: fludarabine phosphate Drug: melphalan Drug: methylprednisolone Procedure: umbilical                                                                                  |                                                                                                                                                                                                                                                                                           | Phase 2         |    | Jan-03 | 7-Mar-11       |
| G-CSF | NCT00049348 | Chemotherapy and Radiation Therapy in Treating Patients With Locally Advanced Pancreatic Cancer                                                       | Completed | Pancreatic Cancer                                                                                                                                                                                               | Biological: epoetin alfa Biological: filgrastim Drug: cisplatin Drug: fluorouracil Drug: gemcitabine hydrochloride Procedure: adjuvant therapy Procedure: conventional surgery Procedure: neoadjuvant                                                                                          | Percentage of margin-free resections produced by each program Efficacy as measured by CT scan response Post-treatment fibrosis in the resected specimens Toxicity Duration of objective response Disease-free survival Overall survival Effect of therapy and recurrence on CA19-9 values | Phase 2         |    | May-03 | 15-Nov-10      |
| G-CSF | NCT00028730 | Total-Body Irradiation and Chemotherapy Followed By Donor Bone Marrow Transplant in Treating Young Patients With Hematologic Cancer                   | Completed | Leukemia Lymphoma Myelodysplastic Syndromes Myelodysplastic/Myeloproliferative Neoplasms                                                                                                                        | Biological: anti-thymocyte globulin Biological: filgrastim Drug: cyclophosphamide Drug: fludarabine phosphate Drug: thiotepa Procedure: allogeneic bone marrow transplantation Radiation: radiation therapy                                                                                    | Minimal transplantation related mortality High disease-free survival at 2 years                                                                                                                                                                                                           | Phase 2         | 25 | Aug-01 | 22-Dec-15      |
| G-CSF | NCT00025441 | Combination Chemotherapy in Treating Children With Metastatic Rhabdomyosarcoma or Other Malignant Mesenchymal Tumors                                  | Completed | Ovarian Cancer Sarcoma Small Intestine Cancer                                                                                                                                                                   | Biological: dactinomycin Biological: filgrastim Drug: carboplatin Drug: cyclophosphamide Drug: doxorubicin hydrochloride Drug: epirubicin hydrochloride Drug: etoposide Drug: ifosfamide Drug: vincristine sulfate Procedure: peripheral blood stem                                            |                                                                                                                                                                                                                                                                                           | Phase 2         |    | Nov-98 | 4-Dec-13       |
| G-CSF | NCT00008190 | Combination Chemotherapy Followed by Peripheral Stem Cell Transplantation and Interleukin-2 in Treating Patients With Acute                           | Completed | Leukemia                                                                                                                                                                                                        | Biological: aldesleukin Biological: filgrastim Drug: busulfan Drug: cyclophosphamide Drug: etoposide Drug: melphalan Procedure: peripheral blood                                                                                                                                               |                                                                                                                                                                                                                                                                                           | Phase 2         |    | Mar-99 | 4-Feb-13       |

|       |             |                                                                                                                                                                               |           |                                                                                         |                                                                                                                                                                                                                                                                                                                                                                                                                |                                                                                                                                                                                                                                                                                                                                                                                                                                                       |                 |     |            |            |    |
|-------|-------------|-------------------------------------------------------------------------------------------------------------------------------------------------------------------------------|-----------|-----------------------------------------------------------------------------------------|----------------------------------------------------------------------------------------------------------------------------------------------------------------------------------------------------------------------------------------------------------------------------------------------------------------------------------------------------------------------------------------------------------------|-------------------------------------------------------------------------------------------------------------------------------------------------------------------------------------------------------------------------------------------------------------------------------------------------------------------------------------------------------------------------------------------------------------------------------------------------------|-----------------|-----|------------|------------|----|
| G-CSF | NCT0005802  | Chemotherapy Followed by Donor White Blood Cells Plus Interleukin-2 in Treating Patients With Acute Myeloid or Lymphocytic Leukemia                                           | Completed | Leukemia                                                                                | Biological: aldesleukin Biological: filgrastim Biological: therapeutic allogeneic lymphocytes Drug: cytarabine Drug: etoposide Drug: fludarabine phosphate Drug: methotrexate Drug: mitoxantrone hydrochloride Drug: therapeutic hydrocortisone Radiation:                                                                                                                                                     |                                                                                                                                                                                                                                                                                                                                                                                                                                                       | Phase 1 Phase 2 |     | Jun-99     | April 2010 | 2, |
| G-CSF | NCT0004231  | Combination Chemotherapy, Bone Marrow or Peripheral Stem Cell Transplantation, and/or Biological Therapy in Treating Patients With Stage III or Stage IV Mantle Cell Lymphoma | Completed | Lymphoma                                                                                | Biological: aldesleukin Biological: filgrastim Biological: recombinant interferon alfa Drug: busulfan Drug: cyclophosphamide Drug: cytarabine Drug: doxorubicin hydrochloride Drug: leucovorin calcium Drug: methotrexate Drug: prednisone Drug: teniposide Drug: vincristine sulfate Procedure: allogeneic bone marrow transplantation Procedure: autologous bone marrow                                      |                                                                                                                                                                                                                                                                                                                                                                                                                                                       | Phase 2         |     | Oct-99     | 6-Jun-12   |    |
| G-CSF | NCT0003955  | Combination Chemotherapy Plus Radiation Therapy in Treating Patients With Metastatic Rhabdomyosarcoma or Sarcoma                                                              | Completed | Sarcoma                                                                                 | Biological: dactinomycin Biological: filgrastim Biological: pegfilgrastim Biological: sargramostim Drug: cyclophosphamide Drug: irinotecan hydrochloride Drug: vincristine sulfate Radiation: radiation therapy                                                                                                                                                                                                | Event Free Survival                                                                                                                                                                                                                                                                                                                                                                                                                                   | Phase 2         | 77  | Sep-99     | 14-Feb-14  |    |
| G-CSF | NCT0003941  | Combination Chemotherapy With or Without Peripheral Stem Cell Transplant in Treating Men With Previously Untreated Germ Cell Cancer                                           | Completed | Mediastinal Cancer Metastatic Cancer Testicular Germ Cell Tumor                         | Biological: bleomycin sulfate Biological: filgrastim Drug: cisplatin Drug: etoposide Drug: ifosfamide Procedure: bone marrow ablation with stem cell support Procedure: peripheral blood stem                                                                                                                                                                                                                  | Failure-free survival as measured by Logrank at 1 year Complete response as measured by negative tumor markers and no residual masses or viable cancer cells at the end of CT scan or debulking surgery Overall survival as measured by Logrank at 2 years Quality of life as measured by Quality of Life Questionnaire-Core 30 (QLQ-C30) v3.0 at baseline, at month 6, and at year 2 Toxicity as measured by NCI-CTC v2.0 after each course, every 6 | Phase 3         | 222 | April 1999 | 24-Sep-12  |    |
| G-CSF | NCT0003913  | Umbilical Cord Blood Transplantation in Treating Patients With Hematologic Cancer or Nonmalignant Hematologic Disease                                                         | Completed | Leukemia Lymphoma Myelodysplastic Syndromes Myelodysplastic/Myeloproliferative Diseases | Biological: anti-thymocyte globulin Biological: filgrastim Drug: busulfan Drug: cyclophosphamide Drug: methylprednisolone Procedure: umbilical cord blood transplantation Radiation:                                                                                                                                                                                                                           |                                                                                                                                                                                                                                                                                                                                                                                                                                                       | Phase 2         | 390 | Dec-98     | April 2010 | 2, |
| G-CSF | NCT0002809  | Bone Marrow Transplant Plus Cyclophosphamide and Total-Body Irradiation in Treating Patients With Hematologic Cancer                                                          | Completed | Leukemia Myelodysplastic Syndromes Myelodysplastic/Myeloproliferative Diseases          | Biological: anti-thymocyte globulin Biological: filgrastim Biological: sargramostim Biological: therapeutic immune globulin Drug: cyclophosphamide Drug: methotrexate Drug: tacrolimus Procedure:                                                                                                                                                                                                              |                                                                                                                                                                                                                                                                                                                                                                                                                                                       | Phase 2         | 10  | Aug-96     | 1-Oct-10   |    |
| G-CSF | NCT0002596  | Combination Chemotherapy With or Without Bone Marrow or Stem Cell Transplantation in Treating Men With Untreated Germ Cell Tumors                                             | Completed | Childhood Germ Cell Tumor Extragenital Germ Cell Tumor Testicular Germ Cell Tumor       | Biological: bleomycin sulfate Biological: filgrastim Drug: carboplatin Drug: cisplatin Drug: cyclophosphamide Drug: etoposide Procedure: autologous bone marrow transplantation Procedure: bone marrow ablation with stem cell support Procedure: conventional surgery Procedure: peripheral blood stem                                                                                                        |                                                                                                                                                                                                                                                                                                                                                                                                                                                       | Phase 3         | 270 | Sep-94     | 26-Jun-13  |    |
| G-CSF | NCT00091104 | Cyclophosphamide and Fludarabine Followed by Vaccine Therapy, Gene-Modified White Blood Cell Infusions, and Aldesleukin in Treating Patients With Metastatic Melanoma         | Completed | Melanoma (Skin)                                                                         | Biological: MART-1:27-35 peptide vaccine Biological: aldesleukin Biological: filgrastim Biological: incomplete Freund's adjuvant Biological: therapeutic autologous lymphocytes Biological: therapeutic tumor infiltrating lymphocytes Drug: cyclophosphamide Drug: fludarabine phosphate Procedure: autologous hematopoietic stem cell transplantation Procedure: in vitro-treated peripheral blood stem cell | Safety Tumor regression In vivo survival of transplanted cells Clinical response                                                                                                                                                                                                                                                                                                                                                                      | Phase 1         | 136 | Jul-04     | 15-Mar-12  |    |

|       |             |                                                                                                                                                                                           |           |                                                                                                                                                                                                                                        |                                                                                                                                                                                                                                                                                                                |                                                                                                                                                                                                                                                                                                                                                                                                                                                                                                                                                                                              |                |      |            |                |           |
|-------|-------------|-------------------------------------------------------------------------------------------------------------------------------------------------------------------------------------------|-----------|----------------------------------------------------------------------------------------------------------------------------------------------------------------------------------------------------------------------------------------|----------------------------------------------------------------------------------------------------------------------------------------------------------------------------------------------------------------------------------------------------------------------------------------------------------------|----------------------------------------------------------------------------------------------------------------------------------------------------------------------------------------------------------------------------------------------------------------------------------------------------------------------------------------------------------------------------------------------------------------------------------------------------------------------------------------------------------------------------------------------------------------------------------------------|----------------|------|------------|----------------|-----------|
| G-CSF | NCT00014573 | Chemotherapy and Vaccine Therapy Followed by Bone Marrow or Peripheral Stem Cell Transplantation and Interleukin-2 in Treating Patients With Recurrent or Refractory Brain Cancer         | Completed | Brain and Central Nervous System Tumors                                                                                                                                                                                                | Biological: aldesleukin Biological: autologous tumor cell vaccine Biological: filgrastim Biological: sargramostim Biological: therapeutic autologous lymphocytes Drug: carmustine Drug: cisplatin Drug: cyclophosphamide Drug: paclitaxel Procedure: autologous bone marrow transplantation Procedure:         |                                                                                                                                                                                                                                                                                                                                                                                                                                                                                                                                                                                              | Phase 2        |      | Aug-98     | April 2013     | 8,        |
| G-CSF | NCT00079144 | Lymphocyte-Depleting Nonmyeloablative Preparative Chemotherapy Followed By Autologous Lymphocyte Infusion, Peptide Vaccine Plus Montanide ISA-51, and Interleukin-2 in Treating           | Completed | Melanoma (Skin)                                                                                                                                                                                                                        | Biological: NY-ESO-1 peptide vaccine Biological: aldesleukin Biological: filgrastim Biological: incomplete Freund's adjuvant Biological: therapeutic autologous lymphocytes Drug: cyclophosphamide Drug: fludarabine                                                                                           | Clinical tumor regression Survival of infused lymphocytes Long-term immune status                                                                                                                                                                                                                                                                                                                                                                                                                                                                                                            | Phase 2        |      | Jan-04     |                | 19-Jun-13 |
| G-CSF | NCT00003088 | Combination Chemotherapy in Treating Patients With Breast Cancer                                                                                                                          | Completed | Breast Cancer                                                                                                                                                                                                                          | Drug: cyclophosphamide Drug: doxorubicin hydrochloride Drug: paclitaxel                                                                                                                                                                                                                                        | Disease free survival                                                                                                                                                                                                                                                                                                                                                                                                                                                                                                                                                                        | Phase 3        | 2005 | Sep-97     |                | 6-Jul-16  |
| G-CSF | NCT01341262 | THAL-DEX Incorporated Into Double PBSC Autotransplantation for Untreated Multiple Myeloma (MM)                                                                                            | Completed | Multiple Myeloma                                                                                                                                                                                                                       | Drug: Thalidomide Drug: Dexamethasone Drug: Zoledronic acid Drug: Cyclophosphamide Drug: Melphalan                                                                                                                                                                                                             | Response rate (at least PR, VGPR, nCR and CR) to thal-dex induction duration of response (partial response, PR, very good partial response, VGPR, complete response, CR) time to progression (TTP) progression free survival (PFS) toxicity of thal-dex (induction and subsequent treatment phases) Response rate (at least PR, VGPR, nCR and CR) to first ASCT Response rate (at least PR, VGPR, nCR and CR) to second ASCT Overall survival (OS) OS by cytogenetic abnormalities OS by 18F-FDG PET/CT imaging TTP by cytogenetic abnormalities PFS by cytogenetic abnormalities TTP by 18F | Phase 2        | 378  | Mar-02     | April 25, 2011 |           |
| G-CSF | NCT00049569 | Combination Chemotherapy and Imatinib Mesylate in Treating Children With Relapsed Acute Lymphoblastic Leukemia                                                                            | Completed | L1 Childhood Acute Lymphoblastic Leukemia L2 Childhood Acute Lymphoblastic Leukemia Non-T, Non-B Childhood Acute Lymphoblastic Leukemia Recurrent Childhood Acute Lymphoblastic Leukemia T-cell Childhood Acute Lymphoblastic Leukemia | Drug: cytarabine Drug: methotrexate Drug: vincristine sulfate Drug: prednisone Drug: pegaspargase Drug: doxorubicin hydrochloride Drug: imatinib mesylate Drug: cyclophosphamide Drug: etoposide Biological: filgrastim Drug: leucovorin calcium Drug:                                                         | Feasibility assessed by excessive early deaths, induction failures, and early relapses Toxicity assessed using CTC version 2.0 Overall remission reinduction (CR2) rate EFS MRD Feasibility of combining intensive re-induction therapy with imatinib mesylate Percentage of patients who were able to complete the triple re-induction therapy with imatinib mesylate                                                                                                                                                                                                                       | Not Applicable | 126  | Jan-03     |                | 8-Oct-13  |
| G-CSF | NCT00117910 | Treatment for Elderly Patients With High Risk Breast Cancer                                                                                                                               | Completed | Breast Cancer                                                                                                                                                                                                                          | Drug: pegfilgrastim                                                                                                                                                                                                                                                                                            | Provide preliminary information on the incidence of protocol defined neutropenic events in chemotherapy cycle 1. Provide preliminary information on primary and secondary prophylaxis treatment with pegfilgrastim with respect to: Incidence of protocol defined neutropenic events over all cycles Incidence of dose reductions and dose delays of planned chemotherapy due to hematological toxicity Relative dose intensity Safety profile                                                                                                                                               | Phase 3        |      | Oct-02     |                | 16-May-08 |
| G-CSF | NCT02461121 | HLA-mismatched MST vs HLA-matched NST for AML in Intermediate-risk                                                                                                                        | Completed | Acute Myeloid Leukemia                                                                                                                                                                                                                 | Genetic: HLA mismatched stem cell Genetic: HLA matched stem cell Drug: cyclosporine A Drug: Mycophenolate mofetil Drug: Ara-C Drug: fludarabine Drug: anti-lymphocyte globulin Drug:                                                                                                                           | Overall Survival treatment-related mortality donor chimerism or microchimerism WT1+CD8+CTL GVHD disease free survival                                                                                                                                                                                                                                                                                                                                                                                                                                                                        | Phase 3        | 156  | May-04     |                | 4-Jun-15  |
| G-CSF | NCT00592111 | A Comprehensive Study of Clinically Staged Pediatric Hodgkin's Disease: Chemotherapy for All Patients; Supplementary Low Dose Involved Field Irradiation for Selected Patients (CCG 5942) | Completed | Pediatric Hodgkin's Disease                                                                                                                                                                                                            | Drug: COPP/ABV Drug: intensive chemo with concurrent growth factor                                                                                                                                                                                                                                             | Determine the role of adjuvant low dose involved field radiotherapy in pediatric patients with Hodgkin's disease who attain a complete response following initial chemotherapy                                                                                                                                                                                                                                                                                                                                                                                                               | Phase 2        | 21   | Mar-96     |                | 23-Dec-15 |
| G-CSF | NCT00042367 | Study of Systemic and Spinal Chemotherapy Followed by Radiation for Infants With Brain Tumors                                                                                             | Completed | Brain Tumors                                                                                                                                                                                                                           | Drug: Induction therapy (Regimen 1, Course 1, Cycle A1 Drug: Regimen 1, Course 1, Cycle A2 (Days 22 - 42) Drug: Cycle B Drug: Regimen 1, Course 2 Drug: Intrathecal Mafosfamide Drug: Regimen 1 Course 2, IT mafosfamide Drug: Regimen 2, Course 1 Drug: Regimen 2, Course 1, Cycle C1 Drug: Regimen 2, Course | To evaluate the feasibility, including expected disease progression, of delivering 20 weeks of systemic chemotherapy plus (IT) mafosfamide. To evaluate the safety and feasibility of a limited dose escalation schedule of IT mafosfamide in children < 3 years of age.                                                                                                                                                                                                                                                                                                                     | Not Applicable | 119  | April 2000 |                | 14-Feb-12 |
| G-CSF | NCT00083876 | D.T. PACE Versus High Dose Melphalan and Autologous Transplant in Patients With                                                                                                           | Completed | Multiple Myeloma                                                                                                                                                                                                                       | Drug: Thalidomide                                                                                                                                                                                                                                                                                              | 1.1 To evaluate, in a randomized phase III clinical trial in previously treated multiple myeloma patients whether angio-chemotherapy with D.T. PACE may be equivalent or superior to tandem transplant.                                                                                                                                                                                                                                                                                                                                                                                      | Phase 3        | 500  | Sep-98     |                | 2-Jul-10  |
| G-CSF | NCT00458250 | Feasibility of Haploidentical Hematopoietic Stem Cell Transplantation Using CAMPATH-1H                                                                                                    | Completed | Leukemia, Myeloid, Acute Leukemia, Lymphoblastic, Acute                                                                                                                                                                                | Procedure: Haploidentical hematopoietic stem cell transplantation Drug: Busulfan Drug: Cyclophosphamide Drug: CAMPATH-1H Drug: Cyclosporin A Drug:                                                                                                                                                             | Engraftment one month after transplantation six months survival                                                                                                                                                                                                                                                                                                                                                                                                                                                                                                                              | Phase 1        | 10   | Sep-06     |                | 18-Nov-08 |



|       |             |                                                                                                                               |           |                                                                                                                                                                                                                                                                                       |                                                                                                                                                                                                                                                                                                                                                                |                                                                                                                                                                                                                                                                                                                                                                                                                                                                                                                                                                                                                                                                                                                                                                                                                                                                                                                                                                                                                                              |                 |     |           |           |
|-------|-------------|-------------------------------------------------------------------------------------------------------------------------------|-----------|---------------------------------------------------------------------------------------------------------------------------------------------------------------------------------------------------------------------------------------------------------------------------------------|----------------------------------------------------------------------------------------------------------------------------------------------------------------------------------------------------------------------------------------------------------------------------------------------------------------------------------------------------------------|----------------------------------------------------------------------------------------------------------------------------------------------------------------------------------------------------------------------------------------------------------------------------------------------------------------------------------------------------------------------------------------------------------------------------------------------------------------------------------------------------------------------------------------------------------------------------------------------------------------------------------------------------------------------------------------------------------------------------------------------------------------------------------------------------------------------------------------------------------------------------------------------------------------------------------------------------------------------------------------------------------------------------------------------|-----------------|-----|-----------|-----------|
| G-CSF | NCT00558220 | R-MegaCHOP-ESHAP-BEAM in Patients With High-Risk Aggressive B-Cell Lymphomas                                                  | Completed | Diffuse Large B-Cell Lymphoma Primary Mediastinal B-Cell Lymphoma Follicular Lymphoma Grade III                                                                                                                                                                                       | Procedure: immunotherapy Procedure: Induction treatment part 1 Procedure: Induction treatment part 2 with PBPC collection Procedure: Induction treatment part 3 Procedure: Consolidation treatment part 1: HD-chemotherapy with ASCT Radiation: Consolidation treatment                                                                                        | Progression-free survival Complete remission and overall response rate Overall survival                                                                                                                                                                                                                                                                                                                                                                                                                                                                                                                                                                                                                                                                                                                                                                                                                                                                                                                                                      | Phase 2         | 106 | May-02    | 14-Nov-07 |
| G-CSF | NCT01501487 | MINT I Multi- Institutional Neo-adjunct Therapy MammaPrint Project I                                                          | Completed | Breast Cancer                                                                                                                                                                                                                                                                         | Drug: TAC chemotherapy Drug: TC chemotherapy Drug: Dose Dense AC or FEC100 followed by paclitaxel or docetaxel chemotherapy Drug: TCH chemotherapy Drug: T + trastuzumab followed by CEF + trastuzumab Drug: Dose dense AC followed by T + trastuzumab Drug: Dose dense AC followed by T + trastuzumab + pertuzumab Drug: PTH followed by dose dense AC of FEC | Determine the predictive power of chemosensitivity of MammaPrint as measured by pCR. Determine the predictive power of chemosensitivity of the combination of MammaPrint and Blueprint as measured by pCR. Compare TargetPrint single gene read out of ER, PR and HER2 with local and centralized IHC and/or CISH/FISH assessment of ER, PR and HER2. Identify possible correlations between the TheraPrint Research Gene Panel outcomes and chemoresponsiveness. Identify and/or validate predictive gene expression profiles of clinical response/resistance to chemotherapy. Compare the three Blueprint molecular subtype categories with IHC-based subtype classification.                                                                                                                                                                                                                                                                                                                                                              | Phase 4         | 226 | Oct-11    | 28-Jun-18 |
| G-CSF | NCT04009941 | Efficacy and Safety of 4.5mg PEG-rhG-CSF Per Cycle in Preventing Neutropenia After Intensive Chemotherapy for Breast Cancer   | Completed | Breast Cancer Neutropenia                                                                                                                                                                                                                                                             | Drug: PEG-rhG-CSF                                                                                                                                                                                                                                                                                                                                              | RDI for each EC chemotherapy Chemotherapeutic dose adjustment due to neutropenia overall completion rate of chemotherapy Incidence of febrile neutropenia Incidence of Grade 3/4 ACN reduction Duration of Grade 3/4 ACN reduction                                                                                                                                                                                                                                                                                                                                                                                                                                                                                                                                                                                                                                                                                                                                                                                                           | Phase 4         | 104 | 1-Aug-19  | 28-Oct-20 |
| G-CSF | NCT02921061 | Decitabine With GCLAM for Adults With Newly Diagnosed, Relapsed, or Refractory AML or High-Risk MDS                           | Completed | Mixed Phenotype Acute Leukemia Previously Treated Myelodysplastic Syndrome Recurrent Adult Acute Myeloid Leukemia Recurrent High Risk Myelodysplastic Syndrome Refractory Acute Myeloid Leukemia Refractory High Risk Myelodysplastic Syndrome Untreated Adult Acute Myeloid Leukemia | Drug: Cladribine Drug: Cytarabine Drug: Decitabine Biological: Filgrastim Other: Laboratory Biomarker Analysis Drug: Mitoxantrone Hydrochloride                                                                                                                                                                                                                | Number of Participants Experiencing Dose Limiting Toxicities (DLTs) at the Maximum Tolerated Dose (MTD) for Decitabine When Given Together With G-CLAM Toxicities (DLTs) (Phase I) Number of Participants With Minimal Residual Disease Negative (MRDneg) Complete Remission (Phase II) Number of Participants Who Achieved Remission (Complete Remission [CR]/CR With Incomplete Peripheral Blood Count Recovery [CRI]) Number of Participants With Overall Survival Number of Participants With Numbers of Circulating CD34+ Cells on the First Day of Apheresis Number of Apheresis Sessions Required to Collect $\geq 4 \times 10^6$ CD34+ Cells/kg for Multiple Myeloma Patients and $\geq 2 \times 10^6$ CD34+ Cells/kg for Lymphoma Patients Time to Neutrophil Engraftment After AHST Time to Platelet Engraftment After AHST Number of Patients With Grade 3+ Treatment Related Adverse Events Number of Participants That Received Red Blood Cell and Platelet Transfusions Prior to Engraftment Number of Patients That Failed to | Phase 1 Phase 2 | 28  | 17-Nov-16 | 17-Mar-20 |
| G-CSF | NCT02003625 | Meloxicam vs Placebo for Mobilization                                                                                         | Completed | Non-Hodgkin's Lymphoma Hodgkin's Lymphoma Multiple Myeloma Hematopoietic Stem Cells                                                                                                                                                                                                   | Drug: G-CSF Drug: meloxicam Drug: Placebo                                                                                                                                                                                                                                                                                                                      | Comparison of Percentage of Patients Achieving a Complete Response Percentage of patients with extended disease-free survival Comparison of Overall Survival Transplant related mortality Incidence of relapse Incidence of disease progression Hematologic recovery Time to Progression Time to relapse Time to attainment of CR and CR+PR Duration of maintenance treatment Dropout rate from maintenance                                                                                                                                                                                                                                                                                                                                                                                                                                                                                                                                                                                                                                  | Phase 2         | 31  | Oct-13    | 18-May-20 |
| G-CSF | NCT02400281 | Study of Crenolanib Combined With Chemotherapy in FLT3-mutated Acute Myeloid Leukemia Patients                                | Completed | Acute Myeloid Leukemia                                                                                                                                                                                                                                                                | Drug: Crenolanib besylate Drug: Idarubicin Drug: Cytarabine Drug: Azacytidine Drug: Mitoxantrone Drug: Etoposide Drug: Fludarabine Drug: G-CSF                                                                                                                                                                                                                 | Dose-limiting toxicities of crenolanib besylate combination therapy Response rate of crenolanib besylate combination therapy Duration of response Progression free survival Overall survival                                                                                                                                                                                                                                                                                                                                                                                                                                                                                                                                                                                                                                                                                                                                                                                                                                                 | Phase 1 Phase 2 | 28  | Sep-15    | 20-Jul-20 |
| G-CSF | NCT00177047 | Autologous Transplant for Multiple Myeloma                                                                                    | Completed | Multiple Myeloma                                                                                                                                                                                                                                                                      | Procedure: Stem Cell Transplant Drug: Cyclophosphamide + Mesna Drug: Melphalan Biological: Granulocyte-colony stimulating factor                                                                                                                                                                                                                               | Comparison of Percentage of Patients Achieving a Complete Response Percentage of patients with extended disease-free survival Comparison of Overall Survival Transplant related mortality Incidence of relapse Incidence of disease progression Hematologic recovery Time to Progression Time to relapse Time to attainment of CR and CR+PR Duration of maintenance treatment Dropout rate from maintenance                                                                                                                                                                                                                                                                                                                                                                                                                                                                                                                                                                                                                                  | Phase 2 Phase 3 | 363 | 20-Apr-04 | 3-Dec-20  |
| G-CSF | NCT03661515 | Selinexor (KPT-330) Plus FLAG-Ida for the Treatment of Relapsing/Refractory AML                                               | Completed | Acute Myeloid Leukemia                                                                                                                                                                                                                                                                | Drug: Selinexor Drug: fludarabine Drug: idarubicin Drug: cytarabine Drug: G-CSF                                                                                                                                                                                                                                                                                | Maximum tolerated dose (MTD) of selinexor in combination with FLAG-Ida regimen Find recommended phase 2 dose Assessment of toxicity: Number of participants with treatment-related adverse events as assessed by CTCAE v4.0 CR and CRI                                                                                                                                                                                                                                                                                                                                                                                                                                                                                                                                                                                                                                                                                                                                                                                                       | Phase 1         | 16  | 17-Jul-18 | 20-May-20 |
| G-CSF | NCT02416908 | Study of CLAG + Selinexor in Relapsed or Refractory Acute Myeloid Leukemia                                                    | Completed | Acute Myeloid Leukemia                                                                                                                                                                                                                                                                | Drug: Selinexor Drug: Cladribine Drug: G-CSF Drug: Cytarabine Procedure: Bone marrow biopsy                                                                                                                                                                                                                                                                    | Safety and Tolerability of Treatment as Measured by Incidence of Grade 3-4 Adverse Events Occurring in >5% of Participants Complete Remission Rate (CR + CRI) Time to Platelet Engraftment Time to Neutrophil Engraftment Event-free Survival Duration of Remission Relapse-free Survival Overall Survival Number of Participants Who Were Able                                                                                                                                                                                                                                                                                                                                                                                                                                                                                                                                                                                                                                                                                              | Phase 1 Phase 2 | 40  | 16-Jun-15 | 13-Mar-20 |
| G-CSF | NCT02319135 | Azacytidine (Vidaza®) Versus Fludarabine and Cytarabine (Fluga Scheme) in Elderly Patients With Newly Diagnosed Acute Myeloid | Completed | Acute Myeloid Leukemia                                                                                                                                                                                                                                                                | Drug: Azacitidine Drug: Fludarabine Drug: Cytarabine Drug: Lenograstim Drug: Filgrastim                                                                                                                                                                                                                                                                        | Efficacy (overall survival (OS) attained without increasing the therapy-related toxicity or decreasing the patients QoL) Efficacy (Event free survival (EFS)) Efficacy (Duration of remission.) Efficacy (Overall survival) Efficacy Safety (Compare hematologic and non-hematologic toxicity)                                                                                                                                                                                                                                                                                                                                                                                                                                                                                                                                                                                                                                                                                                                                               | Phase 3         | 289 | Oct-14    | 6-Apr-20  |
| G-CSF | NCT00211185 | A Study of ONTAK and CHOP in Newly Diagnosed, Peripheral T-Cell Lymphoma                                                      | Completed | Lymphoma, T-Cell, Peripheral                                                                                                                                                                                                                                                          | Drug: Denileukin diftitox Drug: Cyclophosphamide Drug: Doxorubicin Drug: Vincristine Drug: Prednisone Other: Pegfilgrastim                                                                                                                                                                                                                                     | Summary of All Adverse Events by Frequency in Greater Than 20% of Treated Participants Summary of All Treatment-Related Adverse Events by Frequency in Greater Than 10% of Treated Participants Summary of Treatment-Related Adverse Events Greater Than or Equal to Grade 3 by System Organ Class Summary of Study Drug-Related (Possible, Probable, or Definite) Serious Adverse Events Overall Response in the Intent To Treat (ITT) Population Overall Response in the Efficacy Analyzable (EA) Population Duration of Response Progression-Free Survival Percentage of Participants                                                                                                                                                                                                                                                                                                                                                                                                                                                     | Phase 2         | 49  | 14-Mar-04 | 18-Mar-20 |
| G-CSF | NCT00075621 | Tandem Autologous Stem Cell Transplantation in Treating Patients With Primary Systemic (AL)                                   | Completed | Multiple Myeloma                                                                                                                                                                                                                                                                      | Drug: melphalan Procedure: autologous peripheral blood stem cell transplantation                                                                                                                                                                                                                                                                               | safety Efficacy                                                                                                                                                                                                                                                                                                                                                                                                                                                                                                                                                                                                                                                                                                                                                                                                                                                                                                                                                                                                                              | Phase 2         | 62  | Aug-00    | 17-Sep-20 |

|       |             |                                                                                                                                                                                                                        |           |                                                               |                                                                                                                                                                                                                                                                                                                                                                                                                                                                                                                                                                                                                                                                                                                                                                                                                   |                                                                                                                                                                                                                                                                                                                                                                                                                                                                                                                                                                                                                                                                                                                                                                                                                      |                 |     |           |           |
|-------|-------------|------------------------------------------------------------------------------------------------------------------------------------------------------------------------------------------------------------------------|-----------|---------------------------------------------------------------|-------------------------------------------------------------------------------------------------------------------------------------------------------------------------------------------------------------------------------------------------------------------------------------------------------------------------------------------------------------------------------------------------------------------------------------------------------------------------------------------------------------------------------------------------------------------------------------------------------------------------------------------------------------------------------------------------------------------------------------------------------------------------------------------------------------------|----------------------------------------------------------------------------------------------------------------------------------------------------------------------------------------------------------------------------------------------------------------------------------------------------------------------------------------------------------------------------------------------------------------------------------------------------------------------------------------------------------------------------------------------------------------------------------------------------------------------------------------------------------------------------------------------------------------------------------------------------------------------------------------------------------------------|-----------------|-----|-----------|-----------|
| G-CSF | NCT01180322 | Trial Evaluating Induction Therapy With Idarubicin and Etoposide Plus Sequential or Concurrent Azacitidine and Maintenance Therapy With Azacitidine                                                                    | Completed | Acute Myeloid Leukemia (AML)                                  | Drug: Cytarabine Drug: Idarubicin Drug: Etoposide Drug: Azacitidine Drug: Lenograstim                                                                                                                                                                                                                                                                                                                                                                                                                                                                                                                                                                                                                                                                                                                             | Rates of complete remission (CR) after induction therapy Event-free survival Relapse-free survival overall survival days in hospital during each cycle and during the whole intervention Rate of early deaths or hypoplastic deaths (ED/HD) type, frequency, severity (graded using the National Cancer Institute Common Terminology Criteria for Adverse Events [NCI CTCAE] Version 3.0), timing and relatedness of non-hematological toxicity observed during different treatment cycles quality of life assessed by the EORTC Quality of Life Core Questionnaire (QLQ-C30) duration of leukopenia after each consolidation cycle duration of neutropenia after each consolidation cycle duration of thrombocytopenia after each consolidation cycle duration of leukopenia after each induction cycle duration of | Phase 2         | 277 | Nov-10    | 31-Dec-20 |
| G-CSF | NCT01540812 | Treatment of Acute Lymphoblastic Leukemia HIGH RISK BCR / ABL NEGATIVE IN ADULTS                                                                                                                                       | Completed | Acute Lymphoblastic Leukemia                                  | Drug: Vincristine in induction Drug: Daunorubicin in induction Drug: Prednisone in induction Drug: Metotrexato in induction Drug: Cytarabine in induction Drug: Hydrocortisone in induction Drug: Idarubicin in induction-2 Drug: Fludarabine in induction-2 Drug: Ara-C in induction-2 Drug: G-CSF in induction-2 Drug: Dexamethasone in consolidation-1 Drug: Vincristine in consolidation-1 Drug: Metotrexato in consolidation-1 Drug: PEG-ASP in consolidation-1 Drug: Dexamethasone in consolidation-2 Drug: Ara-C in consolidation-2 Drug: PEG-ASP in consolidation-2 Drug: Dexamethasone in consolidation-3 Drug: Vincristine in consolidation-3 Drug: Metotrexato in consolidation-3 Drug: PEG-ASP in consolidation-3 Procedure: allogeneic HSCT Procedure: Allo HSCT with reduced-intensity conditioning | Overall response rate Evaluate CR rate with addition of PEG-ASP in the induction phase Standardization of minimal residual disease To assess the toxic mortality Assess the proportion of non-responders or slow responders Overall survival                                                                                                                                                                                                                                                                                                                                                                                                                                                                                                                                                                         |                 | 418 | Feb-12    | 9-Mar-20  |
| G-CSF | NCT02392793 | Talazoparib Plus Irinotecan With or Without Temozolomide in Children With Refractory or Recurrent Solid Malignancies                                                                                                   | Completed | Childhood Solid Tumors                                        | Drug: Talazoparib Drug: Irinotecan Drug: Temozolomide Drug: Filgrastim Drug: Pegfilgrastim                                                                                                                                                                                                                                                                                                                                                                                                                                                                                                                                                                                                                                                                                                                        | Maximum tolerated dose (MTD) of talazoparib combined with irinotecan Dose-limiting toxicities (DLT) of talazoparib combined with irinotecan Maximum tolerated dose (MTD) of temozolomide combined with talazoparib Dose-limited toxicities (DLT) of combination therapy with temozolomide, talazoparib and irinotecan Response rate Irinotecan Cmax Talazoparib Cmax Irinotecan AUC Talazoparib AUC Irinotecan Clearance Talazoparib Clearance Irinotecan Tmax Talazoparib Tmax Irinotecan t1/2 Talazoparib t1/2                                                                                                                                                                                                                                                                                                     | Phase 1         | 60  | 25-Mar-15 | 17-Apr-20 |
| G-CSF | NCT01840579 | Study of Pembrolizumab (MK-3475) Monotherapy in Advanced Solid Tumors and Pembrolizumab Combination Therapy in Advanced Non-small Cell Lung Cancer/ Extensive-disease Small Cell Lung Cancer (MK-3475-011/KEYNOTE-011) | Completed | Solid Tumor Non-small Cell Lung Cancer Small Cell Lung Cancer | Biological: Pembrolizumab 2 mg/kg Biological: Pembrolizumab 10 mg/kg Biological: Pembrolizumab 200 mg/kg Drug: Cisplatin 75 mg/m^2 Drug: Pemetrexed 500 mg/m^2 Drug: Carboplatin AUC 5 mg/mL/min Drug: Carboplatin AUC 6 mg/mL/min Drug: Paclitaxel 200 mg/m^2 Drug: Nab-paclitaxel 100 mg/m^2 Biological: Ipilimumab 1 mg/kg Drug: Etoposide 100 mg/m^2 Drug: Rituximab Drug: Imatinib Drug: Cyclophosphamide Drug: Doxorubicin Drug: Mesna Drug: VSLI Drug: Solu-Medrol Drug: Methotrexate Drug: Ara-C Drug: G-CSF Drug: Pegfilgrastim Drug:                                                                                                                                                                                                                                                                    | Number of participants experiencing dose-limiting toxicities (DLTs) Number of Participants Who Experience at Least One Adverse Event (AE) Number of Participants Who Discontinue Study Treatment Due to an Adverse Event (AE)                                                                                                                                                                                                                                                                                                                                                                                                                                                                                                                                                                                        | Phase 1         | 57  | 26-Apr-13 | 29-Apr-20 |
| G-CSF | NCT01319981 | Hyper-CVAD With Liposomal Vincristine in Acute Lymphoblastic Leukemia                                                                                                                                                  | Completed | Leukemia                                                      | Drug: Rituximab Drug: Imatinib Drug: Cyclophosphamide Drug: Doxorubicin Drug: Mesna Drug: VSLI Drug: Solu-Medrol Drug: Methotrexate Drug: Ara-C Drug: G-CSF Drug: Pegfilgrastim Drug:                                                                                                                                                                                                                                                                                                                                                                                                                                                                                                                                                                                                                             | Number of Patients With Complete Remission at One Year                                                                                                                                                                                                                                                                                                                                                                                                                                                                                                                                                                                                                                                                                                                                                               | Phase 2         | 33  | 5-Mar-13  | 16-Nov-20 |
| G-CSF | NCT02423915 | Fucosylated T Cells for Graft Versus Host Disease (GVHD) Prevention                                                                                                                                                    | Completed | Leukemia Lymphoma                                             | Drug: Rituximab Drug: Fludarabine Drug: Cyclophosphamide Radiation: Total Body Radiation Procedure: Fucosylated Regulatory T Cells Procedure: Cord Blood Infusions Drug: Mycophenolate mofetil Drug: Sirolimus Procedure: Bone Marrow Aspiration Drug: G-CSF Procedure: Non-Fucosylated Regulatory T Cells                                                                                                                                                                                                                                                                                                                                                                                                                                                                                                        | Severe Infusional Toxicity Safety of Administering Fucosylated Umbilical Cord Blood (CB) Regulatory T cells (Tregs) in a CBT, MRD, or MUD Transplant Time to Severe Graft Versus Host Disease (GVHD) or Death                                                                                                                                                                                                                                                                                                                                                                                                                                                                                                                                                                                                        | Phase 1 Phase 2 | 5   | 30-Jul-15 | 19-Nov-20 |

|        |             |                                                                                                                                   |           |                                                                                                                                                                                                                                                                                                                                 |                                                                                                                                                                                                                                                                                                                                                                                                                                                                                                                                                                                                                                                                |                                                                                                                                                                                                                                                                                                                                                                                                                                                                                                                                                                                                                                                                                                                                                                                                                                                                                                                                                                                                                                                                                                                                                                                                                                                                                                                                                                                                                                                                                                        |         |     |           |           |
|--------|-------------|-----------------------------------------------------------------------------------------------------------------------------------|-----------|---------------------------------------------------------------------------------------------------------------------------------------------------------------------------------------------------------------------------------------------------------------------------------------------------------------------------------|----------------------------------------------------------------------------------------------------------------------------------------------------------------------------------------------------------------------------------------------------------------------------------------------------------------------------------------------------------------------------------------------------------------------------------------------------------------------------------------------------------------------------------------------------------------------------------------------------------------------------------------------------------------|--------------------------------------------------------------------------------------------------------------------------------------------------------------------------------------------------------------------------------------------------------------------------------------------------------------------------------------------------------------------------------------------------------------------------------------------------------------------------------------------------------------------------------------------------------------------------------------------------------------------------------------------------------------------------------------------------------------------------------------------------------------------------------------------------------------------------------------------------------------------------------------------------------------------------------------------------------------------------------------------------------------------------------------------------------------------------------------------------------------------------------------------------------------------------------------------------------------------------------------------------------------------------------------------------------------------------------------------------------------------------------------------------------------------------------------------------------------------------------------------------------|---------|-----|-----------|-----------|
| G-CSF  | NCT02756572 | Early Allogeneic Hematopoietic Cell Transplantation in Treating Patients With Relapsed or Refractory High-Grade Myeloid Neoplasms | Completed | Blasts 10 Percent or More of Bone Marrow Nucleated Cells Chronic Myelomonocytic Leukemia-2 High Grade Malignant Neoplasm Myelodysplastic Syndrome Myelodysplastic Syndrome With Excess Blasts-2 Myeloid Neoplasm Previously Treated Myelodysplastic Syndrome Recurrent Acute Myeloid Leukemia Refractory Acute Myeloid Leukemia | Drug: Cladribine Drug: Cyclosporine Drug: Cytarabine Biological: Filgrastim Drug: Fludarabine Phosphate Procedure: Allogeneic Hematopoietic Stem Cell Transplantation Other: Laboratory Biomarker Analysis Drug: Melphalan Drug: Mitoxantrone Hydrochloride Drug: Mycophenolate Mofetil Other: Questionnaire Administration Drug: Sirolimus Radiation: Total-Body Irradiation Drug: Melphalan Hydrochloride                                                                                                                                                                                                                                                    | Feasibility of early allogeneic hematopoietic cell transplant assessed by enrollment and incidence of early transplant Event free survival Factors that distinguish patients who receive early hematopoietic cell transplant Hematopoietic cell transplant incidence of complete remission, defined as < 5% blasts on bone marrow biopsy with hematologic recovery, defined as absolute neutrophil count > 1000/ul and platelets > 100,000/m Incidence of acute graft versus host disease (graft versus host disease graded II, III, or IV) Incidence of complete remission by platelets, defined as platelets < 100,000/ul Incidence of complete remission with insufficient hematologic recovery, defined as absolute neutrophil count < 1000/ul or platelets < 100,000/ul Incidence of relapse, defined as > 5% blasts in bone marrow, flow cytometry, or manual differential OR treatment for active relapsed disease Incidence of treatment related mortality Overall survival Patient-reported outcomes assessed by European quality of life five dimension Patient-reported outcomes assessed by functional assessment cancer therapy-leukemia, and functional assessment cancer therapy-bone marrow transplant subscale Patient-reported outcomes assessed by MD Anderson Symptom Inventory Relapse free survival                                                                                                                                                                              | Phase 2 | 30  | 22-Sep-16 | 8-Jul-20  |
| G-CSF  | NCT02793544 | HLA-Mismatched Unrelated Donor Bone Marrow Transplantation With Post-Transplantation Cyclophosphamide                             | Completed | Myelodysplastic Syndrome (MDS) Chronic Lymphocytic Leukemia (CLL) Chemotherapy-sensitive Lymphoma Acute Lymphoblastic Leukemia (ALL) T Lymphoblastic Lymphoma Acute Myelogenous Leukemia (AML) Acute Biphenotypic Leukemia (ABL) Acute Undifferentiated Leukemia (AUL)                                                          | Drug: Fludarabine Drug: Cyclophosphamide 14.5 mg/kg/day IV on Days -6, -5 Radiation: Total Body Irradiation (TBI) 200cGy on Day -1 Procedure: Infusion of non-T-cell depleted bone marrow on Day 0 Drug: Busulfan Drug: Cyclophosphamide 50mg/kg/day IV on Days -2,-1 Drug: Cyclophosphamide 50mg/kg/day IV on Days -5,-4 Radiation: Total Body Irradiation (TBI) 200cGy twice a day on Days -3, -2, -1 Drug: Post-HCT Cyclophosphamide 50mg/kg IV on Day+3, +4 Drug: Sirolimus Drug: Mycophenolate mofetil Drug: G-CSF Drug: Pre-HCT Mesna on Days -6 and -5 Drug: Pre-HCT Mesna on Days -2 and -1 Drug: Pre-HCT Mesna on Days -5 and -4 Drug: Post-HCT Mesna | Overall Survival Progression-free survival Transplant-related mortality Cumulative incidence of neutrophil recovery Cumulative incidence of platelet recovery Cumulative incidence of primary graft failure Donor Chimerism Peripheral blood chimerism Cumulative incidence of acute GVHD Cumulative incidence of chronic GVHD Cumulative incidences of viral reactivations and infections Cumulative incidence of relapse/progression Cumulative incidences of thrombotic microangiopathy (TMA) and hepatic veno-occlusive disease (VOD) sinusoidal obstruction syndrome (SOS) Proportion of subjects proceeding to transplant Donor Selection Characteristics Time from search to donor identification Subgroup analysis of HIV-positive subjects Donor clonal hematopoiesis                                                                                                                                                                                                                                                                                                                                                                                                                                                                                                                                                                                                                                                                                                                         | Phase 2 | 80  | Dec-16    | 2-Dec-20  |
| G-CSF  | NCT02124148 | A Study of Prexasertib (LY2606368) With Chemotherapy or Targeted Agents in Participants With Advanced Cancer                      | Completed | Neoplasm Metastasis Colorectal Neoplasms Breast Cancer                                                                                                                                                                                                                                                                          | Drug: Prexasertib Drug: Cisplatin Drug: Cetuximab Drug: G-CSF Drug: Pemetrexed Drug: Fluorouracil Drug: LY3023414 Drug: Leucovorin                                                                                                                                                                                                                                                                                                                                                                                                                                                                                                                             | Part A: Maximum Tolerated Dose and Schedule of Prexasertib in Combination with Cisplatin Part B: Maximum Tolerated Dose of Prexasertib in Combination with Cetuximab Part C: Maximum Tolerated Dose of Prexasertib in Combination with Pemetrexed Part D: Maximum Tolerated Dose of Prexasertib in Combination with Fluorouracil (5-FU) Part E: Maximum Tolerated Dose of Prexasertib in Combination with LY3023414 Pharmacokinetics: Maximum Plasma Concentration of Prexasertib Pharmacokinetics: Area Under the Plasma Concentration Curve of Prexasertib Pharmacokinetics: Maximum Plasma Concentration of Cisplatin (Total Platinum) Pharmacokinetics: Area Under the Plasma Concentration Curve of Cisplatin (Total Platinum) Pharmacokinetics: Maximum Plasma Concentration of Cetuximab Pharmacokinetics: Maximum Plasma Concentration of Pemetrexed Pharmacokinetics: Area Under the Plasma Concentration Curve of Pemetrexed Pharmacokinetics: Maximum Plasma Concentration of 5-FU Pharmacokinetics: Maximum Plasma Concentration of LY3023414 Pharmacokinetics: Area Under the Plasma Concentration Curve of LY3023414 B2_F2_F3 Dose Expansion: Maximum tolerated dose (MTD) of brentuximab vedotin and bendamustine (phase 1) Dose limiting toxicities (DLT) of brentuximab vedotin and bendamustine (phase 1) Overall Response Rate for the combination of brentuximab vedotin and bendamustine (phase 2) Duration of Response (DoR) (phase 1) Progression free survival (PFS) (phase 2) | Phase 1 | 167 | 18-Jun-14 | 1-Apr-20  |
| G-CSF  | NCT01657331 | Brentuximab Vedotin and Bendamustine for the Treatment of Hodgkin Lymphoma and Anaplastic Large Cell Lymphoma (ALCL)              | Completed | Hodgkin Lymphoma Anaplastic Large Cell Lymphoma                                                                                                                                                                                                                                                                                 | Drug: Brentuximab Vedotin Drug: Bendamustine Drug: Neulasta                                                                                                                                                                                                                                                                                                                                                                                                                                                                                                                                                                                                    | Maximum tolerated dose (MTD) of brentuximab vedotin and bendamustine (phase 1) Dose limiting toxicities (DLT) of brentuximab vedotin and bendamustine (phase 1) Overall Response Rate for the combination of brentuximab vedotin and bendamustine (phase 2) Duration of Response (DoR) (phase 1) Progression free survival (PFS) (phase 2)                                                                                                                                                                                                                                                                                                                                                                                                                                                                                                                                                                                                                                                                                                                                                                                                                                                                                                                                                                                                                                                                                                                                                             | Phase 1 | 71  | Jul-12    | 17-Jul-20 |
| GM-CSF | NCT00157573 | GM-CSF, Sargramostim in Women With Recurrent Ovarian Cancer                                                                       | Completed | Ovarian Cancer Fallopian Tube Cancer                                                                                                                                                                                                                                                                                            | Drug: GM-CSF, sargramostim                                                                                                                                                                                                                                                                                                                                                                                                                                                                                                                                                                                                                                     | Median Time to Treatment Termination (TTT) Median Time to Progression (TTP) Tumor Response Rate (RR) Number of Participants With Adverse Events (Toxicity) Grade 3 or 4                                                                                                                                                                                                                                                                                                                                                                                                                                                                                                                                                                                                                                                                                                                                                                                                                                                                                                                                                                                                                                                                                                                                                                                                                                                                                                                                | Phase 2 | 72  | Dec-04    | 8-May-17  |
| GM-CSF | NCT00274287 | GM-CSF for Maintenance of Prostate Cancer for Patients Responding to Taxotere                                                     | Completed | Prostate Cancer                                                                                                                                                                                                                                                                                                                 | Drug: GM CSF                                                                                                                                                                                                                                                                                                                                                                                                                                                                                                                                                                                                                                                   | Time to Disease Progression (TTP) Response Rate (PSA) Response Rate (Radiographic) Median Overall Survival (OS) Median Number of GM-CSF Cycles                                                                                                                                                                                                                                                                                                                                                                                                                                                                                                                                                                                                                                                                                                                                                                                                                                                                                                                                                                                                                                                                                                                                                                                                                                                                                                                                                         | Phase 2 | 15  | Jan-06    | 28-Mar-19 |
| GM-CSF | NCT00000626 | Phase II Study of Filgrastim (G-CSF) Plus ABVD in the Treatment of HIV-Associated Hodgkin's Disease                               | Completed | HIV Infections Hodgkin's Disease                                                                                                                                                                                                                                                                                                | Drug: Vinblastine sulfate Drug: Dacarbazine Drug: Filgrastim Drug: Bleomycin sulfate Drug: Doxorubicin                                                                                                                                                                                                                                                                                                                                                                                                                                                                                                                                                         |                                                                                                                                                                                                                                                                                                                                                                                                                                                                                                                                                                                                                                                                                                                                                                                                                                                                                                                                                                                                                                                                                                                                                                                                                                                                                                                                                                                                                                                                                                        | Phase 2 | 27  |           | 23-May-12 |

|        |             |                                                                                                                                                                                                                                       |           |                                                                                |                                                                                                                                                                                               |         |     |          |            |     |
|--------|-------------|---------------------------------------------------------------------------------------------------------------------------------------------------------------------------------------------------------------------------------------|-----------|--------------------------------------------------------------------------------|-----------------------------------------------------------------------------------------------------------------------------------------------------------------------------------------------|---------|-----|----------|------------|-----|
| GM-CSF | NCT00000658 | A Phase III Randomized Trial of Low-Dose Versus Standard-Dose mBACOD Chemotherapy With rGM-CSF for Treatment of AIDS-Associated Non-Hodgkin's Lymphoma                                                                                | Completed | Lymphoma, Non-Hodgkin HIV Infections                                           | Drug: Bleomycin sulfate Drug: Vincristine sulfate Drug: Doxorubicin hydrochloride Drug: Cyclophosphamide Drug: Allopurinol Drug: Methotrexate Drug: Cytarabine Drug: Leucovorin calcium Drug: | Phase 3 | 250 |          | April 2012 | 30, |
| GM-CSF | NCT00000681 | A Phase I Study of the Combination of Recombinant GM-CSF, AZT, and Chemotherapy (ABV) (Adriamycin, Bleomycin, Vincristine) in AIDS and Kaposi's Sarcoma                                                                               | Completed | Sarcoma, Kaposi HIV Infections                                                 | Drug: Bleomycin sulfate Drug: Vincristine sulfate Drug: Doxorubicin hydrochloride Drug: Zidovudine Drug: Sargramostim                                                                         | Phase 1 | 24  |          | April 2012 | 30, |
| GM-CSF | NCT00000689 | Phase I Trial of mBACOD and Granulocyte-Macrophage Colony-Stimulating Factor (GM-CSF) in AIDS-Associated Large Cell, Immunoblastic, and Small Non-                                                                                    | Completed | Lymphoma, Non-Hodgkin HIV Infections                                           | Drug: Bleomycin sulfate Drug: Vincristine sulfate Drug: Doxorubicin hydrochloride Drug: Cyclophosphamide Drug: Methotrexate Drug: Cytarabine Drug:                                            | Phase 1 | 18  |          | April 2012 | 30, |
| GM-CSF | NCT00000694 | A Phase I Trial of Recombinant Human Granulocyte-Macrophage Colony Stimulating Factor (rHuGM-CSF), Recombinant Alpha Interferon and Azidothymidine (AZT) in AIDS-Associated Kaposi's Sarcoma                                          | Completed | Sarcoma, Kaposi HIV Infections                                                 | Drug: Interferon alfa-2b Drug: Zidovudine Drug: Sargramostim                                                                                                                                  | Phase 1 | 18  |          | 23-May-12  |     |
| GM-CSF | NCT00000801 | Phase II Trial of Sequential Chemotherapy and Radiotherapy for AIDS-Related Primary Central Nervous System Lymphoma                                                                                                                   | Completed | Lymphoma, Non-Hodgkin HIV Infections                                           | Drug: Filgrastim Drug: Vincristine sulfate Drug: Doxorubicin hydrochloride Drug: Cyclophosphamide Drug: Cytarabine Drug:                                                                      | Phase 2 | 33  |          | 1-Nov-12   |     |
| GM-CSF | NCT00001059 | Comparison of Liposomal Doxorubicin Used Alone or in Combination With Bleomycin Plus Vincristine in the Treatment of Kaposi's Sarcoma in Patients With                                                                                | Completed | Sarcoma, Kaposi HIV Infections                                                 | Drug: Doxorubicin hydrochloride (liposomal) Drug: Filgrastim Drug: Bleomycin sulfate Drug: Vincristine sulfate                                                                                | Phase 2 | 120 |          | April 2012 | 17, |
| GM-CSF | NCT00001237 | Pilot Protocol for the Treatment of Patients With Small Non-Cleaved and Diffuse Large Cell Lymphomas                                                                                                                                  | Completed | Burkitt Lymphoma Lymphoma, Large-Cell, Diffuse Lymphoma, Small Noncleaved-Cell | Drug: granulocyte-macrophage colony stimulating factor (GM-CSF)                                                                                                                               | Phase 2 | 120 | Mar-89   | 4-Mar-08   |     |
| GM-CSF | NCT00001239 | Combination Chemotherapy (FLAC) Combined With Granulocyte-Macrophage Colony Stimulating Factor in Locally Advanced and                                                                                                                | Completed | Breast Cancer Breast Neoplasms                                                 | Drug: FLAC with GM-CSF                                                                                                                                                                        | Phase 2 | 100 | Jul-89   | 4-Mar-08   |     |
| GM-CSF | NCT00001269 | Phase I Trial of FLAC (5-Fluorouracil, Leucovorin, Adriamycin, Cytosol) Plus GM-CSF (Granulocyte-Macrophage Colony Stimulating Factor) Plus Dose Escalation of IL-3 (Interleukin-3) in Metastatic Breast                              | Completed | Breast Neoplasms Neoplasm Metastasis                                           | Drug: IL-3                                                                                                                                                                                    | Phase 1 | 100 | May-91   | 4-Mar-08   |     |
| GM-CSF | NCT00001272 | A Phase I Study of Taxol, Cisplatin, Cyclophosphamide and Granulocyte Colony-Stimulating Factor (G-CSF) in Previously Nontreated Ovarian Cancer Patients                                                                              | Completed | Ovarian Neoplasms                                                              | Drug: taxol                                                                                                                                                                                   | Phase 1 | 60  | Sep-91   | 4-Mar-08   |     |
| GM-CSF | NCT00001338 | A Prospective, Randomized, Phase III Trial of FLAC (5-Fluorouracil, Leucovorin, Adriamycin, Cytosol) Chemotherapy With GM-CSF (Granulocyte-Macrophage Colony-Stimulating Factor) Versus PIXY 321                                      | Completed | Breast Neoplasms Fever Hematologic Diseases Neutropenia Sepsis                 | Drug: FLAC chemotherapy with GM-CSF                                                                                                                                                           | Phase 3 | 65  | Jun-93   | 4-Mar-08   |     |
| GM-CSF | NCT00001384 | A Pilot Trial of AC (Adriamycin, Cyclophosphamide) Chemotherapy With G-CSF (Granulocyte Colony-Stimulating Factor) Followed by Infusional Taxol (Paclitaxel) as Adjuvant Treatment for High Risk Stage II and Stage III Breast Cancer | Completed | Breast Cancer Breast Neoplasms                                                 | Drug: Adriamycin Drug: cyclophosphamide Drug: G-CSF Drug: paclitaxel                                                                                                                          | Phase 2 | 35  | May-94   | 4-Mar-08   |     |
| GM-CSF | NCT00001512 | Active Specific Immunotherapy for Follicular Lymphomas With Tumor-Derived Immunoglobulin Idiotypic                                                                                                                                    | Completed | B Cell Lymphoma Follicular Lymphoma Lymphoma                                   | Drug: Id-KLH Vaccine Drug: GM-CSF                                                                                                                                                             | Phase 1 | 42  | 9-Sep-96 | 2-Jul-17   |     |

|        |             |                                                                                                                                                                           |           |                                                                                                    |                                                                                                                                                                                                                                                                                                                                                                                                                                                                            |                                                                                                                                                                                                                                                             |         |      |            |               |
|--------|-------------|---------------------------------------------------------------------------------------------------------------------------------------------------------------------------|-----------|----------------------------------------------------------------------------------------------------|----------------------------------------------------------------------------------------------------------------------------------------------------------------------------------------------------------------------------------------------------------------------------------------------------------------------------------------------------------------------------------------------------------------------------------------------------------------------------|-------------------------------------------------------------------------------------------------------------------------------------------------------------------------------------------------------------------------------------------------------------|---------|------|------------|---------------|
| GM-CSF | NCT00001564 | A Pilot Study of Tumor-Specific Peptide Vaccination and IL-2 With or Without Autologous T Cell Transplantation in Recurrent                                               | Completed | Ewing's Sarcoma Rhabdomyosarcoma                                                                   | Drug: EF-1 Peptide Drug: EF-2 Peptide Drug: PFK Peptide Drug: E7 Peptide Drug: IL-2 Drug: IL-4 Drug: GM-CSF Drug: CD40 Ligand                                                                                                                                                                                                                                                                                                                                              |                                                                                                                                                                                                                                                             | Phase 2 | 30   | 23-Dec-96  | 29-Nov-19     |
| GM-CSF | NCT00001832 | Lymphocyte Re-infusion During Immune Suppression to Treat Metastatic Melanoma                                                                                             | Completed | Melanoma Neoplasm Metastasis                                                                       | Drug: gp100:209-217 (210M) Drug: Montanide ISA-51 Drug: IL-2 Drug: MART-1:26-35(27L) Biological: Abl cells Drug: Fludarabine Drug: Cyclophosphamide Biological: GCSF (Growth colony stimulating                                                                                                                                                                                                                                                                            | Clinical Response Number of Participants With Adverse Events                                                                                                                                                                                                | Phase 2 | 170  | Aug-99     | 21-Dec-12     |
| GM-CSF | NCT00002461 | Combination Chemotherapy Followed by Bone Marrow or Peripheral Stem Cell Transplantation in Treating Patients With Refractory Hodgkin's Disease or Non-Hodgkin's Lymphoma | Completed | Lymphoma                                                                                           | Biological: filgrastim Biological: sargramostim Drug: carmustine Drug: cisplatin Drug: cyclophosphamide Drug: etoposide Procedure: autologous bone marrow transplantation Procedure: in vitro-treated bone marrow transplantation Procedure: peripheral blood stem cell transplantation Radiation:                                                                                                                                                                         |                                                                                                                                                                                                                                                             | Phase 2 | 35   | April 1988 | 17-Aug-18     |
| GM-CSF | NCT00002475 | Cyclophosphamide Plus Vaccine Therapy in Treating Patients With Advanced Cancer                                                                                           | Completed | Breast Cancer Colorectal Cancer Kidney Cancer Lung Cancer Malignant Mesothelioma Pancreatic Cancer | Biological: allogeneic tumor cell vaccine Biological: autologous tumor cell vaccine Biological: recombinant interferon alfa Biological: recombinant interferon gamma Biological: sargramostim Drug: cyclophosphamide                                                                                                                                                                                                                                                       | Clinical response (patients with evaluable disease) Duration of response (patients with evaluable disease) Survival (patients with evaluable disease) Time to recurrence (patients without evaluable disease) Survival (patients without evaluable disease) | Phase 2 | 40   | April 1991 | 10-Jul-13     |
| GM-CSF | NCT00002501 | Cyclophosphamide and Filgrastim in Treating Patients With Stage IV, Relapsed, or Refractory Low-Grade Follicular Non-Hodgkin's Lymphoma                                   | Completed | Lymphoma                                                                                           | Biological: filgrastim Drug: cyclophosphamide                                                                                                                                                                                                                                                                                                                                                                                                                              | Toxicity                                                                                                                                                                                                                                                    | Phase 2 | 29   | Oct-92     | 1-Jul-16      |
| GM-CSF | NCT00002514 | Stem Cell Transplantation Compared With Standard Chemotherapy in Treating Patients With Acute Lymphoblastic Leukemia in First Remission                                   | Completed | Leukemia                                                                                           | Biological: sargramostim Drug: asparaginase Drug: cyclophosphamide Drug: cytarabine Drug: daunorubicin hydrochloride Drug: dexamethasone Drug: etoposide Drug: imatinib mesylate Drug: leucovorin calcium Drug: mercaptopurine Drug: methotrexate Drug: prednisone Drug: thioguanine Drug: vincristine sulfate Procedure: allogeneic bone marrow transplantation Procedure: autologous bone marrow transplantation Procedure:                                              | Overall Survival                                                                                                                                                                                                                                            | Phase 3 | 1929 | April 1993 | 22-Nov-12     |
| GM-CSF | NCT00002539 | Combination Chemotherapy and Surgery With or Without G-CSF in Treating Patients With Osteosarcoma                                                                         | Completed | Sarcoma                                                                                            | Biological: filgrastim Drug: cisplatin Drug: doxorubicin hydrochloride Procedure: conventional surgery                                                                                                                                                                                                                                                                                                                                                                     |                                                                                                                                                                                                                                                             | Phase 3 | 214  | Aug-93     | 24-Sep-12     |
| GM-CSF | NCT00002552 | Chemotherapy Plus Bone Marrow Transplantation in Treating Patients With Refractory Non-Hodgkin's Lymphoma, Hodgkin's Disease, or Multiple Myeloma                         | Completed | Lymphoma Multiple Myeloma and Plasma Cell Neoplasm                                                 | Biological: filgrastim Biological: sargramostim Drug: carmustine Drug: cyclophosphamide Drug: cytarabine Drug: etoposide Drug: leucovorin calcium Drug: methotrexate Drug: perfosamide Drug: therapeutic hydrocortisone Procedure: allogeneic bone marrow transplantation Procedure: autologous bone marrow transplantation Procedure: in vitro-treated bone marrow transplantation Procedure: peripheral blood stem cell transplantation Procedure: syngeneic bone marrow |                                                                                                                                                                                                                                                             | Phase 2 | 40   | Oct-93     | April 9, 2013 |
| GM-CSF | NCT00002560 | Monoclonal Antibody Therapy Plus Sargramostin in Treating Patients With Advanced Neuroblastoma                                                                            | Completed | Neuroblastoma                                                                                      | Biological: monoclonal antibody 3F8 Biological: sargramostim                                                                                                                                                                                                                                                                                                                                                                                                               |                                                                                                                                                                                                                                                             | Phase 2 | 40   | Feb-94     | 28-Jun-13     |
| GM-CSF | NCT00002571 | SWOG-9320 Combination Chemotherapy, Radiation Therapy, and Antiviral Therapy in Treating Patients With AIDS-Related Lymphoma                                              | Completed | Lymphoma                                                                                           | Biological: bleomycin sulfate Biological: filgrastim Drug: cyclophosphamide Drug: cytarabine Drug: doxorubicin hydrochloride Drug: etoposide Drug: leucovorin calcium Drug: methotrexate Drug: prednisone Drug: trimethoprim-sulfamethoxazole Drug: vincristine sulfate Radiation: radiation                                                                                                                                                                               | Response                                                                                                                                                                                                                                                    | Phase 2 | 52   | Jun-94     | 24-Jan-13     |

|        |             |                                                                                                                                                                          |           |                                                                                                           |                                                                                                                                                                                                                                                                                                                              |                                                                                                                                                                                                        |                 |     |        |           |
|--------|-------------|--------------------------------------------------------------------------------------------------------------------------------------------------------------------------|-----------|-----------------------------------------------------------------------------------------------------------|------------------------------------------------------------------------------------------------------------------------------------------------------------------------------------------------------------------------------------------------------------------------------------------------------------------------------|--------------------------------------------------------------------------------------------------------------------------------------------------------------------------------------------------------|-----------------|-----|--------|-----------|
| GM-CSF | NCT00002594 | Combination Chemotherapy Followed by Bone Marrow and/or Peripheral Stem Cell Transplantation in Treating Patients With Recurrent Medulloblastoma or CNS Germ Cell Tumors | Completed | Brain Tumor Central Nervous System Tumor                                                                  | Biological: Sargramostim Drug: cyclophosphamide Drug: melphaan Procedure: autologous bone marrow transplantation Procedure: bone marrow ablation with stem cell support Procedure: peripheral blood stem                                                                                                                     | Progression-free survival                                                                                                                                                                              | Phase 2         | 31  | Sep-94 | 24-Jul-14 |
| GM-CSF | NCT00002598 | Combination Chemotherapy and Interferon Alfa in Treating Patients With Chronic Myelogenous Leukemia                                                                      | Completed | Leukemia                                                                                                  | Biological: recombinant interferon alfa Biological: sargramostim Drug: cyclophosphamide Drug: cytarabine Drug: etoposide Drug: methotrexate Drug: mitoxantrone hydrochloride Procedure: bone marrow ablation with stem cell support Radiation: radiation therapy                                                             |                                                                                                                                                                                                        | Phase 2         | 30  | Jun-94 | 25-Jun-13 |
| GM-CSF | NCT00002610 | Chemotherapy With or Without Surgery, Radiation Therapy, or Stem Cell Transplantation in Treating Young Patients With Kidney Tumors                                      | Completed | Kidney Cancer                                                                                             | Biological: dactinomycin Biological: filgrastim Drug: carboplatin Drug: cyclophosphamide Drug: doxorubicin hydrochloride Drug: etoposide Drug: vincristine sulfate Procedure: conventional surgery Radiation: radiation therapy                                                                                              | Event free survival Event Free Survival Post-relapse survival Response rate                                                                                                                            | Phase 3         | 203 | Jan-96 | 25-Jul-14 |
| GM-CSF | NCT00002638 | Combination Chemotherapy Followed by Peripheral Stem Cell Transplantation in Treating Children With Relapsed Acute Lymphocytic Leukemia                                  | Completed | Leukemia                                                                                                  | Biological: filgrastim Biological: sargramostim Drug: carmustine Drug: cyclophosphamide Drug: cytarabine Drug: etoposide Procedure: peripheral blood stem cell transplantation Radiation:                                                                                                                                    |                                                                                                                                                                                                        | Phase 2         | 30  | Mar-95 | 10-Jul-13 |
| GM-CSF | NCT00002697 | Combination Chemotherapy Plus Radiation Therapy Followed by Peripheral Stem Cell Transplantation in Treating Patients With Non-Hodgkin's Lymphoma                        | Completed | Lymphoma                                                                                                  | Biological: filgrastim Biological: sargramostim Drug: carboplatin Drug: etoposide Drug: ifosfamide Procedure: autologous bone marrow transplantation Procedure: bone marrow ablation with stem cell support Procedure: peripheral blood stem cell                                                                            |                                                                                                                                                                                                        | Phase 2         |     | Sep-95 | 3-Jul-13  |
| GM-CSF | NCT00002740 | Combination Chemotherapy Plus Peripheral Stem Cell Transplantation Followed by Surgery and/or Radiation Therapy in Treating Young Patients With Advanced Neuroblastoma   | Completed | Neuroblastoma                                                                                             | Biological: filgrastim Drug: carboplatin Drug: cyclophosphamide Drug: doxorubicin hydrochloride Drug: etoposide Drug: mesna Drug: vincristine sulfate Procedure: conventional surgery Procedure: peripheral blood stem cell transplantation Radiation: low-LET cobalt-60 gamma ray therapy Radiation: low-LET photon therapy | Event Free Survival                                                                                                                                                                                    | Phase 1         | 30  | May-96 | 24-Jul-14 |
| GM-CSF | NCT00002766 | Comparison of Two Combination Chemotherapy Regimens in Treating Adults With Previously Untreated Leukemia or Lymphoma                                                    | Completed | Leukemia Lymphoma                                                                                         | Biological: dactinomycin Biological: sargramostim Drug: carmustine Drug: cyclophosphamide Drug: cytarabine Drug: daunorubicin hydrochloride Drug: doxorubicin hydrochloride Drug: etoposide Drug: mercaptopurine Drug: methotrexate Drug: mitoxantrone hydrochloride Drug: pegaspargase Drug: prednisone Drug: vincristine   | Complete Remission (CR)                                                                                                                                                                                | Phase 1 Phase 2 | 170 | Mar-96 | 22-Feb-16 |
| GM-CSF | NCT00002773 | Vaccine Therapy, Chemotherapy, and GM-CSF in Treating Patients With Advanced Pancreatic Cancer                                                                           | Completed | Pancreatic Cancer                                                                                         | Biological: allogeneic tumor cell vaccine Biological: recombinant interferon alfa Biological: sargramostim Drug: cyclophosphamide                                                                                                                                                                                            |                                                                                                                                                                                                        | Phase 2         |     | May-96 | 10-Jul-13 |
| GM-CSF | NCT00002787 | Vaccine Therapy in Treating Patients With Multiple Myeloma Who Have Undergone Stem Cell Transplantation                                                                  | Completed | Refractory Multiple Myeloma Stage I Multiple Myeloma Stage II Multiple Myeloma Stage III Multiple Myeloma | Biological: autologous immunoglobulin idiotype-KLH conjugate vaccine Biological: sargramostim Biological: aldesleukin Other: laboratory biomarker analysis                                                                                                                                                                   | Toxicities graded using the National Cancer Institute (NCI) Common Toxicity Criteria Immune response                                                                                                   | Phase 1         | 22  | Mar-96 | 6-May-19  |
| GM-CSF | NCT00002804 | Combination Chemotherapy, Surgery, and Radiation Therapy in Treating Children With Advanced Soft Tissue Sarcoma                                                          | Completed | Sarcoma                                                                                                   | Biological: filgrastim Drug: doxorubicin hydrochloride Drug: ifosfamide Drug: mesna Drug: vincristine sulfate Procedure: conventional surgery Radiation: brachytherapy Radiation: low-LET cobalt-60 gamma ray therapy Radiation: low-LET electron therapy Radiation: low-LET photon                                          | Estimate the response rate to the combination of vincristine, ifosfamide, and doxorubicin (VID), with G-CSF support Event-free Survival Establish a bank of frozen tissue (tumor and peripheral blood) | Phase 2         | 43  | Sep-96 | 25-Jul-14 |

|        |             |                                                                                                                                 |           |                                                                                                                               |                                                                                                                                                                                                                                   |                                                                                                                                                                                                                                           |         |     |            |            |
|--------|-------------|---------------------------------------------------------------------------------------------------------------------------------|-----------|-------------------------------------------------------------------------------------------------------------------------------|-----------------------------------------------------------------------------------------------------------------------------------------------------------------------------------------------------------------------------------|-------------------------------------------------------------------------------------------------------------------------------------------------------------------------------------------------------------------------------------------|---------|-----|------------|------------|
| GM-CSF | NCT00002809 | Bone Marrow Transplant Plus Cyclophosphamide and Total-Body Irradiation in Treating Patients With Hematologic Cancer            | Completed | Leukemia Myelodysplastic Syndromes Myelodysplastic/Myeloproliferative Diseases                                                | Biological: anti-thymocyte globulin Biological: filgrastim Biological: sargramostim Biological: therapeutic immune globulin Drug: cyclophosphamide Drug: methotrexate Drug: tacrolimus Procedure:                                 |                                                                                                                                                                                                                                           | Phase 2 | 10  | Aug-96     | 1-Oct-10   |
| GM-CSF | NCT00002827 | Chemotherapy Followed by Radiation Therapy in Treating Young Patients With Newly Diagnosed Hodgkin's Disease                    | Completed | Cardiac Toxicity Lymphoma                                                                                                     | Biological: bleomycin sulfate Biological: filgrastim Drug: dexrazoxane hydrochloride Drug: doxorubicin hydrochloride Drug: etoposide Drug: vincristine sulfate Radiation: low-LET cobalt-60 gamma ray therapy Radiation:          | DLCO                                                                                                                                                                                                                                      | Phase 3 | 294 | Oct-96     | 26-Aug-13  |
| GM-CSF | NCT00002995 | Combination Chemotherapy With or Without Radiation Therapy in Treating Patients With Newly Diagnosed Rhabdomyosarcoma           | Completed | Sarcoma                                                                                                                       | Biological: dactinomycin Biological: filgrastim Biological: sargramostim Drug: cyclophosphamide Drug: vincristine sulfate Radiation: radiation therapy                                                                            | Failure-free survival                                                                                                                                                                                                                     | Phase 3 | 483 | Aug-97     | 14-Feb-14  |
| GM-CSF | NCT00003002 | HER-2/Neu Vaccine Plus GM-CSF in Treating Patients With Stage III or Stage IV Breast, Ovarian, or Non-small Cell Lung Cancer    | Completed | Breast Cancer Lung Cancer Ovarian Cancer                                                                                      | Biological: HER-2/neu peptide vaccine Biological: sargramostim                                                                                                                                                                    |                                                                                                                                                                                                                                           | Phase 1 | 60  | April 1996 | 27-Feb-19  |
| GM-CSF | NCT00003003 | Mitomycin and Mitoxantrone in Treating Patients With Acute Myelogenous Leukemia                                                 | Completed | Leukemia                                                                                                                      | Biological: sargramostim Drug: mitomycin C Drug: mitoxantrone hydrochloride                                                                                                                                                       |                                                                                                                                                                                                                                           | Phase 1 | 29  | Sep-96     | 19-Mar-18  |
| GM-CSF | NCT00003007 | Interferon Alfa Following Chemotherapy and Peripheral Stem Cell Transplantation in Treating Patients With Stage III or Stage IV | Completed | Multiple Myeloma and Plasma Cell Neoplasm                                                                                     | Biological: recombinant interferon alfa Biological: sargramostim Drug: cyclophosphamide Drug: dexamethasone Drug:                                                                                                                 |                                                                                                                                                                                                                                           | Phase 2 |     | Jul-96     | 26-Jun-13  |
| GM-CSF | NCT00003093 | Combination Chemotherapy in Treating Children With Neuroblastoma                                                                | Completed | Neuroblastoma                                                                                                                 | Biological: filgrastim Biological: sargramostim Drug: carboplatin Drug: cyclophosphamide Drug: doxorubicin hydrochloride Drug: etoposide Procedure: conventional surgery Procedure: neoadjuvant therapy                           | Event Free Survival                                                                                                                                                                                                                       | Phase 3 | 573 | Mar-88     | 1-Aug-14   |
| GM-CSF | NCT00003114 | Combination Chemotherapy in Treating Patients With AIDS-Related Hodgkin's Disease                                               | Completed | Lymphoma                                                                                                                      | Biological: filgrastim Drug: cyclophosphamide Drug: etoposide Drug: lomustine Drug: procarbazine hydrochloride Radiation: radiation therapy                                                                                       | Determine the objective response rate, response duration, and survival of patients receiving lomustine/etoposide/cyclophosphamide/procarbazine (CECP) for stage IIB-IV AIDS-related Hodgkin's disease.                                    | Phase 2 | 5   | Jul-97     | 11-Jun-10  |
| GM-CSF | NCT00003119 | Surgery in Treating Children With Neuroblastoma                                                                                 | Completed | Neuroblastoma                                                                                                                 | Biological: filgrastim Biological: sargramostim Drug: carboplatin Drug: cyclophosphamide Drug: doxorubicin hydrochloride Drug: etoposide Procedure: adjuvant therapy Procedure: conventional surgery Radiation: radiation therapy | Estimate the 3 year survival rate for low risk asymptomatic stage 2A/2B patients who are treated with surgery alone                                                                                                                       | Phase 3 | 968 | Mar-98     | 13-Mar-17  |
| GM-CSF | NCT00003125 | Vaccine Therapy, Interleukin-2, and Sargramostim in Treating Patients With Advanced Tumors                                      | Completed | Breast Cancer Esophageal Cancer Gastric Cancer Lung Cancer Pancreatic Cancer Unspecified Adult Solid Tumor, Protocol Specific | Biological: ALVAC-CEA vaccine Biological: aldesleukin Biological: sargramostim Biological: vaccinia-CEA                                                                                                                           |                                                                                                                                                                                                                                           | Phase 2 | 24  | Jan-98     | 24-Mar-11  |
| GM-CSF | NCT00003141 | Chemotherapy Plus Peripheral Stem Cell Transplantation in Treating Infants With Malignant Brain or Spinal Cord Tumors           | Completed | Brain Tumors Central Nervous System Tumors Neuroblastoma Sarcoma                                                              | Biological: filgrastim Drug: carboplatin Drug: cisplatin Drug: cyclophosphamide Drug: etoposide Drug: thiotepa Drug: vincristine sulfate Procedure: conventional surgery Procedure: peripheral blood stem cell transplantation    | Feasibility Maximal tolerated dose of thiotepa for consolidation therapy Overall rates of significant toxicities including grade IV ototoxicity, electrolytic wasting (grade IV), and hemorrhagic cystitis (grade IV) Event Free Survival | Phase 1 | 94  | Mar-98     | 28-Mar-14  |
| GM-CSF | NCT00003178 | Chemotherapy in Treating Children With Recurrent Acute Myeloid                                                                  | Completed | Leukemia                                                                                                                      | Biological: filgrastim Drug: cladribine Drug: idarubicin                                                                                                                                                                          | Event Free Survival                                                                                                                                                                                                                       | Phase 2 | 120 | Mar-98     | 25-Jul-14  |
| GM-CSF | NCT00003184 | Vaccine Therapy in Treating Women With Metastatic Breast Cancer                                                                 | Completed | Breast Cancer                                                                                                                 | Biological: BCG vaccine Biological: CD80 breast cancer vaccine Biological:                                                                                                                                                        |                                                                                                                                                                                                                                           | Phase 1 |     | Aug-96     | April 2013 |
| GM-CSF | NCT00003185 | Biological Therapy in Treating Patients With Glioblastoma Multiforme                                                            | Completed | Brain and Central Nervous System Tumors                                                                                       | Biological: autologous tumor cell vaccine Biological: sargramostim Biological: tumor-draining lymph node lymphocyte therapy Drug: cyclophosphamide Procedure: conventional                                                        |                                                                                                                                                                                                                                           | Phase 2 | 40  | Aug-97     | 4-Dec-13   |

|        |             |                                                                                                                                                                                                    |           |                                                                                                                                                                                                                                                                           |                                                                                                                                                                                                                                                                                                                            |                                                                                                                                                                                                                                                            |         |    |            |           |
|--------|-------------|----------------------------------------------------------------------------------------------------------------------------------------------------------------------------------------------------|-----------|---------------------------------------------------------------------------------------------------------------------------------------------------------------------------------------------------------------------------------------------------------------------------|----------------------------------------------------------------------------------------------------------------------------------------------------------------------------------------------------------------------------------------------------------------------------------------------------------------------------|------------------------------------------------------------------------------------------------------------------------------------------------------------------------------------------------------------------------------------------------------------|---------|----|------------|-----------|
| GM-CSF | NCT00003199 | Combination Chemotherapy and Peripheral Blood Stem Cell Transplant Followed By Aldesleukin and Sargramostim in Treating Patients With Inflammatory Stage IIIB or Metastatic Stage IV Breast Cancer | Completed | Estrogen Receptor-negative Breast Cancer Estrogen Receptor-positive Breast Cancer Inflammatory Breast Cancer Male Breast Cancer Progesterone Receptor-negative Breast Cancer Progesterone Receptor-positive Breast Cancer Stage IIIB Breast Cancer Stage IV Breast Cancer | Drug: tamoxifen citrate Drug: busulfan Drug: thiotepa Drug: melphalan Biological: aldesleukin Biological: sargramostim Procedure: peripheral blood stem cell transplantation Radiation: radiation therapy                                                                                                                  | Event-free Survival Overall Survival Number of Participants With Toxicity of a Combination of Low-dose IL-2 and GM-CSF                                                                                                                                     | Phase 2 | 50 | Nov-97     | 12-Jul-17 |
| GM-CSF | NCT00003217 | Combination Chemotherapy in Treating Children With Stage III or Stage IV Non-Hodgkin's Lymphoma or Acute Lymphoblastic Leukemia                                                                    | Completed | Leukemia Lymphoma                                                                                                                                                                                                                                                         | Biological: filgrastim Drug: cyclophosphamide Drug: cytarabine Drug: dexamethasone Drug: doxorubicin hydrochloride Drug: methotrexate Drug: vincristine sulfate                                                                                                                                                            | Event Free Survival                                                                                                                                                                                                                                        | Phase 1 | 20 | Mar-98     | 25-Jul-14 |
| GM-CSF | NCT00003222 | Vaccine Therapy Plus Interleukin-2 in Treating Patients With Stage III or Stage IV Melanoma                                                                                                        | Completed | Melanoma (Skin)                                                                                                                                                                                                                                                           | Biological: aldesleukin Biological: gp100 antigen Biological: incomplete Freund's adjuvant Biological: sargramostim Biological: tetanus peptide melanoma vaccine Biological: tyrosinase peptide                                                                                                                            | Evaluation of Objective Clinical Response (CR/PR/SD) Measure of Tumor-antigen-specific Immunity in Peripheral Blood Mononuclear Cells (PBMC) by Elispot Assay Measure of Tumor-antigen-specific Immunity in Sentinel Immunized Node (SIN) by Elispot Assay | Phase 2 | 40 | April 1998 | 19-Dec-14 |
| GM-CSF | NCT00003269 | Amifostine Followed by High Dose Chemotherapy in Treating Patients With Hematologic Cancer or Solid                                                                                                | Completed | Breast Cancer Drug/Agent Toxicity by Tissue/Organ Lung Cancer Lymphoma Ovarian Cancer Unspecified Adult Solid Tumor, Protocol Specific                                                                                                                                    | Biological: sargramostim Drug: amifostine trihydrate Drug: cisplatin Drug: cyclophosphamide Drug: etoposide                                                                                                                                                                                                                | duration of neutropenia incidence of nephrotoxicity incidence of ototoxicity                                                                                                                                                                               | Phase 2 | 20 | Feb-98     | 10-Jan-11 |
| GM-CSF | NCT00003274 | Vaccine Therapy in Treating Patients With Stage II Melanoma That Can Be Removed by Surgery                                                                                                         | Completed | Melanoma (Skin)                                                                                                                                                                                                                                                           | Biological: gp100 antigen Biological: incomplete Freund's adjuvant Biological: sargramostim Biological: tyrosinase peptide                                                                                                                                                                                                 |                                                                                                                                                                                                                                                            | Phase 2 | 48 | Mar-98     | 22-May-14 |
| GM-CSF | NCT00003362 | Vaccine Therapy Plus Immune Adjuvants in Treating Patients With Advanced Melanoma                                                                                                                  | Completed | Melanoma (Skin)                                                                                                                                                                                                                                                           | Biological: QS21 Biological: gp100 antigen Biological: incomplete Freund's adjuvant Biological: sargramostim Biological: tyrosinase peptide                                                                                                                                                                                |                                                                                                                                                                                                                                                            | Phase 2 |    | May-98     | 25-Jun-13 |
| GM-CSF | NCT00003397 | Peripheral Stem Cell Transplantation Plus Combination Chemotherapy and Monoclonal Antibody Therapy in Treating Patients With Non-Hodgkin's Lymphoma                                                | Completed | Lymphoma                                                                                                                                                                                                                                                                  | Biological: filgrastim Biological: rituximab Biological: sargramostim Drug: carmustine Drug: cisplatin Drug: cyclophosphamide Drug: dexamethasone Drug: etoposide Drug: gemcitabine hydrochloride Drug: melphalan Drug: paclitaxel Procedure: bone marrow ablation with stem cell support Procedure: peripheral blood stem |                                                                                                                                                                                                                                                            | Phase 2 | 25 | Sep-98     | 4-Nov-19  |
| GM-CSF | NCT00003408 | Biological Therapy Following Chemotherapy and Peripheral Stem Cell Transplantation in Treating Patients With Cancer                                                                                | Completed | Breast Cancer Chronic Myeloproliferative Disorders Gestational Trophoblastic Tumor Kidney Cancer Leukemia Lymphoma Multiple Myeloma and Plasma Cell Neoplasm Myelodysplastic Syndromes Neuroblastoma Ovarian                                                              | Biological: aldesleukin Biological: recombinant interferon alfa Biological: sargramostim                                                                                                                                                                                                                                   |                                                                                                                                                                                                                                                            | Phase 2 | 40 | April 1998 | 26-Mar-13 |
| GM-CSF | NCT00003490 | Combination Chemotherapy Following GM-CSF in Treating Patients With Multiple Myeloma                                                                                                               | Completed | Multiple Myeloma and Plasma Cell Neoplasm                                                                                                                                                                                                                                 | Biological: sargramostim Drug: cyclophosphamide Drug: prednisone Drug: vincristine sulfate                                                                                                                                                                                                                                 |                                                                                                                                                                                                                                                            | Phase 2 | 30 | Oct-98     | 4-Dec-13  |
| GM-CSF | NCT00003573 | Etoposide Plus Radiation Therapy Followed by Combination Chemotherapy in Treating Children With Newly Diagnosed Advanced                                                                           | Completed | Brain Tumors Central Nervous System Tumors                                                                                                                                                                                                                                | Biological: filgrastim Drug: cisplatin Drug: cyclophosphamide Drug: etoposide Drug: vincristine sulfate Radiation: radiation therapy                                                                                                                                                                                       | Assess the efficacy of oral etoposide at 50 mg/m2/day given concurrently with radiotherapy followed with dose intensive adjuvant chemotherapy in children with newly diagnosed high stage medulloblastoma                                                  | Phase 2 | 53 | Nov-98     | 25-Jul-14 |
| GM-CSF | NCT00003597 | Colony-Stimulating Factors in Treating Children With Recurrent or Refractory Solid Tumors                                                                                                          | Completed | Cancer                                                                                                                                                                                                                                                                    | Biological: recombinant human thrombopoietin Drug: carboplatin Drug: etoposide Drug: ifosfamide Biological: G-                                                                                                                                                                                                             | Determine the pharmacokinetics and toxicities associated with the administration of recombinant human thrombopoietin (rTPO) Evaluate the time for patients to demonstrate platelet recovery                                                                | Phase 1 | 16 | Nov-98     | 24-Jul-14 |
| GM-CSF | NCT00003727 | Chemotherapy and Peripheral Stem Cell Transplantation Followed by Immunotherapy in Treating Patients With Chronic Myelogenous Leukemia                                                             | Completed | Leukemia                                                                                                                                                                                                                                                                  | Biological: filgrastim Biological: recombinant interferon alfa Biological: sargramostim Biological: therapeutic autologous lymphocytes Drug: carmustine Drug: cyclophosphamide Drug: etoposide Drug: gemcitabine hydrochloride Drug: melphalan Procedure: bone marrow ablation with stem cell                              | Response (i.e., major cytogenetic or molecular response) within 12 months after completion of study therapy Mortality rate                                                                                                                                 | Phase 2 | 22 | Mar-99     | 4-Nov-19  |
| GM-CSF | NCT00003739 | Antibiotic Therapy With or Without G-CSF in Treating Children With Neutropenia and Fever Caused by                                                                                                 | Completed | Fever, Sweats, and Hot Flashes Neutropenia Unspecified Childhood Solid Tumor, Protocol Specific                                                                                                                                                                           | Biological: filgrastim                                                                                                                                                                                                                                                                                                     | Time to Resolution of Febrile Neutropenia Incidence of Change of the Initial Empiric Antibiotic Treatment                                                                                                                                                  | Phase 3 | 67 | Mar-99     | 14-Feb-14 |
| GM-CSF | NCT00003897 | Vaccine Therapy With gp100 and/or Sargramostim in Treating Patients With Malignant Melanoma                                                                                                        | Completed | Melanoma (Skin)                                                                                                                                                                                                                                                           | Biological: gp100 antigen Biological: sargramostim                                                                                                                                                                                                                                                                         |                                                                                                                                                                                                                                                            | Phase 1 | 18 | May-99     | 19-Nov-19 |



|        |             |                                                                                                                                                          |           |                                                                                                                                                                                                                                                                                                                                                                                       |                                                                                                                                                                                                                                                                       |                                                                                                                                                                                                                                                                                                                                                                                                                                                                                                                             |                 |     |                |                |
|--------|-------------|----------------------------------------------------------------------------------------------------------------------------------------------------------|-----------|---------------------------------------------------------------------------------------------------------------------------------------------------------------------------------------------------------------------------------------------------------------------------------------------------------------------------------------------------------------------------------------|-----------------------------------------------------------------------------------------------------------------------------------------------------------------------------------------------------------------------------------------------------------------------|-----------------------------------------------------------------------------------------------------------------------------------------------------------------------------------------------------------------------------------------------------------------------------------------------------------------------------------------------------------------------------------------------------------------------------------------------------------------------------------------------------------------------------|-----------------|-----|----------------|----------------|
| GM-CSF | NCT00003955 | Combination Chemotherapy Plus Radiation Therapy in Treating Patients With Metastatic Rhabdomyosarcoma or Sarcoma                                         | Completed | Sarcoma                                                                                                                                                                                                                                                                                                                                                                               | Biological: dactinomycin Biological: filgrastim Biological: pegfilgrastim Biological: sargramostim Drug: cyclophosphamide Drug: hydrochloride Drug: irinotecan Drug: vincristine sulfate Radiation: radiation therapy                                                 | Event Free Survival                                                                                                                                                                                                                                                                                                                                                                                                                                                                                                         | Phase 2         | 77  | Sep-99         | 14-Feb-14      |
| GM-CSF | NCT00003958 | Combination Chemotherapy in Treating Patients With Previously Untreated Rhabdomyosarcoma                                                                 | Completed | Adult Malignant Mesenchymoma Adult Rhabdomyosarcoma Alveolar Childhood Rhabdomyosarcoma Childhood Malignant Mesenchymoma Embryonal Childhood Rhabdomyosarcoma Embryonal-botryoid Childhood Rhabdomyosarcoma Nonmetastatic Childhood Soft Tissue Sarcoma Previously Untreated Childhood Rhabdomyosarcoma Stage I Adult Soft Tissue Sarcoma Stage II Adult Soft Tissue Sarcoma Stage II | Biological: dactinomycin Drug: vincristine sulfate Drug: cyclophosphamide Procedure: therapeutic conventional surgery Radiation: radiation therapy Drug: topotecan hydrochloride Biological: filgrastim Biological: sargramostim Other: laboratory biomarker analysis | Long-term failure-free survival (FFS) between the two treatment groups Overall survival between treatments Rate of second look surgery Proportion of patients rendered tumor-free or with microscopic tumor only Estimation of the rate of local failure for the patients who undergo second look surgery                                                                                                                                                                                                                   | Phase 3         | 702 | Sep-02         | 17-Jun-13      |
| GM-CSF | NCT00003959 | Vaccine Therapy in Treating Patients With Myelodysplastic Syndrome                                                                                       | Completed | Leukemia Myelodysplastic Syndromes                                                                                                                                                                                                                                                                                                                                                    | Biological: ras peptide cancer vaccine Biological: sargramostim                                                                                                                                                                                                       |                                                                                                                                                                                                                                                                                                                                                                                                                                                                                                                             | Phase 1         | 1   | Jun-99         | 16-Jan-13      |
| GM-CSF | NCT00003961 | Sargramostim After Bone Marrow Transplantation in Treating Patients With Myelodysplastic Syndrome                                                        | Completed | Leukemia Myelodysplastic Syndromes Myelodysplastic/Myeloproliferative Diseases                                                                                                                                                                                                                                                                                                        | Biological: sargramostim                                                                                                                                                                                                                                              |                                                                                                                                                                                                                                                                                                                                                                                                                                                                                                                             | Phase 2         |     | April 1999     | April 17, 2014 |
| GM-CSF | NCT00003972 | Combination Chemotherapy and Peripheral Stem Cell Transplantation in Treating Patients With Stage II or Stage IIIA Breast Cancer                         | Completed | Breast Cancer                                                                                                                                                                                                                                                                                                                                                                         | Biological: filgrastim Biological: sargramostim Drug: busulfan Drug: carboplatin Drug: cyclophosphamide Drug: melphalan Drug: paclitaxel Drug: tamoxifen citrate Drug: thiotepa Procedure: peripheral blood stem cell transplantation Radiation: radiation therapy    |                                                                                                                                                                                                                                                                                                                                                                                                                                                                                                                             | Phase 3         | 280 | Jul-98         | April 2, 2010  |
| GM-CSF | NCT00004024 | Biological Therapy Following Surgery and Radiation Therapy in Treating Patients With Primary or Recurrent Astrocytoma or Oligodendroglioma               | Completed | Brain and Central Nervous System Tumors                                                                                                                                                                                                                                                                                                                                               | Biological: aldesleukin Biological: autologous tumor cell vaccine Biological: muromonab-CD3 Biological: sargramostim Biological: therapeutic autologous lymphocytes Procedure: surgical procedure Radiation: radiation therapy                                        |                                                                                                                                                                                                                                                                                                                                                                                                                                                                                                                             | Phase 2         | 60  | Jun-97         | April 5, 2013  |
| GM-CSF | NCT00004029 | Vaccine Therapy in Treating Patients With Metastatic Prostate Cancer                                                                                     | Completed | Prostate Cancer                                                                                                                                                                                                                                                                                                                                                                       | Biological: recombinant viral vaccine therapy Biological: sargramostim                                                                                                                                                                                                |                                                                                                                                                                                                                                                                                                                                                                                                                                                                                                                             | Phase 1         | 46  | Dec-96         | 11-Feb-13      |
| GM-CSF | NCT00004056 | Combination Chemotherapy Followed by Melphalan and Peripheral Stem Cell Transplantation in Treating Children With Newly Diagnosed Acute Myeloid Leukemia | Completed | Leukemia                                                                                                                                                                                                                                                                                                                                                                              | Biological: filgrastim Drug: asparaginase Drug: cytarabine Drug: daunorubicin hydrochloride Drug: melphalan Drug: thioguanine Procedure: peripheral blood stem cell transplantation                                                                                   | Feasibility and toxicity of an intensive regimen that uses timed-sequential therapy Feasibility and toxicity of a single high dose of melphalan with peripheral stem cell rescue Make observations regarding PCR evidence of Minimal Residual Disease                                                                                                                                                                                                                                                                       | Phase 1         | 35  | Oct-99         | 28-Jul-14      |
| GM-CSF | NCT00004088 | Combination Chemo, Peripheral Stem Cell Transplant, Biological Therapy, Pamidronate and Thalidomide for Multiple Myeloma                                 | Completed | Multiple Myeloma and Plasma Cell Neoplasm                                                                                                                                                                                                                                                                                                                                             | Biological: filgrastim Biological: recombinant interferon alfa Drug: busulfan Drug: cyclophosphamide Drug: melphalan Drug: pamidronate disodium Drug: thalidomide Procedure: peripheral blood stem cell transplantation                                               | Best Response Prior to Tandem Autologous Stem Cell Transplant Response After Tandem Autologous Stem Cell Transplant Three-year Overall Survival Progression-free Survival Best Response at 6 Months Post Tandem Autologous Stem Cell Transplant Best Response After Tandem Autologous Stem Cell Transplant and Maintenance                                                                                                                                                                                                  | Phase 3         | 77  | April 13, 1999 | 2-Jul-19       |
| GM-CSF | NCT00004141 | Combination Chemotherapy Plus Biological Therapy in Treating Patients With Metastatic Melanoma                                                           | Completed | Melanoma (Skin)                                                                                                                                                                                                                                                                                                                                                                       | Drug: Cisplatin Drug: dacarbazine Drug: Granulocyte-macrophage colony-stimulating factor                                                                                                                                                                              | Objective response rate                                                                                                                                                                                                                                                                                                                                                                                                                                                                                                     | Phase 2         | 46  | Aug-98         | 5-Sep-13       |
| GM-CSF | NCT00004162 | Liposomal Doxorubicin Plus Combination Chemotherapy in Treating Patients With AIDS-Associated Non-Hodgkin's Lymphoma                                     | Completed | Lymphoma                                                                                                                                                                                                                                                                                                                                                                              | Biological: sargramostim Drug: methotrexate Drug: pegylated liposomal doxorubicin hydrochloride Drug: vincristine sulfate                                                                                                                                             | Determine the toxicity and maximum tolerated dose of doxorubicin HCl liposome when administered with combination chemotherapy in patients with AIDS-associated non-Hodgkin's lymphoma. Determine the optimal phase II dose of doxorubicin HCl liposome to be administered with the combination chemotherapy regimen. Determine the effect of this regimen on HIV viral load in these patients Determine the clinical response to this regimen                                                                               | Phase 1         | 48  | Jun-97         | April 12, 2013 |
| GM-CSF | NCT00004184 | Monoclonal Antibody Therapy in Treating Patients With Stage III or Stage IV Melanoma                                                                     | Completed | Melanoma (Skin)                                                                                                                                                                                                                                                                                                                                                                       | Biological: monoclonal antibody 4B5 anti-idiotype vaccine Biological: sargramostim Drug: alum adjuvant                                                                                                                                                                | Compare AEs and SAES in subjects receiving 4B5 plus adjuvant sargramostim (GM-CSF) to alum in patients with stage III or IV melanoma at high risk for recurrence following surgical resection. Compare the development of humoral and/or cellular anti-idiotypic immune response between arm I and arm II Compare if the immune response generated against 4B5 is also directed against the melanoma-associated GD2 antigen between Arm I and Arm III Measure the immune response to GD2 between subjects receiving the 4B5 | Phase 1 Phase 2 | 50  | Aug-98         | April 12, 2013 |

|        |             |                                                                                                                                              |           |                                                                                                                                                                                                                                                               |                                                                                                                                                                                                                                                                                                                                                                                           |                                                                                                                                                                                                                                                                                                                                                                                                                                                                                                                                     |                 |     |          |           |
|--------|-------------|----------------------------------------------------------------------------------------------------------------------------------------------|-----------|---------------------------------------------------------------------------------------------------------------------------------------------------------------------------------------------------------------------------------------------------------------|-------------------------------------------------------------------------------------------------------------------------------------------------------------------------------------------------------------------------------------------------------------------------------------------------------------------------------------------------------------------------------------------|-------------------------------------------------------------------------------------------------------------------------------------------------------------------------------------------------------------------------------------------------------------------------------------------------------------------------------------------------------------------------------------------------------------------------------------------------------------------------------------------------------------------------------------|-----------------|-----|----------|-----------|
| GM-CSF | NCT00004188 | Combination Chemotherapy and Peripheral Stem Cell Transplantation in Treating Patients With Neuroblastoma                                    | Completed | Neuroblastoma                                                                                                                                                                                                                                                 | Biological: filgrastim Drug: carboplatin Drug: cisplatin Drug: cyclophosphamide Drug: doxorubicin hydrochloride Drug: etoposide Drug: isotretinoin Drug: melphalan Drug: topotecan hydrochloride Drug: vincristine sulfate Procedure: autologous bone marrow transplantation Procedure: bone marrow ablation with stem cell support Procedure: conventional surgery Procedure: peripheral | Event-free survival rate Rate of occurrence of toxic (non disease-related) deaths where a toxic death will be "counted" if it occurs prior to the initiation of the immunotherapy Time to engraftment CD34 content Tumor content as measured by reverse transcriptase polymerase chain reaction                                                                                                                                                                                                                                     | Phase 3         | 495 | Feb-01   | 17-May-13 |
| GM-CSF | NCT00004189 | Rebecamycin Analog and Cisplatin With or Without Filgrastim in Treating Patients With Advanced Cancer                                        | Completed | Lymphoma Small Intestine Cancer Unspecified Adult Solid Tumor, Protocol Specific                                                                                                                                                                              | Biological: filgrastim Drug: becatecarin Drug: cisplatin                                                                                                                                                                                                                                                                                                                                  |                                                                                                                                                                                                                                                                                                                                                                                                                                                                                                                                     | Phase 1         | 40  | Oct-99   | 11-Feb-13 |
| GM-CSF | NCT00004192 | Colony-Stimulating Factors to Relieve Neutropenia in Patients With Recurrent Non-Hodgkin's Lymphoma                                          | Completed | Lymphoma Neutropenia                                                                                                                                                                                                                                          | Biological: filgrastim Biological: pegfilgrastim Drug: cisplatin Drug: cytarabine Drug: etoposide Drug: methylprednisolone                                                                                                                                                                                                                                                                |                                                                                                                                                                                                                                                                                                                                                                                                                                                                                                                                     | Phase 2         | 60  | May-00   | 17-Jan-18 |
| GM-CSF | NCT00004197 | Vaccine Therapy Plus Sargramostim Following Chemotherapy in Treating Patients With Previously Untreated Aggressive Non-Hodgkin's Lymphoma    | Completed | Lymphoma                                                                                                                                                                                                                                                      | Biological: keyhole limpet hemocyanin Biological: sargramostim Biological: tumor cell-based vaccine therapy Drug: cyclophosphamide Drug: doxorubicin hydrochloride Drug: mitoxantrone                                                                                                                                                                                                     |                                                                                                                                                                                                                                                                                                                                                                                                                                                                                                                                     | Phase 2         |     | Jun-99   | 17-Jan-18 |
| GM-CSF | NCT00004198 | Vaccine Therapy Plus Sargramostim Following Chemotherapy in Treating Patients With Stage III or Stage IV Non-Hodgkin's Lymphoma              | Completed | Lymphoma                                                                                                                                                                                                                                                      | Biological: keyhole limpet hemocyanin Biological: sargramostim Biological: tumor cell-based vaccine therapy                                                                                                                                                                                                                                                                               |                                                                                                                                                                                                                                                                                                                                                                                                                                                                                                                                     | Phase 2         |     | Jun-99   | 17-Jan-18 |
| GM-CSF | NCT00004217 | S9918 PSC 833, Daunorubicin, and Cytarabine in Treating Older Patients With Newly Diagnosed Acute Myeloid Leukemia                           | Completed | Leukemia                                                                                                                                                                                                                                                      | Biological: filgrastim Biological: sargramostim Drug: cytarabine Drug: daunorubicin hydrochloride Drug: valsopodar                                                                                                                                                                                                                                                                        | response                                                                                                                                                                                                                                                                                                                                                                                                                                                                                                                            | Phase 2         | 55  | Feb-00   | 6-Mar-15  |
| GM-CSF | NCT00004256 | Sargramostim to Prevent Mucositis in Patients Receiving Radiation Therapy for Laryngeal Cancer                                               | Completed | Head and Neck Cancer Oral Complications Radiation Toxicity                                                                                                                                                                                                    | Biological: sargramostim Procedure: quality-of-life assessment Radiation: radiation therapy                                                                                                                                                                                                                                                                                               |                                                                                                                                                                                                                                                                                                                                                                                                                                                                                                                                     | Phase 2         |     | Oct-97   | 6-Nov-13  |
| GM-CSF | NCT00004853 | Comparison of Filgrastim and Filgrastim SD/01 in Boosting White Cell Counts After Intensive Chemotherapy                                     | Completed | Ewing's Sarcoma Rhabdomyosarcoma MPNST Synovial Sarcoma High-risk Sarcoma                                                                                                                                                                                     | Biological: Filgrastim Biological: Filgrastim-SD/01                                                                                                                                                                                                                                                                                                                                       | Tolerance and toxicity PKs Compare neutrophil function Compare CD34 positive stem cell mobilization Compare days of febrile neutropenia, days on antibiotics, and inpatient days resulting from neutropenia Evaluate the role of functional cardiac MRI and serum troponin T levels in detecting early doxorubicin cardiotoxicity Assess methods of detecting minimal residual disease cDNA microarray analysis of gene expression, development of cell lines and xenotransplantation models, and exploration of apoptotic pathways | Phase 1         | 34  | 3-Mar-00 | 12-Nov-19 |
| GM-CSF | NCT00004918 | Vaccine Therapy Plus Immune Adjuvant in Treating Patients With Chronic Myeloid Leukemia, Acute Myeloid Leukemia, or Myelodysplastic Syndrome | Completed | Accelerated Phase Chronic Myelogenous Leukemia Adult Acute Myeloid Leukemia in Remission Chronic Phase Chronic Myelogenous Leukemia Previously Treated Myelodysplastic Syndromes Refractory Anemia With Excess Blasts Refractory Anemia With Excess Blasts in | Biological: PR1 leukemia peptide vaccine Drug: Montanide ISA 51 VG Biological: sargramostim Other: laboratory biomarker analysis                                                                                                                                                                                                                                                          | Adverse event DTOX (death or autoimmune toxicity or vascular toxicity at any time) assessed using Common Toxicity Criteria (CTC) version 2.0 Ability of dose T cell receptor (TCR) activity Clinical response Duration of first immune response (IR) Survival time                                                                                                                                                                                                                                                                  | Phase 1 Phase 2 | 69  | Dec-99   | 7-Jan-13  |
| GM-CSF | NCT00005023 | Vaccine Therapy Plus Sargramostim in Treating Patients With Stage III or Stage IV Cancer                                                     | Completed | Breast Cancer Lung Cancer Ovarian Cancer                                                                                                                                                                                                                      | Biological: HER-2/neu peptide vaccine Biological: sargramostim                                                                                                                                                                                                                                                                                                                            |                                                                                                                                                                                                                                                                                                                                                                                                                                                                                                                                     | Phase 1         |     | Mar-99   | 30-Nov-17 |
| GM-CSF | NCT00005576 | Monoclonal Antibody Therapy With Sargramostim and Interleukin-2 in Treating Children With                                                    | Completed | Disseminated Neuroblastoma Regional Neuroblastoma                                                                                                                                                                                                             | Biological: monoclonal antibody Ch14.18 Drug: isotretinoin Biological: aldesleukin Biological: sargramostim                                                                                                                                                                                                                                                                               | Maximum tolerated dose of monoclonal antibody (MOAB) ch14.18 when combined with sargramostim and IL-2 after autologous bone marrow or peripheral blood stem cell rescue in children with neuroblastoma                                                                                                                                                                                                                                                                                                                              | Phase 1         | 6   | Jan-01   | 16-Jan-13 |
| GM-CSF | NCT00005578 | Combination Chemotherapy With or Without Dexrazoxane in Treating Children With Hodgkin's Disease                                             | Completed | Cardiac Toxicity Lymphoma                                                                                                                                                                                                                                     | Biological: bleomycin sulfate Biological: filgrastim Drug: cyclophosphamide Drug: dexrazoxane hydrochloride Drug: doxorubicin hydrochloride Drug: etoposide Drug: prednisone Drug: vincristine sulfate Radiation: radiation                                                                                                                                                               | Diffusing capacity of the lungs for carbon monoxide (DLCO)                                                                                                                                                                                                                                                                                                                                                                                                                                                                          | Phase 3         | 219 | Mar-97   | 24-Jul-14 |
| GM-CSF | NCT00005601 | Combination Chemotherapy Plus Rituximab in Treating Patients With Relapsed Non-Hodgkin's Lymphoma                                            | Completed | Lymphoma                                                                                                                                                                                                                                                      | Biological: rituximab Drug: cisplatin Drug: cytarabine Drug: dexamethasone Drug: sargramostim                                                                                                                                                                                                                                                                                             | response percentage of patients able to proceed to transplant after two courses of this treatment regimen duration of response overall survival                                                                                                                                                                                                                                                                                                                                                                                     | Phase 2         | 58  | Oct-00   | 7-Dec-16  |
| GM-CSF | NCT00005610 | Study of Aerosolized Sargramostim in Treating Patients With Melanoma Metastatic to the Lung                                                  | Completed | Melanoma (Skin) Metastatic Cancer                                                                                                                                                                                                                             | Biological: sargramostim                                                                                                                                                                                                                                                                                                                                                                  | Progression-free survival Median survival Quality of life                                                                                                                                                                                                                                                                                                                                                                                                                                                                           | Phase 2         | 28  | Sep-00   | 13-Jul-16 |

|        |            |                                                                                                                                    |           |                                      |                                                                                                                                                                                                                                                                                                      |                                                                                                                                                                                                                                                                                          |                |     |          |                |
|--------|------------|------------------------------------------------------------------------------------------------------------------------------------|-----------|--------------------------------------|------------------------------------------------------------------------------------------------------------------------------------------------------------------------------------------------------------------------------------------------------------------------------------------------------|------------------------------------------------------------------------------------------------------------------------------------------------------------------------------------------------------------------------------------------------------------------------------------------|----------------|-----|----------|----------------|
| GM-CSF | NCT0005630 | Vaccine Therapy and Sargramostim in Treating Patients With Non-small Cell Lung Cancer                                              | Completed | Lung Cancer                          | Biological: ras peptide cancer vaccine Biological: sargramostim                                                                                                                                                                                                                                      |                                                                                                                                                                                                                                                                                          | Phase 1        |     | Jul-99   | 19-Jun-13      |
| GM-CSF | NCT0005947 | Vaccine Therapy in Treating Patients With Metastatic Prostate Cancer That Has Not Responded to Hormone                             | Completed | Prostate Cancer                      | Biological: sipuleucel-T Biological: Placebo                                                                                                                                                                                                                                                         | Time to Objective Disease Progression Overall Survival                                                                                                                                                                                                                                   | Phase 3        | 127 | Nov-99   | 1-Nov-10       |
| GM-CSF | NCT0005948 | Chemotherapy Followed by Peripheral Stem Cell Transplantation And Biological Therapy in Treating Patients With Chronic Myelogenous | Completed | Leukemia                             | Biological: aldesleukin Biological: recombinant interferon alfa Biological: sargramostim Drug: busulfan Procedure: peripheral blood stem cell transplantation                                                                                                                                        |                                                                                                                                                                                                                                                                                          | Phase 2        |     | Jan-00   | April 2, 2010  |
| GM-CSF | NCT0005962 | Comparison of Three Treatment Regimens in Treating Patients With Relapsed or Refractory Acute Myelogenous Leukemia                 | Completed | Leukemia                             | Biological: sargramostim Drug: cyclophosphamide Drug: cytarabine Drug: gemtuzumab ozogamicin Drug: liposomal daunorubicin citrate Drug: topotecan hydrochloride                                                                                                                                      |                                                                                                                                                                                                                                                                                          | Phase 2        |     | Jul-00   | 20-Aug-13      |
| GM-CSF | NCT0005977 | Combination Chemotherapy in Treating Patients With Non-Hodgkin's Lymphoma or Acute Lymphocytic Leukemia                            | Completed | Leukemia Lymphoma                    | Biological: filgrastim Drug: cyclophosphamide Drug: cytarabine Drug: dexamethasone Drug: doxorubicin hydrochloride Drug: etoposide Drug: ifosfamide Drug: leucovorin calcium Drug: methotrexate Drug: vincristine sulfate                                                                            | Event-free survival                                                                                                                                                                                                                                                                      | Phase 3        | 83  | Sep-00   | 21-Aug-13      |
| GM-CSF | NCT0006184 | Chemotherapy, Stem Cell Transplantation and Donor and Patient Vaccination for Treatment of Multiple Myeloma                        | Completed | Multiple Myeloma                     | Drug: Myeloma Immunoglobulin Idiotype Vaccine Drug: Bortezomib Drug: Cyclophosphamide Drug: Cyclosporine Drug: Doxorubicin hydrochloride Drug: Etoposide Drug: Fludarabine phosphate Drug: Prednisone Drug: Vincristine Sulfate Drug: Methotrexate Biological: GM-CSF (granulocyte macrophage colony | Immune Response Number of Participants With Adverse Events                                                                                                                                                                                                                               | Phase 2        | 20  | 8-Feb-01 | 20-Oct-17      |
| GM-CSF | NCT0006240 | Phenylbutyrate, Dexamethasone, and Sargramostim in Treating Patients With Refractory or Relapsed Acute Myeloid Leukemia            | Completed | Leukemia                             | Biological: sargramostim Drug: dexamethasone Drug: oral sodium phenylbutyrate                                                                                                                                                                                                                        |                                                                                                                                                                                                                                                                                          | Phase 2        |     | Oct-00   | April 28, 2015 |
| GM-CSF | NCT0006243 | Vaccine Therapy and Sargramostim in Treating Patients With Stage IV Malignant Melanoma                                             | Completed | Recurrent Melanoma Stage IV Melanoma | Biological: tyrosinase peptide Biological: MART-1:27-35 peptide vaccine Biological: gp100 antigen Biological: incomplete Freund's adjuvant Biological: sargramostim Other: laboratory biomarker                                                                                                      | Changes in tumor antigen peptide specific immune responses Number and severity of hematologic and non-hematologic toxicities observed using the Common Toxicity Criteria (CTC) version 2.0 Proportion of objective responses (complete response [CR] and partial response [PR]) observed | Not Applicable | 30  | Oct-00   | 25-Jan-13      |
| GM-CSF | NCT0006385 | Vaccine Therapy With or Without Biological Therapy in Treating Patients With Metastatic Melanoma                                   | Completed | Melanoma (Skin)                      | Biological: MART-1 antigen Biological: gp100 antigen Biological: incomplete Freund's adjuvant Biological: recombinant interferon alfa Biological: sargramostim Biological: tyrosinase peptide                                                                                                        |                                                                                                                                                                                                                                                                                          | Phase 2        |     | Sep-00   | 8-Nov-11       |
| GM-CSF | NCT0006483 | Sargramostim in Treating Patients With Kidney Cancer That Has Spread to the Lung                                                   | Completed | Kidney Cancer Metastatic Cancer      | Biological: sargramostim                                                                                                                                                                                                                                                                             | Determine the 4-month progression-free survival rate Determine the 4-month overall survival rate                                                                                                                                                                                         | Phase 2        | 27  | Oct-00   | 13-Jul-16      |
| GM-CSF | NCT0006734 | Comparison of Combination Chemotherapy Regimens in Treating Patients With Ewing's Sarcoma or Neuroectodermal Tumor                 | Completed | Sarcoma                              | Biological: filgrastim Drug: cyclophosphamide Drug: doxorubicin hydrochloride Drug: etoposide Drug: ifosfamide Drug: vincristine sulfate Procedure: adjuvant therapy Procedure: conventional surgery Procedure: neoadjuvant therapy Radiation:                                                       | Event-free survival                                                                                                                                                                                                                                                                      | Phase 3        | 587 | May-01   | 17-May-13      |
| GM-CSF | NCT0006747 | Combination Chemotherapy Followed by Peripheral Stem Cell Transplantation in Treating Patients With Mantle Cell Lymphoma           | Completed | Graft Versus Host Disease Lymphoma   | Drug: carmustine Drug: melphalan Drug: etoposide Drug: cytarabine Drug: tacrolimus Drug: methotrexate Drug: sargramostim Procedure: transplant                                                                                                                                                       | disease free survival                                                                                                                                                                                                                                                                    | Phase 2        | 4   | Nov-00   | 19-Jul-16      |

|        |             |                                                                                                                                                                                   |           |                                                                                                                                                                                                                                                                                                                                                                                                                                                                                                                                                                                                                                                                                                 |                                                                                                                                                                                                                                                                                                        |                                                                                                                                                                                                                                                                                                                                                                                                                                                                                                                                                                                                                     |         |      |            |                |
|--------|-------------|-----------------------------------------------------------------------------------------------------------------------------------------------------------------------------------|-----------|-------------------------------------------------------------------------------------------------------------------------------------------------------------------------------------------------------------------------------------------------------------------------------------------------------------------------------------------------------------------------------------------------------------------------------------------------------------------------------------------------------------------------------------------------------------------------------------------------------------------------------------------------------------------------------------------------|--------------------------------------------------------------------------------------------------------------------------------------------------------------------------------------------------------------------------------------------------------------------------------------------------------|---------------------------------------------------------------------------------------------------------------------------------------------------------------------------------------------------------------------------------------------------------------------------------------------------------------------------------------------------------------------------------------------------------------------------------------------------------------------------------------------------------------------------------------------------------------------------------------------------------------------|---------|------|------------|----------------|
| GM-CSF | NCT00007904 | Adjuvant Stage 2-3A Breast Cancer With Positive Lymph Nodes                                                                                                                       | Completed | Breast Cancer                                                                                                                                                                                                                                                                                                                                                                                                                                                                                                                                                                                                                                                                                   | Biological: filgrastim Drug: cyclophosphamide Drug: doxorubicin hydrochloride Drug: paclitaxel Drug: tamoxifen citrate Procedure: adjuvant therapy Radiation: radiation therapy                                                                                                                        | To determine the safety of administering continuous infusion paclitaxel with dose intense cyclophosphamide To determine the incidence of febrile neutropenia with the first cycle of therapy. To determine days of neutrophil counts below 500/uL on this regimen during the first treatment cycle. To evaluate dose delays and dose reductions of this regimen. To determine disease-free and overall survival of this regimen. Quality of life as assessed by Functional Assessment of Cancer Therapy-Breast (FACT-B) questionnaire Correlation of Her2/neu overexpression with disease-free and overall survival | Phase 2 | 16   | Jul-00     | 2-Oct-12       |
| GM-CSF | NCT00007995 | Chemotherapy Plus Peripheral Stem Cell Transplant in Treating Patients Who Have Multiple Myeloma or Primary Systemic Amyloidosis                                                  | Completed | Multiple Myeloma and Plasma Cell Neoplasm                                                                                                                                                                                                                                                                                                                                                                                                                                                                                                                                                                                                                                                       | Biological: filgrastim Biological: recombinant interferon alfa Biological: sargramostim Drug: busulfan Drug: cyclophosphamide Drug: melphalan Procedure: autologous bone marrow transplantation Procedure: bone marrow ablation with stem cell                                                         | Disease-free survival at 2 years (patients with responsive disease) Duration of hematologic toxicity Time to an absolute neutrophil count Platelet independence                                                                                                                                                                                                                                                                                                                                                                                                                                                     | Phase 2 | 75   | Jul-99     | 4-Feb-13       |
| GM-CSF | NCT00008008 | Thiotepa Followed by Peripheral Stem Cell or Bone Marrow Transplant in Treating Patients With Malignant Glioma                                                                    | Completed | Brain and Central Nervous System Tumors                                                                                                                                                                                                                                                                                                                                                                                                                                                                                                                                                                                                                                                         | Biological: filgrastim Biological: sargramostim Drug: cyclophosphamide Drug: thiotepa Procedure: autologous bone marrow transplantation Procedure: bone marrow ablation with stem cell                                                                                                                 | Response rate Disease-free interval Overall survival Toxicity Pharmacokinetics Presence of high-dose thiotepa in the cerebrospinal fluid                                                                                                                                                                                                                                                                                                                                                                                                                                                                            | Phase 2 | 40   | Sep-97     | 4-Feb-13       |
| GM-CSF | NCT00008398 | Sargramostim in Decreasing Mucositis in Patients Receiving Radiation Therapy for Head and                                                                                         | Completed | Head and Neck Cancer Oral Complications Radiation Toxicity                                                                                                                                                                                                                                                                                                                                                                                                                                                                                                                                                                                                                                      | Biological: sargramostim Procedure: quality-of-life assessment Radiation: radiation therapy                                                                                                                                                                                                            |                                                                                                                                                                                                                                                                                                                                                                                                                                                                                                                                                                                                                     | Phase 3 |      | Oct-00     | 19-Nov-13      |
| GM-CSF | NCT00011934 | Bone Marrow Transplantation Plus Biological Therapy in Treating Patients With Chronic Myeloid                                                                                     | Completed | Leukemia                                                                                                                                                                                                                                                                                                                                                                                                                                                                                                                                                                                                                                                                                        | Biological: recombinant interferon alfa Biological: sargramostim Procedure: autologous bone marrow transplantation                                                                                                                                                                                     |                                                                                                                                                                                                                                                                                                                                                                                                                                                                                                                                                                                                                     | Phase 2 |      | May-98     | April 17, 2014 |
| GM-CSF | NCT00012376 | Chemotherapy Plus Sargramostim in Treating Patients With Refractory Myeloid Cancer                                                                                                | Completed | Accelerated Phase Chronic Myelogenous Leukemia Adult Acute Myeloid Leukemia With 11q23 (MLL) Abnormalities Adult Acute Myeloid Leukemia With Del(5q) Adult Acute Myeloid Leukemia With Inv(16)(p13;q22) Adult Acute Myeloid Leukemia With t(15;17)(q22;q12) Adult Acute Myeloid Leukemia With t(16;16)(p13;q22) Adult Acute Myeloid Leukemia With t(8;21)(q22;q22) Blastic Phase Chronic Myelogenous Leukemia Chronic Myelomonocytic Leukemia Chronic Phase Chronic Myelogenous Leukemia Paroxysmal Nocturnal Hemoglobinuria Previously Treated Myelodysplastic Syndromes Recurrent Adult Acute Myeloid Leukemia Refractory Anemia Refractory Anemia With Ringed Sideroblasts Relapsing Chronic | Drug: bryostatin 1 Biological: sargramostim Other: laboratory biomarker analysis Other: pharmacological study                                                                                                                                                                                          | MTD defined as the dose at which the CRM estimates that 30% of patients will experience dose-limiting toxicity (DLT) assessed using CTC version 2.0                                                                                                                                                                                                                                                                                                                                                                                                                                                                 | Phase 1 | 35   | Mar-01     | 9-Jan-13       |
| GM-CSF | NCT00014092 | Chemotherapy Followed by Biological Therapy in Treating Patients With Stage IV Melanoma That Cannot be Treated With                                                               | Completed | Melanoma (Skin)                                                                                                                                                                                                                                                                                                                                                                                                                                                                                                                                                                                                                                                                                 | Biological: aldesleukin Biological: recombinant interferon alfa Biological: sargramostim Drug: temozolomide                                                                                                                                                                                            |                                                                                                                                                                                                                                                                                                                                                                                                                                                                                                                                                                                                                     | Phase 2 |      | Dec-99     | 26-Mar-13      |
| GM-CSF | NCT00014222 | Combination Chemotherapy With or Without Colony-stimulating Factors in Treating Women With Breast Cancer                                                                          | Completed | Breast Cancer                                                                                                                                                                                                                                                                                                                                                                                                                                                                                                                                                                                                                                                                                   | Biological: epoetin alfa Biological: filgrastim Drug: cyclophosphamide Drug: doxorubicin hydrochloride Drug: epirubicin hydrochloride Drug: fluorouracil Drug:                                                                                                                                         | Disease free survival Overall survival Safety profile Quality of Life                                                                                                                                                                                                                                                                                                                                                                                                                                                                                                                                               | Phase 3 | 2104 | Dec-00     | 18-Mar-14      |
| GM-CSF | NCT00014508 | Chemotherapy and Peripheral Stem Cell Transplantation in Treating Patients With Multiple Myeloma                                                                                  | Completed | Multiple Myeloma and Plasma Cell Neoplasm                                                                                                                                                                                                                                                                                                                                                                                                                                                                                                                                                                                                                                                       | Biological: sargramostim Drug: cyclophosphamide Drug: cyclosporine Drug: fludarabine phosphate Drug: melphalan Procedure: peripheral blood stem cell transplantation                                                                                                                                   |                                                                                                                                                                                                                                                                                                                                                                                                                                                                                                                                                                                                                     | Phase 2 |      | April 2001 | 2-Jan-19       |
| GM-CSF | NCT00014573 | Chemotherapy and Vaccine Therapy Followed by Bone Marrow or Peripheral Stem Cell Transplantation and Interleukin-2 in Treating Patients With Recurrent or Refractory Brain Cancer | Completed | Brain and Central Nervous System Tumors                                                                                                                                                                                                                                                                                                                                                                                                                                                                                                                                                                                                                                                         | Biological: aldesleukin Biological: autologous tumor cell vaccine Biological: filgrastim Biological: sargramostim Biological: therapeutic autologous lymphocytes Drug: carmustine Drug: cisplatin Drug: cyclophosphamide Drug: paclitaxel Procedure: autologous bone marrow transplantation Procedure: |                                                                                                                                                                                                                                                                                                                                                                                                                                                                                                                                                                                                                     | Phase 2 |      | Aug-98     | April 2013 8,  |
| GM-CSF | NCT00017121 | Inhaled Sargramostim in Treating Patients With Melanoma Metastatic                                                                                                                | Completed | Melanoma (Skin) Metastatic Cancer                                                                                                                                                                                                                                                                                                                                                                                                                                                                                                                                                                                                                                                               | Biological: sargramostim                                                                                                                                                                                                                                                                               | Progression-free survival Overall survival Objective response rate                                                                                                                                                                                                                                                                                                                                                                                                                                                                                                                                                  | Phase 1 | 40   | May-02     | 6-Jul-16       |

|        |             |                                                                                                                                                |           |                                                                                                                                                                                                           |                                                                                                                                                                                                                                                                                                                                                  |                                                                                                                                                                                                                                                                                                                                                                                                                                                                                                                 |         |      |            |                |
|--------|-------------|------------------------------------------------------------------------------------------------------------------------------------------------|-----------|-----------------------------------------------------------------------------------------------------------------------------------------------------------------------------------------------------------|--------------------------------------------------------------------------------------------------------------------------------------------------------------------------------------------------------------------------------------------------------------------------------------------------------------------------------------------------|-----------------------------------------------------------------------------------------------------------------------------------------------------------------------------------------------------------------------------------------------------------------------------------------------------------------------------------------------------------------------------------------------------------------------------------------------------------------------------------------------------------------|---------|------|------------|----------------|
| GM-CSF | NCT00017368 | Combination Chemotherapy Plus Peripheral Stem Cell Transplantation in Treating Children With Newly Diagnosed Neuroblastoma                     | Completed | Neuroblastoma                                                                                                                                                                                             | Biological: filgrastim Biological: sargramostim Drug: carboplatin Drug: cisplatin Drug: cyclophosphamide Drug: doxorubicin hydrochloride Drug: etoposide Drug: etoposide phosphate Drug: ifosfamide Drug: isotretinoin Drug: melphalan Drug: thiotepa Drug: vincristine sulfate Procedure: conventional surgery Procedure: peripheral blood stem | Transplant-related mortality Incidence of symptomatic CMV, disseminated adenovirus infection, or EBV-LPD Event-free Survival                                                                                                                                                                                                                                                                                                                                                                                    | Phase 2 | 42   | April 2001 | 13-Feb-14      |
| GM-CSF | NCT00019084 | Vaccine Therapy and Biological Therapy in Treating Patients With Advanced Cancer                                                               | Completed | Breast Cancer Cervical Cancer Colorectal Cancer Lung Cancer Ovarian Cancer Pancreatic Cancer                                                                                                              | Biological: aldesleukin Biological: mutant p53 peptide pulsed dendritic cell vaccine Biological: ras peptide cancer vaccine Biological: sargramostim Biological: therapeutic autologous lymphocytes Biological: therapeutic tumor                                                                                                                |                                                                                                                                                                                                                                                                                                                                                                                                                                                                                                                 | Phase 2 |      | Feb-96     | 20-Jun-13      |
| GM-CSF | NCT00019097 | Vaccine Therapy in Treating Patients With Multiple Myeloma                                                                                     | Completed | Stage II Multiple Myeloma Stage III Multiple Myeloma Refractory Plasma Cell Neoplasm                                                                                                                      | Drug: autologous tumor cell vaccine Drug: keyhole limpet hemocyanin Drug: melphalan Drug: sargramostim                                                                                                                                                                                                                                           |                                                                                                                                                                                                                                                                                                                                                                                                                                                                                                                 | Phase 2 |      | Jul-95     | 20-Jun-13      |
| GM-CSF | NCT00019331 | Vaccine Therapy Plus Biological Therapy in Treating Adults With Metastatic Solid Tumors                                                        | Completed | Colorectal Cancer Endometrial Cancer Head and Neck Cancer Liver Cancer Lung Cancer Melanoma (Skin) Pancreatic Cancer Testicular Germ Cell Tumor Unspecified Adult Solid Tumor, Protocol Specific          | Biological: aldesleukin Biological: ras peptide cancer vaccine Biological: sargramostim Drug: DetoxPC                                                                                                                                                                                                                                            |                                                                                                                                                                                                                                                                                                                                                                                                                                                                                                                 | Phase 2 |      | Oct-97     | 20-Jun-13      |
| GM-CSF | NCT00019383 | Vaccine Therapy in Treating Patients With Recurrent or Refractory Metastatic Melanoma                                                          | Completed | Melanoma (Skin)                                                                                                                                                                                           | Biological: aldesleukin Biological: incomplete Freund's adjuvant Biological: sargramostim Biological: tyrosinase peptide Biological: tyrosinase-related                                                                                                                                                                                          |                                                                                                                                                                                                                                                                                                                                                                                                                                                                                                                 | Phase 2 |      | Jan-98     | 20-Jun-13      |
| GM-CSF | NCT00019890 | Vaccine Therapy in Treating Patients With High-Risk Stage III or Completely Resected Metastatic                                                | Completed | Stage IV Melanoma Stage III Melanoma Recurrent Melanoma                                                                                                                                                   | Drug: dendritic cell-gp100-MART-1 antigen vaccine Drug: sargramostim                                                                                                                                                                                                                                                                             |                                                                                                                                                                                                                                                                                                                                                                                                                                                                                                                 | Phase 2 |      |            | 20-Jun-13      |
| GM-CSF | NCT00020254 | Vaccine Therapy Plus Sargramostim and Interleukin-2 Compared With Nilutamide Alone in Treating Patients With Prostate Cancer                   | Completed | Prostate Cancer                                                                                                                                                                                           | Biological: aldesleukin Biological: recombinant fowlpox-prostate specific antigen vaccine Biological: recombinant vaccinia prostate-specific antigen vaccine Biological: recombinant vaccinia-B7.1 vaccine Biological:                                                                                                                           |                                                                                                                                                                                                                                                                                                                                                                                                                                                                                                                 | Phase 2 |      | Jun-00     | April 29, 2015 |
| GM-CSF | NCT00021333 | Paclitaxel and Cisplatin Plus Radiation Therapy Followed by Filgrastim in Treating Patients With Recurrent Head and Neck Cancer or             | Completed | Head and Neck Cancer Lung Cancer                                                                                                                                                                          | Biological: filgrastim Drug: cisplatin Drug: paclitaxel Radiation: radiation therapy                                                                                                                                                                                                                                                             |                                                                                                                                                                                                                                                                                                                                                                                                                                                                                                                 | Phase 2 | 29   | Sep-99     | April 17, 2013 |
| GM-CSF | NCT00023777 | S0112 Cytarabine and Daunorubicin in Treating Older Patients With Acute Myeloid Leukemia                                                       | Completed | Leukemia                                                                                                                                                                                                  | Biological: filgrastim Biological: sargramostim Drug: cytarabine Drug: daunorubicin hydrochloride                                                                                                                                                                                                                                                | CR                                                                                                                                                                                                                                                                                                                                                                                                                                                                                                              | Phase 2 | 71   | Aug-01     | 6-Mar-15       |
| GM-CSF | NCT00025363 | Comparison of Chemotherapy Regimens in Treating Children With Relapsed or Progressive Rhabdomyosarcoma                                         | Completed | Alveolar Childhood Rhabdomyosarcoma Embryonal Childhood Rhabdomyosarcoma Embryonal-botryoid Childhood Rhabdomyosarcoma Previously Treated Childhood Rhabdomyosarcoma Recurrent Childhood Rhabdomyosarcoma | Drug: vincristine sulfate Drug: irinotecan hydrochloride Drug: cyclophosphamide Drug: doxorubicin hydrochloride Drug: ifosfamide Drug: etoposide Drug: tirapazamine Biological: filgrastim Biological: sargramostim Other: pharmacological study Other:                                                                                          | Response at week 6 of investigational window therapy (unfavorable risk patients) Incidence of DLT when tirapazamine is given in combination with cyclophosphamide and doxorubicin, graded according to the NCI CTC v 2.0 Incidence of toxicities associated with the two administration schedules of irinotecan in combination with vincristine, graded according to the NCI CTC v 2.0 (unfavorable risk patients) Blood metabolite SN-38 levels (unfavorable risk patients) Progression-free survival Survival | Phase 2 | 150  | Nov-01     | 17-Jan-13      |
| GM-CSF | NCT00026312 | Isotretinoin With or Without Dinutuximab, Aldesleukin, and Sargramostim Following Stem Cell Transplant in Treating Patients With Neuroblastoma | Completed | Localized Resectable Neuroblastoma Localized Unresectable Neuroblastoma Recurrent Neuroblastoma Regional Neuroblastoma Stage 4 Neuroblastoma Stage 4S Neuroblastoma                                       | Biological: Aldesleukin Biological: Dinutuximab Drug: Isotretinoin Other: Laboratory Biomarker Analysis Other: Pharmacological Study Other: Quality-of-Life Assessment Biological: Sargramostim                                                                                                                                                  | Event-Free Survival (EFS) Event-Free Survival (EFS) of Patients From the Non-randomized Portion of the Trial Incidence of Toxicities Assessed Using Common Terminology Criteria for Adverse Events Version 4.0 Number of Courses of Therapy Delivered Overall Survival (OS) Overall Survival (OS) of Patients From the Non-randomized Portion of the Trial                                                                                                                                                      |         | 1449 | Oct-01     | 10-May-17      |
| GM-CSF | NCT00027599 | APC8015 and Bevacizumab in Treating Patients With Prostate Cancer                                                                              | Completed | Prostate Cancer                                                                                                                                                                                           | Biological: bevacizumab Biological: prostatic acid phosphatase-sargramostim fusion protein Biological: sipuleucel-T Biological: therapeutic autologous dendritic cells Procedure: in vitro-treated peripheral blood stem cell transplantation                                                                                                    |                                                                                                                                                                                                                                                                                                                                                                                                                                                                                                                 | Phase 2 | 25   | Dec-01     | 11-Feb-13      |
| GM-CSF | NCT00027807 | Biological Therapy in Treating Women With Stage IV Breast Cancer                                                                               | Completed | Breast Cancer                                                                                                                                                                                             | Biological: Aldesleukin Biological: Sargramostim Biological: therapeutic autologous lymphocytes                                                                                                                                                                                                                                                  | Maximum tolerated dose Toxicity profile Clinical responses Overall survival and progression-free survival Immune changes                                                                                                                                                                                                                                                                                                                                                                                        | Phase 1 | 6    | Oct-01     | 17-Feb-16      |

|        |             |                                                                                                                                           |           |                                                                                                                                                                                                                                                                                                                                                                                                                                                                                                                                                                                                                                                                                                                                                                                                                                                                                                                                                                                                                                                                                                                                                                                                                               |                                                                                                                                                                                                                                                                             |                                                                                                                                                                                                             |                 |     |        |           |
|--------|-------------|-------------------------------------------------------------------------------------------------------------------------------------------|-----------|-------------------------------------------------------------------------------------------------------------------------------------------------------------------------------------------------------------------------------------------------------------------------------------------------------------------------------------------------------------------------------------------------------------------------------------------------------------------------------------------------------------------------------------------------------------------------------------------------------------------------------------------------------------------------------------------------------------------------------------------------------------------------------------------------------------------------------------------------------------------------------------------------------------------------------------------------------------------------------------------------------------------------------------------------------------------------------------------------------------------------------------------------------------------------------------------------------------------------------|-----------------------------------------------------------------------------------------------------------------------------------------------------------------------------------------------------------------------------------------------------------------------------|-------------------------------------------------------------------------------------------------------------------------------------------------------------------------------------------------------------|-----------------|-----|--------|-----------|
| GM-CSF | NCT00027846 | Observation or Radiation Therapy and/or Chemotherapy and Second Surgery in Treating Children Who Have Undergone Surgery for Ependymoma    | Completed | Brain Tumor Central Nervous System Tumor                                                                                                                                                                                                                                                                                                                                                                                                                                                                                                                                                                                                                                                                                                                                                                                                                                                                                                                                                                                                                                                                                                                                                                                      | Biological: filgrastim Drug: carboplatin Drug: cyclophosphamide Drug: etoposide Drug: vincristine sulfate Radiation: radiation therapy Drug: Mesna Procedure: therapeutic conventional surgery                                                                              | Event-free Survival Overall Survival Rate of Gross-total or Near-total Resection and Second Surgery After Chemotherapy Event-free Survival (EFS) Local Control and Patterns of Failure                      | Phase 2         | 378 | Aug-03 | 7-Aug-19  |
| GM-CSF | NCT00027937 | Combination Chemotherapy, Peripheral Stem Cell Transplantation, and Biological Therapy in Treating Patients With Solid Tumors or Lymphoma | Completed | Lymphoma Unspecified Adult Solid Tumor, Protocol Specific Unspecified Childhood Solid Tumor, Protocol Specific                                                                                                                                                                                                                                                                                                                                                                                                                                                                                                                                                                                                                                                                                                                                                                                                                                                                                                                                                                                                                                                                                                                | Biological: aldesleukin Biological: filgrastim Biological: sargramostim Drug: busulfan Drug: cyclophosphamide Drug: melphalan Drug: paclitaxel Drug: thiotepa Procedure: bone marrow ablation with stem cell support Procedure: in vitro-treated peripheral blood stem cell |                                                                                                                                                                                                             | Phase 2         |     | Aug-01 | 14-May-10 |
| GM-CSF | NCT00028496 | Vaccine Therapy With or Without Sargramostim in Treating Patients With Advanced or Metastatic Cancer                                      | Completed | Adenocarcinoma of the Colon Adenocarcinoma of the Gallbladder Adenocarcinoma of the Pancreas Adenocarcinoma of the Rectum Adult Primary Hepatocellular Carcinoma Advanced Adult Primary Liver Cancer Cholangiocarcinoma of the Gallbladder Diffuse Adenocarcinoma of the Stomach Intestinal Adenocarcinoma of the Stomach Male Breast Cancer Mixed Adenocarcinoma of the Stomach Ovarian Endometrioid Adenocarcinoma Paget Disease of the Breast With Intraductal Carcinoma Paget Disease of the Breast With Invasive Ductal Carcinoma Recurrent Adult Primary Liver Cancer Recurrent Breast Cancer Recurrent Colon Cancer Recurrent Gallbladder Cancer Recurrent Gastric Cancer Recurrent Malignant Testicular Germ Cell Tumor Recurrent Pancreatic Cancer Recurrent Rectal Cancer Recurrent Salivary Gland Cancer Salivary Gland Adenocarcinoma Stage II Malignant Testicular Germ Cell Tumor Stage II Pancreatic Cancer Stage III Colon Cancer Stage III Gastric Cancer Stage III Malignant Testicular Germ Cell Tumor Stage III Pancreatic Cancer Stage III Rectal Cancer Stage III Salivary Gland Cancer Stage IIIA Breast Cancer Stage IIIB Breast Cancer Stage IV Breast Cancer Stage IV Colon Cancer Stage IV Gastric | Biological: recombinant fowlpox-CEA(6D)/TRICOM vaccine Biological: sargramostim Biological: recombinant fowlpox GM-CSF vaccine adjuvant                                                                                                                                     | Maximum tolerated dose of recombinant fowlpox-CEA(6D)/TRICOM vaccine determined by dose-limiting toxicities graded according to NCI Common Toxicity Criteria, version 2.0                                   | Phase 1         | 48  | Nov-01 | 25-Jan-13 |
| GM-CSF | NCT00030342 | Biological Therapy and Chemotherapy in Treating Patients With Metastatic Kidney Cancer or                                                 | Completed | Colorectal Cancer Kidney Cancer                                                                                                                                                                                                                                                                                                                                                                                                                                                                                                                                                                                                                                                                                                                                                                                                                                                                                                                                                                                                                                                                                                                                                                                               | Biological: recombinant interferon alfa Biological: sargramostim Biological: therapeutic autologous lymphocytes Drug:                                                                                                                                                       | Response as measured by RECIST guidelines and Kaplan-Meier method at 5 years Survival as measured by the Kaplan-Meier method at 5 years Safety as measured by NCI common toxicity table at study completion | Phase 1 Phase 2 | 60  | Nov-01 | 26-Jun-13 |
| GM-CSF | NCT00031629 | Combination Chemotherapy and Filgrastim or Pegfilgrastim in Treating Patients With Recurrent or Persistent Cancer of the Uterus           | Completed | Recurrent Uterine Corpus Sarcoma Uterine Corpus Leiomyosarcoma                                                                                                                                                                                                                                                                                                                                                                                                                                                                                                                                                                                                                                                                                                                                                                                                                                                                                                                                                                                                                                                                                                                                                                | Drug: Docetaxel Biological: Filgrastim Drug: Gemcitabine Hydrochloride Biological: Pegfilgrastim                                                                                                                                                                            | Frequency and duration of objective response Frequency of severity of observed adverse effects assessed using CTC version 2.0                                                                               | Phase 2         | 51  | Jan-05 | 8-Dec-16  |
| GM-CSF | NCT00031733 | Vaccine Therapy and Interleukin-12 With Either Alum or Sargramostim After Surgery in Treating Patients With Melanoma                      | Completed | Intraocular Melanoma Melanoma (Skin)                                                                                                                                                                                                                                                                                                                                                                                                                                                                                                                                                                                                                                                                                                                                                                                                                                                                                                                                                                                                                                                                                                                                                                                          | Biological: MART-1 antigen Biological: gp100 antigen Biological: incomplete Freund's adjuvant Biological: recombinant interleukin-12 Biological: sargramostim Biological: tyrosinase peptide Drug: alum adjuvant Procedure: adjuvant therapy                                |                                                                                                                                                                                                             | Phase 2         | 60  | Feb-02 | 22-May-14 |

|        |             |                                                                                                                                                             |           |                                                                                                                                                                        |                                                                                                                                                                                                                                                                                                                                                                                                                                                                                                                                                                                                                     |                                                                                                                                                                                                |                |     |            |           |
|--------|-------------|-------------------------------------------------------------------------------------------------------------------------------------------------------------|-----------|------------------------------------------------------------------------------------------------------------------------------------------------------------------------|---------------------------------------------------------------------------------------------------------------------------------------------------------------------------------------------------------------------------------------------------------------------------------------------------------------------------------------------------------------------------------------------------------------------------------------------------------------------------------------------------------------------------------------------------------------------------------------------------------------------|------------------------------------------------------------------------------------------------------------------------------------------------------------------------------------------------|----------------|-----|------------|-----------|
| GM-CSF | NCT00040872 | Multiple Therapies in Treating Patients With Advanced Neuroblastoma                                                                                         | Completed | Neuroblastoma                                                                                                                                                          | Biological: filgrastim Biological: monoclonal antibody 3F8 Biological: sargramostim Drug: carboplatin Drug: cisplatin Drug: cyclophosphamide Drug: doxorubicin hydrochloride Drug: etoposide Drug: isotretinoin Drug: thiotepa Drug: topotecan hydrochloride Drug: vincristine sulfate Procedure: autologous bone marrow transplantation Procedure: bone marrow ablation with stem cell support Procedure: conventional surgery Procedure: drug resistance inhibition treatment Procedure: peripheral blood stem cell transplantation Procedure: syngeneic bone marrow transplantation Radiation: radiation therapy |                                                                                                                                                                                                | Phase 2        |     | Jun-00     | 7-Mar-13  |
| GM-CSF | NCT00040937 | S0204 Thalidomide, Chemotherapy, and Peripheral Stem Cell Transplant in Treating Patients With Multiple Myeloma                                             | Completed | Multiple Myeloma                                                                                                                                                       | Biological: filgrastim Biological: sargramostim Drug: cyclophosphamide Drug: dexamethasone Drug: melphalan Drug: prednisone Drug: thalidomide Procedure:                                                                                                                                                                                                                                                                                                                                                                                                                                                            | Overall Survival Assess Toxicity of Thalidomide/Dexamethasone as a Pre-transplant Induction Regimen.                                                                                           | Phase 2        | 147 | Jun-02     | 8-Dec-16  |
| GM-CSF | NCT00045227 | Vaccine Therapy With or Without Docetaxel in Treating Patients With Metastatic Prostate Cancer                                                              | Completed | Prostate Cancer                                                                                                                                                        | Biological: recombinant fowlpox-prostate specific antigen vaccine Biological: recombinant vaccinia prostate-specific antigen vaccine Biological: recombinant vaccinia-B7.1 vaccine Biological:                                                                                                                                                                                                                                                                                                                                                                                                                      |                                                                                                                                                                                                | Phase 2        |     | Aug-02     | 19-Jun-13 |
| GM-CSF | NCT00047021 | Combination Chemotherapy in Treating Patients With Recurrent or Refractory Leukemia or Lymphoma                                                             | Completed | Leukemia Lymphoma                                                                                                                                                      | Biological: sargramostim Drug: cytarabine Drug: mitoxantrone hydrochloride                                                                                                                                                                                                                                                                                                                                                                                                                                                                                                                                          | Event free survival at day 14 (myeloid engraftment) Incidence of serious infections by clinical, radiologic, microbiology assessment during and after treatment                                | Phase 2        | 3   | Nov-01     | 11-Jun-10 |
| GM-CSF | NCT00050531 | High-Dose Gleevec Alone or in Combination With Peg-Intron and GM-CSF in Early Phase Chronic Myelogenous Leukemia (CML)                                      | Completed | Leukemia, Myeloid, Chronic                                                                                                                                             | Drug: Gleevec Drug: Peg-alpha interferon (Peg-Intron) Drug: Sargramostim (GM-CSF)                                                                                                                                                                                                                                                                                                                                                                                                                                                                                                                                   | Duration of Pathological Complete Response Negativity or Cytogenetic Response Number of Participants with Complete Hematologic Remission (CHR) Classification of Complete Cytogenetic Response | Phase 3        | 94  | April 2003 | 11-May-16 |
| GM-CSF | NCT00052351 | Vaccine Therapy Plus Sargramostim and Chemotherapy in Treating Women With Stage II or Stage III Breast Cancer                                               | Completed | Breast Cancer                                                                                                                                                          | Biological: recombinant fowlpox-CEA(6D)/TRICOM vaccine Biological: recombinant vaccinia-CEA(6D)-TRICOM vaccine Biological: sargramostim Drug: cyclophosphamide Drug: doxorubicin hydrochloride Drug: paclitaxel Radiation: radiation therapy                                                                                                                                                                                                                                                                                                                                                                        |                                                                                                                                                                                                | Phase 2        |     | Sep-02     | 19-Jun-13 |
| GM-CSF | NCT00053131 | Combination Chemotherapy Followed By Filgrastim or Sargramostim in Treating Patients With Relapsed or Refractory Acute Myeloid Leukemia or Acute            | Completed | Leukemia                                                                                                                                                               | Biological: filgrastim Biological: sargramostim Drug: cytarabine Drug: mitoxantrone hydrochloride                                                                                                                                                                                                                                                                                                                                                                                                                                                                                                                   |                                                                                                                                                                                                | Phase 2        |     | Jan-99     | 8-Mar-11  |
| GM-CSF | NCT00053157 | Sargramostim in Reducing Graft-Versus-Host Disease in Patients Who Are Undergoing Donor Stem Cell Transplantation for Hematologic Cancer or Aplastic Anemia | Completed | Chronic Myeloproliferative Disorders Graft Versus Host Disease Leukemia Lymphoma Myelodysplastic Syndromes Myelodysplastic/Myeloproliferative Neoplasms                | Biological: sargramostim                                                                                                                                                                                                                                                                                                                                                                                                                                                                                                                                                                                            |                                                                                                                                                                                                | Not Applicable | 10  | Jun-02     | 31-Jan-13 |
| GM-CSF | NCT00053989 | Peripheral Stem Cell Transplant in Treating Patients With Hematologic Cancer or Aplastic Anemia                                                             | Completed | Chronic Myeloproliferative Disorders Leukemia Lymphoma Multiple Myeloma and Plasma Cell Neoplasm Myelodysplastic Syndromes Myelodysplastic/Myeloproliferative Diseases | Biological: anti-thymocyte globulin Biological: graft-versus-tumor induction therapy Biological: sargramostim Biological: therapeutic allogeneic lymphocytes Drug: cyclophosphamide Drug: fludarabine phosphate Drug: methylprednisolone Drug: mycophenolate mofetil Drug: tacrolimus Procedure: allogeneic bone marrow transplantation Procedure: peripheral blood stem cell transplantation Procedure: umbilical cord blood transplantation                                                                                                                                                                       | Safety Toxicity Clinical response Overall outcome Incidence of graft-vs-tumor effect, graft-vs-host disease, and chimerism                                                                     | Phase 2        | 41  | 29-Jan-02  | 6-Sep-18  |

|        |             |                                                                                                                                                                                                                                |           |                                                                                |                                                                                                                                                                                                                                                                                                                                                                                                          |                                                                                                                                                                                                                                                                                                                                                                                                                                                                               |                 |     |            |           |
|--------|-------------|--------------------------------------------------------------------------------------------------------------------------------------------------------------------------------------------------------------------------------|-----------|--------------------------------------------------------------------------------|----------------------------------------------------------------------------------------------------------------------------------------------------------------------------------------------------------------------------------------------------------------------------------------------------------------------------------------------------------------------------------------------------------|-------------------------------------------------------------------------------------------------------------------------------------------------------------------------------------------------------------------------------------------------------------------------------------------------------------------------------------------------------------------------------------------------------------------------------------------------------------------------------|-----------------|-----|------------|-----------|
| GM-CSF | NCT00057837 | Comparison of Two Combination Chemotherapy Regimens in Treating Patients With Extensive-Stage Small Cell Lung Cancer                                                                                                           | Completed | Extensive Stage Small Cell Lung Cancer                                         | Biological: G-CSF Drug: Cisplatin Drug: Etoposide Drug: Irinotecan Drug: Topotecan                                                                                                                                                                                                                                                                                                                       | Proportion of Patients With Objective Response by Solid Tumor Response Criteria (RECIST) Duration of Response Overall Survival                                                                                                                                                                                                                                                                                                                                                | Phase 2         | 140 | Mar-04     | 13-Feb-13 |
| GM-CSF | NCT00058292 | Radiolabeled Monoclonal Antibody Therapy and High-Dose Chemotherapy Followed By Autologous Peripheral Stem Cell Transplant in Treating Patients With Relapsed or Refractory Non-                                               | Completed | Lymphoma                                                                       | Biological: filgrastim Biological: rituximab Drug: Carmustine Drug: cytarabine Drug: etoposide Drug: melphalan Procedure: peripheral blood stem cell transplantation Radiation: yttrium Y 90 ibritumomab tiuxetan                                                                                                                                                                                        | Determine the maximum tolerated dose of absorbed radiation to critical organs delivered with this combination of study treatments                                                                                                                                                                                                                                                                                                                                             | Phase 1         | 44  | April 2000 | 1-Jun-12  |
| GM-CSF | NCT00060528 | Sequential Vaccinations in Prostate Cancer Patients                                                                                                                                                                            | Completed | Prostatic Neoplasms                                                            | Drug: Recombinant Fowlpox-GM-CSF Drug: Recombinant Fowlpox-PSA (L155)-TRICOM (PROSTVAC-F/TRICOM) Drug: Recombinant Vaccinia-PSA (L155)-TRICOM (PROSTVAC-V/TRICOM) Drug: Recombinant Human GM-CSF                                                                                                                                                                                                         | Number of Participants With an Immune Response Percent of Participants With a Decrease (i.e. Greater Than or Equal to 30%) in PSA Levels Number of Participants With an Objective Response Overall Survival The Number of Participants With Adverse Events                                                                                                                                                                                                                    | Not Applicable  | 32  | 22-May-03  | 26-Oct-17 |
| GM-CSF | NCT00064129 | Ipilimumab and Sargramostim in Treating Patients With Metastatic Prostate Cancer                                                                                                                                               | Completed | Recurrent Prostate Carcinoma Stage IV Prostate Cancer                          | Biological: ipilimumab Other: Laboratory Biomarker Analysis Other: Pharmacological Study Biological: Sargramostim                                                                                                                                                                                                                                                                                        | MTD of the combination of ipilimumab with GM-CSF that results in < 33% DLT Adaptive immunity PSA and/or objective response for measurable disease Safety of the regimen Anti-idiotype antibody (human anti-human antibodies [HAHA])                                                                                                                                                                                                                                           | Phase 1         | 42  | 13-May-03  | 7-Feb-20  |
| GM-CSF | NCT00065442 | Provenge ® (Sipuleucel-T) Active Cellular Immunotherapy Treatment of Metastatic Prostate Cancer After Failing Hormone Therapy                                                                                                  | Completed | Prostate Cancer                                                                | Biological: Sipuleucel-T Biological: APC-Placebo                                                                                                                                                                                                                                                                                                                                                         | Overall Survival Time to Objective Disease Progression                                                                                                                                                                                                                                                                                                                                                                                                                        | Phase 3         | 512 | Jul-03     | 6-Sep-10  |
| GM-CSF | NCT00066365 | Inhaled Sargramostim in Treating Patients With First Pulmonary (Lung) Recurrence of Osteosarcoma                                                                                                                               | Completed | Metastatic Cancer Sarcoma                                                      | Biological: sargramostim Procedure: conventional surgery                                                                                                                                                                                                                                                                                                                                                 | Status of FAS Ligand in Pre-chemotherapy Sample Presence of FAS in Pre-chemotherapy Sample FAS Ligand in Post Chemotherapy Sample FAS Status in Post Chemotherapy Sample CD1a Status in Pre Chemotherapy Sample CD1a Status in Post Chemotherapy Sample S100 Status in Pre Chemotherapy Sample S100 Status in Post Chemotherapy Sample Clusterin Status in Pre Chemotherapy Sample Clusterin Status in Post Chemotherapy Sample Event Free Survival (EFS) Feasibility Success | Phase 2         | 49  | Jul-04     | 30-Mar-15 |
| GM-CSF | NCT00066482 | Combination Chemotherapy in Treating Children With Newly Diagnosed Malignant Germ Cell Tumors                                                                                                                                  | Completed | Childhood Germ Cell Tumor Extragenital Germ Cell Tumor                         | Biological: bleomycin sulfate Biological: filgrastim Drug: cisplatin Drug: cyclophosphamide Drug: etoposide Procedure: conventional                                                                                                                                                                                                                                                                      | Feasibility of adding cyclophosphamide to a PEB backbone Maximum tolerated dose Estimate the response rate                                                                                                                                                                                                                                                                                                                                                                    | Not Applicable  | 19  | Jul-04     | 17-Oct-13 |
| GM-CSF | NCT00066794 | S0301 Cyclosporine, Daunorubicin, and Cytarabine in Treating Older Patients With Previously Untreated Acute Myeloid Leukemia                                                                                                   | Completed | Leukemia                                                                       | Biological: filgrastim Biological: sargramostim Drug: cyclosporine Drug: cytarabine Drug: daunorubicin hydrochloride                                                                                                                                                                                                                                                                                     | Complete remission (CR)                                                                                                                                                                                                                                                                                                                                                                                                                                                       | Phase 2         | 69  | Jul-04     | 6-Mar-15  |
| GM-CSF | NCT00068393 | Doxorubicin and Gemcitabine in Treating Patients With Locally Recurrent or Metastatic Unresectable Renal Cell Carcinoma                                                                                                        | Completed | Metastatic Renal Cell Carcinoma Renal Cell Carcinoma With Sarcomatoid Features | Drug: Doxorubicin Drug: Gemcitabine Drug: G-CSF (granulocyte-colony stimulating factor) Drug: Neulasta                                                                                                                                                                                                                                                                                                   | Response Rate by Solid Tumor Response Criteria (RECIST) Overall Survival Progression-free Survival                                                                                                                                                                                                                                                                                                                                                                            | Phase 2         | 39  | Dec-03     | 10-Jan-13 |
| GM-CSF | NCT00069940 | Vaccine Therapy and Sargramostim in Treating Patients With Sarcoma or Brain Tumor                                                                                                                                              | Completed | Brain and Central Nervous System Tumors Gastrointestinal Stromal Tumor Sarcoma | Biological: sargramostim Biological: telomerase: 540-548 peptide vaccine                                                                                                                                                                                                                                                                                                                                 |                                                                                                                                                                                                                                                                                                                                                                                                                                                                               | Phase 1         |     | Dec-00     | 28-Dec-10 |
| GM-CSF | NCT00070070 | Vaccine Therapy in Treating Patients With Transitional Cell Cancer of the                                                                                                                                                      | Completed | Bladder Cancer                                                                 | Biological: BCG vaccine Biological: NY-ESO-1 peptide vaccine Biological: aldesleukin Biological: filgrastim Biological: recombinant interferon gamma Drug: carmustine Drug: cyclosporine Drug: cytarabine Drug: etoposide Drug: melphalan Procedure: autologous bone marrow transplantation Procedure: bone marrow ablation with stem cell support Procedure: peripheral blood stem cell transplantation |                                                                                                                                                                                                                                                                                                                                                                                                                                                                               | Phase 1         |     | May-03     | 22-Jul-13 |
| GM-CSF | NCT00070187 | Immunotherapy Using Cyclosporine, Interferon Gamma, and Interleukin-2 After High-Dose Myeloablative Chemotherapy With Autologous Stem Cell Transplantation in Treating Patients With Refractory or Relapsed Hodgkin's Lymphoma | Completed | Lymphoma                                                                       | Biological: aldesleukin Biological: filgrastim Biological: recombinant interferon gamma Drug: carmustine Drug: cyclosporine Drug: cytarabine Drug: etoposide Drug: melphalan Procedure: autologous bone marrow transplantation Procedure: bone marrow ablation with stem cell support Procedure: peripheral blood stem cell transplantation                                                              | Incidence of death, excluding death due to disease, during the period of time from day 0 (transplant) through day 100 post transplant                                                                                                                                                                                                                                                                                                                                         | Phase 2 Phase 3 | 24  | Nov-03     | 17-Oct-13 |
| GM-CSF | NCT00070304 | Gemcitabine and Vinorelbine in Treating Young Patients With Recurrent or Refractory Hodgkin's                                                                                                                                  | Completed | Lymphoma                                                                       | Biological: filgrastim Drug: gemcitabine hydrochloride Drug: vinorelbine tartrate                                                                                                                                                                                                                                                                                                                        | Tumor Response Rate Toxicities                                                                                                                                                                                                                                                                                                                                                                                                                                                | Phase 2         | 33  | Jul-04     | 26-Jul-13 |



|        |             |                                                                                                                                                                                                                                                   |           |                                          |                                                                                                                                                                                                                                             |                                                                                                                                                                                                                                                                                                                                                                                                                                                                                                                                                                                                                                                                                                                             |         |     |                |           |
|--------|-------------|---------------------------------------------------------------------------------------------------------------------------------------------------------------------------------------------------------------------------------------------------|-----------|------------------------------------------|---------------------------------------------------------------------------------------------------------------------------------------------------------------------------------------------------------------------------------------------|-----------------------------------------------------------------------------------------------------------------------------------------------------------------------------------------------------------------------------------------------------------------------------------------------------------------------------------------------------------------------------------------------------------------------------------------------------------------------------------------------------------------------------------------------------------------------------------------------------------------------------------------------------------------------------------------------------------------------------|---------|-----|----------------|-----------|
| GM-CSF | NCT00071955 | Vaccine Therapy and Sargramostim After Rituximab in Treating Patients With Refractory or Progressive Non-Hodgkin's Lymphoma                                                                                                                       | Completed | Lymphoma                                 | Biological: autologous immunoglobulin idiotype-KLH conjugate vaccine Biological: sargramostim                                                                                                                                               | Progression-free survival (PFS) in groups I and II and median PFS by Kaplan-Meier curves quarterly for 1 year and then twice a year after study completion Immune response rates in patients who received at least 4 immunizations by anti-idiotypic antibody and anti-KLH antibody assays during every other immunization, last immunization, 2 and 8 weeks post immunization, and then quarterly for 1 year Clinical response in patients who received at least 1 immunization in groups I and II by modified Cheson criteria post-immunization and then every 6 months for 1 year Safety at the start of immunization, every 8 weeks during immunization, 2 and 8 weeks post immunization, and then quarterly for 1 year | Phase 2 |     | Mar-03         | 19-Dec-13 |
| GM-CSF | NCT00071981 | Vaccine Therapy Using Melanoma Peptides for Cytotoxic T Cells and Helper T Cells in Treating Patients With Metastatic Melanoma                                                                                                                    | Completed | Melanoma (Skin)                          | Biological: incomplete Freund's adjuvant Biological: melanoma helper peptide vaccine Biological: multi-epitope melanoma peptide vaccine Biological: sargramostim Biological: tetanus peptide melanoma vaccine                               | Cytotoxic T-cell Lymphocytes (CTL) Response Rate Helper T-cells Response to 6MHP Helper T Cell Response to Tetanus Objective Response Rate Median Overall Survival (OS)                                                                                                                                                                                                                                                                                                                                                                                                                                                                                                                                                     | Phase 2 | 175 | Mar-05         | 28-Oct-15 |
| GM-CSF | NCT00072579 | Sargramostim in Treating Patients With Chronic Phase Chronic Myelogenous Leukemia Who Are Not in Complete Cytogenetic Remission Following Initial Treatment                                                                                       | Completed | Leukemia                                 | Biological: sargramostim                                                                                                                                                                                                                    | Cytogenetic response (complete and partial) Toxicity as assessed by the Expanded Common Toxicity Criteria v2.0 Time to progression Survival                                                                                                                                                                                                                                                                                                                                                                                                                                                                                                                                                                                 | Phase 2 |     | May-03         | 19-Jan-17 |
| GM-CSF | NCT00073931 | Iodine I 131 Tositumomab Followed by Autologous Stem Cell Transplantation in Treating Older Patients With Relapsed or Refractory Non-Hodgkin's Lymphoma                                                                                           | Completed | Lymphoma                                 | Biological: filgrastim Biological: sargramostim Procedure: autologous bone marrow transplantation Procedure: peripheral blood stem cell transplantation Radiation: tositumomab and                                                          | Disease-free survival measured continuously                                                                                                                                                                                                                                                                                                                                                                                                                                                                                                                                                                                                                                                                                 | Phase 2 | 25  | Oct-99         | 5-Feb-15  |
| GM-CSF | NCT00075829 | Stem Cell Transplantation in Individuals With Multiple Myeloma (BMT CTN 0102)                                                                                                                                                                     | Completed | Multiple Myeloma                         | Procedure: One Autologous Transplant Procedure: Non-Myeloablative Allogeneic Transplant Procedure: Second Autologous Transplant Drug: Thalidomide Drug:                                                                                     | Progression-Free Survival (PFS) Overall Survival (OS) for Standard Risk Overall Survival (OS) for High Risk Cumulative Incidence of Progression/Relapse Cumulative Incidence of Treatment Related Mortality (TRM) Interval From First to Second Transplantation Incidences of Graft Versus Host Disease (GVHD) Incidences of Chronic GVHD                                                                                                                                                                                                                                                                                                                                                                                   | Phase 2 | 710 | Dec-03         | 25-Sep-17 |
| GM-CSF | NCT00078585 | PROSTVAC® -VF/TRICOM™ Vaccine for the Treatment of Metastatic Prostate Cancer After                                                                                                                                                               | Completed | Prostate Cancer                          | Biological: PROSTVAC®-VF/TRICOM™                                                                                                                                                                                                            |                                                                                                                                                                                                                                                                                                                                                                                                                                                                                                                                                                                                                                                                                                                             | Phase 2 | 120 | Nov-03         | 11-Sep-17 |
| GM-CSF | NCT00078988 | High-Dose Chemotherapy Plus Autologous Stem Cell Transplantation Compared With Intermediate-Dose Chemotherapy Plus Autologous Stem Cell Transplantation With or Without Isotretinoin in Treating Young Patients With Recurrent High-Grade Gliomas | Completed | Brain Tumor Central Nervous System Tumor | Biological: filgrastim Drug: carboplatin Drug: etoposide Drug: isotretinoin Drug: thiotepa Procedure: autologous bone marrow transplantation Procedure: peripheral blood stem cell transplantation                                          | Event-free survival Toxic death attributable to complications of treatment in the absence of tumor progression as assessed by NCI Common Toxicity Criteria for Adverse Events (CTCAE) version 3.0 Overall survival (OS)                                                                                                                                                                                                                                                                                                                                                                                                                                                                                                     | Phase 3 | 1   | Oct-04         | 7-May-15  |
| GM-CSF | NCT00079157 | Vaccine Plus Montanide ISA-51 and Sargramostim in Treating Patients With Stage IV Breast Cancer                                                                                                                                                   | Completed | Breast Cancer                            | Biological: incomplete Freund's adjuvant Biological: sargramostim Biological: telomerase: 540-                                                                                                                                              |                                                                                                                                                                                                                                                                                                                                                                                                                                                                                                                                                                                                                                                                                                                             | Phase 1 | 28  | Feb-04         | 5-Feb-20  |
| GM-CSF | NCT00081848 | Vaccine Therapy and Radiation to Liver Metastasis in Patients With CEA-Positive Solid Tumors                                                                                                                                                      | Completed | Liver Neoplasms                          | Drug: rV-CEA(6D)/TRICOM-rF-CEA(6D)/TRICOM Drug: rF-CEA(6D)/TRICOM Drug: Recombinant Fowlpox-GM-CSF Drug: Celecoxib                                                                                                                          |                                                                                                                                                                                                                                                                                                                                                                                                                                                                                                                                                                                                                                                                                                                             | Phase 1 | 12  | April 20, 2004 | 2-Jul-17  |
| GM-CSF | NCT00083551 | UARK 98-026 TT II: Multiple Myeloma Evaluating Anti-Angiogenesis With Thalidomide and Post-Transplant Consolidation Chemotherapy                                                                                                                  | Completed | Multiple Myeloma                         | Drug: Thalidomide Drug: Ara-C Drug: BCNU Drug: Cisplatin Drug: Cyclophosphamide Drug: Dexamethasone Drug: Doxorubicin Drug: Etoposide Drug: Filgrastim Drug: Recombinant GM-CSF Drug: Interferon-alpha-2b Drug: Melphalan Drug: Vincristine | Overall Survival                                                                                                                                                                                                                                                                                                                                                                                                                                                                                                                                                                                                                                                                                                            | Phase 2 | 668 | Aug-98         | 23-Nov-15 |
| GM-CSF | NCT00083876 | D.T. PACE Versus High Dose Melphalan and Autologous Transplant in Patients With                                                                                                                                                                   | Completed | Multiple Myeloma                         | Drug: Thalidomide                                                                                                                                                                                                                           | 1.1 To evaluate, in a randomized phase III clinical trial in previously treated multiple myeloma patients whether angio-chemotherapy with D.T. PACE may be equivalent or superior to tandem transplant.                                                                                                                                                                                                                                                                                                                                                                                                                                                                                                                     | Phase 3 | 500 | Sep-98         | 2-Jul-10  |
| GM-CSF | NCT00083915 | DTPACE Followed by Tandem Transplant With Melphalan (MEL) 200 Versus MEL/Dexamethasone/Thalidomide (DT) Platinol/Adriamycin/Etoposide                                                                                                             | Completed | Multiple Myeloma                         | Drug: Cisplatin Drug: Cyclophosphamide Drug: Adriamycin Drug: Etoposide Drug: Melphalan Drug: Thalidomide Drug: Dexamethasone                                                                                                               | Transplant With DT PACE-Melphalan Regimen of Chemotherapy vs. Transplant With Melphalan Alone.                                                                                                                                                                                                                                                                                                                                                                                                                                                                                                                                                                                                                              | Phase 2 | 97  | Jun-01         | 20-Nov-17 |

|        |             |                                                                                                                                                             |           |                                                                                                                                                                                                                        |                                                                                                                                                                                                                      |                                                                                                                                                                                                                                                                                                                                                                                                                                                                                                                                                                                                                                                                                                                                                                                                                                                                                           |                 |     |           |                |
|--------|-------------|-------------------------------------------------------------------------------------------------------------------------------------------------------------|-----------|------------------------------------------------------------------------------------------------------------------------------------------------------------------------------------------------------------------------|----------------------------------------------------------------------------------------------------------------------------------------------------------------------------------------------------------------------|-------------------------------------------------------------------------------------------------------------------------------------------------------------------------------------------------------------------------------------------------------------------------------------------------------------------------------------------------------------------------------------------------------------------------------------------------------------------------------------------------------------------------------------------------------------------------------------------------------------------------------------------------------------------------------------------------------------------------------------------------------------------------------------------------------------------------------------------------------------------------------------------|-----------------|-----|-----------|----------------|
| GM-CSF | NCT00085098 | Radiation Therapy Compared With Chemotherapy and Radiation Therapy in Treating Patients With Newly Diagnosed Primary Central Nervous System (CNS) Germ Cell | Completed | Brain Tumor Central Nervous System Tumor                                                                                                                                                                               | Biological: filgrastim Drug: carboplatin Drug: cisplatin Drug: cyclophosphamide Drug: etoposide Radiation: radiation therapy                                                                                         | Event-free Survival Number of Participants With a Response to Regimen B Toxicity and Safety as Assessed by the National Cancer Institute (NCI) Common Terminology Criteria for Adverse Events (CTCAE) Version 3.0 Quality of Life (QOL) and Neurocognitive Assessment (NP)                                                                                                                                                                                                                                                                                                                                                                                                                                                                                                                                                                                                                | Phase 4         | 24  | Jan-07    | 7-Sep-18       |
| GM-CSF | NCT00085423 | Cyclophosphamide, Fludarabine, and High-Dose Interleukin-2 in Treating Patients With Metastatic Melanoma                                                    | Completed | Melanoma (Skin)                                                                                                                                                                                                        | Biological: aldesleukin Biological: sargramostim Drug: cyclophosphamide Drug: fludarabine                                                                                                                            | Number of participants with objective response as measured by RECIST Number of Participants With Lymphocyte Recovery as Measured by Blood Count Time to Progression as Measured by RECIST                                                                                                                                                                                                                                                                                                                                                                                                                                                                                                                                                                                                                                                                                                 | Phase 1         | 20  | Feb-04    | April 10, 2013 |
| GM-CSF | NCT00088413 | PANVAC-V and PANVAC-F Vaccines Plus Sargramostim to Treat Advanced Cancer                                                                                   | Completed | Adenocarcinoma Colorectal Cancer Ovarian Cancer Breast Cancer                                                                                                                                                          | Biological: PANVAC-V Biological: PANVAC-F Drug: Sargramostim (GM-CSF, Leukine)                                                                                                                                       | Number of Participants With Complete Responses (CRs), Partial Responses (PRs,) Stable Disease and Progressive Disease in the Ovarian Cancer and Breast Cancer Cohorts Percentage of Vaccines Associated With Grade 1 and Grade 2 Adverse Events Related to Vaccine in the Colorectal Cancer and Non-Colorectal Cancer Arm/Group Percentage of Participants With Grade 1 and Grade 2 Adverse Events Possibly, Likely, or Definitely Related to Vaccine in the Breast Cancer and Ovarian Cancer Cohorts Number of Participants With Adverse Events Assessed by the Common Terminology Criteria in Adverse Events (CTCAE) v3.0 and v4.0 Number of Participants With a Positive Immune Response to Carcinoembryonic Antigen (CEA) Peptide and/or Protein in the Colorectal Cancer and Non-colorectal Cancer Cohort Post Vaccination Number of Participants With a Positive Immune Response to | Phase 1 Phase 2 | 51  | 21-Jul-04 | April 2019     |
| GM-CSF | NCT00089063 | Vaccine Therapy With or Without Sargramostim in Treating Patients Who Have Undergone Surgery for Melanoma                                                   | Completed | Ciliary Body and Choroid Melanoma, Medium/Large Size Extraocular Extension Melanoma Iris Melanoma Stage IIB Melanoma Stage IIC Melanoma Stage IIIA Melanoma Stage IIIB Melanoma Stage IIIC Melanoma Stage IVC Melanoma | Biological: tyrosinase peptide Biological: gp100 antigen Biological: MART-1 antigen Biological: incomplete Freund's adjuvant Drug: Montanide ISA 51 VG Biological: sargramostim Other:                               | Immune response Disease-free survival Overall survival                                                                                                                                                                                                                                                                                                                                                                                                                                                                                                                                                                                                                                                                                                                                                                                                                                    | Phase 2         | 40  | Jun-04    | April 2015     |
| GM-CSF | NCT00089193 | Vaccine Therapy With or Without Sargramostim in Treating Patients With Stage IIB, Stage IIC, Stage III, or Stage IV Melanoma                                | Completed | Melanoma (Skin)                                                                                                                                                                                                        | Biological: incomplete Freund's adjuvant Biological: multi-epitope melanoma peptide vaccine Biological: sargramostim                                                                                                 |                                                                                                                                                                                                                                                                                                                                                                                                                                                                                                                                                                                                                                                                                                                                                                                                                                                                                           | Phase 2         |     | Sep-03    | 23-Dec-14      |
| GM-CSF | NCT00089206 | Vaccine Therapy in Treating Patients With Stage III or Stage IV Melanoma That Cannot Be Removed By                                                          | Completed | Intraocular Melanoma Melanoma (Skin)                                                                                                                                                                                   | Biological: incomplete Freund's adjuvant Biological: multi-epitope melanoma peptide vaccine Biological:                                                                                                              |                                                                                                                                                                                                                                                                                                                                                                                                                                                                                                                                                                                                                                                                                                                                                                                                                                                                                           | Phase 2         | 7   | Aug-02    | 19-Dec-14      |
| GM-CSF | NCT00089219 | Vaccine Therapy in Treating Patients With Stage IIIB, Stage IIIC, or Stage IVC Melanoma                                                                     | Completed | Intraocular Melanoma Melanoma (Skin)                                                                                                                                                                                   | Biological: IFA Biological: 6MHP Biological: GM-CSF                                                                                                                                                                  | Safety: Dose-limiting toxicity Immunogenicity Immune response in the blood DTH response Clinical outcome                                                                                                                                                                                                                                                                                                                                                                                                                                                                                                                                                                                                                                                                                                                                                                                  | Phase 1 Phase 2 | 39  | Jul-03    | 20-Nov-14      |
| GM-CSF | NCT00089258 | Biological Therapy in Treating Patients With Neuroblastoma That Has Not Responded to Previous                                                               | Completed | Neuroblastoma                                                                                                                                                                                                          | Biological: beta-glucan Biological: monoclonal antibody 3F8 Biological: sargramostim Drug: isotretinoin                                                                                                              | Disease response as assessed by PT-PC at the end of 4 courses                                                                                                                                                                                                                                                                                                                                                                                                                                                                                                                                                                                                                                                                                                                                                                                                                             | Phase 2         | 74  | Jul-04    | 17-Jan-13      |
| GM-CSF | NCT00089726 | A Cancer Vaccine (CG8123) Given With and Without Cyclophosphamide for Advanced Stage Non-Small Cell Lung Cancer (NSCLC)                                     | Completed | Lung Cancer Carcinoma, Non-Small-Cell Lung                                                                                                                                                                             | Biological: CG8123 Drug: Cyclophosphamide                                                                                                                                                                            |                                                                                                                                                                                                                                                                                                                                                                                                                                                                                                                                                                                                                                                                                                                                                                                                                                                                                           | Phase 2         | 100 | Mar-03    | 24-Dec-07      |
| GM-CSF | NCT00090493 | Study of MAGE-A3 and NY-ESO-1 Immunotherapy in Combo With DTPACE Chemo and Auto Transplantation in Multiple Myeloma                                         | Completed | Multiple Myeloma                                                                                                                                                                                                       | Biological: MAGE-A3 Biological: MAGE-A3 AND NY-ESO-1 IMMUNOTHERAPY                                                                                                                                                   | The Number of Participants Experiencing a Response to the Peptide Vaccines.                                                                                                                                                                                                                                                                                                                                                                                                                                                                                                                                                                                                                                                                                                                                                                                                               | Phase 2         | 4   | Jun-04    | 24-Jun-13      |
| GM-CSF | NCT00091039 | Vaccine Therapy, Chemotherapy, and Radiation Therapy in Treating Patients With Stage III Non-Small Cell Lung Cancer That Cannot Be Removed With Surgery     | Completed | Lung Cancer                                                                                                                                                                                                            | Biological: recombinant fowlpox GM-CSF vaccine adjuvant Biological: recombinant fowlpox-CEA(6D)/TRICOM vaccine Biological: recombinant vaccinia-CEA(6D)-TRICOM vaccine Drug: carboplatin Drug: paclitaxel Radiation: |                                                                                                                                                                                                                                                                                                                                                                                                                                                                                                                                                                                                                                                                                                                                                                                                                                                                                           | Not Applicable  |     | Aug-04    | 20-Jun-13      |
| GM-CSF | NCT00091052 | Radiation Therapy and Sargramostim in Treating Patients With Advanced Solid Tumors                                                                          | Completed | Unspecified Adult Solid Tumor, Protocol Specific                                                                                                                                                                       | Biological: sargramostim Radiation: radiation therapy                                                                                                                                                                | Toxicity as measured by the Southwest Oncology Group Performance Status and Toxicity Criteria on day 1 and in weeks 4, 12, and 20 Immune and tumor response as measured by reverse transcriptase polymerase chain reaction (RT-PCR) and CT scan on day 1 and in weeks 2, 3, 4, 12, and 20 or weeks 4, 12, and 20                                                                                                                                                                                                                                                                                                                                                                                                                                                                                                                                                                          | Phase 1 Phase 2 |     | Jul-04    | 26-Mar-13      |
| GM-CSF | NCT00091273 | Vaccine Therapy in Treating Patients With Ovarian Epithelial or Primary Peritoneal Cancer                                                                   | Completed | Ovarian Cancer Primary Peritoneal Cavity Cancer                                                                                                                                                                        | Biological: incomplete Freund's adjuvant Biological: ovarian cancer peptide vaccine Biological: sargramostim Biological: tetanus toxoid helper peptide Procedure: adjuvant therapy                                   | Safety of the Vaccine Measure of Tumor-antigen-specific Immunity in SIN by ELISpot Assay Measure of Tumor-antigen-specific Immunity in PBMC by ELISpot Assay                                                                                                                                                                                                                                                                                                                                                                                                                                                                                                                                                                                                                                                                                                                              | Phase 1         | 9   | Jun-04    | 20-Jun-14      |

|        |             |                                                                                                                                                                                                                                |           |                                                                                                                                       |                                                                                                                                                                                                                                                                                                   |                                                                                                                                                                                                                                                                                                                                                                                                                                                                                                                                                                                                                                                                                                                                                                                                                                                                                                                                                                                                                                                                                                                                                    |                 |     |          |           |
|--------|-------------|--------------------------------------------------------------------------------------------------------------------------------------------------------------------------------------------------------------------------------|-----------|---------------------------------------------------------------------------------------------------------------------------------------|---------------------------------------------------------------------------------------------------------------------------------------------------------------------------------------------------------------------------------------------------------------------------------------------------|----------------------------------------------------------------------------------------------------------------------------------------------------------------------------------------------------------------------------------------------------------------------------------------------------------------------------------------------------------------------------------------------------------------------------------------------------------------------------------------------------------------------------------------------------------------------------------------------------------------------------------------------------------------------------------------------------------------------------------------------------------------------------------------------------------------------------------------------------------------------------------------------------------------------------------------------------------------------------------------------------------------------------------------------------------------------------------------------------------------------------------------------------|-----------------|-----|----------|-----------|
| GM-CSF | NCT00093834 | Vaccine Therapy With or Without Cyclophosphamide and Doxorubicin in Women With Stage IV Breast Cancer                                                                                                                          | Completed | Breast Cancer                                                                                                                         | Biological: allogeneic breast cancer vaccine Drug: cyclophosphamide Drug: hydrochloride                                                                                                                                                                                                           | Toxicity of vaccine w/ & w/o cyclophosphamide+doxorubicin by history and phys. exam. at 28-42 days after each vaccination, 56-84 days after third vaccination, 6 months after first vaccination, and annually after first vaccination Toxicity of vaccine w/ & w/o cyclophosphamide+doxorubicin by CBC w/ differential at days 7, 14, 21, and 28-42 days after each vaccination, 56-84 days after third vaccination, 6 months after first vaccination, and annually after first vaccination Toxicity of vaccine w/ & w/o cyclophosphamide+doxorubicin by comprehensive metabolic panel at day 7 and 28-42 days after each vaccination, 56-84 days after third vaccination, 6 months after first vaccination, and annually after first vaccination Immune resp. of HER-2/neu by serum antibody titers, delayed hypersensitivity to HER-2/neu-derived peptides, and CD4+ T-cell resp. by ELISPOT at days 28-42 after each vaccination and days 56-84 after third vaccination Immune responses by immunohistochemical analysis of vaccine site biopsies at days 3 and 7 after the first and third vaccinations Time to disease progression by history | Phase 1         | 60  | Jan-04   | 20-Jul-11 |
| GM-CSF | NCT00096135 | Combination Chemotherapy and Radiation Therapy in Treating Patients With Acute Lymphoblastic Leukemia That Has Relapsed in the CNS or Testes                                                                                   | Completed | Leukemia                                                                                                                              | Biological: filgrastim Drug: cyclophosphamide Drug: cytarabine Drug: daunorubicin hydrochloride Drug: dexamethasone Drug: etoposide Drug: leucovorin calcium Drug: mercaptopurine Drug: methotrexate Drug: pegaspargase Drug: therapeutic hydrocortisone Drug: vincristine                        | Event-free Survival                                                                                                                                                                                                                                                                                                                                                                                                                                                                                                                                                                                                                                                                                                                                                                                                                                                                                                                                                                                                                                                                                                                                | Phase 2         | 168 | Nov-04   | 21-Mar-17 |
| GM-CSF | NCT00096551 | A Phase I Feasibility Study of an Intraprostatic PSA-Based Vaccine in Men With Prostate Cancer With Local Failure Following Radiotherapy or Cryotherapy or Clinical Progression on Androgen Deprivation Therapy in the Absence | Completed | Prostatic Neoplasms                                                                                                                   | Drug: Recombinant Vaccinia-PSA(L155)/TRICOM (PROSTVAC-V/TRICOM) Drug: Recombinant Fowlpox-PSA(L155)/TRICOM (PROSTVAC-F/TRICOM) Drug: Recombinant Fowlpox-GM-CSF                                                                                                                                   |                                                                                                                                                                                                                                                                                                                                                                                                                                                                                                                                                                                                                                                                                                                                                                                                                                                                                                                                                                                                                                                                                                                                                    | Phase 1         | 21  | 1-Nov-04 | 2-Jul-17  |
| GM-CSF | NCT00098774 | Rituximab and Combination Chemotherapy in Treating Patients With Newly Diagnosed Primary CNS Lymphoma                                                                                                                          | Completed | Lymphoma                                                                                                                              | Biological: filgrastim Biological: rituximab Drug: cytarabine Drug: etoposide Drug: leucovorin calcium Drug: methotrexate Drug: temozolomide                                                                                                                                                      | Complete Response Rate After Remission Induction 4 Year Progression Free Rate Change From Baseline in Mini-Mental Status Evaluation at 4 Months 4 Year Overall Survival Rate                                                                                                                                                                                                                                                                                                                                                                                                                                                                                                                                                                                                                                                                                                                                                                                                                                                                                                                                                                       | Phase 1 Phase 2 | 47  | Oct-04   | 6-Jul-16  |
| GM-CSF | NCT00101166 | Universal Granulocyte-Macrophage Colony-Stimulating Factor (GM-CSF)-Producing and CD40L Expressing Bystander Cell Line for Tumor Vaccine in Melanoma                                                                           | Completed | Melanoma (Skin)                                                                                                                       | Biological: Bystander-Based Autologous Tumor Cell Vaccine                                                                                                                                                                                                                                         | Number of Participants With Partial Response Number of Participants With Serious Adverse Events (SAEs) Related to Study Treatment Number of Participants With Stable Disease Time to Progression (TTP) in Months Overall Survival (OS) in Months                                                                                                                                                                                                                                                                                                                                                                                                                                                                                                                                                                                                                                                                                                                                                                                                                                                                                                   | Phase 1 Phase 2 | 43  | Oct-04   | 28-Feb-18 |
| GM-CSF | NCT00103142 | Vaccine Therapy in Treating Patients With Liver or Lung Metastases From Colorectal Cancer                                                                                                                                      | Completed | Colorectal Cancer Metastatic Cancer                                                                                                   | Biological: falimarev Biological: inalimarev Biological: sargramostim Biological: therapeutic                                                                                                                                                                                                     | Recurrence-free Survival at 2 Years Positive Immune Response as Measured by (Enzyme-linked Immunosorbent Spot) ELISpot Assay                                                                                                                                                                                                                                                                                                                                                                                                                                                                                                                                                                                                                                                                                                                                                                                                                                                                                                                                                                                                                       | Phase 2         | 74  | Feb-05   | 14-Oct-15 |
| GM-CSF | NCT00103662 | Mobilization of Stem Cells With AMD3100 (Plerixafor) in Multiple Myeloma Patients                                                                                                                                              | Completed | Multiple Myeloma                                                                                                                      | Drug: Granulocyte colony-stimulating factor plus plerixafor Drug: Granulocyte colony-stimulating factor plus placebo                                                                                                                                                                              | Proportion of Participants Achieving a Target of $\geq 6 \times 10^6$ CD34+ Cells/kg in 2 or Fewer Days of Apheresis. Number of Participants With Adverse Events Proportion of Participants Achieving a Target of $\geq 6 \times 10^6$ CD34+ Cells/kg in 4 or Fewer Days of Apheresis. Proportion of Participants Achieving a Target of $\geq 2 \times 10^6$ CD34+ Cells/kg in 4 or Fewer Days of Apheresis. Median Number of Days to $\geq 6 \times 10^6$ CD34+ Cells/kg Median Number of Days to Polymorphonuclear (PMN) Cell Engraftment Median Number of Days to Platelet (PLT) Engraftment Graft Durability at 100 Days Post Transplantation Graft Durability at 6 Months Post Transplantation Graft Durability at 12 Months Post Transplantation                                                                                                                                                                                                                                                                                                                                                                                             | Phase 1 Phase 2 | 302 | Jan-05   | 13-Mar-14 |
| GM-CSF | NCT00108732 | A Phase II Study of PROSTVAC-V (Vaccinia)/TRICOM and PROSTVAC-F (Fowlpox)/TRICOM With GM-CSF in Patients With PSA Progression After Local Therapy for Prostate                                                                 | Completed | Recurrent Prostate Carcinoma Stage I Prostate Cancer Stage IIA Prostate Cancer Stage IIB Prostate Cancer Stage III Prostate Cancer    | Drug: Bicalutamide Drug: Goserelin Acetate Biological: Recombinant Fowlpox-PSA(L155)/TRICOM Vaccine Biological: Recombinant Vaccinia-TRICOM Vaccine Biological: Sargramostim                                                                                                                      | Proportion of Patients Free of PSA Progression at 6 Months (Prior to the Start of Androgen Ablation) Proportion of Patients With PSA Response Difference Between Day 4 PSA Level and Day 15 PSA Level The Difference Between PSA Slopes Before and After Treatment                                                                                                                                                                                                                                                                                                                                                                                                                                                                                                                                                                                                                                                                                                                                                                                                                                                                                 | Phase 2         | 50  | Feb-06   | 30-Jun-15 |
| GM-CSF | NCT00112827 | Melphalan and Radiation Therapy Followed By Lenalidomide in Treating Patients Who Are Undergoing Autologous Stem Cell Transplant for Stage I, Stage II, or Stage III Multiple Myeloma                                          | Completed | Refractory Multiple Myeloma Smoldering Multiple Myeloma Stage I Multiple Myeloma Stage II Multiple Myeloma Stage III Multiple Myeloma | Radiation: total marrow irradiation Drug: melphalan Procedure: peripheral blood stem cell transplantation Biological: filgrastim Genetic: fluorescence in situ hybridization Genetic: cytogenetic analysis Drug: cyclophosphamide Procedure: autologous-autologous tandem hematopoietic stem cell | Feasibility Response rate Progression-free survival Overall survival Assessment of cell biology                                                                                                                                                                                                                                                                                                                                                                                                                                                                                                                                                                                                                                                                                                                                                                                                                                                                                                                                                                                                                                                    | Phase 1 Phase 2 | 54  | Nov-04   | 20-Nov-19 |
| GM-CSF | NCT00113984 | Vaccine and Antibody Treatment of Prostate Cancer                                                                                                                                                                              | Completed | Prostatic Neoplasms                                                                                                                   | Biological: PROSTVAC-V/TRICOM Biological: PROSTVAC-F/TRICOM Drug: MDX-010 Drug: Sargramostim                                                                                                                                                                                                      | To determine the safety and tolerability of a combination of a fixed dose of vaccine and anti-CTLA4, which will be dose escalated. To evaluate immunologic response (as measured by an increase in PSA specific T-cells measured by ELISPOT in HLA-A2+ patients), and clinical response (as measured by RECIST and PSA consensus criteria).                                                                                                                                                                                                                                                                                                                                                                                                                                                                                                                                                                                                                                                                                                                                                                                                        | Phase 1         | 30  | 8-Jun-05 | 16-Dec-19 |

|        |             |                                                                                                                                                                                    |           |                                                                                 |                                                                                                                                                                                                                                                                                 |                                                                                                                                                                                                                                                                                                                                                                                                                                                            |                 |     |        |           |
|--------|-------------|------------------------------------------------------------------------------------------------------------------------------------------------------------------------------------|-----------|---------------------------------------------------------------------------------|---------------------------------------------------------------------------------------------------------------------------------------------------------------------------------------------------------------------------------------------------------------------------------|------------------------------------------------------------------------------------------------------------------------------------------------------------------------------------------------------------------------------------------------------------------------------------------------------------------------------------------------------------------------------------------------------------------------------------------------------------|-----------------|-----|--------|-----------|
| GM-CSF | NCT00116441 | Vaccination in the Peripheral Stem Cell Transplant Setting for Multiple                                                                                                            | Completed | Multiple Myeloma                                                                | Biological: Therapeutic Cellular Vaccine, GM-CSF Producing                                                                                                                                                                                                                      | Multiple myeloma                                                                                                                                                                                                                                                                                                                                                                                                                                           | Phase 1 Phase   | 22  | Oct-00 | 24-Dec-07 |
| GM-CSF | NCT00116467 | Vaccination in the Peripheral Stem Cell Transplant Setting for Acute Myelogenous Leukemia                                                                                          | Completed | Acute Myelogenous Leukemia                                                      | Biological: GVAX leukemia vaccine (therapeutic cellular vaccine, GM-CSF producing)                                                                                                                                                                                              |                                                                                                                                                                                                                                                                                                                                                                                                                                                            | Phase 2         | 55  | Mar-01 | 24-Dec-07 |
| GM-CSF | NCT00117910 | Treatment for Elderly Patients With High Risk Breast Cancer                                                                                                                        | Completed | Breast Cancer                                                                   | Drug: pegfilgrastim                                                                                                                                                                                                                                                             | Provide preliminary information on the incidence of protocol defined neutropenic events in chemotherapy cycle 1. Provide preliminary information on primary and secondary prophylaxis treatment with pegfilgrastim with respect to: Incidence of protocol defined neutropenic events over all cycles Incidence of dose reductions and dose delays of planned chemotherapy due to hematological toxicity Relative dose intensity Safety profile             | Phase 3         |     | Oct-02 | 16-May-08 |
| GM-CSF | NCT00118313 | Vaccine Therapy With or Without Imiquimod in Treating Patients Who Have Undergone Surgery for Stage II, Stage III, or Stage IV Melanoma                                            | Completed | Melanoma (Skin)                                                                 | Biological: incomplete Freund's adjuvant Biological: multi-epitope melanoma peptide vaccine Biological: sargramostim Biological: tetanus toxoid helper peptide Drug: dimethyl sulfoxide Drug: imiquimod Procedure:                                                              | Safety if less than 33% of patients experience a dose-limiting at day 22 Immune response by Elispot assay at day 22                                                                                                                                                                                                                                                                                                                                        | Phase 1         |     | Nov-04 | 19-Dec-14 |
| GM-CSF | NCT00118326 | Donor Bone Marrow Transplant in Treating Young Patients With Cancer or a Non-Cancerous Disease                                                                                     | Completed | Kidney Cancer Leukemia Lymphoma Myelodysplastic Syndromes Neuroblastoma Sarcoma | Biological: filgrastim Procedure: allogeneic bone marrow transplantation                                                                                                                                                                                                        | Safety and feasibility                                                                                                                                                                                                                                                                                                                                                                                                                                     | Phase 1 Phase 2 |     | Aug-03 | 14-May-10 |
| GM-CSF | NCT00134082 | Rituximab and Cyclophosphamide Followed by Vaccine Therapy in Treating Patients With Relapsed Hodgkin Lymphoma                                                                     | Completed | Lymphoma                                                                        | Biological: KGEL vaccine Biological: Filgrastim Biological: Rituximab Drug: Cyclophosphamide                                                                                                                                                                                    | Number of Participants With Grade 3-5 Adverse Events Percentage of Participants With an Increase in Frequency of LMP2-specific CD8+ T Cells Survival Days to Neutrophil and Platelet Engraftment                                                                                                                                                                                                                                                           | Phase 2         | 31  | Nov-05 | 26-Feb-19 |
| GM-CSF | NCT00136422 | Study of Vaccination With Autologous Acute Myeloblastic Leukemia Cells in Patients With Advanced Myelodysplasia or Acute Myelogenous Leukemia                                      | Completed | Acute Myelogenous Leukemia Myelodysplasia                                       | Biological: autologous tumor cells                                                                                                                                                                                                                                              | To determine the feasibility of preparing lethally irradiated autologous myeloblastic leukemia cells engineered by adenoviral mediated gene transfer to secrete GM-CSF in patients with myelodysplastic syndromes (MDS) or AML To determine the safety and biologic activity of vaccination with lethally irradiated, autologous myeloblastic leukemia cells engineered by adenoviral mediated gene transfer to secrete GM-CSF in patients with MDS or AML | Phase 1         | 30  | Jan-00 | 10-Mar-11 |
| GM-CSF | NCT00140348 | Dose Escalation and Efficacy Trial of GVAX® Prostate Cancer Vaccine                                                                                                                | Completed | Prostate Cancer                                                                 | Biological: Immunotherapy allogeneic GM-CSF secreting cellular vaccine                                                                                                                                                                                                          |                                                                                                                                                                                                                                                                                                                                                                                                                                                            | Phase 1 Phase   | 80  | Dec-01 | 24-Dec-07 |
| GM-CSF | NCT00140374 | Vaccination Priming and Vaccine Boosting Trial of Allogeneic Human GM-CSF Gene Transduced Irradiated Prostate Cancer Cell Vaccines (GVAX® Vaccine for                              | Completed | Prostate Cancer                                                                 | Biological: Immunotherapy allogeneic GM-CSF secreting cellular vaccine                                                                                                                                                                                                          |                                                                                                                                                                                                                                                                                                                                                                                                                                                            | Phase 1 Phase 2 | 36  | Dec-98 | 1-Sep-05  |
| GM-CSF | NCT00140387 | Prime-Boost Dose Scheduling Trial for Human GM-CSF Gene Transduced Irradiated Prostate Allogeneic Cancer Cell Vaccines                                                             | Completed | Prostate Cancer                                                                 | Biological: Immunotherapy allogeneic GM-CSF secreting cellular vaccine                                                                                                                                                                                                          |                                                                                                                                                                                                                                                                                                                                                                                                                                                            | Phase 1 Phase 2 | 20  | May-99 | 1-Sep-05  |
| GM-CSF | NCT00140400 | Prime-Boost Dose Scheduling Trial for Human GM-CSF Gene Transduced Irradiated Prostate Allogeneic Cancer Vaccine (Allogeneic Prostate GVAX ® ) in Patients With Hormone-Refractory | Completed | Prostate Cancer                                                                 | Biological: Immunotherapy allogeneic GM-CSF secreting cellular vaccine                                                                                                                                                                                                          |                                                                                                                                                                                                                                                                                                                                                                                                                                                            | Phase 1 Phase 2 | 50  | May-99 | 1-Sep-05  |
| GM-CSF | NCT00165139 | Intensive Chemo-Radiotherapy With Peripheral Blood Progenitor Cell Rescue for Children With Advanced Neuroblastoma and Sarcomas                                                    | Completed | Neuroblastoma Ewings Sarcoma Non-rhabdomyosarcoma Soft Tissue Sarcoma           | Drug: Vincristine Drug: Cyclophosphamide Drug: Adriamycin Drug: Etoposide (VP-16) Drug: Cisplatin Drug: Carboplatin Drug: Melphalan Drug: Ifosfamide Drug: G-CSF (granulocyte-                                                                                                  | To determine the toxicity and feasibility of double dose chemo-radiotherapy with blood progenitor cell rescue in this patient population.                                                                                                                                                                                                                                                                                                                  | Phase 2         | 20  | Jan-96 | 2-Nov-09  |
| GM-CSF | NCT00179309 | Docetaxel Alone or in Combination With Vaccine to Treat Breast Cancer                                                                                                              | Completed | Breast Cancer                                                                   | Drug: Docetaxel Biological: PANVAC-V Biological: PANVAC-F Biological: Sargramostim                                                                                                                                                                                              | Progression-free Survival (PFS) Number of Participants With Adverse Events                                                                                                                                                                                                                                                                                                                                                                                 | Phase 2         | 48  | Sep-05 | 15-Jul-14 |
| GM-CSF | NCT00185614 | Non-myeloablative Allogeneic Transplantation for the Treatment of Multiple Myeloma                                                                                                 | Completed | Blood Cancer Multiple Myeloma                                                   | Procedure: Autologous hematopoietic cell transplant (Auto-HCT) Procedure: Allogeneic hematopoietic cell transplant (Allo-HCT) Drug: Cyclophosphamide Drug: Filgrastim Drug: Melphalan Radiation: Total body irradiation (TBI) Procedure: Cyclosporine (CSP) Drug: Mycophenolate | Event-free Survival (EFS) Relapse Rate Overall Survival (OS) Acute Graft-vs-Host-Disease (aGvHD) Chronic Graft-vs-Host-Disease (cGvHD)                                                                                                                                                                                                                                                                                                                     | Phase 2         | 63  | Aug-00 | 18-Jan-18 |
| GM-CSF | NCT00185640 | Allogeneic Transplantation Using Total Lymphoid Irradiation (TLI) and Anti-Thymocyte Globulin (ATG) for Older Patients With Hematologic                                            | Completed | Blood Cancer Leukemia                                                           | Drug: Cyclosporine Drug: Anti-Thymocyte Globulin Drug: mycophenolate mofetil Drug: Granulocyte-Colony Stimulating Factor Radiation: Total Lymphoid Irradiation                                                                                                                  | Acute Graft vs Host Disease (GvHD) Acute Graft vs Host Disease (GvHD), All Evaluable Incidence of Relapse Overall Survival (OS) Event-free Survival (EFS) Transplant-related Mortality                                                                                                                                                                                                                                                                     | Phase 2         | 303 | Mar-03 | 3-Oct-17  |

|        |             |                                                                                                                                                                                                                          |           |                                                                                                                                                                                                |                                                                                                                                                                                                                                                                                                  |                                                                                                                                                                                                                                                                                                                                                 |                 |     |            |                |
|--------|-------------|--------------------------------------------------------------------------------------------------------------------------------------------------------------------------------------------------------------------------|-----------|------------------------------------------------------------------------------------------------------------------------------------------------------------------------------------------------|--------------------------------------------------------------------------------------------------------------------------------------------------------------------------------------------------------------------------------------------------------------------------------------------------|-------------------------------------------------------------------------------------------------------------------------------------------------------------------------------------------------------------------------------------------------------------------------------------------------------------------------------------------------|-----------------|-----|------------|----------------|
| GM-CSF | NCT00185692 | Allogeneic Transplantation From Related Haploidentical Donors                                                                                                                                                            | Completed | Blood Cancer Leukemia Graft Versus Host Disease Malignancy CLL NHL Hodgkin's Disease MDS                                                                                                       | Procedure: non-myeloablative hematopoietic cell transplantation Drug: Anti-Thymocyte Globulin Drug: Cyclosporine Drug: Mycophenolate Mofetil Drug: G-CSF Drug: Solumedrol Drug: Acetaminophen Drug:                                                                                              | Engraftment of Haploidentical CD34+ Selected Blood Stem Cells in Older Patients or Those With Medical Co-morbidities Following Total Lymphoid Irradiation and Antithymocyte Globulin Transplant Conditioning Acute Graft-versus-Host Disease (GVHD) Grade 2-4 Risk From Time of Transplant Until Day 90 Post-transplant                         | Phase 2         | 16  | Aug-00     | 4-Dec-19       |
| GM-CSF | NCT00186628 | Phase 2 Trial of Prophylactic Rituximab Therapy for Prevention of CGVHD                                                                                                                                                  | Completed | Leukemia, Mast-Cell Mantle-cell Lymphoma                                                                                                                                                       | Procedure: Total lymphoid irradiation Drug: Rituximab Drug: Anti-thymoglobulin, rabbit (ATG, rabbit ATG) Drug: Cyclosporine Drug: Mycophenolate mofetil Drug: Filgrastim Drug: Granisetron Drug: Solumedrol Drug: Acetaminophen Drug: Diphenhydramine Drug: Hydrocortisone                       | Chronic Graft-vs-Host Disease (cGVHD) Incidence of Relapse Mortality Overall Survival                                                                                                                                                                                                                                                           | Phase 2         | 36  | Jun-05     | 28-Nov-17      |
| GM-CSF | NCT00204516 | Vaccination With Tumor mRNA in Metastatic Melanoma - Fixed Combination Versus Individual Selection of Targeted Antigens                                                                                                  | Completed | Malignant Melanoma                                                                                                                                                                             | Biological: mRNA coding for melanoma associated antigens Drug: GM-CSF                                                                                                                                                                                                                            | Tolerability                                                                                                                                                                                                                                                                                                                                    | Phase 1 Phase 2 | 31  | April 2007 | 16-Jan-13      |
| GM-CSF | NCT00204607 | Intradermal Vaccination With Stabilized Tumor mRNA - a Clinical Phase I/II Trial in Melanoma Patients                                                                                                                    | Completed | Malignant Melanoma                                                                                                                                                                             | Biological: mRNA Drug: GM-CSF s.c.                                                                                                                                                                                                                                                               | toxicity immune response                                                                                                                                                                                                                                                                                                                        | Phase 1 Phase 2 | 20  | Jul-04     | April 19, 2007 |
| GM-CSF | NCT00217373 | Vaccine Therapy, GM-CSF, and Interferon Alfa-2b in Treating Patients With Locally Advanced or Metastatic Cancer That Expresses Carcinoembryonic Antigen (CEA)                                                            | Completed | Adult Solid Neoplasm                                                                                                                                                                           | Biological: Recombinant Fowlpox-CEA(6D)/TRICOM Vaccine Biological: Recombinant Interferon Alfa-2b Biological: Recombinant Vaccinia-CEA(6D)-TRICOM Vaccine Biological: Sargramostim                                                                                                               | MTD of IFN-alpha-2b, defined as the dose level one level beneath that dose at which 2 or more of 6 patients showed DLT, graded according to NCI CTCAE version 4.0 Incidence of adverse events, graded according to NCI CTCAE version 4.0 Response to treatment, evaluated using the new international criteria proposed by the RECIST Committee | Phase 1         | 33  | Jun-05     | April 20, 2015 |
| GM-CSF | NCT00231309 | Granulocyte Colony Stimulating Factor (G-CSF) for Bone Marrow                                                                                                                                                            | Completed | Hematologic Diseases Hematologic Malignancies                                                                                                                                                  | Drug: Granulocyte Colony Stimulating Factor                                                                                                                                                                                                                                                      | Numbers of Participants With Disease-free Survival, Hospital Length of Stay                                                                                                                                                                                                                                                                     | Phase 1 Phase 2 | 10  | Jul-03     | 22-Aug-14      |
| GM-CSF | NCT00234169 | A Study of Peripheral Blood Progenitor Cells Mobilisation (PBPC) With VTP195183 Plus Granulocyte-Colony Stimulating Factor (G-CSF) Compared to Mobilisation With G-                                                      | Completed | Multiple Myeloma Lymphoma                                                                                                                                                                      | Drug: VTP195183                                                                                                                                                                                                                                                                                  | PB CD34+ kinetics using VTP195183 plus G-CSF The toxicity of VTP195183 pretreatment when used with G-CSF                                                                                                                                                                                                                                        | Phase 1 Phase 2 | 30  | Oct-05     | 10-May-12      |
| GM-CSF | NCT00242996 | Rituximab, Cyclophosphamide, and G-CSF Followed By Combination Chemotherapy in Treating Patients Who Are Undergoing Autologous Stem Cell Transplant Followed By Rituximab and GM-CSF for Refractory Diffuse Large B-Cell | Completed | Lymphoma                                                                                                                                                                                       | Biological: filgrastim Biological: rituximab Biological: sargramostim Drug: carmustine Drug: cyclophosphamide Drug: etoposide Procedure: adjuvant therapy Procedure: bone marrow ablation with stem cell support Procedure: peripheral blood stem cell transplantation                           | 2-year event free survival Overall survival                                                                                                                                                                                                                                                                                                     | Phase 2         | 44  | Mar-04     | 28-Sep-17      |
| GM-CSF | NCT00245037 | Busulfan, Fludarabine, and Total-Body Irradiation in Treating Patients Who Are Undergoing a Donor Stem Cell Transplant for Hematologic Cancer                                                                            | Completed | Chronic Myeloproliferative Disorders Leukemia Lymphoma Multiple Myeloma and Plasma Cell Neoplasm Myelodysplastic Syndromes Myelodysplastic/Myeloproliferative Neoplasms Precancerous Condition | Biological: therapeutic allogeneic lymphocytes Drug: busulfan Drug: cyclosporine Drug: fludarabine phosphate Drug: mycophenolate mofetil Procedure: peripheral blood stem cell transplantation Radiation: Total Body Irradiation (TBI) Drug: Granulocyte colony-stimulating factor (G-CSF) Drug: | Regimen-Related Toxicities Non-relapse Mortality Overall Survival Progression-Free Survival Relapse Mortality Acute Graft-Versus-Host Disease (aGVHD) Outcome Chronic Graft-Versus-Host Disease (cGVHD) Outcome                                                                                                                                 | Phase 1 Phase 2 | 147 | Jun-05     | 27-Sep-17      |
| GM-CSF | NCT00254592 | Neoadjuvant Treatment of Breast Cancer                                                                                                                                                                                   | Completed | Breast Cancer                                                                                                                                                                                  | Drug: Doxorubicin Drug: Cyclophosphamide Drug: Carboplatin Drug: Nab-paclitaxel Drug: GM-CSF Drug:                                                                                                                                                                                               | Overall Clinical Response to the Dose Dense Regimen                                                                                                                                                                                                                                                                                             | Phase 2         | 43  | Oct-05     | 28-Feb-19      |
| GM-CSF | NCT00256243 | Neoadjuvant Biweekly Treatment Followed by Weekly Treatment of Breast Cancer                                                                                                                                             | Completed | Breast Cancer                                                                                                                                                                                  | Drug: Doxorubicin Drug: Cyclophosphamide Drug: Paclitaxel Drug: Carboplatin Drug: GM-CSF Drug:                                                                                                                                                                                                   | Clinical Response Rate Microscopic Pathological Response Rate                                                                                                                                                                                                                                                                                   | Phase 2         | 48  | April 2004 | 2-Mar-18       |
| GM-CSF | NCT00256282 | Docetaxel and Vinorelbine Plus Sargramostim in Metastatic Malignant Melanoma                                                                                                                                             | Completed | Metastatic Melanoma                                                                                                                                                                            | Drug: Vinorelbine Drug: Docetaxel Drug: Sargramostim                                                                                                                                                                                                                                             | Progression-free Survival (PFS) in Patients With AJCC Stage IV Metastatic Melanoma Treated With Docetaxel and Vinorelbine as First-line or Post-first Line (Salvage) Systemic Therapy Percentage of Patients Alive at One Year                                                                                                                  | Phase 2         | 52  | April 2003 | 3-May-18       |
| GM-CSF | NCT00256334 | Resveratrol for Patients With Colon Cancer                                                                                                                                                                               | Completed | Colon Cancer Cancer                                                                                                                                                                            | Drug: Resveratrol                                                                                                                                                                                                                                                                                | Test the hypothesis that resveratrol modulates Wnt signaling in vivo in colon cancer and normal colonic mucosa                                                                                                                                                                                                                                  | Phase 1         | 11  | Jul-05     | 20-Jun-14      |
| GM-CSF | NCT00257322 | Cellular Immune Augmentation in Colon and Rectal Cancer                                                                                                                                                                  | Completed | Colon Cancer Rectal Cancer                                                                                                                                                                     | Drug: GM-CSF                                                                                                                                                                                                                                                                                     | Participants Exhibiting Immune Response Response Rates and Overall Survival.                                                                                                                                                                                                                                                                    | Phase 2         | 20  | April 2003 | 31-Oct-18      |
| GM-CSF | NCT00257738 | 0804 GCC: MAGE-A3/HPV 16 Vaccine for Squamous Cell Carcinoma of the Head and Neck                                                                                                                                        | Completed | Squamous Cell Carcinoma of the Head and Neck                                                                                                                                                   | Biological: MAGE-A3 Biological: HPV-16 vaccine                                                                                                                                                                                                                                                   | Number of participants experiencing toxicity Tumor response Tumor infiltrating lymphocytes                                                                                                                                                                                                                                                      | Phase 1         | 17  | Nov-05     | 17-Oct-19      |

|        |             |                                                                                                                                                                     |           |                                                                                       |                                                                                                                                                                                                                                                   |                                                                                                                                                                                                                                                                                                                                                                                                                                                                                                                                                                                                                                                                                                                                                                                                   |                |     |            |           |
|--------|-------------|---------------------------------------------------------------------------------------------------------------------------------------------------------------------|-----------|---------------------------------------------------------------------------------------|---------------------------------------------------------------------------------------------------------------------------------------------------------------------------------------------------------------------------------------------------|---------------------------------------------------------------------------------------------------------------------------------------------------------------------------------------------------------------------------------------------------------------------------------------------------------------------------------------------------------------------------------------------------------------------------------------------------------------------------------------------------------------------------------------------------------------------------------------------------------------------------------------------------------------------------------------------------------------------------------------------------------------------------------------------------|----------------|-----|------------|-----------|
| GM-CSF | NCT00262808 | GM-CSF and Combination Chemotherapy in Treating Patients Who Are Undergoing Surgery for Stage II or Stage III Colon Cancer                                          | Completed | Colorectal Cancer                                                                     | Biological: sargramostim Drug: fluorouracil Drug: leucovorin calcium Drug: oxaliplatin Procedure: adjuvant therapy Procedure: conventional                                                                                                        | Proportion of patients with a change in tumor-associated macrophage VEGF expression Disease-free and overall survival                                                                                                                                                                                                                                                                                                                                                                                                                                                                                                                                                                                                                                                                             | Phase 2        | 50  | Mar-04     | 16-Oct-13 |
| GM-CSF | NCT00266110 | Vaccine Therapy, Trastuzumab, and Vinorelbine in Treating Patients With Locally Recurrent or Metastatic Breast Cancer                                               | Completed | Breast Cancer                                                                         | Biological: sargramostim Biological: therapeutic autologous dendritic cells Biological: trastuzumab Drug: vinorelbine ditartrate                                                                                                                  | Number of Participants With Response Generation of E75/E90 Tetramer-positive CD8+ T Cells Generation of Interferon Gamma Positive CD8+T Cells                                                                                                                                                                                                                                                                                                                                                                                                                                                                                                                                                                                                                                                     | Phase 2        | 17  | Dec-05     | 12-Sep-18 |
| GM-CSF | NCT00293462 | GM-CSF Mouthwash for Preventing and Treating Mucositis in Patients Who Are Undergoing Radiation Therapy for Head and Neck Cancer                                    | Completed | Head and Neck Cancer Mucositis Radiation Toxicity                                     | Biological: sargramostim Other: oral salt and soda mouthwash                                                                                                                                                                                      | Prevention Phase (Prior to Onset of Mucositis): Compare GG and SS Prior to Onset of Mucositis to Evaluate the Incidence of Radiation Therapy-induced Oral Mucositis Treatment Phase (Begins at Onset of Mucositis): Comparison of Three Groups to Evaluate the Effectiveness of the Two Mouthwashes. Quality of Life During Radiation Therapy Functional Status by Karnofsky Performance Status Scale Pain Questionnaire                                                                                                                                                                                                                                                                                                                                                                          | Not Applicable | 91  | May-05     | 16-May-13 |
| GM-CSF | NCT00301951 | Low-Dose Fludarabine, Busulfan, and Anti-Thymocyte Globulin Followed By Donor Umbilical Cord Blood Transplant in Treating Patients With Advanced Hematologic Cancer | Completed | Leukemia Lymphoma Multiple Myeloma and Plasma Cell Neoplasm Myelodysplastic Syndromes | Biological: anti-thymocyte globulin Biological: sargramostim Drug: busulfan Drug: fludarabine phosphate Drug: mycophenolate mofetil Drug: tacrolimus Procedure: umbilical cord blood transplantation                                              | Safety and Feasibility of donor cord blood transplant                                                                                                                                                                                                                                                                                                                                                                                                                                                                                                                                                                                                                                                                                                                                             | Phase 1        | 7   | Sep-04     | 12-Oct-17 |
| GM-CSF | NCT00304018 | Donor Umbilical Cord Blood Transplant in Treating Patients With Advanced Hematologic Cancer                                                                         | Completed | Leukemia Lymphoma Multiple Myeloma and Plasma Cell Neoplasm Myelodysplastic Syndromes | Biological: anti-thymocyte globulin Biological: sargramostim Drug: busulfan Drug: etoposide Drug: fludarabine phosphate Drug: prednisone Drug: tacrolimus Procedure: allogeneic hematopoietic stem cell transplantation Procedure: umbilical cord | Determine the safety and feasibility of performing donor umbilical cord blood transplantation (UCBT) in patients with advanced hematologic malignancies                                                                                                                                                                                                                                                                                                                                                                                                                                                                                                                                                                                                                                           | Phase 1        | 5   | Oct-02     | 14-Aug-13 |
| GM-CSF | NCT00305669 | GM-CSF Before Surgery in Treating Patients With Localized Prostate Cancer                                                                                           | Completed | Prostate Cancer                                                                       | Biological: sargramostim Other: immunohistochemistry staining method Other: immunological diagnostic method Other: laboratory biomarker analysis Procedure: conventional surgery Procedure: neoadjuvant therapy                                   | Determine the safety and tolerability of daily neoadjuvant sargramostim (GM-CSF) in patients with localized prostate cancer undergoing radical prostatectomy.                                                                                                                                                                                                                                                                                                                                                                                                                                                                                                                                                                                                                                     | Phase 1        | 24  | Jul-06     | 25-Jun-14 |
| GM-CSF | NCT00309894 | Ketoconazole, Hydrocortisone, and GM-CSF in Treating Patients With Progressive Prostate Cancer After                                                                | Completed | Prostate Cancer                                                                       | Biological: sargramostim Drug: ketoconazole Drug: hydrocortisone                                                                                                                                                                                  | Time to progression Response rate as measured by prostate-specific antigen and objective parameters Frequency of grades 3-4 toxicity Pattern of immune response as measured by immunohistochemistry                                                                                                                                                                                                                                                                                                                                                                                                                                                                                                                                                                                               | Phase 2        | 49  | April 2004 | 5-Aug-19  |
| GM-CSF | NCT00322491 | Mobilization of Stem Cells With AMD3100 (Plerixafor) and G-CSF in Non-Hodgkin's Lymphoma and Multiple Myeloma Patients                                              | Completed | Lymphoma, Non-Hodgkin Multiple Myeloma                                                | Drug: G-CSF Plus Plerixafor                                                                                                                                                                                                                       | Number of Participants in Overall Safety Summary of Treatment Emergent Adverse Events (TEAE) Number of Participants Achieving a Two-Fold (Relative) Increase in Peripheral Blood (PB) CD34+ Cells/ $\mu$ L Following the First Dose of Plerixafor Number of Transplants in Which Participants Achieved Polymorphonuclear Leukocyte (PMN) Engraftment by Day 12 But No Later Than Day 21 Post Peripheral Blood Stem Cell (PBSC) Transplant                                                                                                                                                                                                                                                                                                                                                         | Phase 2        | 49  | Mar-04     | 13-Mar-14 |
| GM-CSF | NCT00322842 | Treatment With AMD3100 (Plerixafor) in Non-Hodgkin's Lymphoma and Multiple Myeloma Patients                                                                         | Completed | Lymphoma, Non-Hodgkin Multiple Myeloma                                                | Drug: G-CSF Plus Plerixafor                                                                                                                                                                                                                       | Number of Participants in Overall Safety Summary of Treatment Emergent Adverse Events (TEAE) Fold (i.e., Relative) Increase in Peripheral Blood (PB) CD34+ Cells/ $\mu$ L After First Dose of Plerixafor Number of Transplants in Which Participants Achieved Polymorphonuclear Leukocyte (PMN) Engraftment by Day 12 But No Later Than Day 21 Post Peripheral Blood Stem Cell (PBSC) Transplant Increase in Peripheral Blood (PB) CD34+ Cells From Steady-state Hematopoiesis to Pre-leukapheresis in G-CSF+Plerixafor Treated Participants Compared to Historical Controls Treated With G-CSF Alone or                                                                                                                                                                                          | Phase 2        | 35  | Sep-04     | 13-Mar-14 |
| GM-CSF | NCT00323557 | Immuno-Augmentation With GM-CSF of Pneumococcal Vaccine in Chronic Lymphocytic Leukemia Patients                                                                    | Completed | Leukemia                                                                              | Drug: Sargramostim (GM-CSF) Biological: Pneumococcal Vaccine                                                                                                                                                                                      | Number of Participants (With Increase) Immune Response to GM-CSF With a Pneumococcal Vaccine                                                                                                                                                                                                                                                                                                                                                                                                                                                                                                                                                                                                                                                                                                      | Phase 2        | 39  | Jun-04     | 5-Dec-12  |
| GM-CSF | NCT00349778 | High-Dose Sequential Therapy and Single Autologous Transplantation for Multiple Myeloma                                                                             | Completed | Multiple Myeloma                                                                      | Drug: Cyclophosphamide Drug: Etoposide Drug: Melphalan Drug: Carmustine Drug: Filgrastim                                                                                                                                                          | Number of Participants With Pulmonary Toxicity Overall Participant Survival (OS) Number of Participants That Relapse After Autologous Transplantation                                                                                                                                                                                                                                                                                                                                                                                                                                                                                                                                                                                                                                             | Phase 3        | 102 | Aug-06     | 12-Dec-17 |
| GM-CSF | NCT00350597 | GM-CSF as Adjuvant Therapy of Melanoma                                                                                                                              | Completed | Malignant Melanoma                                                                    | Drug: Granulocyte-Macrophage Colony-Stimulating Factor (GM-CSF)                                                                                                                                                                                   | 1 To describe the effect of GM-CSF adjuvant treatment of 125 ug/m2 once daily for 14 days followed by 14 days rest on immunological function as determined by serum neopterin levels (a measure of macrophage activation) and on serum levels of S100B. To evaluate if a change of any or all of the immunological parameters over the treatment period is associated with safety and/or clinical outcome as measured by time to disease recurrence, time to disseminated disease and/or survival. To perform a more detailed immunologic analysis in a sub-set of study participants (6 evaluable patients) to determine the immunologic responses induced by GM-CSF. There are three main immunological analyses to be determined: a Monocyte cell numbers and activity b Mature dendritic cell | Phase 2        | 50  | Sep-04     | 11-Jul-06 |

|        |             |                                                                                                                                                                                                      |           |                                                                                                        |                                                                                                                                                                                                                                                                                               |                                                                                                                                                                                                                                                                                                                                                                                                                                                                                                                                                                                                                                                                                                                                                                                                                                                                                                                                                                                                                                                                                                                                                                                                          |         |     |        |           |
|--------|-------------|------------------------------------------------------------------------------------------------------------------------------------------------------------------------------------------------------|-----------|--------------------------------------------------------------------------------------------------------|-----------------------------------------------------------------------------------------------------------------------------------------------------------------------------------------------------------------------------------------------------------------------------------------------|----------------------------------------------------------------------------------------------------------------------------------------------------------------------------------------------------------------------------------------------------------------------------------------------------------------------------------------------------------------------------------------------------------------------------------------------------------------------------------------------------------------------------------------------------------------------------------------------------------------------------------------------------------------------------------------------------------------------------------------------------------------------------------------------------------------------------------------------------------------------------------------------------------------------------------------------------------------------------------------------------------------------------------------------------------------------------------------------------------------------------------------------------------------------------------------------------------|---------|-----|--------|-----------|
| GM-CSF | NCT00354744 | High-Dose Combination Chemotherapy and Radiation Therapy in Treating Patients With Newly Diagnosed Metastatic Rhabdomyosarcoma or Ectomesenchymoma                                                   | Completed | Sarcoma                                                                                                | Biological: dactinomycin Drug: cyclophosphamide Drug: doxorubicin hydrochloride Drug: etoposide Drug: ifosfamide Drug: irinotecan hydrochloride Drug: vincristine sulfate Procedure: conventional surgery Radiation: radiation                                                                | Number of Patients With Complete or Partial Response Assessed by RECIST Criteria Percentage of Patients Experiencing Adverse Events Due to Concurrent Therapy Percentage of Patients Event Free at 4 Years Following Study Entry                                                                                                                                                                                                                                                                                                                                                                                                                                                                                                                                                                                                                                                                                                                                                                                                                                                                                                                                                                         | Phase 2 | 109 | Jul-06 | 29-Jan-20 |
| GM-CSF | NCT00363649 | Interferon and GM-CSF Compared With Imatinib Mesylate and Vaccine Therapy in Patients With Chronic Phase CML on a TKI                                                                                | Completed | Leukemia                                                                                               | Biological: GM-K562 cell vaccine Biological: Interferon alfa Biological: Sargramostim                                                                                                                                                                                                         | Progression-free Survival Complete Remission Rate Time to Complete Molecular Remission Disease-free Survival Early Discontinuation                                                                                                                                                                                                                                                                                                                                                                                                                                                                                                                                                                                                                                                                                                                                                                                                                                                                                                                                                                                                                                                                       | Phase 2 | 36  | Sep-06 | 13-Nov-18 |
| GM-CSF | NCT00374049 | MUC1 Vaccine in Conjunction With Poly-ICLC in Patients With Recurrent and/or Advanced Prostate Cancer                                                                                                | Completed | Prostate Cancer                                                                                        | Drug: MUC_1                                                                                                                                                                                                                                                                                   | Proportion of patients showing an immunologic response at week 8 Measures of systemic immunosuppression Dendritic cell (DC) status T cell subset analyses Clinical Response                                                                                                                                                                                                                                                                                                                                                                                                                                                                                                                                                                                                                                                                                                                                                                                                                                                                                                                                                                                                                              | Phase 1 | 14  | Jun-06 | 12-Jul-16 |
| GM-CSF | NCT00381004 | FCR Plus Sargramostim (GM-CSF) as Frontline Therapy for Symptomatic Chronic Lymphocytic Leukemia                                                                                                     | Completed | Chronic Lymphocytic Leukemia                                                                           | Drug: Cyclophosphamide Drug: Fludarabine Drug: Sargramostim Drug: Rituximab                                                                                                                                                                                                                   | Participant Overall Response Rate (ORR) at 6 Months Includes Complete Remissions, Partial Remission, or Nodule Partial Remissions. Number of Participants With Overall Response Includes Complete Remissions, Partial Remission, or Nodule Partial Remissions. Number of Participants Progression-free                                                                                                                                                                                                                                                                                                                                                                                                                                                                                                                                                                                                                                                                                                                                                                                                                                                                                                   | Phase 2 | 60  | Sep-06 | 14-Jan-16 |
| GM-CSF | NCT00383994 | Immunotherapy With NK Cell, Rituximab and Rhu-GM-CSF in Non-Myeloablative Allogeneic Stem Cell                                                                                                       | Completed | Lymphoma Leukemia Transplantation, Stem Cell Lymphoid Malignancies Disorder Related to                 | Drug: GM-CSF Drug: Rituximab Biological: NK Cell Infusion                                                                                                                                                                                                                                     | Dose-limiting toxicities (DLTs) for NK cells infusions after non-myeloablative transplantation for lymphoid malignancies                                                                                                                                                                                                                                                                                                                                                                                                                                                                                                                                                                                                                                                                                                                                                                                                                                                                                                                                                                                                                                                                                 | Phase 1 | 6   | Sep-06 | 31-Jul-19 |
| GM-CSF | NCT00389818 | Combination Chemotherapy and Rituximab in Treating Patients With Newly Diagnosed AIDS-Related B-Cell Non-Hodgkin's Lymphoma                                                                          | Completed | Lymphoma                                                                                               | Biological: filgrastim Biological: pegfilgrastim Biological: rituximab Biological: sargramostim Drug: cyclophosphamide Drug: pegylated liposomal doxorubicin hydrochloride Drug: prednisone Drug: vincristine sulfate Other: immunohistochemistry staining method Other: laboratory biomarker | Complete Response Rate (Complete Response and Complete Response Unconfirmed) Defined as Disappearance of All Evidence of Disease Based on Radiographic Findings on CT or MRI . Duration of Response Median Survival Time Rate of Bacterial, Fungal, and Opportunistic Infections Relationship Between MDR-1 Expression and Response to Treatment Relationship Between Response and Survival and BCL-2 Expression in Tumor Tissue Relationship Between Development of Bacterial, Fungal, and/or Opportunistic Infections and Baseline CD4 Lymphocyte Count, HIV-1 RNA Level, and Quantitative Immunoglobulin Level, or Changes in Quantitative Immunoglobulin Levels Over Time Mortality                                                                                                                                                                                                                                                                                                                                                                                                                                                                                                                  | Phase 1 | 43  | Jan-07 | 6-Jun-18  |
| GM-CSF | NCT00396201 | AMD3100 (Plerixafor) Added to a Mobilizing Regimen of Granulocyte-colony Stimulating Factor (G-CSF) to Increase the Number of Peripheral Blood Stem Cells (PBSCs) in Patients With Hodgkin's Disease | Completed | Hodgkin's Disease                                                                                      | Drug: G-CSF Plus Plerixafor                                                                                                                                                                                                                                                                   | Proportion of Participants Who Achieved $\geq 5 \times 10^6$ CD34+ Cells/kg Following Treatment With Plerixafor and G-CSF Overall Participant Counts of Adverse Events During the Treatment Period Proportion of Participants Who Achieved $\geq 2 \times 10^6$ CD34+ Cells/kg Following Treatment With Plerixafor and G-CSF Fold (Relative) Increase in Peripheral Blood (PB) CD34+ Cells/ $\mu$ L Participant Counts Grouped by Number of Apheresis Days Required to Collect $\geq 5 \times 10^6$ CD34+ Cells/kg Number of Days Post-Transplantation to Polymorphonuclear Leukocyte (PMN) Engraftment Number of Days Post Transplantation to Platelet (PLT) Engraftment Number of Participants With a Durable Graft at 12 Months Maximum Plasma Concentration (Cmax) Following a Single Dose of Plerixafor Time to Maximum Plasma Concentration (Tmax) Following a Single Dose of Plerixafor Half-life (T1/2) Following a Single Dose of Plerixafor Area Under the Plasma Concentration-time Curve From 0 to 10 Hours (AUC0-10) Following a Single Dose of Plerixafor Apparent Clearance (CL/F) of Single-dose Plerixafor Apparent Volume of Distribution (Vz/F) Following a Single-dose of Plerixafor | Phase 2 | 22  | Nov-04 | 13-Mar-14 |
| GM-CSF | NCT00396266 | AMD3100 (Plerixafor) Given to NHL and MM Patients to Increase the Number of PBSCs When Given a Mobilizing Regimen of G-CSF                                                                           | Completed | Multiple Myeloma Lymphoma, Non-Hodgkin                                                                 | Drug: G-CSF Plus Plerixafor                                                                                                                                                                                                                                                                   | Number of Participants in Overall Safety Summary of Treatment Emergent Adverse Events (TEAE) Number of Participants Who Had a $\geq 2$ -fold Increase in Circulating CD34+ Cells Number of Transplants Resulting In Polymorphonuclear Leukocyte (PMN) Engraftment by Day 12 But No Later Than Day 21 Post-Transplant Tumor Cell Mobilization in Non-Hodgkin's Lymphoma (NHL) Participants Following Plerixafor Treatment Single-dose Maximum Observed Concentration of Plerixafor (Cmax) Single-dose Time to Maximum Concentration of Plerixafor (Tmax) Single-dose Half-life of Plerixafor (T1/2) Single-dose Area Under the Concentration-time Curve of Plerixafor From Time 0 to 10 Hours Post-dose (AUC0-10) Single-dose Apparent Clearance of Plerixafor (CL/F) Single-dose Apparent Volume of Distribution of Plerixafor (Vz/F) in NHL and MM Patients Maximum Fold Increase in Peripheral Blood CD34+ Cells From Baseline Following Initial Administration of Plerixafor                                                                                                                                                                                                                          | Phase 2 | 22  | Jan-05 | 7-Mar-14  |
| GM-CSF | NCT00398138 | Vaccine Therapy and GM-CSF in Treating Patients With Acute Myeloid Leukemia, Myelodysplastic Syndromes, Non-Small Cell Lung Cancer, or Mesothelioma                                                  | Completed | Leukemia Lung Cancer Malignant Mesothelioma Myelodysplastic Syndromes Primary Peritoneal Cavity Cancer | Biological: WT-1 analog peptide vaccine Biological: incomplete Freund's adjuvant Biological: sargramostim Genetic: polymerase chain reaction Other: flow cytometry Other: immunoenzyme technique                                                                                              | Safety Immune Response                                                                                                                                                                                                                                                                                                                                                                                                                                                                                                                                                                                                                                                                                                                                                                                                                                                                                                                                                                                                                                                                                                                                                                                   | Phase 1 | 22  | Oct-06 | 2-Mar-16  |

|        |             |                                                                                                                                                                                        |           |                                                                                                                            |                                                                                                                                                                                                                                                                                                                                 |                                                                                                                                                                                                                                                                                                                                                                                                                          |                 |      |          |                |
|--------|-------------|----------------------------------------------------------------------------------------------------------------------------------------------------------------------------------------|-----------|----------------------------------------------------------------------------------------------------------------------------|---------------------------------------------------------------------------------------------------------------------------------------------------------------------------------------------------------------------------------------------------------------------------------------------------------------------------------|--------------------------------------------------------------------------------------------------------------------------------------------------------------------------------------------------------------------------------------------------------------------------------------------------------------------------------------------------------------------------------------------------------------------------|-----------------|------|----------|----------------|
| GM-CSF | NCT00399529 | Trastuzumab, Cyclophosphamide, and an Allogeneic GM-CSF-secreting Breast Tumor Vaccine for the Treatment of HER-2/Neu-Overexpressing Metastatic Breast                                 | Completed | Breast Neoplasms                                                                                                           | Biological: Allogeneic GM-CSF-secreting breast cancer vaccine Drug: Trastuzumab Drug: Cyclophosphamide                                                                                                                                                                                                                          | Safety will be evaluated by assessing toxicity related to the vaccine, CY, Trastuzumab, cardiac dysfunction, and the potential induction of autoimmunity. Clinical benefit will be assessed by re-evaluating disease status with tumor markers and RECIST criteria, or with full evaluation upon the development of new symptoms. Immunological response                                                                 | Phase 2         | 22   | Sep-06   | 13-Dec-12      |
| GM-CSF | NCT00400517 | GM-CSF and Thalidomide in Treating Patients Undergoing Surgery for High-Risk Prostate Cancer                                                                                           | Completed | Prostate Cancer                                                                                                            | Biological: sargramostim Drug: thalidomide Procedure: conventional surgery Procedure: neoadjuvant therapy                                                                                                                                                                                                                       | Proportion of Patients P0 at Surgery Proportion of Patients With Negative Surgical Margins Prostate-specific Antigen Response Time to Clinical Progression                                                                                                                                                                                                                                                               | Phase 2         | 28   | Mar-03   | 28-Aug-18      |
| GM-CSF | NCT00402025 | Talimogene Laherparepvec in Patients With Unresectable Pancreatic Cancer                                                                                                               | Completed | Pancreatic Cancer                                                                                                          | Biological: Talimogene Laherparepvec                                                                                                                                                                                                                                                                                            | Number of Participants With Adverse Events Number of Participants With Talimogene Laherparepvec Detected in Blood and Urine Number of Participants Positive for Anti-herpes Simplex Virus-1 (HSV-1) Antibodies Change From Baseline in Sum of Longest Diameters of Injected Tumors Number of Participants With Overall Objective                                                                                         | Phase 1         | 17   | Nov-06   | April 15, 2016 |
| GM-CSF | NCT00404066 | Phase 2 Neoadjuvant Doxorubicin and Cyclophosphamide -> Docetaxel With Lapatinib in Stage II/III Her2Neu+ Breast Cancer                                                                | Completed | Breast Cancer Metastatic Breast Cancer                                                                                     | Drug: Lapatinib Drug: Doxorubicin Drug: Cyclophosphamide Drug: Docetaxel Drug: Pegfilgrastim Drug: Filgrastim Drug: Dexamethasone Drug: Trastuzumab                                                                                                                                                                             | Percentage of Participants With Pathologic Complete Response (pCR) Disease-free Survival (DFS)                                                                                                                                                                                                                                                                                                                           | Phase 2         | 21   | Oct-06   | 22-Dec-17      |
| GM-CSF | NCT00411086 | Rituximab and GM-CSF in Treating Patients With Newly Diagnosed Follicular B-Cell Lymphoma                                                                                              | Completed | Lymphoma                                                                                                                   | Biological: Rituximab Biological: Sargramostim (GM-CSF)                                                                                                                                                                                                                                                                         | Complete Response Rate Median Progression-Free Survival (PFS) Overall Response (OR) Rate                                                                                                                                                                                                                                                                                                                                 | Phase 1 Phase 2 | 60   | Nov-06   | 5-Dec-17       |
| GM-CSF | NCT00425360 | Gemcitabine and Capecitabine With or Without Vaccine Therapy in Treating Patients With Locally Advanced or Metastatic Pancreatic Cancer                                                | Completed | Pancreatic Cancer                                                                                                          | Biological: sargramostim Biological: telomerase peptide vaccine GV1001 Drug: capecitabine Drug: gemcitabine hydrochloride                                                                                                                                                                                                       | Survival at 1 year Time to progression Quality of life as assessed by the European Organization for Research and Treatment of Cancer (EORTC)-Quality of Life (QLQ) C30 questionnaire and the European Study group for Pancreatic Cancer-QLQ questionnaire Clinical benefit response Objective response rate as assessed by RECIST criteria Toxicity as assessed by NCI CTCAE version 3 Survival and response as assessed | Phase 3         | 1110 | Sep-06   | 26-Aug-13      |
| GM-CSF | NCT00425477 | Bexarotene and GM-CSF in Treating Patients With Myelodysplastic Syndrome or Acute Myeloid Leukemia                                                                                     | Completed | Leukemia Myelodysplastic Syndromes Myelodysplastic/Myeloproliferative Diseases                                             | Biological: sargramostim Drug: bexarotene Genetic: cytogenetic analysis Genetic: fluorescence in situ hybridization Other: flow cytometry Other: laboratory biomarker analysis Procedure:                                                                                                                                       | Clinical Response (Complete and Partial) Clinical Activity as Measured by Change in Peripheral Blood Counts and Changes in Transfusion Requirements Biological Activity as Measured by in Vivo Induction of Terminal Differentiation of Myeloid Progenitors and in Vivo Changes in Detectable Chromosomal Abnormalities                                                                                                  | Phase 2         | 26   | Nov-06   | 5-Oct-18       |
| GM-CSF | NCT00426205 | GM-CSF Vaccinations After Allogeneic Blood Stem Cell Transplantation in Patients With Advanced Myeloid Malignancies                                                                    | Completed | Myelodysplastic Syndrome RAEB-I or RAEB-II Refractory Acute Myeloid Leukemia Refractory CML Myeloid Blast Crisis           | Biological: GM-CSF secreting leukemia vaccine                                                                                                                                                                                                                                                                                   | Feasibility as measured by ability to generate sufficient vaccine, and ability for this patient population to initiate vaccination between day 30 to day 45 after transplant. Safety of GVAX vaccination as measured by grade III-IV acute GVHD, and CTC grade 3 or higher non-hematologic toxicity biologic activity of GVAX vaccination disease free and overall survival.                                             | Not Applicable  | 24   | Jun-04   | 4-Mar-14       |
| GM-CSF | NCT00429104 | Herceptin and GM-CSF for Metastatic Breast Cancer                                                                                                                                      | Completed | Breast Cancer                                                                                                              | Drug: Herceptin Drug: GM-CSF                                                                                                                                                                                                                                                                                                    | Number of Participants With Tumor Response (Stable Disease) Duration of Stable Disease                                                                                                                                                                                                                                                                                                                                   | Phase 2         | 18   | Aug-02   | 6-Dec-12       |
| GM-CSF | NCT00429312 | A Study of Recombinant Vaccinia Virus to Treat Malignant Melanoma                                                                                                                      | Completed | Melanoma                                                                                                                   | Biological: JX-594                                                                                                                                                                                                                                                                                                              | Response rate for injected tumor(s) Safety, as determined by incidence of treatment-related adverse events, serious adverse events (SAEs), and clinically-significant changes from baseline in routine laboratory parameters Best overall response for entire disease burden (RECIST criteria) Progression-free survival (PFS) Response rate of non-injected                                                             | Phase 1 Phase 2 | 10   | Mar-07   | 15-Jan-15      |
| GM-CSF | NCT00429416 | Research Study to Determine if an Experimental Agent, LLME Can Decrease the Incidence and Severity of Graft-Versus-Host-Disease (GVHD) Following Blood (Hematopoietic) Stem Cell       | Completed | Hematologic Malignancies                                                                                                   | Drug: L-leucyl-L-leucine Methyl Ester (LLME) Drug: Fludarabine Drug: Cytarabine Drug: Cyclophosphamide Drug: Tacrolimus Drug: Mesna Biological: Granulocyte Macrophage Colony-Stimulating Factor (GM-CSF) Procedure:                                                                                                            | Safety of CD34+ Stem Cell Infusions Followed by LLME as Measured by 100-Day Mortality Rate of Engraftment of Non-Myeloablative Transplants Incidence of Grade II-IV Acute Graft-Versus-Host-Disease (GVHD) Rate of Serious Infectious Complications Number of Patients Who Achieve a CD4 Count > 200/Micro-liters                                                                                                        | Phase 2         | 14   | Mar-04   | 29-Nov-16      |
| GM-CSF | NCT00433745 | Wilm's Tumor 1 (WT1) Peptide Vaccine for High Risk Hematologic                                                                                                                         | Completed | Myelodysplastic Syndrome Acute Myeloid Leukemia (AML) Chronic Myeloid Leukemia (CML)                                       | Drug: WT1 Peptide Vaccine                                                                                                                                                                                                                                                                                                       | Cellular Immune Response Disease Response                                                                                                                                                                                                                                                                                                                                                                                | Phase 3         | 4    | Feb-07   | 8-Jul-14       |
| GM-CSF | NCT00436930 | Vaccine Therapy and GM-CSF in Treating Patients With Recurrent or Metastatic Melanoma                                                                                                  | Completed | Melanoma (Skin)                                                                                                            | Biological: autologous tumor cell vaccine Biological: sargramostim Biological: therapeutic autologous dendritic cells                                                                                                                                                                                                           | Overall survival, progression-free survival, event-free survival, and failure-free survival Frequency of immune response as measured by delayed-type hypersensitivity and serologic and cellular assays at baseline and during and after completion of study                                                                                                                                                             | Phase 2         | 200  | Dec-06   | 10-Jan-14      |
| GM-CSF | NCT00437502 | A Phase I Study of Ovarian Cancer Peptides Plus GM-CSF and Adjuvant With Ovarian, Tubal or Peritoneal                                                                                  | Completed | Epithelial Ovarian, Tubal or Peritoneal Cancer                                                                             | Biological: tumor peptide vaccine                                                                                                                                                                                                                                                                                               | Date of first objective finding will be used to define the date of relapse                                                                                                                                                                                                                                                                                                                                               | Phase 1         | 8    | Mar-07   | 19-Nov-12      |
| GM-CSF | NCT00448201 | Reduced-Intensity Busulfan and Fludarabine With or Without Antithymocyte Globulin Followed by Donor Stem Cell Transplant in Treating Patients With Hematologic Cancer or Other Disease | Completed | Chronic Myeloproliferative Disorders Leukemia Lymphoma Multiple Myeloma and Plasma Cell Neoplasm Myelodysplastic Syndromes | Biological: anti-thymocyte globulin Biological: sargramostim Biological: therapeutic allogeneic lymphocytes Drug: busulfan Drug: fludarabine phosphate Drug: methotrexate Drug: tacrolimus Procedure: nonmyeloablative allogeneic hematopoietic stem cell transplantation Procedure: peripheral blood stem cell transplantation | Treatment-related Mortality Complete Response at 6 and 12 Months Post-transplant Complete or Mixed Donor Chimerism at 30, 60, and 90 Days Post-transplant 5-year Disease-free Survival Graft-vs-host Disease at 6 Months Post-transplant                                                                                                                                                                                 | Phase 3         | 71   | 7-Jan-11 | 30-May-17      |



|        |             |                                                                                                                                                         |           |                                                                                                                                                                                                                                                                                                                                                                                                                                                                                                                                                                                                                                                                                                                                                                                                                                                                                                                                                                                                                                                                                                                              |                                                                                                                                                    |                                                                                                                                                                                                                                                                                                                                                                                                                                                                                                                                                                                                       |         |    |            |           |
|--------|-------------|---------------------------------------------------------------------------------------------------------------------------------------------------------|-----------|------------------------------------------------------------------------------------------------------------------------------------------------------------------------------------------------------------------------------------------------------------------------------------------------------------------------------------------------------------------------------------------------------------------------------------------------------------------------------------------------------------------------------------------------------------------------------------------------------------------------------------------------------------------------------------------------------------------------------------------------------------------------------------------------------------------------------------------------------------------------------------------------------------------------------------------------------------------------------------------------------------------------------------------------------------------------------------------------------------------------------|----------------------------------------------------------------------------------------------------------------------------------------------------|-------------------------------------------------------------------------------------------------------------------------------------------------------------------------------------------------------------------------------------------------------------------------------------------------------------------------------------------------------------------------------------------------------------------------------------------------------------------------------------------------------------------------------------------------------------------------------------------------------|---------|----|------------|-----------|
| GM-CSF | NCT00448409 | Activity of TroVax® Alone vs. TroVax® Plus GM-CSF in Patients With Prostate Cancer                                                                      | Completed | Prostatic Neoplasms                                                                                                                                                                                                                                                                                                                                                                                                                                                                                                                                                                                                                                                                                                                                                                                                                                                                                                                                                                                                                                                                                                          | Biological: TroVax Drug: GM-CSF                                                                                                                    | PSA response rate to TroVax® and TroVax® in combination with GM-CSF Anti-5T4 antibody levels CD8+ve cellular response to 5T4 antigen as measured by Elispot Assessment of the number of adverse events and serious adverse events in both groups Objective response rate Overall survival of the patients Progression-free                                                                                                                                                                                                                                                                            | Phase 2 | 27 | May-06     | 17-Mar-16 |
| GM-CSF | NCT00450307 | Monoclonal Antibody 3F8 and GM-CSF in Treating Young Patients With High-Risk, Refractory or Relapsed                                                    | Completed | Neuroblastoma                                                                                                                                                                                                                                                                                                                                                                                                                                                                                                                                                                                                                                                                                                                                                                                                                                                                                                                                                                                                                                                                                                                | Biological: monoclonal antibody 3F8 Biological: sargramostim                                                                                       | Maximum tolerated dose of monoclonal antibody 3F8 Anti-neuroblastoma effects of monoclonal antibody 3F8 and sargramostim (GM-CSF)                                                                                                                                                                                                                                                                                                                                                                                                                                                                     | Phase 1 | 32 | Jun-05     | 16-Oct-13 |
| GM-CSF | NCT00450463 | Vaccine Therapy With PROSTVAC/TRICOM and Flutamide Versus Flutamide Alone to Treat Prostate Cancer                                                      | Completed | Prostate Cancer                                                                                                                                                                                                                                                                                                                                                                                                                                                                                                                                                                                                                                                                                                                                                                                                                                                                                                                                                                                                                                                                                                              | Drug: Sargramostim (GM-CSF, Leukine) Drug: Flutamide (Eulexin) Biological: PROSTVAC-F/TRICOM Biological: PROSTVAC-                                 | Time to Treatment Failure Count of Participants With Serious and Non-serious Adverse Events Assessed by the Common Terminology Criteria in Adverse Events (CTCAE v4.0) Number of Participants With Prostatic Specific Antigen (PSA) Response Percentage of Participants With Antigen Specific Immune Responses Against Prostatic Specific                                                                                                                                                                                                                                                             | Phase 2 | 64 | 23-Feb-07  | 29-Nov-18 |
| GM-CSF | NCT00455221 | Safety Assessment of a Muropeptide-gene Vaccine in CML                                                                                                  | Completed | Leukemia, Myeloid, Chronic                                                                                                                                                                                                                                                                                                                                                                                                                                                                                                                                                                                                                                                                                                                                                                                                                                                                                                                                                                                                                                                                                                   | Biological: Bcr-abl muropeptide vaccine Genetic: Cytokine gene adjuvant                                                                            | To assess safety of bcr-abl peptide vaccination in Ph+ or MRD CML patients To measure the development of a molecular response to vaccination as measured by 1 log decrease in qRT-PCR BCR-ABL levels for at least 3 months; To measure the development of immune response following vaccination                                                                                                                                                                                                                                                                                                       | Phase 1 | 12 | Feb-08     | 4-Jun-12  |
| GM-CSF | NCT00458250 | Feasibility of Haploidentical Hematopoietic Stem Cell Transplantation Using CAMPATH-1H                                                                  | Completed | Leukemia, Myeloid, Acute Leukemia, Lymphoblastic, Acute                                                                                                                                                                                                                                                                                                                                                                                                                                                                                                                                                                                                                                                                                                                                                                                                                                                                                                                                                                                                                                                                      | Procedure: Haploidentical hematopoietic stem cell transplantation Drug: Busulfan Drug: Cyclophosphamide Drug: CAMPATH-1H Drug: Cyclosporin A Drug: | Engraftment one month after transplantation six months survival                                                                                                                                                                                                                                                                                                                                                                                                                                                                                                                                       | Phase 1 | 10 | Sep-06     | 18-Nov-08 |
| GM-CSF | NCT00458601 | Phase II Study of Rindopepimut (CDX-110) in Patients With Glioblastoma Multiforme                                                                       | Completed | Malignant Glioma                                                                                                                                                                                                                                                                                                                                                                                                                                                                                                                                                                                                                                                                                                                                                                                                                                                                                                                                                                                                                                                                                                             | Drug: CDX-110 with GM-CSF Drug: Temozolomide                                                                                                       | Progression-free survival status Safety and tolerability characterized by adverse events (term, grade, frequency). Safety and tolerability characterized by physical examinations. Safety and tolerability characterized by hematologic and metabolic panel (including CBC with differential, electrolytes, BUN, Cr, liver associated enzymes). Safety and tolerability characterized by urinalysis. Safety and tolerability characterized by vital signs. Immune response; T-cell response to vaccine. Immune response; antibody response to vaccine. Immune response; HLA typing. Overall survival. | Phase 2 | 82 | Aug-07     | 16-Jan-18 |
| GM-CSF | NCT00459069 | The Use of Dendritic Cell/Tumor Fusions as a Novel Tumor Vaccine in Patients With Multiple Myeloma                                                      | Completed | Multiple Myeloma                                                                                                                                                                                                                                                                                                                                                                                                                                                                                                                                                                                                                                                                                                                                                                                                                                                                                                                                                                                                                                                                                                             | Biological: Dendritic Cell Tumor Fusion Vaccine                                                                                                    | To assess the toxicity associated with vaccination of patients multiple myeloma with dendritic cell(DC)/tumor cell fusions co-administered with GM-CSF. To determine whether evidence of tumor specific cellular and humoral immunity can be induced by serial vaccination with DC/tumor cell fusion cells co-administered with GMCSF to determine if vaccination with DC/tumor cell fusions co-administered with GM-CSF results in clinical                                                                                                                                                          | Phase 1 | 18 | Jul-04     | 12-Jan-10 |
| GM-CSF | NCT00462358 | A Study of ARRY-520 in Patients With Advanced Cancer                                                                                                    | Completed | Advanced Solid Tumors                                                                                                                                                                                                                                                                                                                                                                                                                                                                                                                                                                                                                                                                                                                                                                                                                                                                                                                                                                                                                                                                                                        | Drug: ARRY-520, KSP(Eg5) inhibitor; intravenous Drug: Filgrastim, granulocyte-colony stimulating factor (G-CSF); subcutaneous                      | Establish the maximum tolerated dose (MTD) of study drug, with and without G-CSF. Characterize the safety profile of the study drug in terms of adverse events, clinical laboratory tests and electrocardiograms. Characterize the pharmacokinetics of the study drug. Assess the efficacy of the study drug in terms of tumor response.                                                                                                                                                                                                                                                              | Phase 1 | 41 | April 2007 | 3-Oct-11  |
| GM-CSF | NCT00462605 | MS-275 and GM-CSF in Treating Patients With Myelodysplastic Syndrome and/or Relapsed or Refractory Acute Myeloid Leukemia or Acute Lymphocytic Leukemia | Completed | Adult Acute Lymphoblastic Leukemia in Remission Adult Acute Megakaryoblastic Leukemia (M7) Adult Acute Minimally Differentiated Myeloid Leukemia (M0) Adult Acute Monoblastic Leukemia (M5a) Adult Acute Monocytic Leukemia (M5b) Adult Acute Myeloblastic Leukemia With Maturation (M2) Adult Acute Myeloblastic Leukemia Without Maturation (M1) Adult Acute Myeloid Leukemia With 11q23 (MLL) Abnormalities Adult Acute Myeloid Leukemia With Inv(16)(p13;q22) Adult Acute Myeloid Leukemia With t(16;16)(p13;q22) Adult Acute Myeloid Leukemia With t(8;21)(q22;q22) Adult Acute Myelomonocytic Leukemia (M4) Adult Erythroleukemia (M6a) Adult Pure Erythroid Leukemia (M6b) Chronic Myelomonocytic Leukemia de Novo Myelodysplastic Syndromes Myelodysplastic/Myeloproliferative Neoplasm, Unclassifiable Previously Treated Myelodysplastic Syndromes Recurrent Adult Acute Lymphoblastic Leukemia Recurrent Adult Acute Myeloid Leukemia Refractory Anemia Refractory Anemia With Excess Blasts Refractory Anemia With Ringed Sideroblasts Refractory Cytopenia With Multi-lineage Dysplasia Secondary Acute Myeloid | Drug: entinostat Drug: sargramostim                                                                                                                | Response (Complete and Partial Response) in Patients With Myeloid Disorders Clinical Activity Assessed by Change in Peripheral Blood Counts Clinical Activity Assessed by Change in Transfusion Requirements Changes in Detectable Chromosomal Abnormalities Measured by Fluorescent in Situ Hybridization (FISH) Change in the Percentage of Cells With Normal and Abnormal Myeloid Phenotype Measured by Flow Cytometry                                                                                                                                                                             | Phase 2 | 24 | April 2007 | 18-Jul-17 |
| GM-CSF | NCT00466726 | Vaccine Therapy in Treating Patients With Philadelphia Chromosome-Positive Chronic Myelogenous Leukemia                                                 | Completed | Leukemia                                                                                                                                                                                                                                                                                                                                                                                                                                                                                                                                                                                                                                                                                                                                                                                                                                                                                                                                                                                                                                                                                                                     | Biological: bcr-abl p210-b3a2 breakpoint-derived muropeptide vaccine Biological: sargramostim                                                      | Number of Patients Showing a Reduction by at Least 50% of Peripheral Blood BCR-ABL/ABL Ratio Compared to the Individual Prevacine Level Number of Patients With Undetectable Transcript at Any Time After Immunization Number of Patients With Peptide-specific Immune Response Induced by the Vaccinations                                                                                                                                                                                                                                                                                           | Phase 2 | 57 | Mar-07     | 28-Aug-18 |

|        |             |                                                                                                                                                                                                                              |           |                                                                                                                                                                                                                                                                                                                                                                                                                                                                                                                                                                                                |                                                                                                                                                                                                       |                                                                                                                                                                                                                                                                                                                                                                                                                                                                                                                                                                                                                                                                                                |                 |     |            |           |
|--------|-------------|------------------------------------------------------------------------------------------------------------------------------------------------------------------------------------------------------------------------------|-----------|------------------------------------------------------------------------------------------------------------------------------------------------------------------------------------------------------------------------------------------------------------------------------------------------------------------------------------------------------------------------------------------------------------------------------------------------------------------------------------------------------------------------------------------------------------------------------------------------|-------------------------------------------------------------------------------------------------------------------------------------------------------------------------------------------------------|------------------------------------------------------------------------------------------------------------------------------------------------------------------------------------------------------------------------------------------------------------------------------------------------------------------------------------------------------------------------------------------------------------------------------------------------------------------------------------------------------------------------------------------------------------------------------------------------------------------------------------------------------------------------------------------------|-----------------|-----|------------|-----------|
| GM-CSF | NCT00466960 | Sargramostim and Paclitaxel Albumin-Stabilized Nanoparticle Formulation in Treating Patients With Advanced Ovarian Cancer, Fallopian Tube Cancer, or Primary Peritoneal Cancer That Did Not Respond to Previous Chemotherapy | Completed | Brenner Tumor Fallopian Tube Cancer Ovarian Clear Cell Cystadenocarcinoma Ovarian Endometrioid Adenocarcinoma Ovarian Mixed Epithelial Carcinoma Ovarian Mucinous Cystadenocarcinoma Ovarian Serous Cystadenocarcinoma Ovarian Undifferentiated Adenocarcinoma Peritoneal Cavity Cancer Recurrent Ovarian Epithelial Cancer Stage III Ovarian Epithelial                                                                                                                                                                                                                                       | Biological: rituximab Biological: filgrastim Biological: sargramostim Drug: carmustine Drug: cytarabine Drug: etoposide Drug: melphalan Procedure: autologous hematopoietic stem cell transplantation | Time to Progression Response Rate Correlation Between Circulating Monocytes and Time to Progression Correlation Between Circulating Dendritic Cell Count and Maturation State With Clinical Response and Response Duration Precursor Frequency of Circulating Activated T Lymphocytes Against Common Ovarian Cancer Tumor Associated Antigens to Measure the Development of Immunity to Anti-tumor Antigens Precursor Frequency of Circulating T Lymphocytes Activated Against Foreign Antigens                                                                                                                                                                                                | Phase 2         | 21  | May-06     | 28-Aug-17 |
| GM-CSF | NCT00467051 | Combination Chemotherapy in Treating Young Patients With Recurrent or Resistant Malignant Germ Cell Tumors                                                                                                                   | Completed | Childhood Extracranial Germ Cell Tumor Childhood Extragonadal Malignant Germ Cell Tumor Childhood Malignant Ovarian Germ Cell Tumor Childhood Malignant Testicular Germ Cell Tumor Ovarian Choriocarcinoma Ovarian Embryonal Carcinoma Ovarian Yolk Sac Tumor Recurrent Childhood Malignant Germ Cell Tumor Recurrent Malignant Testicular Germ Cell Tumor Recurrent Ovarian Germ Cell Tumor Testicular Choriocarcinoma Testicular Embryonal Carcinoma Testicular Mixed Choriocarcinoma and Embryonal Carcinoma Testicular Mixed Choriocarcinoma and Yolk Sac Tumor Testicular Mixed Embryonal | Drug: Carboplatin Biological: Filgrastim Drug: Ifosfamide Other: Laboratory Biomarker Analysis Drug: Paclitaxel                                                                                       | Response Rate as Measured by Response Evaluation Criteria in Solid Tumors (RECIST) Criteria The Number of Patients Who Experience at Least One Grade 3 or Higher CTC Version 4 Toxicity.                                                                                                                                                                                                                                                                                                                                                                                                                                                                                                       | Phase 3         | 20  | 5-Nov-07   | 29-Aug-18 |
| GM-CSF | NCT00470015 | Vaccine Therapy and GM-CSF With or Without Low-Dose Aldesleukin in Treating Patients With Stage II, Stage III, or Stage IV Melanoma                                                                                          | Completed | Melanoma (Skin)                                                                                                                                                                                                                                                                                                                                                                                                                                                                                                                                                                                | Biological: MART-1 antigen Biological: IL-2 Biological: gp100 antigen Biological: GM-CSF Biological: MART-1a peptide                                                                                  | Percent changes in peptide vaccine-specific immune responses (tetramer frequencies) from pretreatment levels Number and severity of hematologic and nonhematologic toxicities observed at each dose level Delayed-type hypersensitivity positivity Maximum percent change in CD4, CD8, CD14, CD19, and C20 levels from preimmunization                                                                                                                                                                                                                                                                                                                                                         | Phase 1         | 20  | Mar-07     | 19-Feb-19 |
| GM-CSF | NCT00471471 | Vaccine Therapy in Treating Patients With Recurrent Stage III or Stage IV Melanoma That Cannot Be Removed                                                                                                                    | Completed | Intraocular Melanoma Malignant Conjunctival Neoplasm Melanoma (Skin)                                                                                                                                                                                                                                                                                                                                                                                                                                                                                                                           | Biological: Peptide vaccine Biological: GM-CSF Biological: PF3512676                                                                                                                                  | Safety Immunologic response Objective tumor regression Depigmentation evaluation                                                                                                                                                                                                                                                                                                                                                                                                                                                                                                                                                                                                               | Phase 1         | 22  | Oct-08     | 22-Jun-17 |
| GM-CSF | NCT00477815 | Rituximab, Yttrium Y 90 Ibritumomab Tiuxetan, Melphalan, and Autologous Peripheral Stem Cell Transplant in Treating Patients With Previously Treated Multiple Myeloma                                                        | Completed | Multiple Myeloma and Plasma Cell Neoplasm                                                                                                                                                                                                                                                                                                                                                                                                                                                                                                                                                      | Biological: rituximab Drug: melphalan Biological: Stem Cell Biological: Sargramostim (GM-CSF) Radiation: 90Y-Zevalin Biological: 111In Zevalin                                                        | Toxicity as measured by CTCAE v 3.0 Clonotypic B cells Response (complete response, very good partial response, partial response) Time to progression and duration of response Impact of rituximab and yttrium Y 90 ibritumomab tiuxetan on the clonal plasma cells in the blood and marrow prior to high-dose melphalan                                                                                                                                                                                                                                                                                                                                                                       | Phase 1         | 30  | 31-May-05  | 14-May-18 |
| GM-CSF | NCT00483067 | 2-Chlorodeoxyadenosine and Cytarabine in Patients With Idiopathic Hypereosinophilic Syndrome (HES)                                                                                                                           | Completed | Leukemia                                                                                                                                                                                                                                                                                                                                                                                                                                                                                                                                                                                       | Drug: 2-CdA Drug: Ara-C Drug: G-CSF (Granulocyte colony-stimulating factor)                                                                                                                           | Patient Outcomes at 6 Weeks                                                                                                                                                                                                                                                                                                                                                                                                                                                                                                                                                                                                                                                                    | Phase 2         | 13  | Mar-98     | 2-Aug-12  |
| GM-CSF | NCT00488592 | Peptide Vaccinations to Treat Patients With Low-Risk Myeloid Cancers                                                                                                                                                         | Completed | Myelodysplastic Syndrome (MDS) Acute Myeloid Leukemia (AML) Chronic Myeloid Leukemia (CML)                                                                                                                                                                                                                                                                                                                                                                                                                                                                                                     | Biological: WT1:126-134 Biological: PR1:169-177 Peptide Drug: GM-CSF (Sargramostim) Biological: Montanide                                                                                             | Efficacy in Inducing or Boosting a Cellular Immune Response Clinical Response                                                                                                                                                                                                                                                                                                                                                                                                                                                                                                                                                                                                                  | Phase 2         | 10  | Jun-07     | 9-Jul-14  |
| GM-CSF | NCT00488982 | Intermittent Chemotherapy With or Without Granulocyte-macrophage Colony-stimulating Factor (GM-CSF) for Metastatic Hormone Refractory Prostate Cancer (HRPC)                                                                 | Completed | Prostate Cancer                                                                                                                                                                                                                                                                                                                                                                                                                                                                                                                                                                                | Drug: Docetaxel Drug: Docetaxel and GM-CSF                                                                                                                                                            | Time to Progression Overall Survival Number of Participants With PSA Response to Successive Series of Chemotherapy Cumulative Duration of Time on and Off Docetaxel-based Therapy                                                                                                                                                                                                                                                                                                                                                                                                                                                                                                              | Phase 2         | 125 | April 2007 | 20-Nov-19 |
| GM-CSF | NCT00499343 | G-CSF Versus G-CSF Plus GM-CSF for Stem Cell Mobilization in NHL Patients                                                                                                                                                    | Completed | Lymphoma                                                                                                                                                                                                                                                                                                                                                                                                                                                                                                                                                                                       | Drug: Etoposide Drug: G-CSF Drug: GM-CSF Drug: Isophosphamide Drug: Rituximab Procedure: Apheresis                                                                                                    | CD34+ Cells/kg in Blood Stem Cells                                                                                                                                                                                                                                                                                                                                                                                                                                                                                                                                                                                                                                                             | Phase 2         | 84  | Jan-04     | 2-Aug-13  |
| GM-CSF | NCT00499577 | Stem Cell Transplant, Chemotherapy, and Biological Therapy in Treating Patients With High-Risk or Refractory Multiple Myeloma                                                                                                | Completed | Multiple Myeloma and Plasma Cell Neoplasm                                                                                                                                                                                                                                                                                                                                                                                                                                                                                                                                                      | Biological: CMV pp65 peptide Biological: hTERT I540/R572Y/D988Y multipeptide vaccine Biological: pneumococcal polyvalent vaccine Biological: survivin Sur1M2 peptide vaccine                          | Toxicity at 21 and 28 days post-transplant T-cell responses against the hTERT vaccine as measured by tetramer assays at 100 days post-transplant Paraprotein levels in the blood or urine and serum free light chain analyses at 60 days and at 6 months post-transplant Cytotoxic T-cell responses against autologous myeloma cell at day 100 post-transplant via chromium-51 release or flow-based assays Maximum clinical response 1 and 2-year event-free survival Overall survival rates CD4 and CD8 T-cell responses against cytomegalovirus (CMV) at days 60 and 100 post-transplantation by CFSE dye dilution assays Composite binding antibody responses at days 60 and day 100 post- | Phase 1 Phase 2 | 56  | Dec-06     | 10-Jan-14 |
| GM-CSF | NCT00501644 | Chemoimmunotherapy Study for Patients With Epithelial Ovarian Cancer                                                                                                                                                         | Completed | Ovarian Cancer Fallopian Tube Cancer Peritoneal Cancer                                                                                                                                                                                                                                                                                                                                                                                                                                                                                                                                         | Drug: Carboplatin Drug: GM-CSF (Sargramostim) Drug: Interferon Gamma                                                                                                                                  | Number of Patients With Response                                                                                                                                                                                                                                                                                                                                                                                                                                                                                                                                                                                                                                                               | Phase 2         | 59  | Jan-03     | 7-Aug-12  |
| GM-CSF | NCT00506857 | Phase I/II Trial of Fludarabine Plus Busulfan and Allogeneic Progenitor Cell Support                                                                                                                                         | Completed | Hematologic Malignancies                                                                                                                                                                                                                                                                                                                                                                                                                                                                                                                                                                       | Drug: Busulfan Drug: Fludarabine                                                                                                                                                                      | Maximum Tolerated Dose (MTD) Number of Participants With Graft Versus Host Disease (GVHD)                                                                                                                                                                                                                                                                                                                                                                                                                                                                                                                                                                                                      | Phase 1 Phase 2 | 82  | Nov-03     | 28-Feb-12 |
| GM-CSF | NCT00512889 | Adoptive Transfer of MART1/Melan-A CTL for Malignant Melanoma                                                                                                                                                                | Completed | Melanoma (Skin)                                                                                                                                                                                                                                                                                                                                                                                                                                                                                                                                                                                | Biological: therapeutic autologous lymphocytes Genetic: Use of an artificial antigen presenting cell (aAPC) to generate CTL Drug: GM-CSF Radiation: Irradiation of cutaneous tumor lesion             | Define the feasibility of generating large doses of MART1/Melan-A specific CTL following leukapheresis in this patient population Describe the toxicity of two dose levels of adoptively transferred MART1/Melan-A specific CTL lines Define the feasibility of combining the infusion of MART1/Melan-A specific CTL with the administration of GM-CSF +/- radiotherapy Describe the toxicity of combining the infusion of MART1/Melan-A specific CTL with the administration of GM-CSF +/- radiotherapy Evaluate function, phenotype.                                                                                                                                                         | Phase 1         | 9   | Aug-07     | 1-Mar-13  |

|        |             |                                                                                                                                                                           |           |                                                                                                                                                                                                   |                                                                                                                                                                                                                                                                                                                                                |                                                                                                                                                                                                                                                                                                                                                                                                                                                                    |                 |    |        |           |
|--------|-------------|---------------------------------------------------------------------------------------------------------------------------------------------------------------------------|-----------|---------------------------------------------------------------------------------------------------------------------------------------------------------------------------------------------------|------------------------------------------------------------------------------------------------------------------------------------------------------------------------------------------------------------------------------------------------------------------------------------------------------------------------------------------------|--------------------------------------------------------------------------------------------------------------------------------------------------------------------------------------------------------------------------------------------------------------------------------------------------------------------------------------------------------------------------------------------------------------------------------------------------------------------|-----------------|----|--------|-----------|
| GM-CSF | NCT00513474 | Rasburicase in Preventing Graft-Versus-Host Disease in Patients With Hematologic Cancer or Other Disease Undergoing Donor Stem Cell Transplant                            | Completed | Chronic Myeloproliferative Disorders Graft Versus Host Disease Leukemia Lymphoma Multiple Myeloma and Plasma Cell Neoplasm Myelodysplastic Syndromes Myelodysplastic/Myeloproliferative Neoplasms | Drug: busulfan Drug: cyclophosphamide Drug: cyclosporin-A Drug: etoposide Drug: methotrexate Drug: rasburicase Drug: sirolimus Drug: tacrolimus Procedure: allogeneic hematopoietic stem cell transplantation Procedure: peripheral blood stem cell transplantation Radiation: total-                                                          | Percentage of Participants With Grades II to IV Acute Graft-Versus-Host Disease (aGVHD) Uric Acid Levels Number of Participant With Adverse Events (AE) Graft-versus-host and Host-versus-graft Immune Responses                                                                                                                                                                                                                                                   | Phase 1 Phase 2 | 46 | Jan-08 | 25-May-17 |
| GM-CSF | NCT00514215 | Cryotherapy and GM-CSF in Treating Patients With Lung Metastases or Primary Lung Cancer                                                                                   | Completed | Kidney Cancer Lung Cancer Metastatic Cancer Unspecified Adult Solid Tumor, Protocol Specific                                                                                                      | Biological: sargramostim Other: flow cytometry Other: immunoenzyme technique Procedure: biopsy Procedure: cryosurgery                                                                                                                                                                                                                          | Immunologic Response as Measured by ELISPOT Assay and Flow Cytometry Clinical Response as Measured by CT Criteria Toxicity of Grade 1 or Higher Immune Function and Cancer-specific Response                                                                                                                                                                                                                                                                       | Phase 2         | 8  | Jan-06 | 25-Mar-19 |
| GM-CSF | NCT00521014 | GM-CSF and Rituximab After Autologous Stem Cell Transplant in Treating Patients With Relapsed or Refractory Follicular Non-Hodgkin Lymphoma                               | Completed | Lymphoma                                                                                                                                                                                          | Biological: sargramostim Drug: bexarotene Genetic: cytogenetic analysis Genetic: fluorescence in situ hybridization Other: flow cytometry Other: laboratory biomarker analysis Procedure:                                                                                                                                                      | Progression-free Survival Rate                                                                                                                                                                                                                                                                                                                                                                                                                                     | Phase 2         | 14 | Oct-07 | 22-Dec-15 |
| GM-CSF | NCT00523159 | IMA901 in Advanced Renal Cell Carcinoma Patients With Measurable Disease                                                                                                  | Completed | Renal Cell Carcinoma                                                                                                                                                                              | Drug: Endoxana, IMA901, Leukine Drug: IMA901 and Leukine                                                                                                                                                                                                                                                                                       | Disease control rate Tumor response rates and SD rate Duration of response Time to response TTP PFS and OS DCR Immune response Effect of cyclophosphamide pretreatment on immune response Safety                                                                                                                                                                                                                                                                   | Phase 2         | 68 | May-07 | 10-Jul-12 |
| GM-CSF | NCT00533923 | Nonmyeloablative Allogeneic Stem Cell Transplantation From HLA-Matched Unrelated Donor for the Treatment of Hematologic Disorders                                         | Completed | AML ALL CLL Myelodysplastic Syndrome Non-Hodgkin's Lymphoma Hodgkin's Lymphoma Multiple Myeloma Aplastic Anemia Myeloproliferative Disorder                                                       | Drug: Cyclophosphamide; Fludarabine; Cyclosporin; CAMPATH-1H (Alemtuzumab); GM-CSF                                                                                                                                                                                                                                                             | Primary objective of study is to determine the safety of non-myoablative allogeneic stem cell transplantation from matched unrelated donors in patients with hematologic malignancies with a focus on the incidence of treatment-related mortality. Secondary clinical endpoints includes; incidence of graft failure or rejection; incidence and severity of acute and chronic GVHD; tumor response, and long-term overall and disease-free survival.             | Phase 2         | 25 | Dec-02 | 18-Jul-16 |
| GM-CSF | NCT00546377 | Pentostatin, Cyclophosphamide, Rituximab, and Mitoxantrone in Treating Patients With Chronic Lymphocytic Leukemia or Other Low-Grade B-Cell Cancer                        | Completed | Leukemia Lymphoma                                                                                                                                                                                 | Biological: filgrastim Biological: pegfilgrastim Biological: rituximab Biological: sargramostim Drug: cyclophosphamide Drug: mitoxantrone hydrochloride Drug: pentostatin Genetic: fluorescence in situ hybridization Genetic: gene rearrangement analysis Genetic: polymerase chain reaction Genetic: protein expression analysis Other: flow | Overall Response Maximum Tolerated Dose (MTD) of Mitoxantrone                                                                                                                                                                                                                                                                                                                                                                                                      | Phase 2         | 50 | Jul-05 | 12-May-16 |
| GM-CSF | NCT00548847 | Immunotherapy for Acute Myeloid Leukemia (AML), Acute Lymphoblastic Leukemia (ALL), Blast Phase Chronic Myelogenous Leukemia (BP CML), and Myelodysplastic Syndrome (MDS) | Completed | Leukemia                                                                                                                                                                                          | Biological: GM-CSF Biological: Interferon- $\alpha$ -2b                                                                                                                                                                                                                                                                                        | Efficacy of GM-CSF and Pegylated Interferon-alpha 2b When Administered to Patients With AML, ALL, Blast Phase CML, and MDS Relapse After Allogeneic Transplantation, Defined as Progression-free Survival of > 33% at 3 Months Overall Survival at 6 Months (Evaluate Overall Responses; Perform Lab Experiments to Test Hypothesis That Exposure to Interferon-alpha and GM-CSF Up-regulates Co-stimulatory Molecule Expression on Relapsed Acute Leukemia Cells) | Phase 2         | 15 | Jan-07 | 26-Oct-16 |
| GM-CSF | NCT00554372 | A Study of Recombinant Vaccinia Virus to Treat Unresectable Primary Hepatocellular Carcinoma                                                                              | Completed | Carcinoma, Hepatocellular                                                                                                                                                                         | Genetic: JX-594: Recombinant vaccinia virus (TK-deletion plus GM-CSF)                                                                                                                                                                                                                                                                          | Proportion of Subjects Achieving Disease Control (Non-progressive Disease) at 8 Weeks After Initiation of Treatment Safety and Tolerability of JX-594 Administered at Two Dose Levels Number of Subjects Achieving Disease Control as Determined Using Intrahepatic Modified RECIST Criteria Median Overall Survival                                                                                                                                               | Phase 1         | 30 | Aug-08 | 4-Feb-16  |
| GM-CSF | NCT00556127 | Rituximab in Addition to Chemotherapy With Autologous Stem Cell Transplantation as Treatment Diffuse Large B-Cell Lymphoma                                                | Completed | Diffuse Large B-Cell Lymphoma POOR PROGNOSIS                                                                                                                                                      | Drug: Rituximab Drug: Epirubicin Drug: Cyclophosphamide Drug: Vincristine Drug: Prednisone Drug: Granulocyte-colony-stimulating factor Drug: Mitoxantrone Drug: Cytarabine ARA-C Drug: Dexamethasone Drug: Carmustine BCNU Drug: Etoposide Drug: Melphalan Radiation:                                                                          | Failure-free survival                                                                                                                                                                                                                                                                                                                                                                                                                                              | Phase 2         | 94 | Jun-02 | 9-Nov-07  |
| GM-CSF | NCT00559104 | Combination Chemotherapy With or Without Total-Body Irradiation Followed By Stem Cell Transplant in Treating Patients With Non-Hodgkin Lymphoma                           | Completed | Lymphoma                                                                                                                                                                                          | Drug: cyclophosphamide Drug: etoposide Procedure: autologous hematopoietic stem cell transplantation Procedure: peripheral blood                                                                                                                                                                                                               | Progression Mortality Short-term and Long-term Treatment-related Toxicities                                                                                                                                                                                                                                                                                                                                                                                        | Phase 2         | 60 | Oct-98 | 11-Aug-15 |
| GM-CSF | NCT00561275 | Safety Study of Multiple Peptide Vaccine to Esophageal Cancer                                                                                                             | Completed | Esophageal Cancer                                                                                                                                                                                 | Biological: LY6K, VEGFR1, VEGFR2                                                                                                                                                                                                                                                                                                               | Toxicity of multiple peptide vaccinations Immune responses including LY6K, VEGFR1 and VEGFR2 specific T cells                                                                                                                                                                                                                                                                                                                                                      | Phase 1         | 6  | Oct-07 | 15-Jul-08 |
| GM-CSF | NCT00562328 | Rituximab, Alemtuzumab, and GM-CSF As First-Line Therapy in Treating Patients With Early-Stage Chronic Lymphocytic Leukemia                                               | Completed | Leukemia                                                                                                                                                                                          | Biological: Alemtuzumab Biological: Rituximab Biological: Sargramostim                                                                                                                                                                                                                                                                         | Number of Confirmed Responses (Complete or Partial Response Noted as the Objective Status for a Duration of at Least 2 Months) at 6 Months Progression Free Survival Duration of Response Time to Next Treatment Overall Survival                                                                                                                                                                                                                                  | Phase 2         | 33 | Jan-08 | 5-Feb-20  |

|        |             |                                                                                                                                                                                  |           |                                                                                                                                                                                                                     |                                                                                                                                                                                                                                                                                                                                                                                                                                                                                     |                                                                                                                                                                                                                                                                                                                                                                                                                                                                                                                                                                                                                                                                                                                                                                                                                                                                                                                                                                                                                                                                                                                                                                                                                                                                                                                                                                                                                        |               |     |            |               |
|--------|-------------|----------------------------------------------------------------------------------------------------------------------------------------------------------------------------------|-----------|---------------------------------------------------------------------------------------------------------------------------------------------------------------------------------------------------------------------|-------------------------------------------------------------------------------------------------------------------------------------------------------------------------------------------------------------------------------------------------------------------------------------------------------------------------------------------------------------------------------------------------------------------------------------------------------------------------------------|------------------------------------------------------------------------------------------------------------------------------------------------------------------------------------------------------------------------------------------------------------------------------------------------------------------------------------------------------------------------------------------------------------------------------------------------------------------------------------------------------------------------------------------------------------------------------------------------------------------------------------------------------------------------------------------------------------------------------------------------------------------------------------------------------------------------------------------------------------------------------------------------------------------------------------------------------------------------------------------------------------------------------------------------------------------------------------------------------------------------------------------------------------------------------------------------------------------------------------------------------------------------------------------------------------------------------------------------------------------------------------------------------------------------|---------------|-----|------------|---------------|
| GM-CSF | NCT00567567 | Comparing Two Different Myeloablation Therapies in Treating Young Patients Who Are Undergoing a Stem Cell Transplant for High-Risk Neuroblastoma                                 | Completed | Localized Resectable Neuroblastoma Localized Unresectable Neuroblastoma Recurrent Neuroblastoma Regional Neuroblastoma Stage 4 Neuroblastoma Stage 4S Neuroblastoma                                                 | Procedure: Autologous Hematopoietic Stem Cell Transplantation Drug: Carboplatin Drug: Cisplatin Drug: Cyclophosphamide Drug: Doxorubicin Hydrochloride Drug: Etoposide Radiation: External Beam Radiation Therapy Biological: Filgrastim Drug: Isotretinoin Other: Laboratory Biomarker Analysis Drug: Melphalan Procedure: Peripheral Blood Stem Cell Transplantation Other: Pharmacological Study Drug: Thiotepa Drug: Topotecan Hydrochloride Drug: Vincristine Sulfate Liposome | Event-free Survival Rate Incidence Rate of Local Recurrence Response After Induction Therapy Duration of Greater Than or Equal to Grade 3 Neutropenia Duration of Greater Than or Equal to Grade 3 Thrombocytopenia EFS Pts Non-randomly Assigned to Single CEM (12-18 Mths, Stg. 4, MYCN Nonamplified Tumor/Unfavorable or Indeterminant Histopathology/Diploid DNA Content & Pts>547 Days, Stg.3, MYCN Nonamplified Tumor AND Unfavorable or Indeterminant Histopathology). Enumeration of Peripheral Blood Cluster of Differentiation (CD)3, CD4, and CD8 Cells Intraspinal Extension OS in Patients 12-18 Months, Stage 4, MYCN Nonamplified Tumor/Unfavorable Histopathology/Diploid DNA Content/Indeterminant Histology/Ploidy and Patients > 547 Days, Stage 3, MYCN Nonamplified Tumor AND Unfavorable Histopathology/Indeterminant Histology Peak Serum Concentration of Isotretinoin in Patients Enrolled on Either A3973, ANBL0032, ANBL0931, ANBL0532 and Future High Risk Studies Pharmacogenetic Variants in Patients Enrolled on Either A3973, ANBL0032, ANBL0931, ANBL0532 and Future High Risk Studies Presence and Function of T Cells Capable of Recognizing Neuroblastoma Proportion of Patients With Neuroblastoma Detected in Bone Marrow and Peripheral Blood Using RT-PCR Technique Response Rate Surgical Response Topotecan Systemic Clearance Type of Surgical or Radiotherapy Complication | Phase 2       | 630 | 5-Nov-07   | 1-May-19      |
| GM-CSF | NCT00568763 | Radiofrequency Therapy-Induced Endogenous Heat-Shock Proteins With or Without Radiofrequency Ablation or Cryotherapy in Treating Patients With Stage IV Melanoma                 | Completed | Melanoma (Skin)                                                                                                                                                                                                     | Biological: sargramostim Other: immunoenzyme technique Other: immunohistochemistry staining method Other: immunologic technique Other: laboratory biomarker analysis Procedure: biopsy Procedure:                                                                                                                                                                                                                                                                                   | Toxicity Heat-shock protein levels Tumor-specific immune response Extent of lymphocyte infiltration Tumor response by RECIST criteria                                                                                                                                                                                                                                                                                                                                                                                                                                                                                                                                                                                                                                                                                                                                                                                                                                                                                                                                                                                                                                                                                                                                                                                                                                                                                  | Phase 1       | 11  | 25-Nov-05  | 31-Oct-18     |
| GM-CSF | NCT00571662 | Safety and Efficacy of Pentostatin and Low Dose TBI With Allogeneic Peripheral Blood Stem Cell Transplant                                                                        | Completed | Acute Myelogenous Leukemia Acute Lymphocytic Leukemia Chronic Myelogenous Leukemia Chronic Lymphocytic Leukemia Myelodysplastic Syndromes Multiple Myeloma Non-Hodgkins Lymphoma Hodgkins Disease Peripheral T-cell | Drug: Pentostatin Radiation: Total-body irradiation (TBI) Drug: Cyclosporine A (CsA) Drug: Mycophenolate Mofetil (MMF) Drug: G-CSF                                                                                                                                                                                                                                                                                                                                                  | Percent of Participants With Chimerism: Full Donor Chimerism Defined as >95% Donor CD3+ Cell in Blood as Assessed by DNA Fingerprinting Toxicity for the Combination of Pentostatin and Low Dose Total Body Irradiation (TBI) Incidence of Acute and Chronic Graft-versus-host Disease Responses to Therapy Kinetics of Immunologic Reconstitution After Allogeneic Transplantation                                                                                                                                                                                                                                                                                                                                                                                                                                                                                                                                                                                                                                                                                                                                                                                                                                                                                                                                                                                                                                    | Phase 1       | 76  | Dec-00     | 20-Nov-18     |
| GM-CSF | NCT00580060 | Injection Of AJCC Stage IIB, IIC, III And IV Melanoma Patients With A Multi-Epitope Peptide Vaccine Using GM-CSF DNA As An Adjuvant: A Pilot Trial To Assess Safety And Immunity | Completed | Melanoma                                                                                                                                                                                                            | Biological: GM-CSF DNA, NSC 683472 gp100: 209-217(210M), NSC 699048 Tyrosinase: 368-376(370D)                                                                                                                                                                                                                                                                                                                                                                                       | To establish the safety and a recommended dose of subcutaneous human GM-CSF DNA given in conjunction with a multi-epitope peptide vaccine in patients with AJCC stage IIB, IIC, III and IV melanoma who are HLA-A2+. To evaluate serum pharmacokinetics of GM-CSF after subcutaneous administration of human GM-CSF DNA. If toxicities are encountered in the dose ranging part of the study, to establish the maximum tolerated dose (MTD) and dose limiting toxicities (DLT). In the immunological efficacy study, to evaluate the immunogenicity of a multi-epitope peptide vaccine. A secondary endpoint is to observe the patients for evidence of any anti-tumor response that is generated after                                                                                                                                                                                                                                                                                                                                                                                                                                                                                                                                                                                                                                                                                                                | Early Phase 1 | 20  | Dec-03     | 10-Jun-11     |
| GM-CSF | NCT00582725 | R-CHOP + GM-CSF for Previously Untreated LCL in Elderly                                                                                                                          | Completed | Lymphoma, Large B-Cell, Diffuse                                                                                                                                                                                     | Drug: R-CHOP+GM-CSF                                                                                                                                                                                                                                                                                                                                                                                                                                                                 | Response Rate to Therapy                                                                                                                                                                                                                                                                                                                                                                                                                                                                                                                                                                                                                                                                                                                                                                                                                                                                                                                                                                                                                                                                                                                                                                                                                                                                                                                                                                                               | Phase 2       | 38  | Mar-02     | 13-Dec-19     |
| GM-CSF | NCT00600002 | Administration as a Biological Adjuvant in Clinically-Staged, Resectable Pancreatic                                                                                              | Completed | Resectable Pancreatic Adenocarcinoma Pancreatic Cancer                                                                                                                                                              | Biological: GM-CSF                                                                                                                                                                                                                                                                                                                                                                                                                                                                  | Evaluate toxicity, dendritic cell recruitment, and immune parameters Evaluate patient survival Evaluate progression free survival Evaluate time to treatment failure Evaluate quality of life Evaluate biochemical markers                                                                                                                                                                                                                                                                                                                                                                                                                                                                                                                                                                                                                                                                                                                                                                                                                                                                                                                                                                                                                                                                                                                                                                                             | Phase 1       | 30  | Jun-04     | 11-Jun-18     |
| GM-CSF | NCT00602706 | Samarium Sm 153 Lexidronam Pentasodium and High-Dose Melphalan in Treating Patients With Multiple Myeloma Undergoing Stem Cell Transplant                                        | Completed | Multiple Myeloma and Plasma Cell Neoplasm                                                                                                                                                                           | Biological: sargramostim Drug: melphalan Procedure: autologous hematopoietic stem cell transplantation Procedure: peripheral blood stem cell transplantation Radiation:                                                                                                                                                                                                                                                                                                             | Number of toxicity incidents (Phase I) Proportion of successes (Phase II) Number of responses (Phase I) Overall survival (Phase II) Progression-free survival (Phase II) Time to progression (Phase I) Progressive disease variables                                                                                                                                                                                                                                                                                                                                                                                                                                                                                                                                                                                                                                                                                                                                                                                                                                                                                                                                                                                                                                                                                                                                                                                   | Phase 1       | 76  | Jan-00     | 16-May-11     |
| GM-CSF | NCT00616564 | Phase II Trial of (IL-2) With Priming and (GM-CSF) in Patients With Advanced Melanoma                                                                                            | Completed | Malignant Melanoma                                                                                                                                                                                                  | Drug: GM-CSF                                                                                                                                                                                                                                                                                                                                                                                                                                                                        | Primary Objective                                                                                                                                                                                                                                                                                                                                                                                                                                                                                                                                                                                                                                                                                                                                                                                                                                                                                                                                                                                                                                                                                                                                                                                                                                                                                                                                                                                                      | Phase 2       | 36  | Feb-06     | 3-May-12      |
| GM-CSF | NCT00625456 | Safety Study of Recombinant Vaccinia Virus to Treat Refractory Solid Tumors                                                                                                      | Completed | Melanoma Lung Cancer Renal Cell Carcinoma Squamous Cell Carcinoma of the Head and Neck                                                                                                                              | Drug: Recombinant Vaccinia GM-CSF; RAC VAC GM-CSF (JX-594)                                                                                                                                                                                                                                                                                                                                                                                                                          | Maximally-tolerated dose (MTD) and/or maximum-feasible dose (MFD) of JX-594 administered by intravenous (IV) infusion Safety/Toxicity: Incidence of treatment-related adverse events; treatment-related serious adverse events; treatment-related Grade 3/4 toxicities; and clinically-significant, treatment-related changes from baseline in routine laboratory parameters Determine the JX-594 pharmacokinetics and pharmacodynamics over time following IV infusion Determine the immune response to JX-594 following IV infusion Determine the delivery of JX-594 to, and concentration within, solid tumors                                                                                                                                                                                                                                                                                                                                                                                                                                                                                                                                                                                                                                                                                                                                                                                                      | Phase 1       | 23  | Jun-08     | 3-Dec-15      |
| GM-CSF | NCT00626483 | Basiliximab in Treating Patients With Newly Diagnosed Glioblastoma Multiforme Undergoing Targeted Immunotherapy and Temozolomide-                                                | Completed | Malignant Neoplasms Brain                                                                                                                                                                                           | Biological: RNA-loaded dendritic cell vaccine Drug: basiliximab                                                                                                                                                                                                                                                                                                                                                                                                                     | Functional capacity of CD4+, CD25+, CD127- T-regulatory cells Safety of CMV pulsed pp65 DC vaccines Effect of basiliximab on pp65 vaccine Effect of basiliximab on immune profiles Progression-free survival (PFS) Characterize immune cells in recurrent tumors                                                                                                                                                                                                                                                                                                                                                                                                                                                                                                                                                                                                                                                                                                                                                                                                                                                                                                                                                                                                                                                                                                                                                       | Phase 1       | 34  | April 2007 | 24, 28-Aug-19 |

|        |             |                                                                                                                                                                      |           |                                       |                                                                                                                                                                                                                                                                                                                                                                                                   |                                                                                                                                                                                                                                                                                                                                                                                                                                                                                                                                                                                                                                                                                                                                   |                 |     |            |           |
|--------|-------------|----------------------------------------------------------------------------------------------------------------------------------------------------------------------|-----------|---------------------------------------|---------------------------------------------------------------------------------------------------------------------------------------------------------------------------------------------------------------------------------------------------------------------------------------------------------------------------------------------------------------------------------------------------|-----------------------------------------------------------------------------------------------------------------------------------------------------------------------------------------------------------------------------------------------------------------------------------------------------------------------------------------------------------------------------------------------------------------------------------------------------------------------------------------------------------------------------------------------------------------------------------------------------------------------------------------------------------------------------------------------------------------------------------|-----------------|-----|------------|-----------|
| GM-CSF | NCT00629759 | A Study of Recombinant Vaccinia Virus to Evaluate the Safety and Efficacy of a Transdermal Injection Within the Tumor of Patients With Primary or Metastatic Hepatic | Completed | Neoplasms, Liver                      | Genetic: JX-594: Recombinant vaccinia virus (TK-deletion plus GM-CSF)                                                                                                                                                                                                                                                                                                                             | To determine the maximum tolerable dose (MTD) and/or the maximum feasible dose (MFD), as well as to evaluate the safety of JX-594 injected within unresectable solid tumor(s) within the liver Secondary objectives include determination of JX-594 pharmacokinetics, replication and shedding, immune response, and injection site tumor responses.                                                                                                                                                                                                                                                                                                                                                                              | Phase 1         | 14  | Jan-06     | 4-Jan-13  |
| GM-CSF | NCT00631072 | In Vitro Expanded Autologous Invariant Natural Killer Cells in Cancer                                                                                                | Completed | Malignant Melanoma                    | Biological: iNKT Drug: GM-CSF                                                                                                                                                                                                                                                                                                                                                                     | To determine the feasibility of isolating and expanding in vitro autologous iNKT cells from cancer patients for therapeutic use. To assess the safety of treatment with in vitro expanded autologous iNKT cells alone, and in conjunction with GM-CSF. To assess the biological activity of reinfused in vitro expanded autologous iNKT cells. To assess the biological activity of reinfused in vitro expanded autologous iNKT cells in conjunction with                                                                                                                                                                                                                                                                         | Phase 1         | 9   | Feb-08     | 9-Jun-17  |
| GM-CSF | NCT00640861 | Vaccine Therapy in Treating Patients With Previously Treated Stage II or Stage III Breast Cancer                                                                     | Completed | Breast Cancer                         | Biological: CpG oligodeoxynucleotide Biological: HER-2/neu peptide vaccine Biological: MUC-1 peptide vaccine Biological: incomplete Freund's adjuvant Biological: sargramostim Other: immunoenzyme technique Other: immunologic technique                                                                                                                                                         | patient's peripheral blood sample as estimated by flow cytometry with a panel of monoclonal antibodies Frequency of peptide-specific IFN-gamma producing T cells and peptide-specific IL-5 producing T cells estimated by ELISPOT after in vitro stimulation with peptide-sensitized stimulator cells for MUC1 and HER-2 peptides Number and severity of hematologic and non-hematologic toxicities reported using the NCI-CTC version 3.0 criteria Disease-free survival, defined as the time from registration to the documentation of a first failure where a failure is the recurrence of breast cancer or a diagnosis of a second primary cancer Overall survival, defined as the time from registration to death due to any | Early Phase 1   | 45  | 28-Aug-08  | 31-Oct-18 |
| GM-CSF | NCT00643097 | Vaccine Therapy in Treating Patients With Newly Diagnosed Glioblastoma                                                                                               | Completed | Malignant Neoplasms of Brain          | Biological: PEP-3 vaccine Biological: sargramostim Drug: Temozolomide                                                                                                                                                                                                                                                                                                                             | Humoral and Cellular Immune Response Clinical Efficacy of Vaccination, in Terms of Progression-free Survival (PFS) Response to Vaccination Toxicity to PEP-3 Vaccine                                                                                                                                                                                                                                                                                                                                                                                                                                                                                                                                                              | Phase 1         | 40  | Sep-07     | 1-Feb-17  |
| GM-CSF | NCT00651937 | Trial of Two Stem Cell Doses To Reduce Transplant Induced Symptom Burden                                                                                             | Completed | Multiple Myeloma Primary Amyloidosis  | Drug: Melphalan Procedure: Stem Cell Infusion Behavioral: Questionnaires Drug: Granulocyte-colony stimulating factor (G-CSF) Procedure: Apheresis                                                                                                                                                                                                                                                 | Mean Symptom Severity Burden as Measured by MDASI Scores                                                                                                                                                                                                                                                                                                                                                                                                                                                                                                                                                                                                                                                                          | Phase 1 Phase 2 | 80  | Mar-08     | 14-Jan-20 |
| GM-CSF | NCT00652860 | Combination Chemotherapy, Radiation Therapy, and Sargramostim Before and After Surgery in Treating Patients With Soft Tissue Sarcoma That Can Be Removed By Surgery  | Completed | Metastatic Cancer Sarcoma             | Biological: aerosol sargramostim Biological: sargramostim Drug: cisplatin Drug: doxorubicin hydrochloride Drug: ifosfamide Drug: mitomycin C Other: flow cytometry Other: immunological diagnostic method Other: laboratory biomarker analysis Procedure: adjuvant therapy Procedure: multimodality therapy Procedure: neoadjuvant therapy Procedure: therapeutic conventional surgery Radiation: | Pulmonary metastatic progression-free rate at 2 years Survival Time to progression Toxicity as per NCI CTC Version 2.0 Tumor response every 4 weeks during treatment                                                                                                                                                                                                                                                                                                                                                                                                                                                                                                                                                              | Phase 2         | 39  | Aug-01     | 16-May-11 |
| GM-CSF | NCT00656123 | Study of Colon GVAX and Cyclophosphamide in Patients With Metastatic Colorectal Cancer                                                                               | Completed | Colorectal Cancer Metastatic Cancer   | Biological: Colon GVAX Drug: cyclophosphamide                                                                                                                                                                                                                                                                                                                                                     | Number of Patients Experiencing a Grade 3 or Above Treatment-related Toxicity Percent Fold change in amount of interferon gamma-producing Ep-CAM-specific CD8 T cells after vaccination                                                                                                                                                                                                                                                                                                                                                                                                                                                                                                                                           | Phase 1         | 9   | Mar-08     | 14-Aug-19 |
| GM-CSF | NCT00661622 | Halt Growth of Liver Tumors From Uveal Melanoma With Closure of Liver Artery Following Injection of                                                                  | Completed | Uveal Melanoma Liver Metastases       | Drug: GM-CSF Procedure: Embolization                                                                                                                                                                                                                                                                                                                                                              | Response of Liver Metastases Overall Response Rate Overall Survival Median Progression Free Survival Systemic Progression Free Survival                                                                                                                                                                                                                                                                                                                                                                                                                                                                                                                                                                                           | Phase 2         | 53  | Oct-04     | 29-Nov-16 |
| GM-CSF | NCT00665002 | Pilot Trial of a WT-1 Analog Peptide Vaccine in Patients With Myeloid Neoplasms                                                                                      | Completed | Leukemia                              | Biological: WT-1 Drug: Montanide Drug: Sargramostim (GM-CSF)                                                                                                                                                                                                                                                                                                                                      | Number of Participants With Adverse Events (AEs) Participants Whose Samples Demonstrated Immunological Response After Vaccination                                                                                                                                                                                                                                                                                                                                                                                                                                                                                                                                                                                                 | Phase 2         | 16  | Jun-08     | 27-Feb-15 |
| GM-CSF | NCT00669318 | Pentostatin, Alemtuzumab, and Rituximab in Treating Patients With Relapsed or Refractory Chronic Lymphocytic Leukemia or Small                                       | Completed | Leukemia Lymphoma                     | Biological: alemtuzumab Biological: rituximab Drug: pentostatin Drug: sargramostim                                                                                                                                                                                                                                                                                                                | Complete Response Rate Overall Response Rate (Complete and Partial Response) Overall Survival Progression-free Survival Time to Retreatment                                                                                                                                                                                                                                                                                                                                                                                                                                                                                                                                                                                       | Phase 1         | 41  | Jul-08     | 1-Jul-14  |
| GM-CSF | NCT00671658 | Modified Hyper-CVAD (Cyclophosphamide, Vincristine, Adriamycin, and Dexamethasone) Program for Acute Lymphoblastic Leukemia                                          | Completed | Leukemia Acute Lymphoblastic Leukemia | Drug: Rituximab Drug: Cyclophosphamide (CTX) Drug: Doxorubicin Drug: Vincristine Drug: Dexamethasone Drug: Methotrexate (MTX) Drug: Cytarabine Drug: G-CSF Drug: Mesna Drug: Pegylated asparaginase Drug: Pegfilgrastim Drug:                                                                                                                                                                     | Overall Response Rate                                                                                                                                                                                                                                                                                                                                                                                                                                                                                                                                                                                                                                                                                                             | Phase 2         | 220 | Nov-02     | 26-Aug-13 |
| GM-CSF | NCT00674791 | Study of Cancer Peptides Vaccine Plus GM-CSF as Adjuvant Treatment for High Risk (TXN2-3M0) or Metastatic Breast Cancer With No                                      | Completed | Breast Cancer                         | Biological: OCPM Immunotherapeutic Vaccine                                                                                                                                                                                                                                                                                                                                                        | Safety/tolerability: Number of subjects with dose limiting toxicity after 3 immunizations. Immunologic response: Number of subjects with tumor antigen specific immune response after 3 immunizations.                                                                                                                                                                                                                                                                                                                                                                                                                                                                                                                            | Phase 1         | 13  | Jun-07     | 19-Jun-13 |
| GM-CSF | NCT00678054 | Study of Granulocyte-Macrophage Colony-Stimulating Factor (GM-CSF) for Patients With Rising Prostate-Specific Antigen (PSA)                                          | Completed | Prostate Cancer                       | Drug: GM-CSF                                                                                                                                                                                                                                                                                                                                                                                      | PSA Response                                                                                                                                                                                                                                                                                                                                                                                                                                                                                                                                                                                                                                                                                                                      | Phase 2         | 30  | April 1999 | 23-Aug-17 |

|        |             |                                                                                                                                                                                      |           |                                                                                                                                                                                                                                                 |                                                                                                                                                                                                                                                                                                                                                                                                             |                                                                                                                                                                                                                                                                                                                                                                                                                                                                                                                                                                                                                       |                 |     |            |           |
|--------|-------------|--------------------------------------------------------------------------------------------------------------------------------------------------------------------------------------|-----------|-------------------------------------------------------------------------------------------------------------------------------------------------------------------------------------------------------------------------------------------------|-------------------------------------------------------------------------------------------------------------------------------------------------------------------------------------------------------------------------------------------------------------------------------------------------------------------------------------------------------------------------------------------------------------|-----------------------------------------------------------------------------------------------------------------------------------------------------------------------------------------------------------------------------------------------------------------------------------------------------------------------------------------------------------------------------------------------------------------------------------------------------------------------------------------------------------------------------------------------------------------------------------------------------------------------|-----------------|-----|------------|-----------|
| GM-CSF | NCT00686556 | Total Marrow Irradiation for Refractory Acute Leukemia                                                                                                                               | Completed | Acute Lymphoblastic Leukemia Myelodysplastic Syndrome Multiple Myeloma                                                                                                                                                                          | Drug: cyclophosphamide Drug: cyclosporine Drug: Fludarabine Drug: mycophenolate mofetil Radiation: total marrow irradiation Procedure: umbilical cord blood transplantation Biological: Granulocyte colony-stimulating factor Biological: HLA-matched related                                                                                                                                               | Maximum tolerated dose (MTD) of total marrow irradiation (TMI) Incidence of neutrophil engraftment Incidence of platelet engraftment Incidence of complete donor chimerism Incidence of transplantation-related mortality Incidence of grade II-IV and grade III-IV acute graft-versus-host disease (GVHD) after transplantation Incidence of chronic GVHD after transplantation Incidence of relapse after transplantation Disease-free survival after transplantation Durability of remission based on presence of rapid early response after transplantation Overall survival after transplantation                | Phase 1         | 12  | Aug-12     | 5-Dec-17  |
| GM-CSF | NCT00720109 | Dasatinib and Combination Chemotherapy in Treating Young Patients With Newly Diagnosed Acute Lymphoblastic Leukemia                                                                  | Completed | Adult B Acute Lymphoblastic Leukemia With t(9;22)(q34;q11.2); BCR-ABL1 Childhood B Acute Lymphoblastic Leukemia With t(9;22)(q34;q11.2); BCR-ABL1 Untreated Adult Acute Lymphoblastic Leukemia Untreated Childhood Acute Lymphoblastic Leukemia | Drug: Asparaginase Drug: Cyclophosphamide Drug: Cytarabine Drug: Dasatinib Drug: Daunorubicin Hydrochloride Drug: Dexamethasone Drug: Etoposide Biological: Filgrastim Drug: Hydrocortisone Sodium Succinate Drug: Ifosfamide Other: Laboratory Biomarker Analysis Drug: Leucovorin Calcium Drug: Mercaptopurine Drug: Methotrexate Drug: Methylprednisolone Drug: Pegasparsase Drug: Prednisone Radiation: | Event-Free Survival (EFS) of Patients With Standard-risk Disease Treated With Dasatinib in Combination With Intensified Chemotherapy Feasibility and Toxicity of an Intensified Chemotherapeutic Regimen Incorporating Dasatinib for Treatment of Children and Adolescents With Ph+ ALL Assessed by Examining Adverse Events Contribution of Dasatinib on Minimal Residual Disease (MRD) After Induction Therapy Percent of Patients MRD Positive (MRD > 0.01%) at End of Consolidation Overall EFS Rate for the Combined Cohort of Standard- and High-Risk Patients (Who Receive the Final Chosen Dose of Dasatinib) | Phase 2         | 63  | Jul-08     | 7-Oct-16  |
| GM-CSF | NCT00724386 | Concomitant Chemoradiotherapy With Weekly Paclitaxel and Vinorelbine and Granulocyte Colony Stimulating Factor (G-CSF) Support in Patients With Advanced Breast                      | Completed | Breast Cancer                                                                                                                                                                                                                                   | Drug: Paclitaxel Drug: Vinorelbine Drug: Filgrastim Radiation: Radiation                                                                                                                                                                                                                                                                                                                                    | feasibility of administering study therapy to limit skin toxicity dose-limiting toxicity response time to progression overall survival Bcl-2 detection by immunohistochemistry                                                                                                                                                                                                                                                                                                                                                                                                                                        | Phase 1         | 26  | Jun-99     | 7-Mar-14  |
| GM-CSF | NCT00741325 | Long-Term Follow-up Study for Non-Hodgkin's Lymphoma Patients Who Received Study Treatment (Plerixafor or Placebo) in the AMD3100-3101 Study                                         | Completed | Non-Hodgkin's Lymphoma Autologous Transplantation                                                                                                                                                                                               | Drug: granulocyte colony-stimulating factor (G-CSF) Drug: plerixafor Drug: Placebo                                                                                                                                                                                                                                                                                                                          | Progression-free survival and overall survival of patients treated with at least 1 dose of study treatment (placebo or plerixafor) in protocol AMD3100-3101 (NCT00103610).                                                                                                                                                                                                                                                                                                                                                                                                                                            |                 | 178 | Jun-06     | 11-Feb-14 |
| GM-CSF | NCT00741780 | Long-Term Follow-up Study for Multiple Myeloma Patients Who Received Study Treatment (Plerixafor or Placebo) in the                                                                  | Completed | Multiple Myeloma Autologous Transplantation                                                                                                                                                                                                     | Drug: Placebo Drug: plerixafor Drug: granulocyte colony-stimulating factor (G-CSF)                                                                                                                                                                                                                                                                                                                          | Progression-free survival and overall survival of patients treated with at least 1 dose of study treatment (placebo or plerixafor) in protocol AMD3100-3102 (NCT00103662)                                                                                                                                                                                                                                                                                                                                                                                                                                             |                 | 164 | Jun-06     | 24-Mar-15 |
| GM-CSF | NCT00742924 | Zoledronic Acid and Combination Chemotherapy in Treating Patients With Newly Diagnosed Metastatic Osteosarcoma                                                                       | Completed | Sarcoma                                                                                                                                                                                                                                         | Drug: cisplatin Drug: dexrazoxane hydrochloride Drug: doxorubicin hydrochloride Drug: etoposide Drug: ifosfamide Drug: leucovorin calcium Drug: methotrexate Drug: zoledronic acid Procedure: adjuvant therapy Procedure: therapeutic                                                                                                                                                                       | Limiting Toxicity Histologic Response as Assessed in the Primary Tumor and in Resected Metastases Event-free Survival Secondary Limiting Toxicity Prognostic Value of Bone Resorption Markers                                                                                                                                                                                                                                                                                                                                                                                                                         | Phase 2         | 24  | Aug-08     | 4-Jul-14  |
| GM-CSF | NCT00769704 | Efficacy and Safety Study of Talimogene Laherparepvec Compared to Granulocyte Macrophage Colony Stimulating                                                                          | Completed | Melanoma                                                                                                                                                                                                                                        | Biological: Talimogene laherparepvec Biological: GM-CSF                                                                                                                                                                                                                                                                                                                                                     | Durable Response Rate Overall Survival Objective Response Rate Duration of Response Response Onset Time to Treatment Failure Response Interval                                                                                                                                                                                                                                                                                                                                                                                                                                                                        | Not Applicable  | 437 | April 2009 | 13-Jul-16 |
| GM-CSF | NCT00770172 | G-CSF in Preventing Neutropenia in Patients With Solid Tumors Who Are Receiving Chemotherapy                                                                                         | Completed | Chemotherapeutic Toxicity Neutropenia Agent Protocol Specific                                                                                                                                                                                   | Biological: filgrastim                                                                                                                                                                                                                                                                                                                                                                                      | Number of courses of G-CSF required                                                                                                                                                                                                                                                                                                                                                                                                                                                                                                                                                                                   | Phase 3         | 140 | Oct-07     | 13-May-11 |
| GM-CSF | NCT00771433 | G-CSF in Preventing Neutropenia in Women Receiving Chemotherapy for Breast Cancer                                                                                                    | Completed | Breast Cancer Chemotherapeutic Toxicity Neutropenia                                                                                                                                                                                             | Biological: filgrastim                                                                                                                                                                                                                                                                                                                                                                                      | Occurrence of febrile neutropenia                                                                                                                                                                                                                                                                                                                                                                                                                                                                                                                                                                                     | Phase 2         | 120 | Oct-07     | 13-May-11 |
| GM-CSF | NCT00779402 | PROvenge Treatment and Early Cancer Treatment                                                                                                                                        | Completed | Prostate Cancer                                                                                                                                                                                                                                 | Other: Control Biological: Sipuleucel-T                                                                                                                                                                                                                                                                                                                                                                     | Time to Biochemical Failure Cumulative Incidence Percentile Number of Subjects That Met Biochemical Failure Status                                                                                                                                                                                                                                                                                                                                                                                                                                                                                                    | Phase 3         | 176 | Oct-01     | 29-Jan-18 |
| GM-CSF | NCT00785122 | IMA910 Plus GM-CSF With Low-dose Cyclophosphamide Pre-treatment in Advanced Colorectal Carcinoma Patients Following a Successful 12 Week First-line Treatment With Oxaliplatin-based | Completed | Colorectal Carcinoma                                                                                                                                                                                                                            | Drug: Endoxana, Leukine, IMA910 Drug: Endoxana, Leukine, IMA910, Aldara                                                                                                                                                                                                                                                                                                                                     | Disease control rate Safety assessment Tumour response rates and SD rate DCR Duration of response Progression free survival Cellular immunomonitoring Biomarkers Analysis of tumor tissue Overall Safety Effect of imiquimod (2nd Cohort) on immune response Overall survival Non-Cellular immunomonitoring                                                                                                                                                                                                                                                                                                           | Phase 1 Phase 2 | 92  | Jun-08     | 16-May-13 |
| GM-CSF | NCT00790647 | Melphalan, Bortezomib, and Stem Cell Transplant in Treating Patients With Primary Systemic Amyloidosis                                                                               | Completed | Multiple Myeloma                                                                                                                                                                                                                                | Biological: filgrastim Drug: bortezomib Drug: melphalan Procedure: Stem Cell Infusion                                                                                                                                                                                                                                                                                                                       | Number of Participants With Hematologic Response Number of Participants Surviving at 100 Days From Transplant Number of Participants Surviving at 1 Year Number of Participants Surviving at 2 Years                                                                                                                                                                                                                                                                                                                                                                                                                  | Phase 2         | 10  | Jun-08     | 6-Feb-17  |
| GM-CSF | NCT00791037 | Vaccine Therapy in Treating Patients With Stage IV Breast Cancer                                                                                                                     | Completed | HER2-positive Breast Cancer Male Breast Cancer Recurrent Breast Cancer Stage IV Breast Cancer                                                                                                                                                   | Biological: HER-2/neu peptide vaccine Procedure: leukapheresis Biological: ex vivo-expanded HER2-specific T cells Drug: cyclophosphamide Biological: sargramostim Other: laboratory biomarker                                                                                                                                                                                                               | Evaluate Toxicity of Infusing HER2-specific T Cells as Assessed by National Cancer Institute (NCI) Common Terminology Criteria for Adverse Events (CTCAE) v3.0 Proportion of Patients Whose T Cells Persist at a Level the Same or Greater as the Level After the Final T Cell Infusion and Subsequent Booster Immunizations as Assessed by IFN-gamma (IFN-g) ELISPOT Development of CD4+ and CD8+ Epitope Spreading Response of Skeletal or Bone-only Disease by FDG-PET and According to European Organization for                                                                                                  | Phase 1 Phase 2 | 23  | Oct-08     | 25-May-17 |

|        |             |                                                                                                                                             |           |                                                                                                                                                                                |                                                                                                                                                                                                                                |                                                                                                                                                                                                                                                                                                                                                                                                                                                                                                                                                                                                                                                                                                                                                                                                                                                                               |                 |     |           |                |
|--------|-------------|---------------------------------------------------------------------------------------------------------------------------------------------|-----------|--------------------------------------------------------------------------------------------------------------------------------------------------------------------------------|--------------------------------------------------------------------------------------------------------------------------------------------------------------------------------------------------------------------------------|-------------------------------------------------------------------------------------------------------------------------------------------------------------------------------------------------------------------------------------------------------------------------------------------------------------------------------------------------------------------------------------------------------------------------------------------------------------------------------------------------------------------------------------------------------------------------------------------------------------------------------------------------------------------------------------------------------------------------------------------------------------------------------------------------------------------------------------------------------------------------------|-----------------|-----|-----------|----------------|
| GM-CSF | NCT00803569 | Vaccine Therapy in Stage II, III, or IV Epithelial Ovarian, Fallopian Tube, or Primary Peritoneal Cancers                                   | Completed | Fallopian Tube Cancer Ovarian Cancer Peritoneal Cavity Cancer                                                                                                                  | Biological: ALVAC(2)-NY-ESO-1(M)/TRICOM vaccine Biological: Sargramostim                                                                                                                                                       | Number of Patients With Treatment-emergent Adverse Events Number of Patients With Best Overall Tumor Response Median Progression-free Survival (PFS) Median Cancer Antigen 25 (CA-125) Values on Study Number of Patients With NY-ESO-1 and LAGE-1                                                                                                                                                                                                                                                                                                                                                                                                                                                                                                                                                                                                                            | Phase 1         | 13  | 14-Nov-08 | 15-Feb-19      |
| GM-CSF | NCT00820976 | Induction With or Without Granulocyte Colony-Stimulating Factor in AML Transplantation in                                                   | Completed | AML                                                                                                                                                                            | Drug: G-CSF                                                                                                                                                                                                                    | response to induction overall survival                                                                                                                                                                                                                                                                                                                                                                                                                                                                                                                                                                                                                                                                                                                                                                                                                                        | Phase 3         | 260 | Mar-96    | 12-Jan-09      |
| GM-CSF | NCT00821249 | A Study of ARRY-520 in Patients With Relapsed or Refractory Multiple Myeloma                                                                | Completed | Multiple Myeloma Plasma Cell Leukemia                                                                                                                                          | Drug: ARRY-520, KSP(Eg5) inhibitor; intravenous Drug: Filgrastim, granulocyte-colony stimulating factor (G-CSF); subcutaneous Drug: Dexamethasone, steroid; oral                                                               | Establish the maximum tolerated dose (MTD) of study drug, with and without G-CSF. Assess the efficacy of the study drug, with and without dexamethasone, in terms of response rate. Characterize the safety profile of the study drug in combination with dexamethasone in terms of adverse events, clinical laboratory tests and electrocardiograms. Characterize the pharmacokinetics of the study drug. Assess the efficacy of the study drug in terms of response rate, duration of response, progression-free survival, treatment-free survival and time to next treatment. Characterize the safety profile of the study drug in terms of adverse events, clinical laboratory tests and electrocardiograms. Assess the efficacy of the study drug, with and without dexamethasone, in terms of duration of response, progression-free survival, treatment-free survival. | Phase 1 Phase 2 | 55  | Jan-09    | 19-May-16      |
| GM-CSF | NCT00822770 | Plerixafor and Granulocyte Colony-stimulating Factor (G-CSF) With Busulfan, Fludarabine and Thymoglobulin                                   | Completed | Stem Cell Transplantation Leukemia                                                                                                                                             | Drug: Plerixafor Drug: Filgrastim Drug: Fludarabine Drug: Busulfan Procedure: Allogeneic blood stem cell transplant Drug: ATG (Thymoglobulin)                                                                                  | Maximum Tolerated Dose (MTD) Plerixafor Time to Failure Response Rate (Engraftment Versus Graft Failure)                                                                                                                                                                                                                                                                                                                                                                                                                                                                                                                                                                                                                                                                                                                                                                      | Phase 3         | 47  | Jan-09    | 16-Jul-14      |
| GM-CSF | NCT00834665 | Phase III Clinical Trial Combining hTERT Tumor Vaccine & Autologous T Cells in Patients With Advanced                                       | Completed | Multiple Myeloma                                                                                                                                                               | Biological: hTERT vaccine, GM-CSF, PCV, T cell infusion Biological: GM-CSF, PCV, T cell infusion                                                                                                                               | Primary toxicity endpoint                                                                                                                                                                                                                                                                                                                                                                                                                                                                                                                                                                                                                                                                                                                                                                                                                                                     | Phase 1         | 59  | Dec-06    | 23-Oct-19      |
| GM-CSF | NCT00841399 | Safety and Efficacy Study of HER2/Neu (E75) Vaccine in Node-Positive Breast Cancer Patients                                                 | Completed | Breast Cancer                                                                                                                                                                  | Biological: E75 + GM-CSF vaccine                                                                                                                                                                                               | The primary endpoints are the safety and optimal dosing of the vaccine to induce an in vivo peptide-specific immune response. The clinical endpoint is time to disease recurrence.                                                                                                                                                                                                                                                                                                                                                                                                                                                                                                                                                                                                                                                                                            | Phase 1 Phase 2 | 100 | Jul-01    | 3-Jun-14       |
| GM-CSF | NCT00847171 | Trastuzumab, Cyclophosphamide, and Vaccine Therapy in Treating Patients With High-Risk or Metastatic Breast Cancer                          | Completed | Breast Cancer                                                                                                                                                                  | Biological: allogeneic GM-CSF-secreting breast cancer vaccine Biological: trastuzumab Drug: cyclophosphamide Other: flow cytometry Other: immunoenzyme technique Other: immunohistochemistry staining method Other: laboratory | Safety as Assessed by Number of Participants Experiencing Toxicity Number of Participants With Immunologic Response as Determined by Delayed-type Hypersensitivity (DTH) Response to HER2/Neu-derived Peptides Clinical Benefit as Assessed by Number of Participants With Progression-free Survival                                                                                                                                                                                                                                                                                                                                                                                                                                                                                                                                                                          | Phase 2         | 20  | Dec-08    | 26-Sep-18      |
| GM-CSF | NCT00849121 | Two-Arm Study of a DNA Vaccine Encoding Prostatic Acid Phosphatase (PAP) in Patients With Non-Metastatic Castrate-Resistant Prostate Cancer | Completed | Prostate Cancer                                                                                                                                                                | Biological: pTVG-HP with rhGM-CSF                                                                                                                                                                                              | Number of Participants With > = Grade 2 Autoimmune Events or >=Toxicities at Least Possibly Related to pTVG-HP With GM-CSF Study Treatment. Number of Participants Who Experience at Least a 3-fold Higher PAP-specific T-cell Frequency or Proliferation Index at One Year Compared to Baseline. The Number of Participants Who Experience at Least a Two-fold Increase in the PSA Doubling Time During the Treatment Period. The Number of Participants Who Are Metastasis-free at One Year.                                                                                                                                                                                                                                                                                                                                                                                | Phase 2         | 17  | 16-Mar-09 | 21-Nov-19      |
| GM-CSF | NCT00849147 | Bone Marrow Transplant From Partially Matched Donors and Nonmyeloablative Conditioning for Blood Cancers (BMT CTN 0603)                     | Completed | Precursor B-Cell Lymphoblastic Leukemia-Lymphoma Leukemia, Myeloid, Acute Burkitt Lymphoma Lymphoma, B-Cell Lymphoma, Follicular Lymphoma, Large B-Cell, Diffuse               | Biological: Haploidentical Bone Marrow Transplantation Biological: GVHD prophylaxis                                                                                                                                            | Overall Survival at 180 Days From the Time of Transplant Neutrophil Recovery Primary Graft Failure Secondary Graft Failure Platelet Recovery Donor Cell Engraftment Acute Graft-versus-host Disease (GVHD) Chronic GVHD Progression-free Survival Treatment-related Mortality (TRM) Infections                                                                                                                                                                                                                                                                                                                                                                                                                                                                                                                                                                                | Phase 1 Phase 2 | 55  | Oct-08    | 22-Dec-17      |
| GM-CSF | NCT00850785 | Autologous Tumor DRibble Vaccine in Patients With Non-Small Cell Lung Cancer                                                                | Completed | Non Small Cell Lung Cancer                                                                                                                                                     | Biological: DRibble vaccine                                                                                                                                                                                                    | Vaccine-induced immune response as measured by in vitro immune monitoring and by the delayed-type hypersensitivity (DTH) testing to injections of autologous, unmodified tumor cells and to DRibbles. Tumor response (RECIST criteria)                                                                                                                                                                                                                                                                                                                                                                                                                                                                                                                                                                                                                                        | Phase 1         | 6   | Jan-09    | 27-Sep-16      |
| GM-CSF | NCT00854789 | Safety and Efficacy Study of HER2/Neu (E75) Vaccine in Breast                                                                               | Completed | Breast Cancer                                                                                                                                                                  | Biological: E75 + GM-CSF vaccine                                                                                                                                                                                               | The primary endpoints are the safety and optimal dosing of the vaccine to induce an in vivo peptide-specific immune response. Time to recurrence is measured as a secondary endpoint.                                                                                                                                                                                                                                                                                                                                                                                                                                                                                                                                                                                                                                                                                         | Phase 1 Phase 2 | 95  | Dec-02    | 3-Jun-14       |
| GM-CSF | NCT00880243 | Effect of Priming During Induction and Consolidations in Younger Acute Myeloid Leukemia (AML)                                               | Completed | Acute Myeloid Leukemia                                                                                                                                                         | Drug: GM-CSF                                                                                                                                                                                                                   | Assessing the potential value of the daily administration of GM-CSF during induction chemotherapy and post-induction for analyzing and comparing the arms with and without GM-CSF: EFS, % of CR, duration of remission, OS and toxicity of each treatment. Evaluate the effectiveness on DFS of a single course of consolidation using a very intensive sequential chemotherapy with mitoxantrone, AraC and etoposide feasible                                                                                                                                                                                                                                                                                                                                                                                                                                                | Phase 3         | 473 | Mar-99    | April 13, 2009 |
| GM-CSF | NCT00880815 | Fludarabine, Bendamustine, and Rituximab in Treating Participants With Lymphoid Cancers Undergoing Stem Cell Transplant                     | Completed | CD20 Positive Chronic Lymphocytic Leukemia Follicular Lymphoma Mantle Cell Lymphoma Marginal Zone Lymphoma Recurrent Diffuse Large B-Cell Lymphoma T-Cell Non-Hodgkin Lymphoma | Procedure: Allogeneic Hematopoietic Stem Cell Transplantation Biological: Anti-Thymocyte Globulin Drug: Bendamustine Biological: Filgrastim Drug: Fludarabine Drug: Methotrexate Biological: Rituximab Drug: Tacrolimus        | Maximum tolerated dose of bendamustine                                                                                                                                                                                                                                                                                                                                                                                                                                                                                                                                                                                                                                                                                                                                                                                                                                        | Phase 1         | 60  | 17-Feb-09 | 3-Jun-19       |
| GM-CSF | NCT00899821 | Microsphere-Delivered Cytokines in Increasing Tumor Response in Lymphocytes From Patients With Head and Neck Cancer                         | Completed | Head and Neck Cancer                                                                                                                                                           | Biological: aldesleukin Biological: recombinant interleukin-12 Biological: sargramostim Other: immunologic technique Procedure: biopsy                                                                                         | Local and sustained cytokine combinations in evaluating antitumor response in human peripheral blood lymphocytes obtained from patients with squamous cell carcinoma of the head and neck Vaccine potential in provoking or enhancing long-term systemic immunity against head and neck cancer Response rate                                                                                                                                                                                                                                                                                                                                                                                                                                                                                                                                                                  | Not Applicable  |     | Jun-00    | 9-Nov-12       |

|        |             |                                                                                                                                                                                                                                                                           |           |                                                                                                                                                                     |                                                                                                                                                                                                                                                                                                                                                                                                        |                                                                                                                                                                                                                                                                                                                                                                                                                                                           |                |     |           |                |
|--------|-------------|---------------------------------------------------------------------------------------------------------------------------------------------------------------------------------------------------------------------------------------------------------------------------|-----------|---------------------------------------------------------------------------------------------------------------------------------------------------------------------|--------------------------------------------------------------------------------------------------------------------------------------------------------------------------------------------------------------------------------------------------------------------------------------------------------------------------------------------------------------------------------------------------------|-----------------------------------------------------------------------------------------------------------------------------------------------------------------------------------------------------------------------------------------------------------------------------------------------------------------------------------------------------------------------------------------------------------------------------------------------------------|----------------|-----|-----------|----------------|
| GM-CSF | NCT00899847 | Phase 2 Study of Autologous Followed by Nonmyeloablative Allogeneic Transplantation Using TLI & ATG                                                                                                                                                                       | Completed | Transplantation, Homologous Transplantation, Autologous Multiple Myeloma Blood and Marrow Transplant (BMT)                                                          | Procedure: Autologous peripheral blood stem cells (auto-PBSC) transplantation Procedure: Allogeneic peripheral blood stem cells (allo-PBSC) transplantation Drug: Filgrastim Drug: Cyclophosphamide Drug: Melphalan Drug: Cyclosporine Radiation: Total lymphoid irradiation Biological: Rabbit anti-thymocyte globulin Drug: Mycophenolate Mofetil 250mg Drug: Solumedrol Drug: Diphenhydramine Drug: | Incidence of Graft Versus Host Disease (GvHD) Median Time to Engraftment After Auto-PBSC Transplant Median Time to Engraftment After Allo-PBSC Transplant Overall Response Rate (ORR) Complete Response Rate (CRR) Partial Response Rate (PRR) Event-free Survival (EFS) Overall Survival (OS)                                                                                                                                                            | Phase 3        | 9   | May-09    | 20-Oct-17      |
| GM-CSF | NCT00908141 | GM-CSF in Treating Patients With Relapsed Prostate Cancer                                                                                                                                                                                                                 | Completed | Prostate Cancer                                                                                                                                                     | Biological: sargramostim                                                                                                                                                                                                                                                                                                                                                                               | Prostate Specific Antigen (PSA) Response                                                                                                                                                                                                                                                                                                                                                                                                                  | Phase 2        | 17  | Jun-06    | 23-Aug-13      |
| GM-CSF | NCT00912418 | Pilot Study for the Evaluation of the Efficacy of Vaccination With Autologous Tumor Cells Plus Granulocyte-macrophage Colony-stimulating Factor (GM-CSF) - in - Adjuvant, Followed by Systemic Low-dose-interleukin-2 (IL-2) Administration, in Patients With High        | Completed | Melanoma                                                                                                                                                            | Biological: autologous tumor cells plus GM-CSF-in Adjuvant                                                                                                                                                                                                                                                                                                                                             | Cytotoxic T-cell response to autologous tumor (as measured by staining assay) Cytotoxic T-cell response to defined melanoma antigens. 1: Activation antigen expression by lymph node T-cells 2: Delayed-type hypersensitivity response to autologous tumor cells. 3: Antibody response to autologous tumor cells.                                                                                                                                         | Not Applicable | 14  | Jan-00    | 19-Jun-13      |
| GM-CSF | NCT00912574 | Evaluation of the Effects of Local Granulocyte-Macrophage Colony-Stimulating Factor (GM-CSF) in Adjuvant Administration on Dendritic Cells in Skin of Melanoma Patients and in Sentinel Lymph Nodes:                                                                      | Completed | Melanoma                                                                                                                                                            | Drug: GM-CSF-in-adjuvant Drug: Montanide ISA-51 Biological: GM-CSF and Montanide ISA-51 Drug: Saline                                                                                                                                                                                                                                                                                                   | Number of dendritic cells (total and mature) accumulating in the dermis after administration of the adjuvant Proportion of the sentinel node occupied by dendritic cells (total and mature) Time to maximal dendritic cell infiltration into the dermis                                                                                                                                                                                                   | Not Applicable | 29  | Jun-04    | 3-Jun-09       |
| GM-CSF | NCT00923910 | Wilm's Tumor 1 Protein Vaccine to Treat Cancers of the Blood                                                                                                                                                                                                              | Completed | Leukemia, Acute Myelogenous (AML) Leukemia, Acute Lymphocytic (ALL) Leukemia, Chronic Myelogenous (CML) Myelodysplastic Syndrome (MDS) Non-Hodgkin's Lymphoma (NHL) | Drug: WT1 Peptide-Pulsed Dendritic Cells Drug: Donor Lymphocytes Drug: IL-4 Drug: KLH Drug: WT1 Peptides Drug: Endotoxin Drug: Diphenhydramine Drug:                                                                                                                                                                                                                                                   | Toxicity Number of Participants With Graft Versus Host Disease (GVHD) Greater Than or Equal to Grade 3 Time to Immune Response Wilm's Tumor 1 (WT1) Enzyme-Linked Immunospot (ELISpot) Wilm's Tumor (WT1) Delayed-type Hypersensitivity (DTH) Keyhole Limpet Hemocyanin (KLH) Delayed-type Hypersensitivity (DTH) Number of Participants                                                                                                                  | Phase 1        | 10  | 22-Feb-08 | April 12, 2017 |
| GM-CSF | NCT00925873 | GOELAMS SA4 Study: the Role of Fludarabine in the Treatment of Acute Myeloid Leukemia in the                                                                                                                                                                              | Completed | Acute Myeloid Leukemia                                                                                                                                              | Drug: Active comparator (no fludarabine) Drug: Experimental (fludarabine)                                                                                                                                                                                                                                                                                                                              | Event-free survival (EFS) evaluation of the CR rate, remission duration disease-free survival (DFS) overall survival (OS),                                                                                                                                                                                                                                                                                                                                | Phase 3        | 303 | Jun-96    | 22-Jun-09      |
| GM-CSF | NCT00928902 | Trial for the Evaluation of the Effect of Systemic Low-dose Interleukin-2 (IL-2) on the Immunogenicity of a Vaccine Comprising Synthetic Melanoma Peptides Administered With Granulocyte-macrophage Colony-stimulating Factor (GM-CSF)-In-Adjuvant, in Patients With High | Completed | Melanoma                                                                                                                                                            | Drug: low-dose IL-2 Biological: melanoma vaccine                                                                                                                                                                                                                                                                                                                                                       | To evaluate the effect of systemic low-dose IL-2 on the immunogenicity of a vaccine comprising synthetic melanoma peptides plus GM-CSF-in-adjuvant. Changes in disease, analysis of melanoma antigen (gp100, tyrosinase, MART-1) expression on melanoma cells from metastatic sites, Vitiligo.                                                                                                                                                            | Phase 2        | 41  | Nov-99    | 21-Oct-10      |
| GM-CSF | NCT00938223 | Evaluation of the Immunogenicity of Vaccination With Multiple Synthetic Melanoma Peptides With Granulocyte-macrophage Colony-stimulating Factor (GM-CSF)-In-Adjuvant, in Patients With Advanced                                                                           | Completed | Melanoma                                                                                                                                                            | Biological: 4-peptide and 12-peptide melanoma vaccines                                                                                                                                                                                                                                                                                                                                                 | Safety of the 12-peptide mixture and cumulative number of T cells derived from the sentinel immunized node that are reactive to the 12 melanoma peptides included in the vaccine, in the context of HLA-A1, -A2, or -A3. Immunogenicity of the individual peptides incorporated into the vaccine, cytotoxic and proliferative responses of T-cells to autologous and allogeneic melanoma cells. Disease-free survival of stage IIB and stage III patients | Phase 2        | 51  | Aug-00    | 2-May-18       |
| GM-CSF | NCT00939510 | Lenalidomide and GM-CSF in Treating Patients With Prostate                                                                                                                                                                                                                | Completed | Prostate Cancer                                                                                                                                                     | Biological: sargramostim Drug: lenalidomide Other: laboratory biomarker                                                                                                                                                                                                                                                                                                                                | Number of Patients With a PSA Response RECIST-defined Measurable Disease Number of Patients With Statistically Significant Change in Immune Response From Baseline to                                                                                                                                                                                                                                                                                     | Phase 1 Phase  | 32  | Jul-05    | 31-Jan-13      |
| GM-CSF | NCT00940342 | Rituximab Plus Sargramostim (GM-CSF) In Patients With Chronic Lymphocytic Leukemia                                                                                                                                                                                        | Completed | Leukemia                                                                                                                                                            | Drug: GM-CSF (Sargramostim) Drug: Rituximab                                                                                                                                                                                                                                                                                                                                                            | Overall Response Rate                                                                                                                                                                                                                                                                                                                                                                                                                                     | Phase 2        | 130 | 12-Oct-04 | 19-Sep-18      |
| GM-CSF | NCT00943943 | Granulocyte-colony Stimulating Factor (G-CSF) and Plerixafor Plus Sorafenib for Acute Myelogenous Leukemia (AML) With FLT3                                                                                                                                                | Completed | Acute Myelogenous Leukemia Leukemia                                                                                                                                 | Drug: G-CSF Drug: Plerixafor Drug: Sorafenib                                                                                                                                                                                                                                                                                                                                                           | Maximum Tolerated Dose (MTD) of Sorafenib                                                                                                                                                                                                                                                                                                                                                                                                                 | Phase 1        | 33  | 29-Oct-10 | 29-Mar-17      |
| GM-CSF | NCT00948480 | Vaccine Biotherapy of Cancer: Autologous Tumor Cells and                                                                                                                                                                                                                  | Completed | Metastatic Melanoma                                                                                                                                                 | Biological: Autologous tumor cells plus dendritic cells Drug: GM-CSF                                                                                                                                                                                                                                                                                                                                   | event-free survival [death or disease progression] Overall survival                                                                                                                                                                                                                                                                                                                                                                                       | Phase 2        | 56  | Oct-00    | 15-Jul-16      |
| GM-CSF | NCT00948922 | Melphalan+Bortezomib as a Conditioning Regimen for Autologous and Allogeneic Stem Cell Transplants in Multiple Myeloma                                                                                                                                                    | Completed | Multiple Myeloma                                                                                                                                                    | Drug: Bortezomib Drug: Melphalan Procedure: Autologous Stem Cell Transplant Drug: Fludarabine Procedure: Allogeneic Stem                                                                                                                                                                                                                                                                               | Progression Free Survival (PFS) Overall Survival (OS) Rate Molecular Complete Response (CR) Rates in Patients With Multiple Myeloma                                                                                                                                                                                                                                                                                                                       | Phase 3        | 124 | 18-Jun-09 | 18-Sep-19      |
| GM-CSF | NCT00952237 | Immune Mobilization of Autologous Peripheral Blood Stem Cells Using Interleukin-2 and GM-CSF                                                                                                                                                                              | Completed | Non-Hodgkin's Lymphoma Hodgkin's Disease Multiple Myeloma Other Plasma Cell Dyscrasia (Waldenstrom, Amyloidosis) Leukemia                                           | Drug: GM-CSF Drug: IL-2                                                                                                                                                                                                                                                                                                                                                                                | Can IL-2 be administered with GM-CSF to efficiently mobilize autologous peripheral blood stem cells. This study will determine the maximum tolerated dose of IL-2 and the optimal biological dose with GM-CSF for stem cell mobilization. Will immune-mobilized stem cell products be well tolerated once infused into patients and will engraft normally following                                                                                       | Phase 1        | 13  | Jan-03    | April 25, 2018 |



|        |             |                                                                                                                                                        |           |                                                                                                                                             |                                                                                                                                                                                                                                                                                 |                                                                                                                                                                                                                                                                                                                                                                                                                                                                                                                                                                                                                                                                                                                                                                                                                                                                                                                                                                     |                 |     |            |            |     |
|--------|-------------|--------------------------------------------------------------------------------------------------------------------------------------------------------|-----------|---------------------------------------------------------------------------------------------------------------------------------------------|---------------------------------------------------------------------------------------------------------------------------------------------------------------------------------------------------------------------------------------------------------------------------------|---------------------------------------------------------------------------------------------------------------------------------------------------------------------------------------------------------------------------------------------------------------------------------------------------------------------------------------------------------------------------------------------------------------------------------------------------------------------------------------------------------------------------------------------------------------------------------------------------------------------------------------------------------------------------------------------------------------------------------------------------------------------------------------------------------------------------------------------------------------------------------------------------------------------------------------------------------------------|-----------------|-----|------------|------------|-----|
| GM-CSF | NCT00958256 | Study of Bortezomib in Combination With Cyclophosphamide and                                                                                           | Completed | Mantle Cell Lymphoma Lymphoma                                                                                                               | Drug: Bortezomib Drug: Rituximab Drug: Cyclophosphamide Drug: Mesna Drug: G-Drug: Everolimus (RAD001) Drug: Cyclophosphamide Drug: Vincristine Drug: Doxorubicin Drug: Dexamethasone Drug: Mesna Drug: Methotrexate Drug: Ara-C (Cytarabine) Drug: Methylprednisone Drug: G-CSF | Response Rate                                                                                                                                                                                                                                                                                                                                                                                                                                                                                                                                                                                                                                                                                                                                                                                                                                                                                                                                                       | Phase 2         | 22  | Aug-09     | April 2015 | 13. |
| GM-CSF | NCT00968253 | RAD001 Study in Treatment of Relapsed or Refractory Acute Lymphocytic Leukemia                                                                         | Completed | Leukemia Acute Lymphocytic Leukemia                                                                                                         | Drug: Cyclophosphamide Drug: Vincristine Drug: Doxorubicin Drug: Dexamethasone Drug: Mesna Drug: Methotrexate Drug: Ara-C (Cytarabine) Drug: Methylprednisone Drug: G-CSF                                                                                                       | Maximum Tolerated Dose [MTD] Determination by Number of Participants With Dose Limiting Toxicity (DLT) Overall Response Rate (OR) Where OR = CR + CRp + CRi Participant Responses by Daily Dose Level Assignment (RAD001 5 mg, 10 mg and MTD 5 mg)                                                                                                                                                                                                                                                                                                                                                                                                                                                                                                                                                                                                                                                                                                                  | Phase 2 Phase 3 | 24  | Nov-09     | 27-Feb-19  |     |
| GM-CSF | NCT00971737 | Cyclophosphamide and Vaccine Therapy With or Without Trastuzumab in Treating Patients With Metastatic Breast Cancer                                    | Completed | Breast Cancer                                                                                                                               | Biological: allogeneic GM-CSF-secreting breast cancer vaccine Biological: trastuzumab Drug: cyclophosphamide                                                                                                                                                                    | Toxicity as Assessed by Number of Grade 3 or 4 Adverse Events Clinical Benefit (CB) as Assessed by Progression Free Survival at Six Months HER-2/Neu-specific Immune Responses as Measured by Number of Participants With Positive for Delayed-type Hypersensitivity (DTH) Response Pharmacodynamics of Peripheral CD4+CD25+ Regulatory T Cells Immune Priming in In-vivo Vaccine-site Biopsies Enumeration of CD8+ T Cells Specific for hTERT by ELISPOT Characterization of the T-cell Memory Pool Pre                                                                                                                                                                                                                                                                                                                                                                                                                                                            | Phase 2         | 63  | Jul-09     | April 2019 | 24. |
| GM-CSF | NCT00972309 | A Pilot Study of Vaccination With Epitope-Enhanced TARP Peptide and TARP Peptide-Pulsed Dendritic Cells in the Treatment of Stage D0                   | Completed | Prostatic Neoplasms Prostate Specific Antigens                                                                                              | Biological: TARP peptide vaccine Biological: TARP dendritic cell vaccine                                                                                                                                                                                                        | Immunologic response rate to vaccination Determine the safety and toxicity of TARP vaccines                                                                                                                                                                                                                                                                                                                                                                                                                                                                                                                                                                                                                                                                                                                                                                                                                                                                         | Phase 1         | 41  | 25-May-09  | 6-Feb-20   |     |
| GM-CSF | NCT00998049 | Plerixafor in Treating Patients With Multiple Myeloma Previously Treated With Lenalidomide and Planning to Undergo Autologous Stem Cell                | Completed | Multiple Myeloma Refractory Multiple Myeloma Stage I Multiple Myeloma Stage II Multiple Myeloma Stage III Multiple Myeloma                  | Drug: plerixafor Drug: filgrastim                                                                                                                                                                                                                                               | Number of Patients Achieving 3 Million CD34 Cells/kg After 2 Days of Apheresis CD34 Yield on Day 1 CD34 Yield Day 2 Median Number of Days of Apheresis Time to Reach 6 Million CD34 Cells Rate of Failure to Mobilize                                                                                                                                                                                                                                                                                                                                                                                                                                                                                                                                                                                                                                                                                                                                               | Phase 2         | 40  | Dec-09     | 14-May-15  |     |
| GM-CSF | NCT01022255 | Autologous Vaccine for Follicular Lymphoma                                                                                                             | Completed | Lymphoma, Follicular                                                                                                                        | Biological: Autologous FL vaccine                                                                                                                                                                                                                                               | Proportion of patients with toxicities as assessed by the National Cancer Institute Common Terminology Criteria for Adverse Events (NCI/CTCAE) version 3.0 grade $\geq$ 3 to the magn CON generated idotype (Id) vaccine Assessment of humoral idotype-specific immune responses Assessment of cellular idotype-specific immune responses Long-term safety/tolerability as determined by the proportion of patients with toxicities as assessed by the FDA CBER Guidance for Industry Toxicity Grading Scale in Preventive Vaccine Clinical Trials and the NCI/CTCAE version 4.02 grade $\geq$ 3                                                                                                                                                                                                                                                                                                                                                                    | Phase 1         | 28  | Jan-10     | 30-Jan-14  |     |
| GM-CSF | NCT01025284 | A Study for Participants With Small-Cell Lung Cancer                                                                                                   | Completed | Small Cell Lung Cancer                                                                                                                      | Drug: LY2523355 Drug: Granulocyte colony-stimulating factor (G-CSF)                                                                                                                                                                                                             | Part A: Percentage of Participants Achieving an Overall Response (Overall Response Rate) Part B: Percentage of Participants Achieving a Best Response (Clinical Benefit Rate) Part A: Progression-Free Survival Part B: Progression-Free Survival Part A: Percentage of Participants Achieving a Best Response (Clinical Benefit Rate) Part B: Percentage of Participants Achieving an Overall Response (Overall Response Rate) Part A: Pharmacokinetics - Maximum Observed Plasma Concentration (Cmax) of LY2523355 and Its Metabolite (LSN2546307) Part B: Pharmacokinetics - Maximum Observed Plasma Concentration (Cmax) of LY2523355 Part A: Pharmacokinetics - Area Under the Plasma Concentration Versus Time Curve of LY2523355 From Time Zero to Infinity [AUC(0- $\infty$ )] Part B: Pharmacokinetics - Area Under the Plasma Concentration Versus Time Curve of LY2523355 From Time Zero to Infinity [AUC(0- $\infty$ )] Total Lung Cancer Symptom Scale | Phase 2         | 64  | Dec-09     | 17-Sep-19  |     |
| GM-CSF | NCT01041638 | Monoclonal Antibody Ch14.18, Sargramostim, Aldesleukin, and Isotretinoin After Autologous Stem Cell Transplant in Treating Patients With Neuroblastoma | Completed | Localized Resectable Neuroblastoma Localized Unresectable Neuroblastoma Regional Neuroblastoma Stage 4 Neuroblastoma Stage 4S Neuroblastoma | Biological: Aldesleukin Other: Diagnostic Laboratory Biomarker Analysis Biological: Dinutuximab Drug: Isotretinoin Biological: Sargramostim                                                                                                                                     | Percentage of Patients Who Experienced a Significant (CTC Grade 3-5) Nonhematologic Toxicity of Interest (Pain, Hypotension, Allergic Reactions, Capillary Leak Syndrome, or Fever) Event-free Survival (EFS) Overall Survival (OS)                                                                                                                                                                                                                                                                                                                                                                                                                                                                                                                                                                                                                                                                                                                                 | Phase 1         | 105 | Dec-09     | 8-May-19   |     |
| GM-CSF | NCT01061840 | Trial of Bi-shRNA-furin and Granulocyte Macrophage Colony Stimulating Factor (GM-CSF) Augmented Autologous Tumor Cell Vaccine for Advanced Cancer      | Completed | Ewings Sarcoma Non Small Cell Lung Cancer Liver Cancer                                                                                      | Biological: Vigil™                                                                                                                                                                                                                                                              | To determine safety following the administration of bi-shRNAfurin and GMCSF autologous tumor cell (Vigil™) vaccine in advanced solid tumor patients who have no acceptable form of standard therapy with curative intent. To determine time to progression. To evaluate the effect of Vigil™ vaccine on immune stimulation. To evaluate whether lower cell doses would activate ELISPOT responses and to compare durability of dose elicited responses.                                                                                                                                                                                                                                                                                                                                                                                                                                                                                                             | Phase 1         | 100 | Dec-09     | 20-Mar-19  |     |
| GM-CSF | NCT01074060 | Plerixafor and Filgrastim Following Cyclophosphamide for Stem Cell Mobilization in Patients With Multiple Myeloma                                      | Completed | Refractory Multiple Myeloma Stage I Multiple Myeloma Stage II Multiple Myeloma Stage III Multiple Myeloma                                   | Drug: plerixafor Biological: filgrastim Drug: cyclophosphamide Procedure: autologous hematopoietic stem cell transplantation Other: laboratory biomarker analysis                                                                                                               | To assess the MTD ( maximum tolerated dose) of IV plerixafor when given post cyclophosphamide and GCSF for stem cell priming.Dose limiting toxicity will be defined as any grade 3 or 4 nonhematologic toxicity. Tolerability and safety of PLERIXAFOR Frequency of collecting $5 \times 10^6$ or more CD34+ cells/kg in 2 or less apheresis days Percentage of plasma cells Completion of 100 days post-                                                                                                                                                                                                                                                                                                                                                                                                                                                                                                                                                           | Phase 1         | 18  | April 2010 | 15-Feb-13  |     |
| GM-CSF | NCT01081223 | Phase I/II Study To Test The Safety and Efficacy of TVI-Brain-1 As A Treatment For Recurrent Grade IV                                                  | Completed | Glioma High Grade Astrocytoma Glioblastoma Multiforme                                                                                       | Biological: Cancer vaccine plus immune adjuvant, plus activated white blood cells                                                                                                                                                                                               | Relative toxicity Progression free survival Immunogenicity Overall survival                                                                                                                                                                                                                                                                                                                                                                                                                                                                                                                                                                                                                                                                                                                                                                                                                                                                                         | Phase 1 Phase 2 | 14  | April 2010 | 6-Jun-13   |     |
| GM-CSF | NCT01097057 | Rituximab, Combination Chemotherapy, Filgrastim (G-CSF), and Plerixafor in Treating Patients With Non-Hodgkin Lymphoma Undergoing Mobilization of      | Completed | Non-Hodgkin Lymphoma                                                                                                                        | Drug: Carboplatin Drug: Etoposide Biological: Filgrastim Drug: Ifosfamide Procedure: Leukapheresis Drug: Plerixafor Biological: Rituximab                                                                                                                                       | Number of Patients to Mobilize $\geq 5 \times 10^6$ CD34 Cells/kg Autologous PBSC (Efficacy) Number of Patients Who Achieved $\geq 5 \times 10^6$ CD34 Cells/kg in $\leq 4$ Apheresis Days Number of Participants Requiring One or Two Apheresis Collection Days to Reach $\geq 5 \times 10^6$ CD34 Cells/kg Total Number of Participants Who Did Not Collect $\geq 5 \times 10^6$ CD34 Cells/kg in a Maximum of Four Apheresis Days                                                                                                                                                                                                                                                                                                                                                                                                                                                                                                                                | Phase 2         | 20  | 9-Nov-10   | 23-Jan-18  |     |

|        |             |                                                                                                                                                                                                 |           |                                                                                                                                                                                                                                                                                                                                                                                                                                                                                                                                                                                                                                                                                                                                                                                                                                                                                                                                           |                                                                                                                                                                                 |                                                                                                                                                                                                                                                                                                                                                                                                                                                                                                                                                                                                                                                                                                                                                                                                                                                                                                                                                                                                                                                                                                                                                                                                                                                                                                                                                                                                                                                                   |                 |     |            |           |
|--------|-------------|-------------------------------------------------------------------------------------------------------------------------------------------------------------------------------------------------|-----------|-------------------------------------------------------------------------------------------------------------------------------------------------------------------------------------------------------------------------------------------------------------------------------------------------------------------------------------------------------------------------------------------------------------------------------------------------------------------------------------------------------------------------------------------------------------------------------------------------------------------------------------------------------------------------------------------------------------------------------------------------------------------------------------------------------------------------------------------------------------------------------------------------------------------------------------------|---------------------------------------------------------------------------------------------------------------------------------------------------------------------------------|-------------------------------------------------------------------------------------------------------------------------------------------------------------------------------------------------------------------------------------------------------------------------------------------------------------------------------------------------------------------------------------------------------------------------------------------------------------------------------------------------------------------------------------------------------------------------------------------------------------------------------------------------------------------------------------------------------------------------------------------------------------------------------------------------------------------------------------------------------------------------------------------------------------------------------------------------------------------------------------------------------------------------------------------------------------------------------------------------------------------------------------------------------------------------------------------------------------------------------------------------------------------------------------------------------------------------------------------------------------------------------------------------------------------------------------------------------------------|-----------------|-----|------------|-----------|
| GM-CSF | NCT01101880 | Clofarabine, Cytarabine, and Filgrastim in Treating Patients With Newly Diagnosed Acute Myeloid Leukemia, Advanced Myelodysplastic Syndrome, and/or Advanced Myeloproliferative Neoplasm        | Completed | Adult Acute Myeloid Leukemia With 11q23 (MLL) Abnormalities Adult Acute Myeloid Leukemia With Del(5q) Adult Acute Myeloid Leukemia With Inv(16)(p13;q22) Adult Acute Myeloid Leukemia With t(15;17)(q22;q12) Adult Acute Myeloid Leukemia With t(16;16)(p13;q22) Adult Acute Myeloid Leukemia With t(8;21)(q22;q22) Chronic Myelomonocytic Leukemia de Novo Myelodysplastic Syndromes Refractory Anemia With Excess Blasts Untreated Adult Acute Myeloid Leukemia Myeloproliferative Neoplasm With 10% Blasts                                                                                                                                                                                                                                                                                                                                                                                                                             | Biological: filgrastim Drug: clofarabine Drug: cytarabine                                                                                                                       | Rates of Complete Remission and Complete Remission With Incomplete Recovery of Counts Duration of Remission Time to Progression Event Free Survival Treatment-related Mortality (TRM) Overall Survival                                                                                                                                                                                                                                                                                                                                                                                                                                                                                                                                                                                                                                                                                                                                                                                                                                                                                                                                                                                                                                                                                                                                                                                                                                                            | Phase 2         | 50  | Aug-10     | 19-Oct-17 |
| GM-CSF | NCT01107756 | A Clinical Trial of Patients With Solid Tumours Receiving Granulocyte Colony Stimulating Factor as Primary Prophylaxis for Chemotherapy-induced Neutropenia, in a Docetaxel Based Regimen       | Completed | Neoplasms (no Otherwise Specified)                                                                                                                                                                                                                                                                                                                                                                                                                                                                                                                                                                                                                                                                                                                                                                                                                                                                                                        | Drug: LENOGRASTIM (GRANOGYTE 34)                                                                                                                                                | Incidence and severity of neutropenia assessed by using the Common Terminology Criteria for Adverse Events (CTCAE) version 4. Incidence and severity of febrile neutropenia assessed by using the Common Terminology Criteria for Adverse Events (CTCAE) version 4 Incidence and severity of anaemia assessed by using the Common Terminology Criteria for Adverse Events (CTCAE) version 4 Incidence and severity of asthenia assessed by using the Common Terminology Criteria for Adverse Events (CTCAE) version 4 Incidence and severity of anorexia assessed by using the Common Terminology Criteria for Adverse Events (CTCAE) version 4 Incidence and severity of myalgia assessed by using the Common Terminology Criteria for Adverse Events (CTCAE) version 4 Incidence and severity of nail changes, including nail disorders assessed by using the Common Terminology Criteria for Adverse Events (CTCAE) version 4 Incidence and severity of oral mucositis assessed by using the Common Terminology Criteria for Adverse Events (CTCAE) version 4 Neutropenia/febrile neutropenia associated days in hospital Neutropenia/febrile neutropenia associated use of anti-infectives Incidence of chemotherapy dose reduction, withdrawals or treatment delays due to neutropenia or febrile neutropenia Infection with (or without) neutropenia Relationship between the incidence and severity of neutropenia and the different chemotherapy regimens | Phase 4         | 403 | Mar-10     | 5-Oct-12  |
| GM-CSF | NCT01110135 | Bendamustine Hydrochloride, Etoposide, Dexamethasone, and Filgrastim For Peripheral Blood Stem Cell Mobilization in Treating Patients With Refractory or Recurrent Lymphoma or Multiple Myeloma | Completed | Adult Nasal Type Extranodal NK/T-cell Lymphoma Anaplastic Large Cell Lymphoma Angioimmunoblastic T-cell Lymphoma Cutaneous B-cell Non-Hodgkin Lymphoma Extranodal Marginal Zone B-cell Lymphoma of Mucosa-associated Lymphoid Tissue Intraocular Lymphoma Nodal Marginal Zone B-cell Lymphoma Peripheral T-cell Lymphoma Recurrent Adult Burkitt Lymphoma Recurrent Adult Diffuse Large Cell Lymphoma Recurrent Adult Diffuse Mixed Cell Lymphoma Recurrent Adult Diffuse Small Cleaved Cell Lymphoma Recurrent Adult Grade III Lymphomatoid Granulomatosis Recurrent Adult Hodgkin Lymphoma Recurrent Adult Immunoblastic Large Cell Lymphoma Recurrent Adult Lymphoblastic Lymphoma Recurrent Adult T-cell Leukemia/Lymphoma Recurrent Cutaneous T-cell Non-Hodgkin Lymphoma Recurrent Grade 1 Follicular Lymphoma Recurrent Grade 2 Follicular Lymphoma Recurrent Grade 3 Follicular Lymphoma Recurrent Mantle Cell Lymphoma Recurrent | Drug: bendamustine hydrochloride Drug: dexamethasone Biological: filgrastim Procedure: leukapheresis Other: laboratory biomarker analysis Other: flow cytometry Drug: etoposide | Successful Mobilization and Collection of PBSCs                                                                                                                                                                                                                                                                                                                                                                                                                                                                                                                                                                                                                                                                                                                                                                                                                                                                                                                                                                                                                                                                                                                                                                                                                                                                                                                                                                                                                   | Phase 1 Phase 2 | 43  | Aug-10     | 24-May-17 |
| GM-CSF | NCT01158118 | Plerixafor and Sargramostim (GM-CSF) for Mobilization of Allogeneic Sibling Donors                                                                                                              | Completed | Leukemia, Myeloid, Acute Myelodysplastic Syndromes Lymphoma, Non-Hodgkin Hodgkin Disease Leukemia, Lymphocytic, Chronic, B-Cell Multiple Myeloma                                                                                                                                                                                                                                                                                                                                                                                                                                                                                                                                                                                                                                                                                                                                                                                          | Drug: Sargramostim Drug: Plerixafor                                                                                                                                             | Number of Donors Requiring a Second Collection to Obtain a Minimum CD34/Kg (2 x 10 <sup>6</sup> ) Necessary for Allogeneic Stem Cell Transplantation Proportion of Donors Who Experience Grade 3-4 Infusion Toxicity Number of Donors Who Mobilize ≥ 2x10 <sup>6</sup> CD34+ Cells/Kg Recipient Weight Safely Following One or Two Aphereses Percentage of Donors Who Reach 5x10 <sup>6</sup> CD34+ Cells/Kg Recipient Weight in 1 or 2 Aphereses Determine if Peripheral Blood Stem Cell Products Collected After Mobilization With IV Plerixafor Can be Used Safely for Hematopoietic Cell Transplantation in HLA-matched Recipients as Measured by Time to Neutrophil Engraftment (Recipient Only) Kinetics of Immune Reconstitution as Measured by Time to Neutrophil Engraftment (Recipient Only) Kinetics of Immune Reconstitution as Measured by Time to Platelet Engraftment (Recipient Only) Rate of Acute Graft vs. Host Disease (GvHD) (Recipient Only) Rate of Chronic Graft vs. Host Disease (GvHD) (Recipient Only) Transplant Related Tolerability of midostaurin + ATRA given with CLAG chemotherapy Dose limiting toxicity (DLT) of midostaurin + ATRA with CLAG chemotherapy Response Survival Toxicity profile of midostaurin + ATRA Pharmacokinetics of midostaurin                                                                                                                                                                           | Phase 2         | 48  | April 2011 | 5-Jun-17  |
| GM-CSF | NCT01161550 | Cladribine Based Induction Therapy With All-Trans Retinoic Acid and Midostaurin in Relapsed/Refractory                                                                                          | Completed | Leukemia, Myeloid, Acute                                                                                                                                                                                                                                                                                                                                                                                                                                                                                                                                                                                                                                                                                                                                                                                                                                                                                                                  | Drug: Granulocyte colony-stimulating factor (G-CSF) Drug: Cladribine Drug: Cytarabine Drug: All-Trans Retinoic Acid                                                             | Tolerability of midostaurin + ATRA given with CLAG chemotherapy Dose limiting toxicity (DLT) of midostaurin + ATRA with CLAG chemotherapy Response Survival Toxicity profile of midostaurin + ATRA Pharmacokinetics of midostaurin                                                                                                                                                                                                                                                                                                                                                                                                                                                                                                                                                                                                                                                                                                                                                                                                                                                                                                                                                                                                                                                                                                                                                                                                                                | Phase 1         | 11  | Nov-10     | 23-Jul-13 |

|        |             |                                                                                                                                                             |           |                                                                      |                                                                                                                                                                                                                                       |                                                                                                                                                                                                                                                                                                                                                                                                                                                                                                                                                                                                                                                                                                                                                                                                                                                                                                                                                                                                                                                                                                           |                 |    |            |                |
|--------|-------------|-------------------------------------------------------------------------------------------------------------------------------------------------------------|-----------|----------------------------------------------------------------------|---------------------------------------------------------------------------------------------------------------------------------------------------------------------------------------------------------------------------------------|-----------------------------------------------------------------------------------------------------------------------------------------------------------------------------------------------------------------------------------------------------------------------------------------------------------------------------------------------------------------------------------------------------------------------------------------------------------------------------------------------------------------------------------------------------------------------------------------------------------------------------------------------------------------------------------------------------------------------------------------------------------------------------------------------------------------------------------------------------------------------------------------------------------------------------------------------------------------------------------------------------------------------------------------------------------------------------------------------------------|-----------------|----|------------|----------------|
| GM-CSF | NCT01164475 | Evaluation of Approved Weight-Based Dose Compared to Fixed Dose of Plerixafor in Patients With Non-Hodgkin's Lymphoma (NHL) Weighing Less Than 70 Kilograms | Completed | Non-Hodgkin's Lymphoma                                               | Drug: Granulocyte-colony stimulating factor (G-CSF) Drug: Fixed Dose Plerixafor Drug: Weight-Based Plerixafor                                                                                                                         | Proportion of Patients Who Achieved at Least 5*10^6 Cluster of Differentiation 34+ (CD34+) Cells Per Kilogram (Cells/kg) Area Under the Concentration-time Curve From Time 0 to 10 Hours (AUC [0-10]) Proportion of Patients Who Achieved at Least 2*10^6 CD34+ Cells/kg in Less Than or Equal to 4 Days of Apheresis Median Number of Days of Apheresis to Collect at Least 2*10^6 CD34+ Cells/kg Median Number of Days of Apheresis to Collect at Least 5*10^6 CD34+ Cells/kg Total Number of CD34+ Cells/kg Collected Over up to 4 Aphereses Mean Fold Increase in Peripheral Blood CD34+ Cell Count Following Plerixafor Maximum Observed Plasma Concentration (C <sub>max</sub> ) Time to Determine the maximally-tolerated dose (MTD) and/or maximum-feasible dose (MFD) of JX-594 Determine the safety/toxicity of JX-594 administered by IT injection in this patient population Determine the JX-594 pharmacokinetics and pharmacodynamics over time following IT injection in this patient population Determine the immune response to JX-594 following IT injection in this patient population | Phase 1         | 61 | Oct-10     | 25-Feb-14      |
| GM-CSF | NCT01169584 | Safety Study of Recombinant Vaccinia Virus to Treat Refractory Solid Tumors in Pediatric Patients                                                           | Completed | Neuroblastoma Rhabdomyosarcoma Lymphoma Wilm's Tumor Ewing's Sarcoma | Drug: Recombinant Vaccinia GM-CSF; RAC VAC GM-CSF (JX-594)                                                                                                                                                                            | Determine the safety/toxicity of JX-594 administered by IT injection in this patient population Determine the JX-594 pharmacokinetics and pharmacodynamics over time following IT injection in this patient population Determine the immune response to JX-594 following IT injection in this patient population                                                                                                                                                                                                                                                                                                                                                                                                                                                                                                                                                                                                                                                                                                                                                                                          | Phase 1         | 6  | Aug-10     | 21-Jan-16      |
| GM-CSF | NCT01171651 | A Study of Recombinant Vaccinia Virus Prior to Sorafenib to Treat Unresectable Primary Hepatocellular                                                       | Completed | Carcinoma, Hepatocellular                                            | Drug: JX-594 followed by sorafenib                                                                                                                                                                                                    | Determine safety and tolerability of intravenous infusion of JX-594 followed by intratumoral injections with JX-594 prior to standard sorafenib therapy Determine Disease Control Rate (DCR) at 12 weeks Determine radiographic response rate Determine overall survival time                                                                                                                                                                                                                                                                                                                                                                                                                                                                                                                                                                                                                                                                                                                                                                                                                             | Phase 2         | 25 | Aug-09     | 20-Jan-16      |
| GM-CSF | NCT01176552 | Granulocyte-macrophage Colony-stimulating Factor, Interferon and Interleukin-2 as Adjuvant Treatment for Renal Cancer                                       | Completed | Renal Cell Carcinoma                                                 | Drug: GM-CSF, IFN alpha and IL-2                                                                                                                                                                                                      | Disease-free survival (DFS) Progression rate Overall survival (OS) Number of Participants with Adverse Events as a Measure of Safety and Tolerability                                                                                                                                                                                                                                                                                                                                                                                                                                                                                                                                                                                                                                                                                                                                                                                                                                                                                                                                                     | Phase 2         | 35 | May-04     | 24-Aug-10      |
| GM-CSF | NCT01183416 | High-Dose 3F8/GM-CSF Immunotherapy Plus 13-Cis-Retinoic Acid for Consolidation of First Remission After Myeloablative Therapy and Autologous Stem-Cell      | Completed | Neuroblastoma                                                        | Drug: 3F8 monoclonal antibody and 13-cis-Retinoic Acid                                                                                                                                                                                | Assess the Impact of High-dose 3F8/GM-CSF on Relapse-free Survival Apply Real-time Quantitative RT-PCR to Test the Hypothesis That the Minimal Residual Disease Content of Bone Marrow Monitor Safety of the High-dose Antibody Treatment                                                                                                                                                                                                                                                                                                                                                                                                                                                                                                                                                                                                                                                                                                                                                                                                                                                                 | Phase 2         | 4  | Aug-10     | 9-Oct-19       |
| GM-CSF | NCT01183429 | 3F8/GM-CSF Immunotherapy Plus 13-Cis-Retinoic Acid for Consolidation of First Remission After Non-Myeloablative Therapy in Patients With High-Risk          | Completed | Neuroblastoma                                                        | Drug: 3F8 and 13-cis-retinoic acid                                                                                                                                                                                                    | Assess the Impact of High-dose 3F8/GM-CSF Apply Real-time Quantitative RT-PCR Monitor Safety of the High-dose Antibody Treatment                                                                                                                                                                                                                                                                                                                                                                                                                                                                                                                                                                                                                                                                                                                                                                                                                                                                                                                                                                          | Phase 2         | 39 | 12-Aug-10  | 13-Aug-19      |
| GM-CSF | NCT01183897 | 3F8/GM-CSF Immunotherapy Plus 13-Cis-Retinoic Acid for Primary Refractory Neuroblastoma in Bone                                                             | Completed | Neuroblastoma                                                        | Biological: 3F8/GM-CSF Immunotherapy Plus 13-Cis-Retinoic                                                                                                                                                                             | Assess the Activity of High-dose 3F8/GM-CSF Apply Real-time Quantitative RT-PCR Monitor Safety of the High-dose Antibody Treatment                                                                                                                                                                                                                                                                                                                                                                                                                                                                                                                                                                                                                                                                                                                                                                                                                                                                                                                                                                        | Not Applicable  | 31 | 12-Aug-10  | 13-Aug-19      |
| GM-CSF | NCT01189383 | IL15 Dendritic Cell Vaccine for Patients With Resected Stage III (A, B or C) or Stage IV Melanoma                                                           | Completed | Malignant Melanoma Stage III Malignant Melanoma Stage IV             | Biological: IL15-DC Vaccine                                                                                                                                                                                                           | Immune response Quality of elicited melanoma specific CD8+ T cells Breadth of melanoma specific immunity Longevity of melanoma specific CD8+ T cell immunity                                                                                                                                                                                                                                                                                                                                                                                                                                                                                                                                                                                                                                                                                                                                                                                                                                                                                                                                              | Phase 1 Phase 2 | 20 | Jan-11     | 22-Dec-16      |
| GM-CSF | NCT0122221  | Vaccine Therapy, Temozolomide, and Radiation Therapy in Treating Patients With Newly Diagnosed Glioblastoma Multiforme                                      | Completed | Brain and Central Nervous System Tumors                              | Biological: glioblastoma multiforme multipptide vaccine IMA950 Biological: sargramostim Drug: temozolomide Other: laboratory biomarker analysis Other: pharmacological study Procedure: adjuvant therapy Radiation: radiation therapy | Causality of each adverse event (AE) to glioblastoma multiform multi-antigen vaccine IMA950 and GM-CSF and AE severity according to NCI CTCAE Version 4.0 Total number of patients showing patient-individual T-cell responses against a single or multiple tumor-associated peptides (TUMAP) contained in the study vaccine IMA950 at one or more post-vaccination time points by HLA multimer analysis Progression-free survival (PSF) at 6 and 9 months post-surgery as assessed by the Macdonald criteria from conventional gadolinium-enhanced MRI and clinical assessment Correlation between steroid levels and observed T-cell responses Correlation between O6-methyl-DNA-methyltransferase (MGMT) promoter methylation status in tumor tissue using methylation-specific polymerase chain reaction and clinical benefit (PFS at 6 months and 9 months) Kinetics of vaccine-induced TUMAP responses including summary descriptions of the time of onset.                                                                                                                                         | Phase 1         | 45 | Jul-10     | 14-Oct-15      |
| GM-CSF | NCT01232712 | A Study to Assess the Safety and Efficacy of MUC1 Peptide Vaccine and hGM-CSF in Patients With MUC1-positive Tumor Malignancies                             | Completed | Multiple Myeloma                                                     | Biological: ImMucin, hGM-CSF                                                                                                                                                                                                          | Safety of intradermal or subcutaneous administration of the ImMucin peptide Assess efficacy of study treatment                                                                                                                                                                                                                                                                                                                                                                                                                                                                                                                                                                                                                                                                                                                                                                                                                                                                                                                                                                                            | Phase 1 Phase 2 | 15 | Sep-10     | 9-Aug-13       |
| GM-CSF | NCT01245673 | Combination Immunotherapy and Autologous Stem Cell Transplantation for Myeloma                                                                              | Completed | Myeloma                                                              | Biological: Plevnar Pneumococcal Conjugate Vaccine (PCV) Other: Activated/costimulated autologous T-cell Drug: Revlamid (Lenalidomide) Biological: MAGE-A3/GM-                                                                        | Primary Myeloma Endpoint                                                                                                                                                                                                                                                                                                                                                                                                                                                                                                                                                                                                                                                                                                                                                                                                                                                                                                                                                                                                                                                                                  | Phase 2         | 27 | April 2011 | 29-Jul-19      |
| GM-CSF | NCT01248923 | A Study of ARRY-520 and Bortezomib Plus Dexamethasone in Patients With Relapsed/Refractory Multiple Myeloma                                                 | Completed | Multiple Myeloma, Plasma Cell Leukemia                               | Drug: ARRY-520, KSP(Eg5) inhibitor; intravenous Drug: bortezomib, proteasome inhibitor; intravenous or subcutaneous Drug: Dexamethasone, steroid; oral Drug: Filgrastim, granulocyte-colony stimulating factor (G-CSF); subcutaneous  | Characterize the safety profile of the study drug in combination with bortezomib ± dexamethasone + G-CSF in terms of adverse events, clinical laboratory tests and electrocardiograms. Establish the maximum tolerated dose (MTD) of the study drug in combination with bortezomib ± dexamethasone + G-CSF. Assess the efficacy of study drug in combination with bortezomib ± dexamethasone + G-CSF in terms of best overall response Assess the efficacy of study drug in combination with bortezomib ± dexamethasone + G-CSF in terms of duration of response, time to progression, treatment-free interval and time to next treatment. Assess the pharmacokinetic (PK) drug interactions between ARRY-520 and bortezomib in terms of plasma concentration-time profiles.                                                                                                                                                                                                                                                                                                                              | Phase 1         | 55 | Dec-10     | April 22, 2016 |

|        |             |                                                                                                                                                      |           |                                                                                                                                                                                             |                                                                                                                                 |                                                                                                                                                                                                                                                                                                                                                        |                |      |           |                |
|--------|-------------|------------------------------------------------------------------------------------------------------------------------------------------------------|-----------|---------------------------------------------------------------------------------------------------------------------------------------------------------------------------------------------|---------------------------------------------------------------------------------------------------------------------------------|--------------------------------------------------------------------------------------------------------------------------------------------------------------------------------------------------------------------------------------------------------------------------------------------------------------------------------------------------------|----------------|------|-----------|----------------|
| GM-CSF | NCT01250470 | Vaccine Therapy and Sargramostim in Treating Patients With Malignant Glioma                                                                          | Completed | Anaplastic AstrocytomaAnaplastic OligoastrocytomaAnaplastic OligodendrogliomaGiant Cell GlioblastomaGlioblastomaGliosarcomaMixed GliomaRecurrent Brain Neoplasm                             | Other: Laboratory Biomarker AnalysisDrug: Montanide ISA-51/Survivin Peptide VaccineBiological: Sargramostim                     | Incidence of toxicity, assessed according to the National Cancer Institute Common Terminology Criteria for Adverse Events version 4Immune response, defined as a patient who has responded in either interferon gamma enzyme-linked immunosorbent spot (ELISPOT) or multimer assays                                                                    | Phase 1        | 9    | 5-Sep-12  | 27-Feb-17      |
| GM-CSF | NCT01265368 | A Clinical Study to Assess Safety and Efficacy of a Tumor Vaccine in Patients With Advanced Renal Cell Carcinoma (ASET)                              | Completed | Stage IV Renal Cell Cancer                                                                                                                                                                  | Biological: MGN1601                                                                                                             | Assessment of safety profile of MGN1601Assessment of potential autoimmune effects of MGN1601Assessment of the presence of MIDGE vectorsAssessment of the immune response to MGN1601Evaluation of clinical and radiological response to MGN1601                                                                                                         | Phase 1Phase 2 | 19   | Nov-10    | 15-Nov-18      |
| GM-CSF | NCT01265433 | WT-1 Analog Peptide Vaccine in Malignant Pleural Mesothelioma After Combined Modality Therapy                                                        | Completed | Malignant Pleural Mesothelioma                                                                                                                                                              | Biological: WT-1-vaccine Montanide + GM-CSFBiological: Montanide adjuvant + GM-CSF (This arm is closed)                         | To assess the 1-year progression free survival in patientsTo confirm the immunogenicity of the WT-1 analog peptide vaccineTo assess the utility of using the serum markeroverall survival                                                                                                                                                              | Phase 2        | 31   | 21-Dec-10 | 5-Nov-18       |
| GM-CSF | NCT01265901 | IMA901 in Patients Receiving Sunitinib for Advanced/Metastatic Renal Cell Carcinoma                                                                  | Completed | Metastatic Renal Cell Carcinoma                                                                                                                                                             | Drug: SunitinibBiological: GM-CSFDrug: CyclophosphamideDrug: IMA901                                                             | Overall survivalOverall survival in biomarker-defined subgroupProgression-free survivalBest tumor responseSafety and tolerabilityCellular immunomonitoring                                                                                                                                                                                             | Phase 3        | 339  | Dec-10    | 12-Oct-17      |
| GM-CSF | NCT01266447 | Veliparib, Topotecan Hydrochloride, and Filgrastim or Pegfilgrastim in Treating Patients With Persistent or Recurrent Cervical Cancer                | Completed | Cervical AdenocarcinomaCervical Adenosquamous CarcinomaCervical Small Cell CarcinomaCervical Squamous Cell CarcinomaRecurrent Cervical CarcinomaStage III Cervical CancerStage IVA Cervical | Biological: FilgrastimOther: Laboratory Biomarker AnalysisBiological: PegfilgrastimDrug: Topotecan HydrochlorideDrug: Veliparib | Tumor ResponseNumber of Patients With Dose-limiting Toxicities (in Safety lead-in)Adverse Events (Grade 3 or Higher) During Treatment PeriodProgression-free SurvivalOverall SurvivalDuration of Objective Response                                                                                                                                    | Phase 2        | 27   | Feb-11    | 8-Aug-19       |
| GM-CSF | NCT01285219 | A Study Comparing Pegylated Filgrastim and Filgrastim in Support for Chemotherapy                                                                    | Completed | Cancer                                                                                                                                                                                      | Drug: pegylated filgrastim and filgrastimDrug: filgrastim and pegylated filgrastim                                              | Protective rate of grade 4 neutropeniaRate of grade 3/4 neutropeniaTime to neutrophil recoveryIncidence of antibiotic administrationANC profileIncidence and severity adverse eventsIncidence and severity of side effectsChanges in clinical laboratory valuesIncidence of febrile neutropenia                                                        | Phase 3        | 337  | Jan-06    | 27-Jan-11      |
| GM-CSF | NCT01290692 | Study To Test the Safety and Efficacy of TVI-Brain-1 As A Treatment for Recurrent Grade IV Glioma                                                    | Completed | Grade IV GliomaGrade IV AstrocytomaGlioblastoma Multiforme                                                                                                                                  | Biological: TVI-Brain-1                                                                                                         | Progression Free SurvivalOverall SurvivalQuality of lifeToxicityTime to progressionObjective response rateCancer immunogenicity                                                                                                                                                                                                                        | Phase 2        | 86   | Jun-11    | 24-Oct-16      |
| GM-CSF | NCT01297543 | Safety Study of Human Myeloid Progenitor Cells (CLT-008) After Chemotherapy for Leukemia                                                             | Completed | Acute Myeloid LeukemiaAcute Lymphoblastic LeukemiaChronic Myeloid LeukemiaMyelodysplasia                                                                                                    | Biological: human myeloid progenitor cellsDrug: G-CSF                                                                           | Incidence of serious adverse reactionsDuration of neutropeniaDuration of thrombocytopeniaDuration of presence of CLT-008 derived cells in bloodDuration of presence of CLT-008 derived cells in bone marrowIncidence of mucositisIncidence of infectionsDuration of feverDuration of antibiotic useIncidence of hospitalizationDuration                | Phase 1Phase 2 | 45   | Mar-11    | 1-Jul-16       |
| GM-CSF | NCT01306890 | A Registry of Sipuleucel-T Therapy in Men With Advanced Prostate Cancer                                                                              | Completed | Advanced Prostate CancerProstatic Neoplasms                                                                                                                                                 | Biological: sipuleucel-T                                                                                                        | To Further Quantify the Risk of Cerebrovascular Events Following Sipuleucel-T Therapy for All SubjectsSurvival                                                                                                                                                                                                                                         |                | 1976 | 27-Jan-11 | 7-Jun-19       |
| GM-CSF | NCT01316822 | A Study of ARRY-382 in Patients With Selected Advanced or Metastatic Cancers                                                                         | Completed | Metastatic Cancer                                                                                                                                                                           | Drug: ARRY-382, cFMS inhibitor; oral                                                                                            | Characterize the safety profile of the study drug as determined by adverse events, clinical laboratory tests and electrocardiogramsEstablish the maximum tolerated dose (MTD) of study drugCharacterize the plasma pharmacokinetics (PK) of study drug and its metabolitesAssess the efficacy of study drug in terms of incidence of response rate and | Phase 1        | 26   | Mar-11    | 2-Jul-18       |
| GM-CSF | NCT01322490 | A Randomized, Double-blind, Phase 3 Efficacy Trial of PROSTVAC-V/F +/- GM-CSF in Men With Asymptomatic or Minimally Symptomatic Metastatic Castrate- | Completed | Prostate Cancer Metastatic                                                                                                                                                                  | Biological: PROSTVAC-VBiological: PROSTVAC-FDrug: GM-CSFOther: GM-CSF PlaceboBiological: Placebo                                | Overall SurvivalNumber of Subjects Alive Without Event at 6 Months                                                                                                                                                                                                                                                                                     | Phase 3        | 1297 | 28-Nov-11 | 4-Sep-19       |
| GM-CSF | NCT01324063 | A Randomized Phase III Study of Intensive Consolidation With High Dose Cytosine Arabinoside in Acute Myelogenous Leukemia (AML-8B)                   | Completed | Leukemia                                                                                                                                                                                    | Biological: sargramostimDrug: amasrineDrug: cytarabineDrug: daunorubicin hydrochlorideProcedure: quality-of-life assessment     | Disease-free survival and overall survival in patients who achieve complete remission after inductionToxicityQuality of lifeImproved therapeutic results as measured by activation of leukemic cells into the cell cycle and/or acceleration of hematopoietic recoveryRelative efficacy of autologous bone marrow therapy                              | Phase 3        | 160  | Nov-86    | 16-Jul-12      |
| GM-CSF | NCT01329900 | Chemotherapy Plus Ofatumumab Followed by G-CSF for Mobilization of Peripheral Blood Stem Cells in Patients With Non-Hodgkin's                        | Completed | Lymphoma                                                                                                                                                                                    | Drug: OfatumumabDrug: IfosfamideDrug: EtoposideDrug: MesnaDrug: G-CSFProcedure: Stem Cell Collection                            | Mobilization Rate                                                                                                                                                                                                                                                                                                                                      | Phase 2        | 50   | 22-Aug-11 | 13-Jan-20      |
| GM-CSF | NCT01331590 | Disrupting the Bone Marrow Microenvironment With G-CSF in Acute Lymphoblastic Leukemia                                                               | Completed | Precursor Cell Lymphoblastic Leukemia-Lymphoma                                                                                                                                              | Drug: G-CSFDrug: IfosfamideDrug: EtoposideDrug: DexamethasoneDrug: Mesna                                                        | Treatment-related mortalityDelayed hematologic recoveryComplete remission rate cytogenetic complete remissionOverall survivalDisease-free survivalRemission durationFrequency and severity of adverse eventsInteraction of pretreatment disease                                                                                                        | Early Phase 1  | 13   | Jul-11    | 20-Sep-16      |
| GM-CSF | NCT01334515 | Biological Therapy, Sargramostim, and Isotretinoin in Treating Patients With Relapsed or Refractory                                                  | Completed | Recurrent Neuroblastoma                                                                                                                                                                     | Biological: hu14.18-IL2 fusion proteinDrug: isotretinoinBiological: sargramostimOther: laboratory biomarker analysis            | Number of Patients With Unacceptable Dose Limiting Toxicities (DLTs)Overall Response Evaluated in This Study Using the New International Criteria Proposed by the Revised Response Evaluation Criteria in Solid Tumors (RECIST)                                                                                                                        | Phase 2        | 52   | Sep-11    | 21-Oct-19      |
| GM-CSF | NCT01342224 | Immunochemoradiotherapy in Patients With Pancreatic Cancer                                                                                           | Completed | Locally Advanced Pancreatic Adenocarcinoma                                                                                                                                                  | Biological: tadalafil and vaccination                                                                                           | SafetyImmune ResponseTumor Response                                                                                                                                                                                                                                                                                                                    | Phase 1        | 11   | Jan-11    | April 12, 2018 |
| GM-CSF | NCT01349569 | Allogeneic GM-CSF Vaccine and Lenalidomide in Treating Myeloma Patients With Near Complete                                                           | Completed | Multiple Myeloma                                                                                                                                                                            | Drug: LenalidomideBiological: Allogeneic Myeloma VaccineBiological: Pevnar-13                                                   | Response Conversion RateTime to ResponseEffect on Clonogenic Myeloma PrecursorsGrade 3-4 ToxicityTumor-specific Immunity as Assessed by Percentage of CD3+CSFSE-low/IFN-gamma+ Cells                                                                                                                                                                   | Not Applicable | 19   | Jan-12    | 15-Jan-19      |
| GM-CSF | NCT01368276 | An Extended Use Study of Safety and Efficacy of Talimogene Laherparepvec in Melanoma                                                                 | Completed | Melanoma                                                                                                                                                                                    | Biological: Talimogene Granulocyte Macrophage Colony-Stimulating Factor                                                         | Number of Participants With Treatment-emergent Adverse Events (AEs)Objective Response RateDurable Response Rate                                                                                                                                                                                                                                        | Phase 1Phase 2 | 31   | Oct-10    | 18-Dec-15      |
| GM-CSF | NCT01380600 | Safety Study of Recombinant Vaccinia Virus Administered Intravenously in Patients With Metastatic, Refractory Colorectal                             | Completed | Carcinoma, Colorectal                                                                                                                                                                       | Drug: Recombinant Vaccinia GM-CSF; RAC VAC GM-CSF (JX-594)                                                                      | Determine the maximally-tolerated dose (MTD) and/or maximum-feasible dose (MFD) of JX-594 administered by biweekly intravenous (IV) infusionDetermine the safety of JX-594 administered by biweekly IV infusionDetermine the pharmacokinetics, pharmacodynamics and immune response activity of JX-594Determine the anti-tumoral response of JX-594    | Phase 1        | 15   | Jul-10    | 8-Jan-16       |

|        |             |                                                                                                                          |           |                                                                                                                                        |                                                                                                                                                                           |                                                                                                                                                                                                                                                                                                                                                                                                                                            |                 |     |            |               |
|--------|-------------|--------------------------------------------------------------------------------------------------------------------------|-----------|----------------------------------------------------------------------------------------------------------------------------------------|---------------------------------------------------------------------------------------------------------------------------------------------------------------------------|--------------------------------------------------------------------------------------------------------------------------------------------------------------------------------------------------------------------------------------------------------------------------------------------------------------------------------------------------------------------------------------------------------------------------------------------|-----------------|-----|------------|---------------|
| GM-CSF | NCT01387555 | A Phase 2b Study of Modified Vaccinia Virus to Treat Patients With Advanced Liver Cancer Who Failed                      | Completed | Hepatocellular Carcinoma Liver Cancer HCC                                                                                              | Biological: JX-594 recombinant vaccinia GM-CSF Other: Best Supportive Care                                                                                                | Survival Time to Tumor Progression Quality of Life Tumor Response Safety profile of JX594 Time-to-symptomatic-progression                                                                                                                                                                                                                                                                                                                  | Phase 2         | 129 | Dec-08     | 11-Mar-15     |
| GM-CSF | NCT01394939 | Recombinant Vaccinia Virus Administered Intravenously in Patients With Metastatic, Refractory Colorectal Carcinoma       | Completed | Colorectal Carcinoma CRC                                                                                                               | Biological: JX-594 Drug: Irinotecan                                                                                                                                       | Determine the maximally-tolerated dose (MTD) or maximum feasible dose (MFD) of JX-594 administered by 5 IV infusions alone and in combination with irinotecan Determine the safety of JX-594 administered by 5 IV infusions followed by up to 3 IV JX-594 boosts alone and in combination with irinotecan Determine radiographic response rate of patients enrolled in the Phase 2a portion of the study Progression Free Disease Survival | Phase 1 Phase 2 | 52  | Jan-12     | 8-Jan-16      |
| GM-CSF | NCT01415713 | The Study of Metastatic Pancreatic Adenocarcinoma                                                                        | Completed | Metastatic Pancreatic Adenocarcinoma                                                                                                   | Drug: 1,Leucovorin,Oxaliplatin,Gemcitabine                                                                                                                                | to determine the following items in patients with metastatic pancreatic adenocarcinoma receiving SLOG to evaluate the following items in patients with metastatic pancreatic adenocarcinoma receiving SLOG treatment                                                                                                                                                                                                                       | Phase 1 Phase 2 | 73  | Mar-12     | 4-May-16      |
| GM-CSF | NCT01431391 | Sequencing of Sipuleucel-T and ADT in Men With Non-metastatic Prostate                                                   | Completed | Prostatic Neoplasm Prostate Cancer Prostatic Adenocarcinoma                                                                            | Biological: sipuleucel-T Drug: leuprolide acetate                                                                                                                         | Immune Response at Month 24 as Evaluated by IFN- $\gamma$ ELISPOT Specific for PA2024 Percentage of Participants With Immune Response As Evaluated by IFN- $\gamma$                                                                                                                                                                                                                                                                        | Phase 2         | 68  | Sep-11     | 30-May-17     |
| GM-CSF | NCT01433172 | Combination Immunotherapy of GM.CD40L Vaccine With CCL21 in Lung Cancer                                                  | Completed | Lung Cancer Adenocarcinoma                                                                                                             | Biological: Phase I - GM.CD40L.CCL21 Vaccinations Biological: Phase II - GM.CD40L cells Vaccinations Biological: Phase II - GM.CD40L.CCL21 Vaccinations                   | Phase I: Recommend Phase II Dose (RPDII) Phase II: Progression Free Survival (PFS) Response Rate                                                                                                                                                                                                                                                                                                                                           | Phase 1 Phase 2 | 73  | 26-Mar-12  | 6-Aug-19      |
| GM-CSF | NCT01435499 | Safety Study of a Melanoma Vaccine (GVAX) With or Without Cyclophosphamide in Patients With Surgically Resected Melanoma | Completed | Melanoma                                                                                                                               | Biological: melanoma GVAX Drug: Cyclophosphamide                                                                                                                          | Number of Participants with Adverse Events as a Measure of Safety and Tolerability of Administering Melanoma GVAX With and Without Cyclophosphamide In vitro correlates of anti-melanoma immunization                                                                                                                                                                                                                                      | Phase 1         | 21  | Sep-11     | 24-May-16     |
| GM-CSF | NCT01469611 | A Trial of JX-594 in Refractory Colorectal Carcinoma                                                                     | Completed | Colorectal Carcinoma                                                                                                                   | Biological: JX-594                                                                                                                                                        | Determine the maximally-tolerated dose Determine the maximum-feasible dose                                                                                                                                                                                                                                                                                                                                                                 | Phase 1         | 15  | Jul-10     | 17-Feb-17     |
| GM-CSF | NCT01477749 | Sipuleucel-T Manufacturing Demonstration Study                                                                           | Completed | Cancer of Prostate Cancer of the Prostate Neoplasms, Prostate Neoplasms, Prostatic Prostate Cancer Prostate Neoplasms Prostatic Cancer | Biological: sipuleucel-T                                                                                                                                                  | Cumulative CD54+ Cell Count Cumulative CD54 Upregulation Cumulative Total Nucleated Cell (TNC) Count Product Viability (Percentage)                                                                                                                                                                                                                                                                                                        | Phase 2         | 47  | Jun-12     | 9-Dec-15      |
| GM-CSF | NCT01479244 | Efficacy and Safety Study of NeuVax <sup>TM</sup> (Nelipepimut-S or E75) Vaccine to Prevent Breast Cancer Recurrence     | Completed | Breast Cancer With Low to Intermediate HER2 Expression                                                                                 | Biological: NeuVax <sup>TM</sup> vaccine Biological: Leukine <sup>®</sup> (sargramostim, GM-CSF) and water for injection                                                  | Comparison of DFS in vaccine treated patients and control patients Assessment of DFS and OS at 3, 5 and 10 years in vaccine and control groups, respectively; assessment of safety                                                                                                                                                                                                                                                         | Phase 3         | 758 | Nov-11     | 27-Feb-17     |
| GM-CSF | NCT01480479 | Phase III Study of Rindopepimut/GM-CSF in Patients With Newly Diagnosed Glioblastoma                                     | Completed | Glioblastoma Small Cell Glioblastoma Giant Cell Glioblastoma Gliosarcoma Glioblastoma Oligodendroglial Component                       | Drug: Rindopepimut (CDX-110) with GM-CSF Drug: Temozolomide Drug: KLV                                                                                                     | Overall Survival Progression-free survival Safety and Tolerability                                                                                                                                                                                                                                                                                                                                                                         | Phase 3         | 745 | Nov-11     | 16-Jan-18     |
| GM-CSF | NCT01481272 | Ofatumumab With IVAC Salvage Chemotherapy in Diffuse Large B Cell Lymphoma Patients                                      | Completed | Diffuse Large B Cell Lymphoma                                                                                                          | Drug: Ofatumumab Drug: Etoposide Drug: Ifosfamid Drug: Mesna Drug: Cytarabine Drug: Methotrexate Drug: Leukovorin Drug: Granulocyte-Colony                                | Response rate Progression-free survival Event-free survival Overall survival Number of participants with adverse events as a measure of safety and tolerability                                                                                                                                                                                                                                                                            | Phase 2         | 77  | Nov-11     | 17-Jul-17     |
| GM-CSF | NCT01487863 | Concurrent vs. Sequential Sipuleucel-T & Abiraterone Treatment in Men With Metastatic Castrate Resistant Prostate Cancer | Completed | Prostate Cancer Metastatic Hormone Refractory Prostate Cancer Castration-resistant Prostate Cancer                                     | Biological: sipuleucel-T Drug: abiraterone acetate                                                                                                                        | Cumulative CD54 Upregulation Ratio Between the Cohorts.                                                                                                                                                                                                                                                                                                                                                                                    | Phase 2         | 69  | Dec-11     | 19-Mar-19     |
| GM-CSF | NCT01498328 | A Study of Rindopepimut/GM-CSF in Patients With Relapsed EGFRVIII-Positive Glioblastoma                                  | Completed | Glioblastoma Small Cell Glioblastoma Giant Cell Glioblastoma Gliosarcoma Glioblastoma Oligodendroglial Component Recurrent             | Drug: Bevacizumab Drug: Rindopepimut (CDX-110) with GM-CSF Drug: KLV                                                                                                      | Groups 1 and 2: Progression-free survival rate Group 2C: Objective Response Rate Safety and Tolerability Anti-tumor activity EGFRVIII-specific immune response                                                                                                                                                                                                                                                                             | Phase 2         | 127 | Dec-11     | April 7, 2017 |
| GM-CSF | NCT01527422 | Cyclophosphamide, Doxorubicin, Vincristine, Prednisone, Rituximab Pateinets With Aggressive NHL                          | Completed | Lymphoma Non Hodgkin's Lymphoma                                                                                                        | Drug: Cyclophosphamide, Doxorubicin, Vincristine and Prednisone                                                                                                           | Phase I-II Study of Dose Dense of PEG-Filgrastim and GM-CSF combined with CHOP-R                                                                                                                                                                                                                                                                                                                                                           | Phase 1 Phase 2 | 60  | Jan-06     | 7-Feb-12      |
| GM-CSF | NCT01551745 | Salvage Ovarian FANG <sup>TM</sup> Vaccine + Bevacizumab                                                                 | Completed | Stage III Ovarian Cancer Stage IV Ovarian Cancer                                                                                       | Biological: Vigil <sup>TM</sup> Vaccine Drug: Bevacizumab                                                                                                                 | Time to Progression Response Rate Number of Alive Subjects Enzyme-Linked ImmunoSorbent Spot (ELISPOT)                                                                                                                                                                                                                                                                                                                                      | Phase 2         | 5   | Mar-12     | 7-Aug-19      |
| GM-CSF | NCT01570036 | Combination Immunotherapy With Herceptin and the HER2 Vaccine                                                            | Completed | Breast Cancer                                                                                                                          | Drug: Herceptin Drug: NeuVax vaccine Drug: GM-CSF                                                                                                                         | Disease-free survival (DFS) Cardiac toxicity Local and systemic toxicities                                                                                                                                                                                                                                                                                                                                                                 | Phase 2         | 275 | 21-May-13  | 14-Dec-18     |
| GM-CSF | NCT01576692 | Combination Chemotherapy, Monoclonal Antibody, and Natural Killer Cells in Treating Young Patients With Recurrent or     | Completed | Neuroblastoma                                                                                                                          | Biological: Humanized anti-GD2 antibody Drug: Chemotherapy Other: Cytokines Biological: Natural killer cells Device: ClinIMACS                                            | Number of patients experiencing unacceptable toxicity associated with humanized anti-GD2 antibody/chemotherapy (course 1) and anti-GD2 antibody/chemotherapy/NK cells (course 2) Response to treatment Time to progression Event free survival Overall survival                                                                                                                                                                            | Phase 1         | 34  | April 2012 | 15-Nov-18     |
| GM-CSF | NCT01580696 | Phase I/IIa Trial of Folate Binding Protein Vaccine in Ovarian Cancer                                                    | Completed | Ovarian Cancer Endometrial Cancer Fallopian Cancer Peritoneal Cancer                                                                   | Biological: E39 peptide (100mg)/GM-CSF vaccine Other: Non-vaccine clinically matched control group Biological: E39 peptide (500mg)/GM-CSF vaccine Biological: E39 peptide | Safety and Local/Systemic Toxicity Disease-free survival                                                                                                                                                                                                                                                                                                                                                                                   | Phase 1 Phase 2 | 51  | April 2012 | 7-May-18      |
| GM-CSF | NCT01589094 | Neoadjuvant Dose Dense Gemcitabine and Cisplatin (DD GC) In Patients With Muscle-Invasive                                | Completed | Bladder Cancer                                                                                                                         | Drug: Gemcitabine and Cisplatin (DD GC)                                                                                                                                   | Pathologic Response Rate Number of Participants With Toxicity 2 Year Recurrence Free Survival (RFS) Rate for Responders 2 Year Recurrence Free Survival (RFS) Rate for Nonresponders                                                                                                                                                                                                                                                       | Phase 2         | 51  | April 2012 | 2-Oct-19      |
| GM-CSF | NCT01636284 | A Phase 2a Study of Modified Vaccinia Virus to Treat Sorafenib-naive Advanced Liver Cancer                               | Completed | Hepatocellular Carinoma                                                                                                                | Biological: JX-594 recombinant vaccinia GM-CSF                                                                                                                            | Tumor response Safety profile of JX-594 Time to progression Overall survival                                                                                                                                                                                                                                                                                                                                                               | Phase 2         | 16  | Jun-12     | 20-Jan-16     |

|        |             |                                                                                                                                                                                           |           |                                                                                                                                                                                                                                                                                                                                                                                                                                                                                                                                                                                                                                                                                                                                                                                                                                                                                                                                                                                                                                                                                                                                                                                                                                                              |                                                                                                                                                                                                                                                                                                                                                                    |                                                                                                                                                                                                                                                                                                                                                                                                                                                                                                                                      |                 |    |            |           |
|--------|-------------|-------------------------------------------------------------------------------------------------------------------------------------------------------------------------------------------|-----------|--------------------------------------------------------------------------------------------------------------------------------------------------------------------------------------------------------------------------------------------------------------------------------------------------------------------------------------------------------------------------------------------------------------------------------------------------------------------------------------------------------------------------------------------------------------------------------------------------------------------------------------------------------------------------------------------------------------------------------------------------------------------------------------------------------------------------------------------------------------------------------------------------------------------------------------------------------------------------------------------------------------------------------------------------------------------------------------------------------------------------------------------------------------------------------------------------------------------------------------------------------------|--------------------------------------------------------------------------------------------------------------------------------------------------------------------------------------------------------------------------------------------------------------------------------------------------------------------------------------------------------------------|--------------------------------------------------------------------------------------------------------------------------------------------------------------------------------------------------------------------------------------------------------------------------------------------------------------------------------------------------------------------------------------------------------------------------------------------------------------------------------------------------------------------------------------|-----------------|----|------------|-----------|
| GM-CSF | NCT01649635 | Study of Cabazitaxel Combined With Prednisone and Prophylaxis of Neutropenia Complications in the Treatment of Patients With Metastatic Castration-resistant Prostate Cancer              | Completed | Prostate Cancer                                                                                                                                                                                                                                                                                                                                                                                                                                                                                                                                                                                                                                                                                                                                                                                                                                                                                                                                                                                                                                                                                                                                                                                                                                              | Drug: CABAZITAXEL (XRP6258) Drug: Prednisone Drug: Ciprofloxacin Drug: G-CSF (Granulocyte colony-stimulating factor)                                                                                                                                                                                                                                               | Proportion of patients with some episode of neutropenia classified as grade $\geq 3$  Proportion of patients with episode of neutropenia grade $\geq 3$  Rate of febrile neutropenia Rate of diarrhea grade $\geq 3$  PSA response rate Circulating Tumor Cells Count (CTC) rate Changes from baseline in score derived from the Functional assessment of cancer therapy-prostate (FACT-P) and the Trial Outcome Index (TOI) Number of patients with adverse events                                                                  | Phase 4         | 45 | Jul-12     | 6-Jul-16  |
| GM-CSF | NCT01673217 | Decitabine, Vaccine Therapy, and Pegylated Liposomal Doxorubicin Hydrochloride in Treating Patients With Recurrent Ovarian Epithelial Cancer, Fallopian Tube Cancer, or Peritoneal Cancer | Completed | Recurrent Fallopian Tube Cancer Recurrent Ovarian Epithelial Cancer Recurrent Primary Peritoneal Cavity Cancer                                                                                                                                                                                                                                                                                                                                                                                                                                                                                                                                                                                                                                                                                                                                                                                                                                                                                                                                                                                                                                                                                                                                               | Drug: decitabine Biological: NY-ESO-1 peptide vaccine Drug: pegylated liposomal doxorubicin hydrochloride Biological: sargramostim Biological: incomplete Freund's adjuvant Other: immunohistochemistry staining method Other: liquid chromatography Other: mass spectrometry Genetic: reverse transcriptase-polymerase chain reaction Other: laboratory biomarker | Toxicity as assessed by National Cancer Institute (NCI) Common Terminology Criteria for Adverse Events (CTCAE) v3.0 NY-ESO-1 specific cellular and humoral immunity as assessed by NY-ESO-1-specific CD8+ and CD4+ T cells and antibodies and frequency of CD4+ CD25+ FOXP3+ regulatory T cells NY-ESO-I expression using Q-RT-PCR and IHC Time to progression NY-ESO-I promoter DNA methylation using pyrosequencing Global genomic DNA methylation using liquid chromatography-mass spectrometry (LC-MS) and LINE-I pyrosequencing | Phase 1         | 18 | April 2009 | 13-Jan-14 |
| GM-CSF | NCT01682044 | Pegfilgrastim and Rituximab in Treating Patients With Untreated, Relapsed, or Refractory Follicular Lymphoma, Small Lymphocytic Lymphoma, or Marginal Zone Lymphoma                       | Completed | Contiguous Stage II Grade 1 Follicular Lymphoma Contiguous Stage II Grade 2 Follicular Lymphoma Contiguous Stage II Grade 3 Follicular Lymphoma Contiguous Stage II Marginal Zone Lymphoma Contiguous Stage II Small Lymphocytic Lymphoma Extranodal Marginal Zone B-cell Lymphoma of Mucosa-associated Lymphoid Tissue Nodal Marginal Zone B-cell Lymphoma Noncontiguous Stage II Grade 1 Follicular Lymphoma Noncontiguous Stage II Grade 2 Follicular Lymphoma Noncontiguous Stage II Grade 3 Follicular Lymphoma Noncontiguous Stage II Marginal Zone Lymphoma Noncontiguous Stage II Small Lymphocytic Lymphoma Recurrent Grade 1 Follicular Lymphoma Recurrent Grade 2 Follicular Lymphoma Recurrent Grade 3 Follicular Lymphoma Recurrent Marginal Zone Lymphoma Recurrent Small Lymphocytic Lymphoma Splenic Marginal Zone Lymphoma Stage I Grade 1 Follicular Lymphoma Stage I Grade 2 Follicular Lymphoma Stage I Grade 3 Follicular Lymphoma Stage I Marginal Zone Lymphoma Stage I Small Lymphocytic Lymphoma Stage III Grade 1 Follicular Lymphoma Stage III Grade 2 Follicular Lymphoma Stage III Grade 3 Follicular Lymphoma Stage III Marginal Zone Lymphoma Stage III Small Lymphocytic Lymphoma Stage IV Grade 1 Follicular Lymphoma Stage | Biological: pegfilgrastim Biological: rituximab Other: flow cytometry Procedure: biopsy Other: immunohistochemistry staining method Genetic: western blotting                                                                                                                                                                                                      | Number of Participants With Adverse Events Overall Response Rate Percent Change in Functional and Phenotypic Characteristics of Host Neutrophils From Baseline Percent Change in CD20 Antigen Expression and Density of Expression Percent Change in Serum Levels of Tumor Necrosis Factor (TNF) From Baseline Percent Change in Serum Levels of Interferon Alpha (INF) From Baseline Percent Change in Serum Levels of Free Radical Levels (MFI) From Baseline                                                                      | Phase 3         | 20 | April 2007 | 17-Oct-17 |
| GM-CSF | NCT01690507 | Decitabine Combining Modified CAG Followed by HLA Haploidentical Peripheral Blood Mononuclear Cells Infusion for Elderly Patients With Acute Myeloid Leukemia(AML)                        | Completed | MDS AML                                                                                                                                                                                                                                                                                                                                                                                                                                                                                                                                                                                                                                                                                                                                                                                                                                                                                                                                                                                                                                                                                                                                                                                                                                                      | Drug: Decitabine Drug: Cytarabine Drug: aclacinomycin Drug: Granulocyte colony-stimulating factor Other: HLA haploidentical mononuclear cells infusion                                                                                                                                                                                                             | CR rate overall survival                                                                                                                                                                                                                                                                                                                                                                                                                                                                                                             | Phase 1 Phase 2 | 29 | Nov-12     | 25-Feb-16 |
| GM-CSF | NCT01696877 | A Neoadjuvant Study of Androgen Ablation Combined With Cyclophosphamide and GVAX Vaccine for Localized Prostate Cancer                                                                    | Completed | Prostate Cancer Adenocarcinoma in Situ                                                                                                                                                                                                                                                                                                                                                                                                                                                                                                                                                                                                                                                                                                                                                                                                                                                                                                                                                                                                                                                                                                                                                                                                                       | Drug: degarelix acetate Drug: Cyclophosphamide Drug: GVAX                                                                                                                                                                                                                                                                                                          | Intraprostatic CD8+ T Cell Infiltration Intraprostatic CD4+ T Cell and Treg Infiltration Quantification of Tissue Androgen Concentrations Quantification of Markers of Apoptosis Pathological Complete Responses Serum Antibodies to Prostate-associated Antigens Prostate-specific Antigen Response Rate Percentage of Participants Without Prostate Specific Antigen Recurrence at 24 Months After Surgery                                                                                                                         | Phase 1 Phase 2 | 29 | 18-Jan-13  | 28-Mar-19 |
| GM-CSF | NCT01707004 | Decitabine and Total-Body Irradiation Followed By Donor Bone Marrow Transplant and Cyclophosphamide in Treating Patients With Relapsed or Refractory Acute Myeloid Leukemia               | Completed | Acute Myeloid Leukemia With Multilineage Dysplasia Following Myelodysplastic Syndrome Adult Acute Myeloid Leukemia in Remission Adult Acute Myeloid Leukemia With 11q23 (MLL) Abnormalities Adult Acute Myeloid Leukemia With Del(5q) Adult Acute Myeloid Leukemia With Inv(16)(p13;q22) Adult Acute Myeloid Leukemia With t(15;17)(q22;q12) Adult Acute Myeloid Leukemia With t(16;16)(p13;q22) Adult Acute Myeloid Leukemia With t(8;21)(q22;q22) de Novo Myelodysplastic Syndromes Previously Treated Myelodysplastic Syndromes Recurrent Adult Acute Myeloid                                                                                                                                                                                                                                                                                                                                                                                                                                                                                                                                                                                                                                                                                             | Drug: decitabine Drug: fludarabine phosphate Drug: busulfan Drug: cyclophosphamide Drug: tacrolimus Drug: mycophenolate mofetil Biological: filgrastim Radiation: total-body irradiation Procedure: allogeneic bone marrow transplantation Other: laboratory biomarker analysis                                                                                    | Overall Survival (OS) Time to Neutrophil Recovery Percentage of Participants With Platelet Recovery by Day 30 Number of Participants With Primary Graft Failure Cumulative Incidence of Grade III-IV Acute GVHD Cumulative Incidence of Chronic GVHD According to BMTCTN Number of Participants With Complete Remission After Transplantation Progression Free Survival                                                                                                                                                              | Phase 3         | 20 | 16-May-13  | 21-Nov-19 |

|        |             |                                                                                                                                                                                                                     |           |                                                                                                                               |                                                                                                                                                                                                                                       |                                                                                                                                                                                                                                                                                                                                                                                                                                                                                                                                                                                                                                                                                                                                                                                                                                                                                                                                                                                                                                                                                       |                |     |            |           |
|--------|-------------|---------------------------------------------------------------------------------------------------------------------------------------------------------------------------------------------------------------------|-----------|-------------------------------------------------------------------------------------------------------------------------------|---------------------------------------------------------------------------------------------------------------------------------------------------------------------------------------------------------------------------------------|---------------------------------------------------------------------------------------------------------------------------------------------------------------------------------------------------------------------------------------------------------------------------------------------------------------------------------------------------------------------------------------------------------------------------------------------------------------------------------------------------------------------------------------------------------------------------------------------------------------------------------------------------------------------------------------------------------------------------------------------------------------------------------------------------------------------------------------------------------------------------------------------------------------------------------------------------------------------------------------------------------------------------------------------------------------------------------------|----------------|-----|------------|-----------|
| GM-CSF | NCT01731886 | Lenalidomide and Dexamethasone With/Without Stem Cell Transplant in Patients With Multiple Myeloma                                                                                                                  | Completed | Multiple Myeloma                                                                                                              | Procedure: Autologous peripheral blood stem cell transplant Drug: Lenalidomide Drug: Dexamethasone Procedure: Stem cell collection Drug: Melphalan Drug: G-                                                                           | Complete Response Rate Overall Survival Rate (OS) Progression Free Survival (PFS)                                                                                                                                                                                                                                                                                                                                                                                                                                                                                                                                                                                                                                                                                                                                                                                                                                                                                                                                                                                                     | Phase 2        | 60  | Sep-12     | 5-Feb-20  |
| GM-CSF | NCT01735175 | Phase III Study Comparing the Efficacy and Safety of LA-EP2006 and Neulasta®                                                                                                                                        | Completed | Neutropenic Complications Breast Neoplasms Chemotherapy-induced Neutropenia Chemotherapeutic Toxicity                         | Drug: LA-EP2006 Drug: Neulasta®                                                                                                                                                                                                       | Mean Duration of Severe Neutropenia (DSN) During Cycle 1 of Chemotherapy Incidence of Febrile Neutropenia (FN) Number of Patients With at Least One Episode of Fever by Cycle and Across All Cycles Depth of ANC Nadir in Cycle 1 Number of Patients With ANC Nadir Per Day in Cycle 1 Time to ANC Recovery in Days in Cycle 1 Frequency of Infections by Cycle and Across All Cycles Mortality Due to Infection                                                                                                                                                                                                                                                                                                                                                                                                                                                                                                                                                                                                                                                                      | Phase 2        | 316 | Jun-12     | 7-Aug-17  |
| GM-CSF | NCT01753453 | An Exploratory Safety Study to Investigate the Extent of Tumor Cell Mobilization (TCM) After Use of G-CSF Alone or G-CSF Plus Plerixafor in Multiple Myeloma (MM) Patients Who May be Poor Mobilizers of Stem Cells | Completed | Multiple Myeloma                                                                                                              | Drug: Plerixafor Drug: Granulocyte-colony stimulating factor (G-CSF)                                                                                                                                                                  | The presence of myeloma tumor cells as measured by the percentage of myeloma tumor cells/CD34+ cells The presence of myeloma tumor cells as measured by the percentage of myeloma tumor cells/plerixafor cumulative dose/kg body weights The presence of myeloma tumor cells as measured by the percentage of myeloma tumor cells/G-CSF cumulative dose/kg body weight The change in tumor cell mobilization(TCM) in the peripheral blood The number of myeloma tumor cells per patient at each apheresis The number of patients who mobilize at least 4.5x10 <sup>5</sup> myeloma tumor cells/kg body weight as measured in each apheresis product CD34+ stem cell yield in the apheresis product The                                                                                                                                                                                                                                                                                                                                                                                | Phase 2        | 23  | Jun-13     | 7-Oct-16  |
| GM-CSF | NCT01760226 | Dose Adjusted EPOCH-R, to Treat Mature B Cell Malignancies                                                                                                                                                          | Completed | Diffuse Large B Cell Lymphoma Post Transplant Lymphoproliferative Disorder Primary Mediastinal (Thymic) Large B-cell Lymphoma | Drug: DA-EPOCH-R for DLBCL, PTLD, AND PMBCL Drug: Methotrexate Drug: Etoposide Drug: Doxorubicin Drug: Vincristine Drug: Rituximab Drug: Cyclophosphamide Drug: Prednisone Drug: G-CSF                                                | Measure and assess adverse events Measure and assess immune function                                                                                                                                                                                                                                                                                                                                                                                                                                                                                                                                                                                                                                                                                                                                                                                                                                                                                                                                                                                                                  | Early Phase 1  | 4   | Jan-13     | 17-Nov-17 |
| GM-CSF | NCT01767714 | Evaluation of Plerixafor Plus G-CSF to Mobilize and Collect 5 × 10 <sup>6</sup> CD34+ Cells/kg in Non-Hodgkin's Lymphoma (NHL) Patients for Autologous Transplantation                                              | Completed | Non-Hodgkin's Lymphoma                                                                                                        | Drug: Granulocyte-colony stimulating factor (G-CSF) Drug: Plerixafor Drug: Placebo                                                                                                                                                    | Number of patients who meet the target of ≥ 5 × 10 <sup>6</sup> CD34+ cells/kg in 4 or fewer days of apheresis Number of patients who achieve ≥ 2 × 10 <sup>6</sup> CD34+ cells/kg within 4 or fewer days of apheresis Number of days of apheresis to collect ≥ 2 × 10 <sup>6</sup> CD34+ cells/kg Number of days of apheresis to collect ≥ 5 × 10 <sup>6</sup> CD34+ cells/kg Total number of CD34+ cells collected Time from transplantation to neutrophil and platelet (PLT) engraftment Number of treatment-emergent adverse events (TEAEs) and serious adverse events (SAEs) Maximum plasma concentration (Cmax) Time to reach Cmax (Tmax) Area Under the Curve 0 to 10 hours post-dose (AUC0-10) Area Under the Curve 0 to last observed concentration (AUClast) Area Under the Curve (AUC) Percentage of extrapolation of AUC (AUCext) Half life (T1/2) Volume of distribution (Vz/F) Total body clearance (CL/F) Peripheral blood CD34+ cell counts (Pharmacodynamic analysis) The fold-increase in the number of circulating CD34+ following the first dose of plerixafor or | Phase 3        | 100 | April 2013 | 9-Dec-14  |
| GM-CSF | NCT01828762 | Autologous Immune Cell Therapy in Primary Hepatocellular Carcinoma Patients Following Resection and TACE Therapy                                                                                                    | Completed | Primary Hepatocellular Carcinoma                                                                                              | Biological: DC-TC+GM-CSF                                                                                                                                                                                                              | Vital signs, physical examinations and adverse events                                                                                                                                                                                                                                                                                                                                                                                                                                                                                                                                                                                                                                                                                                                                                                                                                                                                                                                                                                                                                                 | Not Applicable | 8   | Dec-12     | 23-Dec-13 |
| GM-CSF | NCT01867086 | Salvage Ovarian FANG™ Vaccine + Carboplatinum                                                                                                                                                                       | Completed | Stage III Ovarian Cancer Stage IV Ovarian Cancer                                                                              | Biological: Vigil™ Vaccine Drug: Carboplatinum Drug: Carboplatinum and                                                                                                                                                                | Time to Progression (TTP) Response Rate Immune Analysis in Blood                                                                                                                                                                                                                                                                                                                                                                                                                                                                                                                                                                                                                                                                                                                                                                                                                                                                                                                                                                                                                      | Phase 2        | 1   | Jun-13     | 19-Jun-18 |
| GM-CSF | NCT01896869 | A Phase 2, Multicenter Study of FOLFIRINOX Followed by Ipilimumab With Allogenic GM-CSF Transfected Pancreatic Tumor Vaccine in the Treatment of Metastatic Pancreatic                                              | Completed | Metastatic Pancreatic Adenocarcinoma                                                                                          | Drug: Ipilimumab Biological: Vaccine Drug: FOLFIRINOX                                                                                                                                                                                 | Overall Survival Number of adverse events as a measure of toxicity Progression Free Survival (PFS) immune-related Progression Free Survival (irPFS) Objective Response Rate Duration of Response Tumor Marker (CA19-9) Kinetics                                                                                                                                                                                                                                                                                                                                                                                                                                                                                                                                                                                                                                                                                                                                                                                                                                                       | Phase 2        | 83  | Nov-13     | 24-Dec-19 |
| GM-CSF | NCT01909752 | Combination Immunotherapy (DRibbles) for Patients With Definitively-Treated Stage III Non-small Cell Lung Cancer                                                                                                    | Completed | Carcinoma, Non-Small-Cell Lung                                                                                                | Drug: Cyclophosphamide Biological: DRibble vaccine Drug: Imiquimod Drug: GM-CSF Biological: HPV vaccine                                                                                                                               | Identify the regimen that produces the strongest antibody response Safety Progression free survival Immune response and progression-free survival correlation.                                                                                                                                                                                                                                                                                                                                                                                                                                                                                                                                                                                                                                                                                                                                                                                                                                                                                                                        | Phase 2        | 12  | Jul-13     | 6-Jul-17  |
| GM-CSF | NCT01939730 | Rituximab + GM-CSF in Patients With Follicular B-Cell Lymphoma                                                                                                                                                      | Completed | Lymphoma                                                                                                                      | Drug: Rituximab Drug: GM-CSF                                                                                                                                                                                                          | Overall Response Rate of Rituximab plus GM-CSF of repeat doses (once weekly times four)                                                                                                                                                                                                                                                                                                                                                                                                                                                                                                                                                                                                                                                                                                                                                                                                                                                                                                                                                                                               | Phase 2        | 42  | Aug-99     | 4-Nov-15  |
| GM-CSF | NCT01981122 | A Study of Sipuleucel-T With Administration of Enzalutamide in Men With Metastatic Castrate-Resistant Prostate Cancer                                                                                               | Completed | Metastatic Prostate Cancer                                                                                                    | Biological: sipuleucel-T Drug: enzalutamide                                                                                                                                                                                           | To Evaluate Peripheral PA2024-specific T Cell Proliferation Response to Sipuleucel-T Over Time Via a T Cell Stimulation Index (SI).                                                                                                                                                                                                                                                                                                                                                                                                                                                                                                                                                                                                                                                                                                                                                                                                                                                                                                                                                   | Phase 2        | 52  | Sep-13     | 24-Oct-18 |
| GM-CSF | NCT01989325 | A Study of Filanesib (ARRY-520) and Carfilzomib in Patients With Advanced Multiple Myeloma                                                                                                                          | Completed | Advanced Multiple Myeloma                                                                                                     | Drug: Carfilzomib, proteasome inhibitor; intravenous Drug: Filanesib, KSP(Eg5) inhibitor; intravenous Drug: Dexamethasone, steroid; oral or intravenous Drug: Filgrastim, granulocyte-colony stimulating factor (G-CSF); subcutaneous | Assess the efficacy of both carfilzomib + study drug and single-agent carfilzomib in terms of progression-free survival. Assess the efficacy of both carfilzomib + study drug and single-agent carfilzomib in terms of objective response rate. Assess the safety of both carfilzomib + study drug and single-agent carfilzomib in terms of adverse events, clinical laboratory tests and electrocardiograms. Characterize the pharmacokinetics (PK) of study drug, carfilzomib and a carfilzomib metabolite in patients treated with carfilzomib + study drug in terms of plasma concentration-time profiles and model-based PK parameters. Following crossover from single-agent carfilzomib, assess the efficacy of carfilzomib + study drug in terms of objective response rate. Following crossover from single-agent carfilzomib, assess the safety of carfilzomib + study drug in terms of adverse                                                                                                                                                                             | Phase 2        | 77  | Nov-13     | 29-Jul-16 |

|        |             |                                                                                                                                                                                                            |           |                                                                                                                                                                                                                                                                                                                                                                                                                                                                                                                                                                                                                                             |                                                                                                                                                                                                                                                                                                                                              |                                                                                                                                                                                                                                                                                                                                                                                                                                                                                                                                                                                                                                                                                                                                                                                                                                                                                                                                                                                                                       |                 |     |           |               |
|--------|-------------|------------------------------------------------------------------------------------------------------------------------------------------------------------------------------------------------------------|-----------|---------------------------------------------------------------------------------------------------------------------------------------------------------------------------------------------------------------------------------------------------------------------------------------------------------------------------------------------------------------------------------------------------------------------------------------------------------------------------------------------------------------------------------------------------------------------------------------------------------------------------------------------|----------------------------------------------------------------------------------------------------------------------------------------------------------------------------------------------------------------------------------------------------------------------------------------------------------------------------------------------|-----------------------------------------------------------------------------------------------------------------------------------------------------------------------------------------------------------------------------------------------------------------------------------------------------------------------------------------------------------------------------------------------------------------------------------------------------------------------------------------------------------------------------------------------------------------------------------------------------------------------------------------------------------------------------------------------------------------------------------------------------------------------------------------------------------------------------------------------------------------------------------------------------------------------------------------------------------------------------------------------------------------------|-----------------|-----|-----------|---------------|
| GM-CSF | NCT01989572 | Sargramostim, Vaccine Therapy, or Sargramostim and Vaccine Therapy in Preventing Disease Recurrence in Patients With Melanoma That Has Been Removed By Surgery                                             | Completed | Iris Melanoma Medium/Large Size Posterior Uveal Melanoma Mucosal Melanoma Ocular Melanoma With Extraocular Extension Recurrent Melanoma Recurrent Uveal Melanoma Small Size Posterior Uveal Melanoma Stage IIA Cutaneous Melanoma AJCC v6 and v7 Stage IIA Uveal Melanoma AJCC v7 Stage IIB Cutaneous Melanoma AJCC v6 and v7 Stage IIB Uveal Melanoma AJCC v7 Stage IIC Cutaneous Melanoma AJCC v6 and v7 Stage IIIA Cutaneous Melanoma AJCC v7 Stage IIIA Uveal Melanoma AJCC v7 Stage IIIB Cutaneous Melanoma AJCC v7 Stage IIIB Uveal Melanoma AJCC v7 Stage IIIC Cutaneous Melanoma AJCC v7 Stage IIIC Uveal Melanoma AJCC v7 Stage IV | Other: Laboratory Biomarker Analysis Other: Placebo Biological: Sargramostim Biological: Tyrosinase Peptide                                                                                                                                                                                                                                  | Overall Survival Recurrence Free Survival Overall Survival in Human Leukocyte Antigens-A2 (HLA-A2) Positive Patients Recurrence Free Survival in HLA-A2 Positive Patients 5-year Overall Survival Rate 5-year Recurrence Free Survival Rate                                                                                                                                                                                                                                                                                                                                                                                                                                                                                                                                                                                                                                                                                                                                                                           | Phase 2         | 815 | 23-Feb-00 | 11-Jun-19     |
| GM-CSF | NCT02019524 | Phase Ib Trial of Two Folate Binding Protein Peptide Vaccines (E39 and J65) in Breast and Ovarian Cancer                                                                                                   | Completed | Breast Cancer Ovarian Cancer                                                                                                                                                                                                                                                                                                                                                                                                                                                                                                                                                                                                                | Biological: E39 peptide vaccine Biological: E39 vaccine then J65 vaccine Biological: J65 vaccine then E39 vaccine                                                                                                                                                                                                                            | Primary vaccination strategy Short-term immunity Optimal booster inoculation strategy Delayed Type Hypersensitivity evaluation                                                                                                                                                                                                                                                                                                                                                                                                                                                                                                                                                                                                                                                                                                                                                                                                                                                                                        | Phase 1 Phase 2 | 39  | Sep-13    | 14-May-19     |
| GM-CSF | NCT02042690 | Haplo-identical HSCT Versus Chemotherapy for Adult Acute Lymphoblastic Leukemia Patients                                                                                                                   | Completed | Acute Lymphoblastic Leukemia                                                                                                                                                                                                                                                                                                                                                                                                                                                                                                                                                                                                                | Procedure: Haplo-identical HSCT Drug: Chemotherapy                                                                                                                                                                                                                                                                                           | Disease-free survival Rate of cumulative incidence of relapse Overall survival (OS) rate nonrelapse mortality                                                                                                                                                                                                                                                                                                                                                                                                                                                                                                                                                                                                                                                                                                                                                                                                                                                                                                         | Phase 3         | 131 | Jul-14    | 29-May-19     |
| GM-CSF | NCT02044796 | Filgrastim, Cladribine, Cytarabine, and Mitoxantrone Hydrochloride in Treating Patients With Newly Diagnosed or Relapsed/Refractory Acute Myeloid Leukemia or High-Risk Myelodysplastic Syndromes          | Completed | Acute Biphenotypic Leukemia de Novo Myelodysplastic Syndrome Previously Treated Myelodysplastic Syndrome Recurrent Adult Acute Myeloid Leukemia Untreated Adult Acute Myeloid Leukemia Secondary Acute Myeloid Leukemia                                                                                                                                                                                                                                                                                                                                                                                                                     | Drug: Cytarabine Biological: Cladribine Drug: Filgrastim Other: Laboratory Biomarker Analysis Drug: Mitoxantrone Hydrochloride                                                                                                                                                                                                               | Number of Participants With Dose Limiting Toxicities of Mitoxantrone (Phase I, Dose Level 4) Minimal Residual Disease Negative Complete Remission Rate in Patients With Newly Diagnosed Disease (Phase II) Overall Survival (Phase II) Remission Rate (Complete Remission and Complete Remission With Incomplete Platelet Count Recovery) of This Regimen in Patients With Relapsed/Refractory Disease (Phase II)                                                                                                                                                                                                                                                                                                                                                                                                                                                                                                                                                                                                     | Phase 2         | 199 | 23-Jan-14 | 10-Jan-20     |
| GM-CSF | NCT02092922 | A Phase 2 Trial of Filanesib in Relapsed/Refractory Multiple Myeloma (A-FIRM)                                                                                                                              | Completed | Advanced Multiple Myeloma                                                                                                                                                                                                                                                                                                                                                                                                                                                                                                                                                                                                                   | Drug: Filanesib, KSP (Eg5) inhibitor, intravenous Drug: Filgrastim, granulocyte-colony stimulating factor (G-CSF), subcutaneous                                                                                                                                                                                                              | In patients with low Baseline alpha 1-acid glycoprotein (AAG), assess the efficacy of the study drug in terms of objective response rate. In patients with high Baseline AAG, assess the efficacy of the study drug in terms of objective response rate. In all patients, assess the efficacy of the study drug in terms of duration of response. In all patients, assess the efficacy of the study drug in terms of progression-free survival. In all patients, assess the efficacy of study drug in terms of overall survival. In all patients, assess the safety of the study drug in terms of adverse events, clinical laboratory tests and electrocardiograms. In a subset of all patients, characterize the pharmacokinetics (PK) of the study drug in terms of plasma concentration-time profiles. In a subset of all patients, assess the correlation between study drug exposure and changes in corrected QT interval (QTc) in terms of changes in QTc versus time-matched study drug plasma concentrations. | Phase 2         | 154 | May-14    | 6-Oct-17      |
| GM-CSF | NCT02098109 | Non-inferiority Study of XM02 Filgrastim (Granix) and Filgrastim (Neupogen) in Combination With Plerixafor for Autologous Stem Cell Mobilization in Patients With Multiple Myeloma or Non-Hodgkin Lymphoma | Completed | Multiple Myeloma Lymphoma, Non-Hodgkin                                                                                                                                                                                                                                                                                                                                                                                                                                                                                                                                                                                                      | Drug: XM02 Filgrastim Drug: Filgrastim Procedure: Apheresis Drug: Plerixafor Procedure: Stem Cell Transplant                                                                                                                                                                                                                                 | Comparison of the Mean Day 5 CD34+Cells/kg Yield Between the Two Arms Comparison of the Most Commonly Reported Adverse Events (Safety) Experienced by Participants Between the Two Arms Comparison of the Time to Neutrophil Engraftment Between the Two Arms Comparison of the Time to Platelet Engraftment Between the Two Arms Comparison of the Readmission Rate Between the Two Arms Comparison of the Percentage of Patients Who Collect > 2.0x10^6 CD34+Cells/kg Following PBSC Mobilization Between the Two Arms Comparison of the Percentage of Patients Who Collect > 5.0x10^6 CD34+Cells/kg Following PBSC Mobilization Between the Two Arms Comparison of the Percentage of Patients Who Collect > 2.0x10^6 CD34+Cells/kg in One Apheresis Procedure Following PBSC Mobilization Between the Two Arms Comparison of the Percentage of Patients Who Collect > 5.0x10^6 CD34+Cells/kg                                                                                                                       | Phase 2         | 100 | 20-Aug-14 | 18-Jul-17     |
| GM-CSF | NCT02100930 | Anti-GD2 3F8 Monoclonal Antibody and GM-CSF for High-Risk Neuroblastoma                                                                                                                                    | Completed | Neuroblastoma                                                                                                                                                                                                                                                                                                                                                                                                                                                                                                                                                                                                                               | Biological: Anti-GD2 3F8 Monoclonal Antibody Drug: GM-CSF (granulocyte-macrophage colony-stimulating factor) Drug: oral isotretinoin                                                                                                                                                                                                         | relapse-free survival complete remission                                                                                                                                                                                                                                                                                                                                                                                                                                                                                                                                                                                                                                                                                                                                                                                                                                                                                                                                                                              | Not Applicable  | 69  | Mar-14    | April 4, 2019 |
| GM-CSF | NCT02130869 | A Pilot Study of Immunotherapy Including Haploidentical NK Cell Infusion Following CD133+ Positively-Selected Autologous Hematopoietic Stem Cells in Children With High Risk Solid Tumors or Lymphomas     | Completed | Neuroblastoma Lymphoma High-risk Tumor                                                                                                                                                                                                                                                                                                                                                                                                                                                                                                                                                                                                      | Biological: CD133+ selected autologous stem cell infusion Biological: IL-2 Biological: hu14.18K322A Drug: Busulfan Drug: Melphalan Biological: GM-CSF Drug: Bendamustine Drug: Etoposide Drug: Cytarabine Drug: Carboplatin Device: Haploidentical natural killer cell infusion Biological: G-CSF Drug: Etoposide phosphate Device: CiniMACS | Percent of participants with positive ANC engraftment Overall survival Disease-free survival Incidence of relapse Lymphocyte and hematopoietic reconstitution Characteristics of the stem cell grafts Characteristics of the natural killer cell grafts Overall survival of patients treated without stem cell manipulation or NK cell infusion due to off therapy criteria                                                                                                                                                                                                                                                                                                                                                                                                                                                                                                                                                                                                                                           | Phase 1         | 8   | 10-Oct-14 | 22-Dec-17     |
| GM-CSF | NCT02149225 | GAPVAC Phase I Trial in Newly Diagnosed Glioblastoma Patients                                                                                                                                              | Completed | Glioblastoma                                                                                                                                                                                                                                                                                                                                                                                                                                                                                                                                                                                                                                | Drug: APVAC1 vaccine plus Poly-ICL and GM-CSF Drug: APVAC2 vaccine plus Poly-ICL and GM-CSF                                                                                                                                                                                                                                                  | Safety profile of patient-tailored APVAC vaccines when administered with immunomodulators concurrent to maintenance TMZ cycles Frequency of CD8 T cells specific for vaccinated APVAC peptides as measure of immunological response to and biological activity of the vaccine Frequency of immune cell populations in the blood and concentrations of a large panel of serum and plasma proteins with immunological relevance as a measure of the immune status of the patient Overall survival Progression-                                                                                                                                                                                                                                                                                                                                                                                                                                                                                                          | Phase 1         | 16  | Oct-14    | 7-Aug-18      |



|        |             |                                                                                                                                                                                                           |           |                                                                                                                       |                                                                                                                                                                                 |                                                                                                                                                                                                                                                                                                                                                                                                                                                                                                                                                                                                                                                                                                                                                           |                 |     |           |           |
|--------|-------------|-----------------------------------------------------------------------------------------------------------------------------------------------------------------------------------------------------------|-----------|-----------------------------------------------------------------------------------------------------------------------|---------------------------------------------------------------------------------------------------------------------------------------------------------------------------------|-----------------------------------------------------------------------------------------------------------------------------------------------------------------------------------------------------------------------------------------------------------------------------------------------------------------------------------------------------------------------------------------------------------------------------------------------------------------------------------------------------------------------------------------------------------------------------------------------------------------------------------------------------------------------------------------------------------------------------------------------------------|-----------------|-----|-----------|-----------|
| GM-CSF | NCT02156388 | Safety and Pharmacokinetic(PK) Study of GW003 to Metastatic Tumors                                                                                                                                        | Completed | Chemotherapy-induced Neutropenia Metastatic Tumors                                                                    | Biological: GW003                                                                                                                                                               | Number of participants with adverse event Duration of severe neutropenia(DSN) Anti-GW003 antibody half-life(consists of distribution half-life [t1/2α] and elimination half-life [t1/2β]) area under the concentration-time curve (AUC)                                                                                                                                                                                                                                                                                                                                                                                                                                                                                                                   | Phase 1         | 31  | Aug-13    | 24-Feb-16 |
| GM-CSF | NCT02159950 | Sipuleucel-T With or Without Tasquinimod in Treating Patients With Metastatic Hormone-Resistant Prostate Cancer                                                                                           | Completed | Hormone-Resistant Prostate Cancer Metastatic Prostate Carcinoma Recurrent Prostate Carcinoma Stage IV Prostate Cancer | Other: Laboratory Biomarker Analysis Biological: Sipuleucel-T Drug: Tasquinimod                                                                                                 | Change in Immune Response Assessed by IFN-g ELISPOT Specific for PA2024 Change in PSA Response Duration of PSA Response Frequency of Toxicities Assessed by the National Cancer Institute Common Terminology Criteria for Adverse Events Version 4 Immune Response Immune Response (Arm 2 Only) Objective Response Rates (Partial or Complete) Overall Survival Progression-free Survival Time to PSA Progression                                                                                                                                                                                                                                                                                                                                         | Phase 2         | 2   | Jan-15    | 24-Jun-16 |
| GM-CSF | NCT02167958 | Nonmyeloablative Hematopoietic Cell Transplantation (HCT) for Patients With Hematologic Malignancies Using Related, HLA-Haploidentical Donors: A Pilot Trial of Peripheral Blood Stem Cells (PBSC) as the | Completed | Leukemia MDS Myelofibrosis Lymphoma                                                                                   | Drug: Fludarabine Drug: Cyclophosphamide Drug: Mesna Radiation: Total Body Irradiation Other: Hematopoietic stem cell infusion Drug: Tacrolimus Drug: Mycophenolate Drug: G-CSF | Acute GvHD Chronic Graft-versus-Host Disease Nonrelapse Mortality (NRM) Relapse of Malignancy Neutrophil Recovery Primary graft failure Secondary graft failure Platelet recovery Donor Cell Engraftment Progression-free Survival Infections                                                                                                                                                                                                                                                                                                                                                                                                                                                                                                             | Phase 1         | 28  | 11-Feb-15 | 15-Oct-19 |
| GM-CSF | NCT02173262 | REACT Integrated Consent Model to Compare Two Standard of Care                                                                                                                                            | Completed | Breast Cancer                                                                                                         | Drug: G-CSF Drug: Ciprofloxacin                                                                                                                                                 | The percentage of randomized patients in each physician's practice rates of febrile neutropenia                                                                                                                                                                                                                                                                                                                                                                                                                                                                                                                                                                                                                                                           | Phase 4         | 142 | Aug-14    | 6-Nov-17  |
| GM-CSF | NCT02220608 | Phase I Study of Bortezomib With G-CSF for Stem Cell Mobilization in Patients With Multiple Myeloma                                                                                                       | Completed | Multiple Myeloma                                                                                                      | Biological: Bortezomib Drug: G-CSF                                                                                                                                              | Maximum tolerated dose (MTD) of bortezomib when given with G-CSF                                                                                                                                                                                                                                                                                                                                                                                                                                                                                                                                                                                                                                                                                          | Phase 1         | 10  | 20-Feb-15 | 8-Jan-18  |
| GM-CSF | NCT02221479 | Plerixafor Plus Granulocyte Colony-stimulating Factor (G-CSF) For Mobilization And Collection Of Peripheral Hematopoietic Stem Cells In Japanese Participants With Multiple Myeloma                       | Completed | Multiple Myeloma                                                                                                      | Drug: plerixafor GZ316455 Drug: Filgrastim                                                                                                                                      | Proportion of participants who achieve a collection of greater than or equal to 6 x10 <sup>6</sup> cells/kg CD34+ cells in less than or equal to 2 days of apheresis Proportion of participants who achieve a collection of a minimum target of 2 x10 <sup>6</sup> cells/kg CD34+ cells in less than or equal to 4 days of apheresis Number of days of apheresis to collect 6 x10 <sup>6</sup> cells/kg CD34+ cells Number of days of apheresis to collect 2 x10 <sup>6</sup> cells/kg CD34+ cells Total number of CD34+ cells/kg collected over up to 4 apheresis The relative increase (ratio) of peripheral blood CD34+ cell count (cells/μL) Number of participants with adverse                                                                      | Phase 2         | 14  | Oct-14    | 4-Aug-15  |
| GM-CSF | NCT02221492 | Plerixafor Plus Granulocyte Colony-Stimulating Factor For Mobilization And Collection Of Peripheral Hematopoietic Stem Cells In Japanese Participants With Non-Hodgkin Lymphoma                           | Completed | Lymphoma                                                                                                              | Drug: plerixafor GZ316455 Drug: Filgrastim                                                                                                                                      | Proportion of participants who achieve a collection of greater than or equal to 5 x10 <sup>6</sup> cells/kg CD34+ cells in less than or equal to 4 days of apheresis Proportion of participants who achieve a collection of a minimum target of 2 x10 <sup>6</sup> cells/kg CD34+ cells in less than or equal to 4 days of apheresis Number of days of apheresis to collect 5 x10 <sup>6</sup> cells/kg CD34+ cells Number of days of apheresis to collect 2 x10 <sup>6</sup> cells/kg CD34+ cells Total number of CD34+ cells/kg collected over up to 4 apheresis The relative increase (ratio) of peripheral blood (PB) CD34+ cell count (cells/μL) Number of participants with adverse events Change from baseline in clinical laboratory measurements | Phase 2         | 32  | Nov-14    | 30-Mar-16 |
| GM-CSF | NCT02247869 | Dose-dense ABVD First Line Therapy in Early Stage Unfavorable Hodgkin's Lymphoma                                                                                                                          | Completed | Hodgkin Lymphoma                                                                                                      | Drug: dose dense ABVD                                                                                                                                                           | Feasibility Activity Overall accuracy of each interim PET interpretation criteria after a minimum follow-up of three years PFS OS Toxicity Predictive Value of each interim PET interpretation criteria after a minimum follow-up of three years                                                                                                                                                                                                                                                                                                                                                                                                                                                                                                          | Phase 2         | 100 | Feb-12    | 9-Feb-18  |
| GM-CSF | NCT02261714 | Antigen-specific Cancer Immunotherapy (TG01) and Gemcitabine as Adjuvant Therapy in                                                                                                                       | Completed | Pancreatic Cancer, Resected                                                                                           | Biological: TG01                                                                                                                                                                | Patients' safety during study Patients' Immune response Clinical Efficacy                                                                                                                                                                                                                                                                                                                                                                                                                                                                                                                                                                                                                                                                                 | Phase 1 Phase 2 | 32  | Dec-12    | 23-Sep-19 |
| GM-CSF | NCT02276300 | HER2-Peptide Vaccination of Patients With Solid Tumors                                                                                                                                                    | Completed | Gastric Cancer Breast Cancer                                                                                          | Drug: Cyclophosphamide Drug: Sargramostim Drug: HER2-Peptide-Vakzinel Drug: Imiquimod                                                                                           | Safety and tolerability of HER2-derived peptide vaccination measured by clinical and chemical parameters.                                                                                                                                                                                                                                                                                                                                                                                                                                                                                                                                                                                                                                                 | Phase 1         | 2   | Dec-14    | 20-Nov-19 |
| GM-CSF | NCT02282215 | Safety and Efficacy of Human Myeloid Progenitor Cells (CLT-008) During Chemotherapy for Acute Myeloid Leukemia                                                                                            | Completed | Acute Myeloid Leukemia Neutropenia Infection                                                                          | Biological: CLT-008 Biological: G-CSF                                                                                                                                           | Duration of febrile episodes (fever) Time to absolute neutrophil count (ANC) recovery Incidence and duration of febrile neutropenia Incidence and duration of infection Incidence and severity of mucositis Incidence of infusion reactions Incidence of Graft-versus-Host Disease (GVHD) Incidence of Adverse Events (AE) Incidence of                                                                                                                                                                                                                                                                                                                                                                                                                   | Phase 2         | 163 | Dec-14    | 27-Sep-18 |
| GM-CSF | NCT02305979 | Evaluation of Loratadine for G-CSF Induced Bone Pain in Patients With Hematologic Malignancies                                                                                                            | Completed | Leukemia Lymphoma                                                                                                     | Drug: Loratadine                                                                                                                                                                | Incidence of bone pain following G-CSF administration                                                                                                                                                                                                                                                                                                                                                                                                                                                                                                                                                                                                                                                                                                     |                 | 61  | Dec-14    | 3-Jul-18  |
| GM-CSF | NCT02365818 | Safety and Efficacy of CG0070 Oncolytic Virus Regimen for High Grade NMIBC After BCG Failure                                                                                                              | Completed | Bladder Cancer                                                                                                        | Biological: CG0070                                                                                                                                                              | Durable Complete Response Proportion (DCR) Cystectomy Free Survival Complete Response Survival Progression Free Survival Time to Progression to Muscle Invasive Disease Overall Survival PD-L1 Status Changes Organ Confined Disease Proportions Complete Response Proportions PD-1 Status Changes Disease Regression                                                                                                                                                                                                                                                                                                                                                                                                                                     | Phase 2         | 66  | 2-Jun-15  | 20-Mar-19 |
| GM-CSF | NCT02380443 | AlloStim® Immunotherapy Dosing Alone or in Combination With Cryoablation in Metastatic Colorectal Cancer                                                                                                  | Completed | Colorectal Cancer Metastatic                                                                                          | Biological: AlloStim Procedure: Cryoablation                                                                                                                                    | To determine the safety of increased frequency of dosing (Part 1) (whether a Dose Limiting Toxicity (DLT) has occurred) To evaluate the anti-tumor effect of AlloStim combined with cryoablation at the new proposed dose and frequency schedule (Part 2) To assess change from baseline in Health-Related Quality of Life (HRQoL)                                                                                                                                                                                                                                                                                                                                                                                                                        | Phase 2         | 12  | Sep-16    | 22-Jan-20 |
| GM-CSF | NCT02383212 | Study of REGN2810 (Anti-PD-1) in Patients With Advanced Malignancies                                                                                                                                      | Completed | Advanced Cancer Advanced Malignancies                                                                                 | Drug: Cemiplimab Radiation: Hypofractionated radiotherapy Drug: Cyclophosphamide Drug: Docetaxel Drug: Carboplatin Drug: GM-CSF Drug: Paclitaxel Drug: Pemetrexed               | Incidence of Treatment Emergent Adverse Events (TEAEs) Incidence of abnormal laboratory findings Number of participants with dose limiting toxicities (DLTs) Response Evaluation Criteria in Solid Tumors (RECIST) as measured by Computed Tomography (CT) or Magnetic Resonance Imaging (MRI) Immune-Related Response Criteria (irRC) applied to RECIST measurements Incidence of development of anti-cemiplimab antibodies Antitumor activity measured by progression-free survival (PFS) Antitumor                                                                                                                                                                                                                                                     | Phase 1         | 398 | 2-Feb-15  | 27-Jan-20 |

|        |             |                                                                                                                                                            |           |                                                                                                                                                                                                  |                                                                                                                               |                                                                                                                                                                                                                                                                                                                                                                                                                                                                                                                                                                                                                                                                                                                                                                                                                                                                                                                                                                                                                                                                                                                                                                                                                                                                    |                 |     |            |               |
|--------|-------------|------------------------------------------------------------------------------------------------------------------------------------------------------------|-----------|--------------------------------------------------------------------------------------------------------------------------------------------------------------------------------------------------|-------------------------------------------------------------------------------------------------------------------------------|--------------------------------------------------------------------------------------------------------------------------------------------------------------------------------------------------------------------------------------------------------------------------------------------------------------------------------------------------------------------------------------------------------------------------------------------------------------------------------------------------------------------------------------------------------------------------------------------------------------------------------------------------------------------------------------------------------------------------------------------------------------------------------------------------------------------------------------------------------------------------------------------------------------------------------------------------------------------------------------------------------------------------------------------------------------------------------------------------------------------------------------------------------------------------------------------------------------------------------------------------------------------|-----------------|-----|------------|---------------|
| GM-CSF | NCT02452775 | Autologous OC-L Vaccine and Ovarian Cancer                                                                                                                 | Completed | Primary Ovarian Cancer Fallopian Tube Cancer Primary Peritoneal Cancer                                                                                                                           | Biological: OC-L Other: Montanide Other: poly-ICLC (Hiltonol)                                                                 | Numbers of Adverse Events                                                                                                                                                                                                                                                                                                                                                                                                                                                                                                                                                                                                                                                                                                                                                                                                                                                                                                                                                                                                                                                                                                                                                                                                                                          | Not Applicable  | 12  | May-15     | 1-Jun-18      |
| GM-CSF | NCT02467868 | Efficacy and Safety Study With MYL-1401H and Neulasta                                                                                                      | Completed | Breast Neoplasms Chemotherapy-Induced Febrile Neutropenia                                                                                                                                        | Biological: MYL-1401H Biological: Neulasta                                                                                    | Mean Duration of Severe Neutropenia (DSN), defined as consecutive days with absolute neutrophil count (ANC) < 0.5 × 10 <sup>9</sup> /L The rate of febrile neutropenia (FN)                                                                                                                                                                                                                                                                                                                                                                                                                                                                                                                                                                                                                                                                                                                                                                                                                                                                                                                                                                                                                                                                                        | Phase 3         | 193 | Mar-15     | 16-Mar-16     |
| GM-CSF | NCT02474186 | Phase II Study for Solid Metastatic Tumors                                                                                                                 | Completed | Breast Cancer Metastatic Breast Cancer Solid Tumor                                                                                                                                               | Radiation: Radiation therapy Drug: Xeloda Drug: paclitaxel                                                                    | The proportion of patients with an abscopal response assessed at 7-8 weeks after the initiation of treatment The number of participants with adverse events from the date of enrollment until 12 years from the opening of the study The proportion of patients alive with abscopal responses from the date of enrollment until date of death from any cause.                                                                                                                                                                                                                                                                                                                                                                                                                                                                                                                                                                                                                                                                                                                                                                                                                                                                                                      | Phase 2         | 41  | April 2003 | 3-Aug-17      |
| GM-CSF | NCT02527746 | Study of F-627 in Women With Breast Cancer Receiving Myelotoxic Chemotherapy                                                                               | Completed | Neutropenia Breast Cancer                                                                                                                                                                        | Biological: F-627 Drug: EC regimen                                                                                            | Number of participants with adverse events as measure of safety and tolerability of F-627 in female patients with breast cancer receiving adjuvant chemotherapy Maximum Plasma Concentration as a measure of pharmacokinetics profile of F-627 Area Under the Curve as a measure of pharmacokinetics profile of F-627 Clearance and Mean Residence Time as a measure of pharmacokinetics profile of F-627 Absolute Neutrophil Count changes over time as measure of pharmacodynamics of F-627.                                                                                                                                                                                                                                                                                                                                                                                                                                                                                                                                                                                                                                                                                                                                                                     | Phase 1 Phase 2 | 18  | Dec-12     | 19-Aug-15     |
| GM-CSF | NCT02574533 | Pilot Study of Vigil™ + Pembrolizumab for Advanced Melanoma                                                                                                | Completed | Melanoma Recurrent Malignant Melanoma Melanoma                                                                                                                                                   | Biological: Vigil Drug: Pembrolizumab                                                                                         | Tumor Immune-Related Response to Vigil and Vigil + Pembrolizumab Best Overall Response Rate (ORR) to Vigil and Vigil + Pembrolizumab Toxicities and AEs for Vigil + Pembrolizumab according to the Common Toxicity Criteria for Adverse Events (CTCAE)                                                                                                                                                                                                                                                                                                                                                                                                                                                                                                                                                                                                                                                                                                                                                                                                                                                                                                                                                                                                             | Phase 1         | 2   | Oct-15     | 27-Sep-17     |
| GM-CSF | NCT02786719 | A Study of High Risk Induction Chemotherapy for Neuroblastoma Without Prophylactic Administration of Myeloid Growth Factors                                | Completed | Neuroblastoma                                                                                                                                                                                    | Drug: Topotecan Drug: Cyclophosphamide Drug: Cisplatin Drug: Etoposide Drug: Vincristine Drug: Doxorubicin Drug: Sargramostim | the incidence of infections in chemotherapy cycles NOT followed by hematopoietic growth factors incidence of delay in chemotherapy administration due to prolonged neutrophil recovery the number of antibiotic days and hospital days due to fever and/or infection number of platelet transfusions in patients undergoing induction chemotherapy the response rate following induction chemotherapy without prophylactic                                                                                                                                                                                                                                                                                                                                                                                                                                                                                                                                                                                                                                                                                                                                                                                                                                         | Not Applicable  | 13  | Jun-16     | 21-Jan-20     |
| GM-CSF | NCT02800954 | Value of Macrophage-Colony Stimulating Factor as a New Marker of Bone Lesions in Multiple Myeloma                                                          | Completed | Multiple Myeloma                                                                                                                                                                                 | Biological: blood samples Biological: Bone marrow samples                                                                     | Serum Macrophage-Colony Stimulating Factor (M-CSF) levels Tumour osteolysis                                                                                                                                                                                                                                                                                                                                                                                                                                                                                                                                                                                                                                                                                                                                                                                                                                                                                                                                                                                                                                                                                                                                                                                        | Not Applicable  | 111 | 23-Feb-09  | 23-Jan-19     |
| GM-CSF | NCT02841722 | Evaluation and Modeling of the G-CSF Effect on the Evolution of Neutrophils During Chemotherapy                                                            | Completed | Breast Cancer                                                                                                                                                                                    | Procedure: ERIBULIN + G-CSF (Granulocyte-Colony Stimulating Factor)                                                           | Variation of Neutrophils concentration in patient treated with G-CSF (Granulocyte-Colony Stimulating Factor)                                                                                                                                                                                                                                                                                                                                                                                                                                                                                                                                                                                                                                                                                                                                                                                                                                                                                                                                                                                                                                                                                                                                                       | Not Applicable  | 95  | 3-Dec-15   | 27-Jan-20     |
| GM-CSF | NCT02944604 | The Efficacy and Safety of PEG-rhG-CSF ( Pegylated Recombinant Human Granulocyte Colony Stimulating Factor)in Patients With Breast Cancer Who Were Treated | Completed | Breastcancer                                                                                                                                                                                     | Drug: PEG-rhG-CSF                                                                                                             | Incidence of chemotherapy delay                                                                                                                                                                                                                                                                                                                                                                                                                                                                                                                                                                                                                                                                                                                                                                                                                                                                                                                                                                                                                                                                                                                                                                                                                                    | Phase 4         | 240 | 8-Sep-16   | 18-Jan-19     |
| GM-CSF | NCT03014076 | Immunotherapy Vaccine and Herceptin in Breast Cancer                                                                                                       | Completed | Breastcancer                                                                                                                                                                                     | Drug: GP2 peptide + GM-CSF vaccine plus trastuzumab Drug: Trastuzumab                                                         | Treatment-Related Adverse Events as Assessed by CTCAE v4.0                                                                                                                                                                                                                                                                                                                                                                                                                                                                                                                                                                                                                                                                                                                                                                                                                                                                                                                                                                                                                                                                                                                                                                                                         | Phase 1         | 30  | Jan-08     | 9-Jan-17      |
| GM-CSF | NCT03246009 | Fusion Protein rHSA/GCSFclinical Study on Breast Cancer Patients                                                                                           | Completed | Chemotherapy-induced Neutropenia Cancer, Breast                                                                                                                                                  | Drug: rHSA/GCSF                                                                                                               | Number of adverse events AUC                                                                                                                                                                                                                                                                                                                                                                                                                                                                                                                                                                                                                                                                                                                                                                                                                                                                                                                                                                                                                                                                                                                                                                                                                                       | Phase 1         | 24  | 21-Jan-16  | 11-Aug-17     |
| GM-CSF | NCT04174599 | Trial to Compare the Efficacy and Safety of F-627 and GRAN®                                                                                                | Completed | Breast Cancer                                                                                                                                                                                    | Biological: F-627                                                                                                             | The efficacy of F-627 versus GRAN® in the first cycle of prophylactic treatment in subjects with breast cancer receiving chemotherapy, as assessed by the number of days in which ANC < 1.0 × 10 <sup>9</sup> /L in cycle 1 incidence of grade 3 or 4 neutropenia as assessed by ANC ( ANC < 1.0 × 10 <sup>9</sup> /L and ANC < 0.5 × 10 <sup>9</sup> /L, respectively )  durations (days) of grade 3 or 4 neutropenia as assessed by ANC ( ANC < 1.0 × 10 <sup>9</sup> /L and ANC < 0.5 × 10 <sup>9</sup> /L, respectively )  incidence and duration (days) of grade 4 neutropenia are all as assessed by ANC ( ANC < 0.5 × 10 <sup>9</sup> /L )  overall duration (days) of grade 3 or 4 neutropenia as assessed by ANC ( ANC < 1.0 × 10 <sup>9</sup> /L and ANC < 0.5 × 10 <sup>9</sup> /L, respectively )  The incidence and duration (days) of grade 2 or above neutropenia are all assessed by ANC (ANC < 1.5 × 10 <sup>9</sup> /L) Incidence of febrile neutropenia (FN) (defined as ANC < 1.0×10 <sup>9</sup> /L; a single measurement of body temperature > 38.3°C or a temperature ≥ 38.0 °C sustained over 1 h) ANC nadir The neutrophil count nadir from day 3 to day 13 of cycle 1 the time ( days ) of ANC nadir returns to 2.0 × 10 <sup>9</sup> /L | Phase 3         | 242 | April 2018 | 12, 22-Nov-19 |
| GM-CSF | NCT01355393 | Vaccine Therapy in Combination With Rintatolimod and/or Sargramostim in Treating Patients With Stage II-IV HER2-Positive Breast Cancer                     | Completed | HER2-positive Breast Cancer Male Breast Cancer Recurrent Breast Cancer Stage II Breast Cancer Stage IIIA Breast Cancer Stage IIIB Breast Cancer Stage IIIC Breast Cancer Stage IVC Breast Cancer | Biological: HER-2/neu peptide vaccine Biological: sargramostim Drug: rintatolimod                                             | Evaluation of immune response among the different treatment arms in Stage I and II Evaluation of safety and systemic toxicity among the different treatment arms in Stage I and II Disease-free survival Overall survival                                                                                                                                                                                                                                                                                                                                                                                                                                                                                                                                                                                                                                                                                                                                                                                                                                                                                                                                                                                                                                          | Phase 1 Phase 2 | 50  | Jul-11     | 10-Feb-20     |

|        |             |                                                                                                                                                                                                                        |           |                                                                                                                                                                                                                                                                                                                                                                                                                                                                                                                                                                                                                                                                                                                                                                                                                                                                                                                                  |                                                                                                                                                                                                                                                                                                                                                                                                                                                                                                                                                                                                                                                                |                                                                                                                                                                                                                                                                                                                                                                                                                                                                                                                                                                                                                                                                                                                                                                                |         |     |           |           |
|--------|-------------|------------------------------------------------------------------------------------------------------------------------------------------------------------------------------------------------------------------------|-----------|----------------------------------------------------------------------------------------------------------------------------------------------------------------------------------------------------------------------------------------------------------------------------------------------------------------------------------------------------------------------------------------------------------------------------------------------------------------------------------------------------------------------------------------------------------------------------------------------------------------------------------------------------------------------------------------------------------------------------------------------------------------------------------------------------------------------------------------------------------------------------------------------------------------------------------|----------------------------------------------------------------------------------------------------------------------------------------------------------------------------------------------------------------------------------------------------------------------------------------------------------------------------------------------------------------------------------------------------------------------------------------------------------------------------------------------------------------------------------------------------------------------------------------------------------------------------------------------------------------|--------------------------------------------------------------------------------------------------------------------------------------------------------------------------------------------------------------------------------------------------------------------------------------------------------------------------------------------------------------------------------------------------------------------------------------------------------------------------------------------------------------------------------------------------------------------------------------------------------------------------------------------------------------------------------------------------------------------------------------------------------------------------------|---------|-----|-----------|-----------|
| GM-CSF | NCT01536054 | Sirolimus and Vaccine Therapy in Treating Patients With Stage II-IV Ovarian Epithelial, Fallopian Tube, or Primary Peritoneal Cavity Cancer                                                                            | Completed | Recurrent Fallopian Tube Cancer Recurrent Ovarian Epithelial Cancer Recurrent Primary Peritoneal Cavity Cancer Stage IIA Fallopian Tube Cancer Stage IIA Ovarian Epithelial Cancer Stage IIA Primary Peritoneal Cavity Cancer Stage IIB Fallopian Tube Cancer Stage IIB Ovarian Epithelial Cancer Stage IIB Primary Peritoneal Cavity Cancer Stage IIC Fallopian Tube Cancer Stage IIC Ovarian Epithelial Cancer Stage IIC Primary Peritoneal Cavity Cancer Stage IIIA Fallopian Tube Cancer Stage IIIA Ovarian Epithelial Cancer Stage IIIA Primary Peritoneal Cavity Cancer Stage IIIB Fallopian Tube Cancer Stage IIIB Ovarian Epithelial Cancer Stage IIIB Primary Peritoneal Cavity Cancer Stage IIIC Fallopian Tube Cancer Stage IIIC Ovarian Epithelial Cancer Stage IIIC Primary Peritoneal Cavity Cancer Stage IVC Fallopian Tube Cancer Stage IVC Ovarian Epithelial Cancer Stage IVC Primary Peritoneal Cavity Cancer | Biological: ALVAC(2)-NY-ESO-1 (M)/TRICOM vaccine Drug: sirolimus Other: laboratory biomarker analysis Biological: sargramostim                                                                                                                                                                                                                                                                                                                                                                                                                                                                                                                                 | Safety of ALVAC(2)-NY-ESO-1 (M)/TRICOM vaccine in combination with varying dose levels and schedules of sirolimus, assessed using the National Cancer Institute (NCI) Common Terminology Criteria for Adverse Events (CTCAE) version 4 Effectiveness of sirolimus on enhancing vaccine efficacy, assessed by NY-ESO-1 specific cellular and humoral immunity Antibody titers NY-ESO-1 specific CD8+ and CD4+ frequency and function Frequency of memory T-cell populations TCR avidity Secondary recall response Time to disease progression                                                                                                                                                                                                                                   | Phase 1 | 7   | 20-Aug-12 | 27-Mar-20 |
| GM-CSF | NCT01840579 | Study of Pembrolizumab (MK-3475) Monotherapy in Advanced Solid Tumors and Pembrolizumab Combination Therapy in Advanced Non-small Cell Lung Cancer/ Extensive-disease Small Cell Lung Cancer (MK-3475-011/KEYNOTE-011) | Completed | Solid Tumor Non-small Cell Lung Cancer Small Cell Lung Cancer                                                                                                                                                                                                                                                                                                                                                                                                                                                                                                                                                                                                                                                                                                                                                                                                                                                                    | Biological: Pembrolizumab 2 mg/kg Biological: Pembrolizumab 10 mg/kg Biological: Pembrolizumab 200 mg Drug: Cisplatin 75 mg/m^2 Drug: Pemetrexed 500 mg/m^2 Drug: Carboplatin AUC 5 mg/mL/min Drug: Carboplatin AUC 6 mg/mL/min Drug: Paclitaxel 200 mg/m^2 Drug: Nab-paclitaxel 100 mg/m^2 Biological: Ipilimumab 1 mg/kg Drug: Etoposide 100 mg/m^2 Drug:                                                                                                                                                                                                                                                                                                    | Number of participants experiencing dose-limiting toxicities (DLTs) Number of Participants Who Experience at Least One Adverse Event (AE) Number of Participants Who Discontinue Study Treatment Due to an Adverse Event (AE)                                                                                                                                                                                                                                                                                                                                                                                                                                                                                                                                                  | Phase 1 | 57  | 26-Apr-13 | 29-Apr-20 |
| GM-CSF | NCT00049517 | Combination Chemotherapy With or Without Monoclonal Antibody Therapy in Treating Patients With AML Leukemia                                                                                                            | Completed | Leukemia                                                                                                                                                                                                                                                                                                                                                                                                                                                                                                                                                                                                                                                                                                                                                                                                                                                                                                                         | Biological: sargramostim Drug: busulfan Drug: cyclophosphamide Drug: cytarabine Drug: gemtuzumab ozogamicin (GO) Drug: Daunorubicin Procedure: Autologous HCT Procedure: Allogeneic HCT                                                                                                                                                                                                                                                                                                                                                                                                                                                                        | Overall Survival (Induction Phase) Disease-free Survival (Consolidation Phase) Overall Survival (Consolidation Phase)                                                                                                                                                                                                                                                                                                                                                                                                                                                                                                                                                                                                                                                          | Phase 3 | 657 | Dec-02    | 17-Nov-20 |
| GM-CSF | NCT00274924 | Rituximab and Combination Chemotherapy in Treating Patients With Stage II, Stage III, or Stage IV Diffuse Large B-Cell Non-Hodgkin's                                                                                   | Completed | Lymphoma                                                                                                                                                                                                                                                                                                                                                                                                                                                                                                                                                                                                                                                                                                                                                                                                                                                                                                                         | Biological: filgrastim Biological: rituximab Drug: carboplatin Drug: cyclophosphamide Drug: doxorubicin hydrochloride Drug: etoposide Drug:                                                                                                                                                                                                                                                                                                                                                                                                                                                                                                                    | 2-year Progression-Free Survival (PFS) 5-year Overall Survival                                                                                                                                                                                                                                                                                                                                                                                                                                                                                                                                                                                                                                                                                                                 | Phase 2 | 100 | Apr-06    | 17-Nov-20 |
| GM-CSF | NCT02793544 | HLA-Mismatched Unrelated Donor Bone Marrow Transplantation With Post-Transplantation Cyclophosphamide                                                                                                                  | Completed | Myelodysplastic Syndrome (MDS) Chronic Lymphocytic Leukemia (CLL) Chemotherapy-sensitive Lymphoma Acute Lymphoblastic Leukemia (ALL) T Lymphoblastic Lymphoma Acute Myelogenous Leukemia (AML) Acute Biphenotypic Leukemia (ABL) Acute Undifferentiated Leukemia (AUL)                                                                                                                                                                                                                                                                                                                                                                                                                                                                                                                                                                                                                                                           | Drug: Fludarabine Drug: Cyclophosphamide 14.5 mg/kg/day IV on Days -6, -5 Radiation: Total Body Irradiation (TBI) 200cGy on Day -1 Procedure: Infusion of non-T-cell depleted bone marrow on Day 0 Drug: Busulfan Drug: Cyclophosphamide 50mg/kg/day IV on Days -2,-1 Drug: Cyclophosphamide 50mg/kg/day IV on Days -5,-4 Radiation: Total Body Irradiation (TBI) 200cGy twice a day on Days -3, -2, -1 Drug: Post-HCT Cyclophosphamide 50mg/kg IV on Day+3, +4 Drug: Sirolimus Drug: Mycophenolate mofetil Drug: G-CSF Drug: Pre-HCT Mesna on Days -6 and -5 Drug: Pre-HCT Mesna on Days -2 and -1 Drug: Pre-HCT Mesna on Days -5 and -4 Drug: Post-HCT Mesna | Overall Survival Progression-free survival Transplant-related mortality Cumulative incidence of neutrophil recovery Cumulative incidence of platelet recovery Cumulative incidence of primary graft failure Donor Chimerism Peripheral blood chimerism Cumulative incidence of acute GVHD Cumulative incidence of chronic GVHD Cumulative incidences of viral reactivations and infections Cumulative incidence of relapse/progression Cumulative incidences of thrombotic microangiopathy (TMA) and hepatic veno-occlusive disease (VOD) sinusoidal obstruction syndrome (SOS) Proportion of subjects proceeding to transplant Donor Selection Characteristics Time from search to donor identification Subgroup analysis of HIV-positive subjects Donor clonal hematopoiesis | Phase 2 | 80  | Dec-16    | 2-Dec-20  |

|        |             |                                                                                                                                   |           |                                                                                                                                                                                                                                                                                                                                                                                                                                               |                                                                                                                                                                                                                                                                                                                                                                                                             |                                                                                                                                                                                                                                                                                                                                                                                                                                                                                                                                                                                                                                                                                                                                                                                                                                                                                                                                                                                                                                                                                                                                                                                                                                                                                                                             |                 |     |           |           |
|--------|-------------|-----------------------------------------------------------------------------------------------------------------------------------|-----------|-----------------------------------------------------------------------------------------------------------------------------------------------------------------------------------------------------------------------------------------------------------------------------------------------------------------------------------------------------------------------------------------------------------------------------------------------|-------------------------------------------------------------------------------------------------------------------------------------------------------------------------------------------------------------------------------------------------------------------------------------------------------------------------------------------------------------------------------------------------------------|-----------------------------------------------------------------------------------------------------------------------------------------------------------------------------------------------------------------------------------------------------------------------------------------------------------------------------------------------------------------------------------------------------------------------------------------------------------------------------------------------------------------------------------------------------------------------------------------------------------------------------------------------------------------------------------------------------------------------------------------------------------------------------------------------------------------------------------------------------------------------------------------------------------------------------------------------------------------------------------------------------------------------------------------------------------------------------------------------------------------------------------------------------------------------------------------------------------------------------------------------------------------------------------------------------------------------------|-----------------|-----|-----------|-----------|
| GM-CSF | NCT02756572 | Early Allogeneic Hematopoietic Cell Transplantation in Treating Patients With Relapsed or Refractory High-Grade Myeloid Neoplasms | Completed | Blasts 10 Percent or More of Bone Marrow Nucleated Cells Chronic Myelomonocytic Leukemia-2 High Grade Malignant Neoplasm Myelodysplastic Syndrome Myelodysplastic Syndrome With Excess Blasts-2 Myeloid Neoplasm Previously Treated Myelodysplastic Syndrome Recurrent Acute Myeloid Leukemia Refractory Acute Myeloid Leukemia                                                                                                               | Drug: Cladribine Drug: Cyclosporine Drug: Cytarabine Biological: Filgrastim Drug: Fludarabine Phosphate Procedure: Allogeneic Hematopoietic Stem Cell Transplantation Other: Laboratory Biomarker Analysis Drug: Melphalan Drug: Mitoxantrone Hydrochloride Drug: Mycophenolate Mofetil Other: Questionnaire Administration Drug: Sirolimus Radiation: Total-Body Irradiation Drug: Melphalan Hydrochloride | Feasibility of early allogeneic hematopoietic cell transplant assessed by enrollment and incidence of early transplant Event free survival Factors that distinguish patients who receive early hematopoietic cell transplant Hematopoietic cell transplant Incidence of complete remission, defined as < 5% blasts on bone marrow biopsy with hematologic recovery, defined as absolute neutrophil count > 1000/uL and platelets > 100,000 /ml Incidence of acute graft versus host disease (graft versus host disease graded II, III, or IV) Incidence of complete remission by platelets, defined as platelets < 100,000/uL Incidence of complete remission with insufficient hematologic recovery, defined as absolute neutrophil count < 1000/uL or platelets < 100,000/uL Incidence of relapse, defined as > 5% blasts in bone marrow, flow cytometry, or manual differential OR treatment for active relapsed disease Incidence of treatment related mortality Overall survival Patient-reported outcomes assessed by European quality of life five dimension Patient-reported outcomes assessed by functional assessment cancer therapy-leukemia, and functional assessment cancer therapy-bone marrow transplant subscale Patient-reported outcomes assessed by MD Anderson Symptom Inventory Relapse free survival | Phase 2         | 30  | 22-Sep-16 | 8-Jul-20  |
| GM-CSF | NCT02451488 | Neoadjuvant Granulocyte-Macrophage Colony-Stimulating Factor (GM-CSF) in Cutaneous                                                | Completed | Melanoma                                                                                                                                                                                                                                                                                                                                                                                                                                      | Drug: GM-CSF Other: Standard of Care                                                                                                                                                                                                                                                                                                                                                                        | Th1/Th2 Normalized Gene Expression                                                                                                                                                                                                                                                                                                                                                                                                                                                                                                                                                                                                                                                                                                                                                                                                                                                                                                                                                                                                                                                                                                                                                                                                                                                                                          | Phase 4         | 8   | May-15    | 10-Feb-20 |
| GM-CSF | NCT04446052 | Phase III rhu_GM-CSF + 3 Induction Regimens in Adults With Acute Non-Lymphocytic Leukemia                                         | Completed | Adult Patients (Over 55) With Acute Non-Lymphocytic Leukemia                                                                                                                                                                                                                                                                                                                                                                                  | Drug: GM-CSF priming Drug: Placebo                                                                                                                                                                                                                                                                                                                                                                          | complete remission rates                                                                                                                                                                                                                                                                                                                                                                                                                                                                                                                                                                                                                                                                                                                                                                                                                                                                                                                                                                                                                                                                                                                                                                                                                                                                                                    | Phase 3         | 362 | 24-Apr-93 | 24-Jun-20 |
| GM-CSF | NCT04009941 | Efficacy and Safety of 4.5mg PEG-rhG-CSF Per Cycle in Preventing Neutropenia After Intensive Chemotherapy for Breast Cancer       | Completed | Breast Cancer Neutropenia                                                                                                                                                                                                                                                                                                                                                                                                                     | Drug: PEG-rhG-CSF                                                                                                                                                                                                                                                                                                                                                                                           | RDI for each EC chemotherapy Chemotherapeutic dose adjustment due to neutropenia overall completion rate of chemotherapy Incidence of febrile neutropenia Incidence of Grade 3/4 ACN reduction Duration of Grade 3/4 ACN reduction                                                                                                                                                                                                                                                                                                                                                                                                                                                                                                                                                                                                                                                                                                                                                                                                                                                                                                                                                                                                                                                                                          | Phase 4         | 104 | 1-Aug-19  | 28-Oct-20 |
| GM-CSF | NCT01700673 | Phase II Study of Azacitidine and Sargramostim as Maintenance Treatment for Poor-Risk AML or MDS                                  | Completed | Acute Myeloid Leukemia Myelodysplastic Syndrome                                                                                                                                                                                                                                                                                                                                                                                               | Drug: Azacitidine Biological: Sargramostim                                                                                                                                                                                                                                                                                                                                                                  | To evaluate the 2 year relapse free survival of patients 1. Describe and quantify the toxicity profile of the combination of 5AC and GM-CSF 2. Determine the impact on one-year RFS and overall survival for poor-risk myeloid disorders following maintenance                                                                                                                                                                                                                                                                                                                                                                                                                                                                                                                                                                                                                                                                                                                                                                                                                                                                                                                                                                                                                                                              | Phase 2         | 26  | Jun-13    | 5-Oct-20  |
| GM-CSF | NCT00002950 | Topotecan Plus Sargramostim in Treating Patients With Advanced                                                                    | Completed | Unspecified Adult Solid Tumor, Protocol Specific                                                                                                                                                                                                                                                                                                                                                                                              | Biological: sargramostim Drug: topotecan hydrochloride                                                                                                                                                                                                                                                                                                                                                      |                                                                                                                                                                                                                                                                                                                                                                                                                                                                                                                                                                                                                                                                                                                                                                                                                                                                                                                                                                                                                                                                                                                                                                                                                                                                                                                             | Phase 1 Phase   | 25  | 26-Sep-96 | 17-Aug-20 |
| GM-CSF | NCT00177047 | Autologous Transplant for Multiple Myeloma                                                                                        | Completed | Multiple Myeloma                                                                                                                                                                                                                                                                                                                                                                                                                              | Procedure: Stem Cell Transplant Drug: Cyclophosphamide + Mesna Drug: Melphalan Biological: Granulocyte-colony stimulating factor                                                                                                                                                                                                                                                                            | Comparison of Percentage of Patients Achieving a Complete Response Percentage of patients with extended disease-free survival Comparison of Overall Survival Transplant related mortality Incidence of relapse Incidence of disease progression Hematologic recovery Time to Progression Time to relapse Time to attainment of CR and CR+PR Duration of maintenance treatment Dropout rate from maintenance                                                                                                                                                                                                                                                                                                                                                                                                                                                                                                                                                                                                                                                                                                                                                                                                                                                                                                                 | Phase 2 Phase 3 | 363 | 20-Apr-04 | 3-Dec-20  |
| GM-CSF | NCT02921061 | Decitabine With GCLAM for Adults With Newly Diagnosed, Relapsed, or Refractory AML or High-Risk MDS                               | Completed | Mixed Phenotype Acute Leukemia Previously Treated Myelodysplastic Syndrome Recurrent Adult Acute Myeloid Leukemia Recurrent High Risk Myelodysplastic Syndrome Refractory Acute Myeloid Leukemia Refractory High Risk Myelodysplastic Syndrome Untreated Adult Acute Myeloid Leukemia                                                                                                                                                         | Drug: Cladribine Drug: Cytarabine Drug: Decitabine Biological: Filgrastim Other: Laboratory Biomarker Analysis Drug: Mitoxantrone Hydrochloride                                                                                                                                                                                                                                                             | Number of Participants Experiencing Dose Limiting Toxicities (DLTs) at the Maximum Tolerated Dose (MTD) for Decitabine When Given Together With G-CLAM Toxicities (DLTs) (Phase I) Number of Participants With Minimal Residual Disease Negative (MRDneg) Complete Remission (Phase II) Number of Participants Who Achieved Remission (Complete Remission [CR]/CR With Incomplete Peripheral Blood Count Recovery [CRI]) Number of Participants With Overall Survival Number of Participants With                                                                                                                                                                                                                                                                                                                                                                                                                                                                                                                                                                                                                                                                                                                                                                                                                           | Phase 1 Phase 2 | 28  | 17-Nov-16 | 17-Mar-20 |
| GM-CSF | NCT00211185 | A Study of ONTAK and CHOP in Newly Diagnosed, Peripheral T-Cell Lymphoma                                                          | Completed | Lymphoma, T-Cell, Peripheral                                                                                                                                                                                                                                                                                                                                                                                                                  | Drug: Denileukin diftitox Drug: Cyclophosphamide Drug: Doxorubicin Drug: Vincristine Drug: Prednisone Other: Pegfilgrastim                                                                                                                                                                                                                                                                                  | Summary of All Adverse Events by Frequency in Greater Than 20% of Treated Participants Summary of All Treatment-Related Adverse Events by Frequency in Greater Than 10% of Treated Participants Summary of Treatment-Related Adverse Events Greater Than or Equal to Grade 3 by System Organ Class Summary of Study Drug-Related (Possible, Probable, or Definite) Serious Adverse Events Overall Response in the Intent To Treat (ITT) Population Overall Response in the Efficacy Analyzable (EA) Population Duration of Response Progression-Free Survival Percentage of Participants                                                                                                                                                                                                                                                                                                                                                                                                                                                                                                                                                                                                                                                                                                                                    | Phase 2         | 49  | 14-Mar-04 | 18-Mar-20 |
| GM-CSF | NCT00002866 | Docetaxel and Epirubicin With and Without G-CSF in Treating Women With Metastatic Breast Cancer                                   | Completed | Breast Cancer Neutropenia                                                                                                                                                                                                                                                                                                                                                                                                                     | Biological: filgrastim Drug: docetaxel Drug: epirubicin hydrochloride                                                                                                                                                                                                                                                                                                                                       |                                                                                                                                                                                                                                                                                                                                                                                                                                                                                                                                                                                                                                                                                                                                                                                                                                                                                                                                                                                                                                                                                                                                                                                                                                                                                                                             | Phase 1         | 50  | 12-Aug-96 | 1-Apr-20  |
| GM-CSF | NCT00066443 | Epirubicin, Docetaxel, and Pegfilgrastim in Treating Women With Locally Advanced or                                               | Completed | Breast Cancer                                                                                                                                                                                                                                                                                                                                                                                                                                 | Biological: pegfilgrastim Drug: docetaxel Drug: epirubicin hydrochloride                                                                                                                                                                                                                                                                                                                                    | Toxic effects Response (phase II)                                                                                                                                                                                                                                                                                                                                                                                                                                                                                                                                                                                                                                                                                                                                                                                                                                                                                                                                                                                                                                                                                                                                                                                                                                                                                           | Phase 1 Phase 2 | 93  | 25-Feb-03 | 10-Nov-20 |
| GM-CSF | NCT00478361 | Gemcitabine, Paclitaxel, Doxorubicin in Metastatic or Unresectable Bladder Cancer With Decreased Kidney Function                  | Completed | Distal Urethral Cancer Metastatic Transitional Cell Cancer of the Renal Pelvis and Ureter Proximal Urethral Cancer Recurrent Bladder Cancer Recurrent Transitional Cell Cancer of the Renal Pelvis and Ureter Recurrent Urethral Cancer Regional Transitional Cell Cancer of the Renal Pelvis and Ureter Stage III Bladder Cancer Stage IV Bladder Cancer Transitional Cell Carcinoma of the Bladder Urethral Cancer Associated With Invasive | Drug: Gemcitabine hydrochloride Drug: Paclitaxel Drug: Doxorubicin hydrochloride Drug: Pegfilgrastim                                                                                                                                                                                                                                                                                                        | Objective Response Rate Overall Survival (OS) of Participants With a Continuous Complete Response, Partial Response and Stable Disease Safety and Efficacy of Same-day Pegfilgrastim                                                                                                                                                                                                                                                                                                                                                                                                                                                                                                                                                                                                                                                                                                                                                                                                                                                                                                                                                                                                                                                                                                                                        | Phase 2         | 40  | Apr-07    | 9-Oct-20  |

|        |             |                                                                                                                                                            |                        |                                                                                                                          |                                                                                                                                                                                                                                       |                                                                                                                                                                                                                                                                                                                                                                                                                                                                                                                                                                                                                                                                                                                                                                                    |         |      |           |                |
|--------|-------------|------------------------------------------------------------------------------------------------------------------------------------------------------------|------------------------|--------------------------------------------------------------------------------------------------------------------------|---------------------------------------------------------------------------------------------------------------------------------------------------------------------------------------------------------------------------------------|------------------------------------------------------------------------------------------------------------------------------------------------------------------------------------------------------------------------------------------------------------------------------------------------------------------------------------------------------------------------------------------------------------------------------------------------------------------------------------------------------------------------------------------------------------------------------------------------------------------------------------------------------------------------------------------------------------------------------------------------------------------------------------|---------|------|-----------|----------------|
| GM-CSF | NCT00345865 | Autologous Peripheral Stem Cell Transplant in Treating Patients With Non-Hodgkin's Lymphoma or Hodgkin's Lymphoma                                          | Completed              | Lymphoma                                                                                                                 | Drug: carmustine Drug: cyclophosphamide Drug: etoposide Procedure: peripheral blood stem cell transplantation Radiation:                                                                                                              | Number of Participants With 1 Year Progression Free Survival Number of Participants With 2 Years Progression Free Survival Number of Participants With 1 Year Overall Survival Number of Participants With 2 Years Overall Survival Number of Participants With Hematopoietic Recovery After Transplantation                                                                                                                                                                                                                                                                                                                                                                                                                                                                       | Phase 2 | 473  | 24-Aug-05 | 14-Jul-20      |
| GM-CSF | NCT01363206 | Granulocyte Macrophage-Colony Stimulating Factor and Ipilimumab as Therapy in Melanoma                                                                     | Completed              | Malignant Melanoma, Metastatic                                                                                           | Biological: Granulocyte-Macrophage Colony Stimulating Factor (GM-CSF) Biological: Ipilimumab                                                                                                                                          | Disease control rate at 24 weeks as defined by the immune-related Response Criteria (irRC) Assessment of immune activation as determined in the Companion Protocol Duration of disease control defined as the time from the date of the first treatment dose to the date of first documentation of disease progression as defined by irRC. Overall Survival (OS) Objective Response Rate (RR) Time to Objective response Duration of                                                                                                                                                                                                                                                                                                                                               | Phase 2 | 29   | May-11    | 19-Mar-20      |
| GM-CSF | NCT00524277 | Vaccine Therapy in Treating Patients With Breast Cancer                                                                                                    | Completed              | Breast Cancer                                                                                                            | Biological: GP2 peptide + GM-CSF vaccine Biological: GM-CSF (sargramostim) Biological: AE37 + GM-CSF vaccine                                                                                                                          | Disease recurrence Safety Immune Response                                                                                                                                                                                                                                                                                                                                                                                                                                                                                                                                                                                                                                                                                                                                          | Phase 2 | 456  | Jan-07    | 30-Mar-20      |
| GM-CSF | NCT01341652 | Phase II PAP Plus GM-CSF Versus GM-CSF Alone for Non-metastatic Prostate Cancer                                                                            | Completed              | Prostate Cancer                                                                                                          | Biological: pTVG-HP Biological: rhGM-CSF                                                                                                                                                                                              | 2-year Metastasis-Free Survival Rate Prostate Specific Antigen (PSA) Doubling Time (DT) Number and Severity of Observed Toxicities Median Time to Radiographic Disease Progression PSA Progression Free Survival                                                                                                                                                                                                                                                                                                                                                                                                                                                                                                                                                                   | Phase 2 | 99   | 23-May-11 | 25-Nov-20      |
| GM-CSF | NCT00343109 | Vaccine Therapy in Treating Patients Receiving Trastuzumab For HER2-Positive Stage IIIB-IV Breast Cancer                                                   | Completed              | HER2-positive Breast Cancer Male Breast Cancer Stage IIIB Breast Cancer Stage IIIC Breast Cancer Stage IVC Breast Cancer | Biological: HER-2/neu intracellular domain protein Procedure: leukapheresis Other: laboratory biomarker analysis Biological: sargramostim Other: immunologic technique Biological: synthetic tumor-associated peptide vaccine therapy | Relapse-free survival Safety as assessed by NCI CTCAE version 3.0 Immune response as assessed by HER2 specific T cell immunity and/or intramolecular epitope spreading Correlation of RFS to the generation of an immune response                                                                                                                                                                                                                                                                                                                                                                                                                                                                                                                                                  | Phase 2 | 38   | Mar-04    | 12-Feb-20      |
| IFN-α  | NCT01773889 | A Trial of Intravenous Denileukin Diftitox Plus Subcutaneous Pegylated IFNα-2A in Stage III or IV                                                          | Terminated             | Epithelial Ovarian Cancer Extraovarian Peritoneal Cancer Fallopian Tube Carcinoma                                        | Drug: Denileukin Diftitox/SC Pegylated IFN α-2a                                                                                                                                                                                       | Clinical Response Rate                                                                                                                                                                                                                                                                                                                                                                                                                                                                                                                                                                                                                                                                                                                                                             | Phase 2 | 2    | Jun-09    | April 10, 2018 |
| IFN-α  | NCT02447887 | Study of Ixazomib With Pegylated IFN-alpha 2b (pIFN) in Metastatic Renal Cell Carcinoma (mRCC)                                                             | Terminated             | Metastatic Renal Cell Carcinoma RCC                                                                                      | Drug: Ixazomib Drug: Pegylated IFN-alpha 2b                                                                                                                                                                                           | Non-hematologic Toxicity ≥ Grade 3 Per CTCAE v4 Except: Thrombocytopenia ≥ Grade 3 Per CTCAE v4 Grade 4 Neutropenia Per CTCAE v4; Associated With Fever or Hospitalization for Infection Grade 4 Neutropenia Per CTCAE v4; Lasting Longer Than 5 Days Any Toxicity Felt at the Investigator's Discretion to be Possibly or Probably Related to Ixazomib That Causes the Patient to Miss More Than 1 Dose of Either Ixazomib or pIFN in the First 28 Days Any Unacceptable Toxicity (UT) Defined as Any CTCAE v4 Grade 5 Toxicity, Grade 4 Neuropsychiatric Toxicity or Grade 4 Clinically Significant Non-hematologic Toxicity Thought to be Definitely, Probably or Possibly Related to Study Drug. Progression Free Survival Per RECIST 1.1 Progression Free Survival Per RECIST | Phase 3 | 3    | 14-Aug-15 | 26-Sep-19      |
| IFN-α  | NCT01462773 | Study of Patients With Stage IV Malignant Melanoma Using PS-341 (Bortezomib, Velcade) and Interferon-alpha-2b in Malignant                                 | Completed              | Melanoma                                                                                                                 | Drug: Bortezomib Drug: Interferon Alfa-2b                                                                                                                                                                                             | Determine Dose Limiting Toxicities (DLTs) of VELCADE When Administered in Combination With IFN-α-2b to Patients With Metastatic Malignant Melanoma. Document Any Objective Anti-tumor Responses and Time to Tumor Progression That May Occur in Response to This Treatment Regimen.                                                                                                                                                                                                                                                                                                                                                                                                                                                                                                | Phase 3 | 16   | Jan-06    | 13-Jan-15      |
| IFN-α  | NCT03547154 | Polyethylene Glycol Interferon Alfa-2b (PEG Intron) Versus Interferon Alfa-2b (INTRON® A) in the Treatment of Newly Diagnosed Chronic Myelogenous Leukemia | Terminated             | Chronic Myelogenous Leukemia                                                                                             | Biological: Pegylated interferon alfa-2b Biological: Interferon alfa-2b                                                                                                                                                               | Number of Participants With Cytogenetic Responses to PEG Intron and INTRON A at 12 Months Number of Participants With Cytogenetic Response (CR) to PEG Intron and Intron A at 6 Months Number of Participants With Hematologic Responses to PEG Intron and Intron A at 6 Months Number of Participants With Overall Survival                                                                                                                                                                                                                                                                                                                                                                                                                                                       | Phase 4 | 344  | 22-Oct-98 | 12-Aug-19      |
| IFN-α  | NCT02159482 | Pilot Study of Interferon Alfa for Patients Who Have Received                                                                                              | Terminated             | Cancer                                                                                                                   | Drug: Interferon Alfa-2a                                                                                                                                                                                                              | Proportion of Clinical Responders (Complete Response + Partial Response) Proportion of Patients Experiencing an Increase in the Magnitude of the Tumor Antigen-specific Immune                                                                                                                                                                                                                                                                                                                                                                                                                                                                                                                                                                                                     | Phase 2 | 11   | Nov-05    | 25-Jul-14      |
| IFN-α  | NCT00003641 | High-Dose Interferon Alfa in Treating Patients With Stage II or Stage III Melanoma                                                                         | Active, not recruiting | Melanoma (Skin)                                                                                                          | Biological: interferon alfa-2b Other: observation                                                                                                                                                                                     | 5-year Relapse-free Survival Rate 5-year Overall Survival Rate                                                                                                                                                                                                                                                                                                                                                                                                                                                                                                                                                                                                                                                                                                                     | Phase 2 | 1150 | Dec-98    | 13-Mar-19      |
| IFN-α  | NCT00026221 | Bevacizumab With or Without Interferon Alfa in Treating Patients With Metastatic Malignant Melanoma                                                        | Completed              | Recurrent Melanoma Stage IV Skin Melanoma                                                                                | Biological: Recombinant Interferon Alfa Biological: Bevacizumab                                                                                                                                                                       | Objective Response Rate Progression-free Survival Comparison of Plasma Levels of VEGF Following Administration of Bevacizumab Alone or in Combination With IFN-alfa New Vessel Formation in Patient Tumor Samples                                                                                                                                                                                                                                                                                                                                                                                                                                                                                                                                                                  | Phase 4 | 57   | Nov-01    | 17-Mar-16      |
| IFN-α  | NCT00561912 | Low Dose Decitabine + Interferon Alfa-2b in Advanced Renal Cell                                                                                            | Terminated             | Renal Cell Carcinoma                                                                                                     | Drug: Decitabine Drug: Interferon Alfa-2b                                                                                                                                                                                             | Progression-free Survival (PFS) Times                                                                                                                                                                                                                                                                                                                                                                                                                                                                                                                                                                                                                                                                                                                                              | Phase 2 | 2    | Oct-07    | 26-Dec-11      |
| IFN-α  | NCT00062010 | Interferon Alfa, Isotretinoin, and Paclitaxel in Treating Patients With Recurrent Small Cell Lung Cancer                                                   | Completed              | Lung Cancer                                                                                                              | Biological: interferon alfa Drug: 13-cis-retinoic acid Drug: paclitaxel                                                                                                                                                               | Response by RECIST Criteria (v 1.0) Survival Progression-free Survival                                                                                                                                                                                                                                                                                                                                                                                                                                                                                                                                                                                                                                                                                                             | Phase 2 | 37   | Feb-04    | 8-Oct-15       |
| IFN-α  | NCT00085436 | DC Vaccine Combined With IL-2 and IFN α -2a in Treating Patients With mRCC                                                                                 | Completed              | Kidney Cancer                                                                                                            | Biological: Aldesleukin Biological: autologous tumor cell vaccine Biological: recombinant interferon alfa                                                                                                                             | Clinical Response as Measured by RECIST Immunity as Measured by T-cell and Antibody Responses to the Tumor                                                                                                                                                                                                                                                                                                                                                                                                                                                                                                                                                                                                                                                                         | Phase 2 | 18   | Dec-03    | 26-Jun-18      |
| IFN-α  | NCT00613509 | Study of a Multi-Antigen Therapeutic Vaccine in Patients With Metastatic Melanoma                                                                          | Terminated             | Melanoma Cancer                                                                                                          | Biological: ALVAC(2) Melanoma multi-antigen therapeutic vaccine Biological: Intron A, Interferon alpha -2b                                                                                                                            | Summary of Disease Progression in Study Participants, Intent-to-treat Population Progression-Free Survival Time by Response Evaluation Criteria in Solid Tumor (RECIST) Criteria in the Intent-to-treat Population Best Overall Objective Response as Number of Participants Responding in the Intent-to-treat Population Best Overall Objective Response in the Intent-to-treat Population Best Overall Objective Response as Mean Duration of Response (Weeks) in the Intent-to-treat Population Number of Participants Reporting a Grade 3 or Grade 4 Adverse Events by Preferred Term                                                                                                                                                                                          | Phase 2 | 23   | Jun-08    | April 14, 2016 |

|       |             |                                                                                                                                                                    |                        |                                                                                                                                                                                                                         |                                                                                                                       |                                                                                                                                                                                                                                                                                                                                                                                                                                                                                                                                                                                                                                                                                                                                                                                                |         |      |                |                |
|-------|-------------|--------------------------------------------------------------------------------------------------------------------------------------------------------------------|------------------------|-------------------------------------------------------------------------------------------------------------------------------------------------------------------------------------------------------------------------|-----------------------------------------------------------------------------------------------------------------------|------------------------------------------------------------------------------------------------------------------------------------------------------------------------------------------------------------------------------------------------------------------------------------------------------------------------------------------------------------------------------------------------------------------------------------------------------------------------------------------------------------------------------------------------------------------------------------------------------------------------------------------------------------------------------------------------------------------------------------------------------------------------------------------------|---------|------|----------------|----------------|
| IFN-α | NCT00467077 | Gefitinib and PEG-Interferon Alfa-2b in Treating Patients With Unresectable or Metastatic Kidney                                                                   | Terminated             | Kidney Cancer                                                                                                                                                                                                           | Biological: PEG-interferon alfa-2b Drug: gefitinib                                                                    | Six-month Progression-free Survival Number of Participants With Overall Response as Measured by RECIST Criteria Progression-Free Survival Overall Survival                                                                                                                                                                                                                                                                                                                                                                                                                                                                                                                                                                                                                                     | Phase 2 | 21   | Sep-04         | 17-Mar-17      |
| IFN-α | NCT01460875 | Recombinant Interferon Alfa-2b in Treating Patients With Melanoma                                                                                                  | Completed              | Stage IA Skin Melanoma Stage IB Skin Melanoma Stage IIA Skin Melanoma Stage IIB Skin Melanoma Stage IIC Skin Melanoma Stage IIIA Skin Melanoma Stage IIIB Skin Melanoma Stage IIIC Skin Melanoma Stage IV Skin Melanoma | Biological: recombinant interferon alfa-2b Other: laboratory biomarker analysis                                       | Level of Activated STAT1(Phospho-STAT1) Number of Patients With Adverse Events Percentage of Patients With Correlation Between STAT1 Phosphorylation and Interferon Alfa Gene Regulation Effect of Dose-reduction on Expression of Interferon Alfa Stimulated Genes Effect of Dose-reduction on Interferon Alfa Gene Expression Effect of Dose-reduction on Interferon Alfa Gene Expression Through Marker CD69 Effect of Dose-reduction on Interferon Alfa Gene Expression at Dose Level 4MU Clinical Role of Tumor Sensitivity to Recombinant Interferon Alfa-2b Using Cellular Levels of Jak-STAT Signaling                                                                                                                                                                                 | Phase 2 | 34   | April 22, 2008 | 2-Nov-18       |
| IFN-α | NCT00724061 | Study of Pegylated Interferon-Alfa 2b in Combination With PUVA Therapy In CTCL                                                                                     | Terminated             | Lymphoma                                                                                                                                                                                                                | Biological: Pegylated interferon α-2b Other: Psoralens with ultraviolet light A Other: Narrowband-ultraviolet light B | Number of Dose Limiting Toxicities (DLTs) Observed During Dose Escalation of PEG-IFN-α -2b Change in Total Health-related Quality of Life Score Using the Functional Assessment of Cancer Therapy - Biologic Response Modifier (FACT-BRM) Number of Patients Exhibiting a Complete Response To Evaluate the Duration of Response                                                                                                                                                                                                                                                                                                                                                                                                                                                               | Phase 3 | 7    | Sep-08         | 12-Dec-18      |
| IFN-α | NCT00333840 | Safety and Efficacy of Imatinib Versus Interferon-α Plus Cytarabine in Patients With Newly Diagnosed Philadelphia Chromosome Positive Chronic Myelogenous Leukemia | Completed              | Chronic Myelogenous Leukemia                                                                                                                                                                                            | Drug: imatinib mesilate Drug: interferon-alpha (INF-α) Drug: cytarabine (ARA-C)                                       | Kaplan-Meier Estimates of Overall Survival (All Randomized Participants) Kaplan Meier Estimates of Event Free Survival (All Randomized Participants) Percentage of Participants With Event Free Survival Events (All Randomized Participants) Kaplan Meier Estimates of Time to Progression to Accelerated Phase (AP) or Blast Crisis (BC) (All Randomized Participants) Percentage of Participants With Best Cytogenetic Response (First-line Treatment) Percentage of Participants With Best Cytogenetic Response (Second-line Treatment) Number of Participants With Serious Adverse Events as a Measure of Safety (First-line Treatment) Number of Participants With Serious Adverse Events as a Measure of Safety (Second-line Treatment) Percentage of Participants With Major Molecular | Phase 2 | 1106 | Jun-00         | 14-Oct-13      |
| IFN-α | NCT00049530 | PEG-Interferon Alfa-2b in Treating Patients With Stage IV Melanoma                                                                                                 | Completed              | Melanoma (Skin)                                                                                                                                                                                                         | Biological: PEG-interferon alfa-2b                                                                                    | Plasma b-FGF Level Response Non-progression Rate (Clinical Response to Peginterferon Alfa-2b) Progression Free Survival Overall Survival                                                                                                                                                                                                                                                                                                                                                                                                                                                                                                                                                                                                                                                       | Phase 3 | 32   | Sep-03         | 28-Oct-15      |
| IFN-α | NCT02218164 | Capecitabine or 5-FU With Pegylated Interferon Alpha-2b in Unresectable/Metastatic Cutaneous Squamous Cell Carcinoma                                               | Active, not recruiting | Squamous Cell Carcinoma of Skin Carcinoma, Squamous Cell                                                                                                                                                                | Drug: Pegylated Interferon alpha-2b Drug: Capecitabine Drug: 5-FU                                                     | Objective Response Rate (ORR) Progression Free Survival (PFS) Overall Survival (OS) Occurrence of Treatment Related Serious Adverse Events (SAEs)                                                                                                                                                                                                                                                                                                                                                                                                                                                                                                                                                                                                                                              | Phase 2 | 8    | 12-Aug-14      | 9-Sep-19       |
| IFN-α | NCT03554005 | Extended Administration of Polyethylene Glycol (PEG) Interferon Alfa-2b in Participants With Solid Tumors (C/197-349/MK-4031-009)                                  | Completed              | Neoplasms                                                                                                                                                                                                               | Drug: PEG Interferon Alfa-2b Drug: Acetaminophen                                                                      | Number of Participants Who Experienced an Adverse Event Number of Participants Who Discontinued Treatment Due to an Adverse Event Best Objective Response                                                                                                                                                                                                                                                                                                                                                                                                                                                                                                                                                                                                                                      | Phase 2 | 29   | 29-Dec-97      | 15-Jul-19      |
| IFN-α | NCT02829775 | A Study of Continued Treatment Among Participants Who Have Responded to Peginterferon Alfa-2a (Pegasys ® ) or Recombinant Interferon Alfa-2a (Roferon-A®) in       | Completed              | Chronic Myelogenous Leukemia Malignant Melanoma Renal Cell Carcinoma                                                                                                                                                    | Drug: Pegylated Interferon Alfa-2a Drug: Recombinant Interferon Alfa 2a                                               | Number of Participants With Serious Adverse Events (SAEs) Number of Participants With Overall Tumor Response                                                                                                                                                                                                                                                                                                                                                                                                                                                                                                                                                                                                                                                                                   | Phase 3 | 9    | Jan-04         | 9-Jan-17       |
| IFN-α | NCT00525031 | Temozolomide Alone or With Pegylated Interferon-Alpha 2b (PGI) in Melanoma Patients                                                                                | Completed              | Melanoma                                                                                                                                                                                                                | Drug: Temozolomide (TMZ) Drug: Pegylated Interferon Alpha-2b (PGI)                                                    | Response to Neoadjuvant Therapy by Therapy Arms: Clinical Response Rates (CR + PR + SD) Response to Neoadjuvant Therapy: Overall Clinical Responses                                                                                                                                                                                                                                                                                                                                                                                                                                                                                                                                                                                                                                            | Phase 3 | 55   | Aug-06         | 2-Jul-17       |
| IFN-α | NCT00138151 | Isotretinoin, Interferon Alpha-2b, and Paclitaxel in Stage IV, Recurrent, or Persistent Cervical Cancer                                                            | Terminated             | Cervical Cancer                                                                                                                                                                                                         | Biological: recombinant interferon alpha-2b Drug: isotretinoin Drug: paclitaxel                                       | Response Rate (Complete and Partial) The Effect of the Regimen on Bcl-2 Family Proteins in Biopsy Specimens and Correlation With Peripheral Blood Mononuclear Cell Bcl-2 Levels. The Effect of the Regimen on Raf-1 Kinase Phosphorylation in Biopsy                                                                                                                                                                                                                                                                                                                                                                                                                                                                                                                                           | Phase 2 | 33   | Mar-01         | 20-Nov-13      |
| IFN-α | NCT00036569 | A Phase II Study of Pegylated Interferon Alfa 2b (PEG-Intron(Trademark)) in Children With Diffuse Pontine Gliomas                                                  | Completed              | Diffuse Intrinsic Pontine Glioma                                                                                                                                                                                        | Drug: Peginterferon alfa-2a                                                                                           | Two Year Survival of Pediatric Patients With Diffuse Pontine Gliomas Median Time to Progression Number of Participants With Adverse Events Mean Quality of Life (QOL) Score at Baseline and Follow-Up Number of Participants With a Metabolic and Biological Change in the Brainstem Through Magnetic Resonance Imaging (MRI) Techniques                                                                                                                                                                                                                                                                                                                                                                                                                                                       | Phase 2 | 32   | May-02         | 13-Feb-12      |
| IFN-α | NCT00854581 | Zidovudine, Interferon Alfa-2b, PEG-Interferon Alfa-2b in Patients With HTLV-I Associated Adult T-Cell Leukemia/Lymphoma                                           | Terminated             | Lymphoma Precancerous/Nonmalignant Condition                                                                                                                                                                            | Biological: PEG-interferon alfa-2b Biological: Interferon alfa-2b Drug: Valproic Acid Drug: Zidovudine                | Number of Patients Achieving Clinical Response to Protocol Therapy Who Lack IRF-4 and/or c-Rel Expression Presence of Minimal Residual Disease at 3 and 6 Months of Maintained Remission and at 1 Year Post Initiation of Therapy Expressions of c-Rel, IRF-4 and Other Molecular Events in Participants Number of Participants Exhibiting NF-κB Inhibition Upon Treatment With AZT in Vivo The Effect of Valproic Acid Therapy on Persistence of Clonal Disease in Patients Who Achieve Clinical Remission Failure-free                                                                                                                                                                                                                                                                       | Phase 4 | 13   | Nov-07         | April 18, 2018 |
| IFN-α | NCT00015847 | Imatinib Mesylate and Interferon Alfa in Treating Patients With Chronic Myelogenous Leukemia                                                                       | Terminated             | Leukemia                                                                                                                                                                                                                | Biological: recombinant interferon alfa Drug: imatinib mesylate                                                       | Complete Cytogenetic Response at 6 and 12 Months (Phase II) Minor Cytogenetic Response at 6 and 12 Months (Phase II) Complete Hematologic Response at 6 and 12 Months (Phase II) Molecular Response in Patients With Complete Cytogenetic Response at 6 and 12 Months (Phase II) Treatment-related Toxicity (i.e., Grade 3 or 4 Nonhematologic Toxicity) as Measured by NCI CTCAE v3.0 (Phase I) Major Cytogenetic                                                                                                                                                                                                                                                                                                                                                                             | Phase 1 | 25   | April 2001     | 20-Aug-12      |
| IFN-α | NCT02155322 | A Phase II Study of Pegylated Interferon Alfa-2b for the Adjuvant Treatment of Melanoma Subjects in Russia (MK-4031-400)                                           | Completed              | Melanoma                                                                                                                                                                                                                | Biological: Pegylated Interferon Alfa-2b                                                                              | Percentage of Participants Experiencing Adverse Events (AEs) Percentage of Participants Discontinuing Study Drug Because of AEs                                                                                                                                                                                                                                                                                                                                                                                                                                                                                                                                                                                                                                                                | Phase 3 | 33   | 19-Aug-14      | 23-Aug-18      |

|       |             |                                                                                                                                                               |                        |                                                                                                                                                                                  |                                                                                                                                                                                                                                                               |                                                                                                                                                                                                                                                                                                                                                                                                                                                                                                                                                                                                                                                                                                                                                                                                                                                                                                                                                                                                                                                                                                                                                                                                                                                                                                                                                                                                                                                                         |         |           |           |           |
|-------|-------------|---------------------------------------------------------------------------------------------------------------------------------------------------------------|------------------------|----------------------------------------------------------------------------------------------------------------------------------------------------------------------------------|---------------------------------------------------------------------------------------------------------------------------------------------------------------------------------------------------------------------------------------------------------------|-------------------------------------------------------------------------------------------------------------------------------------------------------------------------------------------------------------------------------------------------------------------------------------------------------------------------------------------------------------------------------------------------------------------------------------------------------------------------------------------------------------------------------------------------------------------------------------------------------------------------------------------------------------------------------------------------------------------------------------------------------------------------------------------------------------------------------------------------------------------------------------------------------------------------------------------------------------------------------------------------------------------------------------------------------------------------------------------------------------------------------------------------------------------------------------------------------------------------------------------------------------------------------------------------------------------------------------------------------------------------------------------------------------------------------------------------------------------------|---------|-----------|-----------|-----------|
| IFN-α | NCT00738530 | A Study of Avastin (Bevacizumab) Added to Interferon Alfa-2a (Roferon) Therapy in Patients With Metastatic Renal Cell Cancer With Nephrectomy                 | Completed              | Renal Cell Cancer                                                                                                                                                                | Drug: Bevacizumab [Avastin]Drug: Interferon alfa 2a [Roferon]Drug: Placebo                                                                                                                                                                                    | Percentage of Participants Who Died Overall Survival (OS) Duration Percentage of Participants With Disease Progression or Death Progression Free Survival (PFS) According to Modified Response Evaluation Criteria in Solid Tumors (mRECIST) Time to Progression (TTP) According to Modified Response Evaluation Criteria in Solid Tumors (mRECIST) Percentage of Participants With Treatment Failure Time to Treatment Failure (TTF) According to Modified Response Evaluation Criteria in Solid Tumors (mRECIST) Percentage of Participants With Objective Response According to mRECIST Percentage of Participants With Best Overall Response According to Modified Response Evaluation Criteria in Solid Tumors (mRECIST) Change From Baseline in                                                                                                                                                                                                                                                                                                                                                                                                                                                                                                                                                                                                                                                                                                                   | Phase 3 | 649       | Jun-04    | 23-Jun-16 |
| IFN-α | NCT03552549 | SCH 54031 PEG12000 Interferon Alfa-2b (PEG Intron, MK-4031) vs. INTRON®A (SCH 30500, MK-2958) as Adjuvant Therapy for Melanoma (C98-135, MK-4031-002)         | Terminated             | Melanoma                                                                                                                                                                         | Biological: PEG-Intron Biological: INTRON A                                                                                                                                                                                                                   | Progression-free Survival (PFS) Overall Survival                                                                                                                                                                                                                                                                                                                                                                                                                                                                                                                                                                                                                                                                                                                                                                                                                                                                                                                                                                                                                                                                                                                                                                                                                                                                                                                                                                                                                        | Phase 3 | 126       | 5-Aug-98  | 24-Jul-19 |
| IFN-α | NCT01708941 | Ipilimumab With or Without High-Dose Recombinant Interferon Alfa-2b in Treating Patients With Stage III-IV Melanoma That Cannot Be Removed                    | Active, not recruiting | Recurrent Melanoma Stage IIIA Cutaneous Melanoma AJCC v7 Stage IIIB Cutaneous Melanoma AJCC v7 Stage IIIC Cutaneous Melanoma AJCC v7 Stage IVC Cutaneous Melanoma AJCC v6 and v7 | Biological: Ipilimumab Other: Laboratory Biomarker Analysis Biological: Recombinant Interferon Alfa-2b                                                                                                                                                        | Progression-free Survival (PFS) Progression-free Survival Overall Survival (OS) Overall Survival                                                                                                                                                                                                                                                                                                                                                                                                                                                                                                                                                                                                                                                                                                                                                                                                                                                                                                                                                                                                                                                                                                                                                                                                                                                                                                                                                                        | Phase 3 | 88        | 18-Jan-13 | 30-Jan-20 |
| IFN-α | NCT00569127 | Octreotide Acetate and Recombinant Interferon Alfa-2b or Bevacizumab in Treating Patients With Metastatic or Locally Advanced, High-Risk Neuroendocrine Tumor | Active, not recruiting | Atypical Carcinoid Tumor Carcinoid Tumor Colorectal Neuroendocrine Tumor G1 Gastric Neuroendocrine Tumor G1 Neuroendocrine Neoplasm                                              | Biological: Bevacizumab Other: Laboratory Biomarker Analysis Drug: Octreotide Acetate Biological: Recombinant Interferon Alfa-2b                                                                                                                              | Central Review-based Progression-Free Survival Overall Survival Time to Treatment Failure Local Progression-Free Survival (Investigator Assessed) Objective Response (Confirmed and Unconfirmed Complete Response and Partial Response) Number of Patients With Grade 3 Through Grade 5 Adverse Events That Are Related to Study Drug                                                                                                                                                                                                                                                                                                                                                                                                                                                                                                                                                                                                                                                                                                                                                                                                                                                                                                                                                                                                                                                                                                                                   | Phase 2 | 427       | 1-Dec-07  | 26-Dec-19 |
| IFN-α | NCT00911443 | Thymosin Alpha 1, Interferon Alpha, or Both, in Combination With Dacarbazine in Patients With Malignant Melanoma                                              | Completed              | Malignant Melanoma                                                                                                                                                               | Biological: Dacarbazine + Interferon alpha + Thymosin-alpha-1 1.6 mg Biological: Dacarbazine + Interferon alpha + Thymosin-alpha-1 3.2 mg Biological: Dacarbazine + Interferon alpha + Thymosin-alpha-1 6.4 mg Biological: Dacarbazine + Thymosin-alpha-1 3.2 | Overall Tumor Response Overall Survival Progression Free Survival                                                                                                                                                                                                                                                                                                                                                                                                                                                                                                                                                                                                                                                                                                                                                                                                                                                                                                                                                                                                                                                                                                                                                                                                                                                                                                                                                                                                       | Phase 3 | 488       | Jul-02    | 9-Jul-09  |
| IFN-α | NCT00068575 | Chemotherapy, Interferon Alfa, and Radiation Therapy in Treating Patients Who Have Undergone Surgery For Pancreatic Cancer                                    | Completed              | Pancreatic Cancer                                                                                                                                                                | Biological: Recombinant Interferon Alfa Drug: Cisplatin Drug: Fluorouracil Radiation: Radiation Therapy                                                                                                                                                       | Median Overall Survival (OS)                                                                                                                                                                                                                                                                                                                                                                                                                                                                                                                                                                                                                                                                                                                                                                                                                                                                                                                                                                                                                                                                                                                                                                                                                                                                                                                                                                                                                                            | Phase 2 | 29        | May-02    | 15-Feb-12 |
| IFN-α | NCT00083889 | SU011248 Versus Interferon-Alfa As First-Line Systemic Therapy For Patients With Metastatic Renal Cell Carcinoma                                              | Completed              | Carcinoma, Renal Cell                                                                                                                                                            | Drug: Interferon-alfa Drug: SU011248                                                                                                                                                                                                                          | Progression-Free Survival (PFS), Core Radiology Assessment Progression-Free Survival (PFS), Investigator's Assessment Objective Response, Core Radiology Assessment Objective Response, Investigator's Assessment Overall Survival (OS) Time to Tumor Progression (TTP), Core Radiology Assessment Time to Tumor Progression (TTP), Investigator's Assessment Duration of Response (DR), Core Radiology Assessment Duration of Response (DR), Investigator's Assessment FACT-Kidney Symptom Index-Disease Related Symptoms (FKSI-DRS) Subscale FACT-Kidney Symptom Index (FKSI) Subscale Functional Assessment of Cancer Therapy-General (FACT-G) Functional Assessment of Cancer Therapy-General (FACT-G): Physical Well Being (PWB) Subscale Functional Assessment of Cancer Therapy-General (FACT-G): Social/Family Well Being (SWB) Subscale Functional Assessment of Cancer Therapy-General (FACT-G): Emotional Well Being (EWB) Subscale Functional Assessment of Cancer Therapy-General (FACT-G): Functional Well Being (FWB) Subscale EuroQoL Five Dimension (EQ-5D) Health State Index Euro-QoL Visual Analog Scale (EQ-VAS) Plasma Concentrations of Soluble Proteins: Plasma VEGF-A, Plasma VEGF-C, Plasma sVEGFR-3, PLASMA IL-8, and PLASMA bFGF That May be Associated With Tumor Proliferation or Angiogenesis Plasma Concentrations of Soluble Proteins: Plasma Basic Fibroblast Growth Factor (bFGF) That May be Associated With Tumor Proliferation or | Phase 3 | 750       | Aug-04    | 26-Jan-10 |
| IFN-α | NCT00719264 | Safety and Efficacy of Bevacizumab Plus RAD001 Versus Interferon Alfa-2a and Bevacizumab for the First-line Treatment in Adult Patients With Kidney Cancer    | Completed              | Carcinoma Adenocarcinoma Renal Carcinoma Hypernephroid                                                                                                                           | Drug: RAD001(everolimus) Drug: interferon alfa-2a Drug: bevacizumab                                                                                                                                                                                           | Progression-free Survival (PFS) of Participants Who Received RAD001 Plus Bevacizumab Versus Participants Who Received IFN Plus Bevacizumab Overall Survival (OS) Treatment Effect in Participants Who Received RAD001 Plus Bevacizumab Versus Participants Who Received IFN Plus Bevacizumab Best Overall Response in Participants Who Received RAD001 Plus Bevacizumab Versus Participants Who Received IFN Plus Bevacizumab Response Duration Differences in Participants Who Received RAD001 Plus Bevacizumab Versus Participants Who Received IFN Plus Bevacizumab Number of Participants Who Experienced Adverse Events (AEs), Serious Adverse Events and Deaths Time to Definitive Deterioration of the Functional Assessment of Cancer Therapy Kidney Symptom Index, Disease Related Symptoms (FKSI-DRS) Risk Score by at Least 2 Score Units Time to Definitive Deterioration of the Global Health Status and the Physical Functioning (PF) Subscale Scores of the European Organization for the Research and Treatment of Cancer (EORTC)-Core Quality of Life Questionnaire (QLQ-C30) by at Least                                                                                                                                                                                                                                                                                                                                                              | 365     | 12-Nov-08 | 20-Mar-17 |           |
| IFN-α | NCT00913913 | Bevacizumab, Autologous Tumor/DC Vaccine, IL-2 and IFN α -2b in Metastatic Renal Cell Carcinoma                                                               | Terminated             | Metastatic Renal Cell Carcinoma                                                                                                                                                  | Biological: DC vaccine Drug: Bevacizumab Biological: IL-2 Biological: IFN                                                                                                                                                                                     | Progression Free Survival To Characterize the Number of Participants With Clinical and Autoimmune Related Toxicity of Treatment                                                                                                                                                                                                                                                                                                                                                                                                                                                                                                                                                                                                                                                                                                                                                                                                                                                                                                                                                                                                                                                                                                                                                                                                                                                                                                                                         | Phase 3 | 8         | Feb-09    | 1-Dec-15  |

|       |             |                                                                                                                                                                                                            |            |                                                                                                                                                 |                                                                                                                                                                                                                                                           |                                                                                                                                                                                                                                                                                                                                                      |         |     |            |                |
|-------|-------------|------------------------------------------------------------------------------------------------------------------------------------------------------------------------------------------------------------|------------|-------------------------------------------------------------------------------------------------------------------------------------------------|-----------------------------------------------------------------------------------------------------------------------------------------------------------------------------------------------------------------------------------------------------------|------------------------------------------------------------------------------------------------------------------------------------------------------------------------------------------------------------------------------------------------------------------------------------------------------------------------------------------------------|---------|-----|------------|----------------|
| IFN-α | NCT01658813 | 5-Fluorouracil Followed by Interferon-α-2b in Previously-treated Metastatic Gastrointestinal, Kidney, Dacarbazine and Recombinant Interferon Alfa-2b in Treating Patients With Primary Uveal Melanoma With | Completed  | Gastrointestinal Cancer Metastatic Renal Cell Cancer Metastatic Non Small Cell Lung Cancer Metastatic                                           | Drug: 5-Fluorouracil and Interferon                                                                                                                                                                                                                       | Progression Free Survival Number of Responses Response Rate Median Duration of Response Median Survival                                                                                                                                                                                                                                              | Phase 2 | 18  | Jul-12     | 21-Mar-18      |
| IFN-α | NCT01100528 | Study Comparing Bevacizumab + Temeirolium vs. Bevacizumab + Interferon-Alfa In Advanced Renal Cell Carcinoma Subjects                                                                                      | Completed  | Ciliary Body and Choroid Melanoma, Medium/Large Size Ciliary Body and Choroid Melanoma, Small Size Iris Melanoma Recurrent Intraocular Melanoma | Biological: recombinant interferon alfa-2b Drug: dacarbazine Other: laboratory biomarker analysis                                                                                                                                                         | Number of Patients With Disease-free Survival (DFS) Number of Participants With Toxicity or Grade 4 Adverse Events Via CTCAE Version 3.0 Changes in Plasma Biomarkers and Their Association With DFS                                                                                                                                                 | Phase 2 | 38  | 11-Nov-09  | 26-Feb-19      |
| IFN-α | NCT00631371 | Sorafenib Tosylate With or Without Recombinant Interferon Alfa-2b in Treating Patients With Metastatic Kidney Cancer                                                                                       | Completed  | Renal Cell Carcinoma                                                                                                                            | Drug: Sorafenib Tosylate Biological: Recombinant Interferon Alfa-2b Other: Laboratory Biomarker Analysis                                                                                                                                                  | Progression-Free Survival (PFS): Independent-Assessment Progression-Free Survival (PFS): Investigator-Assessment Percentage of Participants With Objective Response (Complete Response/Partial Response): Independent-Assessment Overall Survival (OS)                                                                                               | Phase 2 | 791 | April 2008 | April 27, 2016 |
| IFN-α | NCT00126594 | Celecoxib and Recombinant Interferon Alfa-2b in Metastatic Kidney Cancer Who Have Undergone Surgery                                                                                                        | Completed  | Renal Cell Cancer Stage IV Renal Cell Cancer                                                                                                    | Drug: celecoxib Biological: recombinant interferon alfa-2b Other: polymerase chain reaction Other: laboratory biomarker analysis Other: reverse transcriptase-polymerase chain reaction Other: immunologic technique Other: immunohistochemistry staining | Objective Response Rate (ORR) Evaluated Using Response Evaluation Criteria in Solid Tumors (RECIST) Selected Grade 3-4 Adverse Events Using NCI Common Terminology Criteria for Adverse Events (CTCAE) Version 4.0 Progression-free Survival Median Overall Survival (OS) Duration of Response for Participants With Stable Disease (N=37)           | Phase 2 | 80  | Jun-05     | 16-Sep-16      |
| IFN-α | NCT00047879 | Phase II Trial of Peginterferon Alpha-2b and Thalidomide in Adults With Recurrent Gliomas                                                                                                                  | Completed  | Glioma                                                                                                                                          | Biological: PEG-interferon alfa-2b Drug: Thalidomide                                                                                                                                                                                                      | Progression-free Survival Number of Participants With Complete or Partial Response The Number of Participants With Adverse Events                                                                                                                                                                                                                    | Phase 3 | 7   | Oct-02     | 26-Oct-11      |
| IFN-α | NCT00065468 | Phase II Study Incorporating Pegylated Interferon In the Treatment For Children With High-Risk                                                                                                             | Completed  | Carcinoma, Renal Cell Kidney Neoplasms                                                                                                          | Drug: Interferon Alfa Drug: CCI-779 Drug: Interferon Alfa and CCI-779                                                                                                                                                                                     | Overall Survival (OS) Progression-Free Survival (PFS) Percentage of Participants With Objective Response Percentage of Participants With Clinical Benefit Duration of Response (DR) Time to Treatment Failure (TTF) Quality-adjusted Time Without Symptoms or Toxicity (Q-TWiST) European Quality of Life Health Questionnaire (EQ-5D) - Index Score | Phase 3 | 626 | Jul-03     | 25-Oct-12      |
| IFN-α | NCT00539591 | Bevacizumab in Metastatic Renal Cancer                                                                                                                                                                     | Completed  | Malignant Melanoma                                                                                                                              | Drug: Peginterferon alfa-2b Drug: Temozolomide Drug: Recombinant interferon alfa-2b                                                                                                                                                                       | Tumor Response Rate Number of Patients Who Experience Toxicity at or Above the Target Toxicity for Strata B1 and B2 Number of Patients Who Experience Toxicity at or Above the Target Toxicity for Stratum A Patients Probability of Event-free Survival (EFS)                                                                                       | Phase 2 | 29  | Oct-07     | 23-Mar-17      |
| IFN-α | NCT02627144 | Melphalan, Peripheral Stem Cell Transplantation, and Interleukin-2 Followed by Interferon Alfa in Treating Patients With Advanced                                                                          | Completed  | Renal Cell Cancer                                                                                                                               | Drug: Bevacizumab Drug: Interferon alpha-2a                                                                                                                                                                                                               | Percentage of Participants With Best Overall Tumor Response Percentage of Participants With Disease Control Progression-free Survival (PFS) Time Overall Survival (OS) Time Cumulative Dose of Immunotherapy (Interferon Alpha-2a) in Daily Routine                                                                                                  |         | 365 | Jan-08     | 29-Aug-16      |
| IFN-α | NCT00006244 | Efficacy and Safety of High-dose Interferon Alfa-2b (Intron A®) for the Adjuvant Treatment of Malignant Melanoma (Study P04083)                                                                            | Completed  | Refractory Multiple Myeloma Stage I Multiple Myeloma Stage II Multiple Myeloma Stage III Multiple Myeloma                                       | Drug: melphalan Biological: recombinant interferon alfa Biological: aldesleukin Procedure: in vitro-treated peripheral blood stem cell transplantation                                                                                                    | Overall Survival Initial Response to Therapy Time to Disease Progression Proportion of Patients Alive and in Remission Number of Patients <56 Years Old Experiencing Grade 3-4 Regimen Related Toxicity Number of Patients ≥56 Years Old Experiencing Grade 3-4 Regimen Related Toxicity                                                             | Phase 3 | 36  | Feb-00     | 12-Jul-17      |
| IFN-α | NCT00749684 | A Study of Pegylated Interferon Alfa-2b (MK-4031) as an Adjuvant Treatment in Japanese Patients With Malignant Melanoma (MK-4031-370)                                                                      | Completed  | Melanoma                                                                                                                                        | Biological: Interferon α-2b                                                                                                                                                                                                                               | Number of Participants With Disease Recurrence Relapse Free Survival Time                                                                                                                                                                                                                                                                            | Phase 4 | 138 | Dec-96     | 19-Oct-15      |
| IFN-α | NCT01636960 |                                                                                                                                                                                                            | Terminated | Malignant Melanoma                                                                                                                              | Biological: PegIFN alfa-2b                                                                                                                                                                                                                                | Number of Participants Experiencing Dose-limiting Toxicities (DLTs) - Induction Phase Safety: Number of Participants Experiencing Adverse Events (AEs) Number of Participants Discontinuing Study Drug Because of AEs                                                                                                                                | Phase 2 | 9   | 25-Dec-12  | 8-Aug-18       |



|       |             |                                                                                                                                             |            |                       |                                                                                                                                                                                                                                                                           |                                                                                                                                                                                                                                                                                                                                                                                                                                                                                                                                                                                                                                                                                                                                                                                                                                                                                                                                                                                                                                                                                                                                                                                                                                                                                                                                                                                                                                                                                                                                                                                                                                                                                                                                                                                                                                                                                                                                                                                                                                                                                                                                                                                                                                                                                                                                                                                                                                                                                                                                                                                                                                                                                                                                                                                                                                                                                                   |         |     |            |           |
|-------|-------------|---------------------------------------------------------------------------------------------------------------------------------------------|------------|-----------------------|---------------------------------------------------------------------------------------------------------------------------------------------------------------------------------------------------------------------------------------------------------------------------|---------------------------------------------------------------------------------------------------------------------------------------------------------------------------------------------------------------------------------------------------------------------------------------------------------------------------------------------------------------------------------------------------------------------------------------------------------------------------------------------------------------------------------------------------------------------------------------------------------------------------------------------------------------------------------------------------------------------------------------------------------------------------------------------------------------------------------------------------------------------------------------------------------------------------------------------------------------------------------------------------------------------------------------------------------------------------------------------------------------------------------------------------------------------------------------------------------------------------------------------------------------------------------------------------------------------------------------------------------------------------------------------------------------------------------------------------------------------------------------------------------------------------------------------------------------------------------------------------------------------------------------------------------------------------------------------------------------------------------------------------------------------------------------------------------------------------------------------------------------------------------------------------------------------------------------------------------------------------------------------------------------------------------------------------------------------------------------------------------------------------------------------------------------------------------------------------------------------------------------------------------------------------------------------------------------------------------------------------------------------------------------------------------------------------------------------------------------------------------------------------------------------------------------------------------------------------------------------------------------------------------------------------------------------------------------------------------------------------------------------------------------------------------------------------------------------------------------------------------------------------------------------------|---------|-----|------------|-----------|
| IFN-α | NCT00117637 | BAY43-9006 (Sorafenib) Versus Interferon Alpha-2a in Patients With Unresectable and/or Metastatic Renal Cell Carcinoma                      | Completed  | Carcinoma, Renal Cell | Drug: Sorafenib (Nexavar, BAY43-9006) Drug: Interferon                                                                                                                                                                                                                    | Progression-free Survival (PFS) Based on Independent Radiological Review for the First Intervention Period Progression-free Survival (PFS) Based on Investigator Assessment for the First Intervention Period Disease Control (DC) According to Independent Central Review for the First Intervention Period Disease Control (DC) According to the Investigator Assessment for the First Intervention Period Disease Control (DC) According to the Investigator Assessment for the Second Intervention Period Analysis of the Quality of Life by Use of the Respiratory Domain of the Functional Assessment of Cancer Therapy-Kidney Symptom Index (FKSI) After Intervention for the First Intervention Period Analysis of the Quality of Life by Use of the Respiratory Domain of the Functional Assessment of Cancer Therapy-Kidney Symptom Index (FKSI) for the Second Intervention Period Analysis of the Quality of Life by Use of Total Score of the Functional Assessment of Cancer Therapy-Kidney Symptom Index (FKSI) for the First Intervention Period Analysis of the Quality of Life by Use of Total Score of the Functional Assessment of Cancer Therapy-Kidney Symptom Index (FKSI) for the Second Intervention Period Analysis of the Quality of Life (QoL) by Use of Functional Assessment of Cancer Therapy-Biologic-response Modifiers (FACT-BRM) for the First Intervention Period Analysis of the Quality of Life (QoL) by Use of Functional Assessment of Cancer Therapy-Biologic-response Modifiers (FACT-BRM) for the Second Intervention Period Analysis of the Treatment Tolerability (Effectiveness) by Use of Treatment Satisfaction Questionnaire for Medication (TSQM) for the First Intervention Period Analysis of the Treatment Tolerability (Side Effects) by Use of Treatment Satisfaction Questionnaire for Medication (TSQM) for the First Intervention Period Analysis of the Treatment Tolerability (Convenience) by Use of Treatment Satisfaction Questionnaire for Medication (TSQM) for the First Intervention Period Analysis of the Treatment Tolerability (Global Satisfaction) by Use of Treatment Satisfaction Questionnaire for Medication (TSQM) for the First Intervention Period Analysis of the Treatment Tolerability (Effectiveness) by Use of Treatment Satisfaction Questionnaire for Medication (TSQM) for the Second Intervention Period Analysis of the Treatment Tolerability (Side Effects) by Use of Treatment Satisfaction Questionnaire for Medication (TSQM) for the Second Intervention Period Analysis of the Treatment Tolerability (Convenience) by Use of Treatment Satisfaction Questionnaire for Medication (TSQM) for the Second Intervention Period Analysis of the Treatment Tolerability (Global Satisfaction) by Use of Treatment Satisfaction Questionnaire for Medication (TSQM) for the Second Intervention Period | Phase 3 | 189 | Jun-05     | 31-Oct-14 |
| IFN-α | NCT00723710 | Effect of Proactive Management of Side Effects on Treatment Compliance in Malignant Melanoma Patients on High-dose Introna                  | Completed  | Melanoma              | Biological: Introna (interferon alfa-2b; SCH 30500)                                                                                                                                                                                                                       | Number of Participants Who Completed Treatment                                                                                                                                                                                                                                                                                                                                                                                                                                                                                                                                                                                                                                                                                                                                                                                                                                                                                                                                                                                                                                                                                                                                                                                                                                                                                                                                                                                                                                                                                                                                                                                                                                                                                                                                                                                                                                                                                                                                                                                                                                                                                                                                                                                                                                                                                                                                                                                                                                                                                                                                                                                                                                                                                                                                                                                                                                                    | Phase 2 | 299 | April 2006 | 26-Aug-15 |
| IFN-α | NCT00090870 | PEG-Interferon Alfa-2b, Sargramostim, and Thalidomide in Treating Patients With Metastatic                                                  | Terminated | Kidney Cancer         | Biological: PEG-interferon alfa-2b Biological: GM-CSF Drug: thalidomide                                                                                                                                                                                                   | Response Rate Duration of Response Frequency of Adverse Events Assessed by NCI CTC Version 2 Progression-free Survival                                                                                                                                                                                                                                                                                                                                                                                                                                                                                                                                                                                                                                                                                                                                                                                                                                                                                                                                                                                                                                                                                                                                                                                                                                                                                                                                                                                                                                                                                                                                                                                                                                                                                                                                                                                                                                                                                                                                                                                                                                                                                                                                                                                                                                                                                                                                                                                                                                                                                                                                                                                                                                                                                                                                                                            | Phase 2 | 10  | April 2002 | 12-Jul-18 |
| IFN-α | NCT00006237 | S0008: Chemotherapy Plus Biological Therapy in Treating Patients With Melanoma                                                              | Completed  | Melanoma (Skin)       | Biological: interleukin-2 Biological: filgrastim Biological: interferon alfa Drug: cisplatin Drug: dacarbazine Drug:                                                                                                                                                      | 5-year Overall Survival 5-year Relapse-Free Survival Toxicity                                                                                                                                                                                                                                                                                                                                                                                                                                                                                                                                                                                                                                                                                                                                                                                                                                                                                                                                                                                                                                                                                                                                                                                                                                                                                                                                                                                                                                                                                                                                                                                                                                                                                                                                                                                                                                                                                                                                                                                                                                                                                                                                                                                                                                                                                                                                                                                                                                                                                                                                                                                                                                                                                                                                                                                                                                     | Phase 2 | 432 | Aug-00     | 25-Mar-15 |
| IFN-α | NCT00262951 | Chemoradiation in Locally Advanced Pancreatic Cancer                                                                                        | Terminated | Pancreatic Cancer     | Biological: recombinant interferon alfa Drug: cisplatin Drug: fluorouracil Radiation: radiation therapy Procedure: Resection of                                                                                                                                           | Number of Patients in Whom Tumor Was Resectable Overall Survival                                                                                                                                                                                                                                                                                                                                                                                                                                                                                                                                                                                                                                                                                                                                                                                                                                                                                                                                                                                                                                                                                                                                                                                                                                                                                                                                                                                                                                                                                                                                                                                                                                                                                                                                                                                                                                                                                                                                                                                                                                                                                                                                                                                                                                                                                                                                                                                                                                                                                                                                                                                                                                                                                                                                                                                                                                  | Phase 2 | 23  | Jan-05     | 28-Dec-17 |
| IFN-α | NCT00796757 | A Study of Avastin (Bevacizumab) in Combination With Low-Dose-Interferon in Patients With Metastatic Clear Cell Renal Cell Carcinoma (RCC). | Completed  | Renal Cell Cancer     | Drug: bevacizumab [Avastin] Drug: interferon alfa-2a                                                                                                                                                                                                                      | Progression-Free Survival (PFS) - Percentage of Participants Estimated to be Progression Free at 12 and 24 Months PFS - Percentage of Participants With an Event PFS - Time to Event Percentage of Participants With a Best Overall Response of Complete Response (CR) or Partial Response (PR) Overall Survival (OS) - Percentage of Participants Estimated to be Alive at 12 and 24 Months OS - Percentage of Participants With an Event OS - Time to Event Percentage of Participants With Any Health Problems as Assessed by the European Quality of Life 5 Dimensions (EQ-5D) by Visit EQ-5D - Visual                                                                                                                                                                                                                                                                                                                                                                                                                                                                                                                                                                                                                                                                                                                                                                                                                                                                                                                                                                                                                                                                                                                                                                                                                                                                                                                                                                                                                                                                                                                                                                                                                                                                                                                                                                                                                                                                                                                                                                                                                                                                                                                                                                                                                                                                                        | Phase 2 | 146 | Dec-08     | 27-May-15 |
| IFN-α | NCT00363649 | Interferon and GM-CSF Compared With Imatinib Mesylate and Vaccine Therapy in Patients With Chronic Phase CML on a TKI                       | Completed  | Leukemia              | Biological: GM-K562 cell vaccine Biological: Interferon alfa Biological: Sargramostim                                                                                                                                                                                     | Progression-free Survival Complete Remission Rate Time to Complete Molecular Remission Disease-free Survival Early Discontinuation                                                                                                                                                                                                                                                                                                                                                                                                                                                                                                                                                                                                                                                                                                                                                                                                                                                                                                                                                                                                                                                                                                                                                                                                                                                                                                                                                                                                                                                                                                                                                                                                                                                                                                                                                                                                                                                                                                                                                                                                                                                                                                                                                                                                                                                                                                                                                                                                                                                                                                                                                                                                                                                                                                                                                                | Phase 2 | 36  | Sep-06     | 13-Nov-18 |
| IFN-α | NCT00589550 | PEG-Interferon Alfa-2b and Sorafenib in Treating Patients With Unresectable or Metastatic Kidney Cancer                                     | Terminated | Kidney Cancer         | Biological: PEG-interferon alfa-2b Drug: Sorafenib Genetic: gene expression analysis Genetic: polymerase chain reaction Genetic: reverse transcriptase-polymerase chain reaction Other: flow cytometry Other: immunoenzyme technique Other: laboratory biomarker analysis | Maximum Tolerated Dose of PEG-interferon Alfa-2b and Sorafenib Tosylate Characterize the Toxicity of Peginterferon Alfa-2b and Sorafenib in Patients With Metastatic or Unresectable Clear Cell Renal Cell Carcinoma Progression-free Survival of Patients Receiving Peginterferon Alfa-2b and Sorafenib Response Rate of Patients Receiving Peginterferon Alfa-2b and Sorafenib Overall Survival Activation of Interferon-induced Transcription Factors in Immune Cell Subsets by Flow Cytometry and Correlation of This Information With Clinical Outcome Circulating Levels of IFN-γ and IL-5 for Determination of Th1/Th2 Status and CD4+, CD25+, and FoxP3 Cell Number (T Regs) in Peripheral Blood                                                                                                                                                                                                                                                                                                                                                                                                                                                                                                                                                                                                                                                                                                                                                                                                                                                                                                                                                                                                                                                                                                                                                                                                                                                                                                                                                                                                                                                                                                                                                                                                                                                                                                                                                                                                                                                                                                                                                                                                                                                                                                                                                                                          | Phase 1 | 1   | Feb-08     | 8-Jun-15  |

|       |             |                                                                                                                                                                            |            |                                                                                                                             |                                                                                                                                                                                                                         |                                                                                                                                                                                                                                                                                                                                                                                                                                                                                                               |                 |     |                |               |
|-------|-------------|----------------------------------------------------------------------------------------------------------------------------------------------------------------------------|------------|-----------------------------------------------------------------------------------------------------------------------------|-------------------------------------------------------------------------------------------------------------------------------------------------------------------------------------------------------------------------|---------------------------------------------------------------------------------------------------------------------------------------------------------------------------------------------------------------------------------------------------------------------------------------------------------------------------------------------------------------------------------------------------------------------------------------------------------------------------------------------------------------|-----------------|-----|----------------|---------------|
| IFN-α | NCT02736721 | Expanded Access Study With Peginterferon Alfa-2a (Pegasys) in Participants With Chronic Myelogenous Leukemia (CML)                                                         | Completed  | Myelogenous Leukemia, Chronic                                                                                               | Drug: Peginterferon alfa-2a                                                                                                                                                                                             | Number of Participants With Complete Hematologic Response Time to Loss of Previous Hematologic Response Number of Participants With Major Cytogenetic Response (CyR) Time to Loss of Previous CyR Number of Participants With Molecular Response (MR) Time to Loss of Previous MR                                                                                                                                                                                                                             | Phase 1 Phase 2 | 41  | Sep-03         | 20-Sep-16     |
| IFN-α | NCT00610857 | Safety and Efficacy of Combination HDI and Anti-CTLA4 for Recurrent Inoperable Stage III or Stage IV                                                                       | Completed  | Melanoma                                                                                                                    | Drug: Anti-CTLA4 monoclonal antibody and HDI                                                                                                                                                                            | Best Objective Response Rate (BORR) Progression-free Survival (PFS) 1-year Overall Survival (OS) Median Overall Survival (Point Estimate)                                                                                                                                                                                                                                                                                                                                                                     | Phase 3         | 37  | Nov-06         | 22-Jun-17     |
| IFN-α | NCT00505635 | Biochemotherapy With Temozolomide for Metastatic Melanoma                                                                                                                  | Terminated | Melanoma                                                                                                                    | Drug: Temozolomide Drug: Velban Drug: Cisplatin Drug: Interleukin-2 Drug: Intron-A Drug: Thalidomide                                                                                                                    | Time to Progression (TTP) Number of Participants With Response                                                                                                                                                                                                                                                                                                                                                                                                                                                | Phase 3         | 5   | Mar-07         | 17-Jun-16     |
| IFN-α | NCT00678288 | A Study to Assess Sorafenib Alone and in Combination With Low-Dose Interferon Following Unsuccessful Treatment With Sunitinib in Patients With Advanced Renal Cell Cancer. | Terminated | Carcinoma, Renal Cell                                                                                                       | Drug: Sorafenib (Nexavar, BAY43-9006) Drug: Sorafenib (Nexavar, BAY43-9006) + Interferon                                                                                                                                | Progression-Free Survival Response Rate Time to Progression Duration of Response Overall Survival                                                                                                                                                                                                                                                                                                                                                                                                             | Phase 2         | 16  | April 2008     | 11-Dec-14     |
| IFN-α | NCT01609010 | A Study of MabThera/Rituxan (Rituximab) Alone and in Combination With Roferon-A in Patients With Follicular or Other CD20+ Low-Grade (Indolent) Lymphoma                   | Completed  | Lymphoma                                                                                                                    | Drug: rituximab Drug: interferon-a-2a                                                                                                                                                                                   | Treatment Failure - Percentage of Participants With an Event Treatment Failure - Time to Event Percentage of Participants Achieving Complete Response (CR), Unconfirmed CR (CRU), or Partial Response (PR) Percentage of Participants Achieving CR or CRU Duration of Response - Percentage of Participants With an Event Duration of Response Disease Progression - Percentage of Participants With an Event Time to Disease Progression Overall Survival (OS) - Percentage of Participants With an          | Phase 3         | 313 | Oct-02         | 8-Sep-14      |
| IFN-α | NCT00520403 | A Study of Avastin (Bevacizumab) in Combination With Standard Therapy in Patients With Metastatic Renal Cell Cancer.                                                       | Completed  | Renal Cell Cancer                                                                                                           | Drug: bevacizumab [Avastin] Drug: Interferon alfa-2a Drug: Vinblastine                                                                                                                                                  | Percentage of Participants With Disease Progression or Death PFS - Time to Event Percentage of Participants With Objective Response (OR) Overall Survival (OS)                                                                                                                                                                                                                                                                                                                                                | Phase 2         | 25  | Sep-07         | 13-Oct-14     |
| IFN-α | NCT02151448 | α DC1 Vaccine + Chemokine Modulatory Regimen (CKM) as Adjuvant Treatment of Peritoneal Surface Malignancies                                                                | Completed  | Malignant Neoplasm of Pancreas Metastatic to Peritoneal Surface Malignant Peritoneal Mesothelioma Peritoneal Carcinomatosis | Biological: DC vaccine Drug: Celecoxib Drug: Interferon Alfa-2b Biological: rintatolimod                                                                                                                                | Recommended Phase 2 Dose (RP2D) Adverse Events Possibly, Probably or Definitely Related to Study Treatment Time to Progression (TTP) Overall Survival (OS) Progression-free Survival (PFS) CXCL10 (Interferon Gamma-induced Protein 10) Levels CXCL11 (C-X-C Motif Chemokine 11) Levels Interleukin 10 (IL-10) Levels Interleukin 6 (IL-6) Cytokine Levels Interleukin-8 (IL-8) Cytokine Levels Stromal Derived Factor 1 Alpha (SDF-1A/CXCL-12) Chemokine Levels Tumor Necrosis Factor (TFNg) Cytokine Levels | Phase 3         | 64  | Jul-14         | 28-Jan-20     |
| IFN-α | NCT00470093 | Interferon Alfa and Interleukin-6 in Treating Patients With Recurrent Multiple Myeloma                                                                                     | Terminated | Multiple Myeloma and Plasma Cell Neoplasm                                                                                   | Biological: recombinant interferon-α Biological: recombinant interleukin-6                                                                                                                                              | Response Rate as Assessed by Number of Participants With Partial or Complete Response by Blad é Criteria Toxicity as Measured by Number of Participants Who Discontinued Treatment Due to Adverse Events Optimal Dose of Interleukin-6 Impact of                                                                                                                                                                                                                                                              | Phase 4         | 3   | Oct-07         | 16-Nov-18     |
| IFN-α | NCT00038649 | Therapy of Early Chronic Phase CML With Higher-Dose Gleevec, Alpha Interferon, and Low-Dose Ara-C                                                                          | Terminated | Myelogenous Leukemia, Chronic, Chronic Phase                                                                                | Drug: Gleevec                                                                                                                                                                                                           | Number of Participants With Molecular Response of Complete or Partial Hematologic Remission Participant Complete Hematologic Remission (CHR) Classified                                                                                                                                                                                                                                                                                                                                                       | Phase 4         | 117 | Jun-01         | 9-Oct-18      |
| IFN-α | NCT00759109 | Pegylated Alfa-2b Interferon Therapy of Patients With Hepatitis C-related Cirrhosis and High Liver Cell Proliferation (P02733/MK-4031-085)                                 | Completed  | Carcinoma, Hepatocellular                                                                                                   | Biological: Peginterferon alfa-2b Other: Observation (no treatment)                                                                                                                                                     | Number of Participants With the Development of Hepatocellular Carcinoma (HCC) Number of Participants With Development of Hepatic Decompensation Survival Time of Participants Number of Patients With a Virological Response Rate Change in the Proliferating Cell Nuclear Antigen Labeling Index (PCNA-LI)                                                                                                                                                                                                   | Phase 4         | 150 | Mar-02         | April 7, 2017 |
| IFN-α | NCT00004088 | Combination Chemo, Peripheral Stem Cell Transplant, Biological Therapy, Pamidronate and Thalidomide for Multiple Myeloma                                                   | Completed  | Multiple Myeloma and Plasma Cell Neoplasm                                                                                   | Biological: filgrastim Biological: recombinant interferon alfa Drug: busulfan Drug: cyclophosphamide Drug: melphalan Drug: pamidronate disodium Drug: thalidomide Procedure: peripheral blood stem cell transplantation | Best Response Prior to Tandem Autologous Stem Cell Transplant Response After Tandem Autologous Stem Cell Transplant Three-year Overall Survival Progression-free Survival Best Response at 6 Months Post Tandem Autologous Stem Cell Transplant Best Response After Tandem Autologous Stem Cell Transplant and Maintenance                                                                                                                                                                                    | Phase 3         | 77  | April 13, 1999 | 2-Jul-19      |
| IFN-α | NCT01404936 | Study of α-Interferon With Adriamycin, Bleomycin, Velban, and Dacarbazine (ABVD) With Hodgkin's                                                                            | Completed  | Lymphoma                                                                                                                    | Drug: Interferon-2A Drug: Adriamycin Drug: Bleomycin Drug: Velban Drug: Dacarbazine                                                                                                                                     | Participants' Response                                                                                                                                                                                                                                                                                                                                                                                                                                                                                        | Phase 3         | 35  | Jul-96         | 1-Feb-13      |
| IFN-α | NCT00679289 | Phase II Study of KW2871 Combined With High Dose Interferon-α 2b in Patients With Metastatic Melanoma                                                                      | Completed  | Metastatic Melanoma Cutaneous Melanoma                                                                                      | Drug: HDI Drug: KW2871                                                                                                                                                                                                  | Median Progression-free Survival (PFS) With 95% Confidence Intervals Number of Patients With Treatment-emergent Adverse Events (TEAEs) Number of Patients With Best Overall Tumor Response Number of Patients With Human Antichimeric Antibody (HACA) Reactivity To KW2871 Maximum KW2871 Antibody Levels in Plasma Following the First Infusion                                                                                                                                                              | Phase 4         | 36  | 28-Mar-08      | 16-Mar-18     |
| IFN-α | NCT00548847 | Immunotherapy for Acute Myeloid Leukemia (AML), Acute Lymphoblastic Leukemia (ALL), Blast Phase Chronic Myelogenous Leukemia (BP CML), and Mvelodyplastic Sndrome (MDS)    | Completed  | Leukemia                                                                                                                    | Biological: GM-CSF Biological: Interferon-α-2b                                                                                                                                                                          | Efficacy of GM-CSF and Pegylated Interferon-alpha 2b When Administered to Patients With AML, ALL, Blast Phase CML, and MDS Relapse After Allogeneic Transplantation, Defined as Progression-free Survival of > 33% at 3 Months Overall Survival at 6 Months (Evaluate Overall Responses; Perform Lab Experiments to Test Hypothesis That Exposure to Interferon-alpha and GM-CSF Up-regulates Co-stimulatory Molecule Expression on Relapsed Acute Leukemia Cells)                                            | Phase 3         | 15  | Jan-07         | 26-Oct-16     |
| IFN-α | NCT00457418 | High-Dose PEG-Intron Pharmacokinetic Study in Patients With Melanoma (Study P04831 AM2)                                                                                    | Completed  | Melanoma                                                                                                                    | Drug: PEG-Intron                                                                                                                                                                                                        | Area Under the Curve (AUC) of PEG-Intron at 12 Weeks Maximum Serum Concentration (Cmax) of PEG-Intron at 12 Weeks Average Concentration Within the Dosing Interval (Cavg) of PEG-Intron at 12 Weeks Minimum Serum Concentration (Cmin) of PEG-Intron at 12 Weeks Observed Time to Achieve Cmax (Tmax) of PEG-Intron at 12 Weeks Apparent Clearance (CL/F) of PEG-Intron at 12 Weeks Number of Participants                                                                                                    | Phase 3         | 32  | 20-Feb-07      | 7-Jun-17      |

|       |             |                                                                                                                                                |            |                                                            |                                                                                                                                                                                                                                             |                                                                                                                                                                                                                                                                                                                                                                                                                                                                                                                                                                                                                                                                                                                                                                                                                                        |                 |     |           |               |
|-------|-------------|------------------------------------------------------------------------------------------------------------------------------------------------|------------|------------------------------------------------------------|---------------------------------------------------------------------------------------------------------------------------------------------------------------------------------------------------------------------------------------------|----------------------------------------------------------------------------------------------------------------------------------------------------------------------------------------------------------------------------------------------------------------------------------------------------------------------------------------------------------------------------------------------------------------------------------------------------------------------------------------------------------------------------------------------------------------------------------------------------------------------------------------------------------------------------------------------------------------------------------------------------------------------------------------------------------------------------------------|-----------------|-----|-----------|---------------|
| IFN-α | NCT00396019 | Study of PEG-Intron for Plexiform Neurofibromas                                                                                                | Completed  | Plexiform Neurofibroma                                     | Drug: PEG-Intron                                                                                                                                                                                                                            | Number of Participants With Imaging Response in Strata 1 and 2 Clinical Response in Stratum 2 Time to Progression (TTP) in Stratum 3 Number of Participants With Imaging                                                                                                                                                                                                                                                                                                                                                                                                                                                                                                                                                                                                                                                               | Phase 3         | 86  | Dec-06    | 6-Nov-17      |
| IFN-α | NCT00580372 | UARK 89-001 Phase II Study of Intensive "TOTAL THERAPY" For Untreated or Minimally Treated Patients With Multiple Myeloma                      | Completed  | Multiple Myeloma                                           | Drug: VAD Drug: High-Dose cyclophosphamide Procedure: Hemopoietic stem cell procurement Drug: EDAP Procedure: Autologous Hemopoietic Stem Cell Transplant 1 Procedure: Autologous Hemopoietic Stem Cell                                     | Percentage of Participants That Are Relapse-free 5 Years After Initial Therapy                                                                                                                                                                                                                                                                                                                                                                                                                                                                                                                                                                                                                                                                                                                                                         | Phase 4         | 231 | Aug-02    | 20-Sep-16     |
| IFN-α | NCT00083551 | UARK 98-026 TT II: Multiple Myeloma Evaluating Anti-Angiogenesis With Thalidomide and Post-Transplant Consolidation Chemotherapy               | Completed  | Multiple Myeloma                                           | Drug: Thalidomide Drug: Ara-C Drug: BCNU Drug: Cisplatin Drug: Cyclophosphamide Drug: Dexamethasone Drug: Doxorubicin Drug: Etoposide Drug: Filgrastim Drug: Recombinant GM-CSF Drug: Interferon-alpha-2b Drug: Melphalan Drug: Vincristine | Overall Survival                                                                                                                                                                                                                                                                                                                                                                                                                                                                                                                                                                                                                                                                                                                                                                                                                       | Phase 2         | 668 | Aug-98    | 23-Nov-15     |
| IFN-α | NCT02982720 | Evaluating Combination Immunotherapy for Advanced Cholangiocarcinoma With Pembrolizumab and PEG-Intron                                         | Terminated | Advanced Cholangiocarcinoma                                | Drug: Pembrolizumab Drug: Sylatron                                                                                                                                                                                                          | Asses Objective Response Rate (ORR) of All Patients Receiving Pembrolizumab and Sylatron Combination Therapy Assess Progression Free Survival (PFS) of Patients Receiving Pembrolizumab and Sylatron Asses Overall Survival (OS) of Patients Receiving Pembrolizumab and Sylatron Assess Objective Response Rate (ORR) Assess Adverse Events, Serious Adverse Events and Serious Adverse Events Leading to Discontinuation of the Treatment (Death) of Combined Pembrolizumab and Sylatron Therapy.                                                                                                                                                                                                                                                                                                                                    | Phase 3         | 4   | 5-Jul-17  | 5-Jun-19      |
| IFN-α | NCT01957709 | Recombinant Interferon Gamma in Treating Patients With Soft Tissue Sarcoma                                                                     | Terminated | Myxoid Liposarcoma Round Cell Liposarcoma Synovial Sarcoma | Drug: MP-424 Drug: RBV(24 weeks) Drug: IFN beta(24 weeks) Drug: RBV(48 weeks) Drug: IFN beta(48 weeks)                                                                                                                                      | Change in Class I Major Histocompatibility Complex (MHC) Expression After Treatment With IFN Gamma MHC Class II Expression Changes in Immune Response                                                                                                                                                                                                                                                                                                                                                                                                                                                                                                                                                                                                                                                                                  | Phase 4         | 8   | 25-Sep-13 | 10-Jul-19     |
| IFN-α | NCT00415857 | Proteinase 3 PR1 Peptide Mixed With Montanide ISA-51 VG Adjuvant and Administered With GM-CSF and PEG-INTRON(R)                                | Terminated | Leukemia                                                   | Biological: Peptide Vaccine (PR1 Peptide) Drug: Peginterferon alfa-2b Drug: Imatinib Drug: GM-CSF                                                                                                                                           | Molecular Response Rate Number of Participants With Immunologic Response                                                                                                                                                                                                                                                                                                                                                                                                                                                                                                                                                                                                                                                                                                                                                               | Phase 2         | 5   | Dec-06    | 21-Aug-18     |
| IFN-α | NCT01687244 | Intravesical Administration of rAd-IFN/Syn3 in Patients With BCG-Refractory or Relapsed Bladder Cancer                                         | Completed  | Superficial Bladder Cancer                                 | Drug: INSTILADRIN                                                                                                                                                                                                                           | Incidence of High Grade-Recurrence Free Survival at 360 Days Safety of rAd-IFN/Syn3 Incidence of High Grade Recurrence-Free Survival at 3 Months (90 Days) Incidence of High Grade-Recurrence-Free Survival at 6 Months (180 Days) Incidence of High Grade-Recurrence-Free Survival at 9 Months (270 Days) Incidence of Cystectomy in All Patients Overall Survival in All Patients Number of Patients With Elevated Levels of Viral Vector in Blood Number of Patients With Elevated Levels of Viral Vector in Urine Number of Patients With Elevated IFN alpha2b Protein Levels in Serum Number of Patients With Elevated IFN alpha2b Protein Levels in Urine Number of Patients With Elevated Levels of Anti-IFN alpha2b Antibodies in Serum Number of Patients With Elevated Levels of Anti-Adenovirus Type 5 Antibodies in Serum. | Phase 2         | 40  | Sep-12    | 24-Jul-17     |
| IFN-α | NCT01943422 | Safety and Efficacy Study of Vemurafenib and High-dose Interferon Alfa-2b in Melanoma                                                          | Completed  | Melanoma                                                   | Drug: High-dose Interferon alfa-2b Drug: Vemurafenib                                                                                                                                                                                        | Number of Participants with Adverse Events to determine Ph II dose Progression Free and overall survival (Efficacy)                                                                                                                                                                                                                                                                                                                                                                                                                                                                                                                                                                                                                                                                                                                    | Phase 1         | 7   | Oct-13    | April 3, 2018 |
| IFN-α | NCT00445523 | Safety Study of TroVax Alone vs. TroVax Plus Interferon Alpha in Patients With Renal Cancer                                                    | Completed  | Carcinoma, Renal Cell                                      | Biological: TroVax ® (Immunological Vaccine Therapy) Drug: Interferon-alpha                                                                                                                                                                 | Tumor objective response rate by RECIST criteria to TroVax ® and TroVax ® in combination with IFN-α. Overall survival Progression-free survival Time to Progression                                                                                                                                                                                                                                                                                                                                                                                                                                                                                                                                                                                                                                                                    | Phase 2         | 28  | May-06    | 17-Mar-16     |
| IFN-α | NCT00504140 | Recombinant Interferon Alpha and Etoposide in Relapsed                                                                                         | Completed  | Osteosarcoma                                               | Drug: Etoposide Drug: Interferon Alpha                                                                                                                                                                                                      | Number of Patients with Response when combining IFN with etoposide for the treatment of relapsed osteosarcoma.                                                                                                                                                                                                                                                                                                                                                                                                                                                                                                                                                                                                                                                                                                                         | Phase 2         | 30  | Nov-96    | 2-Aug-12      |
| IFN-α | NCT00005615 | Post-Operative Adjuvant Radiotherapy With Concurrent                                                                                           | Completed  | Melanoma (Skin)                                            | Biological: Interferon alfa Radiation: Radiation therapy                                                                                                                                                                                    | Overall Response Rate (ORR) Number of Participants with Adverse Events                                                                                                                                                                                                                                                                                                                                                                                                                                                                                                                                                                                                                                                                                                                                                                 | Phase 1 Phase   | 24  | Jul-97    | 25-Sep-12     |
| IFN-α | NCT00420888 | ABR-217620/Naptumomab Estafenatox With Interferon-alpha (IFN-alpha) Compared to IFN-alpha Alone in Patients With Advanced Renal Cell Carcinoma | Completed  | Renal Cell Carcinoma                                       | Drug: ABR-217620/naptumomab estafenatox Drug: IFN-alpha                                                                                                                                                                                     | Time to death Progression-free survival time Objective tumor response rate Best overall response Duration of response Changes in sum of target lesions Immunological response in patients on combined treatment of ABR-217620/naptumomab estafenatox and IFN-alpha Vital signs Physical measurements Adverse events Laboratory safety assessments Pharmacokinetic parameters of ABR-217620/naptumomab estafenatox                                                                                                                                                                                                                                                                                                                                                                                                                      | Phase 2 Phase 3 | 526 | Jan-07    | 22-Jul-15     |
| IFN-α | NCT02331706 | IFN-DLI for Relapsed Acute Leukemia After Allo-SCT                                                                                             | Completed  | Leukemia                                                   | Drug: Interferon alpha-2B (IFN-α) 3 million units (MU) subcutaneous daily                                                                                                                                                                   | Number of Adverse Events overall survival disease-free survival                                                                                                                                                                                                                                                                                                                                                                                                                                                                                                                                                                                                                                                                                                                                                                        | Early Phase 1   | 16  | Dec-14    | 22-Aug-18     |
| IFN-α | NCT00082719 | Short-Term Low-Dose Interferon Alfa in Treating Patients With Cancer of the Urothelium                                                         | Completed  | Bladder Cancer Urethral Cancer                             | Biological: Recombinant Interferon Alfa                                                                                                                                                                                                     | Descriptive Data on Expression of Death Effectors in Context of Low-dose Interferon                                                                                                                                                                                                                                                                                                                                                                                                                                                                                                                                                                                                                                                                                                                                                    | Phase 1         | 33  | Dec-03    | 14-May-15     |

|       |             |                                                                                                                                                                                                                    |           |                                                                                                                                  |                                                                                                                                                                |                                                                                                                                                                                                                                                                                                                                                                                                                                                                                                                                                                                                                                            |         |     |            |           |
|-------|-------------|--------------------------------------------------------------------------------------------------------------------------------------------------------------------------------------------------------------------|-----------|----------------------------------------------------------------------------------------------------------------------------------|----------------------------------------------------------------------------------------------------------------------------------------------------------------|--------------------------------------------------------------------------------------------------------------------------------------------------------------------------------------------------------------------------------------------------------------------------------------------------------------------------------------------------------------------------------------------------------------------------------------------------------------------------------------------------------------------------------------------------------------------------------------------------------------------------------------------|---------|-----|------------|-----------|
| IFN-α | NCT01220648 | Determining the Maximum Tolerated Dose of Low Dose Interferon-alpha in Conjunction With Nilotinib in Pretreated Philadelphia Chromosome Positive (Ph+) Chronic Myeloid Leukemia Patients in Chronic Phase (CML-CP) | Completed | Chronic Myeloid Leukemia                                                                                                         | Drug: Nilotinib, interferon-alfa                                                                                                                               | Number of Clinically significant adverse events or abnormal laboratory values (dose-limiting toxicities) unrelated to disease progression, intercurrent illness, or concomitant medications on the combination treatment Rate of major cytogenetic response (MCyR) at 6 and 12 months Rate of complete cytogenetic response (CCyR) at 6 and 12 months Rate of major molecular response (MMR) at 12 months Safety profile of nilotinib in combination with interferon alfa, i.e. the number of dose limiting toxicities (DLT) for each interferon alfa dose level Progression-free survival (PFS) Event-free survival Overall survival (OS) | Phase 1 | 4   | April 2012 | 5-May-15  |
| IFN-α | NCT00002621 | Interferon Alfa in Treating Children With HIV-Related Cancer                                                                                                                                                       | Completed | Leukemia Lymphoma Unspecified Childhood Solid Tumor, Protocol Specific                                                           | Biological: recombinant interferon alfa                                                                                                                        | Complete response rate for HIV related malignancies treated with interferon Event Free Survival                                                                                                                                                                                                                                                                                                                                                                                                                                                                                                                                            | Phase 2 | 8   | Dec-94     | 24-Jul-14 |
| IFN-α | NCT00002849 | S9628 Dexamethasone Plus Interferon Alfa in Treating Patients With Primary Systemic Amyloidosis                                                                                                                    | Completed | Multiple Myeloma                                                                                                                 | Biological: recombinant interferon alfa Drug: dexamethasone                                                                                                    | response                                                                                                                                                                                                                                                                                                                                                                                                                                                                                                                                                                                                                                   | Phase 2 | 93  | Nov-96     | 6-Mar-15  |
| IFN-α | NCT00055809 | Bevacizumab and PEG-Interferon Alfa-2b in Treating Patients With Metastatic or Unresectable Carcinoid                                                                                                              | Completed | Metastatic Gastrointestinal Carcinoid Tumor Recurrent Gastrointestinal Carcinoid Tumor Regional Gastrointestinal Carcinoid Tumor | Biological: PEG-interferon alfa-2b Biological: bevacizumab Other: laboratory biomarker analysis                                                                | Tumor response rate (CR + PR) as measured by RECIST criteria Progression free survival Biochemical response rate measured after treatment Toxicity graded according to CTC v3.0 criteria for adverse outcomes                                                                                                                                                                                                                                                                                                                                                                                                                              | Phase 2 | 44  | Jan-03     | 23-Jan-13 |
| IFN-α | NCT01608594 | Neoadjuvant Combination Therapy With Ipilimumab and High-Dose IFN-α 2b for Melanoma                                                                                                                                | Completed | Melanoma                                                                                                                         | Drug: administration of ipilimumab 10mg/kg Drug: administration of ipilimumab 3mg/kg + HDI                                                                     | Adverse Events Pathologic response rate Radiologic preoperative response rate Progression Free Survival Overall Survival                                                                                                                                                                                                                                                                                                                                                                                                                                                                                                                   | Phase 1 | 30  | 21-May-13  | 28-Aug-18 |
| IFN-α | NCT00278174 | Interferon Alfa (IFN-Alpha-1b) in Renal Cancer With Metastatic Kidney                                                                                                                                              | Completed | Kidney Cancer                                                                                                                    | Biological: recombinant interferon alpha-1b                                                                                                                    | Safety Efficacy                                                                                                                                                                                                                                                                                                                                                                                                                                                                                                                                                                                                                            | Phase 2 | 7   | Feb-05     | 4-May-11  |
| IFN-α | NCT00059813 | Oblimersen and Interferon Alfa in Treating Patients With Metastatic Renal Cell Cancer                                                                                                                              | Completed | Recurrent Renal Cell Cancer Stage IV Renal Cell Cancer                                                                           | Biological: recombinant interferon alfa Biological: oblimersen sodium Other: pharmacological study                                                             | Objective response rate based on the Response Evaluation Criteria In Solid Tumors (RECIST) Overall survival Progression free survival Time to progression                                                                                                                                                                                                                                                                                                                                                                                                                                                                                  | Phase 2 | 41  | Aug-03     | 26-Aug-13 |
| IFN-α | NCT01060501 | Modulation of Adjuvant 5-FU by Folinic Acid and Interferon-alpha in                                                                                                                                                | Completed | Rectal Cancer                                                                                                                    | Drug: Folinic Acid, interferon-alpha                                                                                                                           | overall survival recurrence-free survival Toxicity (WHO)                                                                                                                                                                                                                                                                                                                                                                                                                                                                                                                                                                                   | Phase 3 | 796 | Jul-92     | 2-Feb-10  |
| IFN-α | NCT00101114 | Sorafenib and Interferon Alfa in Treating Patients With Metastatic or Unresectable Kidney Cancer                                                                                                                   | Completed | Clear Cell Renal Cell Carcinoma Recurrent Renal Cell Cancer Stage III Renal Cell Cancer Stage IV Renal Cell Cancer               | Drug: sorafenib tosylate Biological: recombinant interferon alfa-2b Other: laboratory biomarker analysis                                                       | Response probability Time to treatment failure Survival                                                                                                                                                                                                                                                                                                                                                                                                                                                                                                                                                                                    | Phase 2 | 55  | Sep-04     | 28-Feb-13 |
| IFN-α | NCT00149565 | Phase III Randomized Trial in Postoperative Hepatocellular                                                                                                                                                         | Completed | Hepatocellular Carcinoma                                                                                                         | Drug: IFN-α2b                                                                                                                                                  | 134 patients for each of the two treatment arms are needed.                                                                                                                                                                                                                                                                                                                                                                                                                                                                                                                                                                                | Phase 3 | 268 | Oct-97     | 16-Dec-05 |
| IFN-α | NCT02074605 | Cognitive Effects of Interferon in Patients With Melanoma                                                                                                                                                          | Completed | Melanoma                                                                                                                         | Biological: Interferon alpha                                                                                                                                   | Change in cognitive function                                                                                                                                                                                                                                                                                                                                                                                                                                                                                                                                                                                                               |         | 36  | Jul-08     | 28-Feb-14 |
| IFN-α | NCT00001509 | A Phase II Trial of All-Trans-Retinoic Acid in Combination With Interferon-Alpha 2a in Children With Recurrent Neuroblastoma or Wilms' Tumor                                                                       | Completed | Nephroblastoma Neuroblastoma                                                                                                     | Drug: IFN-alpha with retinoic acid                                                                                                                             |                                                                                                                                                                                                                                                                                                                                                                                                                                                                                                                                                                                                                                            | Phase 2 | 60  | Jul-96     | 4-Mar-08  |
| IFN-α | NCT00204529 | Pegylated Interferon-alpha-2a in Patients With Malignant Melanoma                                                                                                                                                  | Completed | Melanoma                                                                                                                         | Drug: pegylated interferon-alpha-2a Drug: interferon-alpha-2a                                                                                                  | Time to distant metastasis Disease free survival Overall survival Quality of life Number and Grade of Adverse Events                                                                                                                                                                                                                                                                                                                                                                                                                                                                                                                       | Phase 3 | 901 | Oct-04     | 3-May-17  |
| IFN-α | NCT00002574 | Homoharringtonine and Interferon Alfa in Treating Patients With Chronic Myelogenous Leukemia                                                                                                                       | Completed | Leukemia                                                                                                                         | Biological: recombinant interferon alfa Drug: omacetaxine mepesuccinate                                                                                        |                                                                                                                                                                                                                                                                                                                                                                                                                                                                                                                                                                                                                                            | Phase 2 | 87  | Sep-94     | 5-Feb-13  |
| IFN-α | NCT01259934 | Nordic Adjuvant IFN Melanoma Trial                                                                                                                                                                                 | Completed | Melanoma Adjuvant Therapy                                                                                                        | Drug: Interferon-alpha2b - 1 year Drug: Interferon-alpha2b - 2 years                                                                                           | Overall survival Relapse free survival Safety-toxicity Health related quality of life                                                                                                                                                                                                                                                                                                                                                                                                                                                                                                                                                      | Phase 3 | 855 | Nov-96     | 14-Dec-10 |
| IFN-α | NCT00002882 | Interferon Alfa With or Without Combination Chemotherapy Plus Interleukin-2 in Treating Patients With Melanoma                                                                                                     | Completed | Melanoma Skin Cancer                                                                                                             | Biological: Aldesleukin (IL-2) Biological: Recombinant Interferon Alfa (IFN-A) Drug: Cisplatin Drug: Dacarbazine Drug: Vinblastine Procedure: Adjuvant Therapy | Effectiveness of Interferon Alfa with/without Combination Chemotherapy + Interleukin-2 for Melanoma                                                                                                                                                                                                                                                                                                                                                                                                                                                                                                                                        | Phase 3 | 140 | Nov-95     | 13-Dec-11 |
| IFN-α | NCT00217542 | Azacitidine and Recombinant Interferon Alfa-2b in Treating Patients With Stage III or Stage IV Melanoma or Stage IV Kidney Cancer That Cannot Be Removed By Surgery                                                | Completed | Recurrent Melanoma Recurrent Renal Cell Cancer Stage III Melanoma Stage IV Melanoma Stage IV Renal Cell Cancer                   | Biological: recombinant interferon alfa-2b Drug: amifostine/azacitidine                                                                                        | Adverse event profile of azacitidine and recombinant interferon alfa-2b in patients with unresectable or metastatic melanoma and renal cell carcinoma Maximum tolerated dose of recombinant interferon alfa-2b when administered in combination with 5-azacitidine Correlation of promoter methylation with the level of expression of the genes Response rate of giving recombinant interferon alfa-2b when administered in combination with 5-azacitidine in patients with metastatic melanoma and renal cel                                                                                                                             | Phase 1 | 42  | Jul-05     | 3-May-13  |
| IFN-α | NCT00002965 | Interferon Alfa in Treating Patients With Recurrent Unresectable Meningiomas and Malignant                                                                                                                         | Completed | Brain and Central Nervous System Tumors                                                                                          | Biological: Recombinant Interferon Alfa (INF alpha)                                                                                                            | Number of Patients with Dose Limiting Toxicity (DLT)                                                                                                                                                                                                                                                                                                                                                                                                                                                                                                                                                                                       | Phase 2 | 16  | Jan-97     | 30-Jul-12 |
| IFN-α | NCT00591188 | Capecitabine and Interferon-Alpha in Metastatic Renal Cell Carcinoma Patients With Failure on Interleukin-2 Based Regimens                                                                                         | Completed | Carcinoma, Renal Cell                                                                                                            | Drug: capecitabine, interferon-alpha                                                                                                                           | Evaluate progression-free survival with capecitabine and interferon treatment in metastatic renal cell carcinoma (MRCC) patients (pts) with IL-2 failure in first-line Evaluate the safety and tolerability of the capecitabine and interferon combination Evaluate response rate and overall survival with the capecitabine and interferon combination in MRCC pts with                                                                                                                                                                                                                                                                   | Phase 2 | 49  | Dec-06     | 1-May-09  |
| IFN-α | NCT03069248 | Treatment of Follicular Lymphoma With High Dose Therapy and Stem Cell Support Followed by Rituximab and Alpha Interferon                                                                                           | Completed | Follicular Lymphoma                                                                                                              | Drug: Rituximab Drug: Alpha Interferon                                                                                                                         | Survival (Overall survival) Survival (Progression free survival) Toxicities (Possible transplant-related adverse events) Minimal Residual Disease                                                                                                                                                                                                                                                                                                                                                                                                                                                                                          | Phase 2 | 36  | 1-Jun-00   | 3-Mar-17  |

|       |             |                                                                                                                                                                                                                  |           |                                                                                                                                                                     |                                                                                                                     |                                                                                                                                                                                                                                                                                                                                                                                                                                                                                                                                                    |                 |      |           |           |
|-------|-------------|------------------------------------------------------------------------------------------------------------------------------------------------------------------------------------------------------------------|-----------|---------------------------------------------------------------------------------------------------------------------------------------------------------------------|---------------------------------------------------------------------------------------------------------------------|----------------------------------------------------------------------------------------------------------------------------------------------------------------------------------------------------------------------------------------------------------------------------------------------------------------------------------------------------------------------------------------------------------------------------------------------------------------------------------------------------------------------------------------------------|-----------------|------|-----------|-----------|
| IFN-α | NCT00330707 | Combined Use of BCG and Interferon Alpha in Bladder Cancer                                                                                                                                                       | Completed | Carcinoma of Urinary Bladder, Superficial                                                                                                                           | Drug: Bacillus Calmette Guerin and interferon alpha                                                                 | local toxicity systemic toxicity recurrence rate progression rate disease-specific mortality                                                                                                                                                                                                                                                                                                                                                                                                                                                       | Phase 2 Phase   | 140  | Oct-95    | 4-Mar-11  |
| IFN-α | NCT00629200 | Sodium Stibogluconate With Interferon Alpha-2b for Patients With Advanced Malignancies                                                                                                                           | Completed | Advanced Cancer Solid Tumors                                                                                                                                        | Drug: Sodium Stibogluconate Drug: Interferon Alpha-2b                                                               | Maximum tolerated dose (MTD) of SSG in combination with IFN alpha2b                                                                                                                                                                                                                                                                                                                                                                                                                                                                                | Phase 1         | 33   | 13-Sep-06 | 15-Nov-18 |
| IFN-α | NCT00502034 | Low-dose IL-2 Plus IFN-alpha Immunotherapy as Adjuvant Treatment of Renal Carcinoma.                                                                                                                             | Completed | Carcinoma, Renal Cell                                                                                                                                               | Drug: Interferon Alfa-2a Drug: Interleukin-2                                                                        | Recurrence-free survival: loco-regional, adrenal, kidney and distant-metastases were the events considered for event-free survival. Tolerability, toxicity and safety.                                                                                                                                                                                                                                                                                                                                                                             | Phase 3         | 310  | Jul-94    | 10-Jul-13 |
| IFN-α | NCT00908869 | Combination of Continuous Low Doses of Vinorelbine, Cyclophosphamide and Interferon Alpha 2b (" Metronomic Chemotherapy ") for Antiangiogenic and Antivascular Effect. Trial With Pharmacodynamic Study in Adult | Completed | Advanced Neoplasm                                                                                                                                                   | Drug: Vinorelbine, Cyclophosphamide and Interferon alpha 2b                                                         | Estimation of the toxicity of the combination of continuous low doses of Vinorelbine, Cyclophosphamide and Interferon alpha 2b. Estimation of the antiangiogenic and/or antivascular effect (VEGF measurement) in radiography (DEC-MRI), biology and immunohistochemistry of the treatment.                                                                                                                                                                                                                                                        | Phase 1         | 30   | May-06    | 30-Jan-12 |
| IFN-α | NCT00003542 | Interferon Alfa in Treating Patients With Advanced Kidney Cancer                                                                                                                                                 | Completed | Kidney Cancer                                                                                                                                                       | Biological: pegylated interferon alfa                                                                               |                                                                                                                                                                                                                                                                                                                                                                                                                                                                                                                                                    | Phase 1 Phase   | 58   | May-98    | 25-Jun-13 |
| IFN-α | NCT00026143 | Interleukin-12 and Interferon Alfa in Treating Patients With Metastatic Malignant Melanoma                                                                                                                       | Completed | Recurrent Melanoma Stage IV Melanoma                                                                                                                                | Biological: recombinant interleukin-12 Biological: recombinant interferon alfa Other: laboratory biomarker analysis | Response rate PFS                                                                                                                                                                                                                                                                                                                                                                                                                                                                                                                                  | Phase 2         | 60   | Oct-01    | 5-Jun-13  |
| IFN-α | NCT00006039 | Interferon Alfa-2b in Treating Patients With Advanced Low-Grade Non-Hodgkin's Lymphoma                                                                                                                           | Completed | Lymphoma Small Intestine Cancer                                                                                                                                     | Biological: pegylated interferon alfa                                                                               |                                                                                                                                                                                                                                                                                                                                                                                                                                                                                                                                                    | Phase 2         |      | Dec-99    | 19-Jun-13 |
| IFN-α | NCT00303290 | PEG Interferon Alpha 2B and Low-Dose Ara-C in Early Chronic Phase                                                                                                                                                | Completed | Chronic Myeloid Leukemia                                                                                                                                            | Drug: Peg Interferon Alpha 2b (Peg Intron) Drug: Ara-C (cytosine arabinoside)                                       | Complete Cytogenetic Response Rate after One Year on Therapy                                                                                                                                                                                                                                                                                                                                                                                                                                                                                       | Phase 1         | 76   | Jan-00    | 26-Nov-15 |
| IFN-α | NCT00002892 | Interferon Alfa or No Further Therapy Following Surgery in Treating Patients With Stage II, Stage III, or Recurrent Melanoma                                                                                     | Completed | Melanoma (Skin)                                                                                                                                                     | Biological: recombinant interferon alfa                                                                             |                                                                                                                                                                                                                                                                                                                                                                                                                                                                                                                                                    | Phase 3         | 1000 | Oct-95    | 19-Dec-13 |
| IFN-α | NCT00003451 | Interleukin-12 Followed by Interferon Alfa in Treating Patients With Advanced Cancer                                                                                                                             | Completed | Chronic Myeloproliferative Disorders Leukemia Lymphoma Multiple Myeloma and Plasma Cell Neoplasm Myelodysplastic Syndromes Precancerous Condition Unspecified Adult | Biological: recombinant interferon alfa Biological: recombinant interleukin-12                                      |                                                                                                                                                                                                                                                                                                                                                                                                                                                                                                                                                    | Phase 1         | 40   | Aug-98    | 1-Feb-13  |
| IFN-α | NCT00234182 | Postoperative Adjuvant Therapy With Recombinant Interferon-Alpha Following Curative Resection of HCC                                                                                                             | Completed | Hepatocellular Carcinoma                                                                                                                                            | Drug: Interferon alpha-2b                                                                                           | Occurrence of recurrent disease Death of the patient                                                                                                                                                                                                                                                                                                                                                                                                                                                                                               | Phase 1 Phase 2 | 84   | Jan-00    | 1-Dec-05  |
| IFN-α | NCT00072046 | Interferon Alfa-2b With or Without Bevacizumab in Treating Patients With Advanced Renal Cell Carcinoma (Kidney Cancer)                                                                                           | Completed | Kidney Cancer                                                                                                                                                       | Biological: bevacizumab Biological: recombinant interferon alfa                                                     | Overall Survival Time to progression Toxicity                                                                                                                                                                                                                                                                                                                                                                                                                                                                                                      | Phase 3         | 732  | Oct-03    | 6-Jul-16  |
| IFN-α | NCT00003656 | Tretinoin Plus Interferon Alfa in Treating Patients With Metastatic Kidney Cancer                                                                                                                                | Completed | Kidney Cancer                                                                                                                                                       | Biological: recombinant interferon alfa Drug: tretinoin liposome                                                    | Response as measured by CT, bone scans, and clinical progression at 8 weeks after first dose Toxicity by clinical evaluation from first dose to 30 days after last dose Retinoic acid receptor expression on tissue as measured by the presence of peripheral blood lymphocytes during the first and fifth dose Duration of response (progression-free survival) as measured by CT, bone scans, and clinical progression from initiation of therapy until an increase of ≥ 25% from the smallest sum of all tumor measurements obtained during the | Phase 2         | 26   | Jan-99    | 8-Nov-17  |
| IFN-α | NCT00006006 | Thalidomide Plus Interferon Alfa in Treating Patients With Progressive Liver Cancer That Cannot be                                                                                                               | Completed | Liver Cancer                                                                                                                                                        | Biological: recombinant interferon alfa Drug: thalidomide                                                           |                                                                                                                                                                                                                                                                                                                                                                                                                                                                                                                                                    | Phase 2         | 38   | Aug-00    | 11-Feb-13 |
| IFN-α | NCT00038376 | Phase II Study Of Roferon and Accutane For Patients With T-Cell                                                                                                                                                  | Completed | Lymphoma, T-Cell Mycosis Fungoides Hematologic Neoplasms                                                                                                            | Drug: Isotretinoin (Accutane) Drug: Interferon Alpha                                                                | To determine if the drug combination of alpha-interferon and isotretinoin is effective in controlling T-cell malignancies.                                                                                                                                                                                                                                                                                                                                                                                                                         | Phase 2         | 56   | 8-May-90  | 29-Oct-18 |
| IFN-α | NCT02328755 | Peginterferon Alfa-2a to Enhance Anti-leukemic Responses After Allogeneic Transplantation in Acute Myeloid Leukemia                                                                                              | Completed | Acute Myeloid Leukemia                                                                                                                                              | Drug: peg-IFN-α Procedure: Hematopoietic Cell Transplant (HCT) Drug: Calcineurin Inhibitor Drug: Methotrexate       | Maximum Tolerated Dose (MTD) of peg-IFN-α Number of Patients that Relapse Overall Survival Time Event Free Survival Time                                                                                                                                                                                                                                                                                                                                                                                                                           | Phase 1 Phase 2 | 37   | Jan-15    | 2-Oct-19  |
| IFN-α | NCT01639885 | Chemo-immunotherapy (Gemcitabine, Interferon-alpha 2b and p53 SLP) in Patients With Platinum-resistant Ovarian Cancer                                                                                            | Completed | Recurrent Ovarian Cancer                                                                                                                                            | Drug: Interferon Alfa-2b Biological: p53 SLP                                                                        | Feasibility (change in grade III and IV toxicity) and change in immunogenicity of the triple combination of gemcitabine, Peg-Intron and p53 SLP vaccination Clinical outcome (response (RECIST 1.1)) The effect of this new treatment combination on the immune system progression free survival overall survival                                                                                                                                                                                                                                  | Phase 1 Phase 2 | 15   | Aug-11    | 7-Jan-14  |
| IFN-α | NCT01725204 | Safety and Efficacy of Pegylated IFN-alpha 2B Added to Dasatinib in Newly Diagnosed Chronic Phase Myeloid Leukemia                                                                                               | Completed | Leukemia, Myeloid, Chronic-Phase                                                                                                                                    | Drug: Dasatinib + PegIFN                                                                                            | major molecular response rates overall survival quality of life Rate of CCgR Rate of MR4.0 and MR4.5                                                                                                                                                                                                                                                                                                                                                                                                                                               | Phase 2         | 40   | Sep-12    | 25-Sep-17 |

|       |              |                                                                                                                                                                           |           |                                                                                                                                                                                                        |                                                                                                                                                                                                                                                     |                                                                                                                                                                                                                                                                                                                                                                                                                                                                                                                                                                   |         |     |        |                |
|-------|--------------|---------------------------------------------------------------------------------------------------------------------------------------------------------------------------|-----------|--------------------------------------------------------------------------------------------------------------------------------------------------------------------------------------------------------|-----------------------------------------------------------------------------------------------------------------------------------------------------------------------------------------------------------------------------------------------------|-------------------------------------------------------------------------------------------------------------------------------------------------------------------------------------------------------------------------------------------------------------------------------------------------------------------------------------------------------------------------------------------------------------------------------------------------------------------------------------------------------------------------------------------------------------------|---------|-----|--------|----------------|
| IFN-α | NCT00498979  | Sodium Stibogluconate and IFN-2b Followed By CDDP, VLB and DTIC Treating Pts. With Advanced Melanoma or Other Cancers                                                     | Completed | Stage IV Melanoma                                                                                                                                                                                      | Biological: recombinant interferon alfa-2b Drug: cisplatin Drug: sodium stibogluconate Drug: dacarbazine Drug: vinblastine                                                                                                                          | Safety of the combination of sodium stibogluconate and interferon alfa-2b with chemotherapy Effects of sodium stibogluconate on interferon alfa-2b induced gene modulation and signal transduction pathways by measuring the serum soluble gene product Effectiveness of sodium stibogluconate in inhibiting the protein tyrosine phosphatases SHP-1 and SHP-2 assayed from peripheral blood leukocytes Pharmacokinetics of sodium stibogluconate in serum at escalating doses Clinical response to the combination of sodium stibogluconate and interferon alfa- | Phase 1 | 22  | May-07 | 30-Sep-15      |
| IFN-α | NCT00276536  | Interferon Alfa in Treating Patients With Stage IV Solid Tumors, Lymphoma, or Myeloma                                                                                     | Completed | Breast Cancer Lymphoma Melanoma Multiple Myeloma Sarcoma Unspecified Adult Solid Tumor, Cancer Kidney                                                                                                  | Biological: recombinant interferon alpha-1b Drug: IFN                                                                                                                                                                                               | Tolerance and safety as measured by any ≥ Grade IV granulocyte toxicity or any Grade III toxicity thought to be drug related at 1 week after each course                                                                                                                                                                                                                                                                                                                                                                                                          | Phase 1 | 35  | Jan-01 | 14-Oct-15      |
| IFN-α | NCT00001114  | The Safety and Effectiveness of Interferon Alfa-2B Plus Didanosine in Patients With Kaposi's Sarcoma                                                                      | Completed | Sarcoma, Kaposi HIV Infections                                                                                                                                                                         | Drug: Interferon alfa-2b Drug: Didanosine                                                                                                                                                                                                           |                                                                                                                                                                                                                                                                                                                                                                                                                                                                                                                                                                   | Phase 2 | 90  |        | 29-Mar-12      |
| IFN-α | NCT00000687  | Phase II Study of Zidovudine and Recombinant Alpha-2A Interferon in the Treatment of Patients With AIDS-Associated Kaposi's Sarcoma                                       | Completed | Sarcoma, Kaposi HIV Infections                                                                                                                                                                         | Drug: Interferon alfa-2a Drug: Zidovudine                                                                                                                                                                                                           |                                                                                                                                                                                                                                                                                                                                                                                                                                                                                                                                                                   | Phase 2 | 60  |        | 16-Mar-12      |
| IFN-α | NCT00217373  | Vaccine Therapy, GM-CSF, and Interferon Alfa-2b in Treating Patients With Locally Advanced or Metastatic Cancer That Expresses Carcinoembryonic Antigen (CEA)             | Completed | Adult Solid Neoplasm                                                                                                                                                                                   | Biological: Recombinant Fowlpox-CEA(6D)/TRICOM Vaccine Biological: Recombinant Interferon Alfa-2b Biological: Recombinant Vaccinia-CEA(6D)-TRICOM Vaccine Biological: Sargramostim                                                                  | MTD of IFN-alpha-2b, defined as the dose level one level beneath that dose at which 2 or more of 6 patients showed DLT, graded according to NCI CTCAE version 4.0 Incidence of adverse events, graded according to NCI CTCAE version 4.0 Response to treatment, evaluated using the new international criteria proposed by the RECIST Committee                                                                                                                                                                                                                   | Phase 1 | 33  | Jun-05 | April 20, 2015 |
| IFN-α | NCT00002657  | SWOG-9239 Reduction of Immunosuppression Plus Interferon Alfa and Combination Chemotherapy in Treating Patients With Malignant Tumors That Develop After Organ Transplant | Completed | Lymphoma Multiple Myeloma and Plasma Cell Neoplasm                                                                                                                                                     | Biological: bleomycin sulfate Biological: recombinant interferon alfa Drug: cyclophosphamide Drug: cytarabine Drug: doxorubicin hydrochloride Drug: etoposide Drug: methotrexate Drug: prednisone Drug: vincristine sulfate Procedure: conventional | Response overall survival                                                                                                                                                                                                                                                                                                                                                                                                                                                                                                                                         | Phase 2 | 20  | May-95 | 24-Jan-13      |
| IFN-α | NCT00003444  | Interferon Alfa-2b With or Without Radiation Therapy in Treating Patients With Melanoma That Has Metastasized to Lymph Nodes in the Neck, Under the Arm, or in the Groin  | Completed | Melanoma (Skin)                                                                                                                                                                                        | Biological: recombinant interferon alfa Radiation: radiation therapy                                                                                                                                                                                |                                                                                                                                                                                                                                                                                                                                                                                                                                                                                                                                                                   | Phase 3 | 167 | Oct-98 | 27-Jan-10      |
| IFN-α | NCT00003239  | Chemotherapy and Biological Therapy in Treating Patients With Chronic Phase Chronic Myelogenous                                                                           | Completed | Leukemia                                                                                                                                                                                               | Biological: Recombinant Interferon Alfa Drug: Cytarabine Drug: Omacetaxine Mepesuccinate                                                                                                                                                            | Number of Patients with Complete Cytogenic Response                                                                                                                                                                                                                                                                                                                                                                                                                                                                                                               | Phase 2 | 90  | Mar-98 | 30-Jul-12      |
| IFN-α | NCT000026520 | Interferon Alfa and Thalidomide in Treating Patients With Stage IV                                                                                                        | Completed | Melanoma (Skin)                                                                                                                                                                                        | Biological: recombinant interferon alfa Drug: thalidomide                                                                                                                                                                                           |                                                                                                                                                                                                                                                                                                                                                                                                                                                                                                                                                                   | Phase 2 |     | Nov-01 | 24-Jun-13      |
| IFN-α | NCT00001113  | A Study of AZT Plus Human Interferon Alpha in the Treatment of AIDS-Related Kaposi's Sarcoma                                                                              | Completed | Sarcoma, Kaposi HIV Infections                                                                                                                                                                         | Drug: Interferon alfa-2a Drug: Zidovudine Drug: Interferon alfa-n1                                                                                                                                                                                  |                                                                                                                                                                                                                                                                                                                                                                                                                                                                                                                                                                   | Phase 1 | 48  |        | 16-Mar-12      |
| IFN-α | NCT00000725  | A Phase I Study of AZT and Human Interferon Alpha (Recombinant Alpha-2A and Lymphoblastoid) in the Treatment of AIDS-Associated                                           | Completed | Sarcoma, Kaposi HIV Infections                                                                                                                                                                         | Drug: Interferon alfa-2a Drug: Zidovudine Drug: Interferon alfa-n1                                                                                                                                                                                  |                                                                                                                                                                                                                                                                                                                                                                                                                                                                                                                                                                   | Phase 1 | 56  |        | 16-Mar-12      |
| IFN-α | NCT00002504  | Interleukin-2 Plus Interferon Alfa in Treating Adults With Metastatic Cancer                                                                                              | Completed | Chronic Myeloproliferative Disorders Leukemia Lymphoma Multiple Myeloma and Plasma Cell Neoplasm Myelodysplastic Syndromes Precancerous/Nonmalignant Condition Unspecified Adult Solid Tumor, Protocol | Biological: aldesleukin Biological: recombinant interferon alfa                                                                                                                                                                                     |                                                                                                                                                                                                                                                                                                                                                                                                                                                                                                                                                                   | Phase 2 |     | Aug-92 | 12-May-11      |
| IFN-α | NCT000059826 | Adjuvant Chemoradiotherapy and Interferon Alfa in Treating Patients With Resected Pancreatic Cancer                                                                       | Completed | Pancreatic Cancer                                                                                                                                                                                      | Biological: interferon-alfa-2b Drug: cisplatin Drug: 5-fluorouracil Radiation: radiation therapy                                                                                                                                                    | Overall survival at 18 months Toxicity Disease-free survival Local-regional disease control Distant disease control                                                                                                                                                                                                                                                                                                                                                                                                                                               | Phase 2 | 89  | Mar-03 | 7-Dec-16       |
| IFN-α | NCT000027742 | Temozolomide and Interferon Alfa in Treating Patients With Stage III or Stage IV Melanoma                                                                                 | Completed | Intraocular Melanoma Melanoma (Skin)                                                                                                                                                                   | Biological: pegylated interferon alfa Drug: temozolomide                                                                                                                                                                                            |                                                                                                                                                                                                                                                                                                                                                                                                                                                                                                                                                                   | Phase 2 |     | May-01 | 5-Jun-13       |
| IFN-α | NCT00004122  | BCG Plus Interferon Alfa 2b in Treating Patients With Bladder                                                                                                             | Completed | Bladder Cancer                                                                                                                                                                                         | Biological: BCG vaccine Biological: recombinant interferon alfa                                                                                                                                                                                     |                                                                                                                                                                                                                                                                                                                                                                                                                                                                                                                                                                   | Phase 2 |     | Jul-99 | 1-Feb-13       |
| IFN-α | NCT000030849 | Bexarotene and Interferon Alfa in Treating Patients With Cutaneous T-Cell Lymphoma                                                                                        | Completed | Lymphoma                                                                                                                                                                                               | Biological: recombinant interferon alfa Drug: bexarotene                                                                                                                                                                                            |                                                                                                                                                                                                                                                                                                                                                                                                                                                                                                                                                                   | Phase 2 |     | Oct-01 | April 4, 2013  |
| IFN-α | NCT00002470  | Fluorouracil Plus Interferon Alfa in Treating Patients With Advanced Metastatic Carcinoid Tumors                                                                          | Completed | Gastrointestinal Carcinoid Tumor Lung Cancer                                                                                                                                                           | Biological: recombinant interferon alfa Drug: fluorouracil                                                                                                                                                                                          |                                                                                                                                                                                                                                                                                                                                                                                                                                                                                                                                                                   | Phase 2 |     | Sep-90 | 15-May-13      |
| IFN-α | NCT00006384  | SU5416 and Interferon Alfa-2b in Treating Patients With Unresectable or Metastatic Kidney Cancer                                                                          | Completed | Kidney Cancer                                                                                                                                                                                          | Biological: recombinant interferon alfa Drug: semaxanib                                                                                                                                                                                             |                                                                                                                                                                                                                                                                                                                                                                                                                                                                                                                                                                   | Phase 2 |     | Nov-00 | 20-Oct-11      |

|       |             |                                                                                                                                                                                              |           |                                                                                                |                                                                                                                                                                    |                                                                                                                                                                                                                                                                                                                                                                                                                                                                                                                                                                                                                                                                                                                                                                                                                               |         |      |            |               |
|-------|-------------|----------------------------------------------------------------------------------------------------------------------------------------------------------------------------------------------|-----------|------------------------------------------------------------------------------------------------|--------------------------------------------------------------------------------------------------------------------------------------------------------------------|-------------------------------------------------------------------------------------------------------------------------------------------------------------------------------------------------------------------------------------------------------------------------------------------------------------------------------------------------------------------------------------------------------------------------------------------------------------------------------------------------------------------------------------------------------------------------------------------------------------------------------------------------------------------------------------------------------------------------------------------------------------------------------------------------------------------------------|---------|------|------------|---------------|
| IFN-α | NCT0004196  | Interferon Alfa-2b in Treating Patients With Melanoma and Early Lymph Node Metastasis                                                                                                        | Completed | Melanoma (Skin)                                                                                | Biological: recombinant interferon alfa Procedure: lymphangiography Drug: Observation                                                                              |                                                                                                                                                                                                                                                                                                                                                                                                                                                                                                                                                                                                                                                                                                                                                                                                                               | Phase 3 | 3000 | Oct-99     | 20-Jan-14     |
| IFN-α | NCT00045422 | Interferon Alfa and Imatinib Mesylate in Treating Patients With Chronic Myelogenous Leukemia                                                                                                 | Completed | Leukemia                                                                                       | Biological: recombinant interferon alfa Drug: imatinib mesylate                                                                                                    |                                                                                                                                                                                                                                                                                                                                                                                                                                                                                                                                                                                                                                                                                                                                                                                                                               | Phase 2 |      | April 2002 | 5-Jun-13      |
| IFN-α | NCT00005966 | Interferon Alfa-2b With or Without Thalidomide in Treating Patients With Metastatic or Unresectable Kidney                                                                                   | Completed | Kidney Cancer                                                                                  | Biological: recombinant interferon alfa Drug: thalidomide                                                                                                          |                                                                                                                                                                                                                                                                                                                                                                                                                                                                                                                                                                                                                                                                                                                                                                                                                               | Phase 3 |      | Oct-00     | 5-Feb-09      |
| IFN-α | NCT00003091 | High-Dose Interferon Alfa and Interleukin-2 in Treating Patients With Metastatic Kidney Cancer or                                                                                            | Completed | Kidney Cancer Melanoma (Skin)                                                                  | Biological: aldesleukin Biological: recombinant interferon alfa                                                                                                    |                                                                                                                                                                                                                                                                                                                                                                                                                                                                                                                                                                                                                                                                                                                                                                                                                               | Phase 2 | 40   | Jan-96     | 12-May-11     |
| IFN-α | NCT00014261 | Temozolomide Plus PEG-Interferon Alfa-2B in Treating Patients With Advanced Solid Tumors                                                                                                     | Completed | Unspecified Adult Solid Tumor, Protocol Specific                                               | Biological: PEG-interferon alfa-2b Drug: temozolomide                                                                                                              |                                                                                                                                                                                                                                                                                                                                                                                                                                                                                                                                                                                                                                                                                                                                                                                                                               | Phase 1 |      | Oct-00     | 30-Mar-18     |
| IFN-α | NCT00006343 | STI571 Compared With Interferon Alfa Plus Cytarabine in Treating Patients With Newly Diagnosed Chronic Myelogenous Leukemia                                                                  | Completed | Leukemia                                                                                       | Biological: recombinant interferon alfa Drug: cytarabine Drug: imatinib mesylate                                                                                   |                                                                                                                                                                                                                                                                                                                                                                                                                                                                                                                                                                                                                                                                                                                                                                                                                               | Phase 3 |      | Jun-00     | 3-Jan-13      |
| IFN-α | NCT01176552 | Granulocyte-macrophage Colony-stimulating Factor, Interferon and Interleukin-2 as Adjuvant Treatment for Renal Cancer                                                                        | Completed | Renal Cell Carcinoma                                                                           | Drug: GM-CSF, IFN alpha and IL-2                                                                                                                                   | Disease-free survival (DFS) Progression rate Overall survival (OS) Number of Participants with Adverse Events as a Measure of Safety and Tolerability                                                                                                                                                                                                                                                                                                                                                                                                                                                                                                                                                                                                                                                                         | Phase 2 | 35   | May-04     | 24-Aug-10     |
| IFN-α | NCT01359956 | Fotemustine and Dacarbazine Versus Dacarbazine +/- Alpha Interferon in Advanced Malignant                                                                                                    | Completed | Malignant Melanoma Recurrent Melanoma                                                          | Drug: Dacarbazine Drug: Fotemustine Drug: Interferon Alfa-2b                                                                                                       | overall survival progression free survival Response rate treatment related toxicity                                                                                                                                                                                                                                                                                                                                                                                                                                                                                                                                                                                                                                                                                                                                           | Phase 3 | 269  | April 2002 | April 2014 3, |
| IFN-α | NCT00002669 | Combination Chemotherapy, Interferon Alfa, and Interleukin-2 in Treating Patients With Metastatic                                                                                            | Completed | Melanoma (Skin)                                                                                | Biological: aldesleukin Biological: recombinant interferon alfa Drug: cisplatin Drug: dacarbazine                                                                  |                                                                                                                                                                                                                                                                                                                                                                                                                                                                                                                                                                                                                                                                                                                                                                                                                               | Phase 2 | 90   | Jun-95     | 2-Jul-12      |
| IFN-α | NCT00004244 | Interleukin-12 and Interferon Alfa in Treating Patients With Metastatic Kidney Cancer or Malignant                                                                                           | Completed | Kidney Cancer Melanoma (Skin)                                                                  | Biological: recombinant interferon alfa Biological: recombinant interleukin-12                                                                                     |                                                                                                                                                                                                                                                                                                                                                                                                                                                                                                                                                                                                                                                                                                                                                                                                                               | Phase 1 | 30   | Mar-00     | 21-Mar-13     |
| IFN-α | NCT01212367 | Intraleural Gene Transfer for Pleural Mesothelioma                                                                                                                                           | Completed | Malignant Pleural Mesothelioma                                                                 | Biological: SCH 721015                                                                                                                                             | To analyze gene transfer with two does separated by three-day interval                                                                                                                                                                                                                                                                                                                                                                                                                                                                                                                                                                                                                                                                                                                                                        | Phase 1 | 13   | Feb-09     | 22-Sep-15     |
| IFN-α | NCT00002737 | Interferon Alfa With or Without Isotretinoin in Treating Patients With Metastatic Kidney Cancer                                                                                              | Completed | Kidney Cancer                                                                                  | Biological: recombinant interferon alfa Drug: chemotherapy Drug: isotretinoin                                                                                      |                                                                                                                                                                                                                                                                                                                                                                                                                                                                                                                                                                                                                                                                                                                                                                                                                               | Phase 3 | 320  | Mar-96     | 11-Jul-12     |
| IFN-α | NCT00253474 | PEG-Interferon Alfa-2b in Treating Young Patients With Plexiform                                                                                                                             | Completed | Neoplasm of Uncertain Malignant Potential Unspecified Childhood Solid Tumor, Protocol Specific | Biological: PEG-interferon alfa-2a                                                                                                                                 |                                                                                                                                                                                                                                                                                                                                                                                                                                                                                                                                                                                                                                                                                                                                                                                                                               | Phase 1 | 36   | Sep-05     | 29-Mar-12     |
| IFN-α | NCT00308607 | Bevacizumab, Dacarbazine and Interferon-Alfa to Treat Metastatic Melanoma                                                                                                                    | Completed | Metastatic Melanoma                                                                            | Drug: Bevacizumab (Avastin) Drug: dacarbazine Drug: interferon-alfa-2a (Roferon-A)                                                                                 | Response rate according to RECIST criteria Progression-free survival Time to brain metastases Overall survival To evaluate safety of this combination after every two cycles Serum analysis of particular biochemical markers                                                                                                                                                                                                                                                                                                                                                                                                                                                                                                                                                                                                 | Phase 2 | 27   | Aug-05     | April 2009 3, |
| IFN-α | NCT00045279 | PEG-Interferon Alfa-2b in Treating Patients With Metastatic Kidney                                                                                                                           | Completed | Kidney Cancer                                                                                  | Biological: PEG-interferon alfa-2b                                                                                                                                 |                                                                                                                                                                                                                                                                                                                                                                                                                                                                                                                                                                                                                                                                                                                                                                                                                               | Phase 2 |      | April 2002 | 5-Jun-13      |
| IFN-α | NCT00861406 | Adjuvant Therapy of Pegylated Interferon- 2b Plus Melanoma                                                                                                                                   | Completed | Melanoma                                                                                       | Drug: Pegylated Interferon-Alfa 2b (PEG Intron) Drug: GP-100 Peptide Vaccine                                                                                       | Patient Maximum T-cell Levels During 24-Week Treatment                                                                                                                                                                                                                                                                                                                                                                                                                                                                                                                                                                                                                                                                                                                                                                        | Phase 1 | 38   | 10-Mar-09  | 3-Mar-17      |
| IFN-α | NCT01294618 | Nilotinib + Pegylated Interferon Alpha 2a for Untreated Chronic Phase Chronic Myelogenous Leukemia                                                                                           | Completed | Chronic Myelogenous Leukemia                                                                   | Drug: Nilotinib,Novartis,300 mg twice a day +Pegylated interferon 2a,Roche, 45 microg weekly starting Month 2-Month 12 or beyond according to investigator choice. | Cumulative incidence of complete molecular remissions after 12 months of treatment with nilotinib + Pegylated Interferon (PEG-IFN) Kinetics of Complete Molecular Response (CMR) at 1, 2, 3, 6, 9, 12, 15, 18 and 24 months. Stability of CMR : Proportion of patients maintaining their CMR at 18 and 24 months Kinetics of Major Molecular Response (MMR) at 1, 2, 3, 6, 9, 12, 15, 18 and 24 months. Stability of MMR : proportion of patients maintaining their MMR at 18 and 24 months Cumulative Complete Cytogenetic Remission (CCyR) rates at 3, 6 and 12 months. Safety (hematologic and non-hematologic) of the combination nilotinib + PEG-IFN Dose reductions or interruptions of each treatment studied Progression free survival. Overall survival. Quality of life on nilotinib + PEG-IFN Event free survival. | Phase 2 | 60   | Mar-11     | 28-May-19     |
| IFN-α | NCT00000694 | A Phase I Trial of Recombinant Human Granulocyte-Macrophage Colony Stimulating Factor (rHuGM-CSF), Recombinant Alpha Interferon and Azidothymidine (AZT) in AIDS-Associated Kaposi's Sarcoma | Completed | Sarcoma, Kaposi HIV Infections                                                                 | Drug: Interferon alfa-2b Drug: Zidovudine Drug: Sargramostim                                                                                                       |                                                                                                                                                                                                                                                                                                                                                                                                                                                                                                                                                                                                                                                                                                                                                                                                                               | Phase 1 | 18   |            | 23-May-12     |
| IFN-α | NCT00004104 | Vaccine Therapy Plus Interleukin-2 With or Without Interferon Alfa-2b in Treating Patients With Stage III                                                                                    | Completed | Melanoma (Skin)                                                                                | Biological: liposomal interleukin-2 Biological: polyvalent melanoma vaccine Biological: recombinant interferon                                                     |                                                                                                                                                                                                                                                                                                                                                                                                                                                                                                                                                                                                                                                                                                                                                                                                                               | Phase 2 |      | Jun-98     | 31-Mar-16     |

|       |             |                                                                                                                                                                  |           |                                                                                                                                     |                                                                                                                                                                                             |                                                                                                                                                                                                                                                                                                                                                             |         |     |            |            |
|-------|-------------|------------------------------------------------------------------------------------------------------------------------------------------------------------------|-----------|-------------------------------------------------------------------------------------------------------------------------------------|---------------------------------------------------------------------------------------------------------------------------------------------------------------------------------------------|-------------------------------------------------------------------------------------------------------------------------------------------------------------------------------------------------------------------------------------------------------------------------------------------------------------------------------------------------------------|---------|-----|------------|------------|
| IFN-α | NCT00053820 | Interferon Alfa With or Without Interleukin-2 and Fluorouracil in Treating Patients With Advanced                                                                | Completed | Kidney Cancer                                                                                                                       | Biological: aldesleukin Biological: recombinant interferon alfa Drug: fluorouracil                                                                                                          | Survival Time to progression as measured by RECIST criteria Comparison of toxicity levels (Grade III and IV) Comparison of quality of life before, during, after completion of study treatment Impact of the treatment regimens on health economics                                                                                                         | Phase 3 | 670 | Jul-02     | 19-Dec-13  |
| IFN-α | NCT03087929 | Follow-up Trial of Rituximab Interferon Transplant Trial: Study Drug-Rituximab and Alpha Interferon                                                              | Completed | Lymphoma, Follicular                                                                                                                | Other: Follow up                                                                                                                                                                            | Overall survival Progression-free survival Event-free survival Adverse events possibly or probably related to transplant Minimal Residual Disease                                                                                                                                                                                                           |         | 12  | 20-Sep-13  | 23-Mar-17  |
| IFN-α | NCT01162785 | 1B Intravesical Administration of SCH 721015 (Ad-IFNα) in Admixture With SCH 209702 (Syn3) for The Treatment of BCG Refractory                                   | Completed | Bladder Cancer                                                                                                                      | Drug: SCH 721015                                                                                                                                                                            | Safety + Tolerability of 2 Instillations of Intravesical SCH 721015 in Admixture with Novel Excipient SCH 209702 (Syn3) on Day 1 and Day 4                                                                                                                                                                                                                  | Phase 1 | 7   | April 2011 | 28-Nov-16  |
| IFN-α | NCT00045370 | Chemotherapy and Biological Therapy in Treating Patients With Locally Advanced or Metastatic                                                                     | Completed | Kidney Cancer                                                                                                                       | Biological: recombinant interferon alfa Drug: temsirolimus                                                                                                                                  |                                                                                                                                                                                                                                                                                                                                                             | Phase 1 |     | April 2002 | 5-Jun-13   |
| IFN-α | NCT00276523 | PEG-interferon Alfa-2b in Treating Patients With Stage II, Stage III, or Stage IV Head and Neck Cancer That Can Be Removed By Surgery                            | Completed | Head and Neck Cancer                                                                                                                | Biological: PEG-interferon alfa-2b Procedure: Conventional surgery Procedure: Neoadjuvant therapy                                                                                           | Response rate Toxicity                                                                                                                                                                                                                                                                                                                                      | Phase 2 | 3   | Feb-04     | 31-Oct-12  |
| IFN-α | NCT00002506 | Isotretinoin Plus Interferon in Treating Patients With Recurrent Cancer                                                                                          | Completed | Cervical Cancer Esophageal Cancer Head and Neck Cancer Lung Cancer Non-melanomatous Skin                                            | Biological: recombinant interferon alfa Drug: isotretinoin                                                                                                                                  |                                                                                                                                                                                                                                                                                                                                                             | Phase 2 |     | Aug-92     | 12-May-11  |
| IFN-α | NCT00053807 | Interleukin-2, Interferon Alfa, and Fluorouracil Compared With Observation in Treating Patients Who Have Undergone Surgery for                                   | Completed | Kidney Cancer                                                                                                                       | Biological: aldesleukin Biological: recombinant interferon alfa Drug: fluorouracil Procedure: adjuvant therapy                                                                              |                                                                                                                                                                                                                                                                                                                                                             | Phase 3 | 96  | Feb-98     | 24-Sep-12  |
| IFN-α | NCT00003195 | Total-Body Irradiation, Busulfan, and Interferon Alfa Followed by Peripheral Stem Cell or Bone Marrow Transplantation in Treating Patients With Multiple Myeloma | Completed | Multiple Myeloma and Plasma Cell Neoplasm                                                                                           | Biological: recombinant interferon alfa Drug: busulfan Procedure: allogeneic bone marrow transplantation Procedure: peripheral blood stem cell transplantation Radiation: radiation therapy |                                                                                                                                                                                                                                                                                                                                                             | Phase 2 |     | Dec-97     | 17-Nov-11  |
| IFN-α | NCT00019474 | Combination Chemotherapy Plus Interferon Alfa Followed by Filgrastim in Treating Patients With Gastrointestinal Tract Cancer                                     | Completed | Extrahepatic Bile Duct Cancer Gastric Cancer Gastrointestinal Carcinoid Tumor Liver Cancer Pancreatic Cancer Small Intestine Cancer | Biological: filgrastim Biological: recombinant interferon alfa Drug: fluorouracil Drug: hydroxyurea                                                                                         |                                                                                                                                                                                                                                                                                                                                                             | Phase 2 | 60  | Mar-98     | 14-Sep-18  |
| IFN-α | NCT00250796 | Trial of Thalidomide, α- Interferon +/- Octreotide in Patients With Unresectable Hepatocellular                                                                  | Completed | Liver Cancer                                                                                                                        | Drug: Thalidomide, alpha interferon Drug: Thalidomide, interferon, Octreotide                                                                                                               | Determine the response rate and time to progression of the combination of thalidomide, interferon, and octreotide in patients with unresectable hepatocellular carcinoma.                                                                                                                                                                                   | Phase 2 | 12  | Sep-00     | 7-Jan-10   |
| IFN-α | NCT01933906 | Addition of P1101 to Imatinib Treatment in Patients With Chronic Phase Chronic Myeloid Leukaemia Not Achieving a Complete Molecular                              | Completed | Chronic Phase Chronic Myeloid Leukemia                                                                                              | Drug: P1101                                                                                                                                                                                 | Number and seriousness of adverse events to evaluate safety and tolerability Efficacy (Number of patients achieving an improvement of remission status)                                                                                                                                                                                                     | Phase 1 | 12  | 30-Aug-13  | 4-Jan-19   |
| IFN-α | NCT00050531 | High-Dose Gleevec Alone or in Combination With Peg-Intron and GM-CSF in Early Phase Chronic Myelogenous Leukemia (CML)                                           | Completed | Leukemia, Myeloid, Chronic                                                                                                          | Drug: Gleevec Drug: Peg-alpha interferon (Peg-Intron) Drug: Sargramostim (GM-CSF)                                                                                                           | Duration of Pathological Complete Response Negativity or Cytogenetic Response Number of Participants with Complete Hematologic Remission (CHR) Classification of Complete Cytogenetic Response                                                                                                                                                              | Phase 3 | 94  | April 2003 | 11-May-16  |
| IFN-α | NCT00238329 | PEG-Interferon Alfa-2b and Thalidomide in Treating Patients With Recurrent or Metastatic Melanoma                                                                | Completed | Intraocular Melanoma Melanoma (Skin)                                                                                                | Biological: PEG-interferon alfa-2b Drug: thalidomide                                                                                                                                        | Response rate as measured scans and tumor measurements every 8 weeks Qualitative and quantitative toxicities at 30 days following study treatment Progression-free survival by standard life table and Kaplan-Meier Overall survival by standard life table and Kaplan-Meier Vascular flow to metastatic sites by positron-emission tomography scan every 8 | Phase 2 | 32  | Jan-01     | April 2013 |
| IFN-α | NCT00630084 | Peginterferon Plus Ribavirin for Hepatitis C Patients Concomitant With Malignancy Other Than Hepatocellular Carcinoma                                            | Completed | Chronic Hepatitis C Neoplasms                                                                                                       | Drug: pegylated interferon alpha 2a and plus ribavirin                                                                                                                                      | Efficacy - Sustained virological response (SVR), HCV RNA seronegative by PCR throughout 24-week off-treatment period. Rapid virologic response (RVR), HCV RNA seronegative by PCR at week 4. Early virological response (EVR), by PCR-negative or at least 2 logs decline from baseline of serum HCV RNA at 12 weeks of treatment. Safety -                 | Phase 4 | 120 | Aug-06     | 4-Sep-15   |
| IFN-α | NCT00633542 | Maintenance Therapy After Thalidomide-Dexamethasone(ThaDD) for Multiple                                                                                          | Completed | Multiple Myeloma                                                                                                                    | Drug: thalidomide Drug: interferon alpha                                                                                                                                                    | progression free survival overall survival safety                                                                                                                                                                                                                                                                                                           | Phase 3 | 103 | Jun-03     | 12-Mar-08  |
| IFN-α | NCT00483132 | Study of Treatment High Risk and/or Low Risk Acute Lymphoblastic leukemia(ALL) Adults Stage III                                                                  | Completed | Leukemia, Lymphocytic, Acute                                                                                                        | Drug: interferon alpha 2a                                                                                                                                                                   | overall survival Efficacy of study treatments                                                                                                                                                                                                                                                                                                               | Phase 3 | 232 | Sep-94     | 6-Jun-07   |
| IFN-α | NCT00273247 | Treatment With IFN After Curative Resection of HCC in HCV-Related Cirrhosis                                                                                      | Completed | Hepatocellular Carcinoma Hepatitis C Virus Infection Liver Cirrhosis Interferon Treatment Hepatic Resection                         | Drug: Interferon alpha-2b                                                                                                                                                                   | Recurrence Free Survival Disease Specific Survival Overall Patient Survival                                                                                                                                                                                                                                                                                 | Phase 3 | 150 | Jun-98     | 9-Jan-06   |



|       |             |                                                                                                                                                                                                                           |           |                                 |                                                                                                                                                                                                                                                              |                                                                                                                                                                                                                                                                                                                                                                                                                                                                                                                                                                                                                                                                                                                                                                                                                                                                                                                                                                                                                                                                                                                                                                                                                                                                 |                 |      |           |           |
|-------|-------------|---------------------------------------------------------------------------------------------------------------------------------------------------------------------------------------------------------------------------|-----------|---------------------------------|--------------------------------------------------------------------------------------------------------------------------------------------------------------------------------------------------------------------------------------------------------------|-----------------------------------------------------------------------------------------------------------------------------------------------------------------------------------------------------------------------------------------------------------------------------------------------------------------------------------------------------------------------------------------------------------------------------------------------------------------------------------------------------------------------------------------------------------------------------------------------------------------------------------------------------------------------------------------------------------------------------------------------------------------------------------------------------------------------------------------------------------------------------------------------------------------------------------------------------------------------------------------------------------------------------------------------------------------------------------------------------------------------------------------------------------------------------------------------------------------------------------------------------------------|-----------------|------|-----------|-----------|
| IFN-α | NCT02174172 | A Study to Assess the Safety and Tolerability of Atezolizumab in Combination With Other Immune-Modulating Therapies in Participants With Locally Advanced or Metastatic Solid Tumors                                      | Completed | Solid Cancers                   | Drug: Atezolizumab Drug: Bevacizumab Drug: Interferon alfa-2b Drug: Ipilimumab Drug: Obinutuzumab Drug: PEG-interferon alfa-2a                                                                                                                               | Recommended Phase II Dose (RP2D) of Atezolizumab When Given in Combination With Ipilimumab and Interferon Alfa-2b Percentage of Participants with Adverse Events Percentage of Participants with Best Overall Response, as Assessed Using Conventional Response Evaluation Criteria in Solid Tumors (RECIST) v1.1 Percentage of Participants with Best Overall Response, as Assessed Using Immune Modified RECIST Criteria Duration of Objective Response Overall Survival Progression-Free Survival Percentage of Participants with Objective Response, as Assessed Using Conventional RECIST v1.1 Percentage of Participants with Objective Response, as Assessed Using Immune Modified RECIST Criteria Serum Atezolizumab Concentration Serum Ipilimumab Concentration Serum Bevacizumab Concentration Serum Obinutuzumab Concentration Anti-Drug Antibody to Atezolizumab Anti-Drug Antibody to Ipilimumab Anti-Drug Antibody to Bevacizumab Anti-Drug Antibody to Obinutuzumab                                                                                                                                                                                                                                                                             | Phase 1         | 158  | 18-Aug-14 | 9-Jan-20  |
| IFN-α | NCT01637532 | Feasibility of the Combination of Chemotherapy (Carbo/Caelyx or Carbo/Doxorubicin) With Tocilizumab (mAb IL-6R) and Peg-Intron in Patients With Recurrent Ovarian                                                         | Completed | Recurrent Ovarian Cancer        | Drug: tocilizumab and interferon alpha 2-b Drug: Carboplatin and Caelyx or doxorubicin                                                                                                                                                                       | The feasibility (NCI-CTCv4.0) to combine carboplatin and PLD or doxorubicin with tocilizumab as well as with tocilizumab and Peg-Intron The effect of chemo-immunotherapy on the immune system The relation between anti-tumor immunity and clinical outcome                                                                                                                                                                                                                                                                                                                                                                                                                                                                                                                                                                                                                                                                                                                                                                                                                                                                                                                                                                                                    | Phase 1 Phase 2 | 21   | Feb-11    | 26-Jan-16 |
| IFN-α | NCT00980213 | Evaluation of the Cost and Effectiveness Sunitinib Compared to Interferon-Alfa in Finland                                                                                                                                 | Completed | Neoplasms Renal Cell Carcinoma  | Drug: sunitinib                                                                                                                                                                                                                                              | Incremental cost per incremental time to treatment failure (TTF) in first-line treatment Health related quality of life (HRQoL)                                                                                                                                                                                                                                                                                                                                                                                                                                                                                                                                                                                                                                                                                                                                                                                                                                                                                                                                                                                                                                                                                                                                 |                 | 80   | Sep-09    | 6-Feb-14  |
| IFN-α | NCT00291369 | Cytokines in Patients With Metastatic Renal Cell Carcinoma of Intermediate Prognosis                                                                                                                                      | Completed | Metastatic Renal Cell Carcinoma | Drug: Interleukin-2 Drug: Interferon alfa Drug: medroxyprogesterone acetate                                                                                                                                                                                  | Overall survival Progression-free survival Objective response rate Toxicity Quality of life                                                                                                                                                                                                                                                                                                                                                                                                                                                                                                                                                                                                                                                                                                                                                                                                                                                                                                                                                                                                                                                                                                                                                                     | Phase 3         | 456  | Dec-99    | 16-Feb-06 |
| IFN-α | NCT00329368 | Safety and Tolerability Study of FolateImmune in Combination With Cytokines in Patients With Refractory or Metastatic Cancer                                                                                              | Completed | Cancer                          | Biological: EC90 (KLH-FITC) Biological: GPI-0100 Drug: EC17 (Folate-FITC) Drug: Interleukin-2 Drug: Interferon-alpha                                                                                                                                         | Safety Tolerability Anti-tumor Activity                                                                                                                                                                                                                                                                                                                                                                                                                                                                                                                                                                                                                                                                                                                                                                                                                                                                                                                                                                                                                                                                                                                                                                                                                         | Phase 1         | 13   | Sep-05    | 9-Mar-12  |
| IFN-α | NCT00055874 | Imatinib Mesylate With or Without Interferon Alfa or Cytarabine Compared With Interferon Alfa Followed by Donor Stem Cell Transplant in Treating Patients With Newly Diagnosed Chronic Phase Chronic Myelogenous Leukemia | Completed | Leukemia                        | Biological: recombinant interferon alfa Drug: cytarabine Drug: hydroxyurea Drug: imatinib mesylate Procedure: allogeneic bone marrow transplantation Procedure: autologous bone marrow transplantation Procedure: peripheral blood stem cell transplantation | Overall survival Risk group-dependent survival Progression-free survival Hematologic, cytogenetic, and molecular response rates Adverse drug effects Quality of life                                                                                                                                                                                                                                                                                                                                                                                                                                                                                                                                                                                                                                                                                                                                                                                                                                                                                                                                                                                                                                                                                            | Phase 3         | 1551 | Jun-02    | 3-May-18  |
| IFN-α | NCT01351571 | An Observational Study of Avastin (Bevacizumab) in Combination With Interferon Alpha-2a as First-Line Treatment in Patients With Advanced and/or Metastatic Renal Cell                                                    | Completed | Renal Cell Cancer               |                                                                                                                                                                                                                                                              | Safety: Incidence of adverse events Progression-free survival: time from first drug administration to documented disease progression or death of any cause Overall response rate: complete response or partial response according to RECIST criteria Overall survival                                                                                                                                                                                                                                                                                                                                                                                                                                                                                                                                                                                                                                                                                                                                                                                                                                                                                                                                                                                           |                 | 5    | Aug-10    | 4-Oct-17  |
| IFN-α | NCT00002868 | Interferon-alfa With or Without Chemotherapy and Peripheral Stem Cell Transplantation in Treating Patients With Newly Diagnosed Chronic Myelogenous Leukemia                                                              | Completed | Leukemia                        | Biological: filgrastim Biological: recombinant interferon alfa Drug: busulfan Drug: cytarabine Drug: etoposide Drug: hydroxyurea Drug: idarubicin Procedure: peripheral blood stem cell transplantation                                                      |                                                                                                                                                                                                                                                                                                                                                                                                                                                                                                                                                                                                                                                                                                                                                                                                                                                                                                                                                                                                                                                                                                                                                                                                                                                                 | Phase 3         | 744  | Jan-96    | 10-Feb-15 |
| IFN-α | NCT00390897 | Glivec® (Imatinib Mesylate, STI571) in Monotherapy Versus Glivec® - Interferon Alpha in the Treatment of Chronic-Phase Chronic Myeloid Leukaemia                                                                          | Completed | Chronic Myeloid Leukaemia       | Drug: Glivec Drug: Interferon                                                                                                                                                                                                                                | The fundamental objective of this study is to compare the therapeutic efficacy of Glivec® given in monotherapy (providing for dose scaling according to the response obtained at different periods of time from the beginning) in combination with standard in The median survival of patients with CML is close to 7 years. One year and a half after diagnosis, the rate of progression to the acceleration phase and blastic crisis is very low (3.3%) in patients treated with Glivec® as first line. With the treatments available hitherto, the achievement of a major cytogenetic response and above all cytogenetic response translates into a prolongation of survival. Therefore, taking into account that the rate of complete cytogenetic responses to Glivec® in newly-diagnosed CML is 76% after 18 months of treatment (see table 1), the fundamental objective of the study will be to compare the rate of complete cytogenetic The time until complete cytogenetic responses are obtained Rate of major cytogenetic responses Rate of molecular responses Time to the loss of cytogenetic, haematological or molecular response Time to the progression of the disease to the phases of acceleration and blastic crisis (analysed according to | Phase 4         | 360  | Jul-03    | 27-Nov-08 |

|       |              |                                                                                                                                                                     |           |                                                                                |                                                                                                                                                                                                                    |                                                                                                                                                                                                                                                    |                 |     |           |                |
|-------|--------------|---------------------------------------------------------------------------------------------------------------------------------------------------------------------|-----------|--------------------------------------------------------------------------------|--------------------------------------------------------------------------------------------------------------------------------------------------------------------------------------------------------------------|----------------------------------------------------------------------------------------------------------------------------------------------------------------------------------------------------------------------------------------------------|-----------------|-----|-----------|----------------|
| IFN-α | NCT00041327  | Combination Chemotherapy Followed By Antiviral Therapy and Interferon Alfa in Treating Patients With HTLV-1-Related Adult T-Cell Leukemia/Lymphoma                  | Completed | Lymphoma                                                                       | Biological: filgrastim Biological: recombinant interferon alfa Drug: Etoposide Drug: cyclophosphamide Drug: doxorubicin hydrochloride Drug: lamivudine Drug: prednisone Drug: vincristine sulfate Drug: zidovudine | Efficacy Duration of response Effects on markers of virus replication and expression and immune function Toxicity                                                                                                                                  | Phase 2         | 19  | Oct-02    | 3-Feb-16       |
| IFN-α | NCT00581425  | Intron-A/Aldara Combination Therapy for Basal Cell Carcinoma (BCC)                                                                                                  | Completed | Basal Cell Carcinoma                                                           | Biological: Imiquimod and Interferon alpha                                                                                                                                                                         | resolution of basal cell carcinoma resolution of basal cell carcinoma at a lower cost and less inflammation.                                                                                                                                       | Phase 4         | 49  | Dec-07    | 25-Jan-13      |
| IFN-α | NCT01603212  | Systemic Therapy With Interferon, Interleukin-2 and BRAF Inhibitor                                                                                                  | Completed | Melanoma                                                                       | Drug: Vemurafenib Drug: IL-2 Drug: Interferon Alpha-2b                                                                                                                                                             | Maximum Tolerated Dose (MTD) of Vemurafenib in Combination With Interferon Alpha 2b and IL-2 Progression-Free Survival (PFS)                                                                                                                       | Phase 1         | 6   | 18-Jul-13 | 21-May-19      |
| IFN-α | NCT00003263  | Cisplatin, Interferon Alfa, Surgery, and Radiation Therapy in Treating Patients With Malignant Pleural                                                              | Completed | Malignant Mesothelioma                                                         | Biological: recombinant interferon alfa Drug: cisplatin Procedure: surgical procedure Radiation: radiation therapy                                                                                                 |                                                                                                                                                                                                                                                    | Phase 1         | 6   | Aug-96    | April 17, 2013 |
| IFN-α | NCT00002734  | Radiolabeled Monoclonal Antibody, Paclitaxel, and Interferon Alfa in Treating Patients With Recurrent Ovarian Cancer                                                | Completed | Ovarian Cancer Primary Peritoneal Cavity Cancer                                | Biological: recombinant interferon alfa Drug: chemotherapy Drug: paclitaxel Drug: topotecan hydrochloride Radiation: lutetium Lu 177 monoclonal antibody CC49 Radiation: yttrium Y 90 monoclonal                   |                                                                                                                                                                                                                                                    | Phase 1         | 30  | Mar-96    | 5-Feb-13       |
| IFN-α | NCT00416429  | Medroxyprogesterone or Interferon and/or Aldesleukin in Treating Patients With Metastatic Kidney                                                                    | Completed | Kidney Cancer                                                                  | Biological: aldesleukin Biological: recombinant interferon alpha-2a Drug: medroxyprogesterone                                                                                                                      | Overall survival Objective response rate (complete and partial) Progression-free survival Toxicity Quality of life in week 10                                                                                                                      | Phase 3         | 456 |           | 26-Sep-12      |
| IFN-α | NCT03066947  | SV-BR-1-GM in Metastatic or Locally Recurrent Breast Cancer                                                                                                         | Completed | Breastcancer Breast Neoplasm                                                   | Biological: SV-BR-1-GM Drug: Cyclophosphamide Biological: Interferon-alpha-2b                                                                                                                                      | Incidence of Treatment Emergent Adverse Events [Safety] Duration of Treatment Emergent Adverse Events [Safety] Relationship of Adverse Events to SV-BR-1-GM [Safety] Objective Tumor Response Rate Rate of Non-progression of Tumors Durability of | Phase 1 Phase 2 | 24  | 5-May-17  | 17-Dec-18      |
| IFN-α | NCT00001428  | A Phase II Study of 5-Fluorouracil Administered as a One Hour Infusion in Combination With Calcium Leucovorin and Interferon Alpha-2A in Advanced Colorectal Cancer | Completed | Colorectal Neoplasms                                                           | Drug: 5-fluorouracil                                                                                                                                                                                               |                                                                                                                                                                                                                                                    | Phase 2         | 65  | Feb-95    | 4-Mar-08       |
| IFN-α | NCT00660270  | Chemotherapy and Radiation Following Pancreatic Surgery                                                                                                             | Completed | Pancreatic Cancer                                                              | Procedure: Pancreatic Surgery Radiation: Radiation therapy Drug: Cisplatin Drug: 5-FU Drug: Alpha-interferon Drug:                                                                                                 | To describe the overall survival and disease-free survival To describe the toxicities associated with adjuvant chemoradiation with cisplatin, 5FU and interferon alfa followed by gemcitabine in patients with pancreatic cancers.                 | Phase 2         | 53  | May-02    | April 23, 2013 |
| IFN-α | NCT00323505  | A Phase II Trial Comparing the Quality of Life, Tolerability and Toxicity of PEG Intron With INTRON® A in Patients With Multiple                                    | Completed | Multiple Myeloma                                                               | Drug: Pegylated Interferon Drug: Interferon-alpha2a                                                                                                                                                                |                                                                                                                                                                                                                                                    | Phase 2         |     | Mar-01    | 9-May-06       |
| IFN-α | NCT00000764  | Chemoprevention of Anal Neoplasia Arising Secondary to Anogenital Human Papillomavirus Infection in Persons With HIV Infection.                                     | Completed | HIV Infections Anus Neoplasms                                                  | Drug: Isotretinoin Drug: Interferon alfa-2a                                                                                                                                                                        |                                                                                                                                                                                                                                                    | Phase 1         | 98  |           | April 2, 2012  |
| IFN-α | NCT00002733  | Biological Therapy in Treating Patients With Metastatic Cancer                                                                                                      | Completed | Kidney Cancer Melanoma (Skin) Unspecified Adult Solid Tumor, Protocol Specific | Biological: aldesleukin Biological: recombinant interferon alfa Biological: therapeutic tumor infiltrating                                                                                                         |                                                                                                                                                                                                                                                    | Phase 2         | 30  | Jan-96    | 11-May-11      |
| IFN-α | NCT00002556  | Combination Chemotherapy With or Without High Dose Cyclophosphamide and Recombinant Interferon Alfa-2b in Treating Patients With Previously                         | Completed | Stage I Multiple Myeloma Stage II Multiple Myeloma Stage III Multiple Myeloma  | Drug: vincristine sulfate Drug: carmustine Drug: melphalan Drug: cyclophosphamide Drug: prednisone Biological: recombinant interferon alfa-2b Other: laboratory                                                    | Median survival Objective response, evaluated using the following ECOG Myeloma Response Criteria                                                                                                                                                   | Phase 3         | 312 | Jul-94    | 31-May-13      |
| IFN-α | NCT000030342 | Biological Therapy and Chemotherapy in Treating Patients With Metastatic Kidney Cancer or                                                                           | Completed | Colorectal Cancer Kidney Cancer                                                | Biological: recombinant interferon alfa Biological: sargramostim Biological: therapeutic autologous lymphocytes Drug:                                                                                              | Response as measured by RECIST guidelines and Kaplan-Meier method at 5 years Survival as measured by the Kaplan-Meier method at 5 years Safety as measured by NCI common toxicity table at study completion                                        | Phase 1 Phase 2 | 60  | Nov-01    | 26-Jun-13      |
| IFN-α | NCT01622933  | Multiple Antigen-Engineered DC Vaccine for Melanoma                                                                                                                 | Completed | Melanoma                                                                       | Biological: DC Vaccine + IFN Biological: AdVTMM2/DC Vaccination                                                                                                                                                    | Safety Immunological response (antigen-specific T cell activation)                                                                                                                                                                                 | Phase 1         | 35  | Jun-12    | 31-Aug-17      |
| IFN-α | NCT00006385  | Vaccine Therapy With or Without Biological Therapy in Treating Patients With Metastatic Melanoma                                                                    | Completed | Melanoma (Skin)                                                                | Biological: MART-1 antigen Biological: gp100 antigen Biological: incomplete Freund's adjuvant Biological: recombinant interferon alfa Biological: sargramostim Biological: tyrosinase peptide                      |                                                                                                                                                                                                                                                    | Phase 2         |     | Sep-00    | 8-Nov-11       |
| IFN-α | NCT000054561 | Isotretinoin, Interferon Alfa, and Vitamin E in Treating Patients With Stage III or Stage IV Head and Neck                                                          | Completed | Head and Neck Cancer                                                           | Biological: recombinant interferon alfa Dietary Supplement: vitamin E Drug: isotretinoin Procedure: adjuvant therapy                                                                                               |                                                                                                                                                                                                                                                    | Phase 3         |     | Aug-03    | 2-Jan-19       |
| IFN-α | NCT00416871  | Interleukin-2 and Interferon in Treating Patients With Metastatic                                                                                                   | Completed | Kidney Cancer                                                                  | Biological: aldesleukin Biological: recombinant interferon alfa                                                                                                                                                    |                                                                                                                                                                                                                                                    | Phase 3         | 220 |           | 26-Sep-12      |
| IFN-α | NCT00574730  | CHOP/Rituximab Followed by Maintenance PEG Intron in Treatment of Indolent/Follicular Non-Hodgkin's Lymphoma                                                        | Completed | Non-Hodgkins Lymphoma                                                          | Drug: CHOP/Rituximab Drug: PEG INTRON                                                                                                                                                                              | Time to Treatment Failure/Duration of Response/Time to Treatment Failure/Survival Biologic/Immunologic Evaluation on Study                                                                                                                         | Not Applicable  | 27  | May-01    | 24-Jan-18      |

|       |             |                                                                                                                                                            |           |                                                                                                                                                                                                              |                                                                                                                                                                                                                                                                  |                                                                                                                                                                                                                                                            |                 |     |            |                |
|-------|-------------|------------------------------------------------------------------------------------------------------------------------------------------------------------|-----------|--------------------------------------------------------------------------------------------------------------------------------------------------------------------------------------------------------------|------------------------------------------------------------------------------------------------------------------------------------------------------------------------------------------------------------------------------------------------------------------|------------------------------------------------------------------------------------------------------------------------------------------------------------------------------------------------------------------------------------------------------------|-----------------|-----|------------|----------------|
| IFN-α | NCT00014092 | Chemotherapy Followed by Biological Therapy in Treating Patients With Stage IV Melanoma That Cannot be Treated With                                        | Completed | Melanoma (Skin)                                                                                                                                                                                              | Biological: aldesleukin Biological: recombinant interferon alfa Biological: sargramostim Drug: temozolomide                                                                                                                                                      |                                                                                                                                                                                                                                                            | Phase 2         |     | Dec-99     | 26-Mar-13      |
| IFN-α | NCT00619268 | Combination of Temsirolimus and Bevacizumab in Patient With Metastatic Renal Cell Carcinoma                                                                | Completed | Metastatic Renal Cell Carcinoma                                                                                                                                                                              | Drug: Temsirolimus Drug: Bevacizumab Drug: Sunitinib Drug: Interferon alpha-2a                                                                                                                                                                                   | progression-free rate Objective response rate:efficacy Duration of response Toxicity Quality of life progression-free survival and overall survival                                                                                                        | Phase 2         | 160 | Feb-08     | 15-Feb-13      |
| IFN-α | NCT00003416 | S9805, High-Dose Melphalan Plus Peripheral Stem Cell Transplantation Followed by Interferon Alfa in Treating Patients With Waldenstrom's Macroglobulinemia | Completed | Lymphoma                                                                                                                                                                                                     | Biological: filgrastim Biological: recombinant interferon alfa Drug: dexamethasone Drug: melphalan Procedure: peripheral blood stem cell transplantation                                                                                                         | confirmed remission rate overall survival (OS) progression free survival (PFS) toxicity                                                                                                                                                                    | Phase 2         | 9   | Sep-98     | 6-Mar-15       |
| IFN-α | NCT00005948 | Chemotherapy Followed by Peripheral Stem Cell Transplantation And Biological Therapy in Treating Patients With Chronic Myelogenous                         | Completed | Leukemia                                                                                                                                                                                                     | Biological: aldesleukin Biological: recombinant interferon alfa Biological: sargramostim Drug: busulfan Procedure: peripheral blood stem cell transplantation                                                                                                    |                                                                                                                                                                                                                                                            | Phase 2         |     | Jan-00     | April 2, 2010  |
| IFN-α | NCT00003027 | Combination Chemotherapy With or Without Interleukin-2 and Interferon Alfa in Treating Patients With Metastatic Melanoma                                   | Completed | Melanoma (Skin)                                                                                                                                                                                              | Biological: aldesleukin Biological: filgrastim Biological: recombinant interferon alfa Drug: cisplatin Drug: dacarbazine Drug: vinblastine                                                                                                                       | Overall survival Response rate (complete and partial response) Durable complete response rate Response duration                                                                                                                                            | Phase 3         | 482 | Oct-97     | 29-Jan-10      |
| IFN-α | NCT00003007 | Interferon Alfa Following Chemotherapy and Peripheral Stem Cell Transplantation in Treating Patients With Stage III or Stage IV                            | Completed | Multiple Myeloma and Plasma Cell Neoplasm                                                                                                                                                                    | Biological: recombinant interferon alfa Biological: sargramostim Drug: cyclophosphamide Drug: dexamethasone Drug:                                                                                                                                                |                                                                                                                                                                                                                                                            | Phase 2         |     | Jul-96     | 26-Jun-13      |
| IFN-α | NCT00891475 | Palliative Radiofrequency Ablation in Metastatic Renal Cell Carcinoma Patients                                                                             | Completed | Carcinoma, Renal Cell                                                                                                                                                                                        | Procedure: Radiofrequency ablation; Interferon-alpha Procedure: Radiofrequency ablation; Sunitinib                                                                                                                                                               | Progression-free survival Overall survival rate of complications time from the end of ablation to start of medical treatment Quality of life (QOL)                                                                                                         | Phase 1 Phase 2 | 114 | May-08     | 13-Feb-14      |
| IFN-α | NCT01490853 | Follow-up of Ph+ Chronic Myeloid Leukemia Patients in Complete Cytogenetic Response With Interferon Based Therapy                                          | Completed | Chronic Myeloid Leukemia                                                                                                                                                                                     | Drug: Interferon alpha                                                                                                                                                                                                                                           | Progression Free Survival Duration of Complete Cytogenetic Response (CCgR) Overall Survival                                                                                                                                                                |                 | 116 | Oct-09     | 13-Nov-18      |
| IFN-α | NCT00002598 | Combination Chemotherapy and Interferon Alfa in Treating Patients With Chronic Myelogenous Leukemia                                                        | Completed | Leukemia                                                                                                                                                                                                     | Biological: recombinant interferon alfa Biological: sargramostim Drug: cyclophosphamide Drug: cytarabine Drug: etoposide Drug: methotrexate Drug: mitoxantrone hydrochloride Procedure: bone marrow ablation with stem cell support Radiation: radiation therapy |                                                                                                                                                                                                                                                            | Phase 2         | 30  | Jun-94     | 25-Jun-13      |
| IFN-α | NCT00011934 | Bone Marrow Transplantation Plus Biological Therapy in Treating Patients With Chronic Myeloid                                                              | Completed | Leukemia                                                                                                                                                                                                     | Biological: recombinant interferon alfa Biological: sargramostim Procedure: autologous bone marrow transplantation                                                                                                                                               |                                                                                                                                                                                                                                                            | Phase 2         |     | May-98     | April 17, 2014 |
| IFN-α | NCT02576964 | A Study of Capecitabine (Xeloda) and Peginterferon Alfa-2a (Pegasy) in Treatment-Naive Participants With Advanced Liver Cancer                             | Completed | Carcinoma, Hepatocellular                                                                                                                                                                                    | Drug: Capecitabine Drug: Peginterferon alfa-2a                                                                                                                                                                                                                   | Objective response rate Time to disease progression Duration of response Overall survival Incidence of adverse events                                                                                                                                      | Phase 2         | 16  | Jan-05     | 2-Nov-16       |
| IFN-α | NCT00003172 | Comparison of Combination Chemotherapy Regimens in Treating Patients With Advanced Stomach                                                                 | Completed | Gastric Cancer                                                                                                                                                                                               | Biological: filgrastim Biological: recombinant interferon alfa Drug: docetaxel Drug: doxorubicin hydrochloride Drug:                                                                                                                                             |                                                                                                                                                                                                                                                            | Phase 2         |     | Dec-97     | 21-Jun-13      |
| IFN-α | NCT00897520 | Biomarkers in Patients With High-Risk Melanoma Receiving High-Dose Interferon Therapy                                                                      | Completed | Melanoma (Skin)                                                                                                                                                                                              | Biological: recombinant interferon alfa Genetic: proteomic profiling Other: immunoenzyme technique Other:                                                                                                                                                        | Serum sample screening via high throughput protein profiling in patients undergoing therapy Comparison of soluble factors                                                                                                                                  |                 | 40  | 14-Jan-08  | 19-May-17      |
| IFN-α | NCT00003408 | Biological Therapy Following Chemotherapy and Peripheral Stem Cell Transplantation in Treating Patients With Cancer                                        | Completed | Breast Cancer Chronic Myeloproliferative Disorders Gestational Trophoblastic Tumor Kidney Cancer Leukemia Lymphoma Multiple Myeloma and Plasma Cell Neoplasm Myelodysplastic Syndromes Neuroblastoma Ovarian | Biological: aldesleukin Biological: recombinant interferon alfa Biological: sargramostim                                                                                                                                                                         |                                                                                                                                                                                                                                                            | Phase 2         | 40  | April 1998 | 26-Mar-13      |
| IFN-α | NCT00004141 | Combination Chemotherapy Plus Biological Therapy in Treating Patients With Metastatic Melanoma                                                             | Completed | Melanoma (Skin)                                                                                                                                                                                              | Drug: Cisplatin Drug: dacarbazine Drug: Granulocyte-macrophage colony-stimulating factor                                                                                                                                                                         | Objective response rate                                                                                                                                                                                                                                    | Phase 2         | 46  | Aug-98     | 5-Sep-13       |
| IFN-α | NCT00761241 | Borderline Resectable Pancreatic Cancer: Gemcitabine/Docetaxel and Oxaliplatin Based Chemo/RT                                                              | Completed | Pancreatic Cancer                                                                                                                                                                                            | Drug: Gemcitabine, Docetaxel, 5FU, Oxaliplatin Biological: Alpha-interferon Radiation: Abdominal/pelvic radiation therapy Procedure:                                                                                                                             | Two year overall survival median disease free survival initial response rate to gemcitabine/docetaxel (tumor marker and radiographic) toxicity of overall regimen time to disease progression percentage of patients able to complete protocol to entirety | Phase 2         | 40  | Sep-08     | 26-May-10      |
| IFN-α | NCT00219739 | STI571 Prospective Randomized Trial: SPIRIT                                                                                                                | Completed | Chronic Myeloid Leukemia                                                                                                                                                                                     | Drug: Imatinib mesylate 400 mg Drug: Imatinib mesylate 600 mg Drug: Imatinib 400 mg + Peg-Interferon Drug: Imatinib mesylate 400 mg + Cytarabine                                                                                                                 | Overall survival improvement Molecular response improvement at 1 year Hematological, cytogenetic responses improvement Duration of responses improvement Survival without progression improvement Acceptable toxicity                                      | Phase 3         | 789 | Sep-03     | 11-Oct-16      |

|       |             |                                                                                                                                      |           |                                                                                                    |                                                                                                                                                                                                                                                                                                                                                                                       |                                                                                                                                                                                                                                                                                                                                                                                                                                                                                                                                                       |                 |     |            |           |
|-------|-------------|--------------------------------------------------------------------------------------------------------------------------------------|-----------|----------------------------------------------------------------------------------------------------|---------------------------------------------------------------------------------------------------------------------------------------------------------------------------------------------------------------------------------------------------------------------------------------------------------------------------------------------------------------------------------------|-------------------------------------------------------------------------------------------------------------------------------------------------------------------------------------------------------------------------------------------------------------------------------------------------------------------------------------------------------------------------------------------------------------------------------------------------------------------------------------------------------------------------------------------------------|-----------------|-----|------------|-----------|
| IFN-α | NCT0002548  | SWOG-9321 Melphalan, TBI, and Transplant vs Combo Chemo in Untreated Myeloma                                                         | Completed | Multiple Myeloma                                                                                   | Biological: recombinant interferon alfa Drug: carmustine Drug: cyclophosphamide Drug: dexamethasone Drug: doxorubicin hydrochloride Drug: melphalan Drug: prednisone Drug: vincristine sulfate Procedure: allogeneic bone marrow transplantation Procedure: autologous bone marrow transplantation Procedure: peripheral blood stem cell transplantation Radiation: radiation therapy | survival                                                                                                                                                                                                                                                                                                                                                                                                                                                                                                                                              | Phase 3         | 899 | Jan-94     | 6-Mar-15  |
| IFN-α | NCT01392729 | An Observational Study of Avastin (Bevacizumab) and Interferon Alpha 2a in Patients With Metastatic Renal Cell Cancer (VERA)         | Completed | Renal Cell Cancer                                                                                  |                                                                                                                                                                                                                                                                                                                                                                                       | Progression-free survival Overall survival Response rate Safety: Incidence of adverse events                                                                                                                                                                                                                                                                                                                                                                                                                                                          |                 | 40  | Sep-10     | 2-Nov-16  |
| IFN-α | NCT00970996 | Cisplatin, Temozolomide, Abraxane, With Interleukin-2 and Interferon for Metastatic Melanoma                                         | Completed | Melanoma                                                                                           | Drug: Temozolomide Drug: Abraxane Drug: Cisplatin Biological: Interleukin-2 Biological: Interferon alpha 2b                                                                                                                                                                                                                                                                           | Response Rate                                                                                                                                                                                                                                                                                                                                                                                                                                                                                                                                         | Phase 1         | 10  | Sep-09     | 3-Jan-13  |
| IFN-α | NCT01276730 | Advanced Cervical Cancer Trial in India                                                                                              | Completed | Cervical Cancer                                                                                    | Drug: Interferon, Retinoic Acid and radiation Drug: Cisplatin and radiation                                                                                                                                                                                                                                                                                                           | Survival Response rate Overall toxicity Determine immune response to Human Papillomavirus HPV                                                                                                                                                                                                                                                                                                                                                                                                                                                         | Phase 2         | 209 | Oct-07     | 29-Dec-17 |
| IFN-α | NCT00027773 | Vaccine Therapy, Chemotherapy, and GM-CSF in Treating Patients With Advanced Pancreatic Cancer                                       | Completed | Pancreatic Cancer                                                                                  | Biological: allogeneic tumor cell vaccine Biological: recombinant interferon alfa Biological: sargramostim Drug: cyclophosphamide                                                                                                                                                                                                                                                     |                                                                                                                                                                                                                                                                                                                                                                                                                                                                                                                                                       | Phase 2         |     | May-96     | 10-Jul-13 |
| IFN-α | NCT00205751 | Thalidomide/Dexamethasone vs MP for Induction Therapy and Thalidomide/Intron A vs Intron A for                                       | Completed | Multiple Myeloma                                                                                   | Drug: Thalidomide/Dexamethasone vs Melphalan/Prednisone                                                                                                                                                                                                                                                                                                                               | Time to progression Response rate Survival Time to response Toxicity Quality of life                                                                                                                                                                                                                                                                                                                                                                                                                                                                  | Phase 2 Phase 3 | 350 | Aug-01     | 25-Nov-13 |
| IFN-α | NCT00696735 | High-Dose Therapy Treatment in Patients With Follicular Lymphoma                                                                     | Completed | Follicular Lymphoma                                                                                | Procedure: chemotherapy Procedure: high dose therapy and autologous stem cell                                                                                                                                                                                                                                                                                                         | event free survival safety                                                                                                                                                                                                                                                                                                                                                                                                                                                                                                                            | Phase 3         | 172 | Jun-94     | 24-Oct-08 |
| IFN-α | NCT00221702 | PegIntron Versus IntronA in CMAJCC Stage II (EADO 2001/CMII)                                                                         | Completed | Melanoma Neoplasm Metastasis                                                                       | Drug: PegIntron Drug: intron A                                                                                                                                                                                                                                                                                                                                                        | disease-free survival time time to distant metastasis overall survival toxicity quality of life                                                                                                                                                                                                                                                                                                                                                                                                                                                       | Phase 3         | 898 | Jun-03     | 13-Oct-10 |
| IFN-α | NCT00559026 | Phase I/II Study of Chemo-Immunotherapy Combination in Melanoma Patients                                                             | Completed | Melanoma                                                                                           | Biological: Melan-A Other: Melan-A plus Dacarbazine                                                                                                                                                                                                                                                                                                                                   | Assessment of safety by evaluating local and systemic adverse reactions during the trial. Assessment of the vaccine-specific cellular immune responses Assessment of relapse-free survival and overall survival calculated from the time of the first chemotherapy/vaccine injection. Evaluation by microarray analysis of the gene expression                                                                                                                                                                                                        | Phase 1         | 10  | Sep-04     | 16-Nov-07 |
| IFN-α | NCT00001567 | A Phase II Efficacy Study of Roferon-A in Hairy Cell Leukemia                                                                        | Completed | Hairy Cell Leukemia                                                                                | Drug: Roferon-A                                                                                                                                                                                                                                                                                                                                                                       |                                                                                                                                                                                                                                                                                                                                                                                                                                                                                                                                                       | Phase 2         | 56  | Jan-97     | 4-Mar-08  |
| IFN-α | NCT00003585 | Biological Therapy Plus Chemotherapy in Treating Patients With Metastatic or Recurrent Kidney                                        | Completed | Kidney Cancer                                                                                      | Biological: aldesleukin Biological: recombinant interferon alfa Drug: fluorouracil Drug: isotretinoin Procedure:                                                                                                                                                                                                                                                                      |                                                                                                                                                                                                                                                                                                                                                                                                                                                                                                                                                       | Phase 1 Phase 2 | 35  | Aug-96     | 10-Dec-13 |
| IFN-α | NCT00002829 | Bone Marrow Transplantation in Treating Patients With Lymphoma                                                                       | Completed | Lymphoma                                                                                           | Biological: Recombinant Interferon Alfa Drug: Cyclophosphamide Drug: Etoposide Drug: Mesna Procedure: Bone Marrow Transplantation Radiation:                                                                                                                                                                                                                                          | Number of Patients with Response                                                                                                                                                                                                                                                                                                                                                                                                                                                                                                                      | Phase 2         | 45  | Feb-94     | 30-Jul-12 |
| IFN-α | NCT00577993 | Fludarabine, Mitoxantrone, and Dexamethasone (FND) Plus Rituximab for Lymphoma Patients                                              | Completed | Lymphoma                                                                                           | Drug: Fludarabine Drug: Novantrone Drug: Decadron Drug: Rituximab Drug: Interferon Drug: Doxorubicin Drug: Vincristine Drug: Bleomycin Drug: Cyclophosphamide Drug: Etoposide Drug: Cisplatin Drug: Ara-C Drug: Methyl-Prednisolone Drug: Procarbazine Drug:                                                                                                                          | To study and compare molecular response rates with the FND regimen followed by rituximab (chimeric anti-CD20 antibody) and interferon versus FND plus rituximab concurrently, followed by interferon To study the toxicity of these two regimens, including their effects on B- and T- cell subsets, immunoglobulins, and patterns of infections. Compare failure-free and overall survival rates To identify and treat with a separate strategy those follicular lymphoma patients without bcl-2 mbr or mcr gene rearrangement ("germline" patients) | Phase 3         | 210 | 16-Mar-98  | 15-Jul-19 |
| IFN-α | NCT01964300 | Peginterferon Alfa-2b in Treating Younger Patients With Craniopharyngioma That is Recurrent or Cannot Be Removed By                  | Completed | Childhood Craniopharyngioma                                                                        | Biological: peginterferon alfa-2b Other: laboratory biomarker analysis                                                                                                                                                                                                                                                                                                                | Rate of disease stabilization for 1 year (i.e. 9 courses of treatment) (Stratum 1) Sustained objective response (PR+CR) rate in the cystic and/or soft tissue component observed during the first year of treatment (Stratum 2) Sustained objective response rate (Stratum 1) Progression-free survival                                                                                                                                                                                                                                               | Phase 2         | 52  | Sep-13     | 21-Feb-19 |
| IFN-α | NCT00524498 | A Phase II Study of a Continuous Hepatic Arterial Infusion Combination Therapy With OPC-18 and 5-FU in Patients With Highly Advanced | Completed | Hepatocellular Carcinoma                                                                           | Drug: OPC-18 Drug: cisplatin                                                                                                                                                                                                                                                                                                                                                          | Antitumor effect (tumor size reduction) Disease control rate Overall survival Progression-free survival                                                                                                                                                                                                                                                                                                                                                                                                                                               | Phase 2         | 60  | Sep-07     | 15-Oct-15 |
| IFN-α | NCT0002475  | Cyclophosphamide Plus Vaccine Therapy in Treating Patients With Advanced Cancer                                                      | Completed | Breast Cancer Colorectal Cancer Kidney Cancer Lung Cancer Malignant Mesothelioma Pancreatic Cancer | Biological: allogeneic tumor cell vaccine Biological: autologous tumor cell vaccine Biological: recombinant interferon alfa Biological: recombinant interferon gamma Biological: sargramostim Drug: cyclophosphamide                                                                                                                                                                  | Clinical response (patients with evaluable disease) Duration of response (patients with evaluable disease) Survival (patients with evaluable disease) Time to recurrence (patients without evaluable disease) Survival (patients without evaluable disease)                                                                                                                                                                                                                                                                                           | Phase 2         | 40  | April 1991 | 10-Jul-13 |

|       |             |                                                                                                                                                                               |           |                                           |                                                                                                                                                                                                                                                                                                                                                                                                                                                                   |                                                                                                                                                                                                                                                   |                 |     |           |           |
|-------|-------------|-------------------------------------------------------------------------------------------------------------------------------------------------------------------------------|-----------|-------------------------------------------|-------------------------------------------------------------------------------------------------------------------------------------------------------------------------------------------------------------------------------------------------------------------------------------------------------------------------------------------------------------------------------------------------------------------------------------------------------------------|---------------------------------------------------------------------------------------------------------------------------------------------------------------------------------------------------------------------------------------------------|-----------------|-----|-----------|-----------|
| IFN-α | NCT0005847  | Chemotherapy With or Without Biological Therapy in Treating Patients With Metastatic Prostate Cancer That Has Not Responded to Hormone Therapy                                | Completed | Prostate Cancer                           | Biological: recombinant interferon alfa[Drug: estramustine phosphate sodium][Drug: isotretinoin][Drug: mitoxantrone hydrochloride][Drug: paclitaxel][Drug: vinorelbine ditartrate                                                                                                                                                                                                                                                                                 |                                                                                                                                                                                                                                                   | Phase 2         |     | Jan-01    | 27-Jan-10 |
| IFN-α | NCT0007995  | Chemotherapy Plus Peripheral Stem Cell Transplant in Treating Patients Who Have Multiple Myeloma or Primary Systemic Amyloidosis                                              | Completed | Multiple Myeloma and Plasma Cell Neoplasm | Biological: filgrastim[Biological: recombinant interferon alfa][Biological: sargramostim][Drug: busulfan][Drug: cyclophosphamide][Drug: melphalan][Procedure: autologous bone marrow transplantation][Procedure: bone marrow ablation with stem cell                                                                                                                                                                                                              | Disease-free survival at 2 years (patients with responsive disease) Duration of hematologic toxicity Time to an absolute neutrophil count Platelet independence                                                                                   | Phase 2         | 75  | Jul-99    | 4-Feb-13  |
| IFN-α | NCT0004905  | Combination Chemotherapy Plus Peripheral Stem Cell Transplantation in Treating Patients With Chronic Myelogenous Leukemia or Acute Leukemia                                   | Completed | Leukemia                                  | Biological: filgrastim[Biological: recombinant interferon alfa][Drug: cyclophosphamide][Drug: cytarabine][Drug: etoposide][Drug: idarubicin][Procedure: peripheral blood stem cell                                                                                                                                                                                                                                                                                |                                                                                                                                                                                                                                                   | Phase 2         |     | Oct-99    | 30-May-13 |
| IFN-α | NCT00110058 | Fludarabine and Radiation Therapy in Treating Patients Who Are Undergoing Donor Stem Cell Transplant for Chronic Phase or Accelerated Phase Chronic Myelogenous Leukemia      | Completed | Leukemia                                  | Biological: recombinant interferon alfa[Biological: therapeutic allogeneic lymphocytes][Drug: cyclosporine][Drug: fludarabine phosphate][Drug: imatinib mesylate][Drug: mycophenolate mofetil][Procedure: peripheral blood stem                                                                                                                                                                                                                                   | Progression-free survival Rate of complete molecular response Late nonrelapse mortality Incidence and severity of graft-vs-host disease (GVHD) Incidence of serious infections Myelosuppression Overall survival and disease-free survival        | Phase 2         | 40  | Feb-05    | 17-Nov-11 |
| IFN-α | NCT00003727 | Chemotherapy and Peripheral Stem Cell Transplantation Followed by Immunotherapy in Treating Patients With Chronic Myelogenous Leukemia                                        | Completed | Leukemia                                  | Biological: filgrastim[Biological: recombinant interferon alfa][Biological: sargramostim][Biological: therapeutic autologous lymphocytes][Drug: carmustine][Drug: cyclophosphamide][Drug: etoposide][Drug: gemcitabine hydrochloride][Drug: melphalan][Procedure: bone marrow ablation with stem cell                                                                                                                                                             | Response (i.e., major cytogenetic or molecular response) within 12 months after completion of study therapy Mortality rate                                                                                                                        | Phase 2         | 22  | Mar-99    | 4-Nov-19  |
| IFN-α | NCT00002835 | Combination Chemotherapy in Treating Patients With Lymphoma                                                                                                                   | Completed | Lymphoma                                  | Biological: Bleomycin Sulfate (BLM) Biological: Filgrastim (G-CSF) Biological: Recombinant Interferon Alfa[Drug: Carmustine][Drug: Cisplatin (CDDP)][Drug: Cyclophosphamide][Drug: Cytarabine (ARA-C)][Drug: Etoposide (VP-16)][Drug: Idarubicin][Drug: Ifosfamide][Drug: Leucovorin Calcium][Drug: Melphalan][Drug: Methotrexate][Drug: Methylprednisolone][Drug: mitoxantrone hydrochloride (DHAD)][Drug: Vincristine Sulfate][Procedure: Peripheral Blood Stem | Efficacy of Early Intensification vs. Alternating Triple Chemotherapy                                                                                                                                                                             | Phase 3         | 116 | 30-Oct-95 | 15-Nov-18 |
| IFN-α | NCT00004231 | Combination Chemotherapy, Bone Marrow or Peripheral Stem Cell Transplantation, and/or Biological Therapy in Treating Patients With Stage III or Stage IV Mantle Cell Lymphoma | Completed | Lymphoma                                  | Biological: aldesieukin[Biological: filgrastim][Biological: recombinant interferon alfa][Drug: busulfan][Drug: cyclophosphamide][Drug: cytarabine][Drug: doxorubicin hydrochloride][Drug: leucovorin calcium][Drug: methotrexate][Drug: prednisone][Drug: teniposide][Drug: vincristine sulfate][Procedure: allogeneic bone marrow transplantation][Procedure: autologous bone marrow                                                                             |                                                                                                                                                                                                                                                   | Phase 2         |     | Oct-99    | 6-Jun-12  |
| IFN-α | NCT00623402 | Combined Treatment of Sorafenib and Pegylated Interferon α 2b in Stage IV Metastatic Melanoma                                                                                 | Completed | Melanoma                                  | Drug: Sorafenib[Drug: pegylated interferon α-2b                                                                                                                                                                                                                                                                                                                                                                                                                   | disease control rate (CR,PR,SD) Best response Progression free survival (PFS) Overall survival Safety and tolerability of the combined treatment                                                                                                  | Phase 2         | 55  | Jan-08    | 12-Jan-11 |
| IFN-α | NCT01731158 | Sequential Therapy in Metastatic Renal Cell Carinoma                                                                                                                          | Completed | Metastatic Renal Cell Carcinoma           | Drug: Avastin in combination with Roferon-A[Drug: Afinitor][Drug: TKI: Sutent, Nexavar or Votrient                                                                                                                                                                                                                                                                                                                                                                | PFS rate of 2nd line treatment at 6 months after randomisation PFS for 2nd line treatment PFS for each treatment given Overall Survival number and severity (CTCAE 4.0) adverse events changes in quality of life throughout the Trial using FKSI | Phase 2         | 22  | Oct-12    | 6-Feb-19  |
| IFN-α | NCT00560053 | Pethema Multiple Myeloma 2000                                                                                                                                                 | Completed | Multiple Myeloma                          | Drug: Alternating chemotherapy Procedure: Autologous Transplantation[Drug: Maintenance][Procedure: Second transplantation][Procedure: ALOGENIC MINI TRASPLANTATION                                                                                                                                                                                                                                                                                                |                                                                                                                                                                                                                                                   | Phase 3         | 500 | Jan-00    | 27-Nov-08 |
| IFN-α | NCT01513187 | Pazopanib in Combination With Interferon Alfa 2-A, in Patients With Advanced Renal Cell Carcinoma                                                                             | Completed | Advanced Renal Cell Carcinoma             | Drug: Pazopanib + interferon alpha 2A                                                                                                                                                                                                                                                                                                                                                                                                                             | Maximum tolerated dose (MTD) - Phase I Efficacy, response rate (Phase II) Progression free survival Overall Survival Frequency of adverse events Translational Substudy                                                                           | Phase 1 Phase 2 | 53  | 11-Jul-11 | 17-Mar-20 |

|       |             |                                                                                                                                   |           |                                                                                    |                                                                                                       |                                                                                                                                                                                                                                                                                                                                                                                                                                                                                                                                                                                                                                                                                                                                                                                                                                                                                                                                                                           |                 |    |            |           |
|-------|-------------|-----------------------------------------------------------------------------------------------------------------------------------|-----------|------------------------------------------------------------------------------------|-------------------------------------------------------------------------------------------------------|---------------------------------------------------------------------------------------------------------------------------------------------------------------------------------------------------------------------------------------------------------------------------------------------------------------------------------------------------------------------------------------------------------------------------------------------------------------------------------------------------------------------------------------------------------------------------------------------------------------------------------------------------------------------------------------------------------------------------------------------------------------------------------------------------------------------------------------------------------------------------------------------------------------------------------------------------------------------------|-----------------|----|------------|-----------|
| IFN-α | NCT01872442 | Combination of Dasatinib and Peg-Interferon Alpha 2b in First Line for Chronic Myeloid Leukemia in Chronic                        | Completed | Chronic Phase of Chronic Myeloid Leukemia                                          | Drug: Dasatinib Drug: Peg-Interferon alpha2b                                                          | Cumulative rate of molecular response Rate of complete cytogenetic response Rate of major molecular responses Rate of molecular response Kinetics and duration Rate of PegIFN-α2b and dasatinib discontinuation                                                                                                                                                                                                                                                                                                                                                                                                                                                                                                                                                                                                                                                                                                                                                           | Phase 2         |    | 15-Oct-13  | 17-Mar-20 |
| IFN-β | NCT00085306 | Interferon Beta in Treating Patients With Metastatic Cutaneous Melanoma or Ocular Melanoma                                        | Completed | Stage IV Melanoma Recurrent Melanoma                                               | Biological: recombinant interferon beta                                                               | Objective clinical response rate to IFN-B the maximum tolerated dose as measured by a CTC Grade III hematologic or a Grade IV granulocyte toxicity which persists > 3 days at 1 week after each course                                                                                                                                                                                                                                                                                                                                                                                                                                                                                                                                                                                                                                                                                                                                                                    | Phase 2         | 21 | April 2004 | 2-Oct-15  |
| IFN-β | NCT00000695 | Open Label Phase I Study To Evaluate the Safety of Combination Therapy With AZT and Interferon-Beta in Patients With AIDS Related | Completed | Sarcoma, Kaposi HIV Infections                                                     | Drug: Interferon beta-1b Drug: Zidovudine                                                             |                                                                                                                                                                                                                                                                                                                                                                                                                                                                                                                                                                                                                                                                                                                                                                                                                                                                                                                                                                           | Phase 1         | 36 |            | 23-May-12 |
| IFN-β | NCT02530047 | Mesenchymal Stem Cells (MSC) for Ovarian Cancer                                                                                   | Completed | Ovarian Cancer                                                                     | Genetic: MSC-INF 尾  Behavioral: Questionnaires                                                        | Maximum Tolerated Dose (MTD) of Mesenchymal Stem Cells-Interferon-尾 (MSC-INF 尾) Correlation Between the Number of MSC-INF 尾 Infused and the Production of Interferon-尾 and the Number of MSC-INF 尾 Detected at the Tumor Sites Via Tumor                                                                                                                                                                                                                                                                                                                                                                                                                                                                                                                                                                                                                                                                                                                                  | Phase 1         | 5  | 16-May-16  | 18-Jul-19 |
| IFN-β | NCT00107861 | Interferon-Beta Gene Transfer (Ad.hIFN-尾) as Treatment for Refractory Colorectal Carcinoma With Liver Metastases                  | Completed | Colorectal Carcinoma Metastases                                                    | Drug: Ad.hIFN-尾 (BG00001, IDEC-201)                                                                   | - Evaluate the safety of a single IV administration of Ad.hIFN-尾. Evaluate the MTD or maximum feasible dose (MFD) of Ad.hIFN-尾. Evaluate IFN-尾 and Ad.hIFN-尾 vector serum concentrations. Evaluate immunogenicity of Ad.hIFN-尾 by measuring human anti adenovirus and human anti-IFN-尾 antibody formation. Explore preliminary clinical activity.                                                                                                                                                                                                                                                                                                                                                                                                                                                                                                                                                                                                                         | Phase 1 Phase 2 | 44 | May-05     | 14-Jul-09 |
| IFN-β | NCT00031083 | Dose Escalation Study to Determine the Safety of IFN-Beta Gene Transfer in the Treatment of Grade III & Grade                     | Completed | Glioblastoma Multiforme Anaplastic Astrocytoma Oligoastrocytoma, Mixed Gliosarcoma | Genetic: Interferon-beta                                                                              |                                                                                                                                                                                                                                                                                                                                                                                                                                                                                                                                                                                                                                                                                                                                                                                                                                                                                                                                                                           | Phase 1         | 12 | 2-Apr-02   | 17-Nov-20 |
| IFN-β | NCT00299962 | Gene Therapy for Pleural Malignancies                                                                                             | Completed | Pleural Mesothelioma Metastatic Pleural Effusions                                  | Biological: Adenoviral-mediated Interferon-beta Biological: SCH 721015                                | To determine toxicity of two doses of intrapleural BG00001 (Ad.hIFN-β over 8 days, and) To assess systemic and intrapleural cytokine responses as well as cellular and humoral immune responses after repeated BG00001 instillation, and to assess, in a preliminary way, efficacy via tumor regression, time to progression and survival.                                                                                                                                                                                                                                                                                                                                                                                                                                                                                                                                                                                                                                | Phase 1         | 17 | Mar-06     | 18-Mar-20 |
| IFN-β | NCT00066404 | Intrapleural BG00001 in Treating Patients With Malignant Pleural Mesothelioma or Malignant Pleural                                | Completed | Cancer                                                                             | Biological: recombinant adenovirus-hIFN-beta                                                          |                                                                                                                                                                                                                                                                                                                                                                                                                                                                                                                                                                                                                                                                                                                                                                                                                                                                                                                                                                           | Phase 1         |    | Apr-03     | 13-May-20 |
| IFN-γ | NCT00786643 | Study of Gamma Interferon in Metastatic Colorectal Carcinoma                                                                      | Completed | Colorectal Cancer                                                                  | Drug: 5-Fluorouracil Drug: Leucovorin (LV) Drug: Gamma-Interferon-1b (IFN-                            | Best Response (BR) Early Response Rate (RR) (Stratum 1 Only) Time to Progression                                                                                                                                                                                                                                                                                                                                                                                                                                                                                                                                                                                                                                                                                                                                                                                                                                                                                          | Phase 2         | 48 | Feb-06     | 1-Mar-12  |
| IFN-γ | NCT00501644 | Chemioimmunotherapy Study for Patients With Epithelial Ovarian                                                                    | Completed | Ovarian Cancer Fallopian Tube Cancer Peritoneal Cancer                             | Drug: Carboplatin Drug: GM-CSF (Sargramostim) Drug: Interferon Gamma                                  | Number of Patients With Response                                                                                                                                                                                                                                                                                                                                                                                                                                                                                                                                                                                                                                                                                                                                                                                                                                                                                                                                          | Phase 2         | 59 | Jan-03     | 7-Aug-12  |
| IFN-γ | NCT02197169 | DNX-2401 With Interferon Gamma (IFN-γ) for Recurrent Glioblastoma or Gliosarcoma Brain Tumors                                     | Completed | Glioblastoma or Gliosarcoma                                                        | Drug: Single intratumoral injection of DNX-2401 Drug: Interferon-gamma                                | Objective response rate (ORR) determined by MRI scan review Incidence and severity of adverse events, including changes in laboratory test results and neurological examination findings Number of subjects with immunological and biological effects after DNX-2401 with Interferon gamma Changes in steroid use (dose and frequency) and clinical and KPS status overall and per study arm assignment Overall survival (OS), progression-free survival (PFS), and clinical benefit rate (CBR). Changes in responses to quality of life                                                                                                                                                                                                                                                                                                                                                                                                                                  | Phase 1         | 37 | 11-Sep-14  | 16-Jul-18 |
| IFN-γ | NCT02614456 | Combination of Interferon-gamma and Nivolumab for Advanced Solid Tumors                                                           | Completed | Advanced Solid Tumors                                                              | Drug: interferon-gamma and nivolumab                                                                  | Number of participants with treatment-related adverse events as assessed by CTCAE version 4.03. Determine the recommended phase 2 dose (RP2D) based on Dose limiting toxicities To evaluate the investigator assessed ORR using standard response evaluation criteria in solid tumors (RECIST) version 1.1 for metastatic renal cell carcinoma. To evaluate the investigator assessed ORR using standard response evaluation criteria in solid tumors (RECIST) version 1.1 for metastatic urothelial cancer. To evaluate median progression free survival (PFS) using Kaplan-Meier curves for metastatic renal cell carcinoma. To evaluate median progression free survival (PFS) using Kaplan-Meier curves for metastatic urothelial cancer. To evaluate median overall survival (OS) using Kaplan-Meier curves for metastatic renal cell carcinoma. To evaluate median overall survival (OS) using Kaplan-Meier curves for metastatic urothelial cancer. To investigate | Phase 1         | 26 | 11-Dec-15  | 29-Nov-19 |
| IFN-γ | NCT00004032 | Tumor Vaccine and Interferon Gamma in Treating Patients With Refractory Epithelial Ovarian Cancer                                 | Completed | Recurrent Ovarian Epithelial Cancer                                                | Biological: ALVAC-hB7.1 Biological: recombinant interferon gamma Other: laboratory biomarker analysis | Autologous tumor cell cytotoxicity lymphocyte (CTL) Cytokine production (IFN gamma, IL-10, IL-2) by RT-PCR Toxicity as assessed by NCI Common Terminology Criteria (CTC)                                                                                                                                                                                                                                                                                                                                                                                                                                                                                                                                                                                                                                                                                                                                                                                                  | Phase 1         | 12 | Oct-97     | 23-Jan-13 |
| IFN-γ | NCT00004032 | Tumor Vaccine and Interferon Gamma in Treating Patients With Refractory Epithelial Ovarian Cancer                                 | Completed | Recurrent Ovarian Epithelial Cancer                                                | Biological: ALVAC-hB7.1 Biological: recombinant interferon gamma Other: laboratory biomarker analysis | Autologous tumor cell cytotoxicity lymphocyte (CTL) Cytokine production (IFN gamma, IL-10, IL-2) by RT-PCR Toxicity as assessed by NCI Common Terminology Criteria (CTC)                                                                                                                                                                                                                                                                                                                                                                                                                                                                                                                                                                                                                                                                                                                                                                                                  | Phase 1         | 12 | Oct-97     | 23-Jan-13 |
| IFN-γ | NCT00394693 | Study to Evaluate the Safety and Efficacy of Adeno-IFN Gamma in Cutaneous B-cell Lymphoma                                         | Completed | Lymphoma, B-Cell                                                                   | Genetic: Adenovirus Interferon gamma                                                                  | Regression and disappearance of lesions Safety Quality of Life                                                                                                                                                                                                                                                                                                                                                                                                                                                                                                                                                                                                                                                                                                                                                                                                                                                                                                            | Phase 2         | 13 | Nov-06     | 16-Jul-14 |
| IFN-γ | NCT00394693 | Study to Evaluate the Safety and Efficacy of Adeno-IFN Gamma in Cutaneous B-cell Lymphoma                                         | Completed | Lymphoma, B-Cell                                                                   | Genetic: Adenovirus Interferon gamma                                                                  | Regression and disappearance of lesions Safety Quality of Life                                                                                                                                                                                                                                                                                                                                                                                                                                                                                                                                                                                                                                                                                                                                                                                                                                                                                                            | Phase 2         | 13 | Nov-06     | 16-Jul-14 |
| IFN-γ | NCT00004016 | Interferon Gamma in Treating Patients With Recurrent or Metastatic Melanoma or Other Solid Tumors                                 | Completed | Melanoma (Skin) Unspecified Adult Solid Tumor, Protocol Specific                   | Biological: recombinant interferon gamma                                                              |                                                                                                                                                                                                                                                                                                                                                                                                                                                                                                                                                                                                                                                                                                                                                                                                                                                                                                                                                                           | Phase 1         |    | April 1999 | 6-Jun-13  |
| IFN-γ | NCT00004016 | Interferon Gamma in Treating Patients With Recurrent or Metastatic Melanoma or Other Solid Tumors                                 | Completed | Melanoma (Skin) Unspecified Adult Solid Tumor, Protocol Specific                   | Biological: recombinant interferon gamma                                                              |                                                                                                                                                                                                                                                                                                                                                                                                                                                                                                                                                                                                                                                                                                                                                                                                                                                                                                                                                                           | Phase 1         |    | April 1999 | 6-Jun-13  |

|       |              |                                                                                                                                                                                                                                |           |                                                                                                    |                                                                                                                                                                                                                                                                                                                                             |                                                                                                                                                                                                                                                                                                                                    |                 |     |            |           |
|-------|--------------|--------------------------------------------------------------------------------------------------------------------------------------------------------------------------------------------------------------------------------|-----------|----------------------------------------------------------------------------------------------------|---------------------------------------------------------------------------------------------------------------------------------------------------------------------------------------------------------------------------------------------------------------------------------------------------------------------------------------------|------------------------------------------------------------------------------------------------------------------------------------------------------------------------------------------------------------------------------------------------------------------------------------------------------------------------------------|-----------------|-----|------------|-----------|
| IFN-γ | NCT00001296  | A Randomized Phase III Trial of Hyperthermic Isolated Limb Perfusion With Melphalan, Tumor Necrosis Factor, and Interferon-Gamma in Patients With Locally Advanced                                                             | Completed | Melanoma                                                                                           | Drug: melphalan Drug: tumor necrosis factor Drug: interferon-gamma Procedure: hyperthermic isolated limb perfusion                                                                                                                                                                                                                          |                                                                                                                                                                                                                                                                                                                                    | Phase 3         | 122 | Feb-92     | 4-Mar-08  |
| IFN-γ | NCT00002637  | Biological Therapy in Treating Patients With Prostate Cancer                                                                                                                                                                   | Completed | Prostate Cancer                                                                                    | Biological: aldesleukin Biological: gene-modified tumor cell vaccine therapy Biological: recombinant interferon                                                                                                                                                                                                                             |                                                                                                                                                                                                                                                                                                                                    | Phase 1 Phase 2 | 25  | Jan-95     | 25-Jun-13 |
| IFN-γ | NCT000070187 | Immunotherapy Using Cyclosporine, Interferon Gamma, and Interleukin-2 After High-Dose Myeloablative Chemotherapy With Autologous Stem Cell Transplantation in Treating Patients With Refractory or Relapsed Hodgkin's Lymphoma | Completed | Lymphoma                                                                                           | Biological: aldesleukin Biological: filgrastim Biological: recombinant interferon gamma Drug: carmustine Drug: cyclosporine Drug: cytarabine Drug: etoposide Drug: melphalan Procedure: autologous bone marrow transplantation Procedure: bone marrow ablation with stem cell support Procedure: peripheral blood stem cell transplantation | Incidence of death, excluding death due to disease, during the period of time from day 0 (transplant) through day 100 post transplant                                                                                                                                                                                              | Phase 2 Phase 3 | 24  | Nov-03     | 17-Oct-13 |
| IFN-γ | NCT000616720 | Interferon-gamma or Aldesleukin and Vaccine Therapy in Treating Patients With Multiple Myeloma                                                                                                                                 | Completed | Multiple Myeloma and Plasma Cell Neoplasm                                                          | Biological: aldesleukin Biological: idiotype-pulsed autologous dendritic cell vaccine APC8020 Biological: recombinant interferon gamma Genetic: reverse transcriptase-polymerase chain reaction Other: flow cytometry Other: laboratory biomarker                                                                                           | Confirmed response (i.e., clinical or immunological)                                                                                                                                                                                                                                                                               | Phase 2         | 15  | Aug-01     | 16-May-11 |
| IFN-γ | NCT00002505  | Tumor Cell Vaccine in Treating Patients With Advanced Cancer                                                                                                                                                                   | Completed | Unspecified Adult Solid Tumor, Protocol Specific                                                   | Biological: filgrastim Biological: recombinant interferon gamma Biological: tumor cell lysate vaccine therapy                                                                                                                                                                                                                               |                                                                                                                                                                                                                                                                                                                                    | Phase 2         |     | Aug-92     | 12-May-11 |
| IFN-γ | NCT00002475  | Cyclophosphamide Plus Vaccine Therapy in Treating Patients With Advanced Cancer                                                                                                                                                | Completed | Breast Cancer Colorectal Cancer Kidney Cancer Lung Cancer Malignant Mesothelioma Pancreatic Cancer | Biological: allogeneic tumor cell vaccine Biological: autologous tumor cell vaccine Biological: recombinant interferon alfa Biological: recombinant interferon gamma Biological: sargramostim Drug: cyclophosphamide                                                                                                                        | Clinical response (patients with evaluable disease) Duration of response (patients with evaluable disease) Survival (patients with evaluable disease) Time to recurrence (patients without evaluable disease) Survival (patients without evaluable disease)                                                                        | Phase 2         | 40  | April 1991 | 10-Jul-13 |
| IFN-γ | NCT00008203  | Comparison of Biological Therapies Following Combination Chemotherapy and Bone Marrow or Peripheral Stem Cell Transplantation in Women With Stage II or Stage III Breast Cancer                                                | Completed | Breast Cancer                                                                                      | Biological: aldesleukin Biological: recombinant interferon gamma Drug: carboplatin Drug: cyclophosphamide Drug: cyclosporine Drug: thiotepa Procedure: autologous bone marrow transplantation Procedure: peripheral blood                                                                                                                   |                                                                                                                                                                                                                                                                                                                                    | Phase 3         |     | May-96     | 4-Feb-13  |
| IFN-γ | NCT00003414  | Graft-Versus-Host Disease in Treating Patients With Recurrent or Refractory Lymphoma or Hodgkin's Disease                                                                                                                      | Completed | Graft Versus Host Disease Lymphoma                                                                 | Biological: aldesleukin Biological: recombinant interferon gamma Drug: busulfan Drug: cyclophosphamide Drug: cyclosporine Procedure: peripheral blood stem cell transplantation Radiation:                                                                                                                                                  | Relapse rate for lymphoma after autologous transplant                                                                                                                                                                                                                                                                              | Phase 3         | 50  | Oct-97     | 20-Jul-15 |
| IFN-γ | NCT00008203  | Comparison of Biological Therapies Following Combination Chemotherapy and Bone Marrow or Peripheral Stem Cell Transplantation in Women With Stage II or Stage III Breast Cancer                                                | Completed | Breast Cancer                                                                                      | Biological: aldesleukin Biological: recombinant interferon gamma Drug: carboplatin Drug: cyclophosphamide Drug: cyclosporine Drug: thiotepa Procedure: autologous bone marrow transplantation Procedure: peripheral blood                                                                                                                   |                                                                                                                                                                                                                                                                                                                                    | Phase 3         |     | May-96     | 4-Feb-13  |
| IFN-γ | NCT00250678  | A Study of the Efficacy and Safety of ASN-002 in Adult Patients With Low-risk Nodular Basal Cell Carcinoma                                                                                                                     | Completed | Basal Cell Nevus Syndrome Skin Neoplasm Nodular Basal Cell Carcinoma of Skin                       | Biological: ASN-002 Drug: 5-FU                                                                                                                                                                                                                                                                                                              | Incidences of ASN 002 related Adverse Event in patients with previously untreated nBCC Microscopic clearance of the injected basal cell carcinoma. Clinical Changes in size of nBCC tumor over time after treatment with ASN-002 alone or in combination with 5-FU                                                                 | Phase 1 Phase 2 | 16  | Sep-15     | 6-Jun-18  |
| IFN-γ | NCT002380443 | AlloStim <sup>IP</sup> Immunotherapy Dosing Alone or in Combination With Cryoablation in Metastatic Colorectal Cancer                                                                                                          | Completed | Colorectal Cancer Metastatic                                                                       | Biological: AlloStim Procedure: Cryoablation                                                                                                                                                                                                                                                                                                | To determine the safety of increased frequency of dosing (Part 1) (whether a Dose Limiting Toxicity (DLT) has occurred) To evaluate the anti-tumor effect of AlloStim combined with cryoablation at the new proposed dose and frequency schedule (Part 2) To assess change from baseline in Health-Related Quality of Life (HRQoL) | Phase 2         | 12  | Sep-16     | 22-Jan-20 |
| IFN-γ | NCT002948426 | Intraperitoneal Infusion of Autologous Monocytes With Sylatron (Peginterferon Alfa-2b) and Actimmune (Interferon Gamma-1b) in Women With Recurrent or Refractory Ovarian Cancer, Fallopian Tube                                | Completed | Fallopian Tube Cancer Ovarian Cancer Primary Peritoneal Cancer                                     | Biological: Autologous Monocytes + ACTIMMUNE + SYLATRON                                                                                                                                                                                                                                                                                     | Maximum Tolerated Dose of intraperitoneal autologous monocytes and Sylatron (Peginterferon alpha-2b) and Actimmune (Interferon gamma-1b).                                                                                                                                                                                          | Phase 1         | 18  | 8-Feb-17   | 1-Oct-20  |

|       |             |                                                                                                                                                                        |            |                                                                                                                                      |                                                                                                                                                                            |                                                                                                                                                                                                                                                                                                                                                                                                                                                                                                                                                                                                                                                                                                                                          |                |     |            |                |
|-------|-------------|------------------------------------------------------------------------------------------------------------------------------------------------------------------------|------------|--------------------------------------------------------------------------------------------------------------------------------------|----------------------------------------------------------------------------------------------------------------------------------------------------------------------------|------------------------------------------------------------------------------------------------------------------------------------------------------------------------------------------------------------------------------------------------------------------------------------------------------------------------------------------------------------------------------------------------------------------------------------------------------------------------------------------------------------------------------------------------------------------------------------------------------------------------------------------------------------------------------------------------------------------------------------------|----------------|-----|------------|----------------|
| IL-1  | NCT00635154 | Anakinra With or Without Dexamethasone in Treating Patients With Smoldering or Indolent Multiple Myeloma                                                               | Completed  | Multiple Myeloma and Plasma Cell Neoplasm                                                                                            | Biological: Anakinra (IL-1Ra) Drug: Dexamethasone acetate                                                                                                                  | Patients With Confirmed Response (Complete Response, Very Good Partial Response, Partial Response, or Minimal Response) on 2 Consecutive Months During the First 6 Months of Treatment With Anakinra Alone Number of Patients With Response to Treatment With Dexamethasone and Anakinra Number of Patients Who Are Progression-free and Alive at 6 Months Number of Patients With Severe Non-hematological Adverse Events in Patients Receiving Anakinra Alone or in Combination With Dexamethasone Progression Free Survival (PFS) in Patients Treated With Anakinra Alone or in Combination With Dexamethasone Number of Patients With Severe Non-hematological Adverse Events in Participants Receiving Anakinra in Combination With | Phase 2        | 55  | Dec-02     | 7-Jun-18       |
| IL-1  | NCT00629486 | Genetic Polymorphisms of Interleukin-1B and TNF-A and HBV-Related Hepatocellular Carcinoma                                                                             | Completed  | Hepatitis B Hepatocellular Carcinoma Chronic Liver Disease                                                                           | Genetic: Polymorphism of IL-1 beta and TNF-alpha                                                                                                                           | cytokine polymorphisms increase risk for hepatocellular carcinoma                                                                                                                                                                                                                                                                                                                                                                                                                                                                                                                                                                                                                                                                        | Not Applicable | 300 | Jan-07     | April 18, 2013 |
| IL-1  | NCT00001270 | Feasibility Study of Interleukin 1-Alpha With Ifosfamide, CBDCA, and Etoposide With Autologous Bone Marrow Transplant in Metastatic                                    | Completed  | Breast Neoplasms Lymphoma Neoplasm Metastasis Testicular Neoplasms                                                                   | Drug: interleukin-1                                                                                                                                                        |                                                                                                                                                                                                                                                                                                                                                                                                                                                                                                                                                                                                                                                                                                                                          | Phase 1        | 85  | Jun-91     | 4-Mar-08       |
| IL-1  | NCT00072111 | Anakinra in Treating Patients With Metastatic Cancer Expressing the Interleukin-1 Gene                                                                                 | Completed  | Unspecified Adult Solid Tumor, Protocol Specific                                                                                     | Biological: anakinra                                                                                                                                                       |                                                                                                                                                                                                                                                                                                                                                                                                                                                                                                                                                                                                                                                                                                                                          | Phase 1        |     | Sep-03     | April 30, 2015 |
| IL-1  | NCT02090101 | Study Evaluating the Influence of LV5FU2 Bevacizumab Plus Anakinra Association on Metastatic Colorectal                                                                | Completed  | Metastatic Colorectal Cancer                                                                                                         | Drug: ANAKINRA                                                                                                                                                             | Response rate after 2 months in patients with colorectal cancer with liver metastases treated with anakinra and LV5FU2/bevacizumab Response rate by echography Tumor control rate Overall survival Rate and safety profile according to NCI-CTCAE v4                                                                                                                                                                                                                                                                                                                                                                                                                                                                                     | Phase 2        | 32  | 10-Oct-14  | 9-Aug-18       |
| IL-1  | NCT02492750 | Lenalidomide and Dexamethasone With or Without Anakinra in Treating Patients With Early Stage Multiple Myeloma                                                         | Completed  | Indolent Plasma Cell Myeloma Plasma Cell Myeloma Smoldering Plasma Cell Myeloma                                                      | Biological: Anakinra Drug: Dexamethasone Other: Laboratory Biomarker Analysis Drug: Lenalidomide Other: Placebo                                                            | Incidence of adverse events, graded according to NCI CTCAE version 4.0 Incidence of toxicity graded according to Common Toxicity Criteria MTD of lenalidomide, dexamethasone, and anakinra defined as the dose level below the lowest dose that induces dose-limiting toxicity in at least one-third of patients (at least 2 of a maximum of 6 new patients) (Phase I) Response profile (Phase I) Time to disease progression (TTP)                                                                                                                                                                                                                                                                                                      | Phase 1        | 14  | April 2016 | 16-Sep-19      |
| IL-1  | NCT01802970 | Safety and Blood Immune Cell Study of Anakinra Plus Physician's Chemotherapy Choice in Metastatic Breast Cancer Patients                                               | Completed  | Metastatic Breast Cancer                                                                                                             | Drug: Anakinra plus Standard of Care                                                                                                                                       | Safety - Adverse Events in participants To determine investigator-assessed objective response rate, clinical benefit rate, progression-free survival, and rates of chemotherapy or cancer-related anemia (Hgb<10), and an anakinra-induced anti-IL-1 blood transcriptional signatures                                                                                                                                                                                                                                                                                                                                                                                                                                                    | Phase 1        | 10  | Dec-12     | 23-Oct-20      |
| IL-1  | NCT03233776 | Anakinra: Safety and Efficacy in the Management of Fever During Neutropenia and Mucositis in ASCT                                                                      | Completed  | Multiple Myeloma                                                                                                                     | Drug: Anakinra                                                                                                                                                             | Establish the maximum tolerated dose of anakinra (MTD, 100, 200 or 300 mg) Incidence of fever during neutropenia Incidence of mucositis-related fever Daily mean CRP level Intestinal mucositis as measured by the area-under-the-curve of reciprocal crystalline levels Clinical mucositis as determined by the daily mouth and gut scores Days with fever (>= 38.5° C) Incidence of bloodstream infections i.e. bacteremia Length of hospital stay in days Use of systemic antimicrobial agents (incidence and duration) Use of analgesic drugs (incidence and duration) Use of total parenteral nutrition (TPN) (incidence and                                                                                                        | Phase 2        | 9   | 21-Aug-17  | 24-Nov-20      |
| IL-11 | NCT00493181 | Interleukin 11, Thrombocytopenia, Imatinib in Chronic Myelogenous Leukemia (CML) Patients                                                                              | Completed  | Leukemia Chronic Myelogenous Leukemia Chronic Myeloid Leukemia                                                                       | Drug: Interleukin-11 (IL-11 or Neumega)                                                                                                                                    | Number of Participants With Complete Response                                                                                                                                                                                                                                                                                                                                                                                                                                                                                                                                                                                                                                                                                            | Phase 2        | 8   | Oct-05     | 20-Feb-12      |
| IL-11 | NCT00004157 | Interleukin-11 Plus Filgrastim Prior to Peripheral Stem Cell Transplantation in Patients With Non-Hodgkin's Lymphoma, Hodgkin's Disease, Breast Cancer, or Other Solid | Completed  | Breast Cancer Gestational Trophoblastic Tumor Kidney Cancer Lymphoma Neuroblastoma Ovarian Cancer Sarcoma Testicular Germ Cell Tumor | Biological: filgrastim Biological: recombinant interleukin-11                                                                                                              |                                                                                                                                                                                                                                                                                                                                                                                                                                                                                                                                                                                                                                                                                                                                          | Phase 2        |     | Aug-00     | April 2, 2010  |
| IL-12 | NCT00622401 | Vaccination of Patients With Breast Cancer With Dendritic Cell/Tumor Fusions and IL-12                                                                                 | Terminated | Breast Cancer                                                                                                                        | Biological: Dendritic Cell/Tumor Fusion Vaccine Drug: Interleukin-12                                                                                                       | Number of Participants With Adverse Events Associated With Vaccination of Breast Cancer Patients With Dendritic Cell (DC)/Tumor Fusion Vaccine To Determine if Cellular and Humoral Immunity is Induced by Serial Vaccination With DC/Tumor Fusion Cells and                                                                                                                                                                                                                                                                                                                                                                                                                                                                             | Phase 1        | 8   | Dec-09     | 14-Nov-17      |
| IL-12 | NCT01307618 | Vaccine Therapy With or Without Recombinant Interleukin-12 Followed by Daclizumab in Treating Patients With Metastatic Melanoma                                        | Terminated | Recurrent Melanoma Stage IV Skin Melanoma                                                                                            | Biological: NA17.A2 Peptide Vaccine Biological: Recombinant MAGE-3.1 Antigen Biological: Recombinant Interleukin-12 Biological: MART-1 Antigen Other: Laboratory Biomarker | Frequency of Vaccine-induced CD8+ T Cells Assessed by Enzyme-linked Immunospot (ELISPOT) Absolute Number of CD4+CD25+FoxP3+ Regulatory T Cells From Peripheral Blood Type and Grade of Toxicity Incidents Assessed by Common Toxicity Criteria Version 4.0 (CTCAE v4.0) Progression-free Survival Assessed by Modified World Health Organization (WHO) Criteria Overall Survival Assessed by Modified WHO Criteria Gene                                                                                                                                                                                                                                                                                                                  | Phase 3        | 10  | Feb-11     | 24-Oct-16      |
| IL-12 | NCT01118052 | EGEN-001 in Treating Patients With Persistent or Recurrent Ovarian Epithelial Cancer, Fallopian Tube Cancer, or Primary Peritoneal                                     | Completed  | Fallopian Tube Carcinoma Primary Peritoneal Carcinoma Recurrent Ovarian Carcinoma                                                    | Other: Laboratory Biomarker Analysis Biological: PEG-PEI-cholesterol Lipopolymer-encased IL-12 DNA Plasmid Vector GEN-1                                                    | Patients Who Survive Progression-free for at Least 6 Months Patients Who Have Objective Tumor Response (Complete or Partial Response) Adverse Events Deemed at Least Possibly Related to Treatment, as Assessed by NCI CTCAE Version 4.0 Overall Survival Progression-free Survival                                                                                                                                                                                                                                                                                                                                                                                                                                                      | Phase 3        | 22  | 1-Nov-10   | 11-Jan-18      |
| IL-12 | NCT01440816 | IL-12 Gene and in Vivo Electroporation-Mediated Plasmid DNA Vaccine Therapy in Patients With Merkel Cell Cancer                                                        | Completed  | Merkel Cell Carcinoma                                                                                                                | Biological: Tavokinogene Telseplasmid (tavo) Device: OncoSec Medical System (OMS)                                                                                          | Percentage of Participants Who Experienced At Least 2-Fold Increase in Expression of IL-12 Protein in the Tumor Tissue After Intratumoral (IT) pIL-12 Injections and In Vivo Electroporation Percentage of Participants With Adverse Events (AEs) and Serious Adverse Events (SAEs) Objective Response Rate (ORR) in Injected and Non-injected (Distant) Lesions Time to Progression (TTP) Overall Survival Immunologic Effects of IT pIL-12 Injection and In Vivo EP Measured By: Percentage of Participants With a Positive Fold Change (Log2) in IL-12A Messenger Ribonucleic Acid (mRNA) for Patient Pre- and                                                                                                                        | Phase 3        | 15  | 3-Jan-12   | 18-Jan-18      |



|       |             |                                                                                                                                                                                |                        |                                                                                                                                                     |                                                                                      |                                                                                                                                                                                                                                                                                                                                                                                                                                                                                                                                                                                                                                                                                                                                                                                                                                                                                                                                               |                 |    |           |                |
|-------|-------------|--------------------------------------------------------------------------------------------------------------------------------------------------------------------------------|------------------------|-----------------------------------------------------------------------------------------------------------------------------------------------------|--------------------------------------------------------------------------------------|-----------------------------------------------------------------------------------------------------------------------------------------------------------------------------------------------------------------------------------------------------------------------------------------------------------------------------------------------------------------------------------------------------------------------------------------------------------------------------------------------------------------------------------------------------------------------------------------------------------------------------------------------------------------------------------------------------------------------------------------------------------------------------------------------------------------------------------------------------------------------------------------------------------------------------------------------|-----------------|----|-----------|----------------|
| IL-12 | NCT01579318 | Phase II Intratumoral IL12 Plasmid Electroporation in Cutaneous Lymphoma                                                                                                       | Terminated             | Cutaneous T Cell Lymphomas (CTCL) Mycosis Fungoides (MF)                                                                                            | Biological: Tavokinogene Telseplasmid (tavo) Device: OncoSec Medical System (OMS)    | Objective Response Rate Assessed by Modified Severity Weighted Assessment Tool (mSWAT) Score in the Skin Objective Response Rate Assessed by Modified Severity Weighted Assessment Tool (mSWAT) Composite Global Score Percentage of Participants With Adverse Events (AEs) and Serious Adverse Events (SAEs) Duration of Overall Objective Response Assessed by mSWAT Skin Score Time to Overall Objective                                                                                                                                                                                                                                                                                                                                                                                                                                                                                                                                   | Not Applicable  | 2  | 8-Jun-12  | 3-Jan-18       |
| IL-12 | NCT01236573 | Cell Therapy for Metastatic Melanoma Using CD8 Enriched Tumor Infiltrating Lymphocytes                                                                                         | Terminated             | Skin Cancer Metastatic Melanoma                                                                                                                     | Drug: Fludarabine Drug: Cyclophosphamide Biological: IL-12 transduced TIL            | Maximum Tolerated Dose (MTD) Response (Complete Response (CR) + Partial Response (PR)) to Therapy Number of Participants With Adverse Events                                                                                                                                                                                                                                                                                                                                                                                                                                                                                                                                                                                                                                                                                                                                                                                                  | Phase 1 Phase 2 | 34 | Oct-10    | 26-Nov-15      |
| IL-12 | NCT01468896 | Cetuximab and Recombinant Interleukin-12 in Treating Patients With Squamous Cell Carcinoma of the Head and Neck That is Recurrent, Metastatic, or Cannot Be Removed by Surgery | Active, not recruiting | Metastatic Head and Neck Squamous Cell Carcinoma Recurrent Head and Neck Squamous Cell Carcinoma Unresectable Head and Neck Squamous Cell Carcinoma | Biological: Cetuximab Biological: Edodekin alfa Other: Laboratory Biomarker Analysis | Number of Dose-limiting Toxicity Incidents to Determine the Maximum Tolerated Dose of IL-12, Evaluated Using the National Cancer Institute Common Terminology Criteria for Adverse Events Version 4.0 (Phase I) Proportion of Patients Who Have Any Response to Treatment (Complete Response or Partial Response), Determined According to Response Evaluation Criteria in Solid Tumors (Phase II) Induction of Systemic Plasma Levels of Interferon-gamma Number of Confirmed Clinical Responses (Phase I) Overall Survival (Phase II) Proportion of Patients Who Are Progression-free (Phase I) Time to Best Overall Response Rate (BORR) by RECIST v1.1 Number of Participants With Adverse Events (AEs) and Serious Adverse Events (SAEs) Best Overall Response Rate (BORR) by Immune-related Response Criteria (irRC) Regression Rate of Treated and Untreated Lesions Median Progression Free Survival (PFS) Median Time to Progression | Phase 2 Phase 3 | 23 | 26-Oct-11 | 28-Jan-20      |
| IL-12 | NCT02345330 | Trial of pIL-12 Electroporation in Squamous Cell Carcinoma of the Head and Neck (IL12HNSCC)                                                                                    | Terminated             | Head and Neck Squamous Cell Carcinoma                                                                                                               | Biological: Tavokinogene Telseplasmid (tavo) Device: OncoSec Medical System (OMS)    | Best Overall Response Rate (BORR) by Immune-related Response Criteria (irRC) Regression Rate of Treated and Untreated Lesions Median Progression Free Survival (PFS) Median Time to Progression                                                                                                                                                                                                                                                                                                                                                                                                                                                                                                                                                                                                                                                                                                                                               | Phase 1 Phase 2 | 4  | 21-May-15 | 3-Jan-18       |
| IL-12 | NCT01502293 | Trial of pIL-12 Electroporation Malignant Melanoma                                                                                                                             | Completed              | Melanoma                                                                                                                                            | Biological: Tavokinogene Telseplasmid (tavo) Device: OncoSec Medical System (OMS)    | Best Overall Objective Response Rate (ORR) by Modified "Skin" RECIST Percentage of Participants With Adverse Events (AEs) and Serious Adverse Events (SAEs) Median Overall Survival (OS) Objective Response Rate (ORR) by Immune Related Response Criteria (irRC) Duration of Objective Response Time to First Objective Response Median Progression Free Survival Regression Rate of Treated and Untreated Lesions                                                                                                                                                                                                                                                                                                                                                                                                                                                                                                                           | Phase 3         | 51 | 14-Feb-12 | 9-Oct-19       |
| IL-12 | NCT02544061 | NM-IL-12 (rHuIL-12) in Subjects With Open Surgical Wounds                                                                                                                      | Completed              | Colostomy Stoma                                                                                                                                     | Biological: NM-IL-12 Drug: Placebo                                                   | Safety and tolerability of NM-IL-12 (Number of subjects with adverse events) Incidence of surgical site infections at the midline site (wound) and at the stoma site (wound) that occur within the period from surgery through postop day 42 Median time to greater than 50% surgical stoma site (wound) closure relative to the stoma site (wound) size at enrollment Area under the plasma concentration versus time curve (AUC) of NM-IL-12 Peak Plasma Concentration (Cmax) of NM-IL-12 Immunogenicity of HemaMax (anti-NM-IL-12 antibodies as a measure of immunogenicity) Pharmacodynamics of NM-IL-12, Peak Plasma Concentration (Cmax) of IFN-g Pharmacodynamics of NM-IL-12, Area under the plasma concentration versus time curve (AUC) of IFN-g Pharmacodynamics of NM-IL-12, Area under the plasma concentration versus time curve (AUC) of IP-                                                                                   | Phase 2         | 18 | 1-Mar-16  | 16-Nov-18      |
| IL-12 | NCT00406939 | Vector Delivery of the IL-12 Gene in Men With Prostate Cancer                                                                                                                  | Completed              | Prostatic Neoplasms Prostate Cancer                                                                                                                 | Genetic: IL-12 gene                                                                  | To determine whether the treatment is associated with significant toxicity. Collection of data on tumor responses produced by the study treatment. Collection data on immune responses induced by the study treatment.                                                                                                                                                                                                                                                                                                                                                                                                                                                                                                                                                                                                                                                                                                                        | Phase 1         | 4  | Jun-98    | 10-Jul-08      |
| IL-12 | NCT00004070 | Gene Therapy in Treating Patients With Unresectable, Recurrent, or Refractory Head and Neck Cancer                                                                             | Completed              | Head and Neck Cancer                                                                                                                                | Biological: IL-12                                                                    | Maximum Tolerated Dose (MTD) [Phase I] Dose Limiting Toxicity (DLT) [Phase I] Grade 3-4 Toxicity Rate [Phase II] Time to Progressive Disease (TTP) [Phase III] Response [Phase I] Phase 2                                                                                                                                                                                                                                                                                                                                                                                                                                                                                                                                                                                                                                                                                                                                                     | Phase 1 Phase 2 | 7  | Jul-99    | April 20, 2017 |

|       |             |                                                                                                                                    |           |                                                                                                                                                                                                                                                                                                                                                                                                                                                                                                                                                                                                                                                                                                                                                                                                                                                                                                                                                                                                                                                                                                                                                                                                                                                                                                                                                                                                                                                                                                                                                                                                               |                                                                                  |                                                                                                                                                                                                                                                              |         |     |        |            |     |
|-------|-------------|------------------------------------------------------------------------------------------------------------------------------------|-----------|---------------------------------------------------------------------------------------------------------------------------------------------------------------------------------------------------------------------------------------------------------------------------------------------------------------------------------------------------------------------------------------------------------------------------------------------------------------------------------------------------------------------------------------------------------------------------------------------------------------------------------------------------------------------------------------------------------------------------------------------------------------------------------------------------------------------------------------------------------------------------------------------------------------------------------------------------------------------------------------------------------------------------------------------------------------------------------------------------------------------------------------------------------------------------------------------------------------------------------------------------------------------------------------------------------------------------------------------------------------------------------------------------------------------------------------------------------------------------------------------------------------------------------------------------------------------------------------------------------------|----------------------------------------------------------------------------------|--------------------------------------------------------------------------------------------------------------------------------------------------------------------------------------------------------------------------------------------------------------|---------|-----|--------|------------|-----|
| IL-12 | NCT00004074 | Interleukin-12 and Trastuzumab in Treating Patients With Cancer That Has High Levels of HER2/Neu                                   | Completed | Advanced Adult Primary Liver Cancer Anaplastic Thyroid Cancer Bone Metastases Carcinoma of the Appendix Distal Urethral Cancer Fallopian Tube Cancer Gastrinoma Glucagonoma Inflammatory Breast Cancer Insulinoma Liver Metastases Localized Unresectable Adult Primary Liver Cancer Lung Metastases Male Breast Cancer Malignant Pericardial Effusion Malignant Pleural Effusion Metastatic Gastrointestinal Carcinoid Tumor Metastatic Parathyroid Cancer Metastatic Transitional Cell Cancer of the Renal Pelvis and Ureter Newly Diagnosed Carcinoma of Unknown Primary Occult Non-small Cell Lung Cancer Pancreatic Polypeptide Tumor Primary Peritoneal Cavity Cancer Proximal Urethral Cancer Pulmonary Carcinoid Tumor Recurrent Adenoid Cystic Carcinoma of the Oral Cavity Recurrent Adrenocortical Carcinoma Recurrent Adult Primary Liver Cancer Recurrent Anal Cancer Recurrent Bladder Cancer Recurrent Breast Cancer Recurrent Carcinoma of Unknown Primary Recurrent Cervical Cancer Recurrent Colon Cancer Recurrent Endometrial Carcinoma Recurrent Esophageal Cancer Recurrent Extrahepatic Bile Duct Cancer Recurrent Gallbladder Cancer Recurrent Gastric Cancer Recurrent Gastrointestinal Carcinoid Tumor Recurrent Islet Cell Carcinoma Recurrent Malignant Testicular Germ Cell Tumor Recurrent Mucoepidermoid Carcinoma of the Oral Cavity Recurrent Non-small Cell Lung Cancer Recurrent Ovarian Epithelial Cancer Recurrent Pancreatic Cancer Recurrent Parathyroid Cancer Recurrent Prostate Cancer Recurrent Rectal Cancer Recurrent Renal Cell Cancer Recurrent Salivary Gland | Biological: recombinant interleukin-12 Biological: 007/carboplatin/trastuzumab   | Maximum tolerated dose (MTD) determined according to dose-limiting toxicities (DLTs) graded using Common Terminology Criteria for Adverse Events version 2.0 (CTCAE v2.0)                                                                                    | Phase 1 | 15  | Aug-99 | 28-Feb-13  |     |
| IL-12 | NCT00016289 | Interleukin-12 in Treating Patients With Ovarian Epithelial Cancer or Primary Peritoneal Cancer                                    | Completed | Primary Peritoneal Cavity Cancer Recurrent Ovarian Epithelial Cancer                                                                                                                                                                                                                                                                                                                                                                                                                                                                                                                                                                                                                                                                                                                                                                                                                                                                                                                                                                                                                                                                                                                                                                                                                                                                                                                                                                                                                                                                                                                                          | Biological: recombinant interleukin-12                                           | Rate of remission determined by laparoscopy or laparotomy Toxicity graded using the NCI CTC version 3.0 Progression-free interval                                                                                                                            | Phase 2 | 30  | Jul-01 | 23-Jan-13  |     |
| IL-12 | NCT00003046 | Interleukin-12 in Treating Patients With Cancer in the Abdomen                                                                     | Completed | Anal Cancer Colorectal Cancer Gallbladder Cancer Gastric Cancer Pancreatic Cancer                                                                                                                                                                                                                                                                                                                                                                                                                                                                                                                                                                                                                                                                                                                                                                                                                                                                                                                                                                                                                                                                                                                                                                                                                                                                                                                                                                                                                                                                                                                             | Biological: Recombinant Interleukin-12                                           | Maximum Tolerated Dose (MTD) of Intraperitoneal Interleukin-12                                                                                                                                                                                               | Phase 1 | 29  | Aug-97 | 30-Jul-12  |     |
| IL-12 | NCT00003210 | Interleukin-12 in Treating Patients With Previously Treated Non-Hodgkin's Lymphoma or Hodgkin's Disease                            | Completed | Extranodal Marginal Zone B-cell Lymphoma of Mucosa-associated Lymphoid Tissue Nodal Marginal Zone B-cell Lymphoma Recurrent Adult Diffuse Large Cell Lymphoma Recurrent Adult Diffuse Mixed Cell Lymphoma Recurrent Adult Diffuse Small Cleaved Cell Lymphoma Recurrent Adult Hodgkin Lymphoma Recurrent Adult Immunoblastic Large Cell Lymphoma Recurrent Cutaneous T-cell Non-Hodgkin Lymphoma Recurrent Grade 1 Follicular Lymphoma Recurrent Grade 2 Follicular Lymphoma Recurrent Grade 3 Follicular Lymphoma Recurrent Mantle Cell Lymphoma Recurrent Marginal Zone Lymphoma Recurrent Mycosis Fungoides Sezary Syndrome Recurrent Small                                                                                                                                                                                                                                                                                                                                                                                                                                                                                                                                                                                                                                                                                                                                                                                                                                                                                                                                                                | Biological: recombinant interleukin-12 Other: laboratory biomarker analysis      | Response rate Toxicity as assessed by CTC version 2.0                                                                                                                                                                                                        | Phase 2 | 105 | Feb-98 | April 2015 | 15, |
| IL-12 | NCT00015977 | Vaccine Therapy Plus Interleukin-12 in Treating Patients With Metastatic Prostate Cancer That Has Not Responded to Hormone Therapy | Completed | Prostate Cancer                                                                                                                                                                                                                                                                                                                                                                                                                                                                                                                                                                                                                                                                                                                                                                                                                                                                                                                                                                                                                                                                                                                                                                                                                                                                                                                                                                                                                                                                                                                                                                                               | Biological: PSA prostate cancer vaccine Biological: recombinant interleukin-12   | Disease response                                                                                                                                                                                                                                             | Phase 2 | 13  | Nov-01 | 7-Mar-14   |     |
| IL-12 | NCT00004893 | Interleukin-12 in Treating Patients With Metastatic or Recurrent Breast                                                            | Completed | Breast Cancer                                                                                                                                                                                                                                                                                                                                                                                                                                                                                                                                                                                                                                                                                                                                                                                                                                                                                                                                                                                                                                                                                                                                                                                                                                                                                                                                                                                                                                                                                                                                                                                                 | Biological: recombinant interleukin-12                                           | disease progression time to progression overall survival                                                                                                                                                                                                     | Phase 2 | 5   | Dec-99 | 19-Jul-16  |     |
| IL-12 | NCT02531425 | Evaluation of Pharmacodynamic Effects of IT-pIL12-EP in Patients With TNBC                                                         | Completed | ER-Negative PR-Negative HER2-Negative Breast Cancer                                                                                                                                                                                                                                                                                                                                                                                                                                                                                                                                                                                                                                                                                                                                                                                                                                                                                                                                                                                                                                                                                                                                                                                                                                                                                                                                                                                                                                                                                                                                                           | Biological: IT-pIL12-EP                                                          | Changes in the proportion of intratumoral lymphocyte subsets NanoString-based gene expression Number of Participants with Treatment-Related Adverse Events as assessed by the CTCAE v4.0 Anti-tumor activity Detection of plasmid IL-12 in untreated lesions | Phase 1 | 10  | Sep-15 | 16-Jul-19  |     |
| IL-12 | NCT00005604 | Interleukin-12 Plus Interleukin-2 in Treating Patients With Advanced                                                               | Completed | Unspecified Adult Solid Tumor, Protocol Specific                                                                                                                                                                                                                                                                                                                                                                                                                                                                                                                                                                                                                                                                                                                                                                                                                                                                                                                                                                                                                                                                                                                                                                                                                                                                                                                                                                                                                                                                                                                                                              | Biological: recombinant interleukin-12 Biological: aldesleukin Other: laboratory | MTD defined as the dose level that is just below the dose on which at least 2 of 6 patients developed a dose-limiting toxicity (DLT) as assessed by CTC version 2.0                                                                                          | Phase 1 | 25  | Mar-00 | 1-Feb-13   |     |
| IL-12 | NCT00003439 | Interleukin-12 in Treating Patients With Refractory Advanced-Stage Ovarian Cancer or Abdominal                                     | Completed | Cancer                                                                                                                                                                                                                                                                                                                                                                                                                                                                                                                                                                                                                                                                                                                                                                                                                                                                                                                                                                                                                                                                                                                                                                                                                                                                                                                                                                                                                                                                                                                                                                                                        | Biological: recombinant interleukin-12                                           |                                                                                                                                                                                                                                                              | Phase 1 | 36  | Aug-98 | 7-Feb-13   |     |

|       |             |                                                                                                                                                                                             |           |                                                                                                                                                                                                                                                                                         |                                                                                                                                                                             |                                                                                                                                                                                                                                                                                                             |                 |    |          |           |
|-------|-------------|---------------------------------------------------------------------------------------------------------------------------------------------------------------------------------------------|-----------|-----------------------------------------------------------------------------------------------------------------------------------------------------------------------------------------------------------------------------------------------------------------------------------------|-----------------------------------------------------------------------------------------------------------------------------------------------------------------------------|-------------------------------------------------------------------------------------------------------------------------------------------------------------------------------------------------------------------------------------------------------------------------------------------------------------|-----------------|----|----------|-----------|
| IL-12 | NCT02960594 | hTERT Immunotherapy Alone or in Combination With IL-12 DNA Followed by Electroporation in Adults With Solid Tumors at High Risk of                                                          | Completed | Breast Cancer Lung Cancer Pancreatic Cancer Head and Neck Cancer Ovarian Cancer ColoRectal Cancer Gastric Cancer Esophageal Cancer HepatoCellular Carcinoma                                                                                                                             | Biological: INO-1400 Biological: INO-9012 Biological: INO-1401                                                                                                              | Adverse events graded in accordance with "Common Terminology Criteria for Adverse Events (CTCAE)", NCI version 4.03 Injection site reactions including, but not necessarily limited to, local skin erythema, induration, pain and tenderness at administration site Changes in safety laboratory parameters | Phase 1         | 93 | Dec-14   | 19-Nov-18 |
| IL-12 | NCT00019188 | Interleukin-12 in Treating Patients With AIDS-Related Kaposi's                                                                                                                              | Completed | Epidemic Kaposi's Sarcoma Recurrent Kaposi's Sarcoma                                                                                                                                                                                                                                    | Drug: interleukin-12                                                                                                                                                        |                                                                                                                                                                                                                                                                                                             | Phase 1 Phase   |    | Jan-97   | 20-Jun-13 |
| IL-12 | NCT00323206 | Phase I Trial of Intratumoral pIL-12 Electroporation in Malignant                                                                                                                           | Completed | Malignant Melanoma                                                                                                                                                                                                                                                                      | Biological: IL-12p DNA Procedure: Intratumoral Electroporation                                                                                                              | Maximum Tolerated Dose (MTD) Local and Systemic Response                                                                                                                                                                                                                                                    | Not Applicable  | 24 | Jun-04   | 23-Feb-17 |
| IL-12 | NCT00026182 | Rituximab and Interleukin-12 in Treating Patients With B-Cell Non-Hodgkin's Lymphoma                                                                                                        | Completed | Extranodal Marginal Zone B-cell Lymphoma of Mucosa-associated Lymphoid Tissue Nodal Marginal Zone B-cell Lymphoma Recurrent Grade 1 Follicular Lymphoma Recurrent Grade 2 Follicular Lymphoma Recurrent Mantle Cell Lymphoma Recurrent Small Lymphocytic Lymphoma Splenic Marginal Zone | Biological: rituximab Biological: recombinant interleukin-12 Other: laboratory biomarker analysis Other: questionnaire administration Procedure: quality-of-life assessment | Objective response Overall response rate for MCL patients Overall survival Time to treatment failure Complete response rate Quality of life assessed using FACT-BRM                                                                                                                                         | Phase 2         | 99 | Oct-01   | 26-Aug-13 |
| IL-12 | NCT0003149  | Interleukin-12 in Treating Patients With Multiple Myeloma                                                                                                                                   | Completed | Multiple Myeloma and Plasma Cell Neoplasm                                                                                                                                                                                                                                               | Biological: recombinant interleukin-12                                                                                                                                      |                                                                                                                                                                                                                                                                                                             | Phase 2         | 40 | Dec-97   | 21-Jun-13 |
| IL-12 | NCT00030317 | Interleukin-12 in Treating Patients With Advanced or Recurrent Cancer of the Cervix                                                                                                         | Completed | Cervical Cancer                                                                                                                                                                                                                                                                         | Biological: recombinant interleukin-12                                                                                                                                      |                                                                                                                                                                                                                                                                                                             | Phase 2         |    | Jul-97   | 21-Jun-13 |
| IL-12 | NCT0003107  | Interleukin-12 in Treating Patients With Hematologic Cancers or Solid Tumors                                                                                                                | Completed | Breast Cancer Chronic Myeloproliferative Disorders Gestational Trophoblastic Tumor Kidney Cancer Leukemia Lymphoma Multiple Myeloma and Plasma Cell Neoplasm Myelodysplastic Syndromes Neuroblastoma Ovarian Cancer Testicular                                                          | Biological: recombinant interleukin-12                                                                                                                                      |                                                                                                                                                                                                                                                                                                             | Phase 1         |    | Oct-97   | 10-Sep-14 |
| IL-12 | NCT00026143 | Interleukin-12 and Interferon Alfa in Treating Patients With Metastatic Malignant Melanoma                                                                                                  | Completed | Recurrent Melanoma Stage IV Melanoma                                                                                                                                                                                                                                                    | Biological: recombinant interleukin-12 Biological: recombinant interferon alfa Other: laboratory biomarker analysis                                                         | Response rate PFS                                                                                                                                                                                                                                                                                           | Phase 2         | 60 | Oct-01   | 5-Jun-13  |
| IL-12 | NCT00049459 | Gene Therapy in Treating Women With Metastatic Breast Cancer                                                                                                                                | Completed | Breast Cancer                                                                                                                                                                                                                                                                           | Biological: adenovirus-mediated human interleukin-12                                                                                                                        | Maximum tolerated dose Toxicity and safety Tumor response progression Immune response                                                                                                                                                                                                                       | Phase 1         | 3  | Aug-08   | 11-Jan-17 |
| IL-12 | NCT0003451  | Interleukin-12 Followed by Interferon Alfa in Treating Patients With Advanced Cancer                                                                                                        | Completed | Chronic Myeloproliferative Disorders Leukemia Lymphoma Multiple Myeloma and Plasma Cell Neoplasm Myelodysplastic Syndromes Precancerous Condition Unspecified Adult                                                                                                                     | Biological: recombinant interferon alfa Biological: recombinant interleukin-12                                                                                              |                                                                                                                                                                                                                                                                                                             | Phase 1         | 40 | Aug-98   | 1-Feb-13  |
| IL-12 | NCT00028535 | Interleukin-12, Paclitaxel, and Trastuzumab in Treating Patients With Solid Tumors                                                                                                          | Completed | Male Breast Cancer Recurrent Breast Cancer Recurrent Endometrial Carcinoma Recurrent Gastric Cancer Recurrent Non-small Cell Lung Cancer Recurrent Ovarian Epithelial Cancer Recurrent                                                                                                  | Biological: trastuzumab Drug: paclitaxel Biological: recombinant interleukin-12                                                                                             | MTD of IL-12, defined as the dose level one level beneath that dose at which 2 or more of 6 patients showed DLT, based on the NCI CTC version 2.0                                                                                                                                                           | Phase 1         | 18 | Nov-01   | 4-Jun-13  |
| IL-12 | NCT00034260 | Interleukin-12 Plus Rituximab in Treating Patients With Non-                                                                                                                                | Completed | Lymphoma                                                                                                                                                                                                                                                                                | Biological: recombinant interleukin-12 Biological: rituximab                                                                                                                |                                                                                                                                                                                                                                                                                                             | Phase 1         |    | Oct-99   | 3-Aug-11  |
| IL-12 | NCT00033330 | Interleukin-12 in Treating Patients With Advanced Cancer                                                                                                                                    | Completed | Unspecified Adult Solid Tumor, Protocol Specific                                                                                                                                                                                                                                        | Biological: recombinant interleukin-12                                                                                                                                      |                                                                                                                                                                                                                                                                                                             | Phase 1         | 54 | Jul-98   | 11-Feb-13 |
| IL-12 | NCT01489371 | EGEN-001 and Pegylated Liposomal Doxorubicin Hydrochloride in Treating Patients With Recurrent or Persistent Ovarian Epithelial Cancer, Fallopian Tube Cancer, or Primary Peritoneal Cancer | Completed | Ovarian Clear Cell Cystadenocarcinoma Ovarian Endometrioid Adenocarcinoma Ovarian Seromucinous Carcinoma Ovarian Serous Cystadenocarcinoma Ovarian Undifferentiated Carcinoma Recurrent Fallopian Tube Carcinoma Recurrent Ovarian Carcinoma Recurrent Primary Peritoneal Carcinoma     | Other: Laboratory Biomarker Analysis Biological: PEG-PEI-cholesterol Lipopolymer-encased IL-12 DNA Plasmid Vector GEN-1 Drug: Pegylated Liposomal Doxorubicin Hydrochloride | First course DLTs The grade of toxicity as assessed by CTCAE v 4.0 Objective tumor response (complete and partial response)                                                                                                                                                                                 | Phase 1         | 16 | 9-Jul-12 | 12-Mar-19 |
| IL-12 | NCT00034244 | Interleukin-12 and Interferon Alfa in Treating Patients With Metastatic Kidney Cancer or Malignant                                                                                          | Completed | Kidney Cancer Melanoma (Skin)                                                                                                                                                                                                                                                           | Biological: recombinant interferon alfa Biological: recombinant interleukin-12                                                                                              |                                                                                                                                                                                                                                                                                                             | Phase 1         | 30 | Mar-00   | 21-Mar-13 |
| IL-12 | NCT00020449 | Liposomal Doxorubicin and Interleukin-12 in Treating Patients With AIDS-Related Kaposi's                                                                                                    | Completed | Sarcoma                                                                                                                                                                                                                                                                                 | Biological: recombinant interleukin-12 Drug: paclitaxel Drug: pegylated liposomal doxorubicin hydrochloride                                                                 |                                                                                                                                                                                                                                                                                                             | Phase 2         |    | Jan-01   | 19-Jun-13 |
| IL-12 | NCT00033339 | Vaccine Therapy With or Without Interleukin-12 in Treating Patients With Stage III or Stage IV Melanoma                                                                                     | Completed | Intraocular Melanoma Melanoma (Skin)                                                                                                                                                                                                                                                    | Biological: gp100 antigen Biological: incomplete Freund's adjuvant Biological: recombinant interleukin-12 Biological:                                                       |                                                                                                                                                                                                                                                                                                             | Phase 2         | 48 | Nov-98   | 22-May-14 |
| IL-12 | NCT00033575 | Interleukin-12 Following Chemotherapy in Treating Patients With Refractory HIV-Associated Non-                                                                                              | Completed | Lymphoma                                                                                                                                                                                                                                                                                | Biological: filgrastim Biological: recombinant interleukin-12 Drug: etoposide Drug: ifosfamide                                                                              |                                                                                                                                                                                                                                                                                                             | Phase 2         | 40 | Jan-99   | 8-Feb-13  |
| IL-12 | NCT00032952 | Vaccine Therapy and Interleukin-12 in Treating Patients With Metastatic Melanoma                                                                                                            | Completed | Melanoma (Skin)                                                                                                                                                                                                                                                                         | Biological: MART-1 antigen Biological: recombinant MAGE-3.1 antigen Biological: recombinant interleukin-12                                                                  | Clinical Response Rate                                                                                                                                                                                                                                                                                      | Phase 1 Phase 2 | 20 | Jan-97   | 5-Sep-13  |

|       |             |                                                                                                                                                                                                                                              |           |                                                                                                                                                                                                                                                                                    |                                                                                                                                                                                                                                              |                                                                                                                                                                                                                                                                                                                                                                                                                                                                                                                                                                                                                                                                                   |                 |     |            |           |
|-------|-------------|----------------------------------------------------------------------------------------------------------------------------------------------------------------------------------------------------------------------------------------------|-----------|------------------------------------------------------------------------------------------------------------------------------------------------------------------------------------------------------------------------------------------------------------------------------------|----------------------------------------------------------------------------------------------------------------------------------------------------------------------------------------------------------------------------------------------|-----------------------------------------------------------------------------------------------------------------------------------------------------------------------------------------------------------------------------------------------------------------------------------------------------------------------------------------------------------------------------------------------------------------------------------------------------------------------------------------------------------------------------------------------------------------------------------------------------------------------------------------------------------------------------------|-----------------|-----|------------|-----------|
| IL-12 | NCT00031733 | Vaccine Therapy and Interleukin-12 With Either Alum or Sargramostim After Surgery in Treating Patients With Melanoma                                                                                                                         | Completed | Intraocular Melanoma Melanoma (Skin)                                                                                                                                                                                                                                               | Biological: MART-1 antigen Biological: gp100 antigen Biological: incomplete Freund's adjuvant Biological: recombinant interleukin-12 Biological: sargramostim Biological: tyrosinase peptide Drug: alum adjuvant Procedure: adjuvant therapy |                                                                                                                                                                                                                                                                                                                                                                                                                                                                                                                                                                                                                                                                                   | Phase 2         | 60  | Feb-02     | 22-May-14 |
| IL-12 | NCT00001563 | EPOCH Chemotherapy +/- IL-12 for Previously Untreated and EPOCH Plus Rituximab for Previously Treated Patients With AIDS-                                                                                                                    | Completed | AIDS Related Lymphoma AIDS-Associated Lymphoma                                                                                                                                                                                                                                     | Biological: Filgrastim Biological: Rituximab Drug: EPOCH                                                                                                                                                                                     | Determination of safety profile and response rates                                                                                                                                                                                                                                                                                                                                                                                                                                                                                                                                                                                                                                | Phase 2         | 39  | 12-Dec-96  | 27-Jan-20 |
| IL-12 | NCT01213407 | Dendritic Cell Cancer Vaccine for High-grade Glioma                                                                                                                                                                                          | Completed | Glioblastoma Multiforme                                                                                                                                                                                                                                                            | Drug: Trivax, Temozolomide, Surgery, Radiotherapy Drug: Temozolomide, Surgery, Radiotherapy                                                                                                                                                  | Progression free survival Quality of Life Progression free survival at 18 and 24 months Overall survival                                                                                                                                                                                                                                                                                                                                                                                                                                                                                                                                                                          | Phase 2         | 87  | April 2010 | 19-May-16 |
| IL-12 | NCT00899821 | Microsphere-Delivered Cytokines in Increasing Tumor Response in Lymphocytes From Patients With Head and Neck Cancer                                                                                                                          | Completed | Head and Neck Cancer                                                                                                                                                                                                                                                               | Biological: aldesleukin Biological: recombinant interleukin-12 Biological: sargramostim Other: immunologic technique Procedure: biopsy                                                                                                       | Local and sustained cytokine combinations in evaluating antitumor response in human peripheral blood lymphocytes obtained from patients with squamous cell carcinoma of the head and neck Vaccine potential in provoking or enhancing long-term systemic immunity against head and neck cancer Response rate                                                                                                                                                                                                                                                                                                                                                                      | Not Applicable  |     | Jun-00     | 9-Nov-12  |
| IL-12 | NCT00030342 | Biological Therapy and Chemotherapy in Treating Patients With Metastatic Kidney Cancer or                                                                                                                                                    | Completed | Colorectal Cancer Kidney Cancer                                                                                                                                                                                                                                                    | Biological: recombinant interferon alfa Biological: sargramostim Biological: therapeutic autologous lymphocytes Drug:                                                                                                                        | Response as measured by RECIST guidelines and Kaplan-Meier method at 5 years Survival as measured by the Kaplan-Meier method at 5 years Safety as measured by NCI common toxicity table at study completion                                                                                                                                                                                                                                                                                                                                                                                                                                                                       | Phase 1 Phase 2 | 60  | Nov-01     | 26-Jun-13 |
| IL-12 | NCT00003556 | Vaccine Therapy in Treating Patients With Melanoma                                                                                                                                                                                           | Completed | Melanoma (Skin)                                                                                                                                                                                                                                                                    | Biological: ALVAC-hB7.1 Biological: canarypox-hIL-12 melanoma vaccine                                                                                                                                                                        |                                                                                                                                                                                                                                                                                                                                                                                                                                                                                                                                                                                                                                                                                   | Phase 1         | 15  | Jan-99     | 8-Feb-13  |
| IL-12 | NCT00455221 | Safety Assessment of a Multi-peptide-gene Vaccine in CML                                                                                                                                                                                     | Completed | Leukemia, Myeloid, Chronic                                                                                                                                                                                                                                                         | Biological: Bcr-abl multi-peptide vaccine Genetic: Cytokine gene adjuvant                                                                                                                                                                    | To assess safety of bcr-abl peptide vaccination in Ph+ or MRD CML patients To measure the development of a molecular response to vaccination as measured by 1 log decrease in qRT-PCR BCR-ABL levels for at least 3 months; To measure the development of immune response following vaccination                                                                                                                                                                                                                                                                                                                                                                                   | Phase 1         | 12  | Feb-08     | 4-Jun-12  |
| IL-13 | NCT02494206 | Immunotherapy for the Treatment of Breast Cancer Related Upper Extremity Lymphedema (BCRL)                                                                                                                                                   | Completed | Breast Cancer Upper Extremity Lymphedema                                                                                                                                                                                                                                           | Drug: QBX258                                                                                                                                                                                                                                 | Volume Changes as Measured by Perometry                                                                                                                                                                                                                                                                                                                                                                                                                                                                                                                                                                                                                                           | Not Applicable  | 9   | Jul-15     | 8-Nov-18  |
| IL-13 | NCT00089427 | IL13-PE38QQR Infusion After Tumor Resection, Followed by Radiation Therapy With or Without Temozolomide in Patients With                                                                                                                     | Completed | Glioblastoma Multiforme Anaplastic Astrocytoma Oligoastrocytoma                                                                                                                                                                                                                    | Drug: IL13-PE38QQR Procedure: Surgery for placement Procedure: Radiation therapy Drug: Temozolomide with radiation therapy                                                                                                                   |                                                                                                                                                                                                                                                                                                                                                                                                                                                                                                                                                                                                                                                                                   | Phase 1         | 24  | Jul-04     | 4-Jul-11  |
| IL-13 | NCT00036972 | Immunotoxin Therapy Before and After Surgery in Treating Patients With Recurrent Malignant Glioma                                                                                                                                            | Completed | Brain and Central Nervous System Tumors                                                                                                                                                                                                                                            | Biological: cintredekin besudotox Procedure: adjuvant therapy Procedure: conventional                                                                                                                                                        |                                                                                                                                                                                                                                                                                                                                                                                                                                                                                                                                                                                                                                                                                   | Phase 1         |     | Nov-01     | 26-Jun-13 |
| IL-13 | NCT00041587 | Pre-operative IL13-PE38QQR in Patients With Recurrent or Progressive Malignant Glioma                                                                                                                                                        | Completed | Malignant Glioma Glioblastoma Multiforme Anaplastic Astrocytoma Mixed Oligoastrocytoma                                                                                                                                                                                             | Drug: IL13-PE38QQR Procedure: targeted fusion protein therapy Procedure: surgery                                                                                                                                                             |                                                                                                                                                                                                                                                                                                                                                                                                                                                                                                                                                                                                                                                                                   | Phase 1 Phase 2 | 80  | Jul-02     | 6-Jun-11  |
| IL-13 | NCT00006268 | Immunotoxin Therapy in Treating Patients With Malignant Glioma                                                                                                                                                                               | Completed | Brain and Central Nervous System Tumors                                                                                                                                                                                                                                            | Biological: cintredekin besudotox Drug: isolated perfusion Procedure: conventional                                                                                                                                                           |                                                                                                                                                                                                                                                                                                                                                                                                                                                                                                                                                                                                                                                                                   | Phase 1 Phase 2 |     | Oct-00     | 24-Jun-13 |
| IL-13 | NCT01082926 | Phase I Study of Cellular Immunotherapy for Recurrent/Refractory Malignant Glioma Using Intratumoral Infusions of GRm13Z40-2, An Allogeneic CD8+ Cytolytic T-Cell Line Genetically Modified to Express the IL 13-Zetakine and HyTK and to be | Completed | Anaplastic Astrocytoma Anaplastic Ependymoma Anaplastic Meningioma Anaplastic Oligodendroglioma Brain Stem Glioma Ependymoblastoma Giant Glioblastoma Glioblastoma Gliosarcoma Grade III Meningioma Meningeal Hemangiopericytoma Mixed Glioma Pineal Gland Astrocytoma Brain Tumor | Biological: therapeutic allogeneic lymphocytes Biological: aldesleukin Other: laboratory biomarker analysis Procedure: positron emission tomography                                                                                          | Safety of GRm13Z40-2 CTL CNS loco-regional cellular immunotherapy Safety of conjunction enhanced delivery (CED) of recombinant human Interleukin-2 (rhIL-2) used in conjunction with GRm13Z40-2 CTL adoptive transfer Toxicity as assessed by NCI CTCAE version 4.0 Ability of 9-(4-fluoro-3-hydroxy-methyl-butyl) guanine (18FHBG) positron emission tomography PET to image GRm13Z40-2 CTLs Impact of concurrent dexamethasone on the tempo and magnitude of T cell allograft rejection responses by tracking the frequency of anti-GRm13Z40-2 immune responses in serially acquired peripheral blood samples Evaluation of qanciclovir administration for ablating transferred | Phase 1         | 6   | May-10     | 8-Jun-15  |
| IL-13 | NCT00064779 | Imaging Study of the Distribution of IL13-PE38QQR Infused Before and After Surgery in Adult Patients With Recurrent Malignant Glioma                                                                                                         | Completed | Malignant Glioma Glioblastoma Multiforme Anaplastic Astrocytoma Anaplastic Oligodendroglioma Mixed Oligoastrocytoma                                                                                                                                                                | Drug: IL13-PE38QQR Procedure: targeted fusion protein therapy Procedure: surgery                                                                                                                                                             |                                                                                                                                                                                                                                                                                                                                                                                                                                                                                                                                                                                                                                                                                   | Phase 1         | 18  | Jul-03     | 6-Jun-11  |
| IL-13 | NCT00076986 | The PRECISE Trial: Study of IL13-PE38QQR Compared to GLIADEL Wafer in Patients With Recurrent Glioblastoma Multiforme                                                                                                                        | Completed | Glioblastoma Multiforme                                                                                                                                                                                                                                                            | Drug: IL13-PE38QQR Procedure: surgery and catheter placement (2 procedures) Drug: proflispan 20 with carmustine implant (GLIADEL 13 Wafer) Procedure: surgery and wafer                                                                      |                                                                                                                                                                                                                                                                                                                                                                                                                                                                                                                                                                                                                                                                                   | Phase 3         | 300 | Feb-04     | 6-Jun-11  |
| IL-13 | NCT00024570 | Interstitial Infusion of IL13-PE38QQR Cytotoxin in Recurrent Malignant                                                                                                                                                                       | Completed | Malignant Glioma Glioblastoma Multiforme Anaplastic Astrocytoma Mixed Oligoastrocytoma                                                                                                                                                                                             | Drug: IL13-PE38QQR Procedure: targeted fusion protein therapy Procedure: surgery                                                                                                                                                             |                                                                                                                                                                                                                                                                                                                                                                                                                                                                                                                                                                                                                                                                                   | Phase 1 Phase 2 | 60  | Nov-00     | 14-Nov-14 |
| IL-13 | NCT00024557 | Histologic Effect/Safety of Pre/Post-Operative IL13-PE38QQR in Recurrent Resectable Supratentorial Malignant Glioma Patients                                                                                                                 | Completed | Malignant Glioma Glioblastoma Multiforme Anaplastic Astrocytoma Mixed Oligoastrocytoma Malignant Astrocytoma                                                                                                                                                                       | Drug: IL13-PE38QQR Procedure: targeted fusion protein therapy Procedure: surgery                                                                                                                                                             |                                                                                                                                                                                                                                                                                                                                                                                                                                                                                                                                                                                                                                                                                   | Phase 1         | 40  | Jun-01     | 6-Jun-11  |

|       |             |                                                                                                                                                          |           |                                                                                                                                                                                                                                                                                                                                                                                                                                                                                                                                     |                                                                                                                |                                                                                                                                                                                                                                                                                                                                                                                                                                                                                                                                                                                                                                                                                                                                                                                                                                                                                                                                                                  |                 |    |               |                |
|-------|-------------|----------------------------------------------------------------------------------------------------------------------------------------------------------|-----------|-------------------------------------------------------------------------------------------------------------------------------------------------------------------------------------------------------------------------------------------------------------------------------------------------------------------------------------------------------------------------------------------------------------------------------------------------------------------------------------------------------------------------------------|----------------------------------------------------------------------------------------------------------------|------------------------------------------------------------------------------------------------------------------------------------------------------------------------------------------------------------------------------------------------------------------------------------------------------------------------------------------------------------------------------------------------------------------------------------------------------------------------------------------------------------------------------------------------------------------------------------------------------------------------------------------------------------------------------------------------------------------------------------------------------------------------------------------------------------------------------------------------------------------------------------------------------------------------------------------------------------------|-----------------|----|---------------|----------------|
| IL-15 | NCT01189383 | IL15 Dendritic Cell Vaccine for Patients With Resected Stage III (A, B or C) or Stage IV Melanoma                                                        | Completed | Malignant Melanoma Stage III Malignant Melanoma Stage IV                                                                                                                                                                                                                                                                                                                                                                                                                                                                            | Biological: IL15-DC Vaccine                                                                                    | Immune response Quality of elicited melanoma specific CD8+ T cells Breadth of melanoma specific immunity Longevity of melanoma specific CD8+ T cell immunity                                                                                                                                                                                                                                                                                                                                                                                                                                                                                                                                                                                                                                                                                                                                                                                                     | Phase 1 Phase 2 | 20 | Jan-11        | 22-Dec-16      |
| IL-15 | NCT02395822 | MT2014-25: Haplo NK With SQ IL-15 in Adult Relapsed or Refractory AML Patients                                                                           | Completed | Acute Myelogenous Leukemia                                                                                                                                                                                                                                                                                                                                                                                                                                                                                                          | Biological: IL-15                                                                                              | < 5% Marrow Blast, no Circulating Peripheral Blasts and Neutrophil Count of > 1 x 10 <sup>9</sup> /L In Vivo Expansion (>100) of NK Cells (Defined at CD56+/CD3-Lymphocytes) Proportion of Patients Experiencing Grade, 3, 4, and 5 Toxicities (Assessed by CTCAE v. 4) Treatment Related Mortality Number of Subjects Achieving Complete Response, Defined as in Vivo Donor Derived NK Cell Expansion of > 100 Donor Derived NK Cells.                                                                                                                                                                                                                                                                                                                                                                                                                                                                                                                          | Phase 2         | 17 | 1-Oct-15      | 20-Feb-18      |
| IL-15 | NCT01385423 | Haploidentical Donor Natural Killer Cell Infusion With IL-15 in Acute Myelogenous Leukemia (AML)                                                         | Completed | Acute Myelogenous Leukemia Myelodysplastic Syndrome                                                                                                                                                                                                                                                                                                                                                                                                                                                                                 | Drug: Preparative Regimen Biological: Intravenous Recombinant Human IL-15 (rhIL-15)                            | Maximum Tolerated/Minimum Efficacious Dose Incidence of Expansion of Natural Killer Cells Treatment Related Mortality (TRM) Rate of CRp                                                                                                                                                                                                                                                                                                                                                                                                                                                                                                                                                                                                                                                                                                                                                                                                                          | Phase 1         | 26 | Sep-11        | 2-Dec-17       |
| IL-15 | NCT01021059 | A Phase I Study of Intravenous Recombinant Human IL-15 in Adults With Refractory Metastatic Malignant Melanoma and Metastatic Renal Cell Cancer          | Completed | Melanoma Carcinoma, Renal Cell                                                                                                                                                                                                                                                                                                                                                                                                                                                                                                      | Biological: rh IL-15                                                                                           | Determine the safety, toxicity profile, dose-limiting toxicity and a maximum tolerated dose if IV recombinant Human IL-15 administered in melanoma and renal cell cancers.                                                                                                                                                                                                                                                                                                                                                                                                                                                                                                                                                                                                                                                                                                                                                                                       | Phase 1         | 18 | 10-Nov-09     | 8-Nov-19       |
| IL-15 | NCT01727076 | Recombinant Interleukin-15 in Treating Patients With Advanced Melanoma, Kidney Cancer, Non-small Cell Lung Cancer, or Squamous Cell Head and Neck Cancer | Completed | Head and Neck Squamous Cell Carcinoma Recurrent Head and Neck Carcinoma Recurrent Non-Small Cell Lung Carcinoma Recurrent Renal Cell Carcinoma Recurrent Skin Carcinoma Stage III Renal Cell Cancer Stage IIIA Cutaneous Melanoma AJCC v7 Stage IIIA Non-Small Cell Lung Cancer AJCC v7 Stage IIIB Cutaneous Melanoma AJCC v7 Stage IIIB Non-Small Cell Lung Cancer AJCC v7 Stage IIIC Cutaneous Melanoma AJCC v7 Stage IV Cutaneous Melanoma AJCC v6 and v7 Stage IV Non-Small Cell Lung Cancer AJCC v7 Stage IV Renal Cell Cancer | Other: Laboratory Biomarker Analysis Other: Pharmacological Study Biological: Recombinant Human Interleukin-15 | MTD defined as the next lower dose in which 1 or more patients experiences a dose limiting toxicity defined as grade 3 or 4 toxicity graded according to the NCI Common Terminology Criteria for Adverse Events version 4.0 ALC, monitored daily during treatment Change in NK cell function measured using flow cytometric analysis of cytokine (IFN-γ) secretion and expression of degranulation marker CD107a Change in presence of auto-antibodies, assessed by ELISA Change in T cell responses to non-physiologic stimuli including PMA Change in T cell subset response to recall viral antigens including CMV and influenza A virus, determined by enzyme-linked immunosorbent spot assay Change in total number of T cells and NK cells, as well as activated T cells, T cell subsets, and NK cell subsets, assessed by flow cytometric analysis of peripheral blood mononuclear cells ORR based on RECIST criteria Serum PK of IL15 and IL15 receptor- | Phase 1         | 20 | 15-Feb-13     | 15-Sep-17      |
| IL-15 | NCT01572493 | Continuous Infusion of rhIL-15 for Adults With Advanced Cancer                                                                                           | Completed | Lymphoma Carcinoma                                                                                                                                                                                                                                                                                                                                                                                                                                                                                                                  | Biological: rh IL-15 (10 DAYS) Biological: rh IL-15 (5 DAYS)                                                   | MTD and DLT Measure response rate Measure time to progression Measure PKs                                                                                                                                                                                                                                                                                                                                                                                                                                                                                                                                                                                                                                                                                                                                                                                                                                                                                        | Phase 1         | 38 | April 4, 2012 | 25-Sep-19      |
| IL-15 | NCT03127098 | QUILT-3.040: ETBX-011 (Ad5 [E1-, E2b]-CEA(6D)) Vaccine in Combination With ALT-803 (Super-agonist IL-15) in Subjects Having CEA-Expressing Cancer        | Completed | Thyroid Cancer Colon Cancer Ovarian Cancer Breast Cancer Lung Cancer Pancreatic Cancer                                                                                                                                                                                                                                                                                                                                                                                                                                              | Biological: ETBX-011 Biological: ALT-803                                                                       | Dose-limiting toxicities and maximum tolerated dose of the ETBX-011 plus ALT-803 combination treatment. (Phase 1b) Overall treatment-emergent AEs and SAEs [safety and tolerability] and preliminarily evaluate Objective response rate (ORR). (Phase 1) Preliminarily evaluate Duration of Response (DoR) Preliminarily evaluate Progressive-free survival (PFS) Preliminarily evaluate Overall Survival (OS)                                                                                                                                                                                                                                                                                                                                                                                                                                                                                                                                                   | Phase 1 Phase 2 | 3  | 26-Jun-17     | 28-Aug-19      |
| IL-15 | NCT01875601 | NK White Blood Cells and Interleukin in Children and Young Adults With Advanced Solid Tumors                                                             | Completed | Solid Tumors Brain Tumors Sarcoma Pediatric Cancers Neuroblastoma                                                                                                                                                                                                                                                                                                                                                                                                                                                                   | Biological: Recombinant human interleukin-15 (rhIL-15) Biological: NK Cell Infusion                            | Toxicity Feasibility Antitumor activity                                                                                                                                                                                                                                                                                                                                                                                                                                                                                                                                                                                                                                                                                                                                                                                                                                                                                                                          | Phase 1         | 16 | 11-Jun-13     | 21-Aug-19      |
| IL-15 | NCT01946789 | A Phase 1 Study of the Clinical and Immunologic Effects of ALT-803 in Patients With Advanced Solid                                                       | Completed | Advanced Solid Tumors                                                                                                                                                                                                                                                                                                                                                                                                                                                                                                               | Biological: ALT-803                                                                                            | Safety profile and effectiveness of escalating doses of ALT-803 To evaluate the effect of escalating doses of ALT-803                                                                                                                                                                                                                                                                                                                                                                                                                                                                                                                                                                                                                                                                                                                                                                                                                                            | Phase 1         | 26 | May-14        | April 17, 2019 |
| IL-15 | NCT00076180 | Hu-Mik-beta1 to Treat T-Cell Large Granular Lymphocytic Leukemia                                                                                         | Completed | T-Cell Large Granular Lymphocytic Leukemia Leukemia, T-Cell Large Granular Lymphocytic                                                                                                                                                                                                                                                                                                                                                                                                                                              | Biological: Hu-Mik-Beta-1                                                                                      | DLT and MTD of Hu MIK Beta 1                                                                                                                                                                                                                                                                                                                                                                                                                                                                                                                                                                                                                                                                                                                                                                                                                                                                                                                                     | Phase 1         | 9  | 1-Mar-04      | 11-Jan-19      |
| IL-15 | NCT02559674 | QUILT-2.001: ALT-803 in Patients With Advanced Pancreatic Cancer in Conjunction With Gemcitabine and Nab-Paclitaxel                                      | Completed | Advanced Pancreatic Cancer                                                                                                                                                                                                                                                                                                                                                                                                                                                                                                          | Biological: Gemcitabine Biological: Nab-paclitaxel Biological: ALT-803                                         | Determination of MTD; Phase 1b Safety Profile (Number and severity of treatment related AEs); Phase 1b and 1c Overall Survival; Phase 1c Objective response rate Duration of response Time to progression Progression-free survival Biomarkers; Phase 1b Determine the level of anti-ALT-803 antibodies in patient serum Area under the plasma concentration-time curve from time zero to infinity (AUC); Phase 1b Correlation between the level of circulating cell free DNA in patient plasma and response to study treatment Correlation between the level of tumor DNA in patient plasma and response to study treatment                                                                                                                                                                                                                                                                                                                                     | Phase 1         | 8  | Jul-16        | 27-Jan-20      |
| IL-15 | NCT01885897 | IL-15 Super Agonist ALT-803 to Treat Relapse Of Hematologic Malignancy After Allogeneic SCT                                                              | Completed | Acute Myelogenous Leukemia (AML) Acute Lymphoblastic Leukemia (ALL) Myelodysplastic Syndromes (MDS) Lymphoma Myeloma Chronic Lymphocytic Leukemia (CLL) Chronic Myelogenous                                                                                                                                                                                                                                                                                                                                                         | Biological: ALT-803                                                                                            | Number of Participants With Dose Limiting Toxicity (DLT) Events Number of Participants Experiencing Potential Efficacy of ALT 803 Number of Participants With Excessive Toxicity Number of Participants With Incidence of Acute Graft Versus Host Disease Number of Participants With Incidence of Chronic Graft Versus Host Disease                                                                                                                                                                                                                                                                                                                                                                                                                                                                                                                                                                                                                             | Phase 1 Phase 2 | 33 | 11-Nov-13     | 12-Aug-20      |
| IL-18 | NCT00659178 | Combination Study Of SB-485232 (Interleukin 18) And Doxil For Advanced Stage Epithelial Ovarian Cancer                                                   | Completed | Neoplasms, Ovarian                                                                                                                                                                                                                                                                                                                                                                                                                                                                                                                  | Drug: SB-485232 (interleukin 18), pegylated liposomal doxorubicin                                              | Safety and tolerability of SB-485232/Doxil combination therapy Biological activity of SB-485232/Doxil combination therapy Pharmacokinetic parameters for SB-485232 and Doxil: AUC(0-t), Cmax, and Cmin Pharmacodynamic biomarker responses Immunogenicity (anti-SB-485232 and anti-PEG antibodies) Anti-tumor activity (Radiographic tumor                                                                                                                                                                                                                                                                                                                                                                                                                                                                                                                                                                                                                       | Phase 1         | 15 | 18-Jun-08     | 21-Jul-17      |
| IL-18 | NCT01768338 | Recombinant Human IL-18 and Ofatumumab After PBSCT for Lymphoma                                                                                          | Completed | Non-Hodgkin's Lymphoma                                                                                                                                                                                                                                                                                                                                                                                                                                                                                                              | Drug: Ofatumumab combined with SB-485232                                                                       | To evaluate the the number of subjects with adverse events who receive SB-485232 when given in combination with ofatumumab To evaluate the biologic effects of SB-485232 given in combination with ofatumumab                                                                                                                                                                                                                                                                                                                                                                                                                                                                                                                                                                                                                                                                                                                                                    | Phase 1         | 9  | Feb-13        | 16-Aug-18      |

|       |             |                                                                                                                      |           |                                                                                                                                                                                                                          |                                                                                                                                                                                                        |                                                                                                                                                                                                                                                                                                                                                                                                                                                                                                                                                                                                                                                                                                                                                                                                                                                 |                 |     |            |           |
|-------|-------------|----------------------------------------------------------------------------------------------------------------------|-----------|--------------------------------------------------------------------------------------------------------------------------------------------------------------------------------------------------------------------------|--------------------------------------------------------------------------------------------------------------------------------------------------------------------------------------------------------|-------------------------------------------------------------------------------------------------------------------------------------------------------------------------------------------------------------------------------------------------------------------------------------------------------------------------------------------------------------------------------------------------------------------------------------------------------------------------------------------------------------------------------------------------------------------------------------------------------------------------------------------------------------------------------------------------------------------------------------------------------------------------------------------------------------------------------------------------|-----------------|-----|------------|-----------|
| IL-18 | NCT00500058 | A Phase I, Dose-Escalation Study to Assess the Safety and Biological Activity of Recombinant Human Interleukin-18    | Completed | Lymphoma, Non-Hodgkin                                                                                                                                                                                                    | Drug: SB-485232 Drug: Rituximab                                                                                                                                                                        | safety/tolerability of combination treatment for 4 weeks safety/tolerability of SB-485232 for additional 8 weeks assess blood values of combination treatment for 4 weeks assess blood values of SB-485232 for additional 8 weeks Pharmacokinetic parameters for SB-485232 and Rituxan: AUC <sub>tau</sub> , C <sub>max</sub> , and C <sub>min</sub>  Pharmacodynamic biomarker responses: Plasma IFN- $\gamma$ , GMCSF, IP-10, MIG, and MCP-1 changes Plasma IL-18BP change PBMC phenotype changes Activated NK cells (CD16+/CD56+/CD3-/CD69+/FasL+ or IL-18Ra+) Activated cytolytic T cells (CD8+/CD4-/CD3+/CD69+ FasL+ or IL-18Ra+) Activated B cells (CD19+/CD25-/CD3-/CD69+) Activated Neutrophils/Monocytes (CD11b+/CD16+/CD64+/CD14+/CD45+/CD69+) Regulatory T-cells (FoxP3+/CD25+/CD4+/CD127+) Immunogenicity (anti-SB-485232 and anti- | Phase 1         | 24  | 31-Jul-07  | 26-Jul-17 |
| IL-18 | NCT00107718 | Anti-Tumor Activity Of SB-485232 In Patients With Previously Untreated Metastatic Melanoma                           | Completed | Melanoma                                                                                                                                                                                                                 | Drug: SB-485232                                                                                                                                                                                        | Overall response rate of tumor Number of participants with progression free survival Response duration of SB-485232 for tumor treatment Time to response Number of participants with adverse events (AEs), serious adverse events (SAEs), and death. Change from Baseline In vital signs [systolic blood pressure (SBP), diastolic blood pressure (DBP), heart rate (HR), and body temperature(BT)] Number of participants with toxicity grade shift of clinical laboratory parameters over period. Number of participants                                                                                                                                                                                                                                                                                                                      | Phase 2         | 64  | 15-Nov-04  | 27-Jul-17 |
| IL-18 | NCT00085878 | Dose-Escalation Study Of SB-485232 Administered As Daily Subcutaneous Injections In Adults With Solid Tumors         | Completed | Solid Tumor Cancer                                                                                                                                                                                                       | Drug: SB-485232                                                                                                                                                                                        | - Safety and tolerability endpoints will include evaluation of adverse events and changes in laboratory values and clinical variables from pre-dose values. - Biologically effective dose based. - Pharmacokinetic endpoints: AUC, Adverse Events, c <sub>max</sub> , t <sub>max</sub> , and t1/2. - Presence or absence of anti-SB-485232 antibodies. - Pharmacodynamic endpoints. -                                                                                                                                                                                                                                                                                                                                                                                                                                                           | Phase 1         | 25  | Jan-03     | 16-Oct-08 |
| IL-18 | NCT00085904 | Dose-Escalating Study Of SB-485232 Administered Intravenously Every 28 Days To Adults With Solid Tumors Or Lymphomas | Completed | Solid Tumor Cancer Lymphoma                                                                                                                                                                                              | Drug: SB-485232                                                                                                                                                                                        | Evaluation of adverse events and changes in laboratory values. The potential dose is a dose regimen with no more than 2 out of 6 patients experiencing a dose-limiting toxicity. Evaluation for the presence of anti-SB-485232 antibodies, IL-18 neutralizing activity, and clinical sequelae. Pharmacokinetic endpoints are AUC, C <sub>max</sub> , C <sub>min</sub> , CL, V <sub>ss</sub> .                                                                                                                                                                                                                                                                                                                                                                                                                                                   | Phase 1         | 12  | April 2004 | 13-Oct-08 |
| IL-2  | NCT00539695 | Low Dose IL-2, Hematopoietic Stem Cell Transplantation, IL2 for GVHD                                                 | Completed | Acute Lymphoblastic Leukemia ALL Acute Myelogenous Leukemia AML Chronic Myelogenous Leukemia Myelodysplastic Syndrome Myeloproliferative Disorder Hodgkin Lymphoma Non-Hodgkin Lymphoma Non-malignant Diseases Requiring | Biological: IL-2                                                                                                                                                                                       | Rate of Dose Limiting Toxicities Rate of Severe (Grade III or IV) Acute GVHD Percentage Change in CD4+ CD25+ FoxP3+ Regulatory T Cells (Tregs) From Pre to Post IL-2 Infusions                                                                                                                                                                                                                                                                                                                                                                                                                                                                                                                                                                                                                                                                  | Phase 1 Phase 2 | 25  | Jun-07     | 4-May-18  |
| IL-2  | NCT00554515 | The High-Dose Aldesleukin (IL-2) "Select" Trial for Patients With Metastatic Renal Cell Carcinoma                    | Completed | Metastatic Renal Cell Carcinoma                                                                                                                                                                                          | Drug: HD IL2                                                                                                                                                                                           | Objective Response in ISM Good Risk Group Objective Response Rate in ISM Poor Risk Group Objective Response Rate (Independent Assessment) Overall Survival 3-Year Progression-Free Survival Rate Objective Response Rate by MSKCC Risk Group Objective Response Rate by UCLA SANI Score Objective Response Rate by Tumor Type Objective Response Rate by Clear Cell Histology Risk Group Objective Response Rate by CA-9 Score (CAIX Classification) Objective Response Rate by PD-L1 Tumor Objective Response Rate by B7-H3 Tumor Objective Response Rate by CA-9                                                                                                                                                                                                                                                                              | Early Phase 1   | 123 | Nov-06     | 2-Jan-20  |
| IL-2  | NCT00590824 | Pilot hu14.18-IL2 in Resectable Recurrent Stage III or Stage IV Melanoma                                             | Completed | Melanoma                                                                                                                                                                                                                 | Drug: hu14.18-IL2                                                                                                                                                                                      | Ganglioside Expressed by Tumor Cells (GD2) Recurrence Free Survival (RFS) Overall Survival (OS) C-Reactive Protein (CRP) Lymphocyte Count Anti-Idiotypic Antibodies Anti-Fc-IL2 Antibodies In Vitro Soluble Interleukin-2 (IL2) Receptor Alpha Levels                                                                                                                                                                                                                                                                                                                                                                                                                                                                                                                                                                                           | Phase 3         | 23  | 17-Dec-07  | 21-Nov-19 |
| IL-2  | NCT00082758 | hu14.18-Interleukin-2 Fusion Protein in Treating Young Patients With Recurrent or Refractory                         | Completed | Neuroblastoma                                                                                                                                                                                                            | Biological: hu14.18-Interleukin-2 fusion protein                                                                                                                                                       | Number of Responders (Response Rate)                                                                                                                                                                                                                                                                                                                                                                                                                                                                                                                                                                                                                                                                                                                                                                                                            | Phase 4         | 39  | Aug-05     | 12-Feb-15 |
| IL-2  | NCT00496860 | Safety and Efficacy Study of ALT-801 to Treat Progressive Metastatic Malignancies                                    | Completed | Progressive Metastatic Malignancies                                                                                                                                                                                      | Biological: ALT-801                                                                                                                                                                                    | The Safety and Toxicity of ALT-801 in Patients With Progressive Metastatic Malignancies The Maximum-tolerated Dose (MTD) of ALT-801 Clinical Antitumor Response to ALT-801 ALT-801 Induced Cell-mediated Immune                                                                                                                                                                                                                                                                                                                                                                                                                                                                                                                                                                                                                                 | Phase 3         | 26  | May-07     | 22-Jul-13 |
| IL-2  | NCT00425672 | ONTAK® in Treating Patients With Advanced Breast Cancer That Did Not Respond to Previous Treatment                   | Completed | Male Breast Cancer Recurrent Breast Cancer Stage IIIA Breast Cancer Stage IIIB Breast Cancer Stage IIIC Breast Cancer Stage IV Breast Cancer                                                                             | Biological: ONTAK Other: flow cytometry Other: immunohistochemistry staining method Other: enzyme-linked immunosorbent assay Other: laboratory biomarker analysis Genetic: protein expression analysis | Safety Evaluated by Collecting Study Related Toxicity as Assessed by CTCAE v3.0 Efficacy of ONTAK in Depleting T-regulatory Cells as a Decrease in Peripheral Blood Tregs Using Flow Cytometry Incidence of Interleukin-2 (IL-2) and IL-2 Receptor (IL-2R) Expression in Tumor Samples by Immunohistochemical (IHC) Analysis Presence of Circulating sIL-2R in the Peripheral Blood Presence of Endogenous Tumor-specific Immunity Anti-tumor Effects of ONTAK Determined by Tumor Response and Progression                                                                                                                                                                                                                                                                                                                                     | Phase 1 Phase 2 | 15  | Sep-05     | 5-Dec-18  |
| IL-2  | NCT00665470 | Chemotherapy Followed by gp100 Lymphocytes and Aldesleukin to Treat Melanoma                                         | Completed | Skin Cancer Metastatic Melanoma                                                                                                                                                                                          | Drug: Aldesleukin                                                                                                                                                                                      | Response Toxicity as Assessed by the National Cancer Institute (NCI) Common Terminology Criteria for Adverse Events (CTCAE) V3.0                                                                                                                                                                                                                                                                                                                                                                                                                                                                                                                                                                                                                                                                                                                | Phase 2         | 10  | April 2008 | 19-Oct-15 |
| IL-2  | NCT01124734 | High Dose Interleukin-2 Followed by Intermittent Low Dose Temozolomide in Patients With Melanoma                     | Completed | Malignant Melanoma                                                                                                                                                                                                       | Drug: Interleukin-2 Drug: Temozolomide                                                                                                                                                                 | Clinical Response to High-Dose Interleukin-2 (H-D IL-2) Followed by Low Dose Temozolomide Duration of Response to High-Dose Interleukin-2 (H-D IL-2) Followed by Low Dose Temozolomide Safety and Toxicity of H-D IL-2 Followed by Low Dose Temozolomide Effect of High Dose IL2 Followed by Low Dose Temozolomide on                                                                                                                                                                                                                                                                                                                                                                                                                                                                                                                           | Phase 2         | 17  | May-10     | 12-Feb-19 |
| IL-2  | NCT00328861 | Natural Killer Cells Plus IL-2 Following Chemotherapy to Treat Advanced Melanoma or Kidney                           | Completed | Metastatic Melanoma Metastatic Kidney Cancer                                                                                                                                                                             | Drug: Natural Killer (NK) Lymphocytes Biological: IL-2 Drug: Cyclophosphamide Drug: Fludarabine                                                                                                        | Objective Response Safety                                                                                                                                                                                                                                                                                                                                                                                                                                                                                                                                                                                                                                                                                                                                                                                                                       | Phase 2         | 8   | May-06     | 5-Nov-12  |

|      |             |                                                                                                                                                                                                     |           |                                                                                                                                             |                                                                                                                                                                                                                                                                               |                                                                                                                                                                                                                                                                                                                                                                                                                                                                                                                                                                                                                                                                                                                                                                                                                                                                   |                |     |            |                |
|------|-------------|-----------------------------------------------------------------------------------------------------------------------------------------------------------------------------------------------------|-----------|---------------------------------------------------------------------------------------------------------------------------------------------|-------------------------------------------------------------------------------------------------------------------------------------------------------------------------------------------------------------------------------------------------------------------------------|-------------------------------------------------------------------------------------------------------------------------------------------------------------------------------------------------------------------------------------------------------------------------------------------------------------------------------------------------------------------------------------------------------------------------------------------------------------------------------------------------------------------------------------------------------------------------------------------------------------------------------------------------------------------------------------------------------------------------------------------------------------------------------------------------------------------------------------------------------------------|----------------|-----|------------|----------------|
| IL-2 | NCT01550367 | Study of Hydroxychloroquine and Aldesleukin in Renal Cell Carcinoma Patients (RCC)                                                                                                                  | Completed | Metastatic Renal Cell Carcinoma                                                                                                             | Drug: Hydroxychloroquine Drug: IL-2                                                                                                                                                                                                                                           | Clinical Response - IL-2 Combined With Hydroxychloroquine (HCQ) at Either 1,200 mg/d or 600 mg/d (All Patients) Clinical Response - IL-2 Combined With Hydroxychloroquine (HCQ) at 1,200 mg/d Clinical Response - IL-2 Combined With Hydroxychloroquine (HCQ) at 600 mg/d Overall Survival (OS) Progression-free Survival (PFS) Number of Doses of IL-2 + HCQ Frequency of Grade III and Grade IV Toxicities Worst Grade of Adverse Event Experienced Worst Grade of Adverse Event At Least Possibly Related to Treatment Experienced Worst Grade of Adverse Event At Least Probably Related to Treatment Experienced Serum Lactate Dehydrogenase Hemoglobin Levels Serum Calcium Levels (Corrected) Prior Nephrectomy Number of Participants With Low Karnofsky Performance Status Natural Killer (NK) Cells Myeloid Derived Suppressor Cell (MDSC) Regulatory T | Phase 2        | 30  | Mar-12     | 2-Jan-20       |
| IL-2 | NCT00085423 | Cyclophosphamide, Fludarabine, and High-Dose Interleukin-2 in Treating Patients With Metastatic Melanoma                                                                                            | Completed | Melanoma (Skin)                                                                                                                             | Biological: aldesleukin Biological: filgrastim Biological: therapeutic tumor infiltrating lymphocytes Drug: cyclophosphamide Drug: fludarabine                                                                                                                                | Number of participants WITH OBJECTIVE RESPONSE AS MEASURED BY RECIST Number of Participants With Lymphocyte Recovery as Measured by Blood Count Time to Progression as Measured by RECIST                                                                                                                                                                                                                                                                                                                                                                                                                                                                                                                                                                                                                                                                         | Phase 2        | 20  | Feb-04     | April 10, 2013 |
| IL-2 | NCT00085436 | DC Vaccine Combined With IL-2 and IFN $\alpha$ -2a in Treating Patients With mRCC                                                                                                                   | Completed | Kidney Cancer                                                                                                                               | Biological: Aldesleukin Biological: autologous tumor cell vaccine Biological: recombinant interferon alfa                                                                                                                                                                     | Clinical Response as Measured by RECIST Immunity as Measured by T-cell and Antibody Responses to the Tumor                                                                                                                                                                                                                                                                                                                                                                                                                                                                                                                                                                                                                                                                                                                                                        | Phase 2        | 18  | Dec-03     | 26-Jun-18      |
| IL-2 | NCT00994643 | Safety and Efficacy Study of Immunotherapy With Rituximab and Interleukin-2 in Patients With Non-Hodgkin's Lymphoma                                                                                 | Completed | High Risk Non-Hodgkin's Lymphoma                                                                                                            | Biological: Rituximab Biological: Interleukin-2                                                                                                                                                                                                                               | Assess the Efficacy of Combination Immunotherapy With Rituximab and Interleukin-2 in Patients With Non-Hodgkin's Lymphoma                                                                                                                                                                                                                                                                                                                                                                                                                                                                                                                                                                                                                                                                                                                                         | Phase 2        | 11  | 5-Feb-09   | 4-May-18       |
| IL-2 | NCT00003222 | Vaccine Therapy Plus Interleukin-2 in Treating Patients With Stage III or Stage IV Melanoma                                                                                                         | Completed | Melanoma (Skin)                                                                                                                             | Biological: Aldesleukin Biological: gp100 Antigen Drug: Montanide ISA 51 VG Other: Quality-of-Life Assessment Other: Questionnaire Administration Other: Laboratory Biomarker Analysis                                                                                        | Evaluation of Objective Clinical Response (CR/PR/SD) Measure of Tumor-antigen-specific Immunity in Peripheral Blood Mononuclear Cells (PBMC) by Elispot Assay Measure of Tumor-antigen-specific Immunity in Sentinel Immunized Node (SIN) by Elispot Assay                                                                                                                                                                                                                                                                                                                                                                                                                                                                                                                                                                                                        | Phase 4        | 40  | April 1998 | 19-Dec-14      |
| IL-2 | NCT00314106 | Chemotherapy, Irradiation, Cell Infusions, and Interleukin-2 to Treat Metastatic Melanoma                                                                                                           | Completed | Metastatic Melanoma                                                                                                                         | Biological: Melanoma Reactive TIL Drug: Cyclophosphamide Biological: IL-2 Drug: Fludarabine Radiation: 1200 total body irradiation (TBI)                                                                                                                                      | Complete Response Number of Participants With Adverse Events                                                                                                                                                                                                                                                                                                                                                                                                                                                                                                                                                                                                                                                                                                                                                                                                      | Phase 2        | 26  | April 2006 | 18-Oct-12      |
| IL-2 | NCT00726739 | Aldesleukin With or Without Vaccine Therapy in Treating Patients With Stage IV Melanoma                                                                                                             | Completed | Stage IV Melanoma                                                                                                                           | Biological: aldesleukin Biological: allogeneic large multivalent immunogen vaccine                                                                                                                                                                                            | Median Time of Progression-free Survival Clinical Response of Lesion(s) Overall Survival at 2 Years Overall Survival at 1 Year Immune Response                                                                                                                                                                                                                                                                                                                                                                                                                                                                                                                                                                                                                                                                                                                    | Phase 3        | 21  | Jun-08     | 28-Dec-17      |
| IL-2 | NCT00337987 | A Pilot Study to Determine the Safety of the Combination of Ontak in Combination With CHOP in Peripheral T-Cell Lymphoma                                                                            | Completed | Peripheral T-Cell Lymphoma                                                                                                                  | Drug: Ontak Drug: CHOP (cyclophosphamide (C), adriamycin (H), vincristine (O), and prednisone (P)) chemotherapy                                                                                                                                                               | Number of Patients That Achieved a Complete Response or a Partial Response (PR) Number of Patients That Achieved a Complete Response (CR)                                                                                                                                                                                                                                                                                                                                                                                                                                                                                                                                                                                                                                                                                                                         | Phase 1        | 49  | Nov-05     | 27-Feb-15      |
| IL-2 | NCT01334515 | Biological Therapy, Sargramostim, and Isotretinoin in Treating Patients With Relapsed or Refractory                                                                                                 | Completed | Recurrent Neuroblastoma                                                                                                                     | Biological: hu14.18-IL2 fusion protein Drug: isotretinoin Biological: sargramostim Other: laboratory biomarker analysis                                                                                                                                                       | Number of Patients With Unacceptable Dose Limiting Toxicities (DLTs) Overall Response Evaluated in This Study Using the New International Criteria Proposed by the Revised Response Evaluation Criteria in Solid Tumors (RECIST)                                                                                                                                                                                                                                                                                                                                                                                                                                                                                                                                                                                                                                  | Phase 2        | 52  | Sep-11     | 21-Oct-19      |
| IL-2 | NCT01041638 | Monoclonal Antibody Ch14.18, Sargramostim, Aldesleukin, and Isotretinoin After Autologous Stem Cell Transplant in Treating Patients With Neuroblastoma                                              | Completed | Localized Resectable Neuroblastoma Localized Unresectable Neuroblastoma Regional Neuroblastoma Stage 4 Neuroblastoma Stage 4S Neuroblastoma | Biological: Aldesleukin Other: Diagnostic Laboratory Biomarker Analysis Biological: Dinutuximab Drug: Isotretinoin Biological: Sargramostim                                                                                                                                   | Percentage of Patients Who Experienced a Significant (CTC Grade 3-5) Nonhematologic Toxicity of Interest (Pain, Hypotension, Allergic Reactions, Capillary Leak Syndrome, or Fever) Event-free Survival (EFS) Overall Survival (OS)                                                                                                                                                                                                                                                                                                                                                                                                                                                                                                                                                                                                                               | Phase 2        | 105 | Dec-09     | 8-May-19       |
| IL-2 | NCT01105650 | Allogeneic Natural Killer (NK) Cells for Ovarian, Fallopian Tube, Peritoneal and Metastatic Breast                                                                                                  | Completed | Ovarian Cancer Fallopian Tube Cancer Primary Peritoneal Cancer Breast Cancer                                                                | Drug: Fludarabine Drug: Cyclophosphamide Drug: Cyclosporine Biological: Natural killer                                                                                                                                                                                        | Response Rate Time to Disease Progression Number of Participants With Progressive Disease at One Year Overall Survival                                                                                                                                                                                                                                                                                                                                                                                                                                                                                                                                                                                                                                                                                                                                            | Phase 2        | 13  | Jul-10     | 28-Dec-17      |
| IL-2 | NCT00059475 | Peptide Vaccination for Patients at High Risk for Recurrent Melanoma                                                                                                                                | Completed | Melanoma                                                                                                                                    | Drug: Glycoprotein 100 (GP100): 209-217 (210M) Drug: Interleukin-2 (IL-2) Drug: Montanide ISA 51 Drug: Melanoma antigen recognized by T-cells (MART)-1: 27-35 Drug: 27-35 (27L): melanoma antigen recognized by T-cells (MART)-1 Drug: melanoma antigen recognized by T-cells | Immunologic Response Rate Response Rate Number of Participants With Adverse Events                                                                                                                                                                                                                                                                                                                                                                                                                                                                                                                                                                                                                                                                                                                                                                                | Not Applicable | 138 | April 2003 | 23-Oct-12      |
| IL-2 | NCT00096382 | Cyclophosphamide, Fludarabine, and Total-Body Irradiation Followed By Cellular Adoptive Immunotherapy, Autologous Stem Cell Transplantation, and Interleukin-2 in Treating Patients With Metastatic | Completed | Melanoma (Skin)                                                                                                                             | Biological: aldesleukin Biological: filgrastim Biological: therapeutic tumor infiltrating lymphocytes Drug: cyclophosphamide Drug: fludarabine phosphate Radiation: radiation therapy                                                                                         | Clinical Tumor Regression Safety                                                                                                                                                                                                                                                                                                                                                                                                                                                                                                                                                                                                                                                                                                                                                                                                                                  | Not Applicable | 34  | Sep-04     | 28-Oct-15      |
| IL-2 | NCT00126490 | Bevacizumab and Interleukin-2 in Treating Patients With Metastatic Kidney Cancer                                                                                                                    | Completed | Recurrent Renal Cell Carcinoma Stage IV Renal Cell Cancer                                                                                   | Biological: Aldesleukin Biological: Bevacizumab Other: Laboratory Biomarker Analysis                                                                                                                                                                                          | Number of Evaluable Participants With Complete Response (CR) and Partial Response (PR) at One Year Number of Evaluable Participants With Overall Survival (OS) at 2 Years Number of Evaluable Participants With Progression Free Survival (PFS) Pearson Correlation Coefficients of Dendritic Cell (DC):Immature Cell (ImC) Ratio With DC Function Number of Participants With Possibly Related Serious Adverse Events (SAEs)                                                                                                                                                                                                                                                                                                                                                                                                                                     | Phase 2        | 19  | Mar-05     | 30-Jun-15      |

|      |             |                                                                                                                                                                                                    |           |                                                                                                                                                                                                                                                                                                                                                                                         |                                                                                                                                                                                                                             |                                                                                                                                                                                                                                                                                                                                                              |         |     |           |           |
|------|-------------|----------------------------------------------------------------------------------------------------------------------------------------------------------------------------------------------------|-----------|-----------------------------------------------------------------------------------------------------------------------------------------------------------------------------------------------------------------------------------------------------------------------------------------------------------------------------------------------------------------------------------------|-----------------------------------------------------------------------------------------------------------------------------------------------------------------------------------------------------------------------------|--------------------------------------------------------------------------------------------------------------------------------------------------------------------------------------------------------------------------------------------------------------------------------------------------------------------------------------------------------------|---------|-----|-----------|-----------|
| IL-2 | NCT0006244  | Melphalan, Peripheral Stem Cell Transplantation, and Interleukin-2 Followed by Interferon Alfa in Treating Patients With Advanced                                                                  | Completed | Refractory Multiple Myeloma Stage I Multiple Myeloma Stage II Multiple Myeloma Stage III Multiple Myeloma                                                                                                                                                                                                                                                                               | Drug: melphalan Biological: recombinant interferon alfa Biological: aldesleukin Procedure: in vitro-treated peripheral blood stem cell transplantation                                                                      | Overall Survival Initial Response to Therapy Time to Disease Progression Proportion of Patients Alive and in Remission Number of Patients <56 Years Old Experiencing Grade 3-4 Regimen Related Toxicity Number of Patients ≥56 Years Old Experiencing Grade 3-4 Regimen Related Toxicity                                                                     | Phase 2 | 36  | Feb-00    | 12-Jul-17 |
| IL-2 | NCT00019682 | Aldesleukin With or Without Vaccine Therapy in Treating Patients With Locally Advanced or Metastatic Melanoma                                                                                      | Completed | Recurrent Melanoma Stage IIIA Skin Melanoma Stage IIIB Skin Melanoma Stage IIIC Skin Melanoma Stage IVD Skin Melanoma                                                                                                                                                                                                                                                                   | Biological: Aldesleukin Biological: gp100 Antigen Drug: Montanide ISA 51 VG Other: Quality-of-Life Assessment Other: Questionnaire Administration Other: Laboratory Biomarker Analysis                                      | Best Response Rate (Partial Response [PR] + Complete Response [CR]) Progression Free Survival Change in T-cell Precursors Change in Quality of Life (QOL) Score Assessed by the FACT-G (Functional Assessment of Cancer Therapy- General), FACT-F (Functional Assessment of Cancer Therapy- Fatigue), SF-36 (Short Form 36) and SDS (Symptom Distress Scale) | Phase 4 | 185 | Dec-99    | 20-Nov-17 |
| IL-2 | NCT00923195 | Radiation, Chemotherapy, Vaccine and Anti-MART-1 and Anti-gp100 Cells for Patients With Metastatic Melanoma                                                                                        | Completed | Melanoma Skin Cancer                                                                                                                                                                                                                                                                                                                                                                    | Drug: MART-1: 26-35(27L) Peptide Drug: Montanide ISA 51 VG Drug: gp100:154-162 Peptide Procedure: Radiation Drug: Aldesleukin Drug: Fludarabine Drug: Cyclophosphamide Genetic: Anti-gp100:154 TCR PBL Genetic: Anti-MART-1 | Complete Response Rates for Patients With Metastatic Melanoma Toxicity Profile                                                                                                                                                                                                                                                                               | Phase 2 | 4   | Dec-08    | 28-Oct-15 |
| IL-2 | NCT00509288 | Phase II Study of Metastatic Melanoma With Lymphodepleting Conditioning and Infusion of Anti-MART-1 F5 TCR-Gene-Engineered Lymphocytes                                                             | Completed | Melanoma Skin Cancer                                                                                                                                                                                                                                                                                                                                                                    | Biological: autologous anti-MART-1 F5 T-cell receptor Drug: Cyclophosphamide Drug: Fludarabine Biological: Aldesleukin Biological: autologous anti-MART-1 F5 T-cell receptor gene-engineered tumor infiltrating lymphocytes | Clinical Tumor Regression Toxicity                                                                                                                                                                                                                                                                                                                           | Phase 2 | 24  | Jun-07    | 28-Dec-12 |
| IL-2 | NCT01258855 | Aldesleukin With or Without Ziv-Afibcept in Treating Patients With Stage III-IV Melanoma That Cannot Be Removed by Surgery                                                                         | Completed | Metastatic Melanoma Recurrent Melanoma Stage III Cutaneous Melanoma AJCC v7 Stage IIIA Cutaneous Melanoma AJCC v7 Stage IIIB Cutaneous Melanoma AJCC v7 Stage IIIC Cutaneous Melanoma AJCC v7 Stage IVD Cutaneous Melanoma AJCC v6 and v7                                                                                                                                               | Biological: Aldesleukin Other: Laboratory Biomarker Analysis Biological: Ziv-Afibcept                                                                                                                                       | Progression-free Survival Overall Survival Response Rate Count of Participants With Adverse Events Progression-free Survival for Patients With High Vascular Endothelial Growth Factor (VEGF) Levels Progression-free Survival for Patients With Low VEGF Levels                                                                                             | Phase 4 | 84  | 18-Jan-11 | 10-May-19 |
| IL-2 | NCT01592045 | ch14.18 Pharmacokinetic Study in High-risk Neuroblastoma                                                                                                                                           | Completed | Neuroblastoma                                                                                                                                                                                                                                                                                                                                                                           | Biological: ch14.18 -NCI Biological: ch14.18-UTC Biological: Granulocyte-Macrophage Colony-Stimulating Factor (GM-CSF) Biological: Aldesleukin (IL-                                                                         | Area Under the Plasma Concentration Curve (AUC) Peak Plasma Concentration (Cmax)                                                                                                                                                                                                                                                                             | Phase 2 | 28  | Aug-12    | 23-Sep-15 |
| IL-2 | NCT00025662 | Selective T-Cell Depletion to Reduce GVHD (Patients) Receiving Stem Cell Tx to Treat Leukemia, Lymphoma or MDS                                                                                     | Completed | Graft vs Host Disease Myelodysplastic Syndromes Leukemia Leukemia, Myeloid Leukemia, Myelomonocytic, Chronic Leukemia, Lymphocytic Lymphoma Lymphoma, Mantle-cell Lymphoma, Non-Hodgkin Hodgkin Disease                                                                                                                                                                                 | Drug: RFT5-SMPT-dgA Drug: Isolex system                                                                                                                                                                                     | Treatment-related Mortality Overall Survival Cumulative Non Relapse Mortality                                                                                                                                                                                                                                                                                | Phase 2 | 23  | May-01    | 28-Oct-16 |
| IL-2 | NCT02379195 | Peginterferon and TIL Therapy for Metastatic Melanoma                                                                                                                                              | Completed | Metastatic Melanoma                                                                                                                                                                                                                                                                                                                                                                     | Drug: Cyclophosphamide Drug: Fludarabine Biological: TIL infusion Drug: Interleukin-2 Drug: Peginterferon alfa-2b                                                                                                           | Number of Participants With Adverse Events/Serious Adverse Events Treatment Related Immune Responses Objective Response Rate Overall Survival Progression Free Survival                                                                                                                                                                                      | Phase 4 | 12  | Nov-14    | 22-Jan-20 |
| IL-2 | NCT01370213 | NK Cell Based Non-Myeloablative Transplantation in Acute Myeloid Diseases                                                                                                                          | Completed | Acute Myeloid Leukemia Myelodysplastic Syndrome                                                                                                                                                                                                                                                                                                                                         | Drug: Preparative Regimen Biological: NK Cells Drug: Interleukin-2 Biological: CD34 Graft/Anti-thymocyte globulin Biological: Donor TCR αβ-depleted Graft/ATG                                                               | Number of Participants With Donor Neutrophil Engraftment Number of Participants With Disease Free Survival Number of Participants With Treatment Related Mortality (TRM) Number of Participants Who Relapsed Number of Participants With Early In Vivo Expansion of Natural Killer (NK) Cells                                                                | Phase 4 | 25  | Sep-11    | 16-Dec-19 |
| IL-2 | NCT00003875 | Busulfan and Etoposide Followed by Peripheral Blood Stem Cell Transplant and Low-Dose Aldesleukin in Treating Patients With Acute Myeloid Leukemia                                                 | Completed | Adult Acute Myeloid Leukemia in Remission Adult Acute Myeloid Leukemia With 11q23 (MLL) Abnormalities Adult Acute Myeloid Leukemia With Del(5q) Adult Acute Myeloid Leukemia With t(15;17)(q22;q12) Adult Acute Myeloid Leukemia With t(16;16)(p13;q22) Childhood Acute Myeloid Leukemia in Remission Recurrent Adult Acute Myeloid Leukemia Recurrent Childhood Acute Myeloid Leukemia | Drug: busulfan Drug: etoposide Biological: aldesleukin Procedure: peripheral blood stem cell transplantation                                                                                                                | Overall Survival of Patients on Busulfan and Etoposide Followed by Stem Cell Rescue and Aldesleukin Toxicity Associated With High-dose Busulfan and Etoposide Followed by Stem Cell Rescue Toxicity Associated With Aldesleukin Treatment After Stem Cell Rescue Proportion of Patients Who Relapsed Associated With the Regimen                             | Phase 2 | 30  | 13-Oct-98 | 5-Jun-17  |
| IL-2 | NCT00001832 | Lymphocyte Re-infusion During Immune Suppression to Treat Metastatic Melanoma                                                                                                                      | Completed | Melanoma Neoplasm Metastasis                                                                                                                                                                                                                                                                                                                                                            | Drug: gp100:209-217 (210M) Drug: Montanide ISA-51 Drug: IL-2 Drug: MART-1:26-35(27L) Biological: Abl cells Drug: Fludarabine Drug: Cyclophosphamide Biological: GCSF (Growth colony stimulating                             | Clinical Response Number of Participants With Adverse Events                                                                                                                                                                                                                                                                                                 | Phase 2 | 170 | Aug-99    | 21-Dec-12 |
| IL-2 | NCT00003199 | Combination Chemotherapy and Peripheral Blood Stem Cell Transplant Followed By Aldesleukin and Sargramostim in Treating Patients With Inflammatory Stage IIIB or Metastatic Stage IV Breast Cancer | Completed | Estrogen Receptor-negative Breast Cancer Estrogen Receptor-positive Breast Cancer Inflammatory Breast Cancer Male Breast Cancer Progesterone Receptor-negative Breast Cancer Progesterone Receptor-positive Breast Cancer Stage IIIB Breast Cancer Stage IV Breast Cancer                                                                                                               | Drug: tamoxifen citrate Drug: busulfan Drug: thiotepal Drug: melphalan Biological: aldesleukin Biological: sargramostim Procedure: peripheral blood stem cell transplantation Radiation: radiation therapy                  | Event-free Survival Overall Survival Number of Participants With Toxicity of a Combination of Low-dose IL-2 and GM-CSF                                                                                                                                                                                                                                       | Phase 2 | 50  | Nov-97    | 12-Jul-17 |



|      |             |                                                                                                                                                                                                                                                       |           |                                                                                                                                                                     |                                                                                                                                                                                                                                             |                                                                                                                                                                                                                                                                                                                                                                                                                                                                                                                                                                                         |                 |      |            |                |
|------|-------------|-------------------------------------------------------------------------------------------------------------------------------------------------------------------------------------------------------------------------------------------------------|-----------|---------------------------------------------------------------------------------------------------------------------------------------------------------------------|---------------------------------------------------------------------------------------------------------------------------------------------------------------------------------------------------------------------------------------------|-----------------------------------------------------------------------------------------------------------------------------------------------------------------------------------------------------------------------------------------------------------------------------------------------------------------------------------------------------------------------------------------------------------------------------------------------------------------------------------------------------------------------------------------------------------------------------------------|-----------------|------|------------|----------------|
| IL-2 | NCT00439465 | Adoptive Cellular Immunotherapy Following Autologous Peripheral Blood Stem Cell Transplantation for Multiple Myeloma                                                                                                                                  | Completed | Myeloma Transplant-eligible Patients                                                                                                                                | Biological: Ex vivo Expanded Human Autologous Polyclonal Regulatory T Cells                                                                                                                                                                 | Number of Participants With Adverse Events in All Subjects Count of Participants With Increased CD3+CD8+, CD8+ and CD56+ Concentrations Between Day 15 Post-Transplant and Days 21 to 28 Post-transplant Time to Recovery of Absolute Neutrophil Count Time to Recovery of Platelet Count Assessment of Disease Response to Treatment Number of Participants With Increased Expression of DAP10 and NKG2D on the CD8 Cell Population Determine the Methods of Tumor Cell Killing of the in Vivo CD8+ Cells: Cytotoxicity Assays, Blocking Experiments, Analysis of T-cell Receptor (TCR | Phase 2         | 23   | Jan-07     | 26-Mar-19      |
| IL-2 | NCT00187096 | Natural Killer (NK) Cell Transplantation for AML                                                                                                                                                                                                      | Completed | Acute Myeloid Leukemia                                                                                                                                              | Drug: Cyclophosphamide, Fludarabine, Clofarabine, Etoposide, Interleukin-2 Procedure: Natural Killer Cell Infusion Device: CliniMACS System                                                                                                 | Number of Patients Experiencing Grade 3 or 4 Toxicities During Conditioning and up to 100 Days Post-transplant Proportion of Patients Experiencing Grade 3 or 4 Toxicities During Conditioning and up to 100 Days Post-transplant Duration of Engraftment of Natural Killer (NK) Cells Percent of Peak NK Cell Chimerism Percent of Detectable Donor NK Cells at Day 28 Day That Maximum NK Cell Engraftment Was Reached Number of KIR-mismatched NK Cells Number of Participants With Evidence of NK Cells Lysing a                                                                    | Phase 1 Phase 2 | 49   | Sep-05     | 19-Jun-14      |
| IL-2 | NCT01181258 | Penostatin, Rituximab and Ontak and Allogeneic Natural Killer (NK) Cells for Refractory Lymphoid Malignancies                                                                                                                                         | Completed | Non-Hodgkin Lymphoma Chronic Lymphocytic Leukemia                                                                                                                   | Drug: Rituximab Biological: Interleukin-2 Biological: Natural killer cells Drug: Cyclophosphamide Drug: Methylprednisolone Drug: Fludarabine                                                                                                | Number of Patients With an Objective Response Serious Adverse Events Time to Disease Progression Patients With Expansion of NK Cells                                                                                                                                                                                                                                                                                                                                                                                                                                                    | Phase 1         | 16   | Aug-10     | 6-Feb-18       |
| IL-2 | NCT00513604 | Phase II Study of Short-Term Cultured Anti-Tumor Autologous Lymphocytes After Lymphocyte-Depleting Chemotherapy in                                                                                                                                    | Completed | Melanoma Malignant Melanoma Melanoma, Experimental Experimental Melanomas                                                                                           | Biological: aldesleukin Biological: therapeutic autologous lymphocytes Drug: Cyclophosphamide Drug: Fludarabine phosphate Radiation: Total body irradiation                                                                                 | Clinical Response Toxicity                                                                                                                                                                                                                                                                                                                                                                                                                                                                                                                                                              | Phase 2         | 158  | Jun-07     | 3-Jun-13       |
| IL-2 | NCT02280811 | T Cell Receptor Immunotherapy Targeting HPV-16 E6 for HPV-Associated Cancers                                                                                                                                                                          | Completed | Vaginal Cancer Cervical Cancer Anal Cancer Penile Cancer Oropharyngeal Cancer                                                                                       | Drug: Fludarabine Drug: Cyclophosphamide Biological: TCR Drug: Aldesleukin                                                                                                                                                                  | Maximum Tolerated Dose (MTD) Objective Tumor Response Rate (Complete or Partial Response) Duration of Response Number of Participants With Serious and Non-serious Adverse Events Number of Participants With a Dose Limiting Toxicity (DLT) Percentage of Cluster of Differentiation 3 (CD3+) Cells That Are E6 T-Cell Receptor Memory of Circulating T-Cells in Responders and Non-responders Expression of Programmed Cell Death 1 (PD-1) by Circulating E6 T-Cell Receptor (TCR) T-Cells                                                                                            | Phase 1 Phase 2 | 12   | 14-Oct-14  | 6-Sep-17       |
| IL-2 | NCT00001941 | Anti-Tac for Treatment of Leukemia                                                                                                                                                                                                                    | Completed | HTLV-I Infection T Cell Leukemia                                                                                                                                    | Biological: daclizumab                                                                                                                                                                                                                      | Duration of Response Overall Survival Percentage of Participants With an Overall Response Rate Number of Participants With Adverse Events                                                                                                                                                                                                                                                                                                                                                                                                                                               | Phase 2         | 34   | Dec-99     | 20-Aug-12      |
| IL-2 | NCT00274846 | Donor Peripheral Stem Cell Transplant in Treating Patients With Relapsed Acute Myeloid Leukemia                                                                                                                                                       | Completed | Leukemia                                                                                                                                                            | Biological: aldesleukin Biological: therapeutic allogeneic lymphocytes Drug: cyclophosphamide Drug: fludarabine phosphate Procedure: in vitro treated peripheral blood stem cell transplantation                                            | Number of Patients With Natural Killer (NK) Cell Expansion Number of Patients With Complete Remission Median Time to Disease Relapse (Months) Overall Survival Time of Patients With Complete Remission Number of Patients With Complete Remission and Natural Killer Cell Expansion                                                                                                                                                                                                                                                                                                    | Phase 2         | 21   | Mar-05     | 28-Dec-17      |
| IL-2 | NCT01118091 | Prospective Randomized Comparative Study of Cell Transfer Therapy Using CD8+-Enriched Short-Term Cultured Anti-Tumor Autologous Lymphocytes Following a Non-Myeloablative Lymphocyte Depleting Chemotherapy Regimen Compared to High-Dose Aldesleukin | Completed | Skin Cancer Melanoma Metastatic Melanoma                                                                                                                            | Biological: Aldesleukin Biological: CD8 enriched Young TIL                                                                                                                                                                                  | Response Rate Progression Free Survival Toxicity                                                                                                                                                                                                                                                                                                                                                                                                                                                                                                                                        | Phase 2         | 12   | April 2010 | 8-Oct-15       |
| IL-2 | NCT00303667 | Donor Natural Killer Cells and Aldesleukin in Treating Patients w/High Risk AML Undergoing Donor Stem Cell Transplant                                                                                                                                 | Completed | Acute Myelogenous Leukemia                                                                                                                                          | Biological: aldesleukin Biological: natural killer cells Drug: cyclophosphamide Drug: fludarabine phosphate Procedure: allogeneic hematopoietic stem cell transplantation Radiation: total body irradiation Biological: Thymoglobulin Drug: | Disease-free Survival at 6 Months Disease-free Survival at 1 Year In Vivo Expansion of a Donor NK Cells NK Cell Product Number of Patients With Graft Failure Incidence of Grade III-IV Acute Graft Versus Host Disease Number of Patients With Treatment-Related Mortality Incidence of Chronic Graft Versus Host Disease Number of Patients With Disease Relapse Incidence of Post-transplant Lymphoproliferative Disorder (PTLD)                                                                                                                                                     | Not Applicable  | 50   | Jan-05     | 28-Dec-17      |
| IL-2 | NCT00853021 | Bevacizumab and Aldesleukin in Treating Patients With Metastatic Clear Cell Carcinoma of the Kidney                                                                                                                                                   | Completed | Kidney Cancer                                                                                                                                                       | Biological: aldesleukin Biological: bevacizumab                                                                                                                                                                                             | Progression Free Survival Objective Response Rate (Complete and Partial Response) Percentage of Patients With Constitutional Adverse Events Percentage of Patients With Neutropenia                                                                                                                                                                                                                                                                                                                                                                                                     | Phase 2         | 26   | Dec-05     | 5-Jun-19       |
| IL-2 | NCT00460109 | Rituximab and Denileukin Diftitox in Treating Patients With Previously Untreated Stage III or Stage IV Follicular B-Cell Non-Hodgkin's                                                                                                                | Completed | Lymphoma                                                                                                                                                            | Biological: denileukin diftitox Biological: rituximab                                                                                                                                                                                       | Proportion of Confirmed Tumor Response (Complete Response [CR], Unconfirmed CR, and Partial Response) Survival Time Time to Disease Progression Duration of Response Time to Subsequent Therapy                                                                                                                                                                                                                                                                                                                                                                                         | Phase 2         | 24   | April 2008 | April 18, 2017 |
| IL-2 | NCT00026312 | Isotretinoin With or Without Dinutuximab, Aldesleukin, and Sargramostim Following Stem Cell Transplant in Treating Patients With Neuroblastoma                                                                                                        | Completed | Localized Resectable Neuroblastoma Localized Unresectable Neuroblastoma Recurrent Neuroblastoma Regional Neuroblastoma Stage 4 Neuroblastoma Stage 4S Neuroblastoma | Biological: Aldesleukin Biological: Dinutuximab Drug: Isotretinoin Other: Laboratory Biomarker Analysis Other: Pharmacological Study Other: Quality-of-Life Assessment Biological: Sargramostim                                             | Event-Free Survival (EFS) Event-Free Survival (EFS) of Patients From the Non-randomized Portion of the Trial Incidence of Toxicities Assessed Using Common Terminology Criteria for Adverse Events Version 4.0 Number of Courses of Therapy Delivered Overall Survival (OS) Overall Survival (OS) of Patients From the Non-randomized Portion of the Trial                                                                                                                                                                                                                              | Phase 4         | 1449 | Oct-01     | 10-May-17      |
| IL-2 | NCT01585428 | Immunotherapy Using Tumor Infiltrating Lymphocytes for Patients With Metastatic Human Papillomavirus-Associated Cancers                                                                                                                               | Completed | Cervical Cancer Oropharyngeal Cancer Vaginal Cancer Anal Cancer Penile Cancer                                                                                       | Drug: Fludarabine Drug: Cyclophosphamide Biological: Young TIL Drug: Aldesleukin                                                                                                                                                            | Number of Participants With an Objective Clinical Response Number of Patients With Serious and Non-serious Adverse Events                                                                                                                                                                                                                                                                                                                                                                                                                                                               | Phase 2         | 29   | April 2012 | 13, 7-Mar-18   |

|      |             |                                                                                                                                                               |           |                                                                                                                                                                                                |                                                                                                                                                                                                                                                                                                                                                                                                                                                                           |                                                                                                                                                                                                                                                                                                                                                                                                                                                                                                                                                                                                                                                                                                                                                                                                                                                                                                                                                                                            |                 |     |            |           |
|------|-------------|---------------------------------------------------------------------------------------------------------------------------------------------------------------|-----------|------------------------------------------------------------------------------------------------------------------------------------------------------------------------------------------------|---------------------------------------------------------------------------------------------------------------------------------------------------------------------------------------------------------------------------------------------------------------------------------------------------------------------------------------------------------------------------------------------------------------------------------------------------------------------------|--------------------------------------------------------------------------------------------------------------------------------------------------------------------------------------------------------------------------------------------------------------------------------------------------------------------------------------------------------------------------------------------------------------------------------------------------------------------------------------------------------------------------------------------------------------------------------------------------------------------------------------------------------------------------------------------------------------------------------------------------------------------------------------------------------------------------------------------------------------------------------------------------------------------------------------------------------------------------------------------|-----------------|-----|------------|-----------|
| IL-2 | NCT00245037 | Busulfan, Fludarabine, and Total-Body Irradiation in Treating Patients Who Are Undergoing a Donor Stem Cell Transplant for Hematologic Cancer                 | Completed | Chronic Myeloproliferative Disorders Leukemia Lymphoma Multiple Myeloma and Plasma Cell Neoplasm Myelodysplastic Syndromes Myelodysplastic/Myeloproliferative Neoplasms Precancerous Condition | Biological: therapeutic allogeneic lymphocytes Drug: busulfan Drug: cyclosporine Drug: fludarabine phosphate Drug: mycophenolate mofetil Procedure: peripheral blood stem cell transplantation Radiation: Total Body Irradiation (TBI) Drug: Granulocyte colony-stimulating factor (G-CSF) Drug: Drug: Fludarabine Drug: Busulfan Procedure: NK cell infusion; Drug: Interleukin-2 Drug: Anti-Thymocyte Globulin Procedure: Allogeneic related Stem Cell Transplant Drug: | Regimen-Related Toxicities Non-relapse Mortality Overall Survival Progression-Free Survival Relapse Mortality Acute Graft-Versus-Host Disease (aGVHD) Outcome Chronic Graft-Versus-Host Disease (cGVHD) Outcome                                                                                                                                                                                                                                                                                                                                                                                                                                                                                                                                                                                                                                                                                                                                                                            | Phase 1 Phase 2 | 147 | Jun-05     | 27-Sep-17 |
| IL-2 | NCT01390402 | Alloreactive Haploidentical Natural Killer (NK) Cells With Busulfan and Fludarabine/ATG                                                                       | Completed | Leukemia Chronic Myelogenous Leukemia                                                                                                                                                          | Drug: Busulfan Procedure: NK cell infusion; Drug: Interleukin-2 Drug: Anti-Thymocyte Globulin Procedure: Allogeneic related Stem Cell Transplant Drug:                                                                                                                                                                                                                                                                                                                    | Number of Participants With Molecular Complete Remission at 3 Month Post Transplant                                                                                                                                                                                                                                                                                                                                                                                                                                                                                                                                                                                                                                                                                                                                                                                                                                                                                                        | Phase 2         | 6   | Jan-12     | 3-Feb-16  |
| IL-2 | NCT01454596 | CAR T Cell Receptor Immunotherapy Targeting EGFRvIII for Patients With Malignant Gliomas Expressing EGFRvIII                                                  | Completed | Malignant Glioma Glioblastoma Brain Cancer Gliosarcoma                                                                                                                                         | Biological: Epidermal growth factor receptor(EGFRv)III Chimeric antigen receptor (CAR) transduced PBL Drug: Aldesleukin Drug: Fludarabine Drug:                                                                                                                                                                                                                                                                                                                           | Number of Treatment Related Adverse Events Progression Free Survival Number of Patients With an Objective Response Circulating Chimeric Antigen Receptor (CAR+) Cells in Peripheral Blood at 1 Month Post Treatment Number of Participants With Serious and Non-serious Adverse Events Assessed by the Common Terminology Criteria in Adverse                                                                                                                                                                                                                                                                                                                                                                                                                                                                                                                                                                                                                                              | Phase 1 Phase 2 | 18  | 16-May-12  | 21-Aug-19 |
| IL-2 | NCT00006237 | S0008: Chemotherapy Plus Biological Therapy in Treating Patients With Melanoma                                                                                | Completed | Melanoma (Skin)                                                                                                                                                                                | Biological: interleukin-2 Biological: filgrastim Biological: interferon alfa Drug: cisplatin Drug: dacarbazine Drug:                                                                                                                                                                                                                                                                                                                                                      | 5-year Overall Survival 5-year Relapse-Free Survival Toxicity                                                                                                                                                                                                                                                                                                                                                                                                                                                                                                                                                                                                                                                                                                                                                                                                                                                                                                                              | Phase 3         | 432 | Aug-00     | 25-Mar-15 |
| IL-2 | NCT02151903 | Open-Label Extension Study of De-immunized DI-Leu16-IL2 Immunocytokine Administered in                                                                        | Completed | B-cell Non-Hodgkin Lymphoma                                                                                                                                                                    | Drug: DI-Leu16-IL2                                                                                                                                                                                                                                                                                                                                                                                                                                                        | Tumor response in patients Safety assessment in patients monitoring adverse events Safety assessment in patients monitoring clinical laboratory tests Safety assessment in patients monitoring physical exams                                                                                                                                                                                                                                                                                                                                                                                                                                                                                                                                                                                                                                                                                                                                                                              | Phase 1 Phase 2 | 5   | Nov-14     | 17-Mar-17 |
| IL-2 | NCT02076633 | Intratumoral Administration of L19IL2/L19TNF                                                                                                                  | Completed | Malignant Melanoma, Skin                                                                                                                                                                       | Drug: L19IL2+L19TNF                                                                                                                                                                                                                                                                                                                                                                                                                                                       | Rate of patients with complete response (CR) of L19IL2 treated Index/Non-Index lesions at week 12. Efficacy of L19IL2/L19TNF treated Index/non treated lesions Overall survival (OS) Safety of the combination treatment with L19IL2 and L19TNF                                                                                                                                                                                                                                                                                                                                                                                                                                                                                                                                                                                                                                                                                                                                            | Phase 2         | 21  | Dec-12     | 27-May-15 |
| IL-2 | NCT01058538 | A Dose Finding Pharmacokinetic Study of the Tumour-targeting Human L19IL2 Monoclonal Antibody-Cytokine Fusion Protein in Patients With Advanced Solid Tumours | Completed | Advanced Solid Tumours                                                                                                                                                                         | Drug: L19IL2                                                                                                                                                                                                                                                                                                                                                                                                                                                              | To determine the maximum tolerated dose (MTD) and recommended dose (RD) of the human L19IL2 fusion-cytokine. To determine the pharmacokinetic profile. To determine the qualitative and quantitative toxicity profile. To assess the presence of anti-fusion protein antibodies in treated patients. To evaluate the safety profile of repeated administrations of L19IL2 in patients treated at the RD. To identify early signs of antitumour activity.                                                                                                                                                                                                                                                                                                                                                                                                                                                                                                                                   | Phase 1 Phase 2 | 33  | Nov-05     | 25-Feb-14 |
| IL-2 | NCT01253096 | Intratumoral Application of L19IL2 in Patients With Malignant Melanoma                                                                                        | Completed | Malignant Melanoma                                                                                                                                                                             | Drug: Intratumoral injections of L19IL2                                                                                                                                                                                                                                                                                                                                                                                                                                   | Rate of patients with complete response (CR) of L19IL2 treated Index/Non-Index lesions at week 12. Safety of intratumoral administration of L19IL2 Rate of patients with complete response (CR), partial response (PR) and stable disease (SD) of L19IL2 treated Index/Non-Index lesions at week 12. Duration of objective response and disease control of L19IL2 treated Index/Non-Index lesions Overall survival (OS) Rate of patients with complete response (CR), partial response (PR) and stable disease (SD) of all metastases Objective response rate of all metastases Disease control rate of all metastases                                                                                                                                                                                                                                                                                                                                                                     | Phase 2         | 25  | April 2010 | 20-Nov-14 |
| IL-2 | NCT02086721 | Phase I Clinical Study Combining L19-IL2 With SABR in Patients With Oligometastatic Solid Tumor                                                               | Completed | Solid Tumour                                                                                                                                                                                   | Drug: L19-IL2                                                                                                                                                                                                                                                                                                                                                                                                                                                             | Toxicity (CTCAE 4.0) Progression-Free survival Local control rate non-invasive response evaluation using PET Quality of life Correlation of outcome measures with PET-imaging correlation of outcome measures with immunological markers in tumor                                                                                                                                                                                                                                                                                                                                                                                                                                                                                                                                                                                                                                                                                                                                          | Phase 1         | 18  | Dec-15     | 31-May-17 |
| IL-2 | NCT00200577 | Tumor Infiltrating Lymphocytes Adjuvant Therapy of Melanoma                                                                                                   | Completed | Melanoma                                                                                                                                                                                       | Drug: TIL + IL2                                                                                                                                                                                                                                                                                                                                                                                                                                                           | Determination of the duration of the relapse-free interval. Physical examination, every 2 months until M18 then every 3 months until M36 then every 4 months up to 5 years, then once per year with a clinical examination only. Abdominal echography will be performed at the screening visit, M4, M8, M12 and then every 6 months until 5ans. CT-Scan will be performed before the first administration of study treatment (at the time of screening visit), every 6 months during 2 years and then every years up to 5 years. Determine of overall survival To define safety and toxicity of TIL/IL2 treatment Evaluation of immunological responses Analysis of the clinical, biological and histological factors on the survival of the Minimal residual disease (MRD) in AML patients receiving Ceplene/IL-2 Pharmacodynamic effects of Ceplene plus low dose IL-2 (Ceplene/IL-2) by monitoring T and NK cell phenotypes and their functionality after the first and third cycles of | Phase 3         | 70  | May-05     | 1-Jun-17  |
| IL-2 | NCT01347996 | Maintenance Therapy With Ceplene® (Histamine) and IL-2 on Immune Response and MRD in Acute Myeloid                                                            | Completed | Acute Myeloid Leukemia                                                                                                                                                                         | Drug: histamine dihydrochloride and IL-2                                                                                                                                                                                                                                                                                                                                                                                                                                  | Objective response rate and duration of response by clinical exam and radiology studies after every 2 courses Adverse events by clinical assessment daily during treatment and weekly after completion of study treatment Immunologic activation induced by hu14.18-interleukin-2 after every 2 courses Induction of anti-idiotypic antibodies on days 1, 3, 4,                                                                                                                                                                                                                                                                                                                                                                                                                                                                                                                                                                                                                            | Phase 4         | 84  | Jul-09     | 29-Nov-17 |
| IL-2 | NCT00109863 | Hu14.18-Interleukin-2 Fusion Protein in Treating Patients With Advanced Melanoma                                                                              | Completed | Melanoma (Skin)                                                                                                                                                                                | Biological: hu14.18-IL2 fusion protein                                                                                                                                                                                                                                                                                                                                                                                                                                    | Objective response rate and duration of response by clinical exam and radiology studies after every 2 courses Adverse events by clinical assessment daily during treatment and weekly after completion of study treatment Immunologic activation induced by hu14.18-interleukin-2 after every 2 courses Induction of anti-idiotypic antibodies on days 1, 3, 4,                                                                                                                                                                                                                                                                                                                                                                                                                                                                                                                                                                                                                            | Phase 2         | 14  | May-05     | 19-Nov-19 |
| IL-2 | NCT00003126 | Interleukin-2 in Treating Patients With Stage III or Stage IV Kidney Cancer                                                                                   | Completed | Kidney Cancer                                                                                                                                                                                  | Drug: Interleukin-2                                                                                                                                                                                                                                                                                                                                                                                                                                                       | Disease free survival Overall survival                                                                                                                                                                                                                                                                                                                                                                                                                                                                                                                                                                                                                                                                                                                                                                                                                                                                                                                                                     | Phase 3         | 69  | Jun-97     | 4-Jan-17  |
| IL-2 | NCT00100906 | Sequential ATRA Then IL-2 for Modulation of Dendritic Cells and Treatment of Metastatic Renal Cell                                                            | Completed | Kidney Cancer                                                                                                                                                                                  | Drug: IL-2 Drug: ATRA                                                                                                                                                                                                                                                                                                                                                                                                                                                     | Ratio of Dendritic Cells (DC) to Circulating Immature Cells (ImC) Before and After Treatment Frequency of Treatment-Related Side Effects Overall Response Rate (ORR)                                                                                                                                                                                                                                                                                                                                                                                                                                                                                                                                                                                                                                                                                                                                                                                                                       | Phase 2         | 18  | Aug-04     | 16-Aug-13 |

|      |             |                                                                                                                                                                                                                                                                           |           |                                                                                                                                     |                                                                                                                                                                                                                                     |                                                                                                                                                                                                                                                                                                                                                                                                                                                                                                                                             |                 |     |            |                |
|------|-------------|---------------------------------------------------------------------------------------------------------------------------------------------------------------------------------------------------------------------------------------------------------------------------|-----------|-------------------------------------------------------------------------------------------------------------------------------------|-------------------------------------------------------------------------------------------------------------------------------------------------------------------------------------------------------------------------------------|---------------------------------------------------------------------------------------------------------------------------------------------------------------------------------------------------------------------------------------------------------------------------------------------------------------------------------------------------------------------------------------------------------------------------------------------------------------------------------------------------------------------------------------------|-----------------|-----|------------|----------------|
| IL-2 | NCT00458679 | Treatment of B-Chronic Lymphocytic Leukemia (B-CLL) With Autologous CD40 Ligand and IL-2-Expressing                                                                                                                                                                       | Completed | Chronic Lymphocytic Leukemia (CLL)                                                                                                  | Biological: CD40 LIGAND AND IL-2-EXPRESSING TUMOR CELLS VACCINE                                                                                                                                                                     | To measure adverse events of patients receiving prolonged immunization with an autologous B-CLL vaccine expressing CD40L and IL2 Measurement of MHC-restricted or unrestricted anti-tumor immune responses                                                                                                                                                                                                                                                                                                                                  | Phase 1         | 6   | Dec-06     | 3-Feb-14       |
| IL-2 | NCT00952237 | Immune Mobilization of Autologous Peripheral Blood Stem Cells Using Interleukin-2 and GM-CSF                                                                                                                                                                              | Completed | Non-Hodgkin's Lymphoma Hodgkin's Disease Multiple Myeloma Other Plasma Cell Dyscrasia (Waldenstrom, Amyloidosis) Leukemia           | Drug: GM-CSF Drug: IL-2                                                                                                                                                                                                             | Can IL-2 be administered with GM-CSF to efficiently mobilize autologous peripheral blood stem cells. This study will determine the maximum tolerated dose of IL-2 and the optimal biological dose with GM-CSF for stem cell mobilization. Will immune-mobilized stem cell products be well tolerated once infused into patients and will engraft normally following.                                                                                                                                                                        | Phase 1         | 13  | Jan-03     | April 25, 2018 |
| IL-2 | NCT00928902 | Trial for the Evaluation of the Effect of Systemic Low-dose Interleukin-2 (IL-2) on the Immunogenicity of a Vaccine Comprising Synthetic Melanoma Peptides Administered With Granulocyte-macrophage Colony-stimulating Factor (GM-CSF)-In-Adjuvant, in Patients With High | Completed | Melanoma                                                                                                                            | Drug: low-dose IL-2 Biological: melanoma vaccine                                                                                                                                                                                    | To evaluate the effect of systemic low-dose IL-2 on the immunogenicity of a vaccine comprising synthetic melanoma peptides plus GM-CSF-in-adjuvant. Changes in disease, analysis of melanoma antigen (gp100, tyrosinase, MART-1) expression on melanoma cells from metastatic sites, Vitiligo.                                                                                                                                                                                                                                              | Phase 2         | 41  | Nov-99     | 21-Oct-10      |
| IL-2 | NCT00031564 | Phase II Study of a B7-1 Gene-Modified Autologous Tumor Cell Vaccine and Systemic IL-2                                                                                                                                                                                    | Completed | Kidney Cancer                                                                                                                       | Biological: Interleukin-2 Biological: B7-1                                                                                                                                                                                          | Percentage of Patients Who Have a Reduction in the Size of Their Measurable Metastatic Tumors                                                                                                                                                                                                                                                                                                                                                                                                                                               | Phase 2         | 49  | May-00     | 27-Sep-12      |
| IL-2 | NCT00415818 | Immunotherapy With TG4010 in Patients With Advanced Non-Small Cell Lung Cancer                                                                                                                                                                                            | Completed | Carcinoma, Non-Small-Cell Lung                                                                                                      | Biological: MVA-MUC1-IL2 Drug: 1st line Chemotherapy                                                                                                                                                                                | Progression free survival at 6 months Response Rate according to WHO criteria Time to progression Overall survival Quality of life                                                                                                                                                                                                                                                                                                                                                                                                          | Phase 2 Phase 3 | 148 | Dec-05     | 16-Jul-14      |
| IL-2 | NCT01176552 | Granulocyte-macrophage Colony-stimulating Factor, Interferon and Interleukin-2 as Adjuvant Treatment for Renal Cancer                                                                                                                                                     | Completed | Renal Cell Carcinoma                                                                                                                | Drug: GM-CSF, IFN alpha and IL-2                                                                                                                                                                                                    | Disease-free survival (DFS) Progression rate Overall survival (OS) Number of Participants with Adverse Events as a Measure of Safety and Tolerability                                                                                                                                                                                                                                                                                                                                                                                       | Phase 2         | 35  | May-04     | 24-Aug-10      |
| IL-2 | NCT02226861 | Ultra-Low Dose IL-2 Therapy as GVHD Prophylaxis in Haploidentical Allogeneic Stem Cell Transplantation                                                                                                                                                                    | Completed | Acute Lymphoblastic Leukemia (ALL) Acute Myelogenous Leukemia (AML) Chronic Lymphocytic Leukemia (CLL) Chronic Myelogenous Leukemia | Device: CliniMACS CD34 selection system Biological: ULD IL-2                                                                                                                                                                        | Safety of ULD IL-2 as GVHD proph                                                                                                                                                                                                                                                                                                                                                                                                                                                                                                            | Phase 1         | 24  | 26-Aug-14  | 5-Jul-18       |
| IL-2 | NCT00003750 | Biological Therapy in Treating Children With Refractory or Recurrent Neuroblastoma or Other                                                                                                                                                                               | Completed | Melanoma (Skin) Neuroblastoma Sarcoma Unspecified Childhood Solid Tumor, Protocol Specific                                          | Biological: hu14.18-IL2 fusion protein                                                                                                                                                                                              | Determine the MTD and pharmacokinetics of hu14.18-IL2 fusion protein Assess immunological changes associated with fusion protein therapy                                                                                                                                                                                                                                                                                                                                                                                                    | Phase 1         | 28  | Oct-01     | 8-Aug-14       |
| IL-2 | NCT00058786 | Treatment of Chronic Lymphocytic B-Leukemia With IL-2 and CD-40 Autologous Tumor Cells                                                                                                                                                                                    | Completed | Chronic Lymphocytic B-Leukemia                                                                                                      | Biological: Injection of IL-2-secreting CD40L-expressing autologous B-CLL cells                                                                                                                                                     | Safety of 3-6 SQ injections of autologous malignant B cells from chronic B-CLL pts, which have been modified ex vivo to secrete human interleukin-2 (hIL-2) and to express human CD40 ligand (hCD40L). To determine whether MHC- restricted or unrestricted anti-tumor immune responses are induced by SC injections of B-CLL cells which have been modified ex vivo to secrete hIL-2 and to express hCD40L To obtain preliminary data on the anti-                                                                                         | Phase 1         | 9   | Dec-02     | 23-May-12      |
| IL-2 | NCT01603212 | Systemic Therapy With Interferon, Interleukin-2 and BRAF Inhibitor                                                                                                                                                                                                        | Completed | Melanoma                                                                                                                            | Drug: Vemurafenib Drug: IL-2 Drug: Interferon Alpha-2b                                                                                                                                                                              | Maximum Tolerated Dose (MTD) of Vemurafenib in Combination With Interferon Alpha 2b and IL-2 Progression-Free Survival (PFS)                                                                                                                                                                                                                                                                                                                                                                                                                | Phase 1         | 6   | 18-Jul-13  | 21-May-19      |
| IL-2 | NCT00083941 | A Study of TroVax Vaccine Given in Conjunction With IL-2 for Treatment of Stage IV Renal Cell Cancer                                                                                                                                                                      | Completed | Carcinoma, Renal Cell                                                                                                               | Biological: TroVax in combination with IL-2                                                                                                                                                                                         | safety                                                                                                                                                                                                                                                                                                                                                                                                                                                                                                                                      | Phase 2         | 25  | Aug-04     | 29-Jun-11      |
| IL-2 | NCT00203879 | Study of MAGE-3/Melan-A/gp100/NA17 and rhIL-12 With/Out Low Dose IL-2 in Metastatic Melanoma                                                                                                                                                                              | Completed | Metastatic Melanoma                                                                                                                 | Drug: MAGE-3/Melan-A/gp100/NA PBMC, rhIL-12 (drug) Drug: MAGE-3/Melan-A/gp100/NA17 Peptide-pulsed autologous PBMC, rhIL-12 with IL-2                                                                                                | The primary hypothesis is immunization of patients with 4 melanoma antigen peptides will induce augmented specific IFN- $\gamma$ -producing CD8+ T cells against all 4 antigens simultaneously, and to determine the clinical response rate.                                                                                                                                                                                                                                                                                                | Phase 2         | 19  | Feb-02     | 5-Sep-13       |
| IL-2 | NCT00276835 | Genistein and Interleukin-2 in Treating Patients With Metastatic Melanoma or Kidney Cancer                                                                                                                                                                                | Completed | Kidney Cancer Melanoma (Skin)                                                                                                       | Biological: High-dose interleukin-2 Dietary Supplement: genistein                                                                                                                                                                   | Differences in peak and duration of the expansion of circulating CD4+, CD8+, and CD4+, CD25+, and CD56+ cells (dim and bright) Circulating plasma levels of TGF-beta                                                                                                                                                                                                                                                                                                                                                                        | Early Phase 1   | 15  | Nov-05     | April 10, 2015 |
| IL-2 | NCT00609401 | Study Comparing Association Between Sorafenib and Interleukin-2 (IL-2) Versus Sorafenib in 1st Line Therapy in Advanced (Adv) Renal                                                                                                                                       | Completed | Metastatic Disease Renal Cell Carcinoma                                                                                             | Drug: Nexavar (Sorafenib) Drug: IL-2                                                                                                                                                                                                | PFS                                                                                                                                                                                                                                                                                                                                                                                                                                                                                                                                         | Phase 2         | 90  | Nov-06     | 26-Feb-09      |
| IL-2 | NCT01874288 | Phase I/II Study of De-immunized DI-Leu16-IL2 Immunocytokine Administered Subcutaneously in Patients With B-cell NHL                                                                                                                                                      | Completed | B-cell Non-Hodgkin Lymphoma                                                                                                         | Drug: 0.5 mg/m2 DI-Leu16-IL2 Drug: 1.0 mg/m2 DI-Leu16-IL2 Drug: 2.0 mg/m2 DI-Leu16-IL2 Drug: 4.0 mg/m2 DI-Leu16-IL2 Drug: 6.0 mg/m2 DI-Leu16-IL2 Drug: 8.0 mg/m2 DI-Leu16-IL2 Drug: 10.0 mg/m2 DI-Leu16-IL2 Drug: 50mg/m2 Rituximab | Maximum tolerated dose of DI-Leu16-IL2 Evaluate immunogenicity                                                                                                                                                                                                                                                                                                                                                                                                                                                                              | Phase 1 Phase 2 | 24  | Jul-13     | 17-Jan-18      |
| IL-2 | NCT00278369 | Pilot Study of Denileukin Diftitox Plus High-Dose IL-2 for Patients With Metastatic Renal Cancer                                                                                                                                                                          | Completed | Kidney Cancer                                                                                                                       | Biological: aldesleukin Biological: denileukin diftitox                                                                                                                                                                             | The primary objective is to assess for toxicity The secondary objectives are to investigate differences in peak and duration of the expansion of CD4+, CD8+, CD4+CD 25+ and CD56+(dim and bright)CD25+ cells To investigate the effects of denileukin diftitox in combination with IL-2 on plasma TGF-beta levels To perform TGF-beta promoter and TGF-beta receptor genotyping prior to the start of treatment to search for variants that may be associated with tumor response to therapy. Overall response rate and time to progression | Early Phase 1   | 20  | April 2005 | 22-May-13      |

|      |             |                                                                                                                                                                                                                                                                    |           |                                                                                                                                                          |                                                                                                                      |                                                                                                                                                                                                                                                                                                                                                                                                                                                                         |                 |     |           |           |
|------|-------------|--------------------------------------------------------------------------------------------------------------------------------------------------------------------------------------------------------------------------------------------------------------------|-----------|----------------------------------------------------------------------------------------------------------------------------------------------------------|----------------------------------------------------------------------------------------------------------------------|-------------------------------------------------------------------------------------------------------------------------------------------------------------------------------------------------------------------------------------------------------------------------------------------------------------------------------------------------------------------------------------------------------------------------------------------------------------------------|-----------------|-----|-----------|-----------|
| IL-2 | NCT0002994  | Interleukin-2 Plus Monoclonal Antibody Therapy in Treating Patients With Solid Tumors                                                                                                                                                                              | Completed | Unspecified Adult Solid Tumor, Protocol Specific                                                                                                         | Biological: interleukin 2 Biological: rhuMAB                                                                         | Toxicity In vitro cytotoxicity Lymphocyte phenotyping Anti tumor response                                                                                                                                                                                                                                                                                                                                                                                               | Phase 1         | 355 | Jul-97    | 28-Jun-16 |
| IL-2 | NCT00223899 | A Trial to Evaluate the Safety of Intratumoral VCL-IM01 Followed by Electroporation in Metastatic                                                                                                                                                                  | Completed | Metastatic Melanoma                                                                                                                                      | Genetic: VCL-IM01 (encoding IL-2) with Electroporation                                                               | Safety of intratumorally injected VCL-IM01 followed by electroporation in subjects with recurrent metastatic melanoma Overall response rate, duration of response, treated tumor response rate, assessment of injected tumor(s) for induration, inflammation, and                                                                                                                                                                                                       | Phase 1         | 26  | Jul-05    | 27-Feb-19 |
| IL-2 | NCT00005604 | Interleukin-12 Plus Interleukin-2 in Treating Patients With Advanced                                                                                                                                                                                               | Completed | Unspecified Adult Solid Tumor, Protocol Specific                                                                                                         | Biological: recombinant interleukin-12 Biological: aldesleukin Other: laboratory                                     | MTD defined as the dose level that is just below the dose on which at least 2 of 6 patients developed a dose-limiting toxicity (DLT) as assessed by CTC version 2.0                                                                                                                                                                                                                                                                                                     | Phase 1         | 25  | Mar-00    | 1-Feb-13  |
| IL-2 | NCT00277017 | Combination Therapy With 5-Fluorouracil, Interferon- $\alpha$ Interleukin-2, & Thalidomide for Metastatic, Advanced or Recurrent Interleukin-2 in Treating Children Who Have Undergone Bone Marrow Transplantation for Acute Myeloid Leukemia                      | Completed | Kidney Cancer                                                                                                                                            | Drug: 5-Fluorouracil, Interferon- $\alpha$ , IL-2 and Thalidomide                                                    | Evaluate a therapy combining the established FUNIL regimen with Thalidomide.                                                                                                                                                                                                                                                                                                                                                                                            | Phase 1 Phase 2 | 15  | Sep-00    | 27-Sep-11 |
| IL-2 | NCT00009698 | Interleukin-2 in Treating Children Who Have Undergone Bone Marrow Transplantation for Acute Myeloid Leukemia                                                                                                                                                       | Completed | Leukemia                                                                                                                                                 | Biological: aldesleukin                                                                                              | To determine the maximum tolerated dose (MTD) of IL-2                                                                                                                                                                                                                                                                                                                                                                                                                   | Phase 1         | 1   | Mar-98    | 28-Jun-13 |
| IL-2 | NCT01672450 | A Study of Intratumoral Injection of Interleukin-2 and Ipilimumab in Patients With Unresectable Stages                                                                                                                                                             | Completed | Melanoma                                                                                                                                                 | Drug: Intratumoral Ipilimumab and Interleukin-2                                                                      | Number of Adverse Events per patient Starting and Ending measurements of treated lesions Starting and ending measurement of untreated lesions                                                                                                                                                                                                                                                                                                                           | Phase 1         | 12  | Sep-12    | 8-Jul-15  |
| IL-2 | NCT00283829 | Immunotherapy After Chemotherapy for Patients With Hormone Refractory Metastatic Prostate                                                                                                                                                                          | Completed | Prostate Cancer                                                                                                                                          | Drug: docetaxel Drug: IL2                                                                                            | To determine the feasibility of sequencing low dose SQ IL-2 with chemotherapy in patients with hormone refractory prostate cancer (HRPC) in an outpatient setting. To determine the impact of docetaxel on the natural immune defense system in patients before IL-2                                                                                                                                                                                                    | Phase 1 Phase 2 | 30  | Sep-02    | 29-Nov-07 |
| IL-2 | NCT00204581 | Intralesional Treatment With Interleukin-2 (Proleukin) in Soft Tissue Melanoma Metastases                                                                                                                                                                          | Completed | Melanoma                                                                                                                                                 | Drug: Interleukin-2 (Proleukin)                                                                                      | Efficacy in regard to complete and partial response Overall survival Side-effects                                                                                                                                                                                                                                                                                                                                                                                       | Phase 2         | 51  | Aug-03    | 19-Aug-11 |
| IL-2 | NCT00502034 | Low-dose IL-2 Plus IFN- $\alpha$ Immunotherapy as Adjuvant Treatment of Renal Carcinoma.                                                                                                                                                                           | Completed | Carcinoma, Renal Cell                                                                                                                                    | Drug: Interferon Alfa-2a Drug: Interleukin-2                                                                         | Recurrence-free survival: loco-regional, adrenal, kidney and distant-metastases were the events considered for event-free survival. Tolerability, toxicity and safety.                                                                                                                                                                                                                                                                                                  | Phase 3         | 310 | Jul-94    | 10-Jul-13 |
| IL-2 | NCT00078520 | Treatment of B-CLL With Human IL-2 and CD40 Ligand and Plasmid Gene Modified Autologous Tumor Cells                                                                                                                                                                | Completed | Leukemia Leukemia, B-Cell, Chronic                                                                                                                       | Biological: Dose Level 1 Biological: Dose Level 2 Biological: Dose Level 2- Fixed Dose                               | safety of injections of autologous malignant B cells from B-CLL patients, which have been modified to secrete hIL-2 and hCD40L. anti-tumor immune responses obtain preliminary data on the anti-tumor effects of this treatment regimen.                                                                                                                                                                                                                                | Phase 1         | 9   | Jan-03    | 21-Jan-20 |
| IL-2 | NCT00058799 | Treating High Risk Leukemia With CD40 Ligand & IL-2 Gene Modified Tumor Vaccine                                                                                                                                                                                    | Completed | Leukemia                                                                                                                                                 | Biological: Dose Level 1 Biological: Dose Level 2 Biological: Dose Level 3                                           | • To determine the safety of up to six subcutaneous (SC) injections of autologous tumor cells admixed with autologous gene-modified skin fibroblasts. These fibroblasts are modified ex vivo to express the human CD40 Ligand (hCD40L) and interleukin-2 (hIL-2).                                                                                                                                                                                                       | Phase 1         | 11  | Jun-99    | 21-Jan-20 |
| IL-2 | NCT01480323 | A Phase II Study to Evaluate Safety and Efficacy of Combined Treatment With Ipilimumab and Intratumoral Interleukin-2                                                                                                                                              | Completed | Malignant Melanoma                                                                                                                                       | Drug: Interleukin-2 Drug: Ipilimumab                                                                                 | Control rate Tolerability Overall survival Best Overall Response Rate Overall response rate Overall Response Rate Response rate of injected metastases only Rate of patients with substantial increase of anti-melanoma T-cells in peripheral blood during treatment Changes in T-cell subsets during treatment Changes in subsets of tumor-                                                                                                                            | Phase 2         | 15  | Feb-12    | 21-Jul-15 |
| IL-2 | NCT01278940 | Trial of Vaccine Therapy With mRNA-Transfected Dendritic Cells in Patients With Advanced Malignant                                                                                                                                                                 | Completed | Malignant Melanoma                                                                                                                                       | Biological: Dendritic Cells (DC) malignant melanoma Procedure: IL-2                                                  | Determination of safety and toxicity of vaccination with patients' tumour mRNA transfected DCs Determine immunological response to the vaccine (induction of specific T-cell response) Assessment of tumour response.                                                                                                                                                                                                                                                   | Phase 1 Phase 2 | 31  | Mar-02    | 15-Aug-16 |
| IL-2 | NCT00912418 | Pilot Study for the Evaluation of the Efficacy of Vaccination With Autologous Tumor Cells Plus Granulocyte-macrophage Colony-stimulating Factor (GM-CSF) - in - Adjuvant, Followed by Systemic Low-dose-interleukin-2 (IL-2) Administration, in Patients With High | Completed | Melanoma                                                                                                                                                 | Biological: autologous tumor cells plus GM-CSF-in Adjuvant                                                           | Cytotoxic T-cell response to autologous tumor (as measured by staining assay) Cytotoxic T-cell response to defined melanoma antigens. 1: Activation antigen expression by lymph node T-cells 2: Delayed-type hypersensitivity response to autologous tumor cells. 3: Antibody response to autologous tumor cells.                                                                                                                                                       | Not Applicable  | 14  | Jan-00    | 19-Jun-13 |
| IL-2 | NCT01883323 | Tumor-Infiltrating Lymphocytes And Low-Dose Interleukin-2 Therapy Following Cyclophosphamide And Fludarabine In Patients With                                                                                                                                      | Completed | Metastatic, Stage III or Stage IV, Melanoma                                                                                                              | Drug: Cyclophosphamide Drug: Fludarabine Biological: Tumor-Infiltrating Lymphocytes Biological: Low-Dose Interleukin | Clinical response to treatment Number occurrences and severity of side effects Number of patients with an immunity and no immunity to the study treatment                                                                                                                                                                                                                                                                                                               | Phase 2         | 12  | Jun-13    | 8-Nov-19  |
| IL-2 | NCT01671774 | Safety and Activity of IMAB362 in Combination With Zoledronic Acid and Interleukin-2 in CLDN18.2-positive Gastric Cancer                                                                                                                                           | Completed | CLDN18.2-positive Gastric Adenocarcinoma CLDN18.2-positive Adenocarcinoma of the Gastroesophageal Junction CLDN18.2-positive Adenocarcinoma of Esophagus | Drug: IMAB362 Drug: Zoledronic acid Drug: Interleukin-2 (1 million IU) Drug: Interleukin-2 (3 million IU)            | Safety and Tolerability Immune cell profile and kinetics Progression-free survival (PFS) Objective tumor response rate (ORR) Disease control rate (DCR) Duration of response (DOR)                                                                                                                                                                                                                                                                                      | Phase 1         | 32  | 16-Oct-12 | 18-Oct-19 |
| IL-2 | NCT00019448 | Vaccine Therapy With or Without Interleukin-2 in Treating Patients With Metastatic Melanoma                                                                                                                                                                        | Completed | Stage IV Melanoma Recurrent Melanoma                                                                                                                     | Drug: gp100 antigen Drug: interleukin-2                                                                              |                                                                                                                                                                                                                                                                                                                                                                                                                                                                         | Phase 2         |     | Sep-98    | 20-Jun-13 |
| IL-2 | NCT00136448 | High Dose Ara-C (HDAC) and Interleukin-2 (IL-2) for Patients With Acute Myelogenous Leukemia (AML)                                                                                                                                                                 | Completed | Acute Myelogenous Leukemia                                                                                                                               | Drug: cytosine arabinoside (ara-C) Drug: daunomycin Drug: interleukin-2                                              | The primary purpose of this study is to evaluate the ability of IL-2 to generate cytotoxic and inhibitory activity against cryopreserved autologous leukemic myeloblasts obtained at the time of diagnosis. To evaluate the safety of continuous infusion IL-2 with intermittent IL-2 boluses in patients with AML who have received 3 cycles of post-remission intensification therapy with high-dose ara-C To assess additional immunologic effects of IL-2 To obtain | Phase 2         | 30  | Feb-93    | 10-Mar-11 |

|      |             |                                                                                                                                                                                                   |           |                                                                                                                                                                                                                                                                                                                                                                                                                                                                                   |                                                                                                                                                                                                                                                                                                     |                                                                                                                                                                                                                                                                                                                                                                                                                                                                                                                                                                                                                                                                                                                                                 |               |     |            |           |
|------|-------------|---------------------------------------------------------------------------------------------------------------------------------------------------------------------------------------------------|-----------|-----------------------------------------------------------------------------------------------------------------------------------------------------------------------------------------------------------------------------------------------------------------------------------------------------------------------------------------------------------------------------------------------------------------------------------------------------------------------------------|-----------------------------------------------------------------------------------------------------------------------------------------------------------------------------------------------------------------------------------------------------------------------------------------------------|-------------------------------------------------------------------------------------------------------------------------------------------------------------------------------------------------------------------------------------------------------------------------------------------------------------------------------------------------------------------------------------------------------------------------------------------------------------------------------------------------------------------------------------------------------------------------------------------------------------------------------------------------------------------------------------------------------------------------------------------------|---------------|-----|------------|-----------|
| IL-2 | NCT02203864 | Dose Escalation Study to Evaluate Safety and Tolerability of an Allogeneic Tumor Vaccine BIWB 2 in Patients With Advanced Malignant Melanoma                                                      | Completed | Melanoma                                                                                                                                                                                                                                                                                                                                                                                                                                                                          | Biological: BIWB2 component A Biological: BIWB2 component B                                                                                                                                                                                                                                         | Occurrence of dose limiting toxicity (DLT) Number of patients with adverse events Grading of local reactions on a 4-point-scale Number of patients with IL-2 transcripts in biopsies of injection sites Number of patients with delayed type hypersensitivity skin reaction Number of antigen-positive cells in biopsies from metastatic lesions Number of antigen-positive cells in the cellular infiltrate at the vaccination site Number of patients with a positive reaction to Multitest Merieux Change in T cell proliferation as ratio of post-vaccination to pre-vaccination Change in S-100 beta protein level in serum Number of patients with clinical response Change in interferon-gamma secretion as ratio of post-vaccination to | Phase 1       | 49  | Aug-98     | 31-Jul-14 |
| IL-2 | NCT00970996 | Cisplatin, Temozolomide, Abraxane, With Interleukin-2 and Interferon for Metastatic Melanoma                                                                                                      | Completed | Melanoma                                                                                                                                                                                                                                                                                                                                                                                                                                                                          | Drug: Temozolomide Drug: Abraxane Drug: Cisplatin Biological: Interleukin-2 Biological: Interferon alpha 2b                                                                                                                                                                                         | Response Rate                                                                                                                                                                                                                                                                                                                                                                                                                                                                                                                                                                                                                                                                                                                                   | Phase 1       | 10  | Sep-09     | 3-Jan-13  |
| IL-2 | NCT00001440 | Autologous T-Cell Transplantation and the Immunotherapy of Residual Disease in Breast Cancer: Pilot Study of Vaccine-Driven T-Cell Expansion in Patients Treated With Dose-Intensive Chemotherapy | Completed | Breast Neoplasm Neoplasm Metastasis                                                                                                                                                                                                                                                                                                                                                                                                                                               | Procedure: Autologous T cells Drug: Interleukin-2                                                                                                                                                                                                                                                   |                                                                                                                                                                                                                                                                                                                                                                                                                                                                                                                                                                                                                                                                                                                                                 | Phase 1       | 51  | Jul-95     | 4-Mar-08  |
| IL-2 | NCT00004881 | Vaccine Therapy in Treating Patients With Advanced Cancer                                                                                                                                         | Completed | Unspecified Adult Solid Tumor, Protocol Specific                                                                                                                                                                                                                                                                                                                                                                                                                                  | Biological: MVA-MUC1-IL2 vaccine                                                                                                                                                                                                                                                                    |                                                                                                                                                                                                                                                                                                                                                                                                                                                                                                                                                                                                                                                                                                                                                 | Phase 1       |     | April 2000 | 26-Jun-13 |
| IL-2 | NCT01266603 | High-Dose Interleukin-2 (HDIL-2), Combined With recMAGE-A3 + AS15 ASCI                                                                                                                            | Completed | Melanoma                                                                                                                                                                                                                                                                                                                                                                                                                                                                          | Drug: HDIL-2 Biological: recMAGE-A3 + AS15                                                                                                                                                                                                                                                          | Objective Response Rate                                                                                                                                                                                                                                                                                                                                                                                                                                                                                                                                                                                                                                                                                                                         | Phase 2       | 44  | 22-Feb-11  | 29-May-19 |
| IL-2 | NCT00211198 | Study of ONTAK® to Treat Cutaneous T-Cell Lymphoma (CTCL)                                                                                                                                         | Completed | Lymphoma, T-Cell, Cutaneous                                                                                                                                                                                                                                                                                                                                                                                                                                                       | Drug: ONTAK (denileukin difitox, DAB389IL-2)                                                                                                                                                                                                                                                        | To estimate response rates (CR + CCR + PR) according to CD25 status (CD25 positive and negative) after 4 cycles of ONTAK. Physician's Global Assessment (PGA) Time to Event Variables - Time to response, remission, treatment failure Response based on the CD25 status Response based on patient demographics: stage of disease, age, sex, performance status, total dose Number of cycles completed 6. Assess safety and                                                                                                                                                                                                                                                                                                                     | Phase 4       | 60  | May-01     | 5-Mar-08  |
| IL-2 | NCT00005949 | Vaccine Plus Interleukin-2 in Treating Patients With Advanced Melanoma                                                                                                                            | Completed | Recurrent Melanoma Stage IV Melanoma                                                                                                                                                                                                                                                                                                                                                                                                                                              | Biological: aldesleukin Biological: gp100:209-217(210M) peptide vaccine Other: laboratory biomarker                                                                                                                                                                                                 | Clinical response rate (CR or PR) Response duration Progression-free intervals Immunologic response rate using ELISPOT assay                                                                                                                                                                                                                                                                                                                                                                                                                                                                                                                                                                                                                    | Phase 2       | 50  | Mar-01     | 16-Jan-13 |
| IL-2 | NCT00001564 | A Pilot Study of Tumor-Specific Peptide Vaccination and IL-2 With or Without Autologous T Cell Transplantation in Recurrent                                                                       | Completed | Ewing's Sarcoma Rhabdomyosarcoma                                                                                                                                                                                                                                                                                                                                                                                                                                                  | Drug: EF-1 Peptide Drug: EF-2 Peptide Drug: PFK Peptide Drug: E7 Peptide Drug: IL-2 Drug: IL-4 Drug: GM-CSF Drug: CD40 Ligand                                                                                                                                                                       |                                                                                                                                                                                                                                                                                                                                                                                                                                                                                                                                                                                                                                                                                                                                                 | Phase 2       | 30  | 23-Dec-96  | 29-Nov-19 |
| IL-2 | NCT00720135 | Fusion Protein Cytokine Therapy After Rituximab in Treating Patients With B-Cell Non-Hodgkin Lymphoma                                                                                             | Completed | Anaplastic Large Cell Lymphoma Cutaneous B-cell Non-Hodgkin Lymphoma Extranodal Marginal Zone B-cell Lymphoma of Mucosa-associated Lymphoid Tissue Intraocular Lymphoma Nodal Marginal Zone B-cell Lymphoma Recurrent Adult Diffuse Small Cleaved Cell Lymphoma Recurrent Adult Grade III Lymphomatoid Granulomatosis Recurrent Grade 1 Follicular Lymphoma Recurrent Grade 2 Follicular Lymphoma Recurrent Marginal Zone Lymphoma Small Intestine Lymphoma Splenic Marginal Zone | Biological: DI-Leu16-IL2 immunocytokine Biological: rituximab Other: flow cytometry Other: immunohistochemistry staining method Other: pharmacological study Other: laboratory biomarker analysis Other: enzyme-linked immunosorbent assay Genetic: reverse transcriptase-polymerase chain reaction | Maximum tolerated dose of DI-Leu16-IL2 Optimal biologic dose of DI-Leu16-IL2 Toxicities associated with the DI-Leu16-IL2 regimen Immunogenicity as a result of DI-Leu16-IL2 administration Pharmacokinetics of DI-Leu16-IL2 administration Clinical responses and survival                                                                                                                                                                                                                                                                                                                                                                                                                                                                      | Phase 1       | 9   | Jan-08     | 8-Jun-15  |
| IL-2 | NCT00002882 | Interferon Alfa With or Without Combination Chemotherapy Plus Interleukin-2 in Treating Patients With Melanoma                                                                                    | Completed | Melanoma Skin Cancer                                                                                                                                                                                                                                                                                                                                                                                                                                                              | Biological: Aldesleukin (IL-2) Biological: Recombinant Interferon Alfa (IFN-A) Drug: Cisplatin Drug: Dacarbazine Drug: Vinblastine Procedure: Adjuvant Therapy                                                                                                                                      | Effectiveness of Interferon Alfa with/without Combination Chemotherapy + Interleukin-2 for Melanoma                                                                                                                                                                                                                                                                                                                                                                                                                                                                                                                                                                                                                                             | Phase 3       | 140 | Nov-95     | 13-Dec-11 |
| IL-2 | NCT00027807 | Biological Therapy in Treating Women With Stage IV Breast Cancer                                                                                                                                  | Completed | Breast Cancer                                                                                                                                                                                                                                                                                                                                                                                                                                                                     | Biological: Aldesleukin Biological: Sargramostim Biological: therapeutic autologous lymphocytes                                                                                                                                                                                                     | Maximum tolerated dose Toxicity profile Clinical responses Overall survival and progression-free survival Immune changes                                                                                                                                                                                                                                                                                                                                                                                                                                                                                                                                                                                                                        | Phase 1       | 6   | Oct-01     | 17-Feb-16 |
| IL-2 | NCT00040586 | Phase II Trial of Monoclonal Antibody (J591) in Combination With Low-Dose Subcutaneous Interleukin-2                                                                                              | Completed | Prostatic Neoplasms                                                                                                                                                                                                                                                                                                                                                                                                                                                               | Drug: Monoclonal Antibody J591 Drug: Recombinant Interleukin-2                                                                                                                                                                                                                                      |                                                                                                                                                                                                                                                                                                                                                                                                                                                                                                                                                                                                                                                                                                                                                 | Phase 2       |     |            | 22-Jan-07 |
| IL-2 | NCT00186862 | Gene Modified Allogeneic Neuroblastoma Cells For Treatment of Relapsed/Refractory                                                                                                                 | Completed | Neuroblastoma                                                                                                                                                                                                                                                                                                                                                                                                                                                                     | Drug: Interleukin-2                                                                                                                                                                                                                                                                                 | * To determine the safety of up to eight subcutaneous injections of allogeneic neuroblastoma cells that have been genetically modified by retroviral vectors to secrete lymphotactin and Interleukin-2                                                                                                                                                                                                                                                                                                                                                                                                                                                                                                                                          | Phase 1       | 24  | Aug-98     | 3-Jun-08  |
| IL-2 | NCT03027128 | QUILT-3.028: Study of haNK™ for Infusion in Subjects With Metastatic or Locally Advanced Solid Tumors                                                                                             | Completed | Solid Tumor                                                                                                                                                                                                                                                                                                                                                                                                                                                                       | Biological: haNK™ for Infusion                                                                                                                                                                                                                                                                      | Determination of maximum tolerated dose (MTD) or highest tested dose (HTD). Occurrence of dose-limiting toxicities (DLTs). Occurrence of treatment-emergent adverse event (AEs) and serious adverse events (SAEs). Objective response rate (ORR) according to the Response Evaluation Criteria in Solid Tumors (RECIST) Version 1.1 and immune-related response criteria (irRC). Progression free survival (PFS) by RECIST and                                                                                                                                                                                                                                                                                                                  | Phase 1       | 6   | 2-Aug-17   | 28-Aug-19 |
| IL-2 | NCT00937625 | T-cell Based Immunotherapy for of Melanoma                                                                                                                                                        | Completed | Melanoma                                                                                                                                                                                                                                                                                                                                                                                                                                                                          | Biological: cyclophosphamide, fludarabine, T-cells, Interleukin-2                                                                                                                                                                                                                                   | toxicity immune response tumor response                                                                                                                                                                                                                                                                                                                                                                                                                                                                                                                                                                                                                                                                                                         | Phase 1 Phase | 31  | Jun-09     | 18-Aug-15 |
| IL-2 | NCT00080353 | Vaccine Treatment in Combination With IL-2 and Treated Lymphocytes for Advanced Melanoma                                                                                                          | Completed | Melanoma                                                                                                                                                                                                                                                                                                                                                                                                                                                                          | Drug: IL-2 Drug: gp100:209-217 Drug: OKT3 Drug: rF-go 100P209 Drug: Montanide ISA 51                                                                                                                                                                                                                |                                                                                                                                                                                                                                                                                                                                                                                                                                                                                                                                                                                                                                                                                                                                                 | Phase 2       | 58  | Mar-04     | 14-Jun-12 |

|      |             |                                                                                                                                                           |           |                                                                                                                                                                                                                                                                                                                                                                                                                                                                                                                                                                                                                                                                                                                                                                                                                                                                                                                                                                                                                                                                                                                                                                                                                                                                                                                                                                                                                                                                                                                                                                                                                              |                                                                                                                 |                                                                                                                                                                                                                                                                                                                                                                                                                                                                                                                                                                                                                                                                                                                                                                                                                                                                                                                                                                                                                                                                                                                                                                                                                                                                                                                                                                                                                                                                                                                                                                                                                                                                                                                                                                                                                                                                                                  |         |    |            |           |
|------|-------------|-----------------------------------------------------------------------------------------------------------------------------------------------------------|-----------|------------------------------------------------------------------------------------------------------------------------------------------------------------------------------------------------------------------------------------------------------------------------------------------------------------------------------------------------------------------------------------------------------------------------------------------------------------------------------------------------------------------------------------------------------------------------------------------------------------------------------------------------------------------------------------------------------------------------------------------------------------------------------------------------------------------------------------------------------------------------------------------------------------------------------------------------------------------------------------------------------------------------------------------------------------------------------------------------------------------------------------------------------------------------------------------------------------------------------------------------------------------------------------------------------------------------------------------------------------------------------------------------------------------------------------------------------------------------------------------------------------------------------------------------------------------------------------------------------------------------------|-----------------------------------------------------------------------------------------------------------------|--------------------------------------------------------------------------------------------------------------------------------------------------------------------------------------------------------------------------------------------------------------------------------------------------------------------------------------------------------------------------------------------------------------------------------------------------------------------------------------------------------------------------------------------------------------------------------------------------------------------------------------------------------------------------------------------------------------------------------------------------------------------------------------------------------------------------------------------------------------------------------------------------------------------------------------------------------------------------------------------------------------------------------------------------------------------------------------------------------------------------------------------------------------------------------------------------------------------------------------------------------------------------------------------------------------------------------------------------------------------------------------------------------------------------------------------------------------------------------------------------------------------------------------------------------------------------------------------------------------------------------------------------------------------------------------------------------------------------------------------------------------------------------------------------------------------------------------------------------------------------------------------------|---------|----|------------|-----------|
| IL-2 | NCT01099631 | IL-2 Expressing, Attenuated Salmonella Typhimurium in Unresectable Hepatic Spread                                                                         | Completed | Cancer of the Liver Liver Cancer Hepatoma Liver Neoplasms Biliary Cancer                                                                                                                                                                                                                                                                                                                                                                                                                                                                                                                                                                                                                                                                                                                                                                                                                                                                                                                                                                                                                                                                                                                                                                                                                                                                                                                                                                                                                                                                                                                                                     | Biological: Salmonella typhimurium                                                                              | Maximum Tolerated Dose (MTD) of Salmonella typhimurium in Treating Unresectable Hepatic Metastases Efficacy of Salmonella typhimurium in Treating Unresectable Hepatic Metastases IL-2 Effect of Immune Function                                                                                                                                                                                                                                                                                                                                                                                                                                                                                                                                                                                                                                                                                                                                                                                                                                                                                                                                                                                                                                                                                                                                                                                                                                                                                                                                                                                                                                                                                                                                                                                                                                                                                 | Phase 1 | 22 | April 2010 | 2-Dec-17  |
| IL-2 | NCT00005576 | Monoclonal Antibody Therapy With Sargramostim and Interleukin-2 in Treating Children With                                                                 | Completed | Disseminated Neuroblastoma Recurrent Neuroblastoma Regional Neuroblastoma                                                                                                                                                                                                                                                                                                                                                                                                                                                                                                                                                                                                                                                                                                                                                                                                                                                                                                                                                                                                                                                                                                                                                                                                                                                                                                                                                                                                                                                                                                                                                    | Biological: monoclonal antibody Ch14.18 Drug: isotretinoin Biological: aldesleukin Biological: sargramostim     | Maximum tolerated dose of monoclonal antibody (MOAB) ch14.18 when combined with sargramostim and IL-2 after autologous bone marrow or peripheral blood stem cell rescue in children with neuroblastoma                                                                                                                                                                                                                                                                                                                                                                                                                                                                                                                                                                                                                                                                                                                                                                                                                                                                                                                                                                                                                                                                                                                                                                                                                                                                                                                                                                                                                                                                                                                                                                                                                                                                                           | Phase 1 | 6  | Jan-01     | 16-Jan-13 |
| IL-2 | NCT00616564 | Phase II Trial of (IL-2) With Priming and (GM-CSF) in Patients With Advanced Melanoma                                                                     | Completed | Malignant Melanoma                                                                                                                                                                                                                                                                                                                                                                                                                                                                                                                                                                                                                                                                                                                                                                                                                                                                                                                                                                                                                                                                                                                                                                                                                                                                                                                                                                                                                                                                                                                                                                                                           | Drug: GM-CSF                                                                                                    | Primary Objective                                                                                                                                                                                                                                                                                                                                                                                                                                                                                                                                                                                                                                                                                                                                                                                                                                                                                                                                                                                                                                                                                                                                                                                                                                                                                                                                                                                                                                                                                                                                                                                                                                                                                                                                                                                                                                                                                | Phase 2 | 36 | Feb-06     | 3-May-12  |
| IL-2 | NCT02350673 | A Study of Intravenous (IV) Cergutuzumab Amunaleukin and Atezolizumab in Combination in Participants With Locally Advanced and/or Metastatic Solid Tumors | Completed | Solid Tumors                                                                                                                                                                                                                                                                                                                                                                                                                                                                                                                                                                                                                                                                                                                                                                                                                                                                                                                                                                                                                                                                                                                                                                                                                                                                                                                                                                                                                                                                                                                                                                                                                 | Drug: Atezolizumab Drug: Cergutuzumab Amunaleukin                                                               | Number of Participants with Dose-Limiting Toxicities MTD of Cergutuzumab Amunaleukin Recommended Phase II Dose of Cergutuzumab Amunaleukin Percentage of Participants with Adverse Events Percentage of Participants with Infusion-Related Reactions Percentage of Participants with Seroconversion of Autoantibodies Forced Expiratory Volume Forced Vital Capacity Percentage of Participants with Anti-Atezolizumab Antibodies Percentage of Participants with Anti-Cergutuzumab Amunaleukin Antibodies Percentage of Participants with Objective Response of Complete Response (CR) or Partial Response (PR) Based on Response Evaluation Criteria in Solid Tumors (RECIST) Version (v) 1.1 as Determined by the Investigator Percentage of Participants with Disease Control (Tumor Response of CR or PR or Stable Disease [SD]) Based on RECIST v1.1 as Determined by the Investigator Percentage of Participants with SD, Based on RECIST v1.1 as Determined by the Investigator Progression-Free Survival Based on RECIST v1.1 as Determined by the Investigator Overall Survival Area Under the Concentration Time Curve (AUC) of Cergutuzumab Amunaleukin in "Atezolizumab q2w and Cergutuzumab Amunaleukin q2w" AUC of Cergutuzumab Amunaleukin in "Atezolizumab q3w and Cergutuzumab Amunaleukin qw" Minimum Drug Concentration (Cmin) of Cergutuzumab Amunaleukin in "Atezolizumab q2w and Cergutuzumab Amunaleukin q2w" Cmin of Cergutuzumab Amunaleukin in "Atezolizumab q3w and Cergutuzumab Amunaleukin qw" Maximum Drug Concentration (Cmax) of Cergutuzumab Amunaleukin in "Atezolizumab q2w and Cergutuzumab Amunaleukin q2w" Cmax of Cergutuzumab Amunaleukin in "Atezolizumab q3w and Cergutuzumab Amunaleukin qw" Cmin of Atezolizumab in "Atezolizumab q3w and Cergutuzumab Amunaleukin q2w" Cmax of Atezolizumab in "Atezolizumab q3w and Cergutuzumab Amunaleukin q2w" | Phase 1 | 70 | 29-Jun-15  | 18-Jan-20 |
| IL-2 | NCT00032188 | Interleukin-2 and Bryostatins 1 in Treating Patients With Advanced                                                                                        | Completed | Recurrent Renal Cell Cancer Stage III Renal Cell Cancer Stage IV Renal Cell Cancer                                                                                                                                                                                                                                                                                                                                                                                                                                                                                                                                                                                                                                                                                                                                                                                                                                                                                                                                                                                                                                                                                                                                                                                                                                                                                                                                                                                                                                                                                                                                           | Biological: aldesleukin Drug: bryostatin 1 Other: laboratory biomarker analysis                                 | Overall response (CR and PR) Time to disease progression Overall survival Disease-free survival All observed toxicities assessed using CTC version 2.0                                                                                                                                                                                                                                                                                                                                                                                                                                                                                                                                                                                                                                                                                                                                                                                                                                                                                                                                                                                                                                                                                                                                                                                                                                                                                                                                                                                                                                                                                                                                                                                                                                                                                                                                           | Phase 2 | 65 | Jan-02     | 24-Jan-13 |
| IL-2 | NCT00010192 | Rituximab Plus Interleukin-2 in Treating Patients With Hematologic Cancer                                                                                 | Completed | B-cell Adult Acute Lymphoblastic Leukemia Extranodal Marginal Zone B-cell Lymphoma of Mucosa-associated Lymphoid Tissue Nodal Marginal Zone B-cell Lymphoma Noncontiguous Stage II Adult Burkitt Lymphoma Noncontiguous Stage II Adult Diffuse Large Cell Lymphoma Noncontiguous Stage II Adult Diffuse Mixed Cell Lymphoma Noncontiguous Stage II Adult Diffuse Small Cleaved Cell Lymphoma Noncontiguous Stage II Adult Immunoblastic Large Cell Lymphoma Noncontiguous Stage II Adult Lymphoblastic Lymphoma Noncontiguous Stage II Grade 1 Follicular Lymphoma Noncontiguous Stage II Grade 2 Follicular Lymphoma Noncontiguous Stage II Grade 3 Follicular Lymphoma Noncontiguous Stage II Mantle Cell Lymphoma Noncontiguous Stage II Marginal Zone Lymphoma Noncontiguous Stage II Small Lymphocytic Lymphoma Recurrent Adult Acute Lymphoblastic Leukemia Recurrent Adult Burkitt Lymphoma Recurrent Adult Diffuse Large Cell Lymphoma Recurrent Adult Diffuse Mixed Cell Lymphoma Recurrent Adult Diffuse Small Cleaved Cell Lymphoma Recurrent Adult Immunoblastic Large Cell Lymphoma Recurrent Adult Lymphoblastic Lymphoma Recurrent Grade 1 Follicular Lymphoma Recurrent Grade 2 Follicular Lymphoma Recurrent Grade 3 Follicular Lymphoma Recurrent Mantle Cell Lymphoma Recurrent Marginal Zone Lymphoma Recurrent Small Lymphocytic Lymphoma Splenic Marginal Zone Lymphoma Stage III Adult Burkitt Lymphoma Stage III Adult Diffuse Large Cell Lymphoma Stage III Adult Diffuse Mixed Cell Lymphoma Stage III Adult Diffuse Small Cleaved Cell Lymphoma Stage III Adult Immunoblastic Large Cell Lymphoma | Biological: rituximab Biological: aldesleukin Other: laboratory biomarker analysis Other: pharmacological study | MTD defined as the dose preceding that at which at least 2 of 6 patients experience DLT using NCI CTC version 2.0                                                                                                                                                                                                                                                                                                                                                                                                                                                                                                                                                                                                                                                                                                                                                                                                                                                                                                                                                                                                                                                                                                                                                                                                                                                                                                                                                                                                                                                                                                                                                                                                                                                                                                                                                                                | Phase 1 | 30 | Dec-00     | 6-Jun-13  |

|      |             |                                                                                                                                                                                                                                              |           |                                                                                                                                                                                                                                                                                                                                                  |                                                                                                                                                                                                                                 |                                                                                                                                                                                                                                                                                                                                                                                                                                                                                                                                                                                                                                                                                  |                 |     |            |                |
|------|-------------|----------------------------------------------------------------------------------------------------------------------------------------------------------------------------------------------------------------------------------------------|-----------|--------------------------------------------------------------------------------------------------------------------------------------------------------------------------------------------------------------------------------------------------------------------------------------------------------------------------------------------------|---------------------------------------------------------------------------------------------------------------------------------------------------------------------------------------------------------------------------------|----------------------------------------------------------------------------------------------------------------------------------------------------------------------------------------------------------------------------------------------------------------------------------------------------------------------------------------------------------------------------------------------------------------------------------------------------------------------------------------------------------------------------------------------------------------------------------------------------------------------------------------------------------------------------------|-----------------|-----|------------|----------------|
| IL-2 | NCT00470015 | Vaccine Therapy and GM-CSF With or Without Low-Dose Aldesleukin in Treating Patients With Stage II, Stage III, or Stage IV Melanoma                                                                                                          | Completed | Melanoma (Skin)                                                                                                                                                                                                                                                                                                                                  | Biological: MART-1 antigen Biological: IL-2 Biological: gp100 antigen Biological: GM-CSF Biological: MART-1a peptide                                                                                                            | Percent changes in peptide vaccine-specific immune responses (tetramer frequencies) from pretreatment levels Number and severity of hematologic and nonhematologic toxicities observed at each dose level Delayed-type hypersensitivity positivity Maximum percent change in CD4, CD8, CD14, CD19, and CD20 levels from preimmunization                                                                                                                                                                                                                                                                                                                                          | Phase 1         | 20  | Mar-07     | 19-Feb-19      |
| IL-2 | NCT00058045 | Interleukin-2 and Stem Cell Factor in Treating Patients With AIDS or AIDS-Related Cancer                                                                                                                                                     | Completed | Lymphoma                                                                                                                                                                                                                                                                                                                                         | Biological: aldesleukin Biological: recombinant human stem cell factor                                                                                                                                                          |                                                                                                                                                                                                                                                                                                                                                                                                                                                                                                                                                                                                                                                                                  | Phase 1         | 1   | Aug-02     | 31-Jan-13      |
| IL-2 | NCT01256801 | Gene Expression Profiling of Breast Cancer Cells Predict the Response of Malignant Pleural Effusion                                                                                                                                          | Completed | Breast Neoplasms Neoplasm Metastasis Gene Expression Profiling Immunotherapy                                                                                                                                                                                                                                                                     | Biological: cytokine                                                                                                                                                                                                            | immunotherapy response immunological status                                                                                                                                                                                                                                                                                                                                                                                                                                                                                                                                                                                                                                      |                 | 36  | Nov-10     | 29-Jul-15      |
| IL-2 | NCT00279058 | The Role of Peptide-loaded Dendritic Cells to Augment the Therapeutic Effect of Interleukin-2                                                                                                                                                | Completed | Metastatic Melanoma                                                                                                                                                                                                                                                                                                                              | Procedure: Immunotherapy treatment for melanoma                                                                                                                                                                                 | Complete evaluation of untreated lesions with physical examination and appropriate X-rays and/or scans will be performed four to six weeks after the last DC injection. Immunological evaluation will be performed two weeks after the last DC injection                                                                                                                                                                                                                                                                                                                                                                                                                         | Phase 1 Phase 2 | 24  | Dec-05     | April 21, 2015 |
| IL-2 | NCT00896701 | Relationship Between Natural Killer Cells' Ability to Kill Leukemia Cells and the Outcome of Patients With Acute Myeloid Leukemia Previously Treated With Interleukin-2                                                                      | Completed | Leukemia                                                                                                                                                                                                                                                                                                                                         | Other: flow cytometry Other: immunologic technique Other: laboratory biomarker analysis                                                                                                                                         | Correlation of in vitro lysis of autologous pre-treatment acute myeloid leukemia (AML) blasts with relapse-free survival Correlation of expression of inhibitory and activating ligands on AML blast cells with relapse-free survival Correlation of expression of activating and inhibitory natural killer (NK) receptors on interleukin-2-expanded cells with relapse-free survival Comparison of the susceptibility to autologous NK cell lysis of leukemic blasts obtained at diagnosis with those blasts obtained at relapse                                                                                                                                                |                 | 451 | Jan-04     | 13-Jul-16      |
| IL-2 | NCT00006022 | Interleukin-2 Plus Bryostatin 1 in Treating Patients With Melanoma or Kidney Cancer                                                                                                                                                          | Completed | Kidney Cancer Melanoma (Skin)                                                                                                                                                                                                                                                                                                                    | Biological: aldesleukin Drug: bryostatin 1                                                                                                                                                                                      |                                                                                                                                                                                                                                                                                                                                                                                                                                                                                                                                                                                                                                                                                  | Phase 1         | 17  | Sep-00     | 14-Dec-15      |
| IL-2 | NCT00006033 | Interleukin-2 Gene or Methotrexate in Treating Patients With Recurrent or Refractory Stage III or Stage IV Head and Neck Cancer                                                                                                              | Completed | Head and Neck Cancer                                                                                                                                                                                                                                                                                                                             | Biological: gene therapy Biological: interleukin-2 gene Drug: methotrexate                                                                                                                                                      |                                                                                                                                                                                                                                                                                                                                                                                                                                                                                                                                                                                                                                                                                  | Phase 2         |     | Jun-00     | 30-May-13      |
| IL-2 | NCT00003568 | Vaccine Therapy With High-Dose Interleukin-2 in Treating Patients With Metastatic Melanoma                                                                                                                                                   | Completed | Melanoma (Skin)                                                                                                                                                                                                                                                                                                                                  | Biological: aldesleukin Biological: gp100 antigen Biological: incomplete Freund's adjuvant                                                                                                                                      |                                                                                                                                                                                                                                                                                                                                                                                                                                                                                                                                                                                                                                                                                  | Phase 2         |     | Nov-98     | 26-Jun-13      |
| IL-2 | NCT00002649 | Interleukin-2 or Observation Following Radiation Therapy, Combination Chemotherapy, and Peripheral Stem Cell Transplantation in Treating Patients With Recurrent Non-Hodgkin's Lymphoma                                                      | Completed | Recurrent Adult Burkitt Lymphoma Recurrent Adult Diffuse Large Cell Lymphoma Recurrent Adult Diffuse Mixed Cell Lymphoma Recurrent Adult Diffuse Small Cleaved Cell Lymphoma Recurrent Adult Immunoblastic Large Cell Lymphoma Recurrent Grade 1 Follicular Lymphoma Recurrent Grade 2 Follicular Lymphoma Recurrent Grade 3 Follicular Lymphoma | Biological: aldesleukin Biological: filgrastim Drug: cyclophosphamide Drug: etoposide Radiation: radiation therapy Procedure: peripheral blood stem cell transplantation Procedure: bone marrow ablation with stem cell support | Overall survival Disease-free survival Frequency and severity of toxicity associated with post-transplant aldesleukin therapy                                                                                                                                                                                                                                                                                                                                                                                                                                                                                                                                                    | Phase 3         | 206 | May-95     | 28-Feb-13      |
| IL-2 | NCT02482090 | TIL Therapy for Metastatic Ovarian Cancer                                                                                                                                                                                                    | Completed | Metastatic Ovarian Cancer                                                                                                                                                                                                                                                                                                                        | Drug: Cyclophosphamide Drug: Fludarabine Biological: TIL infusion Drug: Interleukin-2                                                                                                                                           | Number and type of reported adverse events Treatment related immune responses Objective response rate Overall Survival Progression free survival                                                                                                                                                                                                                                                                                                                                                                                                                                                                                                                                 | Phase 1         | 6   | Jul-15     | 16-Aug-17      |
| IL-2 | NCT01082926 | Phase I Study of Cellular Immunotherapy for Recurrent/Refractory Malignant Glioma Using Intratumoral Infusions of GRm13Z40-2, An Allogeneic CD8+ Cytolytic T-Cell Line Genetically Modified to Express the IL 13-Zetakine and HvTK and to be | Completed | Anaplastic Astrocytoma Anaplastic Ependymoma Anaplastic Meningioma Anaplastic Oligodendroglioma Brain Glioma Ependymoblastoma Giant Cell Glioblastoma Glioblastoma Gliosarcoma Grade III Meningioma Meningeal Hemangiopericytoma Mixed Glioma Pineal Gland Astrocytoma Brain Tumor                                                               | Biological: therapeutic allogeneic lymphocytes Biological: aldesleukin Other: laboratory biomarker analysis Procedure: positron emission tomography                                                                             | Safety of GRm13Z40-2 CTL CNS loco-regional cellular immunotherapy Safety of convection enhanced delivery (CED) of recombinant human Interleukin-2 (rhIL-2) used in conjunction with GRm13Z40-2 CTL adoptive transfer Toxicity as assessed by NCI CTCAE version 4.0 Ability of 9-(4-fluoro-3-hydroxy-methyl-butyl) guanine (18FHBG) positron emission tomography PET to image GRm13Z40-2 CTLs Impact of concurrent dexamethasone on the tempo and magnitude of T cell allograft rejection responses by tracking the frequency of anti-GRm13Z40-2 immune responses in serially acquired peripheral blood samples Evaluation of ganciclovir administration for ablating transferred | Phase 1         | 6   | May-10     | 8-Jun-15       |
| IL-2 | NCT00304460 | Mechanism of Action of High-Dose IL-2 (Aldesleukin) in Metastatic Melanoma and Kidney Cancer                                                                                                                                                 | Completed | Metastatic Melanoma Renal Cell Cancer                                                                                                                                                                                                                                                                                                            | Biological: aldesleukin                                                                                                                                                                                                         | Clinical outcome as measured by RECIST                                                                                                                                                                                                                                                                                                                                                                                                                                                                                                                                                                                                                                           | Phase 1         | 138 | 13-Mar-06  | 12-Dec-19      |
| IL-2 | NCT00006864 | Interleukin-2 in Treating Patients With Metastatic Kidney Cancer                                                                                                                                                                             | Completed | Kidney Cancer                                                                                                                                                                                                                                                                                                                                    | Biological: aldesleukin                                                                                                                                                                                                         |                                                                                                                                                                                                                                                                                                                                                                                                                                                                                                                                                                                                                                                                                  | Phase 4         |     | Jul-00     | 9-Jan-14       |
| IL-2 | NCT02354690 | Vemurafenib and TIL Therapy for Metastatic Melanoma                                                                                                                                                                                          | Completed | Metastatic Melanoma                                                                                                                                                                                                                                                                                                                              | Drug: Vemurafenib Drug: Lymphodepleting chemotherapy Drug: TIL infusion Drug: Interleukin-2                                                                                                                                     | Number of reported adverse events Treatment related immune responses Objective response rate Overall survival Progression free survival                                                                                                                                                                                                                                                                                                                                                                                                                                                                                                                                          | Phase 1 Phase 2 | 12  | Nov-14     | 7-Mar-19       |
| IL-2 | NCT00018941 | Interleukin-2 in Treating Patients With Metastatic Kidney Cancer                                                                                                                                                                             | Completed | Kidney Cancer                                                                                                                                                                                                                                                                                                                                    | Biological: aldesleukin                                                                                                                                                                                                         |                                                                                                                                                                                                                                                                                                                                                                                                                                                                                                                                                                                                                                                                                  | Phase 3         |     | April 1991 | 17-Jun-13      |
| IL-2 | NCT00003962 | Interleukin-2 Following Bone Marrow Transplantation in Treating Patients With Hematologic Cancer                                                                                                                                             | Completed | Leukemia Lymphoma Multiple Myeloma and Plasma Cell Neoplasm                                                                                                                                                                                                                                                                                      | Biological: aldesleukin                                                                                                                                                                                                         |                                                                                                                                                                                                                                                                                                                                                                                                                                                                                                                                                                                                                                                                                  | Phase 1         |     | April 1998 | 2-May-14       |
| IL-2 | NCT00004890 | Biomed 101 and Interleukin-2 in Treating Patients With Kidney                                                                                                                                                                                | Completed | Drug Extravasation Kidney Cancer                                                                                                                                                                                                                                                                                                                 | Biological: aldesleukin Drug: Biomed 101                                                                                                                                                                                        |                                                                                                                                                                                                                                                                                                                                                                                                                                                                                                                                                                                                                                                                                  | Phase 1         |     | Dec-00     | 26-Mar-13      |
| IL-2 | NCT00003148 | Interleukin-2 in Treating Patients With Relapsed or Refractory Acute Myelogenous Leukemia                                                                                                                                                    | Completed | Leukemia                                                                                                                                                                                                                                                                                                                                         | Biological: aldesleukin                                                                                                                                                                                                         |                                                                                                                                                                                                                                                                                                                                                                                                                                                                                                                                                                                                                                                                                  | Phase 2         | 86  | Oct-97     | 2-Jul-12       |

|      |             |                                                                                                                                                       |           |                                                                                                                                                                                                        |                                                                                                                                                                                                                                                            |                                                                                                                                                                                                                                                                                                                                                                                                                                                                                                                                                                                                                                                                                                             |                 |     |           |                |
|------|-------------|-------------------------------------------------------------------------------------------------------------------------------------------------------|-----------|--------------------------------------------------------------------------------------------------------------------------------------------------------------------------------------------------------|------------------------------------------------------------------------------------------------------------------------------------------------------------------------------------------------------------------------------------------------------------|-------------------------------------------------------------------------------------------------------------------------------------------------------------------------------------------------------------------------------------------------------------------------------------------------------------------------------------------------------------------------------------------------------------------------------------------------------------------------------------------------------------------------------------------------------------------------------------------------------------------------------------------------------------------------------------------------------------|-----------------|-----|-----------|----------------|
| IL-2 | NCT00329368 | Safety and Tolerability Study of Folate-Immune in Combination With Cytokines in Patients With Refractory or Metastatic Cancer                         | Completed | Cancer                                                                                                                                                                                                 | Biological: EC90 (KLH-FITC) Biological: GPI-0100 Drug: EC17 (Folate-FITC) Drug: Interleukin-2 Drug: Interferon-alpha                                                                                                                                       | Safety Tolerability Anti-tumor Activity                                                                                                                                                                                                                                                                                                                                                                                                                                                                                                                                                                                                                                                                     | Phase 1         | 13  | Sep-05    | 9-Mar-12       |
| IL-2 | NCT00020254 | Vaccine Therapy Plus Sargramostim and Interleukin-2 Compared With Nilutamide Alone in Treating Patients With Prostate Cancer                          | Completed | Prostate Cancer                                                                                                                                                                                        | Biological: aldesleukin Biological: recombinant fowlpox-prostate specific antigen vaccine Biological: recombinant vaccinia prostate-specific antigen vaccine Biological: recombinant vaccinia-B7.1 vaccine Biological:                                     |                                                                                                                                                                                                                                                                                                                                                                                                                                                                                                                                                                                                                                                                                                             | Phase 2         |     | Jun-00    | April 29, 2015 |
| IL-2 | NCT00291369 | Cytokines in Patients With Metastatic Renal Cell Carcinoma of Intermediate Prognosis                                                                  | Completed | Metastatic Renal Cell Carcinoma                                                                                                                                                                        | Drug: Interleukin-2 Drug: Interferon alfa Drug: medroxyprogesterone acetate                                                                                                                                                                                | Overall survival Progression-free survival Objective response rate Toxicity Quality of life                                                                                                                                                                                                                                                                                                                                                                                                                                                                                                                                                                                                                 | Phase 3         | 456 | Dec-99    | 16-Feb-06      |
| IL-2 | NCT00414765 | Aldesleukin in Patients With Metastatic Renal Cell Carcinoma and Metastatic Melanoma                                                                  | Completed | Metastatic Renal Cell Carcinoma Metastatic Melanoma                                                                                                                                                    | Drug: Aldesleukin                                                                                                                                                                                                                                          | Pharmacokinetics of Aldesleukin                                                                                                                                                                                                                                                                                                                                                                                                                                                                                                                                                                                                                                                                             | Phase 1 Phase 2 | 26  | Jan-06    | 12-Feb-13      |
| IL-2 | NCT01713439 | Allogeneic Neuroblastoma Cells for Relapsed/Refractory Neuroblastoma, CYCHEALL                                                                        | Completed | Neuroblastoma                                                                                                                                                                                          | Biological: Injection of allogeneic neuroblastoma cells                                                                                                                                                                                                    | To assess the safety of up to four subcutaneous (SC) injections of allogeneic neuroblastoma cells which have been genetically modified by measuring adverse events. To assess the safety of up to eight (total) injections in patients who have received the first four injections without unacceptable toxicity and have evidence of stable disease or better after receiving these injections by measuring adverse events. To determine whether MHC restricted or unrestricted antitumor immune responses are induced by SC injection of modified allogeneic neuroblasts and the cell doses required to produce these effects measured by punch biopsies. Assess the antitumor effect by routine clinical | Phase 1         | 32  | Dec-97    | 9-Jun-16       |
| IL-2 | NCT00418496 | Interleukin-2 With Sorafenib (BAY 43-9006) for Unresectable or Metastatic Clear Cell Renal Carcinoma (RCC) and Metastatic                             | Completed | Renal Cancer Melanoma                                                                                                                                                                                  | Drug: Aldesleukin Drug: Sorafenib                                                                                                                                                                                                                          | Maximum Tolerated Dose (MTD) Determine the progression free survival. Evaluate in a preliminary manner the response rate.                                                                                                                                                                                                                                                                                                                                                                                                                                                                                                                                                                                   | Phase 1         | 17  | 8-Nov-06  | 20-Feb-17      |
| IL-2 | NCT00002572 | Cytotoxic T Cells and Interleukin-2 in Treating Adult Patients With Recurrent Brain Tumors                                                            | Completed | Brain and Central Nervous System Tumors                                                                                                                                                                | Biological: aldesleukin Biological: muronab-CD3 Biological: therapeutic tumor infiltrating lymphocytes Procedure:                                                                                                                                          |                                                                                                                                                                                                                                                                                                                                                                                                                                                                                                                                                                                                                                                                                                             | Phase 1         | 10  | Nov-94    | 30-May-13      |
| IL-2 | NCT00054535 | Vaccine Therapy and Interleukin-2 in Treating Patients With Metastatic Melanoma                                                                       | Completed | Melanoma (Skin)                                                                                                                                                                                        | Biological: aldesleukin Biological: recombinant fowlpox-tyrosinase vaccine Biological: vaccinia-tyrosinase                                                                                                                                                 |                                                                                                                                                                                                                                                                                                                                                                                                                                                                                                                                                                                                                                                                                                             | Phase 2         |     | Jan-03    | 19-Jun-13      |
| IL-2 | NCT00006228 | Trastuzumab and Interleukin-2 in Treating Patients With Metastatic Breast Cancer                                                                      | Completed | HER2-positive Breast Cancer Male Breast Cancer Recurrent Breast Cancer Stage IV Breast Cancer                                                                                                          | Biological: trastuzumab Biological: aldesleukin Other: laboratory biomarker analysis Other: pharmacological study                                                                                                                                          | Response rate using Response Evaluation Criteria in Solid Tumors (RECIST) Toxicity assessed using Common Toxicity Criteria (CTC) version 2.0 Degree of NK cell expansion Effectiveness of patients' PBMCs in a standard ADCC assay directed against                                                                                                                                                                                                                                                                                                                                                                                                                                                         | Phase 2         | 37  | Jul-00    | 8-Oct-13       |
| IL-2 | NCT00003993 | Bryostatins 1 and Interleukin-2 in Treating Patients With Refractory Solid Tumors or Lymphoma                                                         | Completed | Lymphoma Small Intestine Cancer Unspecified Adult Solid Tumor, Protocol Specific                                                                                                                       | Biological: aldesleukin Drug: bryostatins 1                                                                                                                                                                                                                |                                                                                                                                                                                                                                                                                                                                                                                                                                                                                                                                                                                                                                                                                                             | Phase 1         | 24  | Sep-99    | April 29, 2015 |
| IL-2 | NCT00002504 | Interleukin-2 Plus Interferon Alfa in Treating Adults With Metastatic Cancer                                                                          | Completed | Chronic Myeloproliferative Disorders Leukemia Lymphoma Multiple Myeloma and Plasma Cell Neoplasm Myelodysplastic Syndromes Precancerous/Nonmalignant Condition Unspecified Adult Solid Tumor, Protocol | Biological: aldesleukin Biological: recombinant interferon alfa                                                                                                                                                                                            |                                                                                                                                                                                                                                                                                                                                                                                                                                                                                                                                                                                                                                                                                                             | Phase 2         |     | Aug-92    | 12-May-11      |
| IL-2 | NCT00005802 | Chemotherapy Followed by Donor White Blood Cells Plus Interleukin-2 in Treating Patients With Acute Myeloid or Lymphocytic Leukemia                   | Completed | Leukemia                                                                                                                                                                                               | Biological: aldesleukin Biological: filgrastim Biological: therapeutic allogeneic lymphocytes Drug: cytarabine Drug: etoposide Drug: fludarabine phosphate Drug: methotrexate Drug: mitoxantrone hydrochloride Drug: therapeutic hydrocortisone Radiation: |                                                                                                                                                                                                                                                                                                                                                                                                                                                                                                                                                                                                                                                                                                             | Phase 1 Phase 2 |     | Jun-99    | April 2, 2010  |
| IL-2 | NCT00062036 | Cyclophosphamide and Fludarabine Followed By Interleukin-2 Gene-Modified Tumor Infiltrating Lymphocytes in Treating Patients With Metastatic Melanoma | Completed | Melanoma (Skin)                                                                                                                                                                                        | Biological: aldesleukin Biological: filgrastim Biological: incomplete Freund's adjuvant Biological: interleukin-2 gene Biological: therapeutic tumor infiltrating lymphocytes Drug:                                                                        | Survival Clinical tumor regression Toxicity profile                                                                                                                                                                                                                                                                                                                                                                                                                                                                                                                                                                                                                                                         | Phase 1 Phase 2 | 33  | Jun-03    | 2-Jul-17       |
| IL-2 | NCT02118285 | Intraperitoneal Natural Killer Cells and INCB024360 for Recurrent Ovarian, Fallopian Tube, and Primary Peritoneal Cancer                              | Completed | Ovarian Cancer Fallopian Tube Carcinoma Primary Peritoneal Carcinoma                                                                                                                                   | Drug: Fludarabine Drug: Cyclophosphamide Biological: NK cells Biological: IL-2 Drug: INCB024360                                                                                                                                                            | Maximum tolerated dose of INCB024360 Initial tumor response Duration of tumor response Progression-free survival Overall survival                                                                                                                                                                                                                                                                                                                                                                                                                                                                                                                                                                           | Phase 1         | 2   | 28-Jul-14 | 5-Dec-17       |
| IL-2 | NCT00003356 | Rituximab Plus Interleukin-2 in Treating Patients With Lymphoma                                                                                       | Completed | Lymphoma                                                                                                                                                                                               | Biological: aldesleukin Biological: rituximab                                                                                                                                                                                                              |                                                                                                                                                                                                                                                                                                                                                                                                                                                                                                                                                                                                                                                                                                             | Phase 1 Phase 2 | 58  | Nov-97    | 16-Oct-13      |
| IL-2 | NCT00004104 | Vaccine Therapy Plus Interleukin-2 With or Without Interferon Alfa-2b in Treating Patients With Stage III                                             | Completed | Melanoma (Skin)                                                                                                                                                                                        | Biological: liposomal interleukin-2 Biological: polyvalent melanoma vaccine Biological: recombinant interferon                                                                                                                                             |                                                                                                                                                                                                                                                                                                                                                                                                                                                                                                                                                                                                                                                                                                             | Phase 2         |     | Jun-98    | 31-Mar-16      |



|      |             |                                                                                                                                                                     |           |                                                                                                                               |                                                                                                                                                                                                     |                                                                                                                                                                                                                                                                                                                                                                          |                 |     |        |                |
|------|-------------|---------------------------------------------------------------------------------------------------------------------------------------------------------------------|-----------|-------------------------------------------------------------------------------------------------------------------------------|-----------------------------------------------------------------------------------------------------------------------------------------------------------------------------------------------------|--------------------------------------------------------------------------------------------------------------------------------------------------------------------------------------------------------------------------------------------------------------------------------------------------------------------------------------------------------------------------|-----------------|-----|--------|----------------|
| IL-2 | NCT00001705 | Immunization of Patients With Metastatic Melanoma Using the GP100 Peptide Preceded by an Endoplasmic Reticulum Insertion                                            | Completed | Melanoma Neoplasm Metastasis                                                                                                  | Drug: GP100 peptide Drug: IL-2                                                                                                                                                                      |                                                                                                                                                                                                                                                                                                                                                                          | Phase 2         | 141 | Jul-98 | 4-Mar-08       |
| IL-2 | NCT00058279 | Monoclonal Antibody Therapy and Interleukin-2 in Treating Patients With Metastatic Melanoma                                                                         | Completed | Intraocular Melanoma Melanoma (Skin)                                                                                          | Biological: aldesleukin Biological: ipilimumab                                                                                                                                                      |                                                                                                                                                                                                                                                                                                                                                                          | Phase 1 Phase 2 |     | Feb-03 | 20-Jun-13      |
| IL-2 | NCT00003991 | Interleukin-2 Plus Histamine Dihydrochloride in Treating Patients With Acute Myeloid Leukemia                                                                       | Completed | Leukemia                                                                                                                      | Biological: aldesleukin Drug: histamine dihydrochloride                                                                                                                                             |                                                                                                                                                                                                                                                                                                                                                                          | Phase 3         | 360 | Jul-98 | 6-Nov-13       |
| IL-2 | NCT00039000 | Study of Heat Shock Protein-Peptide Complex (HSPPC-96) Versus IL-2/DTIC for Stage IV Melanoma                                                                       | Completed | Malignant Melanoma                                                                                                            | Drug: HSPPC-96 or Oncophage                                                                                                                                                                         |                                                                                                                                                                                                                                                                                                                                                                          | Phase 3         | 350 | Mar-02 | 7-Sep-12       |
| IL-2 | NCT00591188 | Capecitabine and Interferon-Alpha in Metastatic Renal Cell Carcinoma Patients With Failure on Interleukin-2 Based Regimens                                          | Completed | Carcinoma, Renal Cell                                                                                                         | Drug: capecitabine, interferon-alpha                                                                                                                                                                | Evaluate progression-free survival with capecitabine and interferon treatment in metastatic renal cell carcinoma (MRCC) patients (pts) with IL-2 failure in first-line Evaluate the safety and tolerability of the capecitabine and interferon combination Evaluate response rate and overall survival with the capecitabine and interferon combination in MRCC pts with | Phase 2         | 49  | Dec-06 | 1-May-09       |
| IL-2 | NCT00004248 | Doxorubicin and Interleukin-2 in Treating Patients With Liver Cancer That Cannot Be Removed by                                                                      | Completed | Liver Cancer                                                                                                                  | Biological: aldesleukin Drug: doxorubicin hydrochloride                                                                                                                                             |                                                                                                                                                                                                                                                                                                                                                                          | Phase 2         | 24  | Jul-99 | 7-Mar-11       |
| IL-2 | NCT00020462 | Vaccine Therapy Plus Interleukin-2 in Treating Patients With Stage III, Stage IV, or Recurrent Follicular                                                           | Completed | Lymphoma                                                                                                                      | Biological: aldesleukin Biological: autologous tumor cell vaccine                                                                                                                                   |                                                                                                                                                                                                                                                                                                                                                                          | Phase 1         |     | Feb-01 | April 30, 2015 |
| IL-2 | NCT00003125 | Vaccine Therapy, Interleukin-2, and Sargramostim in Treating Patients With Advanced Tumors                                                                          | Completed | Breast Cancer Esophageal Cancer Gastric Cancer Lung Cancer Pancreatic Cancer Unspecified Adult Solid Tumor, Protocol Specific | Biological: ALVAC-CEA vaccine Biological: aldesleukin Biological: sargramostim Biological: vaccinia-CEA                                                                                             |                                                                                                                                                                                                                                                                                                                                                                          | Phase 2         | 24  | Jan-98 | 24-Mar-11      |
| IL-2 | NCT00002669 | Combination Chemotherapy, Interferon Alfa, and Interleukin-2 in Treating Patients With Metastatic                                                                   | Completed | Melanoma (Skin)                                                                                                               | Biological: aldesleukin Biological: recombinant interferon alfa Drug: cisplatin Drug: dacarbazine                                                                                                   |                                                                                                                                                                                                                                                                                                                                                                          | Phase 2         | 90  | Jun-95 | 2-Jul-12       |
| IL-2 | NCT00045877 | Proleukin in Combination With Rituxan in Patients With Low-Grade Non-Hodgkin's Lymphoma Who Have Previously Failed Rituxan                                          | Completed | Lymphoma, Non-Hodgkin                                                                                                         | Drug: Recombinant Human Interleukin-2 and Rituximab                                                                                                                                                 |                                                                                                                                                                                                                                                                                                                                                                          | Phase 2 Phase 3 |     |        | 6-Feb-06       |
| IL-2 | NCT00045864 | Proleukin in Combination With Rituxan in Patients With Intermediate and High-Grade Non-Hodgkin's                                                                    | Completed | Lymphoma, Non-Hodgkin                                                                                                         | Drug: Recombinant Human Interleukin-2 and Rituximab                                                                                                                                                 |                                                                                                                                                                                                                                                                                                                                                                          | Phase 2         |     |        | 6-Feb-06       |
| IL-2 | NCT00003091 | High-Dose Interferon Alfa and Interleukin-2 in Treating Patients With Metastatic Kidney Cancer or                                                                   | Completed | Kidney Cancer Melanoma (Skin)                                                                                                 | Biological: aldesleukin Biological: recombinant interferon alfa                                                                                                                                     |                                                                                                                                                                                                                                                                                                                                                                          | Phase 2         | 40  | Jan-96 | 12-May-11      |
| IL-2 | NCT00059904 | Rituximab and Interleukin-2 in Treating Patients With Relapsed or Refractory Intermediate- or High-Grade Non-Hodgkin's Lymphoma                                     | Completed | Lymphoma                                                                                                                      | Biological: aldesleukin Biological: rituximab                                                                                                                                                       |                                                                                                                                                                                                                                                                                                                                                                          | Phase 2         |     | Jan-03 | 18-Jul-13      |
| IL-2 | NCT00016237 | Interleukin-2 Combined With Monoclonal Antibody Therapy in Treating Patients With Kidney, Bladder, or Lung Cancer That Has Not Responded to Previous                | Completed | Bladder Cancer Kidney Cancer Lung Cancer                                                                                      | Biological: tuocotuzumab celmoleukin                                                                                                                                                                |                                                                                                                                                                                                                                                                                                                                                                          | Phase 1         |     | Dec-00 | 23-Oct-13      |
| IL-2 | NCT00248430 | Donor White Blood Cell Infusions and Interleukin-2 in Treating Patients Who Are Undergoing an Autologous Stem Cell Transplant for Relapsed Advanced Lymphoid Cancer | Completed | Graft Versus Host Disease Leukemia Lymphoma Multiple Myeloma and Plasma Cell Neoplasm                                         | Biological: aldesleukin Biological: therapeutic allogeneic lymphocytes Drug: melphalan Procedure: bone marrow ablation with stem cell support Procedure: peripheral blood stem cell transplantation | Feasibility Toxicity Extent, degree, and duration of donor chimerism Complete response rate                                                                                                                                                                                                                                                                              | Phase 1 Phase 2 | 20  | Aug-03 | 21-Sep-10      |
| IL-2 | NCT00003027 | Combination Chemotherapy With or Without Interleukin-2 and Interferon Alfa in Treating Patients With Metastatic Melanoma                                            | Completed | Melanoma (Skin)                                                                                                               | Biological: aldesleukin Biological: filgrastim Biological: recombinant interferon alfa Drug: cisplatin Drug: dacarbazine Drug: vinblastine                                                          | Overall survival Response rate (complete and partial response) Durable complete response rate Response duration                                                                                                                                                                                                                                                          | Phase 3         | 482 | Oct-97 | 29-Jan-10      |
| IL-2 | NCT00053807 | Interleukin-2, Interferon Alfa, and Fluorouracil Compared With Observation in Treating Patients Who Have Undergone Surgery for                                      | Completed | Kidney Cancer                                                                                                                 | Biological: aldesleukin Biological: recombinant interferon alfa Drug: fluorouracil Procedure: adjuvant therapy                                                                                      |                                                                                                                                                                                                                                                                                                                                                                          | Phase 3         | 96  | Feb-98 | 24-Sep-12      |
| IL-2 | NCT00002748 | Gene Therapy in Treating Children With Refractory or Recurrent                                                                                                      | Completed | Neuroblastoma                                                                                                                 | Biological: gene-modified tumor cell vaccine therapy Biological: interleukin-2                                                                                                                      |                                                                                                                                                                                                                                                                                                                                                                          | Phase 1         | 38  | Dec-91 | 4-Oct-11       |
| IL-2 | NCT00006264 | Zidovudine Plus Interleukin-2 and Ganciclovir in Treating Patients With AIDS-Related Primary Central Nervous System Lymphoma                                        | Completed | Lymphoma                                                                                                                      | Biological: aldesleukin Drug: ganciclovir Drug: zidovudine                                                                                                                                          |                                                                                                                                                                                                                                                                                                                                                                          | Phase 2         |     | Jul-00 | 3-Feb-16       |

|      |             |                                                                                                                                                                                                                                |           |                                                                                                                                                       |                                                                                                                                                                                                                                                                                                                                               |                                                                                                                                                                                                                                                                                                                                                                              |                 |     |           |                |
|------|-------------|--------------------------------------------------------------------------------------------------------------------------------------------------------------------------------------------------------------------------------|-----------|-------------------------------------------------------------------------------------------------------------------------------------------------------|-----------------------------------------------------------------------------------------------------------------------------------------------------------------------------------------------------------------------------------------------------------------------------------------------------------------------------------------------|------------------------------------------------------------------------------------------------------------------------------------------------------------------------------------------------------------------------------------------------------------------------------------------------------------------------------------------------------------------------------|-----------------|-----|-----------|----------------|
| IL-2 | NCT00053820 | Interferon Alfa With or Without Interleukin-2 and Fluorouracil in Treating Patients With Advanced                                                                                                                              | Completed | Kidney Cancer                                                                                                                                         | Biological: aldesleukin Biological: recombinant interferon alfa Drug: fluorouracil                                                                                                                                                                                                                                                            | Survival Time to progression as measured by RECIST criteria Comparison of toxicity levels (Grade III and IV) Comparison of quality of life before, during, after completion of study treatment Impact of the treatment regimens on health economics                                                                                                                          | Phase 3         | 670 | Jul-02    | 19-Dec-13      |
| IL-2 | NCT00325507 | Study to Evaluate Safety and Biological Activity of TroVax® Vaccine Given in Conjunction With IL-2 to Treat Locally Advanced or Metastatic Renal Cell Carcinoma                                                                | Completed | Carcinoma, Renal Cell                                                                                                                                 | Biological: TroVax®                                                                                                                                                                                                                                                                                                                           |                                                                                                                                                                                                                                                                                                                                                                              | Phase 2         | 25  | Nov-05    | 1-Aug-08       |
| IL-2 | NCT00002945 | High Dose Chemotherapy, Peripheral Stem Cell Transplantation, and Interleukin-2 in Treating Patients With Acute Myeloid Leukemia                                                                                               | Completed | Leukemia                                                                                                                                              | Biological: aldesleukin Biological: filgrastim Drug: cyclophosphamide Drug: cytarabine Drug: etoposide Drug: idarubicin Drug: melphalan Procedure: peripheral blood stem cell                                                                                                                                                                 | To determine the efficacy of 4-6 h and 18-24 h, 20% ALA applications on superficial and nodular epidermally-derived lesions using ca633 nm laser irradiation.                                                                                                                                                                                                                | Phase 3         | 61  | Dec-96    | April 13, 2012 |
| IL-2 | NCT00004141 | Combination Chemotherapy Plus Biological Therapy in Treating Patients With Metastatic Melanoma                                                                                                                                 | Completed | Melanoma (Skin)                                                                                                                                       | Drug: Cisplatin Drug: dacarbazine Drug: Granulocyte-macrophage colony-stimulating factor                                                                                                                                                                                                                                                      | Objective response rate                                                                                                                                                                                                                                                                                                                                                      | Phase 2         | 46  | Aug-98    | 5-Sep-13       |
| IL-2 | NCT00001430 | A Randomized Study of EPOCH II Versus EPOCH II and Immunotherapy in Lymphomas                                                                                                                                                  | Completed | Hodgkin's Disease Non Hodgkin's Lymphoma                                                                                                              | Procedure: PBSC Drug: IL-2 Drug: EPOCH II                                                                                                                                                                                                                                                                                                     |                                                                                                                                                                                                                                                                                                                                                                              | Phase 2         | 49  | Feb-95    | 4-Mar-08       |
| IL-2 | NCT00003615 | Denileukin Diftitox in Treating Patients With Non-Hodgkin's                                                                                                                                                                    | Completed | Lymphoma                                                                                                                                              | Biological: denileukin diftitox                                                                                                                                                                                                                                                                                                               |                                                                                                                                                                                                                                                                                                                                                                              | Phase 2         | 77  | Mar-99    | 28-Jan-10      |
| IL-2 | NCT00640796 | Pilot Study of Expanded, Donor Natural Killer Cell Infusions for Refractory Non-B Lineage Hematologic Malignancies and Solid                                                                                                   | Completed | Leukemia, Myeloid, Acute Leukemia, Lymphocytic, Acute, T-Cell Juvenile Myelomonocytic Leukemia Lymphoblastic T-cell Lymphoma Myelodysplastic Syndrome | Procedure: Haploidentical donor derived natural killer cell infusion Drug: Chemotherapy Device: CliniMACS                                                                                                                                                                                                                                     | To determine the maximum tolerated dose of expanded NK cells in research participants with relapsed or refractory hematologic malignancies and sarcomas.                                                                                                                                                                                                                     | Phase 1         | 22  | Sep-08    | April 24, 2014 |
| IL-2 | NCT00020267 | Vaccine Therapy in Treating Patients With Metastatic Cancer                                                                                                                                                                    | Completed | Lung Cancer Adult Soft Tissue Sarcoma Colorectal Cancer Bone Cancer Ovarian Sarcoma Melanoma Colon Cancer Rectal Cancer Breast Cancer Eye             | Drug: interleukin-2 Drug: MAGE-12 peptide vaccine Drug: Montanide ISA-51                                                                                                                                                                                                                                                                      |                                                                                                                                                                                                                                                                                                                                                                              | Phase 1         |     | Jul-00    | April 28, 2015 |
| IL-2 | NCT00020475 | Vaccine Therapy in Treating Patients With Metastatic Melanoma of the Eye                                                                                                                                                       | Completed | Extraocular Extension Melanoma Recurrent Intraocular Melanoma                                                                                         | Drug: gp100 antigen Drug: interleukin-2 Drug: MART-1 antigen Drug: Montanide                                                                                                                                                                                                                                                                  |                                                                                                                                                                                                                                                                                                                                                                              | Phase 2         |     | Feb-01    | 16-Aug-13      |
| IL-2 | NCT00070187 | Immunotherapy Using Cyclosporine, Interferon Gamma, and Interleukin-2 After High-Dose Myeloablative Chemotherapy With Autologous Stem Cell Transplantation in Treating Patients With Refractory or Relapsed Hodgkin's Lymphoma | Completed | Lymphoma                                                                                                                                              | Biological: aldesleukin Biological: filgrastim Biological: recombinant interferon gamma Drug: carmustine Drug: cyclosporine Drug: cytarabine Drug: etoposide Drug: melphalan Procedure: autologous bone marrow transplantation Procedure: bone marrow ablation with stem cell support Procedure: peripheral blood stem cell transplantation   | Incidence of death, excluding death due to disease, during the period of time from day 0 (transplant) through day 100 post transplant                                                                                                                                                                                                                                        | Phase 2 Phase 3 | 24  | Nov-03    | 17-Oct-13      |
| IL-2 | NCT00014092 | Chemotherapy Followed by Biological Therapy in Treating Patients With Stage IV Melanoma That Cannot be Treated With                                                                                                            | Completed | Melanoma (Skin)                                                                                                                                       | Biological: aldesleukin Biological: recombinant interferon alfa Biological: sargramostim Drug: temozolomide                                                                                                                                                                                                                                   |                                                                                                                                                                                                                                                                                                                                                                              | Phase 2         |     | Dec-99    | 26-Mar-13      |
| IL-2 | NCT00005948 | Chemotherapy Followed by Peripheral Stem Cell Transplantation And Biological Therapy in Treating Patients With Chronic Myelogenous                                                                                             | Completed | Leukemia                                                                                                                                              | Biological: aldesleukin Biological: recombinant interferon alfa Biological: sargramostim Drug: busulfan Procedure: peripheral blood stem cell transplantation                                                                                                                                                                                 |                                                                                                                                                                                                                                                                                                                                                                              | Phase 2         |     | Jan-00    | April 2, 2010  |
| IL-2 | NCT00402558 | Alloreactive NK Cells for Allogeneic Stem Cell Transplantation for Acute Myeloid Leukemia (AML) and Myelodysplastic Syndrome (MDS)                                                                                             | Completed | Myelodysplastic Syndrome Leukemia                                                                                                                     | Drug: Thymoglobulin Drug: Busulfan Drug: Fludarabine Procedure: Alloreactive NK Infusion Drug: G-CSF Drug: Tacrolimus Drug: Methotrexate Drug:                                                                                                                                                                                                | Maximum Tolerated Dose of NK cells                                                                                                                                                                                                                                                                                                                                           | Phase 1         | 15  | May-06    | 8-May-15       |
| IL-2 | NCT00027937 | Combination Chemotherapy, Peripheral Stem Cell Transplantation, and Biological Therapy in Treating Patients With Solid Tumors or Lymphoma                                                                                      | Completed | Lymphoma Unspecified Adult Solid Tumor, Protocol Specific Unspecified Childhood Solid Tumor, Protocol Specific                                        | Biological: aldesleukin Biological: filgrastim Biological: sargramostim Drug: busulfan Drug: cyclophosphamide Drug: melphalan Drug: paclitaxel Drug: thiotepa Procedure: bone marrow ablation with stem cell support Procedure: in vitro-treated peripheral blood stem cell                                                                   |                                                                                                                                                                                                                                                                                                                                                                              | Phase 2         |     | Aug-01    | 14-May-10      |
| IL-2 | NCT02130869 | A Pilot Study of Immunotherapy Including Haploidentical NK Cell Infusion Following CD133+ Positively-Selected Autologous Hematopoietic Stem Cells in Children With High Risk Solid Tumors or Lymphomas                         | Completed | Neuroblastoma Lymphoma High-risk Tumor                                                                                                                | Biological: CD133+ selected autologous stem cell infusion Biological: IL-2 Biological: hu14.18K322A Drug: Busulfan Drug: Melphalan Biological: GM-CSF Drug: Bendamustine Drug: Etoposide Drug: Cytarabine Drug: Carboplatin Device: Haploidentical natural killer cell infusion Biological: G-CSF Drug: Etoposide phosphate Device: CliniMACS | Percent of participants with positive ANC engraftment Overall survival Disease-free survival Incidence of relapse Lymphocyte and hematopoietic reconstitution Characteristics of the stem cell grafts Characteristics of the natural killer cell grafts. Overall survival of patients treated without stem cell manipulation or NK cell infusion due to off therapy criteria | Phase 1         | 8   | 10-Oct-14 | 22-Dec-17      |

|      |             |                                                                                                                                                               |           |                                                                                                                                                                                                                                                                                                                                                                                                                                                                                                                                                                                                                                                                                                                                                                                                                                                                                                                                                                                                                                                                                                                                                                                                                                                                                                                                                                                                                            |                                                                                                                                                                                                                                                                                                                              |                                                                                                                                                                                                                                                                                                                                                                                                                                                                                                                        |                 |     |            |                |
|------|-------------|---------------------------------------------------------------------------------------------------------------------------------------------------------------|-----------|----------------------------------------------------------------------------------------------------------------------------------------------------------------------------------------------------------------------------------------------------------------------------------------------------------------------------------------------------------------------------------------------------------------------------------------------------------------------------------------------------------------------------------------------------------------------------------------------------------------------------------------------------------------------------------------------------------------------------------------------------------------------------------------------------------------------------------------------------------------------------------------------------------------------------------------------------------------------------------------------------------------------------------------------------------------------------------------------------------------------------------------------------------------------------------------------------------------------------------------------------------------------------------------------------------------------------------------------------------------------------------------------------------------------------|------------------------------------------------------------------------------------------------------------------------------------------------------------------------------------------------------------------------------------------------------------------------------------------------------------------------------|------------------------------------------------------------------------------------------------------------------------------------------------------------------------------------------------------------------------------------------------------------------------------------------------------------------------------------------------------------------------------------------------------------------------------------------------------------------------------------------------------------------------|-----------------|-----|------------|----------------|
| IL-2 | NCT00006363 | Combination Chemotherapy With or Without PSC 833, Peripheral Stem Cell Transplantation, and/or Interleukin-2 in Treating Patients With Acute Myeloid Leukemia | Completed | Adult Acute Basophilic Leukemia Adult Acute Eosinophilic Leukemia Adult Acute Erythroid Leukemia (M6) Adult Acute Megakaryoblastic Leukemia (M7) Adult Acute Minimally Differentiated Myeloid Leukemia (M0) Adult Acute Monoblastic Leukemia (M5a) Adult Acute Monoblastic Leukemia and Acute Monocytic Leukemia (M5) Adult Acute Monocytic Leukemia (M5b) Adult Acute Myeloblastic Leukemia With Maturation (M2) Adult Acute Myeloblastic Leukemia Without Maturation (M1) Adult Acute Myeloid Leukemia With 11q23 (MLL) Abnormalities Adult Acute Myeloid Leukemia With Del(5q) Adult Acute Myeloid Leukemia With Inv(16)(p13;q22) Adult Acute Myeloid Leukemia With t(16;16)(p13;q22) Adult Acute Myeloid Leukemia With t(8;21)(q22;q22) Adult Acute Myelomonocytic Leukemia (M4) Adult Erythroleukemia (M6a) Adult Pure Erythroid Leukemia (M6b) Childhood Acute Basophilic Leukemia Childhood Acute Eosinophilic Leukemia Childhood Acute Erythroleukemia (M6) Childhood Acute Megakaryocytic Leukemia (M7) Childhood Acute Minimally Differentiated Myeloid Leukemia (M0) Childhood Acute Monoblastic Leukemia (M5a) Childhood Acute Monoblastic Leukemia and Acute Monocytic Leukemia (M5) Childhood Acute Monocytic Leukemia (M5b) Childhood Acute Myeloblastic Leukemia With Maturation (M2) Childhood Acute Myeloblastic Leukemia Without Maturation (M1) Childhood Acute Myelomonocytic Leukemia (M4) Childhood | Drug: cytarabine Drug: daunorubicin hydrochloride Drug: etoposide Drug: valspodar Biological: filgrastim Drug: busulfan Procedure: autologous hematopoietic stem cell transplantation Procedure: peripheral blood stem cell transplantation Biological: aldesleukin Other: clinical observation Other: pharmacological study | Disease-free survival Overall survival Estimates of disease-free survival curves Estimates of overall survival curves Toxicities and adverse events assessed using National Cancer Institute (NCI) Common Toxicity Criteria (CTC)                                                                                                                                                                                                                                                                                      | Phase 3         | 720 | Nov-00     | 4-Jun-13       |
| IL-2 | NCT01339663 | Vaccine Therapy Following Therapeutic Autologous Lymphocytes and Cyclophosphamide in Treating Patients With Metastatic Melanoma                               | Completed | Recurrent Melanoma Stage IV Melanoma                                                                                                                                                                                                                                                                                                                                                                                                                                                                                                                                                                                                                                                                                                                                                                                                                                                                                                                                                                                                                                                                                                                                                                                                                                                                                                                                                                                       | Drug: cyclophosphamide Biological: aldesleukin Biological: autologous tumor cell vaccine Other: laboratory biomarker analysis Other: immunologic technique Other: immunohistochemistry staining method Genetic: polymerase chain reaction Biological: therapeutic autologous                                                 | Treatment-related dose limiting toxicity (DLT) as defined by Grade 3 or greater unexpected toxicity by the NCI Common Toxicity Criteria (CTC) v4.0 In vivo persistence of adoptively transferred T cells Clinical response                                                                                                                                                                                                                                                                                             | Phase 1         | 12  | Mar-12     | April 21, 2014 |
| IL-2 | NCT00676949 | Safety Study of Cancer Specific Epitope Peptides Cocktail for Cervical, GI, and Lung Tumors                                                                   | Completed | Metastatic Tumors                                                                                                                                                                                                                                                                                                                                                                                                                                                                                                                                                                                                                                                                                                                                                                                                                                                                                                                                                                                                                                                                                                                                                                                                                                                                                                                                                                                                          | Biological: 5 peptide vaccines of KOC1, TTK, CO16, DEPDC1, MPHOSPH1                                                                                                                                                                                                                                                          | safety of the cyclophosphamide combined tumor specific epitope peptide cocktail immunological efficacies and clinical efficacies of the cyclophosphamide combined tumor specific epitope peptides cocktail                                                                                                                                                                                                                                                                                                             | Phase 1         | 18  | Nov-07     | 23-Jun-11      |
| IL-2 | NCT00197912 | Dendritic Cell Based Therapy of Malignant Melanoma                                                                                                            | Completed | Advanced Melanoma                                                                                                                                                                                                                                                                                                                                                                                                                                                                                                                                                                                                                                                                                                                                                                                                                                                                                                                                                                                                                                                                                                                                                                                                                                                                                                                                                                                                          | Biological: tumor antigen loaded autologous dendritic cells                                                                                                                                                                                                                                                                  | Primary aim of the study is to evaluate tolerability and safety of the treatment Secondary aims: evaluation of treatment induced immune response and clinical response.                                                                                                                                                                                                                                                                                                                                                | Phase 1 Phase 1 | 25  | Sep-04     | April 26, 2010 |
| IL-2 | NCT00617799 | Biomarkers That Predict Response to High-Dose Aldesleukin in Patients With Metastatic Kidney Cancer or Metastatic Melanoma                                    | Completed | Kidney Cancer Melanoma (Skin)                                                                                                                                                                                                                                                                                                                                                                                                                                                                                                                                                                                                                                                                                                                                                                                                                                                                                                                                                                                                                                                                                                                                                                                                                                                                                                                                                                                              | Biological: aldesleukin Genetic: gene expression analysis Genetic: mutation analysis Other: flow cytometry                                                                                                                                                                                                                   | Relationship of peripheral blood lymphocyte phenotype to response to high-dose aldesleukin (IL-2) Relationship of peripheral blood mononuclear cells gene microarray patterns to response to high-dose IL-2 Frequency of mutations on genes encoding IL-2 receptor A and B                                                                                                                                                                                                                                             |                 | 15  | Oct-07     | April 2, 2018  |
| IL-2 | NCT00357448 | Denileukin Diftitox Used in Treating Patients With Advanced Refractory Ovarian Cancer, Primary Peritoneal Carcinoma, or Epithelial Fallopian Tube Cancer      | Completed | Fallopian Tube Cancer Ovarian Clear Cell Cystadenocarcinoma Ovarian Endometrioid Adenocarcinoma Ovarian Mixed Epithelial Carcinoma Ovarian Mucinous Cystadenocarcinoma Ovarian Serous Cystadenocarcinoma Ovarian Undifferentiated Adenocarcinoma Peritoneal Cavity Cancer Recurrent Ovarian Epithelial Cancer Stage III Ovarian Epithelial                                                                                                                                                                                                                                                                                                                                                                                                                                                                                                                                                                                                                                                                                                                                                                                                                                                                                                                                                                                                                                                                                 | Biological: denileukin diftitox Procedure: intraperitoneal administration Other: laboratory biomarker analysis Other: enzyme-linked immunosorbent assay Other: flow cytometry                                                                                                                                                | Safety and toxicity profile as assessed by the Cancer Therapy Evaluation Program, Common Terminology Criteria for Adverse Events version 3.0 MTD Efficacy of ONTAK defined as a 25% reduction in the number of Tregs in either the peripheral blood and/or in the peritoneal cavity Clinical impact on course of disease as assessed by serum CA-125 measurements Changes in circulating cytokines IL-2, IL-6, IL-10, TGF-beta2, and TNF-alpha in the peripheral blood and at the site of disease as measured by ELISA | Phase 1         | 11  | April 2005 | 14-May-19      |
| IL-2 | NCT00019331 | Vaccine Therapy Plus Biological Therapy in Treating Adults With Metastatic Solid Tumors                                                                       | Completed | Colorectal Cancer Endometrial Cancer Head and Neck Cancer Liver Cancer Lung Cancer Melanoma (Skin) Pancreatic Cancer Testicular Germ Cell Tumor Unspecified Adult Solid Tumor, Protocol Specific                                                                                                                                                                                                                                                                                                                                                                                                                                                                                                                                                                                                                                                                                                                                                                                                                                                                                                                                                                                                                                                                                                                                                                                                                           | Biological: aldesleukin Biological: ras peptide cancer vaccine Biological: sargramostim Drug: DetoxPC                                                                                                                                                                                                                        |                                                                                                                                                                                                                                                                                                                                                                                                                                                                                                                        | Phase 2         |     | Oct-97     | 20-Jun-13      |
| IL-2 | NCT00019032 | Monoclonal Antibody Therapy in Treating Patients With Chronic Lymphocytic Leukemia                                                                            | Completed | Leukemia                                                                                                                                                                                                                                                                                                                                                                                                                                                                                                                                                                                                                                                                                                                                                                                                                                                                                                                                                                                                                                                                                                                                                                                                                                                                                                                                                                                                                   | Biological: monoclonal antibody Mik-beta-1                                                                                                                                                                                                                                                                                   |                                                                                                                                                                                                                                                                                                                                                                                                                                                                                                                        | Phase 1         | 25  | Mar-96     | April 28, 2015 |
| IL-2 | NCT00057889 | Monoclonal Antibody Therapy in Treating Patients With Metastatic Renal Cell Cancer                                                                            | Completed | Kidney Cancer                                                                                                                                                                                                                                                                                                                                                                                                                                                                                                                                                                                                                                                                                                                                                                                                                                                                                                                                                                                                                                                                                                                                                                                                                                                                                                                                                                                                              | Biological: ipilimumab                                                                                                                                                                                                                                                                                                       |                                                                                                                                                                                                                                                                                                                                                                                                                                                                                                                        | Phase 2         |     | Feb-03     | 15-Mar-12      |
| IL-2 | NCT00588913 | Adoptive Immunotherapy, Aldesleukin, and Zoledronate in Treating Patients With Stage IV Kidney Cancer and Lung Metastases                                     | Completed | Kidney Cancer Metastatic Cancer                                                                                                                                                                                                                                                                                                                                                                                                                                                                                                                                                                                                                                                                                                                                                                                                                                                                                                                                                                                                                                                                                                                                                                                                                                                                                                                                                                                            | Biological: aldesleukin Biological: therapeutic autologous lymphocytes Drug: zoledronic acid                                                                                                                                                                                                                                 | Frequency and severity of adverse events based on NCI-CTCAE version 3.0 Proportion of gd T-cells in peripheral blood Secondary doubling time of tumor growth Overall response                                                                                                                                                                                                                                                                                                                                          | Phase 1 Phase 2 | 20  | Jan-06     | 10-Jul-13      |
| IL-2 | NCT00076180 | Hu-Mik-beta1 to Treat T-Cell Large Granular Lymphocytic Leukemia                                                                                              | Completed | T-Cell Large Granular Lymphocytic Leukemia Leukemia, T-Cell Large Granular Lymphocytic                                                                                                                                                                                                                                                                                                                                                                                                                                                                                                                                                                                                                                                                                                                                                                                                                                                                                                                                                                                                                                                                                                                                                                                                                                                                                                                                     | Biological: Hu-MiK-Beta-1                                                                                                                                                                                                                                                                                                    | DLT and MTD of Hu MIK Beta 1                                                                                                                                                                                                                                                                                                                                                                                                                                                                                           | Phase 1         | 9   | 1-Mar-04   | 11-Jan-19      |

|      |             |                                                                                                                                                                                                                                                            |           |                                                                                                                                                                                                                                                                                               |                                                                                                                                                                                                                                                                                                                                                                                                                                                                             |                                                                                                                                                                                                                                                                                                                                                                                                                                                                                                                                                                                                                                                                                                                                                                                                                                                                                                                                                                                                                                                                                           |                 |     |            |                |
|------|-------------|------------------------------------------------------------------------------------------------------------------------------------------------------------------------------------------------------------------------------------------------------------|-----------|-----------------------------------------------------------------------------------------------------------------------------------------------------------------------------------------------------------------------------------------------------------------------------------------------|-----------------------------------------------------------------------------------------------------------------------------------------------------------------------------------------------------------------------------------------------------------------------------------------------------------------------------------------------------------------------------------------------------------------------------------------------------------------------------|-------------------------------------------------------------------------------------------------------------------------------------------------------------------------------------------------------------------------------------------------------------------------------------------------------------------------------------------------------------------------------------------------------------------------------------------------------------------------------------------------------------------------------------------------------------------------------------------------------------------------------------------------------------------------------------------------------------------------------------------------------------------------------------------------------------------------------------------------------------------------------------------------------------------------------------------------------------------------------------------------------------------------------------------------------------------------------------------|-----------------|-----|------------|----------------|
| IL-2 | NCT02004106 | A Study to Evaluate Safety, Pharmacokinetics, and Efficacy of RO6895882 in Participants With Advanced and/or Metastatic Solid Tumors                                                                                                                       | Completed | Neoplasms                                                                                                                                                                                                                                                                                     | Drug: RO6895882                                                                                                                                                                                                                                                                                                                                                                                                                                                             | Part 2: Percentage of Participants With Dose-Limiting Toxicity (DLT) Part 2: MTD of RO6895882 Percentage of Participants With Adverse Events Percentage of Participants With Anti-drug Antibodies (ADAs) Against RO6895882 Area Under the Serum Concentration-Time Curve (AUC) of RO6895882 Minimum Observed Serum Concentration (Cmin) of RO6895882 Maximum Observed Serum Concentration (Cmax) of RO6895882 Clearance (CL) of RO6895882 Volume of Distribution at Steady State (Vss) of RO6895882 Half-life (t1/2) of RO6895882 Count of Cluster of Differentiation (CD) 4+ Cells Analyzed by Flow Cytometry Count of CD8+ Cells Analyzed by Flow Cytometry Count of B Lymphocyte Cells Analyzed by Flow Cytometry Count of Natural Killer (NK) Cells Analyzed by Flow Cytometry Count of Monocytes Cells Analyzed by Flow Cytometry Percentage of Participants With Objective Response Assessed According to Response Evaluation Criteria in Solid Tumors (RECIST) Version 1.1 (v 1.1) Percentage of Participants With Stable Disease Assessed According to RECIST v 1.1 Percentage of | Phase 1         | 110 | 31-Dec-13  | 6-Mar-18       |
| IL-2 | NCT00019084 | Vaccine Therapy and Biological Therapy in Treating Patients With Advanced Cancer                                                                                                                                                                           | Completed | Breast Cancer Cervical Cancer Colorectal Cancer Lung Cancer Ovarian Cancer Pancreatic Cancer                                                                                                                                                                                                  | Biological: aldesleukin Biological: mutant p53 peptide pulsed dendritic cell vaccine Biological: ras peptide cancer vaccine Biological: sargramostim Biological: therapeutic autologous lymphocytes Biological: therapeutic tumor                                                                                                                                                                                                                                           |                                                                                                                                                                                                                                                                                                                                                                                                                                                                                                                                                                                                                                                                                                                                                                                                                                                                                                                                                                                                                                                                                           | Phase 2         |     | Feb-96     | 20-Jun-13      |
| IL-2 | NCT00057616 | Study to Compare the Efficacy and Safety of CC-5013 vs. Placebo in Subjects With Metastatic Malignant                                                                                                                                                      | Completed | Melanoma Neoplasm Metastasis                                                                                                                                                                                                                                                                  | Drug: CC-5013                                                                                                                                                                                                                                                                                                                                                                                                                                                               |                                                                                                                                                                                                                                                                                                                                                                                                                                                                                                                                                                                                                                                                                                                                                                                                                                                                                                                                                                                                                                                                                           | Phase 3         | 274 | 1-Oct-02   | 8-Nov-19       |
| IL-2 | NCT00055562 | Study to Compare the Efficacy and Safety of Two CC-5013 Dose Regimens in Subjects With Metastatic Malignant Melanoma                                                                                                                                       | Completed | Melanoma Neoplasm Metastasis                                                                                                                                                                                                                                                                  | Drug: CC 5013                                                                                                                                                                                                                                                                                                                                                                                                                                                               |                                                                                                                                                                                                                                                                                                                                                                                                                                                                                                                                                                                                                                                                                                                                                                                                                                                                                                                                                                                                                                                                                           | Phase 2 Phase 3 | 274 | Jan-03     | 24-Jun-05      |
| IL-2 | NCT00051012 | Study of ONTAK (Denileukin Diftitox) in Previously Treated Cutaneous T-Cell Lymphoma Patients                                                                                                                                                              | Completed | Lymphoma, T-Cell, Cutaneous Mycosis                                                                                                                                                                                                                                                           | Drug: ONTAK                                                                                                                                                                                                                                                                                                                                                                                                                                                                 | Objective Rate of Response (ORR), defined as CR + CCR + PR Time-to-Treatment Failure Time-to-Progression Duration of Response                                                                                                                                                                                                                                                                                                                                                                                                                                                                                                                                                                                                                                                                                                                                                                                                                                                                                                                                                             | Phase 4         | 86  | Sep-95     | 5-Mar-08       |
| IL-2 | NCT00050999 | Study of ONTAK (Denileukin Diftitox) in Cutaneous T-Cell Lymphoma (CTCL) Patients                                                                                                                                                                          | Completed | Lymphoma, T-Cell, Cutaneous Mycosis                                                                                                                                                                                                                                                           | Drug: ONTAK                                                                                                                                                                                                                                                                                                                                                                                                                                                                 | Objective Rate of Response (ORR), defined as CR + CCR + PR Time-to-Treatment Failure Time-to-Progression Duration of Response                                                                                                                                                                                                                                                                                                                                                                                                                                                                                                                                                                                                                                                                                                                                                                                                                                                                                                                                                             | Phase 4         | 195 | Jun-95     | 5-Mar-08       |
| IL-2 | NCT00228358 | Cyclophosphamide or Denileukin Diftitox Followed By Expanding a Patient's Own T Cells in the Laboratory in Treating Patients With HER-2/Neu Overexpressing Metastatic Breast Cancer, Ovarian Cancer, or Non-Small Cell Lung Cancer Previously Treated With | Completed | HER2-positive Breast Cancer Recurrent Breast Cancer Recurrent Non-small Cell Lung Cancer Recurrent Ovarian Epithelial Cancer Recurrent Ovarian Germ Cell Tumor Stage IV Breast Cancer Stage IV Non-small Cell Lung Cancer Stage IV Ovarian Epithelial Cancer Stage IV Ovarian Germ Cell Tumor | Drug: ex vivo-expanded HER2-specific T cells Drug: cyclophosphamide Biological: denileukin diftitox Other: flow cytometry Other: immunoenzyme technique                                                                                                                                                                                                                                                                                                                     | Feasibility of expanding HER2 specific T cells ex vivo to achieve a target T cell expansion of 1x10^10 HER2 specific T cells Safety of infusing HER2 specific T cells Number of patients in whom the precursor frequency of antigen specific T cells is increased by 10-fold over baseline within one week after the last infusion Number of patients in whom an immune response is demonstrated if baseline immune response was below detection HER2 specific CD4+ or CD8+ precursor frequencies as assessed by cytokine flow cytometry or ELISPOT Anti-tumor effects of HER2 specific T cells as assessed by RECIST criteria Persistence of T cell immune augmentation in vivo after adoptive transfer                                                                                                                                                                                                                                                                                                                                                                                  | Phase 1         | 8   | Jun-03     | 11-Nov-14      |
| IL-2 | NCT00416871 | Interleukin-2 and Interferon in Treating Patients With Metastatic                                                                                                                                                                                          | Completed | Kidney Cancer                                                                                                                                                                                                                                                                                 | Biological: aldesleukin Biological: recombinant interferon alfa                                                                                                                                                                                                                                                                                                                                                                                                             |                                                                                                                                                                                                                                                                                                                                                                                                                                                                                                                                                                                                                                                                                                                                                                                                                                                                                                                                                                                                                                                                                           | Phase 3         | 220 |            | 26-Sep-12      |
| IL-2 | NCT00019357 | Interleukin-2 Plus Activated White Blood Cells in Treating Patients With Cancer That Has Not Responded to Chemotherapy or Radiation Therapy                                                                                                                | Completed | Unspecified Adult Solid Tumor, Protocol Specific                                                                                                                                                                                                                                              | Biological: aldesleukin Biological: therapeutic autologous lymphocytes Biological: therapeutic tumor infiltrating lymphocytes                                                                                                                                                                                                                                                                                                                                               |                                                                                                                                                                                                                                                                                                                                                                                                                                                                                                                                                                                                                                                                                                                                                                                                                                                                                                                                                                                                                                                                                           | Phase 1         |     | Jun-98     | April 29, 2015 |
| IL-2 | NCT00002681 | Monoclonal Antibody Plus Interleukin-2 in Treating Patients With Leukemia or Lymphoma                                                                                                                                                                      | Completed | Leukemia Lymphoma                                                                                                                                                                                                                                                                             | Biological: aldesleukin Biological: daclizumab                                                                                                                                                                                                                                                                                                                                                                                                                              |                                                                                                                                                                                                                                                                                                                                                                                                                                                                                                                                                                                                                                                                                                                                                                                                                                                                                                                                                                                                                                                                                           | Phase 1 Phase 2 | 25  | Jul-95     | 10-Jun-11      |
| IL-2 | NCT00112242 | Immunotherapy of Stage III/IV Melanoma Patients                                                                                                                                                                                                            | Completed | Melanoma                                                                                                                                                                                                                                                                                      | Biological: Montanide + Melan-A analogue peptide Biological: Montanide + Melan-A analog peptide + NY-ESO-1 analog peptide + Mage10 peptide Biological: Montanide + CpG-7909 / PF-3512676+Melan-A analog peptide + NY-ESO-1 analog peptide + Mage10 peptide Biological: Montanide + CpG-7909/PF-3512676 + Melan-A native and analog peptides + NY-ESO-1 long peptide + Mage10 peptide Biological: Montanide + CpG-7909/PF-3512676 + Melan-A native and analog peptides + NY- | Safety of the vaccination will be assessed according to the National Cancer Institute Common Toxicity Criteria (NCI CTC) scale Immune response induced by vaccination with melanoma antigen peptides will be determined In patients with measurable disease, tumor response will be assessed by radiology                                                                                                                                                                                                                                                                                                                                                                                                                                                                                                                                                                                                                                                                                                                                                                                 | Phase 1         | 38  | Feb-04     | April 22, 2013 |
| IL-2 | NCT00019721 | Vaccine Therapy With or Without Interleukin-2 in Treating Patients With Metastatic Melanoma                                                                                                                                                                | Completed | Melanoma (Skin)                                                                                                                                                                                                                                                                               | Biological: MART-1 antigen Biological: aldesleukin Biological: gp100 antigen Biological: incomplete Freund's                                                                                                                                                                                                                                                                                                                                                                |                                                                                                                                                                                                                                                                                                                                                                                                                                                                                                                                                                                                                                                                                                                                                                                                                                                                                                                                                                                                                                                                                           | Phase 2         |     | April 1999 | 20-Jun-13      |
| IL-2 | NCT00019669 | Vaccine Therapy With or Without Interleukin-2 in Treating Patients With Metastatic Melanoma                                                                                                                                                                | Completed | Melanoma (Skin)                                                                                                                                                                                                                                                                               | Biological: aldesleukin Biological: fowlpox virus vaccine vector Biological: gp100 antigen                                                                                                                                                                                                                                                                                                                                                                                  |                                                                                                                                                                                                                                                                                                                                                                                                                                                                                                                                                                                                                                                                                                                                                                                                                                                                                                                                                                                                                                                                                           | Phase 2         |     | Oct-99     | 20-Jun-13      |

|      |             |                                                                                                                                                                                   |           |                                         |                                                                                                                                                                                                                                                                                                        |                                                                                                                                                                                                                                                                                                                                                                                                                |                 |     |            |                |
|------|-------------|-----------------------------------------------------------------------------------------------------------------------------------------------------------------------------------|-----------|-----------------------------------------|--------------------------------------------------------------------------------------------------------------------------------------------------------------------------------------------------------------------------------------------------------------------------------------------------------|----------------------------------------------------------------------------------------------------------------------------------------------------------------------------------------------------------------------------------------------------------------------------------------------------------------------------------------------------------------------------------------------------------------|-----------------|-----|------------|----------------|
| IL-2 | NCT00019487 | Vaccine Therapy With or Without Interleukin-2 in Treating Patients With Metastatic Melanoma                                                                                       | Completed | Melanoma (Skin)                         | Biological: aldesleukin Biological: gp209-2M antigen Biological: incomplete Freund's adjuvant                                                                                                                                                                                                          |                                                                                                                                                                                                                                                                                                                                                                                                                | Phase 2         |     | Nov-98     | 20-Jun-13      |
| IL-2 | NCT00019214 | Vaccine Therapy With or Without Interleukin-2 in Treating Patients With Metastatic Melanoma                                                                                       | Completed | Melanoma (Skin)                         | Biological: MART-1 antigen Biological: aldesleukin Biological: gp100 antigen                                                                                                                                                                                                                           |                                                                                                                                                                                                                                                                                                                                                                                                                | Phase 1 Phase 2 |     | April 1997 | 20-Jun-13      |
| IL-2 | NCT00019916 | Vaccine Therapy Plus Interleukin-2 in Treating Women With Stage IV, Recurrent, or Progressive Breast or Ovarian Cancer                                                            | Completed | Breast Cancer Ovarian Cancer            | Biological: aldesleukin Biological: p53 peptide vaccine Procedure: in vitro-treated peripheral blood stem cell transplantation                                                                                                                                                                         | Cellular immunity as measured by Elispot assay and 51 Cr-release assay at baseline, and every 3 weeks Toxicity as measured by CTC v2.0 at baseline, and every 3 weeks Tumor response as measured by CT scan at baseline, and every 3 months                                                                                                                                                                    | Phase 1 Phase 2 |     | Jun-00     | 20-Jun-13      |
| IL-2 | NCT00019175 | Vaccine Therapy With or Without Interleukin-2 in Treating Patients With Recurrent Metastatic Melanoma                                                                             | Completed | Melanoma (Skin)                         | Biological: aldesleukin Biological: fowlpox virus vaccine vector Biological: gp100 antigen                                                                                                                                                                                                             |                                                                                                                                                                                                                                                                                                                                                                                                                | Phase 1         |     | Aug-96     | April 29, 2015 |
| IL-2 | NCT01029873 | QUILT-2.008: Study of ALT-801 With Cisplatin in Patients With Metastatic Melanoma                                                                                                 | Completed | Metastatic Melanoma                     | Drug: Cisplatin Biological: ALT-801                                                                                                                                                                                                                                                                    | To evaluate the safety of the ALT-801-Cisplatin regimen. To assess the objective response (OR) which includes CR and PR. To assess the clinical benefit (CB) of the ALT-801-Cisplatin regimen which includes CR, PR and SD. To determine the MTD of the ALT-801-Cisplatin regimen. To assess the six-month and one-year survival rates. To evaluate the immunogenicity and pharmacokinetic profile of ALT-801. | Phase 1 Phase 2 | 25  | Feb-10     | 27-Oct-16      |
| IL-2 | NCT00931138 | Treatment of Acute Myeloid Leukemia (AML) in Adults 50 to 70 Years, Study of Two Anthracyclines and the Interest of Maintenance                                                   | Completed | Acute Myeloid Leukemia                  | Drug: chemotherapy (Aracytine + Daunorubicin)                                                                                                                                                                                                                                                          | To compare idarubicin versus daunorubicin: the duration of the event-free survival (EFS) to compare IL2 versus abstinence : the relapse rate assessed during the first year following the start of maintenance treatment with interleukin Frequency and severity of adverse events                                                                                                                             | Phase 3         | 420 | Dec-99     | 2-Jul-09       |
| IL-2 | NCT00002925 | Combination Chemotherapy Plus PSC 833 Followed by Interleukin-2 in Treating Patients With Acute Myelogenous Leukemia                                                              | Completed | Leukemia                                | Drug: ara-C Drug: Daunorubicin Drug: Etoposide Drug: PSC-833 Biological: Aldesleukin                                                                                                                                                                                                                   |                                                                                                                                                                                                                                                                                                                                                                                                                | Phase 1 Phase 2 | 410 | Feb-97     | 30-Nov-12      |
| IL-2 | NCT00085462 | Gene-Modified White Blood Cells Followed By Interleukin-2 and Vaccine Therapy in Treating Patients With Metastatic Melanoma                                                       | Completed | Melanoma (Skin)                         | Biological: aldesleukin Biological: filgrastim Biological: gp100-fowlpox vaccine Biological: therapeutic autologous lymphocytes Biological: therapeutic tumor infiltrating lymphocytes Drug: cyclophosphamide Drug: fludarabine                                                                        |                                                                                                                                                                                                                                                                                                                                                                                                                | Phase 1         | 61  | May-04     | 22-Jun-12      |
| IL-2 | NCT00019591 | Vaccine Therapy With or Without Interleukin-2 in Treating Patients With Locally Advanced or Metastatic Colorectal Cancer                                                          | Completed | Colorectal Cancer                       | Biological: aldesleukin Biological: ras peptide cancer vaccine Procedure: adjuvant therapy                                                                                                                                                                                                             | Response rate every 3 months for up to a year after completion of study treatment                                                                                                                                                                                                                                                                                                                              | Phase 1 Phase 2 |     | Mar-99     | 20-Jun-13      |
| IL-2 | NCT00022438 | Vaccine Therapy With or Without Interleukin-2 in Treating Patients With Metastatic Melanoma That Has Not Responded to Previous Treatment                                          | Completed | Melanoma (Skin)                         | Biological: aldesleukin Biological: incomplete Freund's adjuvant Biological: recombinant tyrosinase-related protein-2                                                                                                                                                                                  |                                                                                                                                                                                                                                                                                                                                                                                                                | Phase 2         |     | Jun-01     | 19-Jun-13      |
| IL-2 | NCT00008190 | Combination Chemotherapy Followed by Peripheral Stem Cell Transplantation and Interleukin-2 in Treating Patients With Acute                                                       | Completed | Leukemia                                | Biological: aldesleukin Biological: filgrastim Drug: busulfan Drug: cyclophosphamide Drug: etoposide Drug: melphalan Procedure: peripheral blood                                                                                                                                                       |                                                                                                                                                                                                                                                                                                                                                                                                                | Phase 2         |     | Mar-99     | 4-Feb-13       |
| IL-2 | NCT00014573 | Chemotherapy and Vaccine Therapy Followed by Bone Marrow or Peripheral Stem Cell Transplantation and Interleukin-2 in Treating Patients With Recurrent or Refractory Brain Cancer | Completed | Brain and Central Nervous System Tumors | Biological: aldesleukin Biological: autologous tumor cell vaccine Biological: filgrastim Biological: sargramostim Biological: therapeutic autologous lymphocytes Drug: carmustine Drug: cisplatin Drug: cyclophosphamide Drug: paclitaxel Procedure: autologous bone marrow transplantation Procedure: |                                                                                                                                                                                                                                                                                                                                                                                                                | Phase 2         |     | Aug-98     | April 8, 2013  |
| IL-2 | NCT00079144 | Lymphocyte-Depleting Nonmyeloablative Preparative Chemotherapy Followed By Autologous Lymphocyte Infusion, Peptide Vaccine Plus Montanide ISA-51, and Interleukin-2 in Treating   | Completed | Melanoma (Skin)                         | Biological: NY-ESO-1 peptide vaccine Biological: aldesleukin Biological: filgrastim Biological: incomplete Freund's adjuvant Biological: therapeutic autologous lymphocytes Drug: cyclophosphamide Drug: fludarabine                                                                                   | Clinical tumor regression Survival of infused lymphocytes Long-term immune status                                                                                                                                                                                                                                                                                                                              | Phase 2         |     | Jan-04     | 19-Jun-13      |

|      |             |                                                                                                                                      |           |                                                                                                                                            |                                                                                                                                                                               |                                                                                                                                                                                                                                                                                                                                                                                                                                                                                                                                                                                                                                                                                                                                                                                                                                                                                                                                                                                                                                                                                                                                                                                                                                                                                                                                                                                                                                                                                                                                                                                                      |                 |     |            |           |
|------|-------------|--------------------------------------------------------------------------------------------------------------------------------------|-----------|--------------------------------------------------------------------------------------------------------------------------------------------|-------------------------------------------------------------------------------------------------------------------------------------------------------------------------------|------------------------------------------------------------------------------------------------------------------------------------------------------------------------------------------------------------------------------------------------------------------------------------------------------------------------------------------------------------------------------------------------------------------------------------------------------------------------------------------------------------------------------------------------------------------------------------------------------------------------------------------------------------------------------------------------------------------------------------------------------------------------------------------------------------------------------------------------------------------------------------------------------------------------------------------------------------------------------------------------------------------------------------------------------------------------------------------------------------------------------------------------------------------------------------------------------------------------------------------------------------------------------------------------------------------------------------------------------------------------------------------------------------------------------------------------------------------------------------------------------------------------------------------------------------------------------------------------------|-----------------|-----|------------|-----------|
| IL-2 | NCT02869295 | A Phase 1/2 Multicenter Dose Escalation and Expansion Study Of NKTR-214 In Subjects With Locally Advanced Or Metastatic Solid Tumors | Completed | Unspecified Adult Solid Tumor, Protocol Specific                                                                                           | Drug: NKTR-214                                                                                                                                                                | Safety of NKTR-214 as evaluated by incidence of drug-related adverse events (AEs), serious adverse events (SAEs), adverse events leading to discontinuation, deaths and clinical laboratory test abnormalities Tolerability of NKTR-214 as evaluated by incidence of dose limiting toxicities (DLTs), drug-related adverse events (AEs), serious adverse events (SAEs), adverse events leading to discontinuation, deaths and clinical laboratory test abnormalities Objective response rate (ORR) of NKTR-214 based on investigator review of radiographic images Best overall response (BOR) in the population of interest Duration of Response (DOR) Progression-Free Survival (PFS) Clinical benefit rate (CBR) Median time to response (MTR) Overall Survival (OS) Maximum observed plasma concentration (Cmax) of NKTR-214 Time of maximum observed plasma concentration (Tmax) of NKTR-214 Area under the plasma concentration time curve in the dosing interval AUC(TAU) of NKTR-214 Half life (t½) of NKTR-214 Functional and phenotypic characterization of peripheral immune cells by flow cytometry Changes in soluble cytokines and chemokines by multiplex immunoassay Functional and phenotypic characterization of tumor immune infiltrates (TIL) by flow cytometry. Functional and phenotypic characterization of tumor immune infiltrate (TIL) by next generation sequencing of T cell receptors Functional and phenotypic characterization of tumor immune infiltrate (TIL) by immunohistochemistry (IHC) Immunogenicity analysis to assess antibodies to NKTR-214 in human serum | Phase 1 Phase 2 | 40  | Dec-15     | 1-Nov-18  |
| IL-2 | NCT00001249 | Treatment of Tac-Expressing Cutaneous T-Cell Lymphoma (CTCL) and Adult T-Cell Leukemia (ATL) With Yttrium-90 Radiolabeled Anti-      | Completed | Leukemia, T-Cell Lymphoma, T-Cell, Cutaneous                                                                                               | Drug: Yttrium-90 radiolabeled anti-Tac antibody                                                                                                                               |                                                                                                                                                                                                                                                                                                                                                                                                                                                                                                                                                                                                                                                                                                                                                                                                                                                                                                                                                                                                                                                                                                                                                                                                                                                                                                                                                                                                                                                                                                                                                                                                      | Phase 1         | 30  | Dec-89     | 4-Mar-08  |
| IL-2 | NCT01081223 | Phase I/II Study To Test The Safety and Efficacy of TVI-Brain-1 As A Treatment For Recurrent Grade IV                                | Completed | Glioma High Grade Astrocytoma Glioblastoma Multiforme                                                                                      | Biological: Cancer vaccine plus immune adjuvant, plus activated white blood cells                                                                                             | Relative toxicity Progression free survival Immunogenicity Overall survival                                                                                                                                                                                                                                                                                                                                                                                                                                                                                                                                                                                                                                                                                                                                                                                                                                                                                                                                                                                                                                                                                                                                                                                                                                                                                                                                                                                                                                                                                                                          | Phase 1 Phase 2 | 14  | April 2010 | 6-Jun-13  |
| IL-2 | NCT02845999 | Allogenic Immunotherapy Based on Natural Killer (NK) Cell Adoptive Transfer in Metastatic Gastrointestinal Carcinoma Treated         | Completed | Gastrointestinal Metastatic Cancer                                                                                                         | Biological: allogenic immunotherapy based on Natural Killer cells adoptive transfer Biological: cetuximab Drug: Cyclophosphamide Drug: fludarabine Drug:                      | number of patients with clinical or biological grade 3 or 4 treatment-related adverse events as assessed by CTCAE v4.0                                                                                                                                                                                                                                                                                                                                                                                                                                                                                                                                                                                                                                                                                                                                                                                                                                                                                                                                                                                                                                                                                                                                                                                                                                                                                                                                                                                                                                                                               | Phase 1         | 9   | Nov-09     | 27-Jul-16 |
| IL-2 | NCT00002733 | Biological Therapy in Treating Patients With Metastatic Cancer                                                                       | Completed | Kidney Cancer Melanoma (Skin) Unspecified Adult Solid Tumor, Protocol Specific                                                             | Biological: aldesleukin Biological: recombinant interferon alfa Biological: therapeutic tumor infiltrating                                                                    |                                                                                                                                                                                                                                                                                                                                                                                                                                                                                                                                                                                                                                                                                                                                                                                                                                                                                                                                                                                                                                                                                                                                                                                                                                                                                                                                                                                                                                                                                                                                                                                                      | Phase 2         | 30  | Jan-96     | 11-May-11 |
| IL-2 | NCT00331526 | Cellular Adoptive Immunotherapy in Treating Patients With Glioblastoma Multiforme                                                    | Completed | Brain and Central Nervous System Tumors                                                                                                    | Biological: aldesleukin Biological: therapeutic autologous lymphocytes Procedure: adjuvant                                                                                    | Side effects and toxicity Progression-free survival and overall survival                                                                                                                                                                                                                                                                                                                                                                                                                                                                                                                                                                                                                                                                                                                                                                                                                                                                                                                                                                                                                                                                                                                                                                                                                                                                                                                                                                                                                                                                                                                             | Phase 2         | 83  | Feb-99     | 25-Mar-13 |
| IL-2 | NCT00697671 | Pilot Study of Haploidentical Natural Killer Cell Infusions for Poor Prognosis Non-AML Hematologic Malignancies                      | Completed | Acute Lymphoblastic Leukemia Chronic Myelogenous Leukemia Juvenile Myelomonocytic Leukemia Myelodysplastic Syndrome Non-Hodgkin's Lymphoma | Other: NK Cell Infusion Biological: Immunotherapy Device: Miltenyi Biotec CiniMACS device Drug: Interleukin-2 (IL-2) Drug: Clofarabine Drug: Cyclophosphamide Drug: Etoposide | To assess the safety of chemotherapy and IL-2 administration to facilitate transient NK-cell engraftment in research participants with chemotherapy refractory non-acute myelogenous leukemia (non-AML) hematologic malignancies To study the persistence, phenotype and function of donor natural killer (NK) cells after infusion in research participants with chemotherapy refractory hematologic malignancies. To explore the efficacy of NK cell infusion in research participants with chemotherapy refractory hematologic malignancies                                                                                                                                                                                                                                                                                                                                                                                                                                                                                                                                                                                                                                                                                                                                                                                                                                                                                                                                                                                                                                                       | Phase 1         | 48  | Mar-07     | 16-Jul-13 |
| IL-2 | NCT01144247 | Cellular Immunotherapy Study for Brain Cancer                                                                                        | Completed | Gliomas Anaplastic Astrocytoma Anaplastic Oligodendroglioma Anaplastic Mixed Glioma Glioblastoma Multiforme Malignant Meningioma           | Drug: alloreactive CTL                                                                                                                                                        | Number of patients with adverse events as a measure of safety and tolerability Maximum tolerated dose                                                                                                                                                                                                                                                                                                                                                                                                                                                                                                                                                                                                                                                                                                                                                                                                                                                                                                                                                                                                                                                                                                                                                                                                                                                                                                                                                                                                                                                                                                | Phase 1         | 10  | Jul-10     | 27-May-16 |
| IL-2 | NCT00416429 | Medroxyprogesterone or Interferon and/or Aldesleukin in Treating Patients With Metastatic Kidney                                     | Completed | Kidney Cancer                                                                                                                              | Biological: aldesleukin Biological: recombinant interferon alpha-2a Drug: medroxyprogesterone                                                                                 | Overall survival Objective response rate (complete and partial) Progression-free survival Toxicity Quality of life in week 10                                                                                                                                                                                                                                                                                                                                                                                                                                                                                                                                                                                                                                                                                                                                                                                                                                                                                                                                                                                                                                                                                                                                                                                                                                                                                                                                                                                                                                                                        | Phase 3         | 456 |            | 26-Sep-12 |
| IL-2 | NCT00002637 | Biological Therapy in Treating Patients With Prostate Cancer                                                                         | Completed | Prostate Cancer                                                                                                                            | Biological: aldesleukin Biological: gene-modified tumor cell vaccine therapy Biological: recombinant interferon                                                               |                                                                                                                                                                                                                                                                                                                                                                                                                                                                                                                                                                                                                                                                                                                                                                                                                                                                                                                                                                                                                                                                                                                                                                                                                                                                                                                                                                                                                                                                                                                                                                                                      | Phase 1 Phase 2 | 25  | Jan-95     | 25-Jun-13 |

|      |             |                                                                                                                                                                                                 |           |                                                                                                                                                                                                                                                                                                                                                                                                                                                                                                                                                                                                                                                                                                                                                                                                                                                                                                                                                                                                             |                                                                                                                                                                                                                                                                                                                                                                                                  |                                                                                                                                                                                                                                                                                                                                                                                                                                                                                                                                                                                                |                 |    |            |           |
|------|-------------|-------------------------------------------------------------------------------------------------------------------------------------------------------------------------------------------------|-----------|-------------------------------------------------------------------------------------------------------------------------------------------------------------------------------------------------------------------------------------------------------------------------------------------------------------------------------------------------------------------------------------------------------------------------------------------------------------------------------------------------------------------------------------------------------------------------------------------------------------------------------------------------------------------------------------------------------------------------------------------------------------------------------------------------------------------------------------------------------------------------------------------------------------------------------------------------------------------------------------------------------------|--------------------------------------------------------------------------------------------------------------------------------------------------------------------------------------------------------------------------------------------------------------------------------------------------------------------------------------------------------------------------------------------------|------------------------------------------------------------------------------------------------------------------------------------------------------------------------------------------------------------------------------------------------------------------------------------------------------------------------------------------------------------------------------------------------------------------------------------------------------------------------------------------------------------------------------------------------------------------------------------------------|-----------------|----|------------|-----------|
| IL-2 | NCT00052520 | Biological Therapy in Treating Patients With Advanced Myelodysplastic Syndrome, Acute or Chronic Myeloid Leukemia, or Acute Lymphoblastic Leukemia Who Are Undergoing Stem Cell Transplantation | Completed | Adult Acute Myeloid Leukemia With 11q23 (MLL) Abnormalities Adult Acute Myeloid Leukemia With Inv(16)(p13;q22) Adult Acute Myeloid Leukemia With t(15;17)(q22;q12) Adult Acute Myeloid Leukemia With t(16;16)(p13;q22) Adult Acute Myeloid Leukemia With t(8;21)(q22;q22) B-cell Adult Acute Lymphoblastic Leukemia B-cell Childhood Acute Lymphoblastic Leukemia Childhood Chronic Myelogenous Leukemia Childhood Myelodysplastic Syndromes Chronic Myelomonocytic Leukemia Essential Thrombocythemia Polycythemia Vera Previously Treated Myelodysplastic Syndromes Recurrent Adult Acute Lymphoblastic Leukemia Recurrent Adult Acute Myeloid Leukemia Recurrent Childhood Acute Myeloid Leukemia Recurrent Childhood Acute Myeloid Leukemia Refractory Anemia With Excess Blasts Refractory Anemia With Excess Blasts in Transformation Relapsing Chronic Myelogenous Leukemia Secondary Acute Myeloid Leukemia T-cell Adult Acute Lymphoblastic Leukemia T-cell Childhood Acute Lymphoblastic Leukemia | Biological: therapeutic allogeneic lymphocytes Biological: aldesleukin Procedure: peripheral blood stem cell transplantation Procedure: allogeneic bone marrow transplantation Other: laboratory biomarker analysis Genetic: gene expression analysis Other: immunologic technique Other: flow cytometry Genetic: polymerase chain reaction Genetic: cytogenetic analysis Other: staining method | Toxicity rate associated with infusing donor CD8+ CTL clones specific for WT1 in patients at high risk for post transplant relapse of CML, AML, or ALL Relapse of disease                                                                                                                                                                                                                                                                                                                                                                                                                      | Phase 1 Phase 2 | 37 | Sep-02     | 29-Mar-17 |
| IL-2 | NCT0003575  | Interleukin-12 Following Chemotherapy in Treating Patients With Refractory HIV-Associated Non-Haploidentical NK Cell Infusion in Malignant Melanoma                                             | Completed | Lymphoma                                                                                                                                                                                                                                                                                                                                                                                                                                                                                                                                                                                                                                                                                                                                                                                                                                                                                                                                                                                                    | Biological: filgrastim Biological: recombinant interleukin-12 Drug: etoposide Drug: ifosfamide                                                                                                                                                                                                                                                                                                   |                                                                                                                                                                                                                                                                                                                                                                                                                                                                                                                                                                                                | Phase 2         | 40 | Jan-99     | 8-Feb-13  |
| IL-2 | NCT00846833 | Haploidentical NK Cell Infusion in Malignant Melanoma                                                                                                                                           | Completed | Melanoma                                                                                                                                                                                                                                                                                                                                                                                                                                                                                                                                                                                                                                                                                                                                                                                                                                                                                                                                                                                                    | Biological: Haploidentical NK cell                                                                                                                                                                                                                                                                                                                                                               | To determine the maximum-tolerated dose of haploidentical NK cells To assess NK cell infusion-related toxicity To evaluate response rate To determine immune reconstitution                                                                                                                                                                                                                                                                                                                                                                                                                    | Phase 1 Phase 2 | 12 | Feb-09     | 8-Jun-12  |
| IL-2 | NCT02416466 | CAR-T Hepatic Artery Infusions and Sir-Spheres for Liver Metastases                                                                                                                             | Completed | Liver Metastases                                                                                                                                                                                                                                                                                                                                                                                                                                                                                                                                                                                                                                                                                                                                                                                                                                                                                                                                                                                            | Biological: anti-CEA CAR-T cells Device: Sir-Spheres                                                                                                                                                                                                                                                                                                                                             | Safety of CAR-T cell hepatic artery infusions in combination with Sir-Spheres as Measured by Number of Participants with Adverse Events Treatment response (Liver tumor response by MRI, PET, CEA level, and biopsy) Serum cytokine levels CAR-T detection in liver tumors, normal liver, and extrahepatic sites                                                                                                                                                                                                                                                                               | Phase 1         | 8  | April 2015 | 26-Mar-19 |
| IL-2 | NCT00002787 | Vaccine Therapy in Treating Patients With Multiple Myeloma Who Have Undergone Stem Cell Transplantation                                                                                         | Completed | Refractory Multiple Myeloma Stage I Multiple Myeloma Stage II Multiple Myeloma Stage III Multiple Myeloma                                                                                                                                                                                                                                                                                                                                                                                                                                                                                                                                                                                                                                                                                                                                                                                                                                                                                                   | Biological: autologous immunoglobulin idiotype-KLH conjugate vaccine Biological: sargramostim Biological: aldesleukin Other: laboratory biomarker analysis                                                                                                                                                                                                                                       | Toxicities graded using the National Cancer Institute (NCI) Common Toxicity Criteria Immune response                                                                                                                                                                                                                                                                                                                                                                                                                                                                                           | Phase 1         | 22 | Mar-96     | 6-May-19  |
| IL-2 | NCT00048386 | Neuroblastoma Vaccine for Treatment of High-Risk Neuroblastoma After Chemotherapy                                                                                                               | Completed | Neuroblastoma                                                                                                                                                                                                                                                                                                                                                                                                                                                                                                                                                                                                                                                                                                                                                                                                                                                                                                                                                                                               | Biological: autologous neuroblastoma vaccine                                                                                                                                                                                                                                                                                                                                                     | Patients who demonstrate immunological anti-tumor response at any time during, and for up to 12 months from initiation of, treatment with injections of autologous neuroblastoma cells, genetically modified by adenoviral vectors to secrete IL-2 To determine the toxicity of the autologous neuroblastoma vaccine given according to this schedule To obtain preliminary data on progression-free survival from high-risk neuroblastoma following                                                                                                                                           | Phase 1         | 13 | Nov-99     | 27-Jul-12 |
| IL-2 | NCT00621452 | Genetically Engineered Lymphocytes, Cyclophosphamide, and Aldesleukin in Treating Patients With Relapsed or Refractory Mantle Cell Lymphoma or Indolent B-Cell Non-Hodgkin Lymphoma             | Completed | B-cell Chronic Lymphocytic Leukemia Extranodal Marginal Zone B-cell Lymphoma of Mucosa-associated Lymphoid Tissue Nodal Marginal Zone B-cell Lymphoma Recurrent Grade 1 Follicular Lymphoma Recurrent Grade 2 Follicular Lymphoma Recurrent Mantle Cell Lymphoma Recurrent Marginal Zone Lymphoma Recurrent Small Lymphocytic Lymphoma Refractory Chronic Lymphocytic Leukemia Splenic Marginal Zone Lymphoma Waldenström Macroglobulinemia                                                                                                                                                                                                                                                                                                                                                                                                                                                                                                                                                                 | Biological: therapeutic autologous lymphocytes Drug: cyclophosphamide Biological: aldesleukin Genetic: polymerase chain reaction Genetic: gene rearrangement analysis Procedure: lymph node biopsy Biological: genetically engineered lymphocyte therapy Procedure: bone marrow aspiration Other: flow cytometry Other: laboratory biomarker                                                     | Feasibility of transfecting and expanding the necessary numbers of T cells and the types of problems and toxicities which might be encountered, graded according to the National Cancer Institute Common Terminology Criteria for Adverse Events version 3.0 Comparison of the percentages of CD20-specific T cells and malignant B cells present in the blood before and after each T cell infusion Immune response as assessed by ELISA and percent chromium release in cytotoxicity assays Absolute numbers of T cells expressing the chimeric T Cell receptor (cTCR) per cubic uL of blood | Phase 1         | 12 | Aug-07     | 6-Aug-14  |
| IL-2 | NCT01127451 | Study of Denileukin Diftitox in Patients With Stage IIIC and Stage IV                                                                                                                           | Completed | Stage IIIC Melanoma Stage IV Melanoma                                                                                                                                                                                                                                                                                                                                                                                                                                                                                                                                                                                                                                                                                                                                                                                                                                                                                                                                                                       | Drug: Denileukin diftitox                                                                                                                                                                                                                                                                                                                                                                        | Safety Parameter Efficacy Parameter                                                                                                                                                                                                                                                                                                                                                                                                                                                                                                                                                            | Phase 2         | 98 | 22-Jun-10  | 5-Mar-19  |
| IL-2 | NCT00493129 | Ontak (Denileukin Diftitox) in Patients With Systemic Mastocytosis (SM)                                                                                                                         | Completed | Leukemia Systemic Mastocytosis                                                                                                                                                                                                                                                                                                                                                                                                                                                                                                                                                                                                                                                                                                                                                                                                                                                                                                                                                                              | Drug: Ontak (Denileukin Diftitox)                                                                                                                                                                                                                                                                                                                                                                | Objective Response Rate                                                                                                                                                                                                                                                                                                                                                                                                                                                                                                                                                                        | Phase 2         | 8  | Jul-04     | 8-Feb-12  |
| IL-2 | NCT00138164 | Denileukin Diftitox in Treating Patients With Relapsed or Refractory Non-Hodgkin's Lymphoma                                                                                                     | Completed | Lymphoma                                                                                                                                                                                                                                                                                                                                                                                                                                                                                                                                                                                                                                                                                                                                                                                                                                                                                                                                                                                                    | Biological: denileukin diftitox                                                                                                                                                                                                                                                                                                                                                                  | Objective clinical response (complete or partial response) Time to progression Overall survival at 1 year Safety                                                                                                                                                                                                                                                                                                                                                                                                                                                                               | Phase 2         | 50 | Dec-04     | 30-May-13 |
| IL-2 | NCT00132522 | EMD 273066 in Patients With Recurrent EpCAM Positive Ovarian, Prostate, Colorectal or Non-small Cell Lung Cancers When First Given                                                              | Completed | Ovarian Cancer Colorectal Cancer Carcinoma, Non-small-cell Lung Prostate Cancer                                                                                                                                                                                                                                                                                                                                                                                                                                                                                                                                                                                                                                                                                                                                                                                                                                                                                                                             | Drug: EMD 273066                                                                                                                                                                                                                                                                                                                                                                                 | efficacy safety                                                                                                                                                                                                                                                                                                                                                                                                                                                                                                                                                                                | Phase 1         | 45 | May-05     | 25-Oct-13 |
| IL-2 | NCT00082914 | Denileukin Diftitox in Treating Patients With Metastatic Melanoma or Metastatic Kidney Cancer                                                                                                   | Completed | Kidney Cancer Melanoma (Skin)                                                                                                                                                                                                                                                                                                                                                                                                                                                                                                                                                                                                                                                                                                                                                                                                                                                                                                                                                                               | Biological: denileukin diftitox                                                                                                                                                                                                                                                                                                                                                                  | Clinical response Changes in levels of CD4-positive CD25-positive lymphocytes in the peripheral blood Toxicity                                                                                                                                                                                                                                                                                                                                                                                                                                                                                 | Phase 2         |    | Mar-04     | 20-Jun-13 |

|      |             |                                                                                                                                                           |           |                                                                                                                                                                                                                                                                                                                                                                                                                                                                                                                                                                                                                                                                                                                    |                                                                                                                                                                                                                                                                                                                                                                                                                         |                                                                                                                                                                                                                                                                                                                                                                                                                                                                                                               |                 |     |            |           |
|------|-------------|-----------------------------------------------------------------------------------------------------------------------------------------------------------|-----------|--------------------------------------------------------------------------------------------------------------------------------------------------------------------------------------------------------------------------------------------------------------------------------------------------------------------------------------------------------------------------------------------------------------------------------------------------------------------------------------------------------------------------------------------------------------------------------------------------------------------------------------------------------------------------------------------------------------------|-------------------------------------------------------------------------------------------------------------------------------------------------------------------------------------------------------------------------------------------------------------------------------------------------------------------------------------------------------------------------------------------------------------------------|---------------------------------------------------------------------------------------------------------------------------------------------------------------------------------------------------------------------------------------------------------------------------------------------------------------------------------------------------------------------------------------------------------------------------------------------------------------------------------------------------------------|-----------------|-----|------------|-----------|
| IL-2 | NCT00438984 | Therapeutic Autologous Lymphocytes, Cyclophosphamide, and Aldesleukin in Treating Patients With Stage IV Melanoma                                         | Completed | Recurrent Melanoma Stage IV Melanoma                                                                                                                                                                                                                                                                                                                                                                                                                                                                                                                                                                                                                                                                               | Drug: cyclophosphamide Biological: therapeutic autologous lymphocytes Biological: aldesleukin Other: immunohistochemistry staining method Procedure: biopsy Other: laboratory biomarker analysis Other: immunologic                                                                                                                                                                                                     | The identification of a CY/IL-2 regimen that is considered to be safe The identification of a CY/IL-2 regimen (among those considered safe) which yields the greatest effect on the duration of in vivo persistence of adoptively transferred CTL clones                                                                                                                                                                                                                                                      | Phase 1         | 11  | Dec-06     | 16-Mar-12 |
| IL-2 | NCT00553306 | Laboratory-Treated T Cells and Aldesleukin After Cyclophosphamide in Treating Patients With Stage IV Melanoma                                             | Completed | Recurrent Melanoma Stage IV Melanoma                                                                                                                                                                                                                                                                                                                                                                                                                                                                                                                                                                                                                                                                               | Biological: therapeutic autologous lymphocytes Biological: aldesleukin Drug: cyclophosphamide Procedure: biopsy Other: immunohistochemistry staining method Other: flow cytometry Genetic: polymerase chain reaction                                                                                                                                                                                                    | Safety and toxicity as assessed by NCI CTC version 3.0 Antitumor effects of CD4+ and CD8+ antigen-specific T-cells Duration of in vivo persistence of adoptively transferred CD8+ antigen-specific T cell clones in the presence or absence of transferred CD4+ T cells In vivo antitumor efficacy of the infused autologous antigen-specific CD4+ T cells                                                                                                                                                    | Phase 1 Phase 2 | 10  | Sep-07     | 15-Feb-17 |
| IL-2 | NCT00002798 | Combination Chemotherapy With or Without Bone Marrow Transplantation in Treating Children With Acute Myelogenous Leukemia or Myelodysplastic Syndrome     | Completed | Childhood Acute Erythroleukemia (M6) Childhood Acute Megakaryocytic Leukemia (M7) Childhood Acute Monoblastic Leukemia (M5a) Childhood Acute Monocytic Leukemia (M5b) Childhood Acute Myeloblastic Leukemia With Maturation (M2) Childhood Acute Myeloblastic Leukemia Without Maturation (M1) Childhood Acute Myelomonocytic Leukemia (M4) Childhood Myelodysplastic Syndromes Chronic Myelomonocytic Leukemia de Novo Myelodysplastic Syndromes Refractory Anemia Refractory Anemia With Excess Blasts Refractory Anemia With Excess Blasts in Transformation Refractory Anemia With Ringed Sideroblasts Secondary Myelodysplastic                                                                               | Drug: asparaginase Drug: daunorubicin hydrochloride Drug: fludarabine phosphate Drug: therapeutic hydrocortisone Procedure: allogeneic bone marrow transplantation Radiation: 3-dimensional conformal radiation therapy Biological: filgrastim Drug: cytarabine Drug: idarubicin Drug: dexamethasone Drug: thioguanine Drug: etoposide Drug: methotrexate Drug: cyclophosphamide Biological: aldesleukin Drug: busulfan | Proportions of patients achieving remission rate during induction therapy Proportion of patients dying or with residual disease during induction therapy Time to marrow recovery (induction phase) Frequency of toxicities, including infectious complications (induction phase) Marrow status Percent of blasts Complete remission at the end of consolidation therapy Survival following consolidation Event-free survival following consolidation Overall survival (intensification) EFS (intensification) | Phase 3         | 880 | Aug-96     | 16-Jan-13 |
| IL-2 | NCT00082940 | Denileukin Diftitox in Treating Patients With Fludarabine-Refractory B-Cell Chronic Lymphocytic                                                           | Completed | Leukemia                                                                                                                                                                                                                                                                                                                                                                                                                                                                                                                                                                                                                                                                                                           | Biological: denileukin diftitox                                                                                                                                                                                                                                                                                                                                                                                         |                                                                                                                                                                                                                                                                                                                                                                                                                                                                                                               | Phase 2         |     | Aug-02     | 19-Jan-17 |
| IL-2 | NCT00197860 | Dendritic Cell Based Therapy of Renal Cell Carcinoma                                                                                                      | Completed | Advanced Renal Cell Carcinoma                                                                                                                                                                                                                                                                                                                                                                                                                                                                                                                                                                                                                                                                                      | Biological: tumor antigen loaded autologous dendritic cells                                                                                                                                                                                                                                                                                                                                                             | Primary aim of the study is to evaluate tolerability and safety of the treatment. Secondary aims: evaluation of treatment induced immune response and clinical response.                                                                                                                                                                                                                                                                                                                                      | Phase 1 Phase 2 | 40  | Sep-04     | 23-Nov-11 |
| IL-2 | NCT00793845 | Tandem High-dose Chemotherapy and Autologous Stem Cell Rescue in Patients With High-risk                                                                  | Completed | Neuroblastoma                                                                                                                                                                                                                                                                                                                                                                                                                                                                                                                                                                                                                                                                                                      | Drug: Cyclophosphamide Drug: Etoposide Drug: Carboplatin Drug: Thiotepa Drug: Melphalan Radiation: Total                                                                                                                                                                                                                                                                                                                | Overall survival and event-free survival, short-term and long-term toxicity of tandem high-dose chemotherapy and autologous stem cell transplantation                                                                                                                                                                                                                                                                                                                                                         | Phase 2         | 40  | Aug-08     | 18-Sep-18 |
| IL-2 | NCT00003190 | Combination Chemotherapy With or Without Valspodar in Treating Patients With Previously Untreated Acute Myeloid Leukemia                                  | Completed | Adult Acute Megakaryoblastic Leukemia (M7) Adult Acute Minimally Differentiated Myeloid Leukemia (M0) Adult Acute Monoblastic Leukemia (M5a) Adult Acute Monocytic Leukemia (M5b) Adult Acute Myeloblastic Leukemia With Maturation (M2) Adult Acute Myeloblastic Leukemia Without Maturation (M1) Adult Acute Myeloid Leukemia With 11q23 (MLL) Abnormalities Adult Acute Myeloid Leukemia With Del(5q) Adult Acute Myeloid Leukemia With Inv(16)(p13;q22) Adult Acute Myeloid Leukemia With t(16;16)(p13;q22) Adult Acute Myeloid Leukemia With t(8;21)(q22;q22) Adult Acute Myelomonocytic Leukemia (M4) Adult Erythroleukemia (M6a) Adult Pure Erythroid Leukemia (M6b) Untreated Adult Acute Myeloid Leukemia | Drug: cytarabine Drug: daunorubicin hydrochloride Drug: etoposide Drug: valspodar                                                                                                                                                                                                                                                                                                                                       | Disease-free survival Overall survival                                                                                                                                                                                                                                                                                                                                                                                                                                                                        | Phase 3         | 640 | Jan-98     | 4-Jun-13  |
| IL-2 | NCT01853358 | Phase I of Infusion of Selected Donor NK Cells After Allogeneic Stem Cell Transplantation                                                                 | Completed | Hematological Malignancy                                                                                                                                                                                                                                                                                                                                                                                                                                                                                                                                                                                                                                                                                           | Biological: NK Cell infusion                                                                                                                                                                                                                                                                                                                                                                                            | Occurrence of grade 3-4 toxicity within 30 days of NK cells infusion Number of infused cells population : CD3+, CD56+/CD16+, CD56-/CD16+, CD56+/CD16-(Determination) relapse number of NK cells function form baseline to Month 12 (kinetics)                                                                                                                                                                                                                                                                 | Phase 1         | 17  | April 2013 | 12-Jul-18 |
| IL-2 | NCT00001685 | Immunization of HLA-A201 Patients With Metastatic Melanoma Using a Combination of Immunodominant Peptides From Three Melanoma Antigens, MART-1, GP100 and | Completed | Melanoma Neoplasm Metastasis                                                                                                                                                                                                                                                                                                                                                                                                                                                                                                                                                                                                                                                                                       | Biological: Immunodominant peptides from three melanoma antigens, MART-1, GP100 and tyrosinase                                                                                                                                                                                                                                                                                                                          |                                                                                                                                                                                                                                                                                                                                                                                                                                                                                                               | Phase 2         | 114 | Nov-97     | 4-Mar-08  |
| IL-2 | NCT00128622 | Denileukin Diftitox Followed by Vaccine Therapy in Treating Patients With Metastatic Cancer                                                               | Completed | Breast Cancer Colorectal Cancer Lung Cancer Pancreatic Cancer Unspecified Adult Solid Tumor, Protocol Specific                                                                                                                                                                                                                                                                                                                                                                                                                                                                                                                                                                                                     | Biological: denileukin diftitox Biological: recombinant fowlpox-CEA(6D)/TRICOM vaccine Biological: therapeutic autologous dendritic cells                                                                                                                                                                                                                                                                               | Safety as measured by rate of adverse events during study drug treatment Rate of immune response as measured by ELISpot at week 10                                                                                                                                                                                                                                                                                                                                                                            | Phase 1         | 24  | Sep-05     | 12-Nov-12 |



|       |             |                                                                                                                                                                                                                                           |           |                                                                                                                                                                                                                                                                                                                                                   |                                                                                                                                                                                                                                                                                                                                 |                                                                                                                                                                                                                                                                                                                                                                                                                                                                          |                 |         |            |            |           |
|-------|-------------|-------------------------------------------------------------------------------------------------------------------------------------------------------------------------------------------------------------------------------------------|-----------|---------------------------------------------------------------------------------------------------------------------------------------------------------------------------------------------------------------------------------------------------------------------------------------------------------------------------------------------------|---------------------------------------------------------------------------------------------------------------------------------------------------------------------------------------------------------------------------------------------------------------------------------------------------------------------------------|--------------------------------------------------------------------------------------------------------------------------------------------------------------------------------------------------------------------------------------------------------------------------------------------------------------------------------------------------------------------------------------------------------------------------------------------------------------------------|-----------------|---------|------------|------------|-----------|
| IL-2  | NCT00871481 | Laboratory-Treated T Cells and Ipilimumab in Treating Patients With Metastatic Melanoma                                                                                                                                                   | Completed | Recurrent Melanoma Stage IV Melanoma                                                                                                                                                                                                                                                                                                              | Biological: ipilimumab Drug: cyclophosphamide Procedure: biopsy Biological: aldesleukin Other: immunohistochemistry staining method Genetic: polymerase chain reaction Other: immunoenzyme technique Biological: therapeutic cytotoxic T                                                                                        | Numeric frequency and functional persistence of transferred CTL Toxicity assessment of study treatment, assessed by National Cancer Institute (NCI) Common Terminology Criteria for Adverse Events (CTCAE) v3.0 Responses to non-targeted T cell antigens                                                                                                                                                                                                                | Phase 1 Phase 2 | 10      | Feb-09     | April 2017 | 19,       |
| IL-2  | NCT00001567 | A Phase II Efficacy Study of Roferon-A in Hairy Cell Leukemia                                                                                                                                                                             | Completed | Hairy Cell Leukemia                                                                                                                                                                                                                                                                                                                               | Drug: Roferon-A                                                                                                                                                                                                                                                                                                                 |                                                                                                                                                                                                                                                                                                                                                                                                                                                                          |                 | Phase 2 | 56         | Jan-97     | 4-Mar-08  |
| IL-2  | NCT01576692 | Combination Chemotherapy, Monoclonal Antibody, and Natural Killer Cells in Treating Young Patients With Recurrent or                                                                                                                      | Completed | Neuroblastoma                                                                                                                                                                                                                                                                                                                                     | Biological: Humanized anti-GD2 antibody Drug: Chemotherapy Other: Cytokines Biological: Natural killer cells Device: ClinMACS                                                                                                                                                                                                   | Number of patients experiencing unacceptable toxicity associated with humanized anti-GD2 antibody/chemotherapy (course 1) and anti-GD2 antibody/chemotherapy/NK cells (course 2) Response to treatment Time to progression Event free survival Overall survival                                                                                                                                                                                                          | Phase 1         | 34      | April 2012 | 15-Nov-18  |           |
| IL-2  | NCT02775292 | Gene-Modified T Cells, Vaccine Therapy, and Nivolumab in Treating Patients With Stage IV or Locally Advanced Solid Tumors Expressing NY-ESO-1                                                                                             | Completed | Adult Solid Neoplasm Childhood Solid Neoplasm Metastatic Neoplasm                                                                                                                                                                                                                                                                                 | Biological: Aldesleukin Drug: Cyclophosphamide Drug: Fludarabine Phosphate Other: Laboratory Biomarker Analysis Biological: Nivolumab Biological: NY-ESO-1 Reactive TCR Retroviral Vector Transduced Autologous PBL Biological: NY-ESO-1(157-165) Peptide-pulsed Autologous Dendritic Cell Vaccine Procedure: Positron Emission | Incidence of adverse events, defined following the National Cancer Institute Common Terminology Criteria for Adverse Events version 4.0 Maximum tolerated dose based on dose-limiting toxicity using the Common Toxicity Criteria Feasibility of generating NY-ESO-1 TCR cells and/or NY-ESO 1(157-165) peptide pulsed DC vaccine, determined by the incidence of preparation not meeting the lot release criteria Transgenic cell persistence                           | Phase 1         | 1       | 3-Jan-17   | 12-Aug-19  |           |
| IL-2  | NCT00006345 | Dexamethasone Followed by Denileukin Diftitox in Treating Patients With Persistent or Recurrent                                                                                                                                           | Completed | Drug/Agent Toxicity by Tissue/Organ Lymphoma                                                                                                                                                                                                                                                                                                      | Biological: denileukin diftitox Drug: dexamethasone                                                                                                                                                                                                                                                                             |                                                                                                                                                                                                                                                                                                                                                                                                                                                                          |                 | Phase 2 |            | Nov-99     | 30-May-13 |
| IL-2  | NCT01743157 | Biochemotherapy and Bevacizumab Followed by Consolidation Therapy With Ipilimumab for Metastatic                                                                                                                                          | Completed | Metastatic Melanoma                                                                                                                                                                                                                                                                                                                               | Drug: Biochemo + bevacizumab then ipilimumab                                                                                                                                                                                                                                                                                    | A phase I-II study of treatment of metastatic melanoma using induction therapy with Biochemotherapy and Bevacizumab followed by consolidation therapy with Ipilimumab (BB)                                                                                                                                                                                                                                                                                               | Phase 1 Phase 2 | 24      | Dec-10     | 29-Aug-13  |           |
| IL-2  | NCT03224871 | UCDCC#269: A Pilot Study of Intrlesional IL-2 and RT in Patients                                                                                                                                                                          | Completed | METASTATIC NON-SMALL CELL LUNG CANCER                                                                                                                                                                                                                                                                                                             | Drug: Intralesional IL-2 Drug: Nivolumab Drug:                                                                                                                                                                                                                                                                                  | Dose limiting toxicity (DLT) Disease free survival                                                                                                                                                                                                                                                                                                                                                                                                                       | Early Phase 1   | 3       | 11-Aug-17  | 7-Apr-20   |           |
| IL-2  | NCT00968760 | CD19-specific T Cell Infusion in Patients With B-Lineage Lymphoid Malignancies                                                                                                                                                            | Completed | Lymphoma B-cell Lymphoma                                                                                                                                                                                                                                                                                                                          | Procedure: Leukapheresis Procedure: Stem Cell Transplant Procedure: CD19-specific T Cell Infusion Drug: IL-2 Drug: Carmustine Drug: Etoposide Drug:                                                                                                                                                                             | Maximum Tolerated Dose (MTD) of T-cells in IL-2                                                                                                                                                                                                                                                                                                                                                                                                                          | Phase 1         | 34      | 20-Jun-11  | 30-Jun-20  |           |
| IL-2  | NCT03158935 | The ACTIVATE (Adoptive Cell Therapy InVigorated to Augment Tumor Eradication) Trial                                                                                                                                                       | Completed | Advanced Ovarian Cancer Malignant Melanoma                                                                                                                                                                                                                                                                                                        | Drug: Cyclophosphamide Drug: Fludarabine Procedure: Pembrolizumab Biological: Tumor-Infiltrating Lymphocytes (TILs) Biological: Interleukin-2 (IL-2)                                                                                                                                                                            | Monitoring of serious adverse events to determine the safety of initiating pembrolizumab following lymphodepleting chemotherapy, TIL administration, and low dose IL-2 injections within 35 days of TIL infusion Overall Response Rate Overall and Progression Free Survival Safety profile of pembrolizumab therapy given after or in combination with ACT in patients with advanced melanoma and ovarian cancer using CTCAE v4.0                                       | Phase 1         | 8       | 7-Jul-17   | 14-Aug-20  |           |
| IL-2  | NCT00910650 | Study of Gene Modified Immune Cells in Patients With Advanced Melanoma                                                                                                                                                                    | Completed | Metastatic Melanoma                                                                                                                                                                                                                                                                                                                               | Biological: F5 TCR transgenic cells and MART-1 peptide pulsed dendritic cells Drug: non-mvleobablative conditioning                                                                                                                                                                                                             | Response rate: The two-stage phase II study design includes response rate by RECIST criteria as the primary endpoint Other key measures that will be used to evaluate the intervention(s) or for observational studies, that are a focus of the study.                                                                                                                                                                                                                   | Phase 2         | 14      | 13-Oct-09  | 28-Feb-20  |           |
| IL-2  | NCT02203604 | High-Dose Aldesleukin and Ipilimumab in Treating Patients With Stage III-IV Melanoma That Cannot Be Removed By Surgery                                                                                                                    | Completed | Recurrent Melanoma Stage IIIA Melanoma Stage IIIB Melanoma Stage IIIC Melanoma Stage IV Melanoma                                                                                                                                                                                                                                                  | Biological: aldesleukin Biological: ipilimumab Other: laboratory biomarker analysis                                                                                                                                                                                                                                             | Objective response rate as determined by mWHO criteria Incidence of adverse events, graded according to the National Cancer Institute Common Terminology Criteria for Adverse Events version 4.0 Overall survival PFS based on the mWHO criteria BOR, defined as the best response across all time points Frequency of effector CD8+ T                                                                                                                                   | Phase 2         | 9       | 26-Nov-14  | 19-Jun-20  |           |
| IL-2  | NCT02955550 | A Safety Study of Human Cord Blood Derived, Culture-expanded, Natural Killer Cell (PNK-007) Infusion With or Without Subcutaneous Recombinant Human Interleukin-2 (rhIL-2) Following Autologous Stem Cell Transplant for Multiple Myeloma | Completed | Multiple Myeloma                                                                                                                                                                                                                                                                                                                                  | Drug: rhIL-2 Biological: PNK-007                                                                                                                                                                                                                                                                                                | Dose-Limiting Toxicity (DLT) Maximum Tolerated Dose (MTD) Dose Timing After Autologous Stem Cell Transplant Adverse Events (AEs) Response Rate                                                                                                                                                                                                                                                                                                                           | Phase 1         | 15      | 5-Jan-17   | 22-Jul-20  |           |
| IL-2  | NCT02316964 | Decitabine, Donor Natural Killer Cells, and Aldesleukin in Treating Patients With Relapsed or Refractory Acute Myeloid Leukemia                                                                                                           | Completed | Adult Acute Myeloid Leukemia With 11q23 (MLL) Abnormalities Adult Acute Myeloid Leukemia With Del(5q) Adult Acute Myeloid Leukemia With Inv(16)(p13;q22) Adult Acute Myeloid Leukemia With t(15;17)(q22;q12) Adult Acute Myeloid Leukemia With t(16;16)(p13;q22) Adult Acute Myeloid Leukemia With t(8;21)(q22;q22) Recurrent Adult Acute Myeloid | Drug: decitabine Biological: natural killer cell therapy Biological: aldesleukin Other: laboratory biomarker analysis                                                                                                                                                                                                           | Incidence of toxicities graded by using the Common Terminology Criteria for Adverse Events (CTCAE) version 4 DLTs (dose limiting toxicities) defined by occurrence of life-threatening consequences within 4 hours of infusion graded using CTCAE version 4.0 Therapeutic response of these combinations of agents in patients ORR Detect infused NK cells in vivo by donor-specific short tandem repeats in the Histocompatibility laboratory at Ohio state University. | Phase 1         | 8       | 21-Apr-15  | 9-Mar-20   |           |
| IL-21 | NCT00389285 | Study of Recombinant Interleukin 21 in Combination With Sorafenib for Metastatic Renal Cell Carcinoma                                                                                                                                     | Completed | Carcinoma, Renal Cell                                                                                                                                                                                                                                                                                                                             | Drug: rIL-21 only Drug: rIL-21 + sorafenib                                                                                                                                                                                                                                                                                      | Safety profile, including incidence and severity of adverse events Objective response rate at recommended dose of rIL-21 Progression-free survival at recommended dose of rIL-21 Pharmacokinetic profiles of rIL-21 and sorafenib                                                                                                                                                                                                                                        | Phase 1 Phase 2 | 52      | Oct-06     | 27-May-09  |           |
| IL-21 | NCT01629758 | Safety Study of IL-21/Anti-PD-1 Combination in the Treatment of Solid Tumors                                                                                                                                                              | Completed | Neoplasms by Site                                                                                                                                                                                                                                                                                                                                 | Biological: Denenicok Biological: Nivolumab                                                                                                                                                                                                                                                                                     | Safety, as measured by the rate of adverse events and serious adverse events Efficacy as measured by tumor assessment (RECIST) Immunogenicity as measured by incidence of specific antidrug antibodies (ADA) to BMS-98470 and BMS-936558                                                                                                                                                                                                                                 | Phase 1         | 33      | Jun-12     | 6-Mar-15   |           |

|       |             |                                                                                                                                                                                                          |           |                                                                                 |                                                                                                                                                                                 |                                                                                                                                                                                                                                                                                                                                                                                                                                                                                                                                                                                                                                                                                                                                                                                                                                                                                                                                                                                                                                                                                             |                 |     |           |                |
|-------|-------------|----------------------------------------------------------------------------------------------------------------------------------------------------------------------------------------------------------|-----------|---------------------------------------------------------------------------------|---------------------------------------------------------------------------------------------------------------------------------------------------------------------------------|---------------------------------------------------------------------------------------------------------------------------------------------------------------------------------------------------------------------------------------------------------------------------------------------------------------------------------------------------------------------------------------------------------------------------------------------------------------------------------------------------------------------------------------------------------------------------------------------------------------------------------------------------------------------------------------------------------------------------------------------------------------------------------------------------------------------------------------------------------------------------------------------------------------------------------------------------------------------------------------------------------------------------------------------------------------------------------------------|-----------------|-----|-----------|----------------|
| IL-21 | NCT00347971 | Study of Recombinant Interleukin 21 in Combination With Rituxan for Non-Hodgkin's Lymphoma                                                                                                               | Completed | Lymphoma, Non-Hodgkin                                                           | Drug: recombinant human interleukin 21 and rituximab                                                                                                                            | Incidence and severity of adverse events through 1 month after completing treatment Incidence and grade of clinical laboratory abnormalities through 1 month after treatment Disease response by the International Workshop to Standardize Response Criteria for Non-Hodgkin's Lymphomas 2 weeks after completion of the first treatment cycle Immunogenicity by incidence of anti-rIL-21 antibodies up to 1 month after treatment                                                                                                                                                                                                                                                                                                                                                                                                                                                                                                                                                                                                                                                          | Phase 1         | 23  | Jun-06    | 5-Sep-08       |
| IL-21 | NCT00523380 | Efficacy Study of Recombinant Interleukin-21 in the Treatment of Ovarian Cancer                                                                                                                          | Completed | Cancer Ovarian Cancer                                                           | Drug: recombinant interleukin-21 Drug: caelyx (pegylated liposomal doxorubicin)                                                                                                 | Efficacy of treatment assessed by overall response rate (RR). RR measured and recorded using imaging techniques, CA-125 blood samples and pelvic examination. Pharmacokinetics IL-21 antibody formation Progression free survival Patient                                                                                                                                                                                                                                                                                                                                                                                                                                                                                                                                                                                                                                                                                                                                                                                                                                                   | Phase 2         | 10  | 4-Oct-07  | 1-Mar-17       |
| IL-21 | NCT00336986 | Efficacy Study of IL-21 to Treat Metastatic Melanoma                                                                                                                                                     | Completed | Cancer Malignant Melanoma                                                       | Drug: recombinant interleukin-21                                                                                                                                                | Tumor size assessed according to international criteria Serum levels of antibodies against recombinant human IL-21. Markers of immunomodulation in blood. Safety                                                                                                                                                                                                                                                                                                                                                                                                                                                                                                                                                                                                                                                                                                                                                                                                                                                                                                                            | Phase 2         | 54  | Sep-04    | 11-Nov-16      |
| IL-21 | NCT01152788 | Phase II Study of Interleukin-21 (rIL-21) vs Dacarbazine (DTIC) in Patients With Metastatic or Recurrent                                                                                                 | Completed | Melanoma                                                                        | Drug: rIL-21 Drug: Dacarbazine                                                                                                                                                  | Progression Free Survival Response Rate Overall Survival Safety and Toxicity Profile (Participants With Grade 3 4 5 Adverse Event)                                                                                                                                                                                                                                                                                                                                                                                                                                                                                                                                                                                                                                                                                                                                                                                                                                                                                                                                                          | Phase 2         | 64  | Jun-10    | 9-Aug-19       |
| IL-21 | NCT00617253 | Combination of Recombinant Human IL-21 (rIL-21) and Sunitinib in Stage IV Renal Cell Carcinoma Patients                                                                                                  | Completed | Cancer Renal Cell Carcinoma                                                     | Drug: recombinant interleukin-21 Drug: sunitinib                                                                                                                                | Toxicity according to CTCAE version 3.0 Pharmacokinetics rIL-21 antibodies                                                                                                                                                                                                                                                                                                                                                                                                                                                                                                                                                                                                                                                                                                                                                                                                                                                                                                                                                                                                                  | Phase 2         | 9   | 12-Jul-07 | 1-Mar-17       |
| IL-21 | NCT00095108 | Study of Interleukin-21 for Metastatic Malignant Melanoma and Metastatic Kidney Cancer                                                                                                                   | Completed | Melanoma Kidney Neoplasms Metastases                                            | Drug: Recombinant Human Interleukin-21                                                                                                                                          | To determine the maximum tolerated dose (MTD) of rIL-21 To further characterize the safety of rIL-21 at the MTD Characterize pharmacokinetics of rIL-21 Evaluate immunogenicity of rIL-21 Identify clinical or biological parameters that may correlate with                                                                                                                                                                                                                                                                                                                                                                                                                                                                                                                                                                                                                                                                                                                                                                                                                                | Phase 1         | 43  | May-04    | 9-Mar-09       |
| IL-21 | NCT00514085 | Interleukin-21 in Treating Patients With Metastatic or Recurrent Malignant Melanoma                                                                                                                      | Completed | Melanoma (Skin)                                                                 | Biological: recombinant human interleukin-21 Other: immunohistochemistry staining method Other: laboratory biomarker analysis Other: pharmacological study                      | Objective tumor response as assessed by RECIST Overall response rate (complete and partial) Stable disease rate Progressive disease rate Median time to progression Response duration (median and range)                                                                                                                                                                                                                                                                                                                                                                                                                                                                                                                                                                                                                                                                                                                                                                                                                                                                                    | Phase 2         | 40  | Jul-07    | 28-Nov-16      |
| IL-21 | NCT01489059 | Safety Study of IL-21/Ipilimumab Combination in the Treatment of Melanoma                                                                                                                                | Completed | Melanoma                                                                        | Biological: BMS-982470 (recombinant interleukin-21) Biological: Ipilimumab                                                                                                      | Part1 (Dose Escalation): The Maximum tolerated dose (MTD) of BMS-982470 using 2 distinct schedules when administered in combination with Ipilimumab Part 2 (Cohort Escalation): Safety and tolerability of the MTD dose for each of the schedules Efficacy of BMS-982470 in combination with Ipilimumab as measured by objective response Area under the serum concentration-time curve from time zero to the last quantifiable concentration [AUC(0-T)] of BMS-982470 and Ipilimumab Area under the serum concentration-time curve in one dosing interval [AUC(TAU)] of BMS-982470 and Ipilimumab Area under the serum concentration-time curve from time zero extrapolated to infinite time [AUC(INF)] of BMS-982470 and Ipilimumab The maximum observed serum concentration (Cmax) of BMS-982470 and Ipilimumab Trough observed serum concentration (Cmin) of BMS-982470 and Ipilimumab The time of maximum observed serum concentration (Tmax) of BMS-982470 and Ipilimumab Serum half-life (T-HALF) of BMS-982470 and Ipilimumab Apparent total body clearance (CLT) of BMS-982470 and | Phase 1         | 42  | Dec-11    | 29-Aug-14      |
| IL-3  | NCT00397579 | DT388IL3 Fusion Protein in Treating Patients With Acute Myeloid Leukemia or Myelodysplastic                                                                                                              | Completed | Leukemia Myelodysplastic Syndromes Blastic Plasmacytoid Dendritic Cell Neoplasm | Drug: DT388IL3                                                                                                                                                                  | Overall Response Rate (CR+PR+SD): Percentage of Participants Experiencing Response                                                                                                                                                                                                                                                                                                                                                                                                                                                                                                                                                                                                                                                                                                                                                                                                                                                                                                                                                                                                          | Phase 1 Phase 2 | 11  | May-13    | April 23, 2019 |
| IL-3  | NCT00001269 | Phase I Trial of FLAC (5-Fluorouracil, Leucovorin, Adriamycin, Cytosin) Plus GM-CSF (Granulocyte-Macrophage Colony Stimulating Factor) Plus Dose Escalation of IL-3 (Interleukin-3) in Metastatic Breast | Completed | Breast Neoplasms Neoplasm Metastasis                                            | Drug: IL-3                                                                                                                                                                      |                                                                                                                                                                                                                                                                                                                                                                                                                                                                                                                                                                                                                                                                                                                                                                                                                                                                                                                                                                                                                                                                                             | Phase 1         | 100 | May-91    | 4-Mar-08       |
| IL-3  | NCT01632852 | A Study of CSL362 in Patients With CD123+ Acute Myeloid Leukemia Currently in Remission                                                                                                                  | Completed | Leukemia, Myeloid, Acute                                                        | Biological: CSL362                                                                                                                                                              | Frequency and Severity of Adverse Events (AEs) Dose-limiting toxicity (DLT) evaluation Pharmacokinetic (PK) Parameters Number of subjects developing antibodies against CSL362                                                                                                                                                                                                                                                                                                                                                                                                                                                                                                                                                                                                                                                                                                                                                                                                                                                                                                              | Phase 1         | 30  | Jul-12    | 9-Oct-15       |
| IL-3  | NCT00007904 | Adjuvant Stage 2-3A Breast Cancer With Positive Lymph Nodes                                                                                                                                              | Completed | Breast Cancer                                                                   | Biological: filgrastim Drug: cyclophosphamide Drug: doxorubicin hydrochloride Drug: paclitaxel Drug: tamoxifen citrate Procedure: adjuvant therapy Radiation: radiation therapy | To determine the safety of administering continuous infusion paclitaxel with dose intense cyclophosphamide To determine the incidence of febrile neutropenia with the first cycle of therapy. To determine days of neutrophil counts below 500/uL on this regimen during the first treatment cycle. To evaluate dose delays and dose reductions of this regimen. To determine disease-free and overall survival of this regimen. Quality of life as assessed by Functional Assessment of Cancer Therapy-Breast (FACT-B) questionnaire Correlation of Her2/neu overexpression with disease-free and overall survival                                                                                                                                                                                                                                                                                                                                                                                                                                                                         | Phase 2         | 16  | Jul-00    | 2-Oct-12       |
| IL-3  | NCT00001272 | A Phase I Study of Taxol, Cisplatin, Cyclophosphamide and Granulocyte Colony-Stimulating Factor (G-CSF) in Previously Nontreated Ovarian Cancer Patients                                                 | Completed | Ovarian Neoplasms                                                               | Drug: taxol                                                                                                                                                                     |                                                                                                                                                                                                                                                                                                                                                                                                                                                                                                                                                                                                                                                                                                                                                                                                                                                                                                                                                                                                                                                                                             | Phase 1         | 60  | Sep-91    | 4-Mar-08       |

|      |             |                                                                                                                                                                     |            |                                                                                                                                                                                                |                                                                                                                                                                                                                                                                                                  |                                                                                                                                                                                                                                                                                                                                                                                                                                                                                                                                                                                                                                                                                                                                                                         |                 |     |            |                |
|------|-------------|---------------------------------------------------------------------------------------------------------------------------------------------------------------------|------------|------------------------------------------------------------------------------------------------------------------------------------------------------------------------------------------------|--------------------------------------------------------------------------------------------------------------------------------------------------------------------------------------------------------------------------------------------------------------------------------------------------|-------------------------------------------------------------------------------------------------------------------------------------------------------------------------------------------------------------------------------------------------------------------------------------------------------------------------------------------------------------------------------------------------------------------------------------------------------------------------------------------------------------------------------------------------------------------------------------------------------------------------------------------------------------------------------------------------------------------------------------------------------------------------|-----------------|-----|------------|----------------|
| IL-3 | NCT0006225  | Peripheral Stem Cell Transplantation in Treating Patients With Breast Cancer or Hematologic Cancer                                                                  | Completed  | Breast Cancer Leukemia Lymphoma Multiple Myeloma and Neoplasm Myelodysplastic/Myeloproliferative Diseases                                                                                      | Biological: filgrastim Biological: recombinant flt3 ligand Biological: recombinant thrombopoietin Biological: recombinant interleukin-3 Procedure: in vitro-treated peripheral blood stem cell transplantation                                                                                   |                                                                                                                                                                                                                                                                                                                                                                                                                                                                                                                                                                                                                                                                                                                                                                         | Phase 1 Phase 2 |     | Nov-99     | 6-Jun-12       |
| IL-3 | NCT01049854 | CD34+ Selection for Partially Matched Family or Matched Unrelated Adult Donor Transplant                                                                            | Completed  | Leukemia Lymphoma Bone Marrow Failure Immunodeficiencies Histiocytosis Sickle Cell Disease Beta Thalassemia Inborn Errors of Metabolism                                                        | Drug: Full Intensity with TBI Drug: Full Intensity Drug: Reduced Intensity Drug: Reduced Intensity (Fanconi)                                                                                                                                                                                     | The safety CD34+ stem cell selection Immune reconstitution (T, B, DC) following CD34+ selection                                                                                                                                                                                                                                                                                                                                                                                                                                                                                                                                                                                                                                                                         | Phase 2         | 20  | Sep-11     | 21-Aug-18      |
| IL-4 | NCT00039052 | Intravenous Interleukin-4 PE38KDEL Cytotoxin in Treating Patients With Recurrent or Metastatic Kidney Cancer, Non-Small Cell Lung Cancer, or Breast Cancer          | Completed  | Breast Cancer Kidney Cancer Lung Cancer                                                                                                                                                        | Biological: interleukin-4 PE38KDEL cytotoxin                                                                                                                                                                                                                                                     |                                                                                                                                                                                                                                                                                                                                                                                                                                                                                                                                                                                                                                                                                                                                                                         | Phase 1         |     | Jan-02     | 18-Jul-13      |
| IL-4 | NCT00014677 | NBI-3001 Followed by Surgery in Treating Patients With Recurrent Glioblastoma Multiforme                                                                            | Completed  | Brain and Central Nervous System Tumors                                                                                                                                                        | Biological: interleukin-4 PE38KDEL cytotoxin Procedure: conventional surgery                                                                                                                                                                                                                     |                                                                                                                                                                                                                                                                                                                                                                                                                                                                                                                                                                                                                                                                                                                                                                         | Phase 2         |     | Mar-01     | 18-Jul-13      |
| IL-4 | NCT00000769 | A Phase III Study of Recombinant Interleukin-4 in AIDS and Kaposi's Sarcoma                                                                                         | Completed  | Sarcoma, Kaposi HIV Infections                                                                                                                                                                 | Drug: Interleukin-4                                                                                                                                                                                                                                                                              |                                                                                                                                                                                                                                                                                                                                                                                                                                                                                                                                                                                                                                                                                                                                                                         | Phase 1         | 48  |            | 1-May-12       |
| IL-4 | NCT02494206 | Immunotherapy for the Treatment of Breast Cancer Related Upper Extremity Lymphedema (BCRL)                                                                          | Completed  | Breast Cancer Upper Extremity Lymphedema                                                                                                                                                       | Drug: QBX258                                                                                                                                                                                                                                                                                     | Volume Changes as Measured by Perometry                                                                                                                                                                                                                                                                                                                                                                                                                                                                                                                                                                                                                                                                                                                                 | Not Applicable  | 9   | Jul-15     | 8-Nov-18       |
| IL-4 | NCT00923910 | Wilm's Tumor 1 Protein Vaccine to Treat Cancers of the Blood                                                                                                        | Completed  | Leukemia, Acute Myelogenous (AML) Leukemia, Acute Lymphocytic (ALL) Leukemia, Chronic Myelogenous (CML) Myelodysplastic Syndrome (MDS) Non-Hodgkin's Lymphoma (NHL)                            | Drug: WT1 Peptide-Pulsed Dendritic Cells Drug: Donor Lymphocytes Drug: IL-4 Drug: KLH Drug: WT1 Peptides Drug: Endotoxin Drug: Diphenhydramine Drug:                                                                                                                                             | Toxicity Number of Participants With Graft Versus Host Disease (GVHD) Greater Than or Equal to Grade 3 Time to Immune Response Wilm's Tumor 1 (WT1) Enzyme-Linked Immunospot (ELISpot) Wilm's Tumor (WT1) Delayed-type Hypersensitivity (DTH) Keyhole Limpet Hemocyanin (KLH) Delayed-type Hypersensitivity (DTH) Number of Participants                                                                                                                                                                                                                                                                                                                                                                                                                                | Phase 1 Phase 2 | 10  | 22-Feb-08  | April 12, 2017 |
| IL-4 | NCT00001564 | A Pilot Study of Tumor-Specific Peptide Vaccination and IL-2 With or Without Autologous T Cell Transplantation in Recurrent                                         | Completed  | Ewing's Sarcoma Rhabdomyosarcoma                                                                                                                                                               | Drug: EF-1 Peptide Drug: EF-2 Peptide Drug: PFK Peptide Drug: E7 Peptide Drug: IL-2 Drug: IL-4 Drug: GM-CSF Drug: CD40 Ligand                                                                                                                                                                    |                                                                                                                                                                                                                                                                                                                                                                                                                                                                                                                                                                                                                                                                                                                                                                         | Phase 2         | 30  | 23-Dec-96  | 29-Nov-19      |
| IL-4 | NCT00245037 | Busulfan, Fludarabine, and Total-Body Irradiation in Treating Patients Who Are Undergoing a Donor Stem Cell Transplant for Hematologic Cancer                       | Completed  | Chronic Myeloproliferative Disorders Leukemia Lymphoma Multiple Myeloma and Plasma Cell Neoplasm Myelodysplastic Syndromes Myelodysplastic/Myeloproliferative Neoplasms Precancerous Condition | Biological: therapeutic allogeneic lymphocytes Drug: busulfan Drug: cyclosporine Drug: fludarabine phosphate Drug: mycophenolate mofetil Procedure: peripheral blood stem cell transplantation Radiation: Total Body Irradiation (TBI) Drug: Granulocyte colony-stimulating factor (G-CSF) Drug: | Regimen-Related Toxicities Non-relapse Mortality Overall Survival Progression-Free Survival Relapse Mortality Acute Graft-Versus-Host Disease (aGVHD) Outcome Chronic Graft-Versus-Host Disease (cGVHD) Outcome                                                                                                                                                                                                                                                                                                                                                                                                                                                                                                                                                         | Phase 1 Phase 2 | 147 | Jun-05     | 27-Sep-17      |
| IL-6 | NCT00433446 | S0354, Anti-IL-6 Chimeric Monoclonal Antibody in Patients With Metastatic Prostate Cancer That Did Not Respond to Hormone Therapy                                   | Completed  | Prostate Cancer                                                                                                                                                                                | Biological: CNTO 328                                                                                                                                                                                                                                                                             | Confirmed Prostate-Specific Antigen (PSA) Response Progression-free Survival (PFS) Overall Survival (OS) Objective Response (Confirmed and Unconfirmed Complete and Partial Response) Among Those Patients With Measurable Disease Number of Patients With Grade 3 Through Grade 5 Adverse Events That Are Related to Study Drug                                                                                                                                                                                                                                                                                                                                                                                                                                        | Phase 2         | 62  | April 2007 | 5-Feb-13       |
| IL-6 | NCT00470093 | Interferon Alfa and Interleukin-6 in Treating Patients With Recurrent Multiple Myeloma                                                                              | Terminated | Multiple Myeloma and Plasma Cell Neoplasm                                                                                                                                                      | Biological: recombinant interferon- $\alpha$  Biological: recombinant interleukin-6                                                                                                                                                                                                              | Response Rate as Assessed by Number of Participants With Partial or Complete Response by Blad $\acute{e}$ Criteria. Toxicity as Measured by Number of Participants Who Discontinued Treatment Due to Adverse Events Optimal Dose of Interleukin-6 Impact of                                                                                                                                                                                                                                                                                                                                                                                                                                                                                                             | Phase 3         | 3   | Oct-07     | 16-Nov-18      |
| IL-6 | NCT00911859 | A Study to Compare CNTO 328 (Anti-IL-6 Monoclonal Antibody) and VELCADE-Melphalan-Prednisone (VMP) With VMP Alone in Previously Untreated Multiple Myeloma Patients | Completed  | Multiple Myeloma                                                                                                                                                                               | Drug: Siltuximab 11 mg/kg Drug: Siltuximab 8.3 mg/kg or 11 mg/kg Drug: Velcade (bortezomib) Drug: Melphalan Drug: Prednisone                                                                                                                                                                     | Percentage of Participants Who Achieved Complete Response (CR) - European Group for Blood and Marrow Transplantation (EBMT) Criteria Percentage of Participants Who Achieved Overall Response ie, Complete Response (CR) or Partial Response (PR) - European Group for Blood and Marrow Transplantation (EBMT) Criteria Percentage of Participants Who Achieved Stringent Complete Response (sCR) - International Myeloma Working Group (IMWG) Criteria Progression-Free Survival (PFS) 1-year Progression-Free Survival (PFS) Rate Duration of Response (DOR) 1-year Survival Rate Overall Survival Change From Baseline to Cycle 9 in Global Health Status/Quality of Life Subscale of the European Organization for Research and Treatment of Cancer Quality of Life | Phase 3         | 118 | Jun-09     | 18-Nov-14      |
| IL-6 | NCT01484275 | A Study of Siltuximab (Anti-IL 6 Monoclonal Antibody) in Patients With High-risk Smoldering Multiple Myeloma                                                        | Completed  | High-risk Smoldering Multiple Myeloma                                                                                                                                                          | Drug: Siltuximab Drug: Placebo                                                                                                                                                                                                                                                                   | One-Year Progression-Free Survival (PFS) Rate Progressive Disease Indicator Rate (PDIR) at 6 Months Progression-Free Survival Percentage of Participants With Serum M-protein Response Time to Worsening in European Organization for Research and Treatment of Cancer, Quality of Life Questionnaire-Core 30 (EORTC-QLQ-C30) Scale Score Time to Worsening in the Brief Pain Inventory (BPI) Worst Item Scores Number of Participants With Symptomatic Multiple Myeloma With Adverse Prognostic Features Number of Participants With Best Response to First Subsequent Multiple                                                                                                                                                                                        | Phase 3         | 85  | 1-Mar-12   | 27-Jan-20      |
| IL-6 | NCT00385827 | A Safety and Efficacy Study of Siltuximab (CNTO 328) in Male Subjects With Metastatic Hormone-Refractory Prostate Cancer (HRPC)                                     | Terminated | Cancer, Prostate                                                                                                                                                                               | Drug: Mitoxantrone Drug: Siltuximab Drug: Prednisone                                                                                                                                                                                                                                             | Part 1: Number of Participants With Adverse Events (AEs) and Serious Adverse Events (SAEs) Part 2: Progression Free Survival (PFS) Time to Clinical Deterioration (TICD) Number of Participants With Palliative Response Number of Participants With Prostate Specific Antigen (PSA) Response Overall Survival (OS)                                                                                                                                                                                                                                                                                                                                                                                                                                                     | Phase 2         | 106 | Nov-06     | 20-Aug-14      |

|      |             |                                                                                                                                                                          |           |                                                                                                    |                                                                                        |                                                                                                                                                                                                                                                                                                                                                                                                                                                                                                                                                                                                                                                                                                                                                                                                                                                                                                                                                                                                                                                                                                                                                                                                                                                                                                                                                                                      |                 |     |           |           |
|------|-------------|--------------------------------------------------------------------------------------------------------------------------------------------------------------------------|-----------|----------------------------------------------------------------------------------------------------|----------------------------------------------------------------------------------------|--------------------------------------------------------------------------------------------------------------------------------------------------------------------------------------------------------------------------------------------------------------------------------------------------------------------------------------------------------------------------------------------------------------------------------------------------------------------------------------------------------------------------------------------------------------------------------------------------------------------------------------------------------------------------------------------------------------------------------------------------------------------------------------------------------------------------------------------------------------------------------------------------------------------------------------------------------------------------------------------------------------------------------------------------------------------------------------------------------------------------------------------------------------------------------------------------------------------------------------------------------------------------------------------------------------------------------------------------------------------------------------|-----------------|-----|-----------|-----------|
| IL-6 | NCT00401843 | A Study of the Safety and Efficacy of CNTO 328 and Bortezomib to Bortezomib Alone in Patients With Relapsed or Refractory Multiple Myeloma                               | Completed | Multiple Myeloma                                                                                   | Biological: Siltuximab Drug: Bortezomib Drug: Dexamethasone Drug: Placebo Drug:        | Progression-free Survival Number of Participants With Adverse Events (AEs) or Serious Adverse Events (SAEs) Percentage of Participants With Best Confirmed Response of Complete Response (CR) or Partial Response (PR) (Overall Response Rate) Percentage of Participants With Confirmed Complete Response (CR Rate) Overall Survival                                                                                                                                                                                                                                                                                                                                                                                                                                                                                                                                                                                                                                                                                                                                                                                                                                                                                                                                                                                                                                                | Phase 4         | 307 | 28-Nov-06 | 19-Nov-19 |
| IL-6 | NCT00330161 | Vorinostat in Treating Patients With Progressive Metastatic Prostate Cancer                                                                                              | Completed | Recurrent Prostate Cancer Stage IV Prostate Cancer                                                 | Drug: vorinostat Other: laboratory biomarker analysis                                  | Proportion of Patients Who do Not Demonstrate Disease Progression Incidence of Toxicity Rate of PSA Decline Progression-free Survival Median Survival Objective                                                                                                                                                                                                                                                                                                                                                                                                                                                                                                                                                                                                                                                                                                                                                                                                                                                                                                                                                                                                                                                                                                                                                                                                                      | Phase 2         | 29  | Mar-06    | 26-May-14 |
| IL-6 | NCT01531998 | Lenalidomide/Bortezomib/Dexamethasone & CNTO 328 in Transplant Eligible Newly Diagnosed Multiple Myeloma                                                                 | Completed | Myeloma                                                                                            | Drug: Lenalidomide Drug: Bortezomib Drug: Siltuximab Drug: Dexamethasone Behavioral:   | Maximum Tolerated Dose (MTD) of Siltuximab Number of Participants With Response                                                                                                                                                                                                                                                                                                                                                                                                                                                                                                                                                                                                                                                                                                                                                                                                                                                                                                                                                                                                                                                                                                                                                                                                                                                                                                      | Phase 4         | 14  | May-12    | 19-Jun-15 |
| IL-6 | NCT01637532 | Feasibility of the Combination of Chemotherapy (Carbo/Caelyx or Carbo/Doxorubicin) With Tocilizumab (mAb IL-6R) and Peg-Intron in Patients With Recurrent Ovarian Cancer | Completed | Recurrent Ovarian Cancer                                                                           | Drug: tocilizumab and interferon alpha 2-b Drug: Carboplatin and Caelyx or doxorubicin | The feasibility (NCI-CTCv4.0) to combine carboplatin and PLD or doxorubicin with tocilizumab as well as with tocilizumab and Peg-Intron The effect of chemotherapy on the immune system The relation between anti-tumor immunity and clinical outcome                                                                                                                                                                                                                                                                                                                                                                                                                                                                                                                                                                                                                                                                                                                                                                                                                                                                                                                                                                                                                                                                                                                                | Phase 1 Phase 2 | 21  | Feb-11    | 26-Jan-16 |
| IL-6 | NCT00841191 | A Safety, Efficacy and Pharmacokinetic Study of Siltuximab (CNTO 328) in Participants With Solid Tumors                                                                  | Completed | Ovarian Neoplasms Pancreatic Neoplasms Colorectal Neoplasms Head and Neck Neoplasms Lung Neoplasms | Drug: CNTO 328; Anti-interleukin-6 monoclonal antibody                                 | Percentage of Participants With Clinical Benefit Response (CBR) Percentage of Participants With Overall Response Number of Participants With Tumor Marker Response Percentage of Participants With Hemoglobin (Hb) Response Progression Free Survival (PFS) Overall Survival (OS) European Organization for Research and Treatment of Cancer Quality of Life Questionnaire (EORTC QLQ-C30) Score Change From Baseline in European Organization for Research and Treatment of Cancer Quality of Life Questionnaire (EORTC QLQ-OV28) Score at Week 4 After Last Dose Administration Area Under the Curve From Time Zero to Extrapolated Infinite Time (AUC[0-inf]) Area Under the Curve From Time Zero to Last Quantifiable Concentration (AUC[0-t]) Minimum Observed Serum Concentration at Steady-State (Cmin,ss) Maximum Observed Serum Concentration (Cmax) Terminal Elimination Half Life (t1/2) Total Systemic Clearance (CL) Volume of Distribution at Steady State (Vss) Percent Change From Baseline in C-Reactive Protein (CRP) Level Percent Change From Baseline in Inflammatory Cytokines Level Percent Change From Baseline in the Angiogenesis Related Factors Level Percent Change From Baseline in Interleukin 6 Receptor (IL-6R) Subunits Level Number of Participants Assessed Positive for Antibodies to Siltuximab Percent Change From Baseline in Hepcidin Level | Phase 1 Phase 2 | 84  | Mar-09    | 14-May-14 |
| IL-6 | NCT01219010 | A Study Evaluating the Effects of Siltuximab on the Heart in Patients With Monoclonal Gammopathy of Undetermined Significance, Smoldering Multiple Myeloma, or           | Completed | Monoclonal Gammopathy of Undetermined Significance Multiple Myeloma Plasma Cell Neoplasm           | Biological: Siltuximab                                                                 | QTc interval Additional safety evaluations Efficacy evaluations Pharmacokinetic and Pharmacodynamic evaluations                                                                                                                                                                                                                                                                                                                                                                                                                                                                                                                                                                                                                                                                                                                                                                                                                                                                                                                                                                                                                                                                                                                                                                                                                                                                      | Phase 1         | 30  | Oct-10    | 19-Jan-15 |
| IL-6 | NCT00402181 | An Efficacy and Safety Study of Siltuximab in Participants With Relapsed or Refractory Multiple Myeloma                                                                  | Completed | Multiple Myeloma                                                                                   | Biological: Siltuximab Drug: Dexamethasone                                             | Percentage of Participants With Overall Response Time to Progression (TTP) Duration of Response Number of Participants With Immune Response Percent Change From Baseline in C-Reactive Protein (CRP) Level Percent Change From Baseline in C-telopeptide (CTx) Level Percent Change From Baseline in N-telopeptide (NTx) Level                                                                                                                                                                                                                                                                                                                                                                                                                                                                                                                                                                                                                                                                                                                                                                                                                                                                                                                                                                                                                                                       | Phase 2         | 53  | Oct-06    | 14-May-14 |
| IL-6 | NCT00412321 | A Safety and Efficacy Study of CNTO 328 in Patients With B-Cell Non-Hodgkin's Lymphoma, Multiple Myeloma, or Castleman's Disease                                         | Completed | Lymphoma, Non-Hodgkin Multiple Myeloma Giant Lymph Node Hyperplasia                                | Drug: CNTO 328                                                                         | Number of Patients With Adverse Events as a Measure of Safety and Tolerability Serum Concentration of CNTO 328 Pharmacodynamics of CNTO 328 Plasma antibodies to CNTO 328 Number of participants with Castleman's disease who achieved tumor response Number of participants with multiple myeloma who achieved disease response Number of participants with B-cell non-Hodgkin's lymphoma and multiple myeloma who achieved clinical benefit (CB) Number of participants with Castleman's disease who achieved clinical benefit Number of participants with B-cell non-Hodgkin's                                                                                                                                                                                                                                                                                                                                                                                                                                                                                                                                                                                                                                                                                                                                                                                                    | Phase 1         | 67  | May-05    | 1-Jul-14  |
| IL-6 | NCT00943839 | Sunitinib Malate in Treating Patients With Kidney Cancer                                                                                                                 | Completed | Kidney Cancer                                                                                      | Drug: sunitinib malate Other: laboratory biomarker analysis Other: pharmacological     | Disease response VEGF and IL-8 blood levels determined before and every 6 weeks during treatment Length of the response Disease-free survival Overall survival                                                                                                                                                                                                                                                                                                                                                                                                                                                                                                                                                                                                                                                                                                                                                                                                                                                                                                                                                                                                                                                                                                                                                                                                                       | Not Applicable  | 60  | Feb-09    | 10-Nov-16 |
| IL-6 | NCT00265135 | A Study of CNTO 328 in Subjects With Metastatic Renal Cell Carcinoma                                                                                                     | Completed | Carcinoma, Renal Cell                                                                              | Drug: CNTO 328                                                                         | Number of Patients With Dose-limiting Toxicity as a Measure of Safety (Parts 1 and 3) Number of Patients With Tumor Response (Parts 2 and 3) Serum Concentration of CNTO 328 (Parts 1, 2, and 3) Number of Participants With Adverse Events (Parts 1, 2, and 3) Change From Baseline in C-reactive Protein (Part 1) Change From Baseline in Interleukin-6 levels (Part 1) Serum Antibodies to CNTO 328 (Parts 1, 2, and 3) Number of Patients With Clinical Benefit (Parts 1, 2, and 3) Time to disease progression (Parts 2 and 3) Duration of Tumor Response (Parts 2 and 3) Number of Patients With an Overall Tumor Response (Parts 2 and 3) Change From Baseline in Quality of Life Measured Using Functional Assessment of Chronic Illness Therapy (FACIT) - Fatigue questionnaire (Parts 1, 2, and 3) Change From Baseline in C-reactive Protein (Parts 2 and 3) Change                                                                                                                                                                                                                                                                                                                                                                                                                                                                                                       | Phase 1 Phase 2 | 68  | Aug-03    | 3-Jul-14  |

|                 |             |                                                                                                                                                        |           |                                                                                                                                                               |                                                                                                                                             |                                                                                                                                                                                                                                                                                                                                                                                                                                                                                                                                                                                                                                                                                                                                                                                                                                                                                                                                                                                                                                                                                                                                                         |                 |    |            |                |
|-----------------|-------------|--------------------------------------------------------------------------------------------------------------------------------------------------------|-----------|---------------------------------------------------------------------------------------------------------------------------------------------------------------|---------------------------------------------------------------------------------------------------------------------------------------------|---------------------------------------------------------------------------------------------------------------------------------------------------------------------------------------------------------------------------------------------------------------------------------------------------------------------------------------------------------------------------------------------------------------------------------------------------------------------------------------------------------------------------------------------------------------------------------------------------------------------------------------------------------------------------------------------------------------------------------------------------------------------------------------------------------------------------------------------------------------------------------------------------------------------------------------------------------------------------------------------------------------------------------------------------------------------------------------------------------------------------------------------------------|-----------------|----|------------|----------------|
| IL-6            | NCT00401765 | A Study of CNTO 328 in Patients With Metastatic Hormone-Refractory Prostate Cancer                                                                     | Completed | Prostatic Neoplasms                                                                                                                                           | Drug: CNTO 328 Drug: Docetaxel                                                                                                              | Number of Patients With Adverse Events as a Measure of Safety and Tolerability Plasma Concentration of Docetaxel Serum Concentration of Docetaxel in Combination With CNTO 328 Number of Patients with Prostate-Specific Antigen (PSA) Response Number of Patients With PSA Reduced Within 3 Months PSA Progression in Patients Duration of Tumor Response Duration of PSA response Objective Tumor Response Pharmacodynamics of CNTO 328 administered in combination with docetaxel Serum concentration of CNTO 328 Serum concentration of CNTO 328 in                                                                                                                                                                                                                                                                                                                                                                                                                                                                                                                                                                                                 | Phase 1         | 40 | Sep-05     | 26-May-14      |
| IL-6            | NCT01484470 | Umbilical Cord Transplantation for the Elderly Population                                                                                              | Completed | Hematologic Malignancies                                                                                                                                      | Biological: StemEx                                                                                                                          | Efficacy of StemEx Time to engraftment                                                                                                                                                                                                                                                                                                                                                                                                                                                                                                                                                                                                                                                                                                                                                                                                                                                                                                                                                                                                                                                                                                                  | Phase 2         | 18 | Jan-10     | 21-Aug-19      |
| IL-6            | NCT00955812 | STAT3 Inhibitor for Solid Tumors                                                                                                                       | Completed | Advanced Cancer Solid Tumor                                                                                                                                   | Drug: OPB-31121                                                                                                                             | Maximum Tolerated Dose (MTD) of OPB-31121                                                                                                                                                                                                                                                                                                                                                                                                                                                                                                                                                                                                                                                                                                                                                                                                                                                                                                                                                                                                                                                                                                               | Phase 1         | 24 | Jun-09     | 12-Feb-13      |
| IL-6            | NCT01212380 | Study of Carfilizomib in Chronic Lymphocytic Leukemia (CLL), Small Lymphocytic Lymphoma (SLL) or Prolymphocytic Leukemia (PLL)                         | Completed | B-cell Chronic Lymphocytic Leukemia Hematopoietic/Lymphoid Cancer Prolymphocytic Leukemia Recurrent Small Lymphocytic Lymphoma Refractory Chronic Lymphocytic | Drug: carfilizomib Other: Cytokine Assessment Other: Pharmacodynamic Studies Other: Proteasome Inhibition Assessment Other: Pharmacogenomic | Determine safety of carfilizomib by evaluating the toxicity profile. To evaluate the efficacy of Carfilizomib therapy in relapsed or refractory chronic lymphocytic leukemia (CLL)/small lymphocytic leukemia (SLL)/prolymphocytic leukemia (PLL)                                                                                                                                                                                                                                                                                                                                                                                                                                                                                                                                                                                                                                                                                                                                                                                                                                                                                                       | Phase 1         | 21 | Oct-10     | 9-May-16       |
| IL-6            | NCT03601611 | Checkpoint Inhibitor Induced Colitis and Arthritis -Immunomodulation With IL-6 Blockade and Exploration of Disease Mechanisms                          | Completed | Solid Tumor Colitis Arthritis                                                                                                                                 | Drug: Tocilizumab (RoACTEMRA®)                                                                                                              | Rate of at least one grade improvement using the NCI CTCAE v5.0 Number of participants with treatment-related adverse events as assessed by CTCAE v4.0 Rate of at least one grade improvement without prednisolone using the NCI CTCAE v5.0 Rate of sustained glucocorticoid-free remission                                                                                                                                                                                                                                                                                                                                                                                                                                                                                                                                                                                                                                                                                                                                                                                                                                                             | Not Applicable  | 20 | 1-Jan-19   | 21-Apr-20      |
| IL-7            | NCT00684008 | Safety Study of IL-7 in Recipients of a Hemopoietic Stem Cell Transplant Peripheral Blood Stem Cell                                                    | Completed | AML CML MDS                                                                                                                                                   | Drug: CYT107 - Recombinant glycosylated human interleukin 7. Drug: rhIL-7 (CYT107)                                                          | Toxicity of CYT107 in post-transplant patients with AML, CML and MDS using the NCI Common Toxicity Criteria version 3.0 with the BMT specific adverse event grading system. Pharmacokinetics and Pharmacodynamics                                                                                                                                                                                                                                                                                                                                                                                                                                                                                                                                                                                                                                                                                                                                                                                                                                                                                                                                       | Phase 1         | 12 | Mar-08     | 26-Jul-12      |
| IL-7            | NCT01368107 | Study Evaluating Impact of IL-7 on CD4 Lymphopenia, Risks of Severe Haematological Toxicity and Tumor Progression in Metastatic Breast Cancer Patients | Completed | Metastatic Breast Cancer                                                                                                                                      | Drug: placebo Drug: interleukin 7                                                                                                           | to determine the optimal schedule to deliver CYT107 during chemotherapy based on restoration of CD4 count to determine if CYT107 treatment enables to reduce the incidence of severe haematological toxicity (any type of haematological toxicity Grade $\geq$ 3) post-chemotherapy To assess the impact of CYT107 on progression-free survival To assess the impact of CYT107 on compliance to chemotherapy regimen (dose intensity, number of chemotherapy cycles). To assess the impact of CYT107 on CD4 lymphopenia over the study period to evaluate if CYT107 treatment will selectively stimulate the proliferation and activation of peripheral immune subsets (analysis of phenotype and activation status of peripheral immune e sub-populations) to evaluate if CYT107 treatment will selectively improve the functional response of T cells, DC subsets and NK cells to evaluate if CYT107 treatment will be able to revert tolerogenic immune burden to increase specific anti-tumor response (measure of antigen specific CD8 response, measure of cytokine plasmatic levels) to evaluate if CYT107 treatment will enable to increase TCR | Phase 2         | 24 | Jun-11     | 9-Feb-15       |
| IL-7            | NCT00062049 | Interleukin-7 in Treating Patients With Refractory Solid Tumors                                                                                        | Completed | Unspecified Adult Solid Tumor, Protocol Specific                                                                                                              | Biological: recombinant interleukin-7                                                                                                       | Quantification of T-cell Responses to Prostatic Acid Phosphatase Granulocyte-macrophage Colony-stimulating Factor (PAP-GM-CSF), Assessed by Quantification of Interferon Gamma Levels Measured Using Enzyme-linked Immunospot (ELISPOT) Change in Bystander Antigen Specific Immune Responses, Measured by Interferon Gamma Production in Response to Various Antigens as Quantified by Enzyme-linked Immunospot (ELISPOT) Change in Circulating Tumor Cells Change in Number of Peripheral Blood Mononuclear Cell (PBMC) Subsets and T Lymphocyte Subsets Change in Prostate Specific Antigen (PSA) Kinetics. Change in Vaccine-induced Antigen-specific                                                                                                                                                                                                                                                                                                                                                                                                                                                                                               | Phase 1         | 30 | April 2003 | 8-Mar-12       |
| IL-7            | NCT01881867 | CYT107 After Vaccine Treatment (Provenge ® ) in Patients With Metastatic Castration-Resistant Prostate Cancer                                          | Completed | Castration Levels of Testosterone Castration-Resistant Prostate Carcinoma Metastatic Prostate Carcinoma Stage IV Prostate Cancer                              | Biological: Glycosylated Recombinant Human Interleukin-7 Other: Laboratory Biomarker Analysis                                               | Quantification of T-cell Responses to Prostatic Acid Phosphatase Granulocyte-macrophage Colony-stimulating Factor (PAP-GM-CSF), Assessed by Quantification of Interferon Gamma Levels Measured Using Enzyme-linked Immunospot (ELISPOT) Change in Bystander Antigen Specific Immune Responses, Measured by Interferon Gamma Production in Response to Various Antigens as Quantified by Enzyme-linked Immunospot (ELISPOT) Change in Circulating Tumor Cells Change in Number of Peripheral Blood Mononuclear Cell (PBMC) Subsets and T Lymphocyte Subsets Change in Prostate Specific Antigen (PSA) Kinetics. Change in Vaccine-induced Antigen-specific                                                                                                                                                                                                                                                                                                                                                                                                                                                                                               | Phase 2         | 54 | 10-Sep-13  | 9-Jul-19       |
| IL-7            | NCT00091338 | Interleukin-7 and Vaccine Therapy in Treating Patients With Metastatic Melanoma                                                                        | Completed | Melanoma (Skin)                                                                                                                                               | Biological: MART-1 antigen Biological: gp100 antigen Biological: incomplete Freund's adjuvant Biological: recombinant                       |                                                                                                                                                                                                                                                                                                                                                                                                                                                                                                                                                                                                                                                                                                                                                                                                                                                                                                                                                                                                                                                                                                                                                         | Phase 1         |    | Aug-04     | April 30, 2015 |
| IL-7            | NCT01265368 | A Clinical Study to Assess Safety and Efficacy of a Tumor Vaccine in Patients With Advanced Renal Cell Carcinoma (ASET)                                | Completed | Stage IV Renal Cell Cancer                                                                                                                                    | Biological: MGN1601                                                                                                                         | Assessment of safety profile of MGN1601 Assessment of potential autoimmune effects of MGN1601 Assessment of the presence of MIDGE vectors Assessment of the immune response to MGN1601 Evaluation of clinical and radiological response to MGN1601                                                                                                                                                                                                                                                                                                                                                                                                                                                                                                                                                                                                                                                                                                                                                                                                                                                                                                      | Phase 1         | 19 | Nov-10     | 15-Nov-18      |
| IL-7            | NCT03619239 | Dose-escalation Study to Evaluate the Safety and Tolerability of GX-17 in Patients With Glioblastoma                                                   | Completed | Newly Diagnosed Glioblastoma                                                                                                                                  | Drug: GX-17                                                                                                                                 | DLT(Dose-Limiting Toxicity) Assessment Incidence, nature and severity of Adverse events PD(pharmacodynamic) profile [ALC result] Anti-tumor Activity [OS] Anti-tumor Activity [PFS] Immunogenicity[ ADA and neutralizing antibody] Exploratory Biomarker                                                                                                                                                                                                                                                                                                                                                                                                                                                                                                                                                                                                                                                                                                                                                                                                                                                                                                | Phase 1         | 15 | 20-Jun-18  | 10-Nov-20      |
| TGF-b inhibitor | NCT00889954 | Her2 and TGFbeta Cytotoxic T Cells in Treatment of Her2 Positive                                                                                       | Completed | HER2 Positive Malignancies                                                                                                                                    | Biological: TGFbeta resistant HER2/EBV-CTLs                                                                                                 | Number of Patients with dose limiting toxicity. Area under the growth curves (AUC) over time for T cell frequencies. Decrease in tumor after the CTL infusion                                                                                                                                                                                                                                                                                                                                                                                                                                                                                                                                                                                                                                                                                                                                                                                                                                                                                                                                                                                           | Phase 1         | 20 | May-09     | 18-Sep-18      |
| TGF-b inhibitor | NCT00043706 | Safety, Tolerability, and Pharmacokinetics of CAT-192 (Human Anti-TGF-Beta1 Monoclonal Antibody) in Patients With Early                                | Completed | Systemic Sclerosis Scleroderma                                                                                                                                | Drug: Human Anti-Transforming Growth Factor Beta-1 Monoclonal Antibody                                                                      |                                                                                                                                                                                                                                                                                                                                                                                                                                                                                                                                                                                                                                                                                                                                                                                                                                                                                                                                                                                                                                                                                                                                                         | Phase 1 Phase 2 |    |            | 5-Mar-15       |
| TGF-b inhibitor | NCT00923169 | Part 2 of Phase 1 Study of GC1008 to Treat Advanced Melanoma (Part 2 Will Only Accept and Treat Patients With Advanced Malignant                       | Completed | Renal Cell Carcinoma                                                                                                                                          | Drug: Anti-Transforming Growth Factor-beta (GC 1008)                                                                                        | To assess the maximum tolerated dose (MTD), dose-limiting toxicity (DLT), and safety of GC1008 in patients with locally advanced or metastatic renal cell carcinoma or malignant melanoma. To obtain pharmacokinetic (PK) and pharmacodynamic (PD) data on GC1008.                                                                                                                                                                                                                                                                                                                                                                                                                                                                                                                                                                                                                                                                                                                                                                                                                                                                                      | Phase 1         | 9  | 9-Jul-06   | 29-Oct-19      |

|                 |             |                                                                                                                        |            |                                                                                                                                                                                                                                                                                                                                                                                                                                                                                                                                                                                                                                                                                                                                                                                                                                                                                                                                                                                                                                                       |                                                                                                                                                                                          |                                                                                                                                                                                                                                                                                                                                                                                                                                                                                                                                                                                                                                                                                                                                                                                                                                                                                                                                                                                                                                                                                                                                                                          |         |     |            |                |
|-----------------|-------------|------------------------------------------------------------------------------------------------------------------------|------------|-------------------------------------------------------------------------------------------------------------------------------------------------------------------------------------------------------------------------------------------------------------------------------------------------------------------------------------------------------------------------------------------------------------------------------------------------------------------------------------------------------------------------------------------------------------------------------------------------------------------------------------------------------------------------------------------------------------------------------------------------------------------------------------------------------------------------------------------------------------------------------------------------------------------------------------------------------------------------------------------------------------------------------------------------------|------------------------------------------------------------------------------------------------------------------------------------------------------------------------------------------|--------------------------------------------------------------------------------------------------------------------------------------------------------------------------------------------------------------------------------------------------------------------------------------------------------------------------------------------------------------------------------------------------------------------------------------------------------------------------------------------------------------------------------------------------------------------------------------------------------------------------------------------------------------------------------------------------------------------------------------------------------------------------------------------------------------------------------------------------------------------------------------------------------------------------------------------------------------------------------------------------------------------------------------------------------------------------------------------------------------------------------------------------------------------------|---------|-----|------------|----------------|
| TGF-b inhibitor | NCT00431561 | Phase IIb Clinical Trial With TGF-β2 Antisense Compound AP 12009 for Recurrent or Refractory High-grade Glioma         | Completed  | Glioblastoma Anaplastic Astrocytoma                                                                                                                                                                                                                                                                                                                                                                                                                                                                                                                                                                                                                                                                                                                                                                                                                                                                                                                                                                                                                   | Drug: AP 12009 10 μM Drug: AP 12009 80 μ M Drug: temozolomide or PCV Device: Drug delivery system for administration of AP 12009 Procedure: Placement of Drug Delivery System            | Overall response rate of two AP 12009 dose groups and control group assessed by the evaluation of tumor size on brain MRI scans Overall survival Response rates Progression-free survival Time to progression Time to response Best of all response rates assessed by survival status and variation of tumor size on brain MRI Change of quality of life and Karnofsky Performance Status (KPS) Best of all response rates Safety and tolerability                                                                                                                                                                                                                                                                                                                                                                                                                                                                                                                                                                                                                                                                                                                       | Phase 2 | 141 | April 2003 | 3-Dec-13       |
| TGF-b inhibitor | NCT00356460 | Safety and Efficacy Study of GC1008 to Treat Renal Cell Carcinoma or Malignant Melanoma                                | Completed  | Carcinoma, Renal Cell Melanoma                                                                                                                                                                                                                                                                                                                                                                                                                                                                                                                                                                                                                                                                                                                                                                                                                                                                                                                                                                                                                        | Biological: GC1008 Human Anti Transforming Growth Factor_β (TGFβ) Monoclonal Antibody Biological: GC1008 Human Anti Transforming Growth Factor_β (TGFβ ) Monoclonal Antibody             | Part 1: To assess the maximum tolerated dose (MTD), dose-limiting toxicity (DLT), and safety of GC1008 in patients with locally advanced or metastatic renal cell carcinoma or malignant melanoma. Part 1: To assess dose-limiting toxicity of GC1008 in patients with locally advanced metastatic renal cell carcinoma or malignant melanoma. Part 1: To assess the safety of GC1008 in patients with locally advanced or metastatic renal cell carcinoma or malignant melanoma. Part 2: To assess the safety of GC1008 following multiple doses at 15 mg/kg (or 10 mg/kg depending on the safety review of the first cohort of 6 patients at 15 mg/kg) in patients with locally advanced or metastatic malignant melanoma. Part 1 & 2: To assess possible surrogate markers that might predict clinical efficacy by obtaining skin (part 2), tumor and blood samples for exploratory biomarker analyses. Part 1 & 2: To obtain pharmacokinetic (PK) and pharmacodynamic (PD) data on GC1008. Part 1 & 2: To evaluate tumor response as a preliminary assessment of clinical activity. Part 2: To evaluate the relationship between GC1008 exposure, clinical response. | Phase 1 | 29  | Sep-06     | 19-Mar-14      |
| TGF-b inhibitor | NCT01112293 | Anti-TGF Monoclonal Antibody (GC1008) in Relapsed Malignant Pleural Mesothelioma                                       | Completed  | Pleural Malignant Mesothelioma                                                                                                                                                                                                                                                                                                                                                                                                                                                                                                                                                                                                                                                                                                                                                                                                                                                                                                                                                                                                                        | Drug: GC1008                                                                                                                                                                             | 3-month PFS rate Estimate the distribution of progression-free and over survival                                                                                                                                                                                                                                                                                                                                                                                                                                                                                                                                                                                                                                                                                                                                                                                                                                                                                                                                                                                                                                                                                         | Phase 2 | 14  | April 2010 | April 17, 2019 |
| TGF-b inhibitor | NCT02160106 | First in Human Dose Escalation Study of Vactosertib (TEW-7197) in Subjects With Advanced Stage Solid                   | Completed  | Advanced Stage Solid Tumors                                                                                                                                                                                                                                                                                                                                                                                                                                                                                                                                                                                                                                                                                                                                                                                                                                                                                                                                                                                                                           | Drug: TEW-7197                                                                                                                                                                           | Maximum tolerated dose (MTD) based on the number of subjects experiencing at least 1 DLT Dose-dependency of toxicity based on: dose limiting toxicities; frequency, type, grade, and seriousness, and causality of treatment-emergent adverse events, and laboratory                                                                                                                                                                                                                                                                                                                                                                                                                                                                                                                                                                                                                                                                                                                                                                                                                                                                                                     | Phase 1 | 35  | 29-Jul-14  | 9-May-19       |
| TGF-b inhibitor | NCT01401062 | Fresolimumab and Radiotherapy in Metastatic Breast Cancer                                                              | Completed  | Metastatic Breast Cancer                                                                                                                                                                                                                                                                                                                                                                                                                                                                                                                                                                                                                                                                                                                                                                                                                                                                                                                                                                                                                              | Drug: Fresolimumab Radiation: Radiation Therapy                                                                                                                                          | Abscopal Response Rate                                                                                                                                                                                                                                                                                                                                                                                                                                                                                                                                                                                                                                                                                                                                                                                                                                                                                                                                                                                                                                                                                                                                                   | Phase 2 | 23  | Jul-11     | 5-Mar-19       |
| TNF             | NCT00309907 | Etanercept in Treating Young Patients With Idiopathic Pneumonia Syndrome After Undergoing a Donor Stem Cell Transplant | Completed  | Accelerated Phase Chronic Myelogenous Leukemia Blastic Phase Chronic Myelogenous Leukemia Childhood Acute Lymphoblastic Leukemia in Remission Childhood Acute Myeloid Leukemia in Remission Childhood Chronic Myelogenous Leukemia Childhood Myelodysplastic Syndromes Chronic Phase Chronic Myelogenous Leukemia de Novo Myelodysplastic Syndromes Disseminated Neuroblastoma Juvenile Myelomonocytic Leukemia Previously Treated Childhood Rhabdomyosarcoma Previously Treated Myelodysplastic Syndromes Pulmonary Complications Recurrent Childhood Acute Lymphoblastic Leukemia Recurrent Childhood Acute Myeloid Leukemia Recurrent Childhood Large Cell Lymphoma Recurrent Childhood Lymphoblastic Lymphoma Recurrent Childhood Rhabdomyosarcoma Recurrent Childhood Small Noncleaved Cell Lymphoma Recurrent Neuroblastoma Recurrent Wilms Tumor and Other Childhood Kidney Tumors Recurrent/Refractory Childhood Hodgkin Lymphoma Relapsing Chronic Myelogenous Leukemia Secondary Acute Myeloid Leukemia Secondary Myelodysplastic Syndromes | Biological: methylprednisolone etanercept Drug:                                                                                                                                          | Response of IPS (Idiopathic Pneumonia Syndrome) to Etanercept Plus Corticosteroid Therapy by Day 28. Survival Rate Estimate Percentage Pulmonary Response in Patients With IPS Treated With Etanercept + Corticosteroid Therapy Toxicity of Etanercept Plus Corticosteroid Therapy Using the Common Terminology Criteria Version 4.0 Plasma Cytokine IL6 Level C-reactive Protein Levels                                                                                                                                                                                                                                                                                                                                                                                                                                                                                                                                                                                                                                                                                                                                                                                 |         | 39  | April 2006 | 29-Sep-17      |
| TNF             | NCT00427973 | AZD2171 in Treating Patients With Locally Advanced Unresectable or Metastatic Liver Cancer                             | Terminated | Adult Primary Hepatocellular Carcinoma Advanced Adult Primary Liver Cancer Localized Unresectable Adult Primary Liver Cancer Recurrent Adult Primary Liver Cancer                                                                                                                                                                                                                                                                                                                                                                                                                                                                                                                                                                                                                                                                                                                                                                                                                                                                                     | Drug: cediranib maleate Other: laboratory biomarker analysis Procedure: computed tomography Procedure: dynamic contrast-enhanced magnetic resonance imaging Other: pharmacological study | Progression-free Survival Response Rate Overall Survival                                                                                                                                                                                                                                                                                                                                                                                                                                                                                                                                                                                                                                                                                                                                                                                                                                                                                                                                                                                                                                                                                                                 | Phase 2 | 17  | May-09     | 31-Oct-16      |
| TNF             | NCT02076633 | Intratumoral Administration of L19IL2/L19TNF                                                                           | Completed  | Malignant Melanoma, Skin                                                                                                                                                                                                                                                                                                                                                                                                                                                                                                                                                                                                                                                                                                                                                                                                                                                                                                                                                                                                                              | Drug: L19IL2+L19TNF                                                                                                                                                                      | Rate of patients with complete response (CR) of L19IL2 treated Index/Non-Index lesions at week 12. Efficacy of L19IL2/L19TNF treated Index/non treated lesions Overall survival (OS) Safety of the combination treatment with L19IL2 and L19TNF                                                                                                                                                                                                                                                                                                                                                                                                                                                                                                                                                                                                                                                                                                                                                                                                                                                                                                                          | Phase 2 | 21  | Dec-12     | 27-May-15      |
| TNF             | NCT00098943 | NGR-TNF in Treating Patients With Advanced Solid Tumors                                                                | Completed  | Colorectal Cancer Head and Neck Cancer Kidney Cancer Unspecified Adult Solid Tumor, Protocol Specific                                                                                                                                                                                                                                                                                                                                                                                                                                                                                                                                                                                                                                                                                                                                                                                                                                                                                                                                                 | Biological: CNGRC peptide-TNF alpha conjugate                                                                                                                                            | Dose-limiting toxicity and maximum tolerated dose as measured by CTC v 3.0 Clinical response as measured by RECIST criteria Mechanism of action as measured by Dynamic                                                                                                                                                                                                                                                                                                                                                                                                                                                                                                                                                                                                                                                                                                                                                                                                                                                                                                                                                                                                   | Phase 1 | 70  | Sep-04     | 24-Sep-12      |

|     |             |                                                                                                                                                                                                          |           |                                                                                                                                                                                                                 |                                                                                                                                                           |                                                                                                                                                                                                                                                                                                                                                                                                                                                                 |               |     |            |           |
|-----|-------------|----------------------------------------------------------------------------------------------------------------------------------------------------------------------------------------------------------|-----------|-----------------------------------------------------------------------------------------------------------------------------------------------------------------------------------------------------------------|-----------------------------------------------------------------------------------------------------------------------------------------------------------|-----------------------------------------------------------------------------------------------------------------------------------------------------------------------------------------------------------------------------------------------------------------------------------------------------------------------------------------------------------------------------------------------------------------------------------------------------------------|---------------|-----|------------|-----------|
| TNF | NCT00002262 | A Phase I/II Study of Intralesional Recombinant Tumor Necrosis Factor in Patients With AIDS-Related Cutaneous Kaposi's Sarcoma                                                                           | Completed | Sarcoma, Kaposi HIV Infections                                                                                                                                                                                  | Drug: Tumor Necrosis Factor                                                                                                                               |                                                                                                                                                                                                                                                                                                                                                                                                                                                                 | Phase 1       |     |            | 24-Jun-05 |
| TNF | NCT00356980 | TNF-Bound Colloidal Gold in Treating Patients With Advanced Solid Tumors                                                                                                                                 | Completed | Unspecified Adult Solid Tumor, Protocol Specific                                                                                                                                                                | Biological: colloidal gold-bound tumor necrosis factor Other: pharmacological study                                                                       | Maximum tolerated dose of TNF-bound colloidal gold (CYT-6091) Toxicity Pharmacokinetic profile of CYT-6091 Measurements of CYT-6091 in tumor biopsies Tumor biopsy histology and gene expression after treatment Immunogenicity of CYT-6091 Electron microscopy of biopsy to determine presence of colloidal gold Response of target and nontarget lesions Overall response Duration of response Duration of stable disease                                     | Phase 1       | 60  | May-06     | 15-Mar-12 |
| TNF | NCT01213732 | Phase 1 Dose-finding Study of L19TNF $\alpha$ Plus Melphalan Using Isolated Inferior Limb Perfusion (ILP) in Subjects With Intransit Stage III/IV                                                        | Completed | Patients With Intransit Stage III/IV Melanoma of Lower Extremity Distal to the Apex of the Femoral Triangle.                                                                                                    | Other: Isolated inferior limb perfusion                                                                                                                   | Safety and Tolerability Recommended dose (RD) Objective response rate Antitumor activity Pharmacokinetic Human anti-fusion protein antibody 5-hydroxyindoleacetic acid                                                                                                                                                                                                                                                                                          | Phase 1       | 19  | Oct-08     | 23-Sep-11 |
| TNF | NCT00019968 | Isolated Limb Perfusion of Melphalan With or Without Tumor Necrosis Factor in Treating Patients With Soft Tissue Sarcoma of the Arm or Leg                                                               | Completed | Stage IVB Adult Soft Tissue Sarcoma Stage IIB Adult Soft Tissue Sarcoma Stage IIC Adult Soft Tissue Sarcoma Recurrent Adult Soft Tissue Sarcoma Stage IVA Adult Soft Tissue Sarcoma Stage III Adult Soft Tissue | Drug: melphalan Drug: tumor necrosis factor                                                                                                               |                                                                                                                                                                                                                                                                                                                                                                                                                                                                 | Phase 2       |     | Aug-99     | 15-Mar-12 |
| TNF | NCT00003789 | Melphalan With or Without Tumor Necrosis Factor in Treating Patients With Locally Advanced Melanoma of the Arm or Leg                                                                                    | Completed | Recurrent Melanoma Stage III Melanoma                                                                                                                                                                           | Drug: isolated limb perfusion Drug: melphalan Biological: recombinant tumor necrosis factor family protein Other: pharmacological study Other: laboratory | CR proportion Incidence of adverse events, graded according to NCI CTC version 2.0 Local progression-free survival Overall survival                                                                                                                                                                                                                                                                                                                             | Phase 3       | 216 | Mar-99     | 16-Jul-13 |
| TNF | NCT00001296 | A Randomized Phase III Trial of Hyperthermic Isolated Limb Perfusion With Melphalan, Tumor Necrosis Factor, and Interferon-Gamma in Patients With Locally Advanced                                       | Completed | Melanoma                                                                                                                                                                                                        | Drug: melphalan Drug: tumor necrosis factor Drug: interferon-gamma Procedure: hyperthermic isolated limb perfusion                                        |                                                                                                                                                                                                                                                                                                                                                                                                                                                                 | Phase 3       | 122 | Feb-92     | 4-Mar-08  |
| TNF | NCT00436410 | Tumor Necrosis Factor in Patients Undergoing Surgery for Primary Cancer or Metastatic Cancer                                                                                                             | Completed | Adrenocortical Carcinoma Breast Cancer Colorectal Cancer Gastrointestinal Cancer Kidney Cancer Liver Cancer Melanoma (Skin) Ovarian Cancer Pancreatic Cancer Sarcoma                                            | Biological: colloidal gold-bound tumor necrosis factor Other: electron microscopy Other: pharmacological study Procedure: conventional surgery            | Tumor tissue and normal tissue distribution of colloidal gold-bound tumor necrosis factor Comparison of the impact of distribution time and histology on accumulation of treatment particles in tumor vs normal tissues Acute antitumor activity of treatment Long-term toxicity of treatment as assessed by CTCAE v3.0                                                                                                                                         | Early Phase 1 | 108 | Dec-06     | 2-May-12  |
| TNF | NCT01253837 | L19TNF $\alpha$ in Patients With Advanced Solid Tumors                                                                                                                                                   | Completed | Solid Tumors Colorectal Cancer                                                                                                                                                                                  | Drug: L19TNF $\alpha$                                                                                                                                     | Phase I: Determination of the Maximum Tolerated Dose (MTD) and Recommended Dose (RD) Phase II: Investigation of the anti-cancer activity of L19TNF $\alpha$ as measured by Objective Response Rate (ORR) Investigation of serum concentrations of L19TNF $\alpha$ (pharmacokinetic properties) Investigation of the induction of human anti-fusion protein antibody (HAFA) Investigation of early signs of anti-tumor activity of L19TNF $\alpha$               | Phase 1       | 34  | Sep-07     | 23-Sep-11 |
| TNF | NCT00496535 | A Study of TNFerade™ Biologic With Concomitant Radiotherapy, Fluorouracil, and Hydroxyurea (TNF-FHX) in Patients With Head and                                                                           | Completed | Head and Neck Cancer Head and Neck Neoplasms                                                                                                                                                                    | Drug: TNFerade biologic                                                                                                                                   | locoregional control at 24 months Locoregional control at 3, 6 and 12 months, as well as tumor response rate, progression-free survival at 3, 6, 12 and 24 months, and the rate of metastases at 3, 6, 12 and 24 months will also be assessed.                                                                                                                                                                                                                  | Phase 1       |     |            | 23-Feb-12 |
| TNF | NCT00949039 | Study Comparing Isolated Pelvic Perfusion With TNF- $\alpha$ 0.3 mg and Melphalan 1.5 mg/kg Versus Standard Treatment in Patients With Non Resectable, Recurrent Gynaecologic or Digestive Pelvic Cancer | Completed | Gynaecologic or Digestive Pelvic Cancer                                                                                                                                                                         | Drug: Isolated pelvis perfusion Radiation: radiotherapy Procedure: Surgery                                                                                | Survival rate                                                                                                                                                                                                                                                                                                                                                                                                                                                   | Phase 3       | 101 | Feb-09     | 12-Mar-15 |
| TNF | NCT00496236 | Radiotherapy, Cetuximab, and Injections of TNFerade™ Biologic for Elderly or Frail Patients With Head and Neck Cancer                                                                                    | Completed | Head and Neck Cancer Head and Neck Neoplasms                                                                                                                                                                    | Drug: TNFerade biologic                                                                                                                                   | The maximum tolerated dose established in the Phase I (dose-finding) portion of the study will be used to assess the investigational drug's ability to enhance clinical outcome. The primary endpoint being locoregional control rate at 24 months. Locoregional control at 3, 6, and 12 months, objective response rate, progression-free survival at 3,6,12, and 24 months, and the rate of distal metastases at 3,6, 12 and 24 months will also be assessed. | Phase 1       |     |            | 23-Feb-12 |
| TNF | NCT00060502 | A Study of the Safety and Effectiveness of Infliximab (Remicade) in Patients With                                                                                                                        | Completed | Cachexia Pancreatic Neoplasms                                                                                                                                                                                   | Drug: Infliximab; Gemcitabine                                                                                                                             | Change in Lean Body Mass (LBM) from baseline to the end of first cycle, as measured by bioelectrical impedance analysis (BIA). Change in 6-minute walk test distance from baseline to the end of the first cycle; Safety, Karnofsky performance status; Survival.                                                                                                                                                                                               | Phase 2       | 73  | April 2003 | 17-May-11 |
| TNF | NCT01383733 | A Study of RO5458640 in Patients With Advanced Solid Tumors                                                                                                                                              | Completed | Neoplasms                                                                                                                                                                                                       | Drug: RO5458640                                                                                                                                           | Safety: Incidence of adverse events Dose Limiting Toxicity (DLT) according to CTEP Common Terminology Criteria for Adverse Events Version 4.0 Maximum Tolerated Dose (MTD) Pharmacokinetics: area under the concentration - time curve (AUC) on two administration schedules Tumor response according to RECIST criteria Antigenicity: Human anti-human antibody [HAHA] profile                                                                                 | Phase 1       | 54  | Jul-11     | 2-Nov-16  |

|                |             |                                                                                                                                                          |           |                                                                                             |                                                                                                               |                                                                                                                                                                                                                                                                                                                                                                                                                                                                                                                                                                                                                                                                                                                                                                                                                                                                                                                                                                    |                 |     |        |           |
|----------------|-------------|----------------------------------------------------------------------------------------------------------------------------------------------------------|-----------|---------------------------------------------------------------------------------------------|---------------------------------------------------------------------------------------------------------------|--------------------------------------------------------------------------------------------------------------------------------------------------------------------------------------------------------------------------------------------------------------------------------------------------------------------------------------------------------------------------------------------------------------------------------------------------------------------------------------------------------------------------------------------------------------------------------------------------------------------------------------------------------------------------------------------------------------------------------------------------------------------------------------------------------------------------------------------------------------------------------------------------------------------------------------------------------------------|-----------------|-----|--------|-----------|
| TNF            | NCT01239134 | Trial of TRX518 (Anti-GITR mAb) in Stage III or IV Malignant Melanoma or Other Solid Tumors                                                              | Completed | Unresectable Stage III or Stage IV Malignant Melanoma or Other Solid Tumor Malignancies     | Biological: TRX518                                                                                            | Part A: Adverse Events Part A: TRX518 peak concentration (Cmax) Part A: Time to peak concentration (Tmax) Part A: Area under the curve (AUC) Part A: Define a maximum single dose at which there are tolerable side effects and/or maximum PK/Pd parameter changes Parts B and C: Adverse Events Part A: Evaluate the effect of TRX518 on lymphoid cell subset number and function Part A: Assess TRX518 immunogenicity Part A: Evaluate the effect of TRX518 on long-term safety measuring vital signs, tumor status, adverse events Parts B & C: TRX518 peak concentration (Cmax) Parts B & C: Time to peak concentration (Tmax) Parts B & C: Area under the curve (AUC) Parts B & C: Evaluate multi-dose TRX18 monotherapy for any evidence of antitumor activity (objective response rate, [ORR] progression free survival [PFS], duration of response and overall survival [OS]; RECIST v1.1 will be utilized) Parts B & C: Evaluate the effect of multi-dose | Phase 1         | 10  | Oct-10 | 14-Aug-19 |
| TNF            | NCT02380443 | AlloStim® Immunotherapy Dosing Alone or in Combination With Cryoablation in Metastatic Colorectal Cancer                                                 | Completed | Colorectal Cancer Metastatic                                                                | Biological: AlloStim Procedure: Cryoablation                                                                  | To determine the safety of increased frequency of dosing (Part 1) (whether a Dose Limiting Toxicity (DLT) has occurred) To evaluate the anti-tumor effect of AlloStim combined with cryoablation at the new proposed dose and frequency schedule (Part 2) To assess change from baseline in Health-Related Quality of Life (HRQoL)                                                                                                                                                                                                                                                                                                                                                                                                                                                                                                                                                                                                                                 | Phase 2         | 12  | Sep-16 | 22-Jan-20 |
| TNF            | NCT00508625 | A Study of AMG 951 [rhApo2L/TRAIL] in Subjects With Previously Untreated Non-Small Cell Lung Cancer (NSCLC) Treated With                                 | Completed | Non-Small Cell Lung Cancer                                                                  | Drug: AMG 951 (rhApo2L/TRAIL) Drug: Bevacizumab Drug: Carboplatin Drug: Paclitaxel                            | Objective response rate (CR and PR) by modified RECIST Progression free survival Time to response Duration of response Time to progression Overall response rate (complete, partial or stable response) Overall Survival                                                                                                                                                                                                                                                                                                                                                                                                                                                                                                                                                                                                                                                                                                                                           | Phase 2         | 213 | Jun-06 | 14-Jun-16 |
| VEGF inhibitor | NCT00109239 | A Study of rhuMab VEGF (Bevacizumab) in Combination With Chemotherapy in Patients With Previously Treated Breast Cancer                                  | Completed | Breast Cancer                                                                               | Drug: rhuMab VEGF (Bevacizumab)                                                                               |                                                                                                                                                                                                                                                                                                                                                                                                                                                                                                                                                                                                                                                                                                                                                                                                                                                                                                                                                                    | Phase 3         |     | Nov-00 | 18-Jun-14 |
| VEGF inhibitor | NCT00113230 | Neoadjuvant Chemoradiation With RHUMAB VEGF (Avastin) for Rectal Cancer                                                                                  | Completed | Rectal Cancer                                                                               | Drug: Avastin (Bevacizumab, RHUMAB VEGF) Drug: Capecitabine Radiation: Radiation Therapy                      | Pathologic Local Tumor Response                                                                                                                                                                                                                                                                                                                                                                                                                                                                                                                                                                                                                                                                                                                                                                                                                                                                                                                                    | Phase 2         | 25  | 5-Feb  | 7-Aug-12  |
| VEGF inhibitor | NCT00396591 | AVE0005 (VEGF Trap) in Patients With Recurrent Symptomatic Malignant Ascites                                                                             | Completed | Ovarian Neoplasms                                                                           | Drug: Aflibercept (ziv-aflibercept, AVE0005, VEGF trap, ZALTRAP®)                                             | Percentage of Participants With a Repeat Paracentesis Response (RPR) Time to Repeat Paracentesis (TRP) 60-day Frequency of Paracentesis (FOP) Progression-free Survival (PFS) Time Overall Survival (OS) Time Number of Participants With a Positive Anti-drug Antibody Response Safety - Number of Participants With Adverse Events (AE)                                                                                                                                                                                                                                                                                                                                                                                                                                                                                                                                                                                                                          | Phase 2         | 16  | 6-Oct  | 10-Jan-13 |
| VEGF inhibitor | NCT00436501 | VEGF Trap and Docetaxel in Treating Patients With Persistent or Recurrent Ovarian Epithelial Cancer, Primary Peritoneal Cancer, or Fallopian Tube Cancer | Completed | Fallopian Tube Cancer Malignant Tumor of Peritoneum Recurrent Ovarian Epithelial Cancer     | Drug: docetaxel Biological: ziv-aflibercept Other: laboratory biomarker analysis Other: pharmacological study | Maximum Tolerated Dose of VEGF Trap (Phase I) Number of Participants With Clinical Response (Partial Response or Complete Response) According to the Response Evaluation Criteria in Solid Tumors (RECIST) Median Overall Survival (OS) (Phase II) Overall Objective Response Rate According to RECIST (Phase II) Median Progression-Free Survival (PFS) (Phase II) Overall Median Duration of Response (Phase II) Number of Participants With Treatment-related Adverse Effects as Assessed by NCI CTCAE v3.0                                                                                                                                                                                                                                                                                                                                                                                                                                                     | Phase 1 Phase 2 | 58  | 7-Jan  | 26-Feb-19 |
| VEGF inhibitor | NCT00991978 | VEGF Early Imaging for Breast Cancer                                                                                                                     | Completed | Breast Cancer                                                                               | Other: 89Zr-bevacizumab PET                                                                                   | SUV in tumour and lymph nodes                                                                                                                                                                                                                                                                                                                                                                                                                                                                                                                                                                                                                                                                                                                                                                                                                                                                                                                                      | Early Phase 1   | 23  | 10-Mar | 30-Mar-12 |
| VEGF inhibitor | NCT00369655 | VEGF Trap in Treating Patients With Metastatic Breast Cancer                                                                                             | Completed | Metastatic Breast Cancer Recurrent Breast Cancer Stage IV Breast Cancer                     | Biological: ziv-aflibercept                                                                                   | Proportion of Patients With Confirmed Tumor Response Proportion of Patients Receiving Vascular Endothelial Growth Factor (VEGF) Trap With 6-month Progression-free Survival Progression Free Survival Overall Survival Median Duration of Response Number of Participant With Previous Treatment of Anti-HER2 With Cardiac Events                                                                                                                                                                                                                                                                                                                                                                                                                                                                                                                                                                                                                                  | Phase 2         | 21  | 7-Jan  | 5-May-14  |
| VEGF inhibitor | NCT00047710 | Study of Combined RHUMAB VEGF and Capecitabine-based Chemoradiation for Patients With Locally Advanced Pancreatic Cancer                                 | Completed | Pancreatic Cancer                                                                           | Drug: Bevacizumab Drug: Capecitabine Radiation: Radiotherapy                                                  | Safety of combination Radiation, Bevacizumab, and Capecitabine. To evaluate the local tumor response and median survival in patients treated with the above regimen. To evaluate VEGF serum levels before and after anti-VEGF therapy. To evaluate tumor hypoxia via PET scanning (gallium PET with the novel hypoxia tracer Ga-68 ECMM) before, during, and after therapy. To evaluate quality of life in patients receiving this therapy.                                                                                                                                                                                                                                                                                                                                                                                                                                                                                                                        | Phase 1         | 48  | 2-Sep  | 1-Aug-12  |
| VEGF inhibitor | NCT00407654 | VEGF Trap in Treating Patients With Previously Treated Metastatic Colorectal Cancer                                                                      | Completed | Recurrent Colon Cancer Recurrent Rectal Cancer Stage IV Colon Cancer Stage IV Rectal Cancer | Drug: aflibercept                                                                                             | Objective Tumor Response (Defined as Partial or Complete Response as Defined by the RECIST Criteria) Progression-free Survival (Bevacizumab-naïve Group) Progression-free Survival (Bevacizumab-treated Group) Overall Survival (Bevacizumab-naïve Group) Overall Survival (Prior Bevacizumab Treated Group) Time to Progression Objective Stable Disease Rate Number of Participants With Response (Bevacizumab-naïve Group) Overall Survival (Bevacizumab-treated Group) Number of                                                                                                                                                                                                                                                                                                                                                                                                                                                                               | Phase 2         | 75  | 6-Oct  | 24-Aug-18 |
| VEGF inhibitor | NCT01508572 | VEGF-targeted Fluorescent Tracer Imaging in Breast Cancer                                                                                                | Completed | Breast Cancer                                                                               | Drug: bevacizumab-IRDye800CW                                                                                  | The uptake of bevacizumab-IRDye800CW in breast cancer tissue, surrounding tissue and lymph nodes in surgical specimens by fluorescence microscopy and macroscopy Occurrence of adverse events as a measure of safety and tolerability of bevacizumab-IRDye800CW Detection ability of preoperative optical fluorescence imaging techniques (FDOT; Fluorescence diffuse optical tomography and MSOT; multispectral opto-acoustic imaging) of the fluorescent signal from bevacizumab-IRDye800CW Detection ability of the intra-operative multispectral fluorescence reflectance imaging (MFRI) of the fluorescent signal from bevacizumab-IRDye 800CW during surgery Detection ability of all optical imaging techniques (FDOT, MSOT, MFRI) of the                                                                                                                                                                                                                   | Phase 1         | 20  | 11-Oct | 27-Oct-17 |



|                |             |                                                                                                                                      |           |                                                            |                                                                                              |                                                                                                                                                                                                                                                                                                                                                                                                                                                                                                                                                                                                                                                                                                                                     |                 |    |          |           |
|----------------|-------------|--------------------------------------------------------------------------------------------------------------------------------------|-----------|------------------------------------------------------------|----------------------------------------------------------------------------------------------|-------------------------------------------------------------------------------------------------------------------------------------------------------------------------------------------------------------------------------------------------------------------------------------------------------------------------------------------------------------------------------------------------------------------------------------------------------------------------------------------------------------------------------------------------------------------------------------------------------------------------------------------------------------------------------------------------------------------------------------|-----------------|----|----------|-----------|
| VEGF inhibitor | NCT00327444 | Study of the Effect of Intravenous AVE0005 (VEGF Trap) in Advanced Ovarian Cancer Patients With Recurrent Symptomatic Malignant      | Completed | Ovarian Neoplasms Ascites                                  | Drug: aflibercept (ziv-aflibercept, AVE0005, VEGF trap, ZALTRAP <sup>®</sup> ) Drug: Placebo | Time to Repeat Paracentesis (TRP) Area Under the Curve (AUC) for Participant Assessed Ascites Impact Measure (AIM) 60-Day Frequency of Paracentesis (FOP) Plasma Levels of Free and VEGF-bound Aflibercept                                                                                                                                                                                                                                                                                                                                                                                                                                                                                                                          | Phase 2 Phase 3 | 58 | 6-Jul    | 1-Jan-13  |
| VEGF inhibitor | NCT00393497 | A Pilot Study of VEGF Inhibition in Patients With Lymphedema Following Breast Cancer Treatment                                       | Completed | Breast Cancer Lymphedema                                   | Drug: bevacizumab                                                                            | Arm Volume The affected and unaffected arm measured at five defined points: each hand just distal to the thumb each wrist at its narrowest point each arm 30 cm proximal to the tip of the middle finger each arm 40 cm proximal to the tip of the middle finger each arm 50 cm proximal to the tip of the middle finger (if possible before the axilla is reached.) The volume of each arm will be calculated from these measurements using the Casley Smith method <sup>29</sup> . Treatment will be considered efficacious if there is a greater than or equal to 25% decrease in excess arm volume (affected arm volume minus unaffected arm) Patients                                                                          | Phase 1         | 11 | 7-Apr    | 22-Sep-14 |
| VEGF inhibitor | NCT01158300 | PTC299 in Treating Young Patients With Refractory or Recurrent Primary Central Nervous System Tumors                                 | Completed | Brain and Central Nervous System Tumors                    | Drug: VEGF inhibitor PTC299                                                                  | Maximum-tolerated dose Adverse events Percentage of study participants with complete response or partial response to the study treatment Pharmacokinetics Change from baseline in blood angiogenic markers and cytokines at discontinuation or completion of                                                                                                                                                                                                                                                                                                                                                                                                                                                                        | Phase 1         | 28 | 10-Nov   | 4-May-15  |
| VEGF inhibitor | NCT01255137 | Phase II Study of Axitinib (AG-013736) With Evaluation of the VEGF-Pathway in Metastatic, Recurrent or Primary Unresectable          | Completed | Adrenal Cortex Neoplasms                                   | Drug: Axitinib                                                                               | Response Rate (RR) of Axitinib Administered Daily, in Patients With Recurrent, Metastatic, or Primary Unresectable Adrenocortical Cancer (ACC) Number of Participants With Adverse Events                                                                                                                                                                                                                                                                                                                                                                                                                                                                                                                                           | Phase 2         | 13 | 10-Sep   | 27-Jun-13 |
| VEGF inhibitor | NCT00524849 | Zometa and Circulating Vascular Endothelial Growth Factor (VEGF) in Breast Cancer Patients With Bone Metastasis                      | Completed | Metastatic Breast Cancer Bone Metastases                   | Biological: Zoledronic acid Drug: Zoledronic acid                                            | Circulating VEGF levels in breast cancer patients with bone metastases Time to first skeletal-related event Time to bone progression disease Progression-free survival Overall survival                                                                                                                                                                                                                                                                                                                                                                                                                                                                                                                                             | Phase 2 Phase 3 | 60 | 6-Nov    | 14-Sep-10 |
| VEGF inhibitor | NCT00095706 | Treatment of HER2-Positive Metastatic Breast Cancer With Herceptin and Bevacizumab (Antibodies Against HER2 and VEGF)                | Completed | Breast Cancer                                              | Drug: Bevacizumab (drug), Herceptin (drug)                                                   | To establish the maximum tolerated dose (MTD) or recommended phase II dose of rhuMab VEGF (bevacizumab) administered intravenously every 14 days to patients with HER2-amplified relapsed or metastatic breast cancer receiving concomitant Herceptin therapy To evaluate the clinical safety and toxicities of rhuMab VEGF when administered in combination with Herceptin To characterize the pharmacokinetics of rhuMab VEGF and Herceptin given in combination To evaluate the efficacy of rhuMab VEGF plus Herceptin in terms of clinical activity when administered as an intravenous infusion, in patients with                                                                                                              | Phase 1 Phase 2 | 50 | 3-Jun    | 25-Sep-15 |
| VEGF inhibitor | NCT00082823 | Intravenous VEGF Trap in Treating Patients With Relapsed or Refractory Advanced Solid Tumors or Non-Hodgkin's Lymphoma               | Completed | Cancer                                                     | Biological: ziv-aflibercept                                                                  |                                                                                                                                                                                                                                                                                                                                                                                                                                                                                                                                                                                                                                                                                                                                     | Phase 1         | 25 | 4-Jan    | 3-Jun-16  |
| VEGF inhibitor | NCT02164838 | VEGF Receptor Tyrosine Kinase Inhibitor Axitinib in Children With Recurrent or Refractory Solid Tumors                               | Completed | Refractory or Recurrent Solid Tumors, Excluding CNS Tumors | Drug: Axitinib                                                                               | Adverse events as assessed by (CTCAE) version 4.0 MTD of axitinib based on dose-limiting toxicity (DLT) at which fewer than one-third of patients experience DLT, as assessed by CTCAE version 4.0 Pharmacokinetic Assessment of Axitinib Concentrations in Plasma Samples Evaluation of disease response to preliminarily define the antitumor activity of axitinib Biomarkers of kidney injury during axitinib treatment                                                                                                                                                                                                                                                                                                          | Phase 1         | 51 | 14-Sep   | 29-Jan-18 |
| VEGF inhibitor | NCT00083213 | Intravenous VEGF Trap in Treating Patients With Relapsed or Refractory Advanced Solid Tumors or Non-Hodgkin's Lymphoma               | Completed | Cancer                                                     | Biological: ziv-aflibercept                                                                  |                                                                                                                                                                                                                                                                                                                                                                                                                                                                                                                                                                                                                                                                                                                                     | Phase 1         | 25 | 4-Jan    | 3-Jun-16  |
| VEGF inhibitor | NCT00043823 | Avastin and Tarceva for Locally Advanced or Metastatic Non-Squamous Non-Small-Cell Lung                                              | Completed | Lung Cancer                                                | Drug: Avastin Drug: Tarceva                                                                  | Maximum Tolerated Dose (MTD) of Tarceva in combination with Avastin Response in Patients With NSCLC Receiving Combination Avastin and Tarceva                                                                                                                                                                                                                                                                                                                                                                                                                                                                                                                                                                                       | Phase 1 Phase 2 | 41 | 1-Aug-02 | 7-Nov-18  |
| VEGF inhibitor | NCT00284141 | Study of AVE0005 (VEGF Trap) in Locally Advanced or Metastatic Platinum- and Erlotinib- Resistant Non-small-cell-lung Adenocarcinoma | Completed | Pulmonary Diseases Neoplasms, Lung                         | Drug: Aflibercept (ziv-aflibercept, AVE0005, VEGF trap, ZALTRAP <sup>®</sup> )               | Confirmed Objective Response (OR) Based Upon Modified Response Evaluation Criteria in Solid Tumors (RECIST) Assessed by the Independent Review Committee (IRC). Confirmed Objective Response Based Upon Modified Response Evaluation Criteria in Solid Tumors (RECIST) Assessed by the Investigator. Duration of Response (DR) Progression-free Survival (PFS) Time Assessed by the Independent Review Committee (IRC) Progression-free Survival (PFS) Time Assessed by the Investigator Overall Survival (OS) Health-related Quality of Life (QOL) Measured Via the Lung Cancer Subscale Overall Safety - Number of Participants With Adverse Events Number of Participants With Laboratory Abnormalities Peak of Free Aflibercept | Phase 2         | 98 | 6-Jan    | 10-Dec-12 |
| VEGF inhibitor | NCT00047762 | Safety, Efficacy, and Pharmacokinetics Study of Tarceva to Treat Advanced Colorectal Cancer                                          | Completed | Colorectal Cancer                                          | Drug: Erlotinib (aka Tarceva or OSI-774) Drug: Bevacizumab (aka Avastin or Rhu MAb VEGF)     |                                                                                                                                                                                                                                                                                                                                                                                                                                                                                                                                                                                                                                                                                                                                     | Phase 1         |    | 2-Oct    | 24-Jun-05 |
| VEGF inhibitor | NCT00879359 | Trial of Vascular Endothelial Growth Factor (VEGF), Bevacizumab, in Combination With Cytotoxic Chemotherapy for Endometrial Cancer   | Completed | Endometrial Carcinoma                                      | Drug: carboplatin, paclitaxel, and bevacizumab                                               | Number of Participants With Progression Free Survival (PFS=Date of Progression of Disease or Death) at 6 Months Using Bevacizumab, Carboplatin, and Paclitaxel in Patients With Measurable Disease for Advanced/Recurrent Endometrial Cancer Median Progression Free Survival of This Treatment Regimen in Patients With Advanced/Recurrent Endometrial Cancer Number of Participants With Adverse Events                                                                                                                                                                                                                                                                                                                           | Phase 2         | 15 | 7-Dec    | 26-Apr-17 |
| VEGF inhibitor | NCT01972373 | Visualization of Rectal Cancer During Endoscopy, Using a Fluorescent Tracer                                                          | Completed | Rectal Cancer                                              | Drug: Bevacizumab-IRDye800CW Device: NIR fluorescence endoscopy                              | Sensitivity of the marker bevacizumab-IRDye800CW Correlation between bevacizumab-IRDye800CW uptake and pathological response (pCR) In vivo quantification of the NIR fluorescent signal of bevacizumab-IRDye800CW using the NIR fluorescence endoscopy vs. ex vivo VEGF levels in biopsies To Perform correlate pathways analyses using RNA/DNA/protein analyses to NIR fluorescence data The ability of optoacoustic endoscopy to detect bevacizumab-IRDye800CW in deeper areas of the tumor Collection                                                                                                                                                                                                                            | Phase 1         | 30 | 13-Oct   | 27-Nov-17 |

|                |             |                                                                                                                                   |           |                                                           |                                                                                                                                                                                                                                                     |                                                                                                                                                                                                                                                                                                                                                                                                                                                                                                                                                                                                                |                |      |           |           |
|----------------|-------------|-----------------------------------------------------------------------------------------------------------------------------------|-----------|-----------------------------------------------------------|-----------------------------------------------------------------------------------------------------------------------------------------------------------------------------------------------------------------------------------------------------|----------------------------------------------------------------------------------------------------------------------------------------------------------------------------------------------------------------------------------------------------------------------------------------------------------------------------------------------------------------------------------------------------------------------------------------------------------------------------------------------------------------------------------------------------------------------------------------------------------------|----------------|------|-----------|-----------|
| VEGF inhibitor | NCT00622414 | Afibercept in Treating Young Patients With Relapsed or Refractory                                                                 | Completed | Unspecified Childhood Solid Tumor, Protocol Specific      | Biological: ziv-afibercept                                                                                                                                                                                                                          | Maximum tolerated dose, defined as the maximum dose at which fewer than one-third of patients experience DLT during the initial 2 courses of therapy, graded according to NCI                                                                                                                                                                                                                                                                                                                                                                                                                                  | Phase 1        | 27   | 8-Apr     | 24-Feb-14 |
| VEGF inhibitor | NCT00016549 | Bevacizumab to Treat Inflammatory Breast Cancer or Locally Advanced Breast Cancer                                                 | Completed | Breast Cancer                                             | Biological: Bevacizumab                                                                                                                                                                                                                             | To determine in IBC or LABC whether a change in any of the 4 angiogenesis parameters, 3 primary molecular parameters or the dynamic MRI parameter can be detected from baseline to 3 wks after treatment with bevacizumab. To attempt to correlate each of the four primary parameters with clinical findings and time to progression/recurrence.                                                                                                                                                                                                                                                              | Phase 2        | 21   | 13-May-01 | 2-Jul-17  |
| VEGF inhibitor | NCT00462826 | VEGF Trap in Treating Patients With Recurrent or Persistent Endometrial Cancer                                                    | Completed | Recurrent Endometrial Carcinoma                           | Biological: ziv-afibercept                                                                                                                                                                                                                          | 6 Month Progression-free Survival Objective Tumor Response (RECIST 1.0) Number of Participants With Incidence of Adverse Events at Least Possibly Related to Study Agent as Assessed by Common Terminology Criteria for Adverse Events Version 3.0 Duration of Progression-free Survival Duration of Overall Survival                                                                                                                                                                                                                                                                                          | Phase 2        | 49   | 7-Nov     | 23-Jul-19 |
| VEGF inhibitor | NCT00479076 | A Phase I Study of Intravenous Afibercept in Combination With S-1 in Japanese Cancer Patients                                     | Completed | Neoplasms                                                 | Drug: afibercept (AVE0005) Drug: S-1                                                                                                                                                                                                                | Dose-limiting toxicity (DLT) defined as grade 3 or higher National Cancer Institute - Common Terminology Criteria (NCI-CTC) toxicities safety: physical examination, laboratory safety tests, adverse events pharmacokinetic values objective response rate                                                                                                                                                                                                                                                                                                                                                    | Phase 1        | 22   | 7-Mar     | 26-Jan-11 |
| VEGF inhibitor | NCT01608009 | [18F]Fluciclatide-PET, Pazopanib and Paclitaxel in Ovarian Cancer                                                                 | Completed | Ovarian Neoplasm                                          | Drug: Pazopanib and paclitaxel                                                                                                                                                                                                                      | Assessment of change in [18F]-fluciclatide retention parameters following 1 week of pazopanib treatment The proportion of women who experience side effects from the combination of paclitaxel and pazopanib The proportion of patients responding to                                                                                                                                                                                                                                                                                                                                                          | Phase 1        | 16   | 12-Jul    | 10-Mar-17 |
| VEGF inhibitor | NCT00045266 | VEGF Trap in Treating Patients With Solid Tumors or Non-Hodgkin's                                                                 | Completed | Lymphoma Unspecified Adult Solid Tumor, Protocol Specific | Biological: ziv-afibercept                                                                                                                                                                                                                          |                                                                                                                                                                                                                                                                                                                                                                                                                                                                                                                                                                                                                | Phase 1        |      | 2-Apr     | 3-Jun-16  |
| VEGF inhibitor | NCT00036946 | VEGF Trap in Treating Patients With Relapsed or Refractory Solid Tumors or Non-Hodgkin's Lymphoma                                 | Completed | Lymphoma Unspecified Adult Solid Tumor, Protocol Specific | Biological: ziv-afibercept                                                                                                                                                                                                                          |                                                                                                                                                                                                                                                                                                                                                                                                                                                                                                                                                                                                                | Phase 1        |      | 1-Nov     | 3-Jun-16  |
| VEGF inhibitor | NCT00028990 | Paclitaxel With or Without Bevacizumab in Treating Patients With Locally Recurrent or Metastatic                                  | Completed | Breast Cancer                                             | Drug: bevacizumab Drug: Paclitaxel                                                                                                                                                                                                                  | Progression-Free Survival                                                                                                                                                                                                                                                                                                                                                                                                                                                                                                                                                                                      | Phase 3        | 722  | 1-Dec     | 9-Mar-12  |
| VEGF inhibitor | NCT01551745 | Salvage Ovarian FANG ? Vaccine + Bevacizumab                                                                                      | Completed | Stage III Ovarian Cancer Stage IV Ovarian Cancer          | Biological: Vigil ? Vaccine Drug: Bevacizumab                                                                                                                                                                                                       | Time to Progression Response Rate Number of Alive Subjects Enzyme-Linked ImmunoSorbent Spot (ELISPOT)                                                                                                                                                                                                                                                                                                                                                                                                                                                                                                          | Phase 2        | 5    | 12-Mar    | 7-Aug-19  |
| VEGF inhibitor | NCT00310089 | AZD2171 and Combination Chemotherapy in Treating Women With Locally Advanced Breast Cancer                                        | Completed | Breast Cancer                                             | Biological: filgrastim Biological: pegfilgrastim Drug: cediranib maleate Drug: cyclophosphamide Drug: docetaxel Drug: doxorubicin hydrochloride Other: laboratory biomarker analysis Procedure: conventional surgery Procedure: neoadjuvant therapy |                                                                                                                                                                                                                                                                                                                                                                                                                                                                                                                                                                                                                | Not Applicable | 33   | 6-Jan     | 20-Jun-13 |
| VEGF inhibitor | NCT00109226 | A Study to Evaluate Avastin in Combination With Chemotherapy in Patients With Metastatic Colorectal Cancer                        | Completed | Colorectal Cancer                                         | Drug: Avastin (Bevacizumab)                                                                                                                                                                                                                         |                                                                                                                                                                                                                                                                                                                                                                                                                                                                                                                                                                                                                | Phase 2        |      | Aug-00    | 8-Apr-14  |
| VEGF inhibitor | NCT00025389 | Bevacizumab, Paclitaxel, and Carboplatin Before Surgery in Treating Patients With Stage IB, Stage II, or Stage IIIA Non-Small Cel | Completed | Lung Cancer                                               | Biological: bevacizumab Drug: carboplatin Drug: paclitaxel Procedure: conventional surgery Procedure: neoadjuvant therapy                                                                                                                           | Response Rate (complete and partial responses by RECIST)                                                                                                                                                                                                                                                                                                                                                                                                                                                                                                                                                       | Phase 2        | 8    | 1-Nov     | 11-Feb-13 |
| VEGF inhibitor | NCT00312377 | ZACTIMA (an Anti-EGFR / Anti-VEGF Agent) Combined With Docetaxel Compared to Docetaxel in Non-small Cell Lung Cancer              | Completed | Non-small Cell Lung Cancer Lung Cancer                    | Drug: Docetaxel Drug: Vandetanib                                                                                                                                                                                                                    | Progression-Free Survival (PFS) in the Overall Population Progression-Free Survival (PFS) in the Female Population Overall Survival (OS) in the Overall Population Overall Survival (OS) in the Female Population Objective Response Rate (ORR) Disease Control Rate (DCR) Duration of Response (DoR) Time to Deterioration of Disease-related Symptoms (TDS) by Functional Assessment of Cancer Therapy - Lung (FACT-L) Lung Cancer Subscale (LCS) Time to Deterioration of Disease-related Symptoms (TDS) by                                                                                                 | Phase 3        | 1690 | 6-May     | 30-Sep-16 |
| VEGF inhibitor | NCT00096967 | A Study to Evaluate Avastin in Patients Treated in a Previous Genentech-Sponsored Cancer Study                                    | Completed | Breast Cancer Colorectal Cancer Metastases                | Drug: Avastin (bevacizumab)                                                                                                                                                                                                                         |                                                                                                                                                                                                                                                                                                                                                                                                                                                                                                                                                                                                                | Phase 3        | 100  | 2-Oct     | 26-Mar-14 |
| VEGF inhibitor | NCT00222729 | Study of Pemetrexed and Bevacizumab in Patients With Head                                                                         | Completed | Cancer                                                    | Drug: Pemetrexed Drug: Bevacizumab                                                                                                                                                                                                                  | Time-to-progression (TTP) Objective Response Rate (ORR) Disease Control Rate (DCR) Overall Survival (OS)                                                                                                                                                                                                                                                                                                                                                                                                                                                                                                       | Phase 2        | 42   | 5-Nov     | 15-Feb-16 |
| VEGF inhibitor | NCT00006786 | Combination Chemotherapy Plus Bevacizumab in Treating Patients With Advanced Colorectal Cancer                                    | Completed | Colorectal Cancer                                         | Biological: bevacizumab Drug: fluorouracil Drug: irinotecan hydrochloride Drug: leucovorin calcium                                                                                                                                                  |                                                                                                                                                                                                                                                                                                                                                                                                                                                                                                                                                                                                                | Phase 2        |      | Nov-00    | 24-Jun-13 |
| VEGF inhibitor | NCT01159171 | A Study of Avastin (Bevacizumab) and Oxaliplatin Plus Xeloda (Capecitabine) in Patients With Advanced Colorectal Cancer.          | Completed | Colorectal Cancer                                         | Drug: bevacizumab [Avastin] Drug: capecitabine [Xeloda] Drug: oxaliplatin                                                                                                                                                                           | Percentage of Participants With Objective Response (OR) Percentage of Participants by Best Overall Response Duration of Response - Percentage of Participants With an Event by 24 Months Duration of Response Duration of Stable Disease - Percentage of Participants With an Event by 24 Months Duration of Stable Disease Time to Treatment Failure (TTF) - Percentage of Participants With an Event by 24 Months Time to Treatment Failure Time to Progression (TTP) - Percentage of Participants With an Event by 24 Months Time to Progression Overall Survival (OS) - Percentage of Participants With an | Phase 2        | 50   | 6-Jan     | 15-Aug-14 |

|                |             |                                                                                                                                                                     |           |                                                                                                                                                                                                                                                                                                                                                      |                                                                                                                                                                       |                                                                                                                                                                                                                                                                                                                                                                                                                                                                                                                                                                                                        |                 |    |          |           |
|----------------|-------------|---------------------------------------------------------------------------------------------------------------------------------------------------------------------|-----------|------------------------------------------------------------------------------------------------------------------------------------------------------------------------------------------------------------------------------------------------------------------------------------------------------------------------------------------------------|-----------------------------------------------------------------------------------------------------------------------------------------------------------------------|--------------------------------------------------------------------------------------------------------------------------------------------------------------------------------------------------------------------------------------------------------------------------------------------------------------------------------------------------------------------------------------------------------------------------------------------------------------------------------------------------------------------------------------------------------------------------------------------------------|-----------------|----|----------|-----------|
| VEGF inhibitor | NCT01832259 | A Study of VEGF Tyrosine Kinase Inhibitor (Pazopanib) in Men With High-Risk Prostate Cancer Followed by Radical Prostatectomy and Pelvic Lymph Node Dissection      | Completed | Adenocarcinoma of the Prostate                                                                                                                                                                                                                                                                                                                       | Drug: Pazopanib Other: Placebo                                                                                                                                        | Number of Vascular Endothelial Growth Factor Receptor 1 (VEGFR1)-Positive Clusters Participants Experiencing Adverse Events Biochemical Recurrence Progression Free Survival Rate                                                                                                                                                                                                                                                                                                                                                                                                                      | Phase 2         | 30 | 13-Aug   | 12-Dec-18 |
| VEGF inhibitor | NCT00066846 | Bevacizumab Plus Fluorouracil and Leucovorin in Treating Patients With Locally Advanced or Metastatic Stage IV Colorectal Cancer That Has Progressed After Standard | Completed | Colorectal Cancer                                                                                                                                                                                                                                                                                                                                    | Biological: bevacizumab Drug: fluorouracil Drug: leucovorin calcium                                                                                                   |                                                                                                                                                                                                                                                                                                                                                                                                                                                                                                                                                                                                        | Phase 2         |    | 3-Aug    | 20-Jun-13 |
| VEGF inhibitor | NCT00185588 | Phase 1-2 Vatalanib and Gemcitabine in Advanced Pancreatic                                                                                                          | Completed | Pancreatic Cancer                                                                                                                                                                                                                                                                                                                                    | Drug: Vatalanib Drug: Gemcitabine                                                                                                                                     | Time-to-Treatment Failure (Intent-To-Treat Analysis) Time-to-Progression, Evaluable Patients                                                                                                                                                                                                                                                                                                                                                                                                                                                                                                           | Phase 1 Phase   | 33 | 4-Oct    | 15-Sep-14 |
| VEGF inhibitor | NCT00729157 | Aflibercept in Treating Patients With Recurrent and/or Metastatic Thyroid Cancer That Did Not Respond to Radioactive Iodine Therapy                                 | Completed | Recurrent Thyroid Gland Carcinoma Stage III Thyroid Gland Follicular Carcinoma Stage III Thyroid Gland Papillary Carcinoma Stage IV Thyroid Gland Follicular Carcinoma Stage IV Thyroid Gland Papillary Carcinoma                                                                                                                                    | Radiation: Fludeoxyglucose F-18 Other: Laboratory Biomarker Analysis Other: Pharmacological Study Procedure: Positron Emission Tomography Biological: Ziv-Aflibercept | Progression-free Survival to Determine the 6-month Progression-free-survival (PFS) Rate Radiographic Response Rate of Aflibercept in Patients With Recurrent and/or Metastatic Thyroid Cancer That Did Not Respond to Radioactive Iodine Therapy The Safety and Toxicity Profile of IV VEGF Trap in Patients With Recurrent and/or Metastatic TC-FCO To Determine the Biologic Effect of IV VEGF Trap on FDG Avidity After Four Cycles (Approximately 8 Weeks) of Therapy Through Pre- and Post-treatment FDG-PET Scans in Patients With Recurrent and/or Metastatic D-TC-FCO  Effect of Thyroglobulin | Phase 2         | 41 | 8-Aug    | 15-Mar-17 |
| VEGF inhibitor | NCT00530907 | Valproic Acid and Bevacizumab in Patients With Advanced Cancer                                                                                                      | Completed | Advanced Cancer                                                                                                                                                                                                                                                                                                                                      | Drug: Valproic Acid Drug: Bevacizumab                                                                                                                                 | Highest tolerable dose of bevacizumab in combination with valproic acid                                                                                                                                                                                                                                                                                                                                                                                                                                                                                                                                | Phase 1         | 71 | 7-Jun    | 8-Jan-15  |
| VEGF inhibitor | NCT00498966 | Ph II Study of Perifosine for Patients With Carcinoma of the Kidney                                                                                                 | Completed | Kidney Cancer                                                                                                                                                                                                                                                                                                                                        | Drug: Perifosine                                                                                                                                                      | Objective tumor response using RESIST OR progression-free survival Evaluate the safety of perifosine in patients with metastatic carcinoma of the kidney                                                                                                                                                                                                                                                                                                                                                                                                                                               | Phase 2         | 50 | 7-Jul    | 5-Feb-18  |
| VEGF inhibitor | NCT00357760 | Ziv-Aflibercept in Treating Patients With Metastatic or Unresectable Kidney Cancer                                                                                  | Completed | Metastatic Renal Cell Carcinoma                                                                                                                                                                                                                                                                                                                      | Biological: VEGF Trap                                                                                                                                                 | Proportion of Patients Alive and Progression-free at 8 Weeks Proportion of Patients With Objective Response Progression-free Survival (PFS) Among Patients Who Undergo Dose Escalation Following Progression on Lower-dose VEGF Trap                                                                                                                                                                                                                                                                                                                                                                   | Phase 2         | 94 | 7-Dec    | 23-Jun-17 |
| VEGF inhibitor | NCT02857920 | Combination of Bevacizumab and NK Immunotherapy for Recurrent Solid Tumors                                                                                          | Completed | Malignant Solid Tumour                                                                                                                                                                                                                                                                                                                               | Drug: Bevacizumab Biological: NK immunotherapy                                                                                                                        | Relief degree of tumors Progress free survival 放疗FS 放疗Overall survival 放疗S 放疗?, Fuda Cancer Hospital                                                                                                                                                                                                                                                                                                                                                                                                                                                                                                   | Phase 1 Phase 2 | 30 | 1-Aug-16 | 12-Sep-19 |
| VEGF inhibitor | NCT00076011 | Anti-angiogenesis Agent AG-013736 in Patients With Metastatic Renal Cell Carcinoma                                                                                  | Completed | Kidney Neoplasms                                                                                                                                                                                                                                                                                                                                     | Drug: Vascular Endothelial Growth Factor Receptor [VEGFR] and Platelet-Derived Growth Factor Receptor [PDGFR] inhibitor                                               | Percentage of Participants With Objective Response (OR) Time to Disease Progression (TTP) Duration of Response (DR) Overall Survival (OS) Change From Baseline in European Organization for Research and Treatment of Cancer Quality of Life                                                                                                                                                                                                                                                                                                                                                           | Phase 2         | 52 | 3-Oct    | 26-Jun-12 |
| VEGF inhibitor | NCT00109070 | A Study to Evaluate Avastin in Combination With Standard Chemotherapy to Treat Colorectal                                                                           | Completed | Colorectal Cancer                                                                                                                                                                                                                                                                                                                                    | Drug: Avastin (bevacizumab)                                                                                                                                           |                                                                                                                                                                                                                                                                                                                                                                                                                                                                                                                                                                                                        | Phase 3         |    | Sep-00   | 21-Jun-13 |
| VEGF inhibitor | NCT00022659 | Bevacizumab in Treating Patients With Persistent or Recurrent Ovarian Epithelial Cancer or Primary                                                                  | Completed | Primary Peritoneal Cavity Cancer Recurrent Ovarian Epithelial Cancer Stage IV Ovarian Epithelial Cancer                                                                                                                                                                                                                                              | Biological: bevacizumab Other: laboratory biomarker analysis                                                                                                          | Progression-free Survival at 6 Months Tumor Response Number of Participants and Degree of Toxicity of Bevacizumab in This Cohort of Patients as Assessed by CTC. Overall Survival Duration of Progression-free Survival                                                                                                                                                                                                                                                                                                                                                                                | Phase 2         | 64 | 2-Apr    | 24-Jul-19 |
| VEGF inhibitor | NCT00109057 | An Extension Study to Evaluate Avastin in Patients Treated in a Previous Genentech-Sponsored                                                                        | Completed | Cancer                                                                                                                                                                                                                                                                                                                                               | Drug: Avastin (bevacizumab)                                                                                                                                           |                                                                                                                                                                                                                                                                                                                                                                                                                                                                                                                                                                                                        | Phase 2         | 56 | Feb-98   | 21-Jun-13 |
| VEGF inhibitor | NCT00055913 | Bevacizumab and Erlotinib in Treating Patients With Recurrent or Metastatic Head and Neck Cancer                                                                    | Completed | Recurrent Squamous Cell Carcinoma of the Hypopharynx Recurrent Squamous Cell Carcinoma of the Larynx Recurrent Squamous Cell Carcinoma of the Lip and Oral Cavity Recurrent Squamous Cell Carcinoma of the Nasopharynx Recurrent Squamous Cell Carcinoma of the Oropharynx Recurrent Squamous Cell Carcinoma of the Paranasal Sinus and Nasal Cavity | Biological: bevacizumab Drug: erlotinib hydrochloride Other: laboratory biomarker analysis                                                                            | Maximum tolerated dose of bevacizumab when used in combination with erlotinib hydrochloride determined by dose-limiting toxicities (Phase I) Objective response rate (CR + PR) evaluated using Response Evaluation Criteria in Solid Tumors (RECIST) (Phase II) Progression-free survival rate (Phase II) Overall survival rate (Phase II)                                                                                                                                                                                                                                                             | Phase 1 Phase 2 | 58 | 3-Mar    | 2-Oct-18  |
| VEGF inhibitor | NCT00049322 | Chemoembolization and Bevacizumab in Treating Patients With Liver Cancer That Cannot Be Removed With Surgery                                                        | Completed | Liver Cancer                                                                                                                                                                                                                                                                                                                                         | Biological: bevacizumab                                                                                                                                               | Neovessel Formation as Measured by Angiogram at 14 Weeks Progression Free Survival Assess the Toxicities of Bevacizumab in Patients With Liver Function Impairment Assess Pharmacokinetics of Bevacizumab in Liver Disease Measure (Vascular Endothelial Growth Factor) VEGF Before and After TACE With and Without Bevacizumab                                                                                                                                                                                                                                                                        | Phase 2         | 30 | 3-Jun    | 15-Mar-16 |
| VEGF inhibitor | NCT00271505 | Avastin/Docetaxel/Carboplatin in Non-Small Cell Lung Cancer                                                                                                         | Completed | Non-Small Cell Lung Cancer                                                                                                                                                                                                                                                                                                                           | Drug: Bevacizumab (Avastin) Drug: Carboplatin Drug: Docetaxel                                                                                                         | Progression-Free Survival (PFS)                                                                                                                                                                                                                                                                                                                                                                                                                                                                                                                                                                        | Phase 2         | 43 | 5-Dec-05 | 3-Aug-17  |

|                |             |                                                                                                                                    |           |                                                        |                                                                                                                                                      |                                                                                                                                                                                                                                                                                                                                                                                                                                                                                                                                                                                                                                                                                                                                                                                           |         |     |           |           |
|----------------|-------------|------------------------------------------------------------------------------------------------------------------------------------|-----------|--------------------------------------------------------|------------------------------------------------------------------------------------------------------------------------------------------------------|-------------------------------------------------------------------------------------------------------------------------------------------------------------------------------------------------------------------------------------------------------------------------------------------------------------------------------------------------------------------------------------------------------------------------------------------------------------------------------------------------------------------------------------------------------------------------------------------------------------------------------------------------------------------------------------------------------------------------------------------------------------------------------------------|---------|-----|-----------|-----------|
| VEGF inhibitor | NCT01831726 | Dovitinib for Patients With Tumor Pathway Activations Inhibited by                                                                 | Completed | Tumor Pathway Activations Inhibited by Dovitinib       | Drug: Dovitinib (TKI258)                                                                                                                             | Clinical Benefit Rate (CBR) Overall Response (OR) of Partial Response (PR) or Greater Progression-Free Survival (PFS) Overall Survival (OS)                                                                                                                                                                                                                                                                                                                                                                                                                                                                                                                                                                                                                                               | Phase 2 | 80  | 13-Aug    | 20-Mar-17 |
| VEGF inhibitor | NCT00066677 | Bevacizumab With or Without Docetaxel in Treating Patients With Previously Treated Metastatic                                      | Completed | Pancreatic Cancer                                      | Biological: bevacizumab Drug: docetaxel                                                                                                              | Progression-free survival Objective response rate Overall survival Incidence of thromboembolic events                                                                                                                                                                                                                                                                                                                                                                                                                                                                                                                                                                                                                                                                                     | Phase 2 | 46  | 3-Oct     | 19-Jun-13 |
| VEGF inhibitor | NCT00019539 | Monoclonal Antibody Therapy in Treating Patients With Advanced                                                                     | Completed | Stage IV Renal Cell Cancer Recurrent Renal Cell Cancer | Drug: bevacizumab Drug: thalidomide                                                                                                                  |                                                                                                                                                                                                                                                                                                                                                                                                                                                                                                                                                                                                                                                                                                                                                                                           | Phase 2 |     | Nov-98    | 20-Jun-13 |
| VEGF inhibitor | NCT00445848 | S0636: Erlotinib and Bevacizumab in Never-Smokers With Stage IIB or Stage IV Primary Non-Small Cell                                | Completed | Lung Cancer                                            | Biological: bevacizumab Drug: erlotinib hydrochloride                                                                                                | Overall Survival Progression-free Survival Response Rate (Complete and Partial) Number of Patients With Gr 3 Through 5 Adverse Events That Are Related to Study Drugs                                                                                                                                                                                                                                                                                                                                                                                                                                                                                                                                                                                                                     | Phase 2 | 89  | 7-Jul     | 6-Nov-17  |
| VEGF inhibitor | NCT03175497 | Telatinib Safety and Pharmacokinetics Study in China Patients With Advanced Solid                                                  | Completed | Solid Tumor, Adult                                     | Drug: Telatinib Mesylate                                                                                                                             | Dose-limiting toxicity, incidence of treatment-emergent adverse events Cmax AUC                                                                                                                                                                                                                                                                                                                                                                                                                                                                                                                                                                                                                                                                                                           | Phase 1 | 15  | 25-Jul-17 | 13-May-19 |
| VEGF inhibitor | NCT00532155 | A Study of Afibercept Versus Placebo in Patients With Second-Line Docetaxel for Locally Advanced or Metastatic Non-Small-Cell Lung | Completed | Carcinoma Non Small Cell Lung                          | Drug: Afibercept (ziv-afibercept, AVE0005, VEGF trap, ZALTRAP 注射液) Drug: Placebo Drug: Docetaxel (Taxotere 注射液) Drug: Dexamethasone (pre- and post-) | Overall Survival (OS) Progression Free Survival (PFS) Overall Response (OR) Rate as Per Response Evaluation Criteria in Solid Tumours (RECIST) Criteria Health Related Quality of Life (HRQL) Assessed by the Lung Cancer Symptom Scale (LCSS) Health Related Quality of Life (HRQL) Assessed by the Average Symptom Burden Index (ASBI)                                                                                                                                                                                                                                                                                                                                                                                                                                                  | Phase 3 | 913 | 7-Sep     | 7-Jun-16  |
| VEGF inhibitor | NCT01152801 | Safety of RAD001 in Chinese Patients With Metastatic Renal Cell Cancer                                                             | Completed | Metastatic Renal Cell Carcinoma                        | Drug: Everolimus (RAD001)                                                                                                                            | To evaluate the safety and tolerability profile of RAD001 (10mg daily dose) in Chinese patients who are intolerant of or have progressed on or after VEGF-targeted therapy. Disease control rate (DCR), best overall response rate and progression-free survival (PFS) Overall survival (OS) Systemic pre-dose exposure levels of RAD001 in                                                                                                                                                                                                                                                                                                                                                                                                                                               | Phase 1 | 64  | 10-May    | 24-Jun-14 |
| VEGF inhibitor | NCT00301964 | Bevacizumab in Treating Patients With Recurrent or Persistent Endometrial Cancer                                                   | Completed | Recurrent Endometrial Carcinoma                        | Biological: bevacizumab Other: laboratory biomarker analysis                                                                                         | Progression-free Survival Greater Than 6 Months Best Tumor Response Number of Patients With Toxicity of Bevacizumab as Assessed by CTCAE v3.0 in This Cohort of Patients. Progression-free Survival Overall Survival Initial Performance Status Histologic                                                                                                                                                                                                                                                                                                                                                                                                                                                                                                                                | Phase 2 | 56  | 6-Mar     | 24-Jul-19 |
| VEGF inhibitor | NCT01676714 | Study of Dovitinib and Biomarkers in Advanced Non-Small Cell Lung Cancer or Advanced Colorectal                                    | Completed | Non-Small Cell Lung Cancer Colorectal Cancer           | Drug: Dovitinib                                                                                                                                      | Overall Response Rate Disease Control Rate Progression Free Survival Number of Patients Who Experienced Treatment Related Toxicities                                                                                                                                                                                                                                                                                                                                                                                                                                                                                                                                                                                                                                                      | Phase 2 | 10  | 13-Feb    | 10-Jan-18 |
| VEGF inhibitor | NCT00655850 | Lower Dose Chemotherapy Given More Frequent With Avastin to Treat Advanced Non-Squamous Non-Small Cell Lung Cancer                 | Completed | Non-Small Cell Lung Cancer                             | Drug: Paclitaxel Drug: Gemcitabine Biological: Avastin                                                                                               | Progression-Free Survival (PFS) Number of Participants With Adverse Events Overall Survival (OS) Objective Response Rate                                                                                                                                                                                                                                                                                                                                                                                                                                                                                                                                                                                                                                                                  | Phase 2 | 39  | 8-Mar     | 17-Jul-17 |
| VEGF inhibitor | NCT00005061 | Monoclonal Antibody Therapy in Treating Patients With Relapsed or Refractory Solid Tumors                                          | Completed | Unspecified Adult Solid Tumor, Protocol Specific       | Biological: bevacizumab                                                                                                                              |                                                                                                                                                                                                                                                                                                                                                                                                                                                                                                                                                                                                                                                                                                                                                                                           | Phase 1 | 20  | Dec-99    | 18-Jul-12 |
| VEGF inhibitor | NCT00723255 | Bevacizumab and Temezirolimus in Treating Patients With Recurrent or Persistent Endometrial Cancer                                 | Completed | Recurrent Endometrial Carcinoma                        | Biological: bevacizumab Drug: temsirolimus                                                                                                           | Tumor Response Progression-free Survival at 6 Months Frequency and Severity of Adverse Events Assessed by Common Terminology Criteria for Adverse Events (CTCAE) Version 3.0 Progression-Free Survival Overall Survival Complete and Partial Tumor Response by RECIST 1.0 by Performance Status Progression-free Survival at 6 Months by Performance Status Complete and Partial Tumor Response by RECIST 1.0 by Histologic Type Progression-free Survival at 6 Months by Histologic Type Complete and Partial Tumor Response by RECIST 1.0 by Tumor Grade Progression-free Survival at 6                                                                                                                                                                                                 | Phase 2 | 53  | 8-Sep     | 23-Jul-19 |
| VEGF inhibitor | NCT00328497 | A Combination Study to Determine the Safety and Efficacy of Panzem NCD With Avastin in Metastatic Carcinoid Tumors                 | Completed | Carcinoid Tumor                                        | Drug: Panzem (2-methoxyestradiol) NCD, Avastin (Bevacizumab)                                                                                         | To assess the safety of Panzem NCD administered orally in combination with intravenous infusion of bevacizumab by evaluation of the frequency and severity of treatment emergent adverse events To evaluate the objective tumor response rate by radiographic means using Response Evaluation Criteria in Solid Tumors To determine the overall survival of patients with locally advanced or metastatic carcinoid tumors administered oral Panzem NCD in combination with intravenous infusion of bevacizumab To determine the progression-free survival of patients with locally advanced or metastatic carcinoid tumors administered oral Panzem NCD in combination with intravenous infusion of bevacizumab To monitor the steady-state trough plasma levels of 2ME2 following 28-day | Phase 2 | 31  | 6-May     | 10-Mar-10 |
| VEGF inhibitor | NCT00158782 | Study Of Safety And Tolerability Of GW786034 Given With Lapatinib In Cancer Patients                                               | Completed | Carcinoma, Renal Cell                                  | Drug: GW786034 Drug: lapatinib                                                                                                                       | Changes in pre and post treatment lab values and monitoring/reporting AES/AE's throughout study Labs every wk first cycle:day 1 subsequent cycles find max conc of drugs in blood and time it occurs find out if drugs are taken up by the body, how much/for how long find out if drugs affect the size of the tumor. Blood taken day 15, 22 or 37 and tumor                                                                                                                                                                                                                                                                                                                                                                                                                             | Phase 1 | 75  | 28-Sep-04 | 17-Nov-17 |
| VEGF inhibitor | NCT00545246 | A Phase I Study of Intravenous Afibercept in Combination With Docetaxel in Japanese Cancer                                         | Completed | Neoplasms                                              | Drug: afibercept (AVE0005) Drug: docetaxel                                                                                                           | Dose-limiting toxicity (DLT) defined as grade 3 or higher National Cancer Institute - Common Terminology Criteria (NCI-CTC) toxicities safety: physical examination, laboratory safety tests, adverse events pharmacokinetic values objective response rate                                                                                                                                                                                                                                                                                                                                                                                                                                                                                                                               | Phase 1 | 12  | 7-Oct     | 16-Oct-13 |
| VEGF inhibitor | NCT01152203 | Bendamustine and Bevacizumab for Advanced Cancers                                                                                  | Completed | Advanced Cancer                                        | Drug: Bendamustine Drug: Bevacizumab                                                                                                                 | Maximum Tolerated Dose (MTD) of Bendamustine and Bevacizumab                                                                                                                                                                                                                                                                                                                                                                                                                                                                                                                                                                                                                                                                                                                              | Phase 1 | 59  | 10-Jun    | 18-Nov-15 |

|                |             |                                                                                                                                                                                                              |           |                                                                                                       |                                                                                                                                                        |                                                                                                                                                                                                                                                                                                                                                                                                                                                                                                                                                                                                                                                                                                                                                                                                                                                                                                                                                                                                                                                                                                                                                                                                                                                                                                                                                                                                                                                                                                                                                                                                                                                                                                                                                                                                                                                                                                                                                                                                                                                                                                                                                                                                                                                                                                                                                                                                                                                                                                                                                  |         |      |           |           |
|----------------|-------------|--------------------------------------------------------------------------------------------------------------------------------------------------------------------------------------------------------------|-----------|-------------------------------------------------------------------------------------------------------|--------------------------------------------------------------------------------------------------------------------------------------------------------|--------------------------------------------------------------------------------------------------------------------------------------------------------------------------------------------------------------------------------------------------------------------------------------------------------------------------------------------------------------------------------------------------------------------------------------------------------------------------------------------------------------------------------------------------------------------------------------------------------------------------------------------------------------------------------------------------------------------------------------------------------------------------------------------------------------------------------------------------------------------------------------------------------------------------------------------------------------------------------------------------------------------------------------------------------------------------------------------------------------------------------------------------------------------------------------------------------------------------------------------------------------------------------------------------------------------------------------------------------------------------------------------------------------------------------------------------------------------------------------------------------------------------------------------------------------------------------------------------------------------------------------------------------------------------------------------------------------------------------------------------------------------------------------------------------------------------------------------------------------------------------------------------------------------------------------------------------------------------------------------------------------------------------------------------------------------------------------------------------------------------------------------------------------------------------------------------------------------------------------------------------------------------------------------------------------------------------------------------------------------------------------------------------------------------------------------------------------------------------------------------------------------------------------------------|---------|------|-----------|-----------|
| VEGF inhibitor | NCT00410124 | RAD001 Plus Best Supportive Care (BSC) Versus BSC Plus Placebo in Patients With Metastatic Carcinoma of the Kidney Which Has Progressed After Treatment With Sorafenib and/or Sunitinib                      | Completed | Metastatic Renal Cell Carcinoma                                                                       | Drug: RAD001 Drug: Placebo                                                                                                                             | Progressive Free Survival (PFS) in Patients Who Receive RAD001 Plus Best Supportive Care(BSC) Versus Patients Who Receive Matching Placebo Plus BSC Overall Survival (OS) Assessed by the Monthly Overall Survival Assessments Best Overall Response Rate in Patients Who Receive RAD001 Plus BSC Versus Matching Placebo Plus BSC Duration of Response in Patients Who Receive RAD001 Plus BSC Versus Placebo Plus BSC Analysis of Time to Definitive Deterioration of the Global Health Status/QoL Scale(QL) Scores of the EORTC QLQ-30 Questionnaire by at Least 10 Percent Using Kaplan Meier Method, by Treatment, Time to Definitive Deterioration of the FKS-DRS Risk Score by at Least 2 Score Units Using Kaplan-Meier Method, by Treatment, Time to Definitive Deterioration of the Physical Functioning Scale (PF) Score of the EORTC QLQ-C30 Questionnaire by at Least 10 Percent Using Kaplan Meier Method, by Treatment, Pharmacokinetics of RAD001:Peak Concentration in a Dosing Interval (C-max); Pre-dose Concentration at 24-h Time Point in Dosing Interval (C-min) and Average Concentration in a Dosing Interval =(C-avg) Pharmacokinetics of RAD001: Time at Which C-Max Occurs (t-Max) Pharmacokinetics of RAD001: Area Under Curve (AUC) in a Dosing Interval From Time-zero to Time of the Last Quantifiable Concentration. (AUC 0-tlast) Pharmacokinetics of RAD001: Time of the Last Quantifiable Concentration in a                                                                                                                                                                                                                                                                                                                                                                                                                                                                                                                                                                                                                                                                                                                                                                                                                                                                                                                                                                                                                                                                                                 | Phase 3 | 416  | 6-Nov     | 15-Jan-13 |
| VEGF inhibitor | NCT01305213 | Bevacizumab With or Without Fosbretabulin Tromethamine in Treating Patients With Recurrent or Persistent Ovarian Epithelial, Fallopian Tube, or Peritoneal Cavity                                            | Completed | Recurrent Fallopian Tube Carcinoma Recurrent Ovarian Carcinoma Recurrent Primary Peritoneal Carcinoma | Biological: Bevacizumab Drug: Fosbretabulin Tromethamine Other: Laboratory Biomarker Analysis                                                          | Assessed by Common Terminology Criteria for Adverse Events (CTCAE) v 4.0 Measurable Disease by Response Evaluation Criteria in Solid Tumors (RECIST) Criteria and Progression Free Survival (PFS) Tumor Response Overall Survival (OS) Response by CA-125                                                                                                                                                                                                                                                                                                                                                                                                                                                                                                                                                                                                                                                                                                                                                                                                                                                                                                                                                                                                                                                                                                                                                                                                                                                                                                                                                                                                                                                                                                                                                                                                                                                                                                                                                                                                                                                                                                                                                                                                                                                                                                                                                                                                                                                                                        | Phase 2 | 107  | 21-Mar-11 | 30-Jul-19 |
| VEGF inhibitor | NCT00561470 | Afibercept Versus Placebo in Combination With Irinotecan and 5-FU in the Treatment of Patients With Metastatic Colorectal Cancer After Failure of an Oxaliplatin Based Regimen                               | Completed | Colorectal Neoplasms Neoplasm Metastasis                                                              | Drug: Placebo Drug: Afibercept (ziv-aflibercept, AVE0005, VEGF trap, ZALTRAP <sup>®</sup> ) Drug: FOLFIRI (Irinotecan, 5-Fluorouracil, and Leucovorin) | Overall Survival (OS) Progression-free Survival (PFS) Assessed by Independent Review Committee (IRC) Overall Objective Response Rate (ORR) Based on the Tumor Assessment by the Independent Review Committee (IRC) as Per Response Evaluation Criteria in Solid Tumours (RECIST) Criteria Number of Participants With Adverse Events (AE) Immunogenicity Assessment: Number of Participants With Positive Sample(s) in the Anti-drug Antibodies (ADA) Assay and in the Neutralizing Anti-drug Antibodies (NAB) Assay                                                                                                                                                                                                                                                                                                                                                                                                                                                                                                                                                                                                                                                                                                                                                                                                                                                                                                                                                                                                                                                                                                                                                                                                                                                                                                                                                                                                                                                                                                                                                                                                                                                                                                                                                                                                                                                                                                                                                                                                                             | Phase 3 | 1226 | 7-Nov     | 28-Sep-12 |
| VEGF inhibitor | NCT02665416 | Study Evaluating the Safety, Pharmacokinetics (PK), Pharmacodynamics (PD), and Therapeutic Activity of Selicrelumab (RO7009789) With Vanucizumab or Bevacizumab in Participants With Metastatic Solid Tumors | Completed | Advanced/Metastatic Solid Tumors                                                                      | Drug: Selicrelumab Drug: Vanucizumab Drug: Bevacizumab                                                                                                 | Percentage of Participants with Dose-Limiting Toxicities (DLTs) MTD of Selicrelumab in Combination With Vanucizumab Recommended Phase II Dose of Selicrelumab in Combination With Vanucizumab Percentage of Participants With Adverse Events (AEs) Part II: Clinical Activity of SC Selicrelumab in Combination with Bevacizumab as Assessed by Response Evaluation in Solid Tumors, Version 1.1 (RECIST v1.1) Part II: Percentage of Participants With Best Overall Response per Response Evaluation Criteria in Solid Tumors Version 1.1 (RECIST v1.1) Criteria Part II: Duration of Objective Response per RECIST v1.1 Criteria Part II: Percentage of Participants With Disease Control per RECIST v1.1 Criteria Part II: Progression-free Survival (PFS) per RECIST v1.1 Criteria Percentage of Participants With Anti-Drug Antibodies (ADAs) to Selicrelumab Percentage of Participants with ADAs to Vanucizumab Area Under the Concentration-Time Curve From Time 0 to Last Measureable Concentration (AUClast) of Selicrelumab Following Subcutaneous (SC) Administration Area Under the Concentration-Time Curve From Time 0 to Infinity (AUCinf) of Selicrelumab Following SC Administration Maximum Concentration (Cmax) of Selicrelumab Following SC Administration Time to Maximum Concentration (Tmax) of Selicrelumab Following SC Administration Apparent Clearance (CL/F) of Selicrelumab Following SC Administration Apparent Volume of Distribution (Vd/F) of Selicrelumab Following SC Administration Apparent Terminal Half-Life (t1/2) of Selicrelumab Following SC Administration Part I: AUClast of Vanucizumab Part I: AUCinf of Vanucizumab Part I: Concentration at the End of Infusion (Cend) of Vanucizumab Part I: CL of Vanucizumab Part I: Vss of Vanucizumab Part I: t1/2 of Vanucizumab Part I: Percentage of Participants With Best Overall Response per Response Evaluation Criteria in Solid Tumors Version 1.1 (RECIST v1.1) Criteria Part I: Duration of Objective Response per RECIST v1.1 Criteria Part I: Percentage of Participants With Disease Control per RECIST v1.1 Criteria Part I: Progression-free Survival (PFS) per RECIST v1.1 Criteria Part I: Clinical Activity of SC Selicrelumab in Combination with Bevacizumab as Assessed by Response Evaluation in Solid Tumors, Version 1.1 (RECIST v1.1) Change in Blood and Tumor Tissue Immune Cell Subpopulations Change in Peripheral Blood Level of Cytokines Change in Blood Soluble Proteins Percentage of Participants With Best overall | Phase 1 | 94   | 25-Jan-16 | 22-Jan-20 |

|                |             |                                                                                                                                                                                                |           |                                                                                                                                                                                                                                                                            |                                                                                                                                                    |                                                                                                                                                                                                                                                                                                                                                                                                                                                                                                                                                                                                                                                                                                                                                                                                                                                                                                                                                                                          |         |     |           |           |
|----------------|-------------|------------------------------------------------------------------------------------------------------------------------------------------------------------------------------------------------|-----------|----------------------------------------------------------------------------------------------------------------------------------------------------------------------------------------------------------------------------------------------------------------------------|----------------------------------------------------------------------------------------------------------------------------------------------------|------------------------------------------------------------------------------------------------------------------------------------------------------------------------------------------------------------------------------------------------------------------------------------------------------------------------------------------------------------------------------------------------------------------------------------------------------------------------------------------------------------------------------------------------------------------------------------------------------------------------------------------------------------------------------------------------------------------------------------------------------------------------------------------------------------------------------------------------------------------------------------------------------------------------------------------------------------------------------------------|---------|-----|-----------|-----------|
| VEGF inhibitor | NCT03289533 | A Study Of Avelumab In Combination With Axitinib In Advanced HCC (VEGF Liver 100)                                                                                                              | Completed | Carcinoma, Hepatocellular                                                                                                                                                                                                                                                  | Drug: Avelumab (MSB0010718C) Drug: Axitinib (AG-013736)                                                                                            | Adverse events (AEs) and laboratory abnormalities as graded by National Cancer Institute (NCI) Common Terminology Criteria for Adverse Events (CTCAE) v. 4.03. Time to Progression (TTP) Overall Survival (OS) Maximum plasma concentration (Cmax) of avelumab Maximum plasma concentration (Cmax) of axitinib Tumor tissue biomarker status (ie, positive or negative based on, for example, PD-L1 expression and/or quantitation of tumor infiltrating CD8+ T lymphocytes as assessed by immunohistochemistry [IHC]). Anti drug antibodies (ADAs, neutralizing antibodies [nAbs]) for avelumab when in combination with axitinib. Progression Free Survival (PFS) Objective Response (OR) Time to Tumor Response (TTR) Duration of Response (DR) Trough                                                                                                                                                                                                                                | Phase 1 | 22  | 8-Sep-17  | 15-Nov-19 |
| VEGF inhibitor | NCT00323869 | Phase II Bevacizumab, Gemcitabine and Carboplatin in Newly Diagnosed Non-Small Cell Lung Cancer                                                                                                | Completed | Lung Cancer Non-small Cell Lung Cancer (NSCLC)                                                                                                                                                                                                                             | Drug: Bevacizumab Drug: Gemcitabine Drug: Carboplatin                                                                                              | Progression-free Survival (PFS) Response Rate (CR + PR + SD) Overall Survival (OS) Partial Response (PR) Complete Response (CR) Stable Disease (SD) Time-to-First Event Overall Survival (OS) at 12 Months Overall Survival (OS) at 24 Months                                                                                                                                                                                                                                                                                                                                                                                                                                                                                                                                                                                                                                                                                                                                            | Phase 2 | 48  | 6-Jun     | 7-Sep-16  |
| VEGF inhibitor | NCT01498952 | MEDI-573 in Combination With SOC in Unresectable or Metastatic HCC.                                                                                                                            | Completed | Unresectable or Metastatic Hepatocellular Carcinoma (HCC)                                                                                                                                                                                                                  | Drug: MEDI-573 (1 of 3 doses) Drug: Sorafenib                                                                                                      | Phase 1b: Number of Participants With Dose-limiting Toxicities (DLTs) Phase 1b: Number of Participants With Treatment Emergent Adverse Events (TEAEs) and Treatment Emergent Serious Adverse Events (SAEs) Phase 1b: Number of Participants With Clinical Laboratory Abnormalities Reported as TEAEs Phase 1b: Number of Participants With Vital Signs Abnormalities Reported as TEAEs Phase 1b: Number of Participants With Electrocardiogram (ECG) Abnormalities Reported as TEAEs Phase 2: Time to Progression Phase 1b and Phase 2: Number of Participants With Positive Anti-drug Antibodies (ADA) to MEDI-573 Phase 2: Best Overall Tumor Response Phase 2: Objective Response Rate Phase 2: Progression-free Survival (PFS) Phase 2: Change in Tumor Size Phase 1b and Phase 2: Time to Reach Maximum Observed Serum Concentration (Tmax) of MEDI-573 for Cycle 1 Phase 1b and Phase 2: Maximum Observed Serum Concentration (Cmax) of MEDI-573 for Cycle 1 Phase 1b and Phase 2: | Phase 1 | 6   | 17-Jan-12 | 19-Feb-19 |
| VEGF inhibitor | NCT00610493 | Bevacizumab and Temsirolimus in Patients With Advanced Malignancy                                                                                                                              | Completed | Advanced Cancer                                                                                                                                                                                                                                                            | Drug: Bevacizumab Drug: Temsirolimus Procedure: Additional Blood Drawn Procedure: Biopsy Procedure: DCE-MRI Scan                                   | Maximum Tolerated Dose (MTD) Anti-Tumor Efficacy                                                                                                                                                                                                                                                                                                                                                                                                                                                                                                                                                                                                                                                                                                                                                                                                                                                                                                                                         | Phase 1 | 193 | 25-Jan-08 | 8-Dec-17  |
| VEGF inhibitor | NCT00557492 | Efficacy of Neoadjuvant Chemoradiation for Potentially Resectable Pancreas Cancer                                                                                                              | Completed | Pancreatic Cancer                                                                                                                                                                                                                                                          | Drug: Avastin (bevacizumab) Drug: Gemzar (Gemcitabine) Radiation: external beam radiotherapy                                                       | Rate of Margin Negative Surgical Resection (R0 Resection Rate) Rate of Pathologic Complete Response (pCR) Overall Survival (OS) Progression-free Survival (PFS) Rate of Surgical Resection Radiographic Tumor Response Ca 19-9 Level (in Serum) - Biomarker                                                                                                                                                                                                                                                                                                                                                                                                                                                                                                                                                                                                                                                                                                                              | Phase 2 | 59  | 6-Dec     | 25-Sep-18 |
| VEGF inhibitor | NCT00428545 | Bevacizumab and Bortezomib in Patients With Advanced Malignancy                                                                                                                                | Completed | Advanced Malignancy Lymphoma Myeloma Solid Tumors                                                                                                                                                                                                                          | Drug: Bevacizumab Drug: Bortezomib                                                                                                                 | Maximum tolerated dose (MTD) and Dose-limiting toxicities (DLT) of Combination Treatment with Bevacizumab and Bortezomib                                                                                                                                                                                                                                                                                                                                                                                                                                                                                                                                                                                                                                                                                                                                                                                                                                                                 | Phase 1 | 104 | 7-Jan     | 12-Feb-13 |
| VEGF inhibitor | NCT00748657 | Bevacizumab in Treating Patients With Recurrent Sex Cord-Stromal Tumors of the Ovary                                                                                                           | Completed | Malignant Ovarian Epithelial Tumor Ovarian Granulosa Cell Tumor Ovarian Gynandroblastoma Ovarian Sertoli-Leydig Cell Tumor Ovarian Sex Cord Tumor With Annular Tubules Ovarian Sex Cord-Stromal Tumor Ovarian Sex Cord-Stromal Tumor of Mixed or                           | Biological: Bevacizumab Other: Laboratory Biomarker Analysis                                                                                       | Tumor Response Progression-free Survival Overall Survival Number of Participants With Episodes and Grade of Adverse Events as Assessed by Common Terminology for Adverse Events Version 3.0                                                                                                                                                                                                                                                                                                                                                                                                                                                                                                                                                                                                                                                                                                                                                                                              | Phase 2 | 36  | 22-Sep-08 | 23-Jul-19 |
| VEGF inhibitor | NCT00423332 | Cediranib (AZD2171, RECENTIN <sup>®</sup> ) in Metastatic or Recurrent Renal Cell Carcinoma                                                                                                    | Completed | Renal Cell Carcinoma                                                                                                                                                                                                                                                       | Drug: Cediranib Drug: Cediranib Placebo                                                                                                            | Percentage Change From Baseline in Tumour Size at 12 Weeks Best Percentage Change From Baseline in Tumour Size During the Study Duration of Response Progression Free Survival Objective Tumour Response at 12 Weeks Best                                                                                                                                                                                                                                                                                                                                                                                                                                                                                                                                                                                                                                                                                                                                                                | Phase 2 | 105 | 7-Jan     | 2-Feb-17  |
| VEGF inhibitor | NCT00394082 | ABI-007 In Combination With Bevacizumab in Women With Metastatic Breast Cancer                                                                                                                 | Completed | Metastatic Breast Cancer                                                                                                                                                                                                                                                   | Drug: ABI-007 Drug: Bevacizumab                                                                                                                    | Participants With At Least One Treatment-Emergent Adverse Event (TEAE) Kaplan-Meier Estimates for Progression-free Survival Percentage of Participants With Objective Confirmed Complete or Partial Overall Response According to Response Evaluation Criteria in Solid Tumors (RECIST) Percentage of Participants With Stable Disease for >= 16 Weeks, or Complete or Partial Response According to Response Evaluation Criteria in Solid Tumors (RECIST) Kaplan-Meier Estimate for Duration of Response Kaplan-Meier                                                                                                                                                                                                                                                                                                                                                                                                                                                                   | Phase 2 | 50  | 1-Jun-06  | 25-Nov-19 |
| VEGF inhibitor | NCT00734890 | Vandetanib and Bevacizumab in Treating Patients With Advanced Solid Tumors or Lymphoma                                                                                                         | Completed | Lung Cancer Lymphoma Lymphoproliferative Disorder Small Intestine Cancer Unspecified Adult Solid Tumor, Protocol Specific                                                                                                                                                  | Biological: bevacizumab Drug: vandetanib Other: laboratory biomarker analysis Other: pharmacological study                                         | Maximum tolerated dose Safety Toxicity                                                                                                                                                                                                                                                                                                                                                                                                                                                                                                                                                                                                                                                                                                                                                                                                                                                                                                                                                   | Phase 1 | 18  | 8-Mar     | 16-Mar-12 |
| VEGF inhibitor | NCT01802684 | OPTIMOX-afibercept as First-line Therapy in Patients With Unresectable Metastatic Colorectal                                                                                                   | Completed | Unresectable Metastatic Colorectal Cancer                                                                                                                                                                                                                                  | Biological: afibercept                                                                                                                             | Progression free survival at 6 months Median Progression Free Survival duration of disease control (DDC) Overall Survival tumor Response Rate (RR) Health related Quality of life Safety Curative salvage surgery                                                                                                                                                                                                                                                                                                                                                                                                                                                                                                                                                                                                                                                                                                                                                                        | Phase 2 | 49  | 13-May    | 1-Mar-17  |
| VEGF inhibitor | NCT01459380 | Pegylated Liposomal Doxorubicin Hydrochloride, Carboplatin, Veliparib, and Bevacizumab in Treating Patients With Recurrent Ovarian Cancer, Primary Peritoneal Cancer, or Fallopian Tube Cancer | Completed | Ovarian Clear Cell Cystadenocarcinoma Ovarian Endometrioid Adenocarcinoma Ovarian Seromucinous Carcinoma Ovarian Serosus Cystadenocarcinoma Recurrent Fallopian Tube Carcinoma Recurrent Ovarian Carcinoma Recurrent Primary Peritoneal Carcinoma Undifferentiated Ovarian | Biological: Bevacizumab Drug: Carboplatin Other: Laboratory Biomarker Analysis Drug: Pegylated Liposomal Doxorubicin Hydrochloride Drug: Veliparib | DLT assessed by NCI CTCAE version 4 Dose-limiting toxicity (DLT), assessed by the National Cancer Institute (NCI) Common Terminology Criteria for Adverse Events (CTCAE) version 4 Incidence of adverse events as assessed by CTEP version 4 of the NCI CTCAE Objective tumor response (complete and partial response)                                                                                                                                                                                                                                                                                                                                                                                                                                                                                                                                                                                                                                                                   | Phase 1 | 41  | 11-Oct-11 | 22-Jul-19 |
| VEGF inhibitor | NCT00436332 | S0635: Erlotinib and Bevacizumab in Stage IIIB and IV Bronchioloalveolar Carcinoma                                                                                                             | Completed | Lung Cancer                                                                                                                                                                                                                                                                | Biological: bevacizumab Drug: erlotinib hydrochloride                                                                                              | Overall Survival Progression-free Survival Response as Assessed by RECIST Criteria vs Central Computer-assisted Image-analysis System in Patients With Measurable Disease Frequency and Severity of Toxicities                                                                                                                                                                                                                                                                                                                                                                                                                                                                                                                                                                                                                                                                                                                                                                           | Phase 2 | 84  | 7-Jul     | 13-Nov-19 |
| VEGF inhibitor | NCT00883688 | Bevacizumab and Lapatinib in Children With Recurrent or Refractory Ependymoma                                                                                                                  | Completed | Brain Cancer Pediatric Cancers                                                                                                                                                                                                                                             | Drug: Bevacizumab Drug: Lapatinib                                                                                                                  | Objective Response Rate                                                                                                                                                                                                                                                                                                                                                                                                                                                                                                                                                                                                                                                                                                                                                                                                                                                                                                                                                                  | Phase 2 | 24  | 9-Jul     | 18-Nov-15 |

|                |             |                                                                                                                                                           |           |                                                                                                                                                                                                                                                                                                                                        |                                                                                                                                                                  |                                                                                                                                                                                                                                                                                                                                                                                                                                                                                                                                                                                                                                                                                                                                                                                                                                                                                              |                |     |           |           |
|----------------|-------------|-----------------------------------------------------------------------------------------------------------------------------------------------------------|-----------|----------------------------------------------------------------------------------------------------------------------------------------------------------------------------------------------------------------------------------------------------------------------------------------------------------------------------------------|------------------------------------------------------------------------------------------------------------------------------------------------------------------|----------------------------------------------------------------------------------------------------------------------------------------------------------------------------------------------------------------------------------------------------------------------------------------------------------------------------------------------------------------------------------------------------------------------------------------------------------------------------------------------------------------------------------------------------------------------------------------------------------------------------------------------------------------------------------------------------------------------------------------------------------------------------------------------------------------------------------------------------------------------------------------------|----------------|-----|-----------|-----------|
| VEGF inhibitor | NCT01189877 | Characterization of Rectal Cancer Hypoxia Using pO2 Histography and Immunohistochemistry for Hypoxia-Related Proteins                                     | Completed | Rectal Cancer                                                                                                                                                                                                                                                                                                                          | Procedure: Eppendorf hypoximeter                                                                                                                                 | Measure pO2 in rectal cancers Correlate immunohistochemical analysis of endogenous markers of hypoxia                                                                                                                                                                                                                                                                                                                                                                                                                                                                                                                                                                                                                                                                                                                                                                                        | Not Applicable | 30  | 10-Aug    | 11-Oct-12 |
| VEGF inhibitor | NCT00614653 | Bevacizumab, Erlotinib and Capecitabine for Advanced Pancreatic Cancer                                                                                    | Completed | Pancreatic Cancer                                                                                                                                                                                                                                                                                                                      | Drug: Bevacizumab Drug: Erlotinib Drug: Capecitabine Radiation: Radiation Therapy                                                                                | Highest Tolerated Dose of Capecitabine, Erlotinib Hydrochloride, and Bevacizumab + Radiation Response Rate of Addition of Bevacizumab and Erlotinib to Capecitabine-Based Chemoradiation                                                                                                                                                                                                                                                                                                                                                                                                                                                                                                                                                                                                                                                                                                     | Phase 1        | 17  | 8-Jan     | 1-Aug-16  |
| VEGF inhibitor | NCT00354978 | Study of FOLFIRI Plus Bevacizumab in Colorectal Cancer Patients                                                                                           | Completed | Colorectal Cancer                                                                                                                                                                                                                                                                                                                      | Drug: 5-Fluorouracil Drug: Bevacizumab Drug: Leucovorin Drug:                                                                                                    | Median Progression-free Survival (PFS)                                                                                                                                                                                                                                                                                                                                                                                                                                                                                                                                                                                                                                                                                                                                                                                                                                                       | Phase 2        | 49  | 5-Jan     | 21-Oct-11 |
| VEGF inhibitor | NCT00782002 | Safety Study of IMC-18F1, to Treat Advanced Solid Tumors in Subjects That no Longer Respond to Standard                                                   | Completed | Advanced Solid Tumors                                                                                                                                                                                                                                                                                                                  | Biological: IMC-18F1                                                                                                                                             | Maximum Tolerated Dose Pharmacokinetics Antitumor Activity of IMC-18F1 Monotherapy Pharmacodynamics                                                                                                                                                                                                                                                                                                                                                                                                                                                                                                                                                                                                                                                                                                                                                                                          | Phase 1        | 27  | 6-Jul     | 30-Sep-10 |
| VEGF inhibitor | NCT00055861 | Bevacizumab and Docetaxel in Treating Women With Locally Advanced or Metastatic Breast                                                                    | Completed | Recurrent Breast Cancer Stage IV Breast Cancer                                                                                                                                                                                                                                                                                         | Biological: bevacizumab Drug: docetaxel Other: laboratory biomarker analysis                                                                                     | Response rate according to Response Evaluation Criteria in Solid Tumors (RECIST) Side effects as assessed by the National Cancer Institute (NCI) Common Toxicity Criteria (CTC) version 2.0 Correlation of biologic studies with clinical outcomes                                                                                                                                                                                                                                                                                                                                                                                                                                                                                                                                                                                                                                           | Phase 2        | 27  | 2-Jul     | 4-Jun-13  |
| VEGF inhibitor | NCT01213238 | Hepatic Arterial Infusion Oxaliplatin, Capecitabine With or Without Bevacizumab                                                                           | Completed | Advanced Cancers                                                                                                                                                                                                                                                                                                                       | Drug: Oxaliplatin Drug: Capecitabine Drug: Bevacizumab                                                                                                           | Maximum Tolerated Dose (MTD) of Hepatic Arterial Infusion (HAI) Oxaliplatin, with Oral Capecitabine, with or without Systemic Intravenous Bevacizumab                                                                                                                                                                                                                                                                                                                                                                                                                                                                                                                                                                                                                                                                                                                                        | Phase 1        | 116 | 30-Sep-10 | 15-Mar-19 |
| VEGF inhibitor | NCT00085111 | Bevacizumab in Treating Young Patients With Refractory Solid                                                                                              | Completed | Unspecified Childhood Solid Tumor, Protocol Specific                                                                                                                                                                                                                                                                                   | Biological: bevacizumab                                                                                                                                          | Maximum tolerated dose defined based on the dose-limiting toxicities graded according to Common Terminology Criteria for Adverse Events v3.0                                                                                                                                                                                                                                                                                                                                                                                                                                                                                                                                                                                                                                                                                                                                                 | Phase 1        | 24  | 3-Dec     | 5-Jun-13  |
| VEGF inhibitor | NCT01263782 | BATTLE-FL: Front-Line Biomarker-Integrated Treatment Study in Non Small Cell Lung Cancer                                                                  | Completed | Lung Cancer                                                                                                                                                                                                                                                                                                                            | Drug: Carboplatin Drug: Pemetrexed Drug: Bevacizumab Drug: Cixutumumab                                                                                           | Progression Free Survival Overall Response Rate                                                                                                                                                                                                                                                                                                                                                                                                                                                                                                                                                                                                                                                                                                                                                                                                                                              | Phase 2        | 64  | 17-May-11 | 15-May-19 |
| VEGF inhibitor | NCT00748891 | DCE CT/MRI Scanning Study in Patients With Solid Tumours (AstraZeneca and Royal Marsden Hospital Imaging Study)                                           | Completed | Cancer                                                                                                                                                                                                                                                                                                                                 | Drug: Receptin (Cediranib)                                                                                                                                       | Percentage change in DCE-MRI and DCE-CT vascular parameters. Comparison between vascular parameters of each imaging modality and between modalities. Baseline measurements for DCE-MRI-iAUC60(mMol/sec),Ktrans(min-1),ve, vp,kep(min-1),Enhancing Fraction% DCE-CT-Permeability Surface Product(ml/min/100g),Perfusion(ml/min/100g),Mean Transit Time(sec),Blood Volume (ml/100g),Positive Enhancement Integral(Hus), Objective tumour response (RECIST) Progression free survival Baseline and on treatment time-point measurements for                                                                                                                                                                                                                                                                                                                                                     | Phase 1        | 35  | 8-Aug     | 1-Jul-11  |
| VEGF inhibitor | NCT00408694 | Bevacizumab, Cisplatin, Radiation Therapy, and Fluorouracil in Treating Patients With Stage IIB, Stage III, Stage IVA, or Stage IVB Nasopharyngeal Cancer | Completed | Stage II Nasopharyngeal Keratinizing Squamous Cell Carcinoma AJCC v7 Stage III Nasopharyngeal Keratinizing Squamous Cell Carcinoma AJCC v7 Stage III Nasopharyngeal Undifferentiated Carcinoma AJCC v7 Stage IV Nasopharyngeal Keratinizing Squamous Cell Carcinoma AJCC v7 Stage IV Nasopharyngeal Undifferentiated Carcinoma AJCC v7 | Radiation: 3-Dimensional Conformal Radiation Therapy Biological: Bevacizumab Drug: Cisplatin Drug: Fluorouracil Radiation: Intensity-Modulated Radiation Therapy | Percentage of Patients With a Grade 4 Hemorrhage or Any Grade 5 Adverse Event Assessed to be Definitely, Probably, or Possibly Related to Protocol Treatment During the First Year. Percentage of Patients With Grade 4 Hemorrhage or Any Grade 5 Adverse Event Assessed to be Definitely, Probably, or Possibly Related to Protocol Treatment After the First Year. Patient Tolerability to Each Component (Concurrent and Adjuvant) of the Protocol Treatment Regimen Death During or Within 30 Days of Discontinuation of Protocol Treatment. One- and Two-year Distant Metastases-free Rates One- and Two-year Loco-regional Progression-free Rates One- and Two-year Progression-free Survival Rates One- and Two-year Overall Survival Rates Percentage of Patients With Other Grade 3-5 Adverse Events Assessed to be Definitely, Probably, or Possibly Related to Protocol Treatment | Phase 2        | 46  | 13-Dec-06 | 30-Jan-18 |
| VEGF inhibitor | NCT00533585 | BAY 43-9006 in Previously Untreated Patients With Non-Small Cell Lung Cancer (NSCLC)                                                                      | Completed | Lung Cancer                                                                                                                                                                                                                                                                                                                            | Drug: BAY 43-9006 Drug: Paclitaxel Drug: Carboplatin Drug: Bevacizumab                                                                                           | Maximum Tolerated Dose (MTD) of BAY 43-9006 (sorafenib) and Bevacizumab in Combination with Carboplatin and Paclitaxel                                                                                                                                                                                                                                                                                                                                                                                                                                                                                                                                                                                                                                                                                                                                                                       | Phase 1        | 23  | 6-May     | 10-Feb-16 |
| VEGF inhibitor | NCT00017394 | Bevacizumab Plus Vinorelbine in Treating Patients With Stage IV Breast Cancer                                                                             | Completed | Male Breast Cancer Recurrent Breast Cancer Stage IV Breast Cancer                                                                                                                                                                                                                                                                      | Biological: bevacizumab Drug: vinorelbine tartrate Other: laboratory biomarker analysis                                                                          | Response rate to combination therapy with bevacizumab and vinorelbine, defined by the Response Evaluation Criteria in Solid Tumors (RECIST) criteria Time to progression Toxicities, graded according to the National Cancer Institute Common Toxicity                                                                                                                                                                                                                                                                                                                                                                                                                                                                                                                                                                                                                                       | Phase 2        | 56  | 1-Mar     | 17-Jan-13 |
| VEGF inhibitor | NCT00506155 | Neoadjuvant Chemotherapy With Methotrexate, Vinblastine, Adriamycin and Cisplatin (M-VAC) Plus Avastin in Patients With Urothelial Cancer                 | Completed | Bladder Cancer                                                                                                                                                                                                                                                                                                                         | Drug: Avastin Drug: Cisplatin Drug: Doxorubicin Drug: Methotrexate Drug: Vinblastine Sulfate                                                                     | Percentage of Participants With Response Defined as the Absence of Residual Muscle Invasive Cancer in Resected Specimen 5-year Overall Survival (OS)                                                                                                                                                                                                                                                                                                                                                                                                                                                                                                                                                                                                                                                                                                                                         | Phase 2        | 60  | 7-Jun     | 31-Mar-16 |
| VEGF inhibitor | NCT01223027 | Study of Dovitinib Versus Sorafenib in Patients With Metastatic Renal Cell Carcinoma                                                                      | Completed | Metastatic Renal Cell Carcinoma                                                                                                                                                                                                                                                                                                        | Drug: Dovitinib Drug: Sorafenib                                                                                                                                  | Progression Free Survival (PFS) Per Independent Central Radiology Review Overall Survival (OS) Progression Free Survival (PFS) Per Investigator's Radiology Review Percentage of Participants With Overall Response Rate (ORR) by Central Radiology Review Time to Definitive Worsening of Karnofsky Performance Status (KPS) Patient-reported Outcomes (PROs): Time to Deterioration of Functional Assessment of Cancer Therapy-Kidney Symptom Index, Disease Related Symptoms (FKSI-DRS) by at Least 2 Scores Patient-reported Outcomes (PROs): Time to Definitive Deterioration of the Physical Functioning (PF) Scale of EORTC QLQ-C30 by at Least 10% Patient-reported Outcomes (PROs): Time to Definitive Deterioration of the Quality of                                                                                                                                              | Phase 3        | 564 | 11-Mar    | 7-Dec-15  |

|                |              |                                                                                                                                                                                                                       |           |                                                                                                                               |                                                                                            |                                                                                                                                                                                                                                                                                                                                                                                                                                                                                                                                                                                                                                                                                                                                                                                                                                                                                                                                                                                                                                                                                                                                                                                                                                                                                            |                 |     |          |           |
|----------------|--------------|-----------------------------------------------------------------------------------------------------------------------------------------------------------------------------------------------------------------------|-----------|-------------------------------------------------------------------------------------------------------------------------------|--------------------------------------------------------------------------------------------|--------------------------------------------------------------------------------------------------------------------------------------------------------------------------------------------------------------------------------------------------------------------------------------------------------------------------------------------------------------------------------------------------------------------------------------------------------------------------------------------------------------------------------------------------------------------------------------------------------------------------------------------------------------------------------------------------------------------------------------------------------------------------------------------------------------------------------------------------------------------------------------------------------------------------------------------------------------------------------------------------------------------------------------------------------------------------------------------------------------------------------------------------------------------------------------------------------------------------------------------------------------------------------------------|-----------------|-----|----------|-----------|
| VEGF inhibitor | NCT009 98296 | Phase I Dose Escalation Study of Concomitant BIBF 1120 and BIBW 2992 in Patients With Advanced Solid Tumours.                                                                                                         | Completed | Neoplasms                                                                                                                     | Drug: BIBW 2992 Drug: BIBF 1120                                                            | Maximum Tolerated Dose (MTD) of Nintedanib and Afatinib Based on the Percentage of Participants Experienced Dose Limiting Toxicities Overall Tumour Response Rate Assessed by the Investigator According to the Response Evaluation Criteria In Solid Tumours (RECIST) Version 1.1 Incidence and Intensity of Adverse Events According to CTCAE (Common Toxicity Criteria Adverse Event) Version 3.0 Changes in Safety Laboratory Parameters Cpre.ss, Norm (Dose Normalized Trough Plasma Concentration of Nintedanib at Steady State) Trough Plasma Concentration of Afatinib at Steady State Objective Response (OR) During the Expansion Phase Disease Control (DC) During the Expansion Phase Stable Disease for at Least 12 Weeks During the Expansion                                                                                                                                                                                                                                                                                                                                                                                                                                                                                                                                | Phase 1         | 70  | 9-Oct    | 19-Aug-15 |
| VEGF inhibitor | NCT004 16637 | Bevacizumab in Treating Patients With Advanced Solid Tumors                                                                                                                                                           | Completed | Unspecified Adult Solid Tumor, Protocol Specific                                                                              | Biological: Bevacizumab (Avastin)                                                          |                                                                                                                                                                                                                                                                                                                                                                                                                                                                                                                                                                                                                                                                                                                                                                                                                                                                                                                                                                                                                                                                                                                                                                                                                                                                                            | Phase 1         | 27  | 4-Jan    | 7-Jul-16  |
| VEGF inhibitor | NCT001 34355 | Study of PTK787 in the Treatment of Patients With Non-Metastatic Androgen Independent Prostate                                                                                                                        | Completed | Prostate Cancer                                                                                                               | Drug: PTK787                                                                               | Time To Progression (TTP) in Weeks Number of Toxicities in Patients Treated with PTK787 Overall Survival                                                                                                                                                                                                                                                                                                                                                                                                                                                                                                                                                                                                                                                                                                                                                                                                                                                                                                                                                                                                                                                                                                                                                                                   | Phase 2         | 5   | 5-Jul    | 19-Jan-15 |
| VEGF inhibitor | NCT009 11170 | PAVES: Pegfilgrastim Anti-vascular Endothelial Growth Factor (VEGF) Evaluation Study                                                                                                                                  | Completed | Cancer Colon Cancer Colorectal Cancer Fever Locally Advanced Metastatic Colorectal Cancer Neutropenia Rectal Cancer           | Drug: Pegfilgrastim Drug: Bevacizumab Drug: Standard Chemotherapy                          | Percentage of Participants With Grade 3/4 Febrile Neutropenia Across the First 4 Cycles of Chemotherapy Overall Survival Progression Free Survival Time to Progression Percentage of Participants With an Objective Response Percentage of Participants With Grade 4 Febrile Neutropenia Across the First 4 Cycles of Chemotherapy Percentage of Participants With Grade 3/4 Neutropenia Across the First 4 Cycles of Chemotherapy Percentage of Participants With Grade 4 Neutropenia Across the                                                                                                                                                                                                                                                                                                                                                                                                                                                                                                                                                                                                                                                                                                                                                                                          | Phase 3         | 847 | 3-Nov-09 | 29-Dec-17 |
| VEGF inhibitor | NCT021 29933 | VEGF-targeted Fluorescence Near-Infrared (NIR) Endoscopy in (Pre)Malignant Esophageal Lesions                                                                                                                         | Completed | Esophageal Cancer Dysplasia                                                                                                   | Drug: Bevacizumab-IRDye800CW Device: Near infrared fluorescence endoscopy platform         | NIR fluorescent signal in vivo (prior to EMR) Number of participants with adverse events (AE), serious adverse events (SAE) and suspected unexpected serious adverse reactions (SUSAR). VEGF expression ex vivo NIR fluorescent signal in vivo (wound bed, post EMR) NIR fluorescent signal ex vivo (biopsy and EMR specimen)                                                                                                                                                                                                                                                                                                                                                                                                                                                                                                                                                                                                                                                                                                                                                                                                                                                                                                                                                              | Phase 1         | 14  | 14-Apr   | 25-Nov-16 |
| VEGF inhibitor | NCT016 60360 | Phase I Trial of Tanibirumab in Advanced or Metastatic Cancer                                                                                                                                                         | Completed | Advanced Cancer Metastatic Cancer                                                                                             | Biological: Tanibirumab                                                                    | Safety and tolerability Pharmacokinetics Efficacy                                                                                                                                                                                                                                                                                                                                                                                                                                                                                                                                                                                                                                                                                                                                                                                                                                                                                                                                                                                                                                                                                                                                                                                                                                          | Phase 1         | 26  | 11-Nov   | 29-Jan-14 |
| VEGF inhibitor | NCT025 97322 | Study of Axitinib for Downstaging Large Renal Tumors Not Primarily Suitable for Partial Nephrectomy (AXIPAN)                                                                                                          | Completed | cT2a N0NxM0 Renal Tumor                                                                                                       | Drug: AXITINIB                                                                             | The number of patients actually experiencing a partial nephrectomy for a tumor $\geq 7$ cm Response rate according to RECIST criteria Number of participants with treatment-related serious adverse events and their grades according to CTCAE V4.0. Renal function assessed by serum creatinin Renal function assessed by calculated glomerular filtration rate (GFR) according to MDRD formula Renal function assessed by                                                                                                                                                                                                                                                                                                                                                                                                                                                                                                                                                                                                                                                                                                                                                                                                                                                                | Phase 2         | 21  | 12-Feb   | 25-Jul-17 |
| VEGF inhibitor | NCT008 26540 | Sorafenib and Bevacizumab in Treating Patients With Metastatic Colorectal Cancer                                                                                                                                      | Completed | Recurrent Colon Cancer Recurrent Rectal Cancer Stage IV Colon Cancer Stage IV Rectal Cancer                                   | Drug: sorafenib tosylate Biological: bevacizumab                                           | Progression-free Survival Rate Response Rate Overall Survival Feasibility of Study Treatment                                                                                                                                                                                                                                                                                                                                                                                                                                                                                                                                                                                                                                                                                                                                                                                                                                                                                                                                                                                                                                                                                                                                                                                               | Phase 2         | 83  | 9-Sep    | 6-Sep-17  |
| VEGF inhibitor | NCT007 86383 | Study of IMC-1121B in Patients With Advanced Solid Tumors Not Responding To Standard Therapy                                                                                                                          | Completed | Cancer                                                                                                                        | Biological: IMC-1121B Biological: 1121B                                                    | Number of participants with Adverse Events (AEs) Maximum Tolerated Dose Maximum concentration (Cmax), cohorts 1, 2, 3, 4, and 5 Minimum concentration (Cmin), cohorts 1, 2, 3, 4, and 5 Area under concentration (AUC), cohorts 1, 2, 3, 4, and 5 Half-life (t 1/2), cohorts 1, 2, 3, 4, and 5 Clearance (Cl) rate drug is completely removed, cohorts 1, 2, 3, 4, and 5 Volume of distribution (Vss) at steady state, cohorts 1, 2, 3, 4, and 5 Serum Anti-IMC-1121B Antibody Assessment (immunogenicity) Change in tumor size from Baseline                                                                                                                                                                                                                                                                                                                                                                                                                                                                                                                                                                                                                                                                                                                                              | Phase 1         | 25  | 6-Feb    | 19-Aug-13 |
| VEGF inhibitor | NCT011 36733 | A Study of E7080 Alone, and in Combination With Everolimus in Subjects With Unresectable Advanced or Metastatic Renal Cell Carcinoma Following One Prior Vascular Endothelial Growth Factor (VEGF)-Targeted Treatment | Completed | Metastatic Renal Cell Carcinoma                                                                                               | Drug: Lenvatinib Drug: Everolimus                                                          | Phase 1b: Number of Participants With Dose-limiting Toxicity (DLT) Phase 1b: Maximum Tolerated Dose (MTD) and Recommended Phase 2 (RP2) Dose Phase 2: Progression-Free Survival (PFS) Phase 2: Overall Survival (OS) Phase 2: Objective Response Rate (ORR) Disease Control Rate (DCR) Durable Stable Disease (SD) Rate Clinical Benefit Rate (CBR) Summary of Plasma Concentrations of Lenvatinib for Sparse Pharmacokinetic (PK) Sampling for Phase 1b and Phase 2 Summary of Blood Concentrations of Everolimus for Sparse PK Sampling for Phase 1b and Phase 2 Area Under the Plasma Concentration-Time Curve From 0 to 24 Hours (AUC(0-24)) for Lenvatinib When Administered Alone or in Combination With Everolimus Maximum Concentration (Cmax) of Lenvatinib in Plasma When Administered Alone or in Combination With Everolimus Time to Cmax (Tmax) for Lenvatinib When Administered Alone or in Combination With Everolimus Area Under the Blood Concentration-Time Curve From 0 to 24 Hours for Everolimus When Administered Alone or in Combination With Lenvatinib Maximum Concentration of Everolimus (Cmax) in Blood When Administered Alone or in Combination With Lenvatinib Time to Cmax (Tmax) for Everolimus When Administered Alone or in Combination With Lenvatinib | Phase 1 Phase 2 | 173 | 5-Aug-10 | 27-Feb-19 |
| VEGF inhibitor | NCT001 26542 | Bevacizumab and Erlotinib in Treating Patients With Recurrent or Metastatic Ovarian Epithelial, Fallopian Tube, or Primary Peritoneal Cavity Cancer                                                                   | Completed | Fallopian Tube Cancer Primary Peritoneal Cavity Cancer Recurrent Ovarian Epithelial Cancer Stage IV Ovarian Epithelial Cancer | Biological: bevacizumab Drug: erlotinib hydrochloride Other: laboratory biomarker analysis | Response rate of patients treated with the combination of bevacizumab and OSI-774 Progression-free survival Median progression-free survival Overall survival                                                                                                                                                                                                                                                                                                                                                                                                                                                                                                                                                                                                                                                                                                                                                                                                                                                                                                                                                                                                                                                                                                                              | Phase 2         | 35  | 5-Apr    | 14-May-14 |
| VEGF inhibitor | NCT010 57264 | HAI Abraxane With Gemcitabine and Bevacizumab                                                                                                                                                                         | Completed | Advanced Cancers                                                                                                              | Drug: HAI Abraxane Drug: Gemcitabine Drug: Bevacizumab Drug:                               | Maximum Tolerated Dose (MTD) of Escalating Doses of Hepatic Arterial Infusions of Abraxane in Combination with Gemcitabine and Bevacizumab                                                                                                                                                                                                                                                                                                                                                                                                                                                                                                                                                                                                                                                                                                                                                                                                                                                                                                                                                                                                                                                                                                                                                 | Phase 1         | 78  | 10-Jan   | 18-Nov-15 |



|                |             |                                                                                                                                                                           |           |                                                                                                                                                                                                                                                                                                                                                                                                                            |                                                               |                                                                                                                                                                                                                                                                                                                                                                                                                                                                                                                                                                                                                                                                                                                                                                         |                 |     |           |           |
|----------------|-------------|---------------------------------------------------------------------------------------------------------------------------------------------------------------------------|-----------|----------------------------------------------------------------------------------------------------------------------------------------------------------------------------------------------------------------------------------------------------------------------------------------------------------------------------------------------------------------------------------------------------------------------------|---------------------------------------------------------------|-------------------------------------------------------------------------------------------------------------------------------------------------------------------------------------------------------------------------------------------------------------------------------------------------------------------------------------------------------------------------------------------------------------------------------------------------------------------------------------------------------------------------------------------------------------------------------------------------------------------------------------------------------------------------------------------------------------------------------------------------------------------------|-----------------|-----|-----------|-----------|
| VEGF inhibitor | NCT00828139 | S0802 - Topotecan With or Without Afibercept in Treating Patients With Extensive-Stage Small Cell Lung                                                                    | Completed | Extensive Stage Small Cell Lung Cancer Recurrent Small Cell Lung Cancer                                                                                                                                                                                                                                                                                                                                                    | Biological: ziv-afibercept Drug: topotecan hydrochloride      | Progression-free Survival (PFS) Overall Survival Response Rate (Confirmed and Unconfirmed, Complete and Partial Responses) Number of Patients With Grade 3 Through 5 Adverse Events That Are Related to Study Drugs                                                                                                                                                                                                                                                                                                                                                                                                                                                                                                                                                     | Phase 2         | 189 | 9-May     | 21-Aug-17 |
| VEGF inhibitor | NCT00491855 | Oxaliplatin and Paclitaxel Plus Bevacizumab in Advanced Peritoneal Carcinomatosis                                                                                         | Completed | Peritoneal Cancer                                                                                                                                                                                                                                                                                                                                                                                                          | Drug: Bevacizumab Drug: Oxaliplatin Drug: Paclitaxel          | Maximum Tolerated Dose (MTD)                                                                                                                                                                                                                                                                                                                                                                                                                                                                                                                                                                                                                                                                                                                                            | Phase 1         | 3   | 7-Jun     | 3-Jan-13  |
| VEGF inhibitor | NCT02340611 | A Study of Cediranib and Olaparib at the Time Ovarian Cancer Worsens on Olaparib                                                                                          | Completed | Ovarian Cancer                                                                                                                                                                                                                                                                                                                                                                                                             | Drug: Olaparib Drug: Cediranib                                | Percentage of patients whose cancer shrinks or disappears after treatment Percentage of decrease in CA-125 levels after treatment Mutation status of genes compared to response to treatment Number of occurrences per side effect and severity Assess patient reported                                                                                                                                                                                                                                                                                                                                                                                                                                                                                                 | Phase 2         | 4   | 15-Jun    | 12-Jun-18 |
| VEGF inhibitor | NCT01346540 | A Phase I/II Study of Continuous Oral Treatment With BIBF 1120 Added to Standard Gemcitabine/Cisplatin Therapy in First Line NSCLC Patients With Squamous Cell Histology. | Completed | Carcinoma, Non-Small-Cell Lung                                                                                                                                                                                                                                                                                                                                                                                             | Drug: BIBF 1120 Drug: Placebo                                 | Number of Participants With Dose Limiting Toxicities (DLTs) During First Cycle for the Determination of the Maximum Tolerated Dose (MTD) Maximum Tolerated Dose (MTD) of Nintedanib Added to Cisplatin/Gemcitabine Based on the Occurrence of DLTs During Treatment Cycle 1. Incidence of Adverse Events (AEs) According to the Common Terminology Criteria for Adverse Events (CTCAE) Version 3.00                                                                                                                                                                                                                                                                                                                                                                     | Phase 1         | 16  | 14-Apr-11 | 10-Sep-18 |
| VEGF inhibitor | NCT00502307 | A Study of Tivozanib (AV-951), an Oral VEGF Receptor Tyrosine Kinase Inhibitor, in the Treatment of Renal Cell Carcinoma                                                  | Completed | Carcinoma, Renal Cell                                                                                                                                                                                                                                                                                                                                                                                                      | Drug: Tivozanib (AV-951) Drug: Placebo comparator             | To determine the safety of tivozanib (AV-951) with this dose schedule To determine objective response (CR + PR) rate at 16 weeks To determine the percentage of randomly assigned patients remaining progression free at 12 weeks following random assignment to tivozanib (AV-951) or placebo Determine the progression-free-survival after random assignment (randomized sub-set only) Overall progression-free survival (from start of treatment) Characterization of pharmacokinetic and pharmacodynamic (PD) profiles of                                                                                                                                                                                                                                           | Phase 2         | 272 | 7-Oct     | 5-Oct-12  |
| VEGF inhibitor | NCT01898130 | Bevacizumab in Pats w/ Recurrent ST Brain Metas Who Have Failed Whole Brain Radiation Therapy                                                                             | Completed | Metastatic Cancer Unspecified Adult Solid Tumor, Protocol Specific                                                                                                                                                                                                                                                                                                                                                         | Biological: bevacizumab Procedure: quality-of-life assessment | Objective Radiographic Tumor Response in Patients With Recurrent Solid Tumor Brain Metastases Treated With Bevacizumab Progression-Free Survival (PFS) at 6 Months in Patients With Recurrent Solid Tumor Brain Metastases Treated With Bevacizumab Time to Progression in Patients With Recurrent Solid Tumor Brain Metastases Treated With Bevacizumab Time to Response in Patients With Recurrent Solid Tumor Brain Metastases Treated With Bevacizumab Duration of Response in Patients With Recurrent Solid Tumor Brain Metastases Treated With Bevacizumab Overall Survival (OS) in Patients With Recurrent Solid Tumor Brain Metastases Treated With Bevacizumab Toxicity of Bevacizumab in Patients With Recurrent Solid Tumor Brain Metastases Quality of Life | Phase 2         | 27  | 27-Nov-13 | 17-Sep-19 |
| VEGF inhibitor | NCT01529138 | Study of Axitinib and Temozolimus in Solid Tumors                                                                                                                         | Completed | Cancer                                                                                                                                                                                                                                                                                                                                                                                                                     | Drug: Axitinib Drug: Temozolimus                              | Changes in the largest diameter (unidimensional measurement) of the tumor lesions and the shortest diameter in the case of malignant lymph nodes are used in the Response Evaluation Criteria in Solid Tumors (RECIST) criteria for evaluation.                                                                                                                                                                                                                                                                                                                                                                                                                                                                                                                         | Phase 1         | 13  | 11-Oct    | 13-Apr-15 |
| VEGF inhibitor | NCT00047788 | Efficacy Study of ZD6474 to Treat Multiple Myeloma Cancer                                                                                                                 | Completed | Multiple Myeloma                                                                                                                                                                                                                                                                                                                                                                                                           | Drug: ZD6474 Drug: VEGF-receptor tyrosine kinase (KDR)        |                                                                                                                                                                                                                                                                                                                                                                                                                                                                                                                                                                                                                                                                                                                                                                         | Phase 2         | 30  | 2-Oct     | 24-Aug-16 |
| VEGF inhibitor | NCT00793975 | Study of IMC-1121B in Patients With Tumors That Have Not Responded to Therapy                                                                                             | Completed | Advanced Solid Tumors                                                                                                                                                                                                                                                                                                                                                                                                      | Biological: IMC-1121B Biological: 1121B                       | Number of participants with Adverse Events (AEs) Maximum Tolerated Dose Maximum concentration (Cmax), cohorts 1, 2, 3, 4, 5, 6, and 7 Minimum concentration (Cmin), cohorts 1, 2, 3, 4, 5, 6, and 7 Area under concentration (AUC), cohorts 1, 2, 3, 4, 5, 6, and 7 Half-life (t 1/2), cohorts 1, 2, 3, 4, 5, 6, and 7 Clearance (Cl) rate drug is completely removed, cohorts 1, 2, 3, 4, 5, 6, and 7 Volume of distribution (Vss) at steady state, cohorts 1, 2, 3, 4, 5, 6, and 7 Serum Anti-IMC-1121B Antibody Assessment                                                                                                                                                                                                                                           | Phase 1         | 37  | 5-Jan     | 19-Aug-13 |
| VEGF inhibitor | NCT00483834 | A Phase II Study of Bevacizumab, Irinotecan and Capecitabine in Patients With Previously Untreated Metastatic Colorectal Cancer                                           | Completed | Colorectal Cancer                                                                                                                                                                                                                                                                                                                                                                                                          | Drug: Bevacizumab Drug: Irinotecan Drug: Capecitabine         | Objective Response Rate                                                                                                                                                                                                                                                                                                                                                                                                                                                                                                                                                                                                                                                                                                                                                 | Phase 2         | 50  | 6-Dec     | 15-Feb-19 |
| VEGF inhibitor | NCT03251443 | A Study of Second-line Treatment With Apatinib in Patients With Advanced Intrahepatic                                                                                     | Completed | Intrahepatic Cholangiocarcinoma Second-line Treatment                                                                                                                                                                                                                                                                                                                                                                      | Drug: Apatinib                                                | Progression-free Survival (PFS) Objective Response Rate (ORR) Disease Control Rate (DCR) Overall Survival (OS) Incidence of Treatment-Emergent Adverse Event                                                                                                                                                                                                                                                                                                                                                                                                                                                                                                                                                                                                            | Phase 2         | 34  | 8-Aug-17  | 16-Jul-19 |
| VEGF inhibitor | NCT00055692 | Bevacizumab in Treating Patients With Unresectable Nonmetastatic Liver Cancer                                                                                             | Completed | Adult Primary Hepatocellular Carcinoma Localized Unresectable Adult Primary Liver Cancer Recurrent Adult Primary Liver Cancer                                                                                                                                                                                                                                                                                              | Biological: bevacizumab                                       | Progression-free Survival Disease Response Mean Arterial Enhancement, Per Lesion, as Determined by Dynamic Gadolinium-enhanced Magnetic Resonance Imaging (MRI), Before and Following Bevacizumab Therapy. Assessment on Circulating Levels of VEGF Which Also Contribute to HCC Pathogenesis and on Potential Alterations of These Levels in the Setting of VEGF-inhibition To Collect Information on Hepatic Function and Hepatitis Viral Activity in Cirrhosis and Upon Potential Alterations in the Setting of VEGF-inhibitor                                                                                                                                                                                                                                       | Phase 2         | 46  | 3-Feb     | 29-Feb-16 |
| VEGF inhibitor | NCT00407485 | VEGF Trap in Treating Patients With Recurrent, Locally Advanced, or Metastatic Cancer of the Urothelium                                                                   | Completed | Adenocarcinoma of the Bladder Distal Urethral Cancer Metastatic Transitional Cell Cancer of the Renal Pelvis and Ureter Proximal Urethral Cancer Recurrent Bladder Cancer Recurrent Transitional Cell Cancer of the Renal Pelvis and Ureter Recurrent Urethral Cancer Squamous Cell Carcinoma of the Bladder Stage III Bladder Cancer Stage III Urethral Cancer Stage IV Bladder Cancer Transitional Cell Carcinoma of the | Biological: ziv-afibercept Other: pharmacological study       | Tumor Response Rate Progression-free Survival (PFS)                                                                                                                                                                                                                                                                                                                                                                                                                                                                                                                                                                                                                                                                                                                     | Phase 2         | 22  | 6-Nov     | 20-Oct-14 |
| VEGF inhibitor | NCT01949688 | Safety and Efficacy Study of Epitope Peptide To Treat HLA-A*24 or A*02-positive Advanced Solid Tumors                                                                     | Completed | Solid Tumors                                                                                                                                                                                                                                                                                                                                                                                                               | Biological: HLA-A*2402 or A*0201 restricted peptides          | Evaluation of safety: the number of adverse events of vaccination therapy Evaluation of clinical efficacy: Overall survival. Various immunological responses including peptides specific CTL, antigen cascade, regulatory T cells, cancer antigens and HLA levels. Evaluation of clinical efficacy: Progression free survival. Evaluation of clinical efficacy: Tumor markers. Evaluation of clinical efficacy: Objective response rate.                                                                                                                                                                                                                                                                                                                                | Phase 1 Phase 2 | 26  | 10-Jun    | 19-Mar-19 |

|                |             |                                                                                                                                   |           |                                                                                                                                                                                               |                                                                                                                |                                                                                                                                                                                                                                                                                                                               |                 |     |           |           |
|----------------|-------------|-----------------------------------------------------------------------------------------------------------------------------------|-----------|-----------------------------------------------------------------------------------------------------------------------------------------------------------------------------------------------|----------------------------------------------------------------------------------------------------------------|-------------------------------------------------------------------------------------------------------------------------------------------------------------------------------------------------------------------------------------------------------------------------------------------------------------------------------|-----------------|-----|-----------|-----------|
| VEGF inhibitor | NCT00665990 | Phase I Study of Bevacizumab and Sorafenib Combined With Low Dose Cyclophosphamide in Patients With Refractory Solid Tumors and   | Completed | Refractory Solid Tumors Leukemia                                                                                                                                                              | Drug: Bevacizumab Drug: Sorafenib Drug: Cyclophosphamide                                                       | Determine the maximum tolerated dose and dose limiting toxicity of bevacizumab and sorafenib administered in combination with low dose cyclophosphamide to patients with refractory solid tumors.                                                                                                                             | Phase 1         | 49  | 7-Nov     | 9-Jan-15  |
| VEGF inhibitor | NCT00055809 | Bevacizumab and PEG-Interferon Alfa-2b in Treating Patients With Metastatic or Unresectable Carcinoid                             | Completed | Metastatic Gastrointestinal Carcinoid Tumor Recurrent Gastrointestinal Carcinoid Tumor Regional Gastrointestinal Carcinoid Tumor                                                              | Biological: PEG-interferon alfa-2b Biological: bevacizumab Other: laboratory biomarker analysis                | Tumor response rate (CR + PR) as measured by RECIST criteria Progression free survival Biochemical response rate measured after treatment Toxicity graded according to CTC v3.0 criteria for adverse outcomes                                                                                                                 | Phase 2         | 44  | 3-Jan     | 23-Jan-13 |
| VEGF inhibitor | NCT00543842 | Bevacizumab, Erlotinib, and Capecitabine for Locally Advanced Rectal Cancer                                                       | Completed | Rectal Cancer                                                                                                                                                                                 | Drug: Bevacizumab Drug: Capecitabine Drug: Erlotinib Radiation: Radiation Therapy Procedure: Surgery           | Maximal tolerated dose (MTD)                                                                                                                                                                                                                                                                                                  | Phase 1         | 19  | 7-Dec     | 26-Feb-15 |
| VEGF inhibitor | NCT00336648 | Preop Chemoradiation Resectable Pancreas                                                                                          | Completed | Pancreatic Neoplasms                                                                                                                                                                          | Drug: Avastin (Bevacizumab) Drug: Gemcitabine Procedure: Radiation Therapy                                     | Number of Patients with Resection                                                                                                                                                                                                                                                                                             | Phase 2         | 11  | 6-Jun     | 30-Jul-12 |
| VEGF inhibitor | NCT00025233 | Bevacizumab in Treating Patients With Persistent or Recurrent Cancer of the Cervix                                                | Completed | Cervical Squamous Cell Carcinoma Recurrent Cervical Cancer                                                                                                                                    | Biological: bevacizumab Other: laboratory biomarker analysis                                                   | Progression-free Survival Greater Than 6 Months Maximum Severity of Each Adverse Event Per Patient, Graded According to Common Toxicity Criteria Version 2.0 Tumor Response Overall Survival Duration of Progression-free Survival Performance Status Age                                                                     | Phase 2         | 50  | 2-Apr     | 24-Jul-19 |
| VEGF inhibitor | NCT01067469 | Standard Dose Bevacizumab Versus Low Dose Bevacizumab Plus Lomustine (CCNU) for Recurrent Glioblastoma Multiforme (GBM)           | Completed | Brain Cancer Glioblastoma                                                                                                                                                                     | Drug: Standard Dose Bevacizumab Drug: Low Dose Bevacizumab Drug: Lomustine                                     | Progression free survival (PFS)                                                                                                                                                                                                                                                                                               | Phase 2         | 83  | 10-Jan    | 31-Oct-16 |
| VEGF inhibitor | NCT00118235 | Cisplatin, Irinotecan, and Bevacizumab, in Treating Patients With Small Cell Lung Cancer                                          | Completed | Extensive Stage Small Cell Lung Cancer                                                                                                                                                        | Drug: cisplatin Drug: irinotecan hydrochloride Biological: bevacizumab Other: laboratory biomarker             | Survival time Failure-free survival Frequency of toxicity, tabulated by the most severe occurrence                                                                                                                                                                                                                            | Phase 2         | 72  | 4-Dec     | 17-Jun-14 |
| VEGF inhibitor | NCT02802098 | Abrogation of Chronic Monoclonal Antibody Treatment-induced T-cell Exhaustion With DURVALUMAB in Advanced HER-2 Negative Breast   | Completed | Metastatic Breast Cancer Bevacizumab-alone Maintenance Treatment Progression                                                                                                                  | Drug: Durvalumab Drug: Bevacizumab                                                                             | Changes Immunodynamics factors: kynurenine, prostaglandin, tryptophan levels T-cell exhaustion parameters T-cell exhaustion reversion Number of participants with treatment-related adverse events as assessed by CTCAE v4.0                                                                                                  | Early Phase 1   | 25  | 16-May    | 23-Jul-19 |
| VEGF inhibitor | NCT00980239 | HAI Irinotecan + IV Bevacizumab, Bevacizumab & Oxaliplatin or Bevacizumab & Cetuximab in Advanced Cancers Metastatic to Liver     | Completed | Liver Cancer Advanced Cancer                                                                                                                                                                  | Drug: Irinotecan Drug: Bevacizumab Drug: Oxaliplatin Drug: Cetuximab                                           | Maximum Tolerated Doses (MTDs) Dose-limiting toxicities (DLTs)                                                                                                                                                                                                                                                                | Phase 1         | 115 | 9-Sep     | 11-Nov-15 |
| VEGF inhibitor | NCT00079040 | Cisplatin, Etoposide, and Bevacizumab in Treating Patients With Previously Untreated Extensive Stage Small Cell Lung Cancer       | Completed | Extensive Stage Small Cell Lung Cancer                                                                                                                                                        | Drug: cisplatin Drug: etoposide Biological: bevacizumab Other: laboratory biomarker analysis                   | Percentage of Participants Alive and Progression-free (PF) at 6 Months Overall Survival Best Objective Response                                                                                                                                                                                                               | Phase 2         | 65  | 6-Jan     | 14-May-14 |
| VEGF inhibitor | NCT00242502 | Efficacy and Safety Study of Bevacizumab and Erlotinib to Treat Primary Liver Cancer That Cannot be                               | Completed | Hepatocellular Carcinoma Liver Cancer                                                                                                                                                         | Drug: Bevacizumab (Avastin) Drug: Erlotinib                                                                    | Progression-free Survival (PFS) Rate                                                                                                                                                                                                                                                                                          | Phase 2         | 62  | 5-Oct     | 6-May-13  |
| VEGF inhibitor | NCT00368875 | Phase I-II Study of Vorinostat, Paclitaxel, and Bevacizumab in Metastatic Breast Cancer                                           | Completed | Male Breast Cancer Stage IIIB Breast Cancer Stage IIIC Breast Cancer Stage IV Breast Cancer                                                                                                   | Drug: vorinostat Drug: paclitaxel Biological: bevacizumab                                                      | Recommended Phase II Dose as Assessed by NCI Common Terminology Criteria for Adverse Events (CTCAE) Version 3.0 (Phase I) Objective Response Rate (CR + PR) Progression-free Survival (PFS) Time to Treatment Failure (TTF) Overall                                                                                           | Phase 1 Phase 2 | 54  | 6-Jul     | 5-Nov-15  |
| VEGF inhibitor | NCT01286753 | A Study of Vemurafenib (RO5185426) in Participants With Metastatic or Unresectable Papillary Thyroid Cancer Positive for the BRAF | Completed | Neoplasms                                                                                                                                                                                     | Drug: Vemurafenib                                                                                              | Best Overall Response Rate in TKI-Naive Participants Best Overall Response Rate in TKI-Experienced Participants Clinical Benefit Rate Duration of Response Progression-Free Survival Overall Survival Percentage of Participants With Adverse Events Pharmacokinetics of Vemurafenib: Area Under the Concentration-Time Curve | Phase 2         | 51  | 11-Jun    | 7-Sep-16  |
| VEGF inhibitor | NCT00409565 | A Phase II Trial of Cetuximab and Bevacizumab in Patients With Recurrent or Metastatic Head and                                   | Completed | Head and Neck Cancer Squamous Cell Carcinoma                                                                                                                                                  | Drug: Cetuximab Drug: Bevacizumab                                                                              | Objective Response Rate (ORR) Progression-free Survival (PFS) Overall Survival (OS) Change in Serum Cytokine Concentrations Disease Control Rate (DCR) ((Clinical Benefit Rate (CBR))                                                                                                                                         | Phase 2         | 48  | 6-Sep     | 20-Oct-17 |
| VEGF inhibitor | NCT00941499 | Hepatic Arterial Infusion Oxaliplatin + 5FU, Leucovorin, and Bevacizumab +/- Cetuximab                                            | Completed | Advanced Cancers                                                                                                                                                                              | Drug: HAI Oxaliplatin Drug: 5-FU Drug: Bevacizumab Drug: Cetuximab Drug: Leucovorin                            | Maximum Tolerated Dose (MTD) and Dose Limiting Toxicity (DLT) of Intra-Arterial Hepatic Oxaliplatin Anti-Tumor Efficacy                                                                                                                                                                                                       | Phase 1         | 140 | 9-Jul     | 18-Nov-15 |
| VEGF inhibitor | NCT00761644 | Doxil, Bevacizumab and Temozolomide Trial                                                                                         | Completed | Advanced Cancer                                                                                                                                                                               | Drug: Doxil Drug: Bevacizumab Drug: Temozolomide                                                               | Maximum tolerated doses (MTDs) and Dose-limiting toxicities (DLTs) Anti-Tumor Efficacy of Drug Combination                                                                                                                                                                                                                    | Phase 1         | 200 | 21-Aug-08 | 11-Apr-19 |
| VEGF inhibitor | NCT01083368 | Temozolomide and Bevacizumab in Hormone-Resistant Metastatic Prostate Cancer That Did Not Respond to Chemotherapy                 | Completed | Prostate Cancer                                                                                                                                                                               | Drug: temozolomide Biological: bevacizumab Genetic: polymorphism analysis Other: laboratory biomarker analysis | Maximum Tolerated Dose (MTD) of Temozolomide (Phase I) Objective Response (Dose Level 2) Time to Clinical Progression Overall Survival Number of Patients With Toxicity as Assessed by CTCAE v3.0 (Common Toxicity Criteria for Adverse Effects)                                                                              | Phase 1 Phase 2 | 22  | 9-Jan     | 21-Aug-19 |
| VEGF inhibitor | NCT00324870 | Vorinostat and Bevacizumab in Treating Patients With Unresectable or Metastatic Kidney Cancer                                     | Completed | Clear Cell Renal Cell Carcinoma Recurrent Renal Cell Cancer Stage III Renal Cell Cancer Stage IV Renal Cell Cancer                                                                            | Drug: vorinostat Drug: bevacizumab                                                                             | Progression-free Survival Assessed by Response Evaluation Criteria for Solid Tumors (RECIST) (Phase II)                                                                                                                                                                                                                       | Phase 1 Phase 2 | 37  | 6-Feb     | 13-Jan-16 |
| VEGF inhibitor | NCT00365391 | Bevacizumab and Erlotinib in Treating Patients With Advanced Liver Cancer                                                         | Completed | Adult Primary Hepatocellular Carcinoma Advanced Adult Primary Liver Cancer Localized Unresectable Adult Primary Liver Cancer Recurrent Adult Primary Liver                                    | Biological: bevacizumab Drug: erlotinib hydrochloride                                                          | Number of Patients With Confirmed Tumor Response Defined to be Either a Complete Response (CR) or Partial Response (PR) Survival Time Time to Disease Progression Duration of Response Time to Treatment Failure                                                                                                              | Phase 2         | 27  | 6-Aug     | 9-Jul-15  |
| VEGF inhibitor | NCT00450255 | VEGF Trap in Treating Patients With Recurrent Stage III or Stage IV Melanoma That Cannot Be Removed by Surgery                    | Completed | Ciliary Body and Choroid Melanoma, Medium/Large Size Extraocular Extension Melanoma Iris Melanoma Metastatic Intraocular Melanoma Recurrent Intraocular Melanoma Recurrent Melanoma Stage III | Biological: ziv-aflibercept Other: pharmacological study                                                       | Objective Response Rate (CR + PR) 4 Month Progression-free Survival Overall Survival Number of Participants With Toxicities Impact of the VEGF Trap Therapy on Laboratory Correlates                                                                                                                                          | Phase 2         | 41  | 7-Jun     | 24-May-18 |

|                |             |                                                                                                                                                                                                                                       |           |                                                                                                                                                                                                                                                                                         |                                                                                                                                 |                                                                                                                                                                                                                                                                                                                                                                                                                                                                                                                                                                                                                                                                                                                                                                               |                 |     |           |           |
|----------------|-------------|---------------------------------------------------------------------------------------------------------------------------------------------------------------------------------------------------------------------------------------|-----------|-----------------------------------------------------------------------------------------------------------------------------------------------------------------------------------------------------------------------------------------------------------------------------------------|---------------------------------------------------------------------------------------------------------------------------------|-------------------------------------------------------------------------------------------------------------------------------------------------------------------------------------------------------------------------------------------------------------------------------------------------------------------------------------------------------------------------------------------------------------------------------------------------------------------------------------------------------------------------------------------------------------------------------------------------------------------------------------------------------------------------------------------------------------------------------------------------------------------------------|-----------------|-----|-----------|-----------|
| VEGF inhibitor | NCT00733408 | Nab-Paclitaxel and Bevacizumab Followed By Bevacizumab and Erlotinib in Metastatic Breast Cancer                                                                                                                                      | Completed | Estrogen Receptor-negative Breast Cancer HER2-negative Breast Cancer Progesterone Receptor-negative Breast Cancer Recurrent Breast Cancer Stage IV Breast Cancer Triple-negative Breast Cancer                                                                                          | Drug: paclitaxel albumin-stabilized nanoparticle formulation Biological: bevacizumab Drug: erlotinib hydrochloride              | Progression-free Survival (PFS) Overall Survival Percentage of Participants With Response Incidence of Adverse Events as Assessed by National Cancer Institute CTCAE Version 3.0 EGFR and SPARC Expression in the Primary Tumor Changes in Levels of Circulating Tumor Cells Changes in Levels of Circulating Endothelial Cells                                                                                                                                                                                                                                                                                                                                                                                                                                               | Phase 2         | 59  | 23-Apr-08 | 4-Dec-18  |
| VEGF inhibitor | NCT00098787 | Bevacizumab and Oxaliplatin Combined With Irinotecan or Leucovorin and Fluorouracil in Treating Patients With Metastatic or                                                                                                           | Completed | Colorectal Cancer                                                                                                                                                                                                                                                                       | Biological: bevacizumab Drug: fluorouracil Drug: irinotecan hydrochloride Drug: leucovorin calcium Drug: Oxaliplatin            | Objective Response Rate Progression-Free Survival (PFS) Overall Survival (OS)                                                                                                                                                                                                                                                                                                                                                                                                                                                                                                                                                                                                                                                                                                 | Phase 2         | 247 | 5-Jul     | 21-Aug-18 |
| VEGF inhibitor | NCT00077298 | Bevacizumab and Cetuximab With or Without Irinotecan in Treating Patients With Irinotecan-Refractory Metastatic Colorectal Cancer                                                                                                     | Completed | Recurrent Colon Cancer Recurrent Rectal Cancer Stage IVA Colon Cancer Stage IVA Rectal Cancer Stage IVB Colon Cancer Stage IVB Rectal Cancer                                                                                                                                            | Biological: cetuximab Biological: bevacizumab Drug: irinotecan hydrochloride Other: laboratory biomarker analysis               | Time to tumor progression Objective response rate Overall survival                                                                                                                                                                                                                                                                                                                                                                                                                                                                                                                                                                                                                                                                                                            | Phase 2         | 70  | 3-Dec     | 15-Apr-15 |
| VEGF inhibitor | NCT03169335 | Efficacy and Safety of QL1101 and Avastin <sup>ip</sup> Respectively Combined With Paclitaxel and Carboplatin in the First-line Treatment of Non-squamous Non-small Cell Lung                                                         | Completed | Non-squamous Non-small Cell Lung Cancer                                                                                                                                                                                                                                                 | Drug: QL1101 Drug: Avastin <sup>ip</sup>  Drug: Paclitaxel Drug: Carboplatin                                                    | Objective response rate Disease control rate Overall survival (OS) Progression-free survival (PFS) Treatment-emergent adverse events                                                                                                                                                                                                                                                                                                                                                                                                                                                                                                                                                                                                                                          | Phase 3         | 535 | 28-Mar-17 | 24-Aug-18 |
| VEGF inhibitor | NCT00520013 | Avastin +/- Erlotinib Consolidation Chemotherapy After Carboplatin, Paclitaxel, and Avastin (CTA) Induction Therapy for Advanced Ovarian, Fallopian Tube, Primary Peritoneal Cancer & Papillary Serous or Clear Cell Mullerian Tumors | Completed | Ovarian Cancer Fallopian Tube Cancer Primary Peritoneal Cancer Papillary Serous Mullerian Tumor Clear Cell Mullerian Tumor                                                                                                                                                              | Drug: bevacizumab Drug: erlotinib Drug: paclitaxel Drug: carboplatin                                                            | Consolidation Progression-Free Survival Consolidation Treatment-related Toxicity Rate Consolidation Objective Response Rate                                                                                                                                                                                                                                                                                                                                                                                                                                                                                                                                                                                                                                                   | Phase 2         | 60  | 7-Aug     | 27-Jul-18 |
| VEGF inhibitor | NCT01183663 | Lenalidomide in Combination With Bevacizumab, Sorafenib, Temsirolimus, or 5-Fluorouracil, Leucovorin, Oxaliplatin (FOLFOX)                                                                                                            | Completed | Advanced Cancers                                                                                                                                                                                                                                                                        | Drug: Lenalidomide Drug: Bevacizumab Drug: Sorafenib Drug: Temsirolimus Drug: Oxaliplatin Drug: Leucovorin Drug: 5-fluorouracil | Maximum Tolerated Dose (MTD) of Lenalidomide in Combination With Bevacizumab, Sorafenib, Temsirolimus, or 5-Fluorouracil, Leucovorin, Oxaliplatin (FOLFOX) Tumor Response                                                                                                                                                                                                                                                                                                                                                                                                                                                                                                                                                                                                     | Phase 1         | 180 | 10-Aug    | 3-Jun-16  |
| VEGF inhibitor | NCT01047293 | RAD001, FOLFOX and Bevacizumab in Treatment of Colorectal Carcinoma                                                                                                                                                                   | Completed | Colorectal Cancer                                                                                                                                                                                                                                                                       | Drug: RAD001 Drug: FOLFOX Drug: Bevacizumab                                                                                     | Progression Free Survival at Six Months Evaluate Safety of the Combination at a Daily Dosing of 2.5mg RAD001, 5 mg RAD001 or 10 mg RAD001 (Phase 1 Part)                                                                                                                                                                                                                                                                                                                                                                                                                                                                                                                                                                                                                      | Phase 1 Phase   | 47  | 10-May    | 4-Apr-17  |
| VEGF inhibitor | NCT00619424 | A Phase I Study Of Pazopanib With Either Erlotinib Or Pemetrexed In Patients With Advanced Solid Tumors                                                                                                                               | Completed | Lung Cancer, Non-Small Cell                                                                                                                                                                                                                                                             | Drug: pazopanib Drug: erlotinib Drug: pemetrexed                                                                                | MTD regimen for each combination regimen in each arm of the study as determined by an evaluation of AEs and changes in laboratory values. The MTD = highest dosing regimen that results in dose limiting toxicity in <= 1 of 6 patients. Pharmacokinetic endpoints will be AUC, Cmax, tmax, and t1/2 of pazopanib, erlotinib, and pemetrexed and clearance of pemetrexed. Tumor response using RECIST criteria. Levels of circulating cytokine and angiogenic factors (CAF) biomarkers (such as IL-6, IL-10, VEGF, sVEGFR-2) in plasma will be determined. Pharmacogenetics Endpoint: Genetic variants in candidate genes in                                                                                                                                                  | Phase 1         | 58  | 15-Nov-07 | 17-Nov-17 |
| VEGF inhibitor | NCT00366457 | Gemcitabine, Bevacizumab and Erlotinib in Pancreatic Cancer                                                                                                                                                                           | Completed | Pancreatic Cancer Adenocarcinoma of the Pancreas                                                                                                                                                                                                                                        | Drug: Bevacizumab Drug: Erlotinib Drug: Gemcitabine                                                                             | Time to Tumor Progression Response Rate Toxicity Profile Overall Survival                                                                                                                                                                                                                                                                                                                                                                                                                                                                                                                                                                                                                                                                                                     | Phase 2         | 32  | 6-Aug     | 15-May-17 |
| VEGF inhibitor | NCT00819780 | PEAK: Panitumumab Plus mFOLFOX6 vs. Bevacizumab Plus mFOLFOX6 for First Line Treatment of Metastatic Colorectal Cancer (mCRC) Patients With Wild-Type Kirsten Rat Sarcoma-2 Virus (KRAS) Tumors                                       | Completed | Colon Cancer Colorectal Cancer Rectal Cancer Metastatic Colorectal Cancer                                                                                                                                                                                                               | Drug: Panitumumab Drug: Bevacizumab Drug: mFOLFOX6                                                                              | Progression-free Survival (PFS) Overall Survival Percentage of Participants With an Objective Response Duration of Response Time to Disease Progression Time to Initial Objective Response Resection Rate Progression-free Survival (PFS) in Participants With Wild-type Rat Sarcoma Viral Oncogene Homolog (RAS) Progression-free Survival (PFS) in Participants With Wild-type RAS / V-raf Murine Sarcoma Viral Oncogene Homolog B1 (BRAF) Overall Survival in Participants With Wild-type RAS Overall Survival in Participants With Wild-type RAS / BRAF Percentage of Participants With an Objective Response for Participants With Wild-type RAS Percentage of Participants With an Objective Response for Participants With Wild-type RAS / BRAF Number of Participants | Phase 2         | 285 | 24-Apr-09 | 21-Aug-19 |
| VEGF inhibitor | NCT01916447 | A Phase I Study of TAS-102 in Patients With Advanced Gastrointestinal Tumors.                                                                                                                                                         | Completed | Advanced Gastrointestinal Tumors                                                                                                                                                                                                                                                        | Drug: TAS-102 Drug: CPT-11 Drug: Bevacizumab                                                                                    | Determine maximum tolerated dose Safety monitoring including adverse events, vital signs, and laboratory assessments Investigate the safety of TAS-102 and CPT-11 at the MTD administered in combination with Bevacizumab (5 mg/kg IV). Investigate the clinical pharmacokinetics (PK) of TAS-102, CPT-11, and their metabolites. Document any preliminary antitumor activity of TAS-102 administered in combination with CPT-11 and in                                                                                                                                                                                                                                                                                                                                       | Phase 1         | 65  | 13-Sep    | 6-Oct-17  |
| VEGF inhibitor | NCT00329719 | Sorafenib Tosylate and Temsirolimus in Treating Patients With Recurrent Glioblastoma                                                                                                                                                  | Completed | Adult Glioblastoma Adult Gliosarcoma Recurrent Adult Brain Neoplasm                                                                                                                                                                                                                     | Procedure: Conventional Surgery Other: Laboratory Biomarker Analysis Drug: Sorafenib Tosylate Drug: Temsirolimus                | Progression-free Survival Overall Survival Objective Response, as Determined by a Neurological Exam, MRI, and/or CT Measurement                                                                                                                                                                                                                                                                                                                                                                                                                                                                                                                                                                                                                                               | Phase 1 Phase 2 | 115 | 24-Mar-06 | 16-Oct-18 |
| VEGF inhibitor | NCT00390234 | Ziv-aflibercept in Treating Patients With Locally Advanced, Unresectable, or Metastatic Gynecologic Soft Tissue Sarcoma                                                                                                               | Completed | Fallopian Tube Cancer Female Reproductive Cancer Ovarian Carcinosarcoma Ovarian Sarcoma Recurrent Ovarian Epithelial Cancer Recurrent Uterine Sarcoma Stage III Ovarian Epithelial Cancer Stage III Uterine Sarcoma Stage IV Ovarian Epithelial Cancer Stage IV Uterine Sarcoma Uterine | Drug: ziv-aflibercept                                                                                                           | Objective Response Rate, Evaluated According to the RECIST Criteria Incidence of Disease Stabilization, as Measured by Progression-free Survival at 6 Months (Leiomyosarcoma Group) Incidence of Disease Stabilization, as Measured by Progression-free Survival at 6 Months (Carcinosarcoma Group) Survival (Leiomyosarcoma Group) Survival (Carcinosarcoma Group)                                                                                                                                                                                                                                                                                                                                                                                                           | Phase 2         | 63  | 6-Sep     | 7-Dec-15  |

|                |             |                                                                                                                          |           |                                                                                                                                                                                                                                                         |                                                                                                                                                                                                                                                                                                                                                                                                                                                                                           |                                                                                                                                                                                                                                                                                                                                                                                                                                                                                                                                                                                                                                                                                                                                                                                                                                                                                                                                                                                                                                                                                                                                                                                                                                                                                                                                                                                                                                                                                                                                                                                                                                                                                                                                                                                                                                                                                                                                                                                                                                                                                                                                                                                                                                                                                                                                                                                                                                                                                                                                                                                                                                   |                 |     |           |           |
|----------------|-------------|--------------------------------------------------------------------------------------------------------------------------|-----------|---------------------------------------------------------------------------------------------------------------------------------------------------------------------------------------------------------------------------------------------------------|-------------------------------------------------------------------------------------------------------------------------------------------------------------------------------------------------------------------------------------------------------------------------------------------------------------------------------------------------------------------------------------------------------------------------------------------------------------------------------------------|-----------------------------------------------------------------------------------------------------------------------------------------------------------------------------------------------------------------------------------------------------------------------------------------------------------------------------------------------------------------------------------------------------------------------------------------------------------------------------------------------------------------------------------------------------------------------------------------------------------------------------------------------------------------------------------------------------------------------------------------------------------------------------------------------------------------------------------------------------------------------------------------------------------------------------------------------------------------------------------------------------------------------------------------------------------------------------------------------------------------------------------------------------------------------------------------------------------------------------------------------------------------------------------------------------------------------------------------------------------------------------------------------------------------------------------------------------------------------------------------------------------------------------------------------------------------------------------------------------------------------------------------------------------------------------------------------------------------------------------------------------------------------------------------------------------------------------------------------------------------------------------------------------------------------------------------------------------------------------------------------------------------------------------------------------------------------------------------------------------------------------------------------------------------------------------------------------------------------------------------------------------------------------------------------------------------------------------------------------------------------------------------------------------------------------------------------------------------------------------------------------------------------------------------------------------------------------------------------------------------------------------|-----------------|-----|-----------|-----------|
| VEGF inhibitor | NCT00454649 | Investigational Agent AG-013736 In Combinations With Standard Of Care Treatments For Patient's With Advanced Solid Tumor | Completed | Neoplasms                                                                                                                                                                                                                                               | Drug: Axitinib + Paclitaxel + Carboplatin (Cohort 1) Drug: Axitinib + Paclitaxel + Carboplatin (Cohort 2) Drug: Axitinib + Paclitaxel + Carboplatin (Cohort 3) Drug: Axitinib + Paclitaxel (Cohort 4) Drug: Axitinib + Docetaxel + Carboplatin (Cohort 4a) Drug: Axitinib + Docetaxel (Cohort 5) Drug: Axitinib + Capecitabine (Cohort 6) Drug: Axitinib + Capecitabine (Cohort 7) Drug: Axitinib + Gemcitabine + Cisplatin (Cohort 8) Drug: Axitinib + Pemetrexed + Cisplatin (Cohort 9) | Maximum Tolerated Dose (MTD) of Axitinib (AG-013736) in Combination With Chemotherapy Area Under the Curve From Time Zero to Time 24 Hours [AUC (0-24)] for Axitinib (AG-013736) Maximum Observed Plasma Concentration (Cmax) for Axitinib (AG-013736) Minimum Observed Plasma Trough Concentration (Cmin) for Axitinib (AG-013736) Apparent Oral Clearance (CL/F) for Axitinib (AG-013736) Plasma Decay Half Life (t1/2) for Axitinib (AG-013736) Area Under the Curve From Time Zero to Extrapolated Infinite Time [AUC (0-∞)] for Paclitaxel Maximum Observed Plasma Concentration (Cmax) for Paclitaxel Minimum Observed Plasma Trough Concentration (Cmin) for Paclitaxel Plasma Clearance (CL) for Paclitaxel Plasma Decay Half Life (t1/2) for Paclitaxel Area Under the Curve From Time Zero to Extrapolated Infinite Time [AUC (0-∞)] for Docetaxel Maximum Observed Plasma Concentration (Cmax) for Docetaxel Minimum Observed Plasma Trough Concentration (Cmin) for Docetaxel Plasma Clearance (CL) for Docetaxel Plasma Decay Half Life (t1/2) for Docetaxel Area Under the Curve From Time Zero to Time 24 Hours [AUC (0-24)] for Capecitabine Maximum Observed Plasma Concentration (Cmax) for Capecitabine Minimum Observed Plasma Trough Concentration (Cmin) for Capecitabine Apparent Oral Clearance (CL/F) for Capecitabine Plasma Decay Half Life (t1/2) for Capecitabine Area Under the Curve From Time Zero to Extrapolated Infinite Time [AUC (0-∞)] for Gemcitabine Maximum Observed Plasma Concentration (Cmax) for Gemcitabine Minimum Observed Plasma Trough Concentration (Cmin) for Gemcitabine Plasma Clearance (CL) for Gemcitabine Plasma Decay Half Life (t1/2) for Gemcitabine Area Under the Curve From Time Zero to Extrapolated Infinite Time [AUC (0-∞)] for Carboplatin Maximum Observed Plasma Concentration (Cmax) for Carboplatin Minimum Observed Plasma Trough Concentration (Cmin) for Carboplatin Plasma Clearance (CL) for Carboplatin Plasma Decay Half Life (t1/2) for Carboplatin Area Under the Curve From Time Zero to Time 8 Hours [AUC (0-8)] for Cisplatin Maximum Observed Plasma Concentration (Cmax) for Cisplatin Minimum Observed Plasma Trough Concentration (Cmin) for Cisplatin Plasma Clearance (CL) for Cisplatin Plasma Decay Half Life (t1/2) for Cisplatin Area Under the Curve From Time Zero to Time 24 Hours [AUC (0-24)] for Pemetrexed Maximum Observed Plasma Concentration (Cmax) for Pemetrexed Minimum Observed Plasma Trough Concentration (Cmin) for Pemetrexed Plasma Clearance (CL) for Pemetrexed Plasma Decay Half Life (t1/2) for Pemetrexed | Phase 1         | 102 | 5-Dec     | 4-Apr-12  |
| VEGF inhibitor | NCT00471536 | Pazopanib in Treating Patients With Metastatic Urothelial Cancer                                                         | Completed | Distal Urethral Cancer Proximal Urethral Cancer Recurrent Bladder Cancer Recurrent Transitional Cell Cancer of the Renal Pelvis and Ureter Recurrent Urethral Cancer Stage IV Bladder Cancer Transitional Cell Carcinoma of the Bladder Urethral Cancer | Drug: pazopanib hydrochloride                                                                                                                                                                                                                                                                                                                                                                                                                                                             | Best Tumor Response (Complete [CR] or Partial Response [PR] by Response Evaluation Criteria in Solid Tumors [RECIST]) Adverse Events Using the National Cancer Institute (NCI) Common Terminology Criteria for Adverse Events (CTCAE) Version 3.0 Confirmed Tumor Response (CR and PR) Duration of Response Time to Disease Progression Survival Time                                                                                                                                                                                                                                                                                                                                                                                                                                                                                                                                                                                                                                                                                                                                                                                                                                                                                                                                                                                                                                                                                                                                                                                                                                                                                                                                                                                                                                                                                                                                                                                                                                                                                                                                                                                                                                                                                                                                                                                                                                                                                                                                                                                                                                                                             | Phase 2         | 19  | 8-Aug     | 30-May-14 |
| VEGF inhibitor | NCT00369590 | VEGF Trap in Treating Patients With Recurrent Malignant Gliomas That Did Not Respond to Temozolomide                     | Completed | Adult Anaplastic Astrocytoma Adult Anaplastic Oligodendroglioma Adult Giant Cell Glioblastoma Adult Gliosarcoma Recurrent Adult Brain Tumor                                                                                                             | Biological: ziv-afibercept Other: pharmacological study Other: laboratory biomarker analysis                                                                                                                                                                                                                                                                                                                                                                                              | Progression-free Survival (PFS) at 6 Months Safety Profile - Toxicities Safety Profile - Events That Discontinued Treatment Response Rate Associated With VEGF Trap Therapy Defined as Proportions of Patients Experiencing Complete or Partial Response Progression Free Survival (PFS) Rate for Subjects With Radiographic                                                                                                                                                                                                                                                                                                                                                                                                                                                                                                                                                                                                                                                                                                                                                                                                                                                                                                                                                                                                                                                                                                                                                                                                                                                                                                                                                                                                                                                                                                                                                                                                                                                                                                                                                                                                                                                                                                                                                                                                                                                                                                                                                                                                                                                                                                      | Phase 2         | 58  | 6-Aug     | 2-Oct-15  |
| VEGF inhibitor | NCT00094094 | Anti-angiogenesis Agent AG-013736 in Patients With Advanced Non-Small Cell Lung Cancer                                   | Completed | Lung Neoplasms Carcinoma, Non-small Cell Lung                                                                                                                                                                                                           | Drug: axitinib                                                                                                                                                                                                                                                                                                                                                                                                                                                                            | Percentage of Participants With Objective Response (OR) Progression-Free Survival (PFS) Duration of Response (DR) Overall Survival (OS)                                                                                                                                                                                                                                                                                                                                                                                                                                                                                                                                                                                                                                                                                                                                                                                                                                                                                                                                                                                                                                                                                                                                                                                                                                                                                                                                                                                                                                                                                                                                                                                                                                                                                                                                                                                                                                                                                                                                                                                                                                                                                                                                                                                                                                                                                                                                                                                                                                                                                           | Phase 2         | 32  | 5-Feb     | 26-Jun-12 |
| VEGF inhibitor | NCT00356889 | Bevacizumab and Erlotinib Hydrochloride in Treating Patients With Metastatic or Unresectable Biliary Tumors              | Completed | Cholangiocarcinoma of the Extrahepatic Bile Duct Cholangiocarcinoma of the Gallbladder Gastrointestinal Cancer Recurrent Extrahepatic Bile Duct Cancer Recurrent Gallbladder Cancer Unresectable Extrahepatic Bile Duct                                 | Drug: erlotinib hydrochloride Biological: bevacizumab                                                                                                                                                                                                                                                                                                                                                                                                                                     | Number of Confirmed Tumor Responses Survival Time Time to Disease Progression Duration of Response                                                                                                                                                                                                                                                                                                                                                                                                                                                                                                                                                                                                                                                                                                                                                                                                                                                                                                                                                                                                                                                                                                                                                                                                                                                                                                                                                                                                                                                                                                                                                                                                                                                                                                                                                                                                                                                                                                                                                                                                                                                                                                                                                                                                                                                                                                                                                                                                                                                                                                                                | Phase 2         | 56  | 6-May     | 28-May-14 |
| VEGF inhibitor | NCT01656304 | Bevacizumab in Treating Patients With Relapsed Prostate Cancer That Did Not Respond to Hormone Therapy                   | Completed | Adenocarcinoma of the Prostate Recurrent Prostate Cancer Stage I Prostate Cancer Stage IIA Prostate Cancer Stage IIB Prostate Cancer Stage III Prostate Cancer                                                                                          | Biological: bevacizumab Other: laboratory biomarker analysis                                                                                                                                                                                                                                                                                                                                                                                                                              | PSA Response Rate With Bevacizumab Therapy in Androgen Independent Non-metastatic Prostate Cancer Toxicities Associated With Bevacizumab Therapy Time to PSA Progression (TTPP) Overall Survival of Androgen Independent Non-metastatic Prostate Cancer Patients Treated With Bevacizumab The Change in PSA Velocity With Bevacizumab Therapy in Androgen Independent Non-metastatic Prostate Cancer Time to                                                                                                                                                                                                                                                                                                                                                                                                                                                                                                                                                                                                                                                                                                                                                                                                                                                                                                                                                                                                                                                                                                                                                                                                                                                                                                                                                                                                                                                                                                                                                                                                                                                                                                                                                                                                                                                                                                                                                                                                                                                                                                                                                                                                                      | Phase 2         | 16  | 7-May     | 31-Jul-18 |
| VEGF inhibitor | NCT00074308 | Imatinib Mesylate and Bevacizumab in Treating Patients With Advanced Melanoma or Other Advanced Cancers                  | Completed | Recurrent Melanoma Stage III Melanoma Stage IV Melanoma Unspecified Adult Solid Tumor, Protocol Specific                                                                                                                                                | Drug: imatinib mesylate Biological: bevacizumab Other: pharmacological study Other: laboratory biomarker analysis                                                                                                                                                                                                                                                                                                                                                                         | MTD, Defined as One Dose Level Below the Dose That Induced DLT in at Least One Third of Patients at a Dose Level, Graded According to NCI CTCAE Version 3.0 (Phase I) Progression-free Survival at 16 Weeks (Phase II) Response Rate at 8 Weeks, Evaluated Using RECIST (Phase II) Overall Survival (Phase II)                                                                                                                                                                                                                                                                                                                                                                                                                                                                                                                                                                                                                                                                                                                                                                                                                                                                                                                                                                                                                                                                                                                                                                                                                                                                                                                                                                                                                                                                                                                                                                                                                                                                                                                                                                                                                                                                                                                                                                                                                                                                                                                                                                                                                                                                                                                    | Phase 1 Phase 2 | 40  | 3-Oct     | 20-Jun-18 |
| VEGF inhibitor | NCT00378703 | Bevacizumab, Sorafenib Tosylate, and Temsirolimus in Treating Patients With Metastatic Kidney Cancer                     | Completed | Clear Cell Renal Cell Carcinoma Recurrent Renal Cell Carcinoma Stage IV Renal Cell Cancer AJCC v7                                                                                                                                                       | Biological: Bevacizumab Other: Laboratory Biomarker Analysis Other: Pharmacological Study Drug: Sorafenib Tosylate Drug: Temsirolimus                                                                                                                                                                                                                                                                                                                                                     | Progression-free Survival (PFS) Proportion of Patients With Stable Disease at 6 Months Overall Survival Objective Response Rate                                                                                                                                                                                                                                                                                                                                                                                                                                                                                                                                                                                                                                                                                                                                                                                                                                                                                                                                                                                                                                                                                                                                                                                                                                                                                                                                                                                                                                                                                                                                                                                                                                                                                                                                                                                                                                                                                                                                                                                                                                                                                                                                                                                                                                                                                                                                                                                                                                                                                                   | Phase 2         | 361 | 14-Sep-07 | 14-Nov-18 |
| VEGF inhibitor | NCT00015951 | Bevacizumab, Cytarabine, and Mitoxantrone on Treating Patients With Hematologic Cancers                                  | Completed | Leukemia Myelodysplastic Syndromes                                                                                                                                                                                                                      | Biological: bevacizumab Drug: cytarabine Drug: mitoxantrone hydrochloride                                                                                                                                                                                                                                                                                                                                                                                                                 |                                                                                                                                                                                                                                                                                                                                                                                                                                                                                                                                                                                                                                                                                                                                                                                                                                                                                                                                                                                                                                                                                                                                                                                                                                                                                                                                                                                                                                                                                                                                                                                                                                                                                                                                                                                                                                                                                                                                                                                                                                                                                                                                                                                                                                                                                                                                                                                                                                                                                                                                                                                                                                   | Phase 2         |     | 1-Apr     | 17-Oct-19 |
| VEGF inhibitor | NCT00022048 | Bevacizumab in Treating Patients With Myelodysplastic Syndrome                                                           | Completed | Leukemia Myelodysplastic Syndromes Myelodysplastic/Myeloproliferative                                                                                                                                                                                   | Biological: bevacizumab                                                                                                                                                                                                                                                                                                                                                                                                                                                                   |                                                                                                                                                                                                                                                                                                                                                                                                                                                                                                                                                                                                                                                                                                                                                                                                                                                                                                                                                                                                                                                                                                                                                                                                                                                                                                                                                                                                                                                                                                                                                                                                                                                                                                                                                                                                                                                                                                                                                                                                                                                                                                                                                                                                                                                                                                                                                                                                                                                                                                                                                                                                                                   | Phase 1 Phase 2 |     | 1-Aug     | 15-May-13 |

|                |             |                                                                                                                     |           |                                                                                                                                                                                                                                                                                                                                                                                                                                                                                                                         |                                                                                                                                                                                                  |                                                                                                                                                                                                                                                                                                                                                                                                                                                                                                                                                                                                                                                                                                                                                                                                                                                                                                                                                                                                                                                                                                                                                                                                                                                                                                                                                                                                                                                                                                                                                                                                                                                                                                                                                                                                                                                                                                                                                                                                                                                                                                                                                                                                                                                                                                                                                                                                                                                                                                                                                                                                                                                        |         |     |          |           |
|----------------|-------------|---------------------------------------------------------------------------------------------------------------------|-----------|-------------------------------------------------------------------------------------------------------------------------------------------------------------------------------------------------------------------------------------------------------------------------------------------------------------------------------------------------------------------------------------------------------------------------------------------------------------------------------------------------------------------------|--------------------------------------------------------------------------------------------------------------------------------------------------------------------------------------------------|--------------------------------------------------------------------------------------------------------------------------------------------------------------------------------------------------------------------------------------------------------------------------------------------------------------------------------------------------------------------------------------------------------------------------------------------------------------------------------------------------------------------------------------------------------------------------------------------------------------------------------------------------------------------------------------------------------------------------------------------------------------------------------------------------------------------------------------------------------------------------------------------------------------------------------------------------------------------------------------------------------------------------------------------------------------------------------------------------------------------------------------------------------------------------------------------------------------------------------------------------------------------------------------------------------------------------------------------------------------------------------------------------------------------------------------------------------------------------------------------------------------------------------------------------------------------------------------------------------------------------------------------------------------------------------------------------------------------------------------------------------------------------------------------------------------------------------------------------------------------------------------------------------------------------------------------------------------------------------------------------------------------------------------------------------------------------------------------------------------------------------------------------------------------------------------------------------------------------------------------------------------------------------------------------------------------------------------------------------------------------------------------------------------------------------------------------------------------------------------------------------------------------------------------------------------------------------------------------------------------------------------------------------|---------|-----|----------|-----------|
| VEGF inhibitor | NCT00655655 | Everolimus and Vatalanib in Treating Patients With Advanced Solid Tumors                                            | Completed | Gastrinoma Glucagonoma Insulinoma Metastatic Gastrointestinal Carcinoid Tumor Metastatic Pheochromocytoma Pancreatic Polypeptide Tumor Recurrent Gastrointestinal Carcinoid Tumor Recurrent Islet Cell Carcinoma Recurrent Melanoma Recurrent Neuroendocrine Carcinoma of the Skin Recurrent Non-small Cell Lung Cancer Recurrent Pheochromocytoma Recurrent Renal Cell Cancer Somatostatinoma Stage III Neuroendocrine Carcinoma of the Skin Stage IV Melanoma Stage IV Non-small Cell Lung Cancer Stage IV Renal Cell | Drug: everolimus Drug: vatalanib Other: pharmacological study Other: laboratory biomarker analysis Procedure: dynamic contrast-enhanced magnetic resonance imaging Procedure: ultrasound imaging | Maximum tolerated dose of everolimus and vatalanib (Cohort I) (Closed to enrollment as of 12/6/06) Toxicity associated with everolimus and vatalanib (Cohort I) (Closed to enrollment as of 12/6/06) Therapeutic antitumor activity of everolimus and vatalanib (Cohort I) (Closed to enrollment as of 12/6/06) Recommended phase II dose (RP2D) of everolimus and vatalanib (Cohort I) (Closed to enrollment as of 12/6/06) Biological activity and therapeutic antitumor activity of everolimus and vatalanib when given at the MTD/RPTD (Cohort II) Evaluation of pharmacogenetic, metabolic, and clinical markers that may predict hypertension induced by anti-VEGF therapy (Cohort II) Efficacy outcomes in patients with metastatic kidney cancer, neuroendocrine carcinoma, non-small cell lung cancer, or melanoma (Cohort II)                                                                                                                                                                                                                                                                                                                                                                                                                                                                                                                                                                                                                                                                                                                                                                                                                                                                                                                                                                                                                                                                                                                                                                                                                                                                                                                                                                                                                                                                                                                                                                                                                                                                                                                                                                                                                | Phase 1 | 96  | 4-Dec    | 17-Jan-18 |
| VEGF inhibitor | NCT01956669 | Pazopanib Paediatric Phase II Trial Children's Oncology Group (COG) in Solid Tumors                                 | Completed | Solid Tumours                                                                                                                                                                                                                                                                                                                                                                                                                                                                                                           | Drug: Pazopanib GW786034                                                                                                                                                                         | The investigator assessed objective response rate (ORR) in subjects' with tumors of primary interest The investigator assessed ORR for the tumor types of secondary interest. Incidence of toxicities of oral pazopanib Progression free survival (PFS) as assessed by the Investigator in subjects with relapsed or refractory solid tumors The time to progression (TTP) in subjects with relapsed or refractory solid tumors To determine the therapeutic activity (a confirmed complete or partial response or stable disease for at least 4 cycles) per cohort The relationship between tumor response and angiogenic cytokines. genotype/phenotype of VEGF or other members of the VEGF signaling pathway Pazopanib pharmacokinetic/pharmacodynamic relationships with biomarkers and clinical outcomes Composite of pharmacokinetic (PK) parameters of pazopanib after administration of the oral suspension Overall Survival (OS) Duration of response                                                                                                                                                                                                                                                                                                                                                                                                                                                                                                                                                                                                                                                                                                                                                                                                                                                                                                                                                                                                                                                                                                                                                                                                                                                                                                                                                                                                                                                                                                                                                                                                                                                                                         | Phase 2 | 154 | 8-Oct-14 | 10-Dec-19 |
| VEGF inhibitor | NCT00786669 | A Pilot Study of the Addition of Bevacizumab to VOIT Regimen for Relapsed/Refractory Pediatric Solid Tumors         | Completed | Solid Tumor                                                                                                                                                                                                                                                                                                                                                                                                                                                                                                             | Drug: Bevacizumab Drug: Temozolomide Drug: Vincristine Drug: Irinotecan Drug: Cefixime                                                                                                           | Define the toxicities of adding bevacizumab to the established VOIT regimen using cefixime to reduce irinotecan-associated diarrhea. Preliminarily define the antitumor activity of this drug combination within the confines of a small pilot trial. To assess the feasibility of collecting and analyzing serum DNA for methylation of the MGMT promotor. Compare free and total levels of VEGF in serum following treatment with bevacizumab.                                                                                                                                                                                                                                                                                                                                                                                                                                                                                                                                                                                                                                                                                                                                                                                                                                                                                                                                                                                                                                                                                                                                                                                                                                                                                                                                                                                                                                                                                                                                                                                                                                                                                                                                                                                                                                                                                                                                                                                                                                                                                                                                                                                                       | Phase 1 | 13  | 8-Oct    | 25-Feb-15 |
| VEGF inhibitor | NCT00101894 | Safety of AMG 706 Plus Panitumumab Plus Chemotherapy in the Treatment of Subjects With Metastatic Colorectal Cancer | Completed | Rectal Cancer Colon Cancer                                                                                                                                                                                                                                                                                                                                                                                                                                                                                              | Drug: FOLFOX-4 Drug: AMG 706 Biological: Panitumumab (Part 1a only) Drug: FOLFIRI                                                                                                                | Part 1a - The incidence of adverse events and clinical laboratory abnormalities defined as dose-limiting toxicities Part 1b - The incidence of adverse events and clinical laboratory abnormalities defined as dose-limiting toxicities Part 2 - The overall objective tumor response rate (complete and partial response) in subjects treated with AMG 706 (at the dose determined in Part 1b), with either the FOLFIRI or FOLFOX-4 chemotherapy regimen Part 1a - The PK of irinotecan (and its active metabolite SN38) when administered as a part of the FOLFIRI regimen with panitumumab and AMG 706 Part 1a - The PK of oxaliplatin when administered as a part of the FOLFOX-4 regimen with panitumumab and AMG 706 Part 1a - The objective tumor response rate (complete and partial response) throughout the study Part 1b - The incidence of adverse events and clinical laboratory abnormalities not defined as dose-limiting toxicities Part 1b - The PK of AMG 706 when administered with either the FOLFIRI or FOLFOX-4 chemotherapy regimen Part 1b - The PK of 5-FU when administered as a part of the FOLFIRI or FOLFOX-4 regimen with AMG 706 Part 2 - Duration of response: (Calculated for only those subjects who respond) Part 2 - Time-to-progression Part 1b - The PK of irinotecan (and its active metabolite SN38) when administered as a part of the FOLFIRI regimen with AMG 706 Part 1b- The PK of oxaliplatin when administered as a part of the FOLFOX-4 regimen with AMG 706 Part 1b - The objective tumor response rate (complete and partial response) throughout the study Part 2 - Overall survival Part 2 - The incidence of adverse events and clinical laboratory abnormalities Part 2 - The PK of AMG 706 when administered with either the FOLFIRI or FOLFOX-4 chemotherapy regimen (at a subset of the study centers with the capabilities to draw, ship and process PK samples) Exploratory - Potential biomarker development based on assessment of blood cells, tumor cells, and urine and the proposed mechanism of action of study drugs, and response Exploratory - The effects of genetic variation in drug metabolism genes, cancer genes, and drug target genes on subject response to investigational products (separate informed consent) Part 2 - Progression-free survival time Part 2 - Incidence of subjects undergoing resection of metastases for curative intent Part 1a - The incidence of adverse events and clinical laboratory abnormalities not defined as dose-limiting toxicities Part 1a - The PK of AMG 706 when administered with panitumumab and either the FOLFIRI or FOLFOX-4 | Phase 1 | 119 | 4-Dec    | 17-Sep-12 |
| VEGF inhibitor | NCT00113217 | Neoadjuvant Clinical Trial to Evaluate the Efficacy of Bevacizumab for Renal Cell Carcinoma                         | Completed | Renal Cell Carcinoma Kidney Cancer                                                                                                                                                                                                                                                                                                                                                                                                                                                                                      | Drug: Bevacizumab                                                                                                                                                                                | Progression Free Survival (PFS) Safety of Treatment                                                                                                                                                                                                                                                                                                                                                                                                                                                                                                                                                                                                                                                                                                                                                                                                                                                                                                                                                                                                                                                                                                                                                                                                                                                                                                                                                                                                                                                                                                                                                                                                                                                                                                                                                                                                                                                                                                                                                                                                                                                                                                                                                                                                                                                                                                                                                                                                                                                                                                                                                                                                    | Phase 2 | 52  | 5-Feb    | 14-Jan-14 |

|                |             |                                                                                                                                                            |           |                                                                                                                                                                                                                                                                                                                                                                                                                                                                                                                                                                                                                                                                                                                                                                                                                                                                                                                                                                                                                                                                                                                                                                                                                                                                                                                                                                                                                                                                                                                                                                                                                            |                                                                                                                                     |                                                                                                                                                                                                                                                                                                                                                                                                                                                                                                                                                                                                                                                                                                                                                                                                                                                                                                                                                                                                                                                                                                                                                         |         |      |          |           |
|----------------|-------------|------------------------------------------------------------------------------------------------------------------------------------------------------------|-----------|----------------------------------------------------------------------------------------------------------------------------------------------------------------------------------------------------------------------------------------------------------------------------------------------------------------------------------------------------------------------------------------------------------------------------------------------------------------------------------------------------------------------------------------------------------------------------------------------------------------------------------------------------------------------------------------------------------------------------------------------------------------------------------------------------------------------------------------------------------------------------------------------------------------------------------------------------------------------------------------------------------------------------------------------------------------------------------------------------------------------------------------------------------------------------------------------------------------------------------------------------------------------------------------------------------------------------------------------------------------------------------------------------------------------------------------------------------------------------------------------------------------------------------------------------------------------------------------------------------------------------|-------------------------------------------------------------------------------------------------------------------------------------|---------------------------------------------------------------------------------------------------------------------------------------------------------------------------------------------------------------------------------------------------------------------------------------------------------------------------------------------------------------------------------------------------------------------------------------------------------------------------------------------------------------------------------------------------------------------------------------------------------------------------------------------------------------------------------------------------------------------------------------------------------------------------------------------------------------------------------------------------------------------------------------------------------------------------------------------------------------------------------------------------------------------------------------------------------------------------------------------------------------------------------------------------------|---------|------|----------|-----------|
| VEGF inhibitor | NCT00115765 | PACCE: Panitumumab Advanced Colorectal Cancer Evaluation Study                                                                                             | Completed | Colorectal Cancer                                                                                                                                                                                                                                                                                                                                                                                                                                                                                                                                                                                                                                                                                                                                                                                                                                                                                                                                                                                                                                                                                                                                                                                                                                                                                                                                                                                                                                                                                                                                                                                                          | Drug: Oxaliplatin Based Chemotherapy Drug: Panitumumab Drug: Irinotecan Based Chemotherapy Drug: Bevacizumab                        | Progression-Free Survival (Oxaliplatin) Objective Tumor Response Through Week 12 (Irinotecan) Overall Survival (Oxaliplatin) Objective Tumor Response Rate (Oxaliplatin) Time to Progression (Oxaliplatin) Time to Treatment Failure (Oxaliplatin) Overall Survival (Irinotecan) Progression-free Survival (Irinotecan) Objective Tumor Response Rate (Irinotecan) Time to Progression (Irinotecan) Time to Treatment                                                                                                                                                                                                                                                                                                                                                                                                                                                                                                                                                                                                                                                                                                                                   | Phase 3 | 1053 | 1-Jun-05 | 17-Oct-18 |
| VEGF inhibitor | NCT00508625 | A Study of AMG 951 (rhApo2L/TRAIL) in Subjects With Previously Untreated Non-Small Cell Lung Cancer (NSCLC) Treated With                                   | Completed | Non-Small Cell Lung Cancer                                                                                                                                                                                                                                                                                                                                                                                                                                                                                                                                                                                                                                                                                                                                                                                                                                                                                                                                                                                                                                                                                                                                                                                                                                                                                                                                                                                                                                                                                                                                                                                                 | Drug: AMG 951 (rhApo2L/TRAIL) Drug: Bevacizumab Drug: Carboplatin Drug: Paclitaxel                                                  | Objective response rate (CR and PR) by modified RECIST Progression free survival Time to response Duration of response Time to progression Overall response rate (complete, partial or stable response) Overall Survival                                                                                                                                                                                                                                                                                                                                                                                                                                                                                                                                                                                                                                                                                                                                                                                                                                                                                                                                | Phase 2 | 213  | 6-Jun    | 14-Jun-16 |
| VEGF inhibitor | NCT00028834 | Bevacizumab and Gemcitabine in Treating Patients With Advanced Pancreatic Cancer                                                                           | Completed | Adenocarcinoma of the Pancreas Recurrent Pancreatic Cancer Stage III Pancreatic Cancer Stage IV Pancreatic Cancer                                                                                                                                                                                                                                                                                                                                                                                                                                                                                                                                                                                                                                                                                                                                                                                                                                                                                                                                                                                                                                                                                                                                                                                                                                                                                                                                                                                                                                                                                                          | Drug: gemcitabine hydrochloride Biological: bevacizumab Other: laboratory biomarker analysis                                        | Objective response rate (complete or partial responses) Progression-free survival Overall survival                                                                                                                                                                                                                                                                                                                                                                                                                                                                                                                                                                                                                                                                                                                                                                                                                                                                                                                                                                                                                                                      | Phase 2 | 50   | 2-Feb    | 24-Jan-13 |
| VEGF inhibitor | NCT00023959 | Bevacizumab, Fluorouracil, and Hydroxyurea Plus Radiation Therapy in Treating Patients With Advanced Head and Neck Cancer                                  | Completed | Metastatic Squamous Neck Cancer with Occult Primary Squamous Cell Carcinoma Recurrent Adenoid Cystic Carcinoma of the Oral Cavity Recurrent Basal Cell Carcinoma of the Lip Recurrent Esthesioneuroblastoma of the Paranasal Sinus and Nasal Cavity Recurrent Inverted Papilloma of the Paranasal Sinus and Nasal Cavity Recurrent Lymphoepithelioma of the Nasopharynx Recurrent Lymphoepithelioma of the Oropharynx Recurrent Metastatic Squamous Neck Cancer With Occult Primary Recurrent Midline Lethal Granuloma of the Paranasal Sinus and Nasal Cavity Recurrent Mucoepidermoid Carcinoma of the Oral Cavity Recurrent Salivary Gland Cancer Recurrent Squamous Cell Carcinoma of the Hypopharynx Recurrent Squamous Cell Carcinoma of the Larynx Recurrent Squamous Cell Carcinoma of the Lip and Oral Cavity Recurrent Squamous Cell Carcinoma of the Nasopharynx Recurrent Squamous Cell Carcinoma of the Oropharynx Recurrent Squamous Cell Carcinoma of the Paranasal Sinus and Nasal Cavity Recurrent Verrucous Carcinoma of the Larynx Recurrent Verrucous Carcinoma of the Oral Cavity Stage III Adenoid Cystic Carcinoma of the Oral Cavity Stage III Basal Cell Carcinoma of the Lip Stage III Esthesioneuroblastoma of the Paranasal Sinus and Nasal Cavity Stage III Inverted Papilloma of the Paranasal Sinus and Nasal Cavity Stage III Lymphoepithelioma of the Nasopharynx Stage III Lymphoepithelioma of the Oropharynx Stage III Midline Lethal Granuloma of the Paranasal Sinus and Nasal Cavity Stage III Mucoepidermoid Carcinoma of the Oral Cavity Stage III Salivary Gland Cancer Stage II | Drug: fluorouracil Biological: bevacizumab Radiation: radiation therapy Biological: filgrastim Other: laboratory biomarker analysis | MTD defined as the dose preceding that at which at least 2 of 3 or 2 of 6 patients experience dose-limiting toxicity assessed using NCI CTCAE version 3.0 Objective response rate (CR+PR) assessed using RECIST criteria Pattern of failure, described as locoregional, distant, or both Duration of response Progression free survival Overall survival                                                                                                                                                                                                                                                                                                                                                                                                                                                                                                                                                                                                                                                                                                                                                                                                | Phase 1 | 39   | 1-Jul    | 7-Feb-13  |
| VEGF inhibitor | NCT01205230 | VEG113971: An Open-Label Study of the Effects of Ketoconazole or Esomeprazole on Pazopanib PK                                                              | Completed | Cancer                                                                                                                                                                                                                                                                                                                                                                                                                                                                                                                                                                                                                                                                                                                                                                                                                                                                                                                                                                                                                                                                                                                                                                                                                                                                                                                                                                                                                                                                                                                                                                                                                     | Drug: pazopanib                                                                                                                     | Plasma Pazopanib Area Under the Concentration-time Curve From Zero (Pre-dose) to 24 Hours (AUC[0-24]) of Pazopanib Alone and of Pazopanib in Combination With Ketoconazole and Esomeprazole Plasma Maximum Observed Concentration (Cmax) of Pazopanib Alone and of Pazopanib in Combination With Ketoconazole and Esomeprazole Time of Occurrence of Cmax (Tmax) of Pazopanib Alone and of Pazopanib in Combination With Ketoconazole and Esomeprazole Plasma Concentration at 24 Hours After Administration (C24) of Pazopanib Alone and of Pazopanib in Combination With Ketoconazole and Esomeprazole Plasma AUC(0-24) for the Indicated Metabolites of Pazopanib When Administered Alone or in Combination With Ketoconazole and Esomeprazole Plasma Cmax for the Indicated Metabolites of Pazopanib When Administered Alone or in Combination With Ketoconazole and Esomeprazole Tmax for the Indicated Metabolites of Pazopanib When Administered Alone or in Combination With Ketoconazole and Esomeprazole Plasma Ketoconazole Concentration at the Indicated Time Points Number of Participants With the Indicated Grade 3 or 4 Adverse Events | Phase 4 | 34   | 10-Sep   | 22-May-12 |
| VEGF inhibitor | NCT01141569 | A Study of RO4929097 in Patients With Advanced Renal Cell Carcinoma That Have Failed Vascular Endothelial Growth Factor (VEGF)/Vascular Endothelial Growth | Completed | Clear Cell Renal Cell Carcinoma Recurrent Renal Cell Carcinoma Stage IV Renal Cell Cancer                                                                                                                                                                                                                                                                                                                                                                                                                                                                                                                                                                                                                                                                                                                                                                                                                                                                                                                                                                                                                                                                                                                                                                                                                                                                                                                                                                                                                                                                                                                                  | Drug: Gamma-Secretase Inhibitor RO4929097 Other: Laboratory Biomarker Analysis                                                      | Objective Response Rate (PR + CR) Using RECIST Time to Progression Frequency and Severity of Adverse Events Progression-free Survival Rate Rate of Disease Stabilizations Tumor Control Rate (CR + PR + SD)                                                                                                                                                                                                                                                                                                                                                                                                                                                                                                                                                                                                                                                                                                                                                                                                                                                                                                                                             | Phase 2 | 12   | 10-Jun   | 10-Mar-17 |
| VEGF inhibitor | NCT00072475 | Vatalanib in Treating Patients With Primary or Secondary Myelodysplastic Syndromes                                                                         | Completed | Leukemia Myelodysplastic Syndromes Myelodysplastic/Myeloproliferative Neoplasms                                                                                                                                                                                                                                                                                                                                                                                                                                                                                                                                                                                                                                                                                                                                                                                                                                                                                                                                                                                                                                                                                                                                                                                                                                                                                                                                                                                                                                                                                                                                            | Drug: vatalanib                                                                                                                     | Number of Participants With Response Time to Transformation to AML Duration of Response Overall Survival Progression-free Survival                                                                                                                                                                                                                                                                                                                                                                                                                                                                                                                                                                                                                                                                                                                                                                                                                                                                                                                                                                                                                      | Phase 2 | 155  | 3-Dec    | 1-Aug-16  |

|                |             |                                                                                                                                                                                                        |           |                                                                                                                                                                                   |                                                                                                                                                     |                                                                                                                                                                                                                                                                                                                                                                                                                                                                                                                                                                                                                                                                                                                                                                                                                                                                             |                 |     |           |           |
|----------------|-------------|--------------------------------------------------------------------------------------------------------------------------------------------------------------------------------------------------------|-----------|-----------------------------------------------------------------------------------------------------------------------------------------------------------------------------------|-----------------------------------------------------------------------------------------------------------------------------------------------------|-----------------------------------------------------------------------------------------------------------------------------------------------------------------------------------------------------------------------------------------------------------------------------------------------------------------------------------------------------------------------------------------------------------------------------------------------------------------------------------------------------------------------------------------------------------------------------------------------------------------------------------------------------------------------------------------------------------------------------------------------------------------------------------------------------------------------------------------------------------------------------|-----------------|-----|-----------|-----------|
| VEGF inhibitor | NCT00375310 | Phase I Study of Gemcitabine, Sorafenib and Radiotherapy in Patients With Unresectable Pancreatic Cancer                                                                                               | Completed | Pancreatic Cancer Adenocarcinoma of the Pancreas                                                                                                                                  | Drug: Gemcitabine, Sorafenib Procedure: Radiotherapy                                                                                                | To evaluate the safety and tolerability of the combined treatment with Gemcitabine with Sorafenib and radiotherapy in patients with localized unresectable pancreatic cancer. To evaluate the response rate (CR + PR), clinical benefit (CR + PR + SD) and tumor shrinkage (CR + PR + SD that shrinks) of Gemcitabine with Sorafenib and radiotherapy To evaluate time to disease progression and overall survival. To evaluate pharmacodynamic changes in tumor vascular parameters (e.g blood flow, blood volume, time to peak in ROC-receiver operator characteristics curve) by DCE-MRI and correlate with outcomes. To evaluate biologic markers such as VEGF, eNOS and HIF1-alpha, VEGF-R2 genetic polymorphisms and serum proteomics, and correlate with outcomes. To evaluate resectability rates of tumors after treatment. To evaluate the maximum tolerated dose | Phase 1         | 27  | 6-Sep     | 29-Feb-16 |
| VEGF inhibitor | NCT00436956 | AZD2171 to Treat Prostate Cancer                                                                                                                                                                       | Completed | Prostate Cancer                                                                                                                                                                   | Procedure: Magnetic Resonance Imaging (DCE-MRI) Drug: AZD2171 Drug: Prednisone                                                                      | Percent Probability of Participants With 6-month Progression-free Survival (PFS) Number of Participants With Adverse Events Number of Grade 2 Toxicities Number of Grade 3 Toxicities Median Overall Survival Median Progression Free Survival (PFS) Response Per the Response Evaluation Criteria in Solid Tumors (RECIST)                                                                                                                                                                                                                                                                                                                                                                                                                                                                                                                                                 | Phase 2         | 59  | 16-Oct-06 | 9-Oct-18  |
| VEGF inhibitor | NCT00496587 | Capecitabine, Gemcitabine, and Bevacizumab in Combination for Patients With Sarcomatoid Renal                                                                                                          | Completed | Renal Cell Carcinoma Kidney Cancer                                                                                                                                                | Drug: Capecitabine Drug: Gemcitabine Drug: Bevacizumab                                                                                              | Progression Free Survival (PFS) Time to Treatment Failure (TTF) Objective Response Rate (ORR)                                                                                                                                                                                                                                                                                                                                                                                                                                                                                                                                                                                                                                                                                                                                                                               | Phase 2         | 34  | 7-Jul     | 19-Jul-17 |
| VEGF inhibitor | NCT01575522 | Tivantinib in Treating Patients With Recurrent or Metastatic Breast Cancer                                                                                                                             | Completed | Estrogen Receptor Negative HER2/Neu Negative Progesterone Receptor Negative Recurrent Breast Carcinoma Stage IV Breast Cancer Triple-                                             | Other: Laboratory Biomarker Analysis Drug: Tivantinib                                                                                               | PFS Status Overall Response Using RECIST v1.1 To Evaluate c-Met Expression in Archival Tumor Tissue. To Evaluate Phospho c-Met Expression in Archival Tumor Tissue. To Evaluate the Incidence of c-Met Positive Circulating Tumor Cells.                                                                                                                                                                                                                                                                                                                                                                                                                                                                                                                                                                                                                                    | Phase 2         | 22  | 12-Mar    | 21-Mar-16 |
| VEGF inhibitor | NCT00387374 | Radiation Therapy, Bevacizumab, Paclitaxel, and Carboplatin in Treating Patients With Unresectable Stage IIIB or Stage IV Non-Small Cell Lung Cancer at High Risk for Hemoptysis Caused by Bevacizumab | Completed | Adenosquamous Cell Lung Cancer Drug/Agent Toxicity by Tissue/Organ Hemoptysis Squamous Cell Lung Cancer Stage IIIB Non-small Cell Lung Cancer Stage IV Non-small Cell Lung Cancer | Biological: bevacizumab Drug: paclitaxel Drug: carboplatin Radiation: radiation therapy                                                             | Safety of treatment as measured by the incidence of grade 3-5 hemoptysis, as assessed by NCI CTCAE version 3.0 Response rate according to RECIST Overall survival Progression-free survival defined as the duration of time from start of protocol treatment to time of progression or death according to RECIST                                                                                                                                                                                                                                                                                                                                                                                                                                                                                                                                                            | Phase 2         | 72  | 6-Oct     | 17-Jan-13 |
| VEGF inhibitor | NCT00508586 | PTC299 and Hormonal Agent for Treatment of Metastatic Breast Cancer                                                                                                                                    | Completed | Metastatic Breast Cancer                                                                                                                                                          | Drug: PTC299                                                                                                                                        | Maximum Tolerated Dose (MTD) within the tested dose range. Overall safety profile Study drug compliance Pharmacokinetics Circulating angiogenic markers Tumor perfusion as assessed by dynamic contrast-enhanced magnetic resonance imaging (DCE-MRI) Tumor metabolism as assessed by fluorodeoxyglucose positron emission tomography (FDG-PET) Antitumor activity as assessed by computed tomography (CT) scans and tumor                                                                                                                                                                                                                                                                                                                                                                                                                                                  | Phase 1         | 33  | 7-Nov     | 3-Mar-16  |
| VEGF inhibitor | NCT00052559 | Bevacizumab, Fluorouracil, and External-Beam Radiation Therapy in Treating Patients With Stage II or Stage III Rectal Cancer                                                                           | Completed | Adenocarcinoma of the Rectum Stage II Rectal Cancer Stage III Rectal Cancer                                                                                                       | Biological: bevacizumab Drug: fluorouracil Radiation: external beam radiation therapy Procedure: therapeutic conventional surgery Other: laboratory | Maximum tolerated dose of bevacizumab when administered concurrently with 5-fluorouracil (5-FU) and external beam radiation therapy (EBRT) in patients with cT3 and T4 rectal cancer prior to surgery Pathological response rate after preoperative bevacizumab, 5-FU, EBRT, and surgery Progression-free survival Local control Overall                                                                                                                                                                                                                                                                                                                                                                                                                                                                                                                                    | Phase 1         | 32  | 2-Aug     | 5-Jun-13  |
| VEGF inhibitor | NCT00387387 | Study On Pazopanib When Given With FOLFOX6 (Fluorouracil, Oxaliplatin, Leucovorin) Or CapeOx (Capecitabine, Oxaliplatin)                                                                               | Completed | Neoplasms, Colorectal                                                                                                                                                             | Drug: Pazopanib Drug: FOLFOX 6 Drug: CapeOx                                                                                                         | Plasma AUC(0-24) of pazopanib on Day 1, 14 and 21 Plasma AUC(0-46) of 5-FU and AUC(0-8) of platinum on Day 1 Plasma AUC(0-24) of capecitabine, 5-FU, and platinum on Day 1 Pharmacokinetic endpoints (AUC, C24, Cmax, tmax, and half-life) collected predose and 1, 2, 3, 4, 5, 6, 8, and 24 hours on Day 1. Assessment of disease by imaging                                                                                                                                                                                                                                                                                                                                                                                                                                                                                                                               | Phase 1         | 50  | 20-Oct-06 | 17-Nov-17 |
| VEGF inhibitor | NCT00027703 | Combination Chemotherapy With or Without Bevacizumab in Treating Patients With Malignant                                                                                                               | Completed | Advanced Malignant Mesothelioma Epithelial Mesothelioma Localized Malignant Mesothelioma Recurrent Malignant                                                                      | Drug: gemcitabine hydrochloride Drug: cisplatin Biological: bevacizumab Other: placebo Other: laboratory biomarker                                  | Time to disease progression Complete response rate Objective response rate (complete and partial response) Rate of disease stabilization Overall survival Incidence of adverse events graded according to NCI CTCAE version 3.0                                                                                                                                                                                                                                                                                                                                                                                                                                                                                                                                                                                                                                             | Phase 2         | 106 | 1-Oct     | 11-Feb-14 |
| VEGF inhibitor | NCT01749384 | Tivantinib and Bevacizumab in Treating Patients With Solid Tumors That Are Metastatic or Cannot Be Removed by Surgery                                                                                  | Completed | Solid Neoplasm                                                                                                                                                                    | Biological: Bevacizumab Other: Laboratory Biomarker Analysis Other: Pharmacological Study Drug: Tivantinib                                          | RP2D of the combination of tivantinib and bevacizumab, defined as the dose level at which the dose-limiting toxicity (DLT) rate is closest to 1/6 graded according to the National Cancer Institute (NCI) CTCAE v4.0 Change in HGF, HGFA, VEGF, and PIGF in plasma by enzyme-linked immunosorbent assay Change in MET, FAK, AKT, STAT3 in skin tissue by immunohistochemistry Clinical response rate as evaluated by RECIST Incidence of adverse events graded according to NCI CTCAE v4.0 that are possibly, probably, or definitely related to treatment Pharmacokinetics (PK) of tivantinib                                                                                                                                                                                                                                                                              | Phase 1         | 12  | 6-Dec-12  | 12-Oct-17 |
| VEGF inhibitor | NCT00357318 | Bevacizumab and Sunitinib in Treating Patients With Solid Tumors                                                                                                                                       | Completed | Unspecified Adult Solid Tumor, Protocol Specific                                                                                                                                  | Drug: sunitinib malate Biological: bevacizumab Other: pharmacological study Other: laboratory biomarker analysis                                    | Maximum tolerated dose (MTD) of bevacizumab in combination with sunitinib malate determined according to dose-limiting toxicities (DLTs) graded using Common Terminology Criteria for Adverse Events version 3.0 (CTCAE v3.0) Objective response rate assessed by RECIST Overall survival Progression-free survival                                                                                                                                                                                                                                                                                                                                                                                                                                                                                                                                                         | Phase 1         | 60  | 6-Jun     | 24-Feb-14 |
| VEGF inhibitor | NCT00126503 | Sorafenib Tosylate and Bevacizumab in Treating Patients With Advanced Kidney Cancer                                                                                                                    | Completed | Chromophobe Renal Cell Carcinoma Clear Cell Renal Cell Carcinoma Papillary Renal Cell Carcinoma Recurrent Renal Cell Carcinoma Sarcomatoid Renal Cell Carcinoma Stage IV          | Biological: Bevacizumab Drug: Sorafenib Tosylate Other: Pharmacological Study Other: Laboratory Biomarker Analysis                                  | Maximum Tolerated Dose (MTD) of BAY 43-9006 (Sorafenib)in Combination With Bevacizumab (Phase I) Maximum Tolerated Dose of Bevacizumab in Combination With BAY 43-9006 (Sorafenib)(Phase I) Objective Response Overall Survival Progression-free Survival                                                                                                                                                                                                                                                                                                                                                                                                                                                                                                                                                                                                                   | Phase 1 Phase 2 | 73  | 5-May     | 15-Jan-15 |
| VEGF inhibitor | NCT00016107 | Combination Chemotherapy Plus Bevacizumab in Treating Patients With Metastatic Prostate Cancer                                                                                                         | Completed | Adenocarcinoma of the Prostate Hormone-resistant Prostate Cancer Recurrent Prostate Cancer Stage IV Prostate Cancer                                                               | Drug: estramustine phosphate sodium Drug: docetaxel Biological: bevacizumab Other: laboratory biomarker                                             | Time to objective progression Response rates (PSA and objective) Toxicity as assessed by the National Cancer Institute Common Terminology Criteria for Adverse Events version 2.0 Overall survival Duration of response                                                                                                                                                                                                                                                                                                                                                                                                                                                                                                                                                                                                                                                     | Phase 2         | 72  | 1-Jun     | 5-Jun-13  |

|                |             |                                                                                                                                                                                            |           |                                                                                                                                                                                                                                                            |                                                                                                                                                                                                       |                                                                                                                                                                                                                                                                                                                                                                                                                                                                                                                                                                                               |         |     |           |           |
|----------------|-------------|--------------------------------------------------------------------------------------------------------------------------------------------------------------------------------------------|-----------|------------------------------------------------------------------------------------------------------------------------------------------------------------------------------------------------------------------------------------------------------------|-------------------------------------------------------------------------------------------------------------------------------------------------------------------------------------------------------|-----------------------------------------------------------------------------------------------------------------------------------------------------------------------------------------------------------------------------------------------------------------------------------------------------------------------------------------------------------------------------------------------------------------------------------------------------------------------------------------------------------------------------------------------------------------------------------------------|---------|-----|-----------|-----------|
| VEGF inhibitor | NCT00054132 | Erlotinib Hydrochloride and Bevacizumab in Treating Patients With Stage IV Breast Cancer                                                                                                   | Completed | Recurrent Breast Carcinoma Stage IV Breast Cancer                                                                                                                                                                                                          | Biological: Bevacizumab Drug: Erlotinib Hydrochloride Other: Laboratory Biomarker Analysis                                                                                                            | Level of EGFR Expression Response Rate, Defined as Complete Response (CR) + Partial Response (PR), Using the Response Evaluation Criteria in Solid Tumors Duration of Response Time to Progression Number of Patients Evaluated for Toxicity Participants With Duration of Stable Disease Greater Than or Equal to 6 Months                                                                                                                                                                                                                                                                   | Phase 2 | 38  | 2-Dec     | 24-Jul-17 |
| VEGF inhibitor | NCT00368992 | S0536: Cetuximab, Paclitaxel, Carboplatin, and Bevacizumab in Treating Patients With Advanced Non-Small Cell Lung Cancer                                                                   | Completed | Adenocarcinoma of the Lung Adenosquamous Cell Lung Cancer Bronchoalveolar Cell Lung Cancer Large Cell Lung Cancer Recurrent Non-small Cell Lung Cancer Squamous Cell Lung Cancer Stage IIIB Non-small Cell Lung Cancer Stage IV Non-small Cell Lung Cancer | Biological: cetuximab Drug: paclitaxel Biological: bevacizumab                                                                                                                                        | The Percentage of Patients With Grade 4 (i.e. Life-threatening) Hemorrhage Toxicities Related to Protocol Treatment. Progression-Free Survival Overall Survival Response Rate                                                                                                                                                                                                                                                                                                                                                                                                                 | Phase 2 | 110 | 6-Aug     | 14-Sep-15 |
| VEGF inhibitor | NCT01445509 | Dasatinib in Combination With Bevacizumab to Treat Advanced Solid Tumors                                                                                                                   | Completed | Solid Tumors                                                                                                                                                                                                                                               | Drug: Bevacizumab Drug: Dasatinib                                                                                                                                                                     | Determine the toxicity profile of the combination of dasatinib and bevacizumab. Maximum Tolerated Dose (MTD) of the combination of dasatinib and bevacizumab Estimates of biochemical changes in the src-FAK and src-PLC- and VEGF signal transduction pathways Efficacy of the combination of bevacizumab and dasatinib.                                                                                                                                                                                                                                                                     | Phase 1 | 50  | 30-Oct-08 | 14-Jan-20 |
| VEGF inhibitor | NCT00114179 | Capecitabine, Bevacizumab, and Radiation Therapy Followed By Gemcitabine and Bevacizumab in Treating Patients With Locally Advanced Pancreatic Cancer That Cannot Be Removed By Surgery    | Completed | Adenocarcinoma of the Pancreas Stage II Pancreatic Cancer Stage III Pancreatic Cancer                                                                                                                                                                      | Drug: capecitabine Radiation: radiation therapy Biological: bevacizumab Procedure: therapeutic conventional surgery Drug: gemcitabine hydrochloride                                                   | Overall survival rate Frequency of patients developing grade 3 or greater adverse events as defined per CTCAE version 3.0 Progression-free survival Response rate                                                                                                                                                                                                                                                                                                                                                                                                                             | Phase 2 | 82  | 5-Jan     | 15-Apr-15 |
| VEGF inhibitor | NCT02101918 | Ziv-Aflibercept in Treating and Computed Tomography Perfusion Imaging in Predicting Response in Patients With Pancreatic Neuroendocrine Tumors That Are Metastatic or Cannot Be Removed by | Completed | Multiple Endocrine Neoplasia Type 1 Pancreatic Neuroendocrine Carcinoma                                                                                                                                                                                    | Radiation: Computed Tomography Perfusion Imaging Other: Laboratory Biomarker Analysis Biological: Ziv-Aflibercept                                                                                     | Objective response rate according to Response Evaluation Criteria in Solid Tumors (RECIST) 1.1 Progression free survival (PFS) Baseline blood volume (BV) Baseline permeability surface (PS)                                                                                                                                                                                                                                                                                                                                                                                                  | Phase 2 | 22  | 18-Jun-14 | 20-Dec-18 |
| VEGF inhibitor | NCT00094107 | Anti-Angiogenesis Agent AG-013736 In Patients With Metastatic                                                                                                                              | Completed | Melanoma Skin Neoplasms                                                                                                                                                                                                                                    | Drug: Axitinib [AG-013736]                                                                                                                                                                            | Percentage of Participants With Objective Response (OR) Progression-free Survival (PFS) Duration of Response (DR) Overall Survival (OS)                                                                                                                                                                                                                                                                                                                                                                                                                                                       | Phase 2 | 32  | 4-Dec     | 26-Jun-12 |
| VEGF inhibitor | NCT00322400 | Phase Ib to Evaluate Safety of AMG706 in Combination With Paclitaxel or Docetaxel for Breast Cancer                                                                                        | Completed | Locally Recurrent and Metastatic Breast Cancer                                                                                                                                                                                                             | Drug: Docetaxel Drug: Paclitaxel Drug: AMG 706                                                                                                                                                        | Incidence of dose limiting toxicities (DLTs) Pharmacokinetics of AMG 706 when administered with paclitaxel (Arm A) or docetaxel (Arm B) Pharmacokinetics of paclitaxel (Arm A) when administered with AMG 706 Pharmacokinetics of docetaxel (Arm B) when administered with AMG 706 Incidence of adverse events and clinical laboratory abnormalities not defined as DLTs Objective tumor response (complete or partial response) according to modified RECIST Duration of response (calculated for those subjects who respond): time from first objective tumor response to objective disease | Phase 1 | 46  | 6-Mar     | 31-Jul-13 |
| VEGF inhibitor | NCT00152477 | A Study of Paclitaxel/Carboplatin With or Without CDP791 in Patients With Lung Cancer                                                                                                      | Completed | Carcinoma Non-Squamous Non-Small-Cell Lung Cancer                                                                                                                                                                                                          | Drug: Carboplatin Drug: Paclitaxel Drug: CDP791 10mg/kg Drug: CDP791 20mg/kg                                                                                                                          | Tumour response rate at 18 weeks. Safety and Tolerability Progression free survival Time to treatment failure Overall survival Quality of life                                                                                                                                                                                                                                                                                                                                                                                                                                                | Phase 2 | 165 | 5-Aug     | 23-Feb-17 |
| VEGF inhibitor | NCT01205022 | Radiolabeled Monoclonal Antibody Therapy, Combination Chemotherapy, and Bevacizumab in Treating Patients With Metastatic Colorectal Cancer                                                 | Completed | Recurrent Colon Cancer Recurrent Rectal Cancer Stage IV Colon Cancer Stage IV Rectal Cancer                                                                                                                                                                | Drug: irinotecan hydrochloride Drug: leucovorin calcium Drug: fluorouracil Biological: bevacizumab Radiation: yttrium Y 90 DOTA anti-CEA monoclonal antibody M5A Other: laboratory biomarker analysis | Maximum tolerated dose of yttrium-90 (90Y) M5A anti-CEA antibody when given in combination with FOLFIRI chemotherapy and bevacizumab Progression-free survival Overall survival Response rates Biodistribution, clearance, and metabolism of Y-90 and In-111-M5A Estimation of radiation doses to whole body, normal organs, and tumor through serial nuclear imaging                                                                                                                                                                                                                         | Phase 1 | 3   | 11-Apr    | 8-Jun-15  |
| VEGF inhibitor | NCT01011010 | Sorafenib Tosylate and Chemoembolization With Doxorubicin Hydrochloride and Mitomycin in Treating Patients With Liver Cancer That Cannot Be                                                | Completed | Liver Cancer                                                                                                                                                                                                                                               | Drug: doxorubicin hydrochloride Drug: mitomycin C Drug: sorafenib tosylate Other: laboratory biomarker analysis Other: pharmacological study                                                          | Safety and toxicity as assessed by NCI CTCAE v3.0 criteria Overall survival Correlative studies                                                                                                                                                                                                                                                                                                                                                                                                                                                                                               | Phase 1 | 11  | 22-Jul-09 | 5-Jan-18  |
| VEGF inhibitor | NCT00979862 | Cediranib Maleate and Cilengitide in Treating Patients With Progressive or Recurrent Glioblastoma                                                                                          | Completed | Adult Giant Cell Glioblastoma Adult Glioblastoma Adult Gliosarcoma Recurrent Adult Brain Neoplasm                                                                                                                                                          | Drug: Cediranib Maleate Drug: Cilengitide Other: Laboratory Biomarker Analysis                                                                                                                        | Safety profile of cediranib maleate based on the incidence of dose-limiting toxicity (DLT) as assessed by the National Cancer Institute (NCI) Common Terminology Criteria for Adverse Events (CTCAE) version 4.0 Change in markers Overall survival (OS) Progression-free survival Radiographic responses using MRI scan                                                                                                                                                                                                                                                                      | Phase 1 | 47  | 10-Mar    | 15-Apr-15 |
| VEGF inhibitor | NCT01753713 | Dovitinib in Treating Patients With Recurrent or Progressive Glioblastoma                                                                                                                  | Completed | Adult Giant Cell Glioblastoma Adult Glioblastoma Adult Gliosarcoma Recurrent Adult Brain Tumor                                                                                                                                                             | Drug: dovitinib Other: laboratory biomarker analysis                                                                                                                                                  | Arm 1: Progression Free Survival (PFS) Arm 2: Determine Median Time to Progression Toxicity Assessed Using Common Terminology Criteria for Adverse Events (CTCAE) Version 4.0 Objective Response Rate Using Modified Revised Assessment in Neuro-Oncology (RANO) Criteria Median Progression Free Survival Overall Survival                                                                                                                                                                                                                                                                   | Phase 2 | 33  | 20-Dec-12 | 12-Dec-17 |
| VEGF inhibitor | NCT00095459 | BAY 43-9006 (Sorafenib) and Bevacizumab (Avastin) To Treat Solid Tumors                                                                                                                    | Completed | Neoplasms                                                                                                                                                                                                                                                  | Drug: Bevacizumab Drug: BAY 43-9006                                                                                                                                                                   |                                                                                                                                                                                                                                                                                                                                                                                                                                                                                                                                                                                               | Phase 1 | 57  | 2-Nov-04  | 17-Dec-19 |
| VEGF inhibitor | NCT00056446 | Study of Oxaliplatin/5-FU/Leucovorin Plus Vatalanib Versus Oxaliplatin/5-FU/Leucovorin in Patients With Previously Treated Metastatic                                                      | Completed | Colorectal Neoplasms Colonic Neoplasms Rectal Neoplasms                                                                                                                                                                                                    | Drug: Vatalanib                                                                                                                                                                                       | Overall survival Progression free survival Time to progression Time to treatment failure Tumor response rate Tolerability and safety profile                                                                                                                                                                                                                                                                                                                                                                                                                                                  | Phase 3 | 855 | 3-Jan     | 6-Mar-17  |



|                |             |                                                                                                                                                                  |           |                                                                                                                                              |                                                                                                                                                                                                                                                                                                                                                                                                             |                                                                                                                                                                                                                                                                                                                                                                                                                                                                                                                                                                                                                                                                                                                                                                                                                                                                                                                                                                                                                                                              |                 |      |           |           |
|----------------|-------------|------------------------------------------------------------------------------------------------------------------------------------------------------------------|-----------|----------------------------------------------------------------------------------------------------------------------------------------------|-------------------------------------------------------------------------------------------------------------------------------------------------------------------------------------------------------------------------------------------------------------------------------------------------------------------------------------------------------------------------------------------------------------|--------------------------------------------------------------------------------------------------------------------------------------------------------------------------------------------------------------------------------------------------------------------------------------------------------------------------------------------------------------------------------------------------------------------------------------------------------------------------------------------------------------------------------------------------------------------------------------------------------------------------------------------------------------------------------------------------------------------------------------------------------------------------------------------------------------------------------------------------------------------------------------------------------------------------------------------------------------------------------------------------------------------------------------------------------------|-----------------|------|-----------|-----------|
| VEGF inhibitor | NCT01379534 | A Phase II Study to Evaluate the Efficacy of TKI258 for the Treatment of Patients With FGFR2 Mutated or Wild-type Advanced and/or Metastatic Endometrial Cancer  | Completed | Solid Tumors and Advanced Endometrial Cancer Endometrial Cancer Second-line Treatment VEGF                                                   | Drug: TKI258                                                                                                                                                                                                                                                                                                                                                                                                | Progression Free Survival (PFS) Rate Overall Response Rate (ORR) Disease Control Rate (DCR) Duration of Response (DR) Overall Survival (OS) Progression Free Survival (PFS) Number of Participants With Adverse Events, Serious Adverse Events and Deaths                                                                                                                                                                                                                                                                                                                                                                                                                                                                                                                                                                                                                                                                                                                                                                                                    | Phase 2         | 53   | 11-Nov    | 20-May-15 |
| VEGF inhibitor | NCT00110214 | Docetaxel and Prednisone With or Without Bevacizumab in Treating Patients With Prostate Cancer That Did Not Respond to Hormone                                   | Completed | Adenocarcinoma of the Prostate Hormone-resistant Prostate Cancer Recurrent Prostate Cancer Stage IV Prostate Cancer                          | Drug: docetaxel Other: placebo Drug: prednisone Biological: bevacizumab Other: laboratory biomarker analysis                                                                                                                                                                                                                                                                                                | Overall Survival Proportion of Participants Who Experienced at Least a 50% Post-therapy PSA (Prostate-Specific Antigen) Decline Progression-free Survival (PFS) Proportion of Participants Who Experience (Maximum) Grade 3 or Higher Toxicities                                                                                                                                                                                                                                                                                                                                                                                                                                                                                                                                                                                                                                                                                                                                                                                                             | Phase 3         | 1050 | 5-Apr     | 9-May-14  |
| VEGF inhibitor | NCT00305877 | Bevacizumab or Cetuximab And Gemcitabine Hydrochloride, Capecitabine, and Radiation Therapy in Treating Patients With Paecreatic Cancer That Has Been Completely | Completed | Stage IA Pancreatic Cancer Stage IB Pancreatic Cancer Stage IIA Pancreatic Cancer Stage IIB Pancreatic Cancer                                | Biological: cetuximab Drug: gemcitabine hydrochloride Drug: capecitabine Radiation: radiation therapy Biological: bevacizumab Other: laboratory biomarker analysis                                                                                                                                                                                                                                          | Proportion of Patients With Specific Protocol Defined Adverse Event at Conclusion of All Therapy Two-year Overall Survival Rate Two-year Disease-free Survival (DFS)                                                                                                                                                                                                                                                                                                                                                                                                                                                                                                                                                                                                                                                                                                                                                                                                                                                                                         | Phase 2         | 137  | 6-Feb     | 21-May-14 |
| VEGF inhibitor | NCT00056459 | Study of Oxaliplatin/5-FU/Leucovorin Plus Vatalanib Versus Oxaliplatin/5-FU/Leucovorin in Patients With Metastatic Colorectal Cancer.                            | Completed | Colorectal Neoplasms Colonic Neoplasms Rectal Neoplasms                                                                                      | Drug: Vatalanib                                                                                                                                                                                                                                                                                                                                                                                             | Progression free survival Time to progression Time to treatment failure Best overall response rate Tolerability and safety profile                                                                                                                                                                                                                                                                                                                                                                                                                                                                                                                                                                                                                                                                                                                                                                                                                                                                                                                           | Phase 3         | 1168 | 3-Feb     | 10-Feb-20 |
| VEGF inhibitor | NCT00089609 | Docetaxel, Thalidomide, Prednisone, and Bevacizumab to Treat Metastatic Prostate Cancer                                                                          | Completed | Prostatic Neoplasms                                                                                                                          | Drug: Docetaxel Drug: Thalidomide Drug: Prednisone Biological: bevacizumab Genetic: polymorphism analysis Other: immunoenzyme technique Other: laboratory biomarker analysis Other: pharmacological study                                                                                                                                                                                                   | Number of Participants Who Had a Prostate-specific Antigen (PSA) Response Immune Response Number of Participants With Adverse Events Time to Progression Using Bubleby Criteria Disease Progression by Clinical and Radiographic Criteria Without the Use of Prostate-Specific Antigen (PSA) Number of Participants Who Died After a Follow Up of 34 Months Following Treatment Plasma Concentrations of Docetaxel and Thalidomide and Clinical Activity or Toxicity Number of Participants With a Significant Increase in Circulating Apoptotic Endothelial Cell (CAEC) Level Analyze the Patients Genotype With Regard to Cytochrome P450 2C19 Polymorphism and Correlate That With Pharmacokinetics and Efficacy Usefulness of Dynamic Magnetic Resonance Imaging (MRI) to Monitor the Progression of Bony and Soft Tissue Disease in Metastatic Prostate Cancer Changes in the Molecular Markers of Angiogenesis (Including, But Not Limited to Serum and Urine Vascular Endothelial Growth Factor (VEGF)) Before and After Administration of Docetaxel. | Phase 2         | 73   | 19-Apr-05 | 20-Apr-18 |
| VEGF inhibitor | NCT00924820 | A Pilot Study of Bevacizumab for Neoplastic Meningitis                                                                                                           | Completed | Neoplastic Meningitis                                                                                                                        | Drug: Bevacizumab                                                                                                                                                                                                                                                                                                                                                                                           | Cerebrospinal fluid (CSF) Response Rate Time to Neurological Progression (TTNP)                                                                                                                                                                                                                                                                                                                                                                                                                                                                                                                                                                                                                                                                                                                                                                                                                                                                                                                                                                              | Phase 1 Phase   | 20   | 9-Jun     | 18-Nov-15 |
| VEGF inhibitor | NCT00226005 | PTK787 in Patients With Advanced Metastatic Pancreatic Adenocarcinoma                                                                                            | Completed | Neoplasm                                                                                                                                     | Drug: PTK787/ZK222584                                                                                                                                                                                                                                                                                                                                                                                       | To evaluate the 6-month survival rate and time to progression in pancreatic cancer patients treated with PTK787/ZK222584. To assess the response rates of patients treated with PTK787/ZK222584. To evaluate DCE-MRI as a surrogate of response to PTK787/ZK222584 therapy in pancreatic cancer patients. To perform analysis of tissue, blood and plasma markers that may be helpful in assessing the likelihood of benefit from                                                                                                                                                                                                                                                                                                                                                                                                                                                                                                                                                                                                                            | Phase 2         | 67   | 5-Dec     | 9-May-12  |
| VEGF inhibitor | NCT00217425 | Bevacizumab and Combination Chemotherapy in Treating Patients With Peripheral T-Cell Lymphoma or Natural Killer Cell Neoplasms                                   | Completed | Lymphoma                                                                                                                                     | Biological: bevacizumab Drug: cyclophosphamide Drug: doxorubicin Drug: prednisone Drug: vincristine                                                                                                                                                                                                                                                                                                         | 12-Month Progression-Free Survival (PFS) Overall Response Rate 3-Year Overall Survival                                                                                                                                                                                                                                                                                                                                                                                                                                                                                                                                                                                                                                                                                                                                                                                                                                                                                                                                                                       | Phase 2         | 46   | 6-Jul     | 7-May-14  |
| VEGF inhibitor | NCT03913806 | FLuoresence Image Guided Surgery With A VEGF-targeted Tracer in Soft-tissue Sarcomas in Humans Approach With Bevacizumab-IRDye                                   | Completed | Soft Tissue Sarcoma                                                                                                                          | Drug: Bevacizumab-IRDye800CW                                                                                                                                                                                                                                                                                                                                                                                | Tracer detection Part 1: Dose finding Part 1: Number of participants with treatment-related adverse events as assessed by CTCAE v4.0 Part 2: Optimal dose                                                                                                                                                                                                                                                                                                                                                                                                                                                                                                                                                                                                                                                                                                                                                                                                                                                                                                    | Phase 1 Phase 2 | 16   | 1-May-18  | 28-Jan-20 |
| VEGF inhibitor | NCT02806817 | ME-344 in Early HER2-negative Breast Cancer With Antiangiogenic-induced Mitochondrial Metabolism                                                                 | Completed | Breast Cancer Human Epidermal Growth Factor 2 Negative Carcinoma of Breast Early-Stage Breast Carcinoma                                      | Drug: ME-344 Drug: Bevacizumab Other: Normal saline                                                                                                                                                                                                                                                                                                                                                         | Reduction of FDG uptake SDH (succinate dehydrogenase) levels staining Toxicity profile: Number of Participants With Treatment-Related Adverse Events as Assessed by CTCAE v4.0 Ki67 changes Cleaved caspase-3 changes                                                                                                                                                                                                                                                                                                                                                                                                                                                                                                                                                                                                                                                                                                                                                                                                                                        | Early Phase 1   | 40   | 16-Jul    | 23-Jul-19 |
| VEGF inhibitor | NCT01280643 | Combination Chemotherapy and Cetuximab or Bevacizumab in Treating Patients With Metastatic Colorectal Cancer                                                     | Completed | Metastatic Colorectal Cancer                                                                                                                 | Drug: fluorouracil Drug: leucovorin calcium Drug: oxaliplatin Drug: irinotecan hydrochloride Biological: bevacizumab Biological: cetuximab Drug: capecitabine Genetic: mutation analysis Genetic: gene expression analysis Other: laboratory biomarker analysis Other: immunohistochemistry staining method Genetic: nucleic acid sequencing Genetic: protein expression analysis Genetic: polymerase chain | Feasibility, defined as a sufficient proportion of subjects having available tissue and an acceptable composite assay success rate among tested subjects Best overall response via RECIST Time to failure of treatment strategy Progression-free survival                                                                                                                                                                                                                                                                                                                                                                                                                                                                                                                                                                                                                                                                                                                                                                                                    | Not Applicable  | 11   | 10-Mar    | 11-Sep-15 |
| VEGF inhibitor | NCT00321646 | Neoadjuvant Bevacizumab Plus Docetaxel in High Risk Patients With Prostate Cancer Undergoing Radical                                                             | Completed | Prostate Cancer Adenocarcinoma of the Prostate                                                                                               | Drug: Bevacizumab Drug: Docetaxel                                                                                                                                                                                                                                                                                                                                                                           | Endorectal MRI Response After Completion of 6 Cycles of Neoadjuvant Therapy PSA Response After Completing 6 Cycles of Neoadjuvant Chemotherapy.                                                                                                                                                                                                                                                                                                                                                                                                                                                                                                                                                                                                                                                                                                                                                                                                                                                                                                              | Phase 2         | 42   | 6-Jun     | 16-May-16 |
| VEGF inhibitor | NCT00091026 | Bevacizumab and Gemcitabine Combined With Either Cetuximab or Erlotinib in Treating Patients With Advanced Pancreatic Cancer                                     | Completed | Adenocarcinoma of the Pancreas Recurrent Pancreatic Cancer Stage II Pancreatic Cancer Stage III Pancreatic Cancer Stage IV Pancreatic Cancer | Biological: cetuximab Drug: gemcitabine hydrochloride Biological: bevacizumab Drug: erlotinib hydrochloride                                                                                                                                                                                                                                                                                                 | Objective Response Rate (Complete or Partial Response) Evaluated Using the Response Evaluation Criteria in Solid Tumors (RECIST) Progression-free Survival Overall Survival                                                                                                                                                                                                                                                                                                                                                                                                                                                                                                                                                                                                                                                                                                                                                                                                                                                                                  | Phase 2         | 143  | 4-Jul     | 15-May-14 |

|                |             |                                                                                                                                              |           |                                                                                                                                                                                                                                          |                                                                                                                                                                                                                                                                                                                                                                                                    |                                                                                                                                                                                                                                                                                                                                                                                                                                                                                                                                                                                                                                                                                                                                                                                                                                                                                                                                                                                                                                                                                                                                                                                                                                                                                                                                                                       |               |     |           |           |
|----------------|-------------|----------------------------------------------------------------------------------------------------------------------------------------------|-----------|------------------------------------------------------------------------------------------------------------------------------------------------------------------------------------------------------------------------------------------|----------------------------------------------------------------------------------------------------------------------------------------------------------------------------------------------------------------------------------------------------------------------------------------------------------------------------------------------------------------------------------------------------|-----------------------------------------------------------------------------------------------------------------------------------------------------------------------------------------------------------------------------------------------------------------------------------------------------------------------------------------------------------------------------------------------------------------------------------------------------------------------------------------------------------------------------------------------------------------------------------------------------------------------------------------------------------------------------------------------------------------------------------------------------------------------------------------------------------------------------------------------------------------------------------------------------------------------------------------------------------------------------------------------------------------------------------------------------------------------------------------------------------------------------------------------------------------------------------------------------------------------------------------------------------------------------------------------------------------------------------------------------------------------|---------------|-----|-----------|-----------|
| VEGF inhibitor | NCT00696696 | Study of Gemcitabine and Erlotinib Plus Sorafenib (GES) in Metastatic Pancreatic Cancer                                                      | Completed | Pancreatic Cancer                                                                                                                                                                                                                        | Drug: Gemcitabine Drug: Erlotinib Drug: Sorafenib                                                                                                                                                                                                                                                                                                                                                  | 4-month Progression Free Survival (PFS) Rate Objective Response Rate Median Overall Survival (mOS)                                                                                                                                                                                                                                                                                                                                                                                                                                                                                                                                                                                                                                                                                                                                                                                                                                                                                                                                                                                                                                                                                                                                                                                                                                                                    | Phase 2       | 45  | 7-Sep     | 30-Jun-16 |
| VEGF inhibitor | NCT00720304 | Erlotinib, Docetaxel, and Radiation Therapy in Stage III or Stage IV Squamous Cell Carcinoma of the Head and Neck                            | Completed | Head and Neck Cancer                                                                                                                                                                                                                     | Drug: docetaxel Drug: erlotinib hydrochloride Genetic: fluorescence in situ hybridization Genetic: polymerase chain reaction Other: immunoenzyme technique Other: immunohistochemistry staining method Other: laboratory biomarker analysis Other: pharmacological study Procedure: therapeutic conventional surgery Radiation: intensity-modulated radiation therapy Radiation: radiation therapy | Progression-free-survival Time to progression Response rate (complete response, partial response, stable disease, and disease progression) Overall survival Toxicities Predictive values of EGFR/TGF- $\beta$ , VEGF                                                                                                                                                                                                                                                                                                                                                                                                                                                                                                                                                                                                                                                                                                                                                                                                                                                                                                                                                                                                                                                                                                                                                  | Phase 2       | 37  | 7-Nov     | 26-Nov-15 |
| VEGF inhibitor | NCT00433381 | Bevacizumab and Irinotecan or Temozolomide in Treating Patients With Recurrent or Refractory Glioblastoma Multiforme or Gliosarcoma          | Completed | Adult Glioblastoma Adult Gliosarcoma Recurrent Adult Brain Neoplasm                                                                                                                                                                      | Biological: Bevacizumab Drug: Irinotecan Hydrochloride Drug: Temozolomide                                                                                                                                                                                                                                                                                                                          | Count/Percentage of Patients Progression-free at 6 Months for Bevacizumab and Irinotecan Hydrochloride Arm Count/Percentage of Patients Discontinuing Treatment Due to Treatment-related Medical Complications(Bevacizumab and Temozolomide Arm) Number of Participants With Predicted Progression-free Survival at 6 Months (PFS-6) Number of Participants With Predicted Overall Survival (OS) at 12 Months Count/Percentage of Patients Progression-free at 6 Months for Bevacizumab and Temozolomide Arm Patients' Best Objective Response (Complete Response, Partial Response, Stable Disease, Progression) Agreement Between Local Interpretation and Central Interpretation of Standard MRI Accuracy of Local PFS 6-mo Interpretation Using Central Review PFS-6 as the Reference Standard Correlation of Degree of Cerebral Blood Volume (CBV) and Lactate (Lac) to N-acetylaspartate (NAA) (Lac/NAA) Ratio Correlation of Degree of Cerebral Blood Volume (CBV) and Lactate (Lac) to Patient Response Predictive Value of CBV and Lac/NAA in Assessing 6-month Progression-free Survival Change in Perfusion MRI Markers at Week 2 as Predictors of 12mo Overall Survival (OS) Change in Perfusion MRI Markers at Week 8 as Predictors of 12mo Overall Survival (OS) Change in Perfusion MRI Markers at Week 16 as Predictors of 12mo Overall Survival (OS) | Phase 2       | 123 | 1-Mar-07  | 17-Sep-18 |
| VEGF inhibitor | NCT00072566 | Bevacizumab and Low-Dose Cyclophosphamide in Treating Patients With Recurrent Ovarian Epithelial or Primary Peritoneal                       | Completed | Primary Peritoneal Carcinoma Recurrent Ovarian Carcinoma Stage IV Ovarian Cancer                                                                                                                                                         | Biological: Bevacizumab Drug: Cyclophosphamide Other: Laboratory Biomarker Analysis                                                                                                                                                                                                                                                                                                                | Median Time to Progression Response Rate Based on the RECIST Median Overall Survival                                                                                                                                                                                                                                                                                                                                                                                                                                                                                                                                                                                                                                                                                                                                                                                                                                                                                                                                                                                                                                                                                                                                                                                                                                                                                  | Phase 2       | 70  | 3-Dec     | 12-May-15 |
| VEGF inhibitor | NCT00119262 | Bevacizumab and Combination Chemotherapy in Patients With Lymph Node Positive Breast Cancer                                                  | Completed | Male Breast Cancer Stage II Breast Cancer Stage IIIA Breast Cancer Stage IIIB Breast Cancer                                                                                                                                              | Drug: doxorubicin hydrochloride Drug: cyclophosphamide Biological: bevacizumab Drug: paclitaxel Biological: filgrastim Biological: pegfilgrastim Radiation: radiation therapy Drug: tamoxifen citrate Drug: aromatase inhibition therapy                                                                                                                                                           | Congestive Heart Failure Rate Proportion of Patients With Absolute Decrease in Left Ventricular Ejection Fraction (LVEF) Levels Post Doxorubicin and Cyclophosphamide(AC) Proportion of Patients With Absolute Decrease in LVEF Levels Post Bevacizumab                                                                                                                                                                                                                                                                                                                                                                                                                                                                                                                                                                                                                                                                                                                                                                                                                                                                                                                                                                                                                                                                                                               | Phase 2       | 226 | 5-Oct     | 15-May-14 |
| VEGF inhibitor | NCT01258855 | Aldesleukin With or Without Ziv-Afibercept in Treating Patients With Stage III-IV Melanoma That Cannot Be Removed by Surgery                 | Completed | Metastatic Melanoma Recurrent Melanoma Stage III Cutaneous Melanoma AJCC v7 Stage IIIA Cutaneous Melanoma AJCC v7 Stage IIIB Cutaneous Melanoma AJCC v7 Stage IIIC Cutaneous Melanoma AJCC v7 Stage IV Cutaneous Melanoma AJCC v6 and v7 | Biological: Aldesleukin Other: Laboratory Biomarker Analysis Biological: Ziv-Afibercept                                                                                                                                                                                                                                                                                                            | Progression-free Survival Overall Survival Response Rate Count of Participants With Adverse Events Progression-free Survival for Patients With High Vascular Endothelial Growth Factor (VEGF) Levels Progression-free Survival for Patients With Low VEGF Levels                                                                                                                                                                                                                                                                                                                                                                                                                                                                                                                                                                                                                                                                                                                                                                                                                                                                                                                                                                                                                                                                                                      | Phase 2       | 84  | 18-Jan-11 | 10-May-19 |
| VEGF inhibitor | NCT00117299 | PTK787/ZK222584 in the Treatment of Metastatic Gastrointestinal Stromal Tumors Resistant to Imatinib                                         | Completed | Sarcoma                                                                                                                                                                                                                                  | Drug: PTK787/ZK222584                                                                                                                                                                                                                                                                                                                                                                              | Response rate                                                                                                                                                                                                                                                                                                                                                                                                                                                                                                                                                                                                                                                                                                                                                                                                                                                                                                                                                                                                                                                                                                                                                                                                                                                                                                                                                         | Phase 2       | 45  | 4-Sep     | 27-May-10 |
| VEGF inhibitor | NCT00504959 | Safety and Tolerability of Ranibizumab in Patients With Subfoveal Choroidal Neovascularization Secondary to Age-related Macular Degeneration | Completed | Subfoveal Choroidal Neovascularization (CNV) Secondary to Age-related Macular Degeneration (AMD)                                                                                                                                         | Drug: ranibizumab                                                                                                                                                                                                                                                                                                                                                                                  | Safety assessed by incidence and severity of treatment emergent ocular and non-ocular adverse events over 24 month study period with ranibizumab monthly prn (0.5mg/0.05ml) Efficacy assessed by mean change in BCVA from Baseline at M 6, 12, 18, and 24. Number of injections with ranibizumab. Safety assessed by AEs and SAEs leading to premature discont. of study drug, vital signs, and ophthalmic exams.                                                                                                                                                                                                                                                                                                                                                                                                                                                                                                                                                                                                                                                                                                                                                                                                                                                                                                                                                     | Phase 4       | 234 | 7-Jul     | 4-Mar-16  |
| VEGF inhibitor | NCT00542971 | Phase I-II Study of Idarubicin, Cytarabine, and Sorafenib (BAY43-                                                                            | Completed | AML Acute Myeloid Leukemia Myelodysplastic Disorders                                                                                                                                                                                     | Drug: Idarubicin Drug: Sorafenib Drug: Ara-C                                                                                                                                                                                                                                                                                                                                                       | Maximum Tolerated Dose (MTD) Number of Participants With Complete Response                                                                                                                                                                                                                                                                                                                                                                                                                                                                                                                                                                                                                                                                                                                                                                                                                                                                                                                                                                                                                                                                                                                                                                                                                                                                                            | Phase 1 Phase | 78  | 7-Oct     | 23-Aug-18 |
| VEGF inhibitor | NCT00126490 | Bevacizumab and Interleukin-2 in Treating Patients With Metastatic Kidney Cancer                                                             | Completed | Recurrent Renal Cell Carcinoma Stage IV Renal Cell Cancer                                                                                                                                                                                | Biological: Aldesleukin Biological: Bevacizumab Other: Laboratory Biomarker Analysis                                                                                                                                                                                                                                                                                                               | Number of Evaluable Participants With Complete Response (CR) and Partial Response (PR) at One Year Number of Evaluable Participants With Overall Survival (OS) at 2 Years Number of Evaluable Participants With Progression Free Survival (PFS) Pearson Correlation Coefficients of Dendritic Cell (DC):Immature Cell (ImC) Ratio With DC Function Number of Participants With Possibly Related Serious Adverse Events (SAEs)                                                                                                                                                                                                                                                                                                                                                                                                                                                                                                                                                                                                                                                                                                                                                                                                                                                                                                                                         | Phase 2       | 19  | 5-Mar     | 30-Jun-15 |

|                |             |                                                                                                                                                                         |           |                                                                                                                                                                                                                                                                                                                                                                                                                                                                                                                                                                                                                                                                                                                                                                                                                                                                                                                                                                                                                                                                                                                                                                                                                                                                                                            |                                                                                                                                                                        |                                                                                                                                                                                                                                                                                                                                                                                                                                                                                                                   |                 |     |           |           |
|----------------|-------------|-------------------------------------------------------------------------------------------------------------------------------------------------------------------------|-----------|------------------------------------------------------------------------------------------------------------------------------------------------------------------------------------------------------------------------------------------------------------------------------------------------------------------------------------------------------------------------------------------------------------------------------------------------------------------------------------------------------------------------------------------------------------------------------------------------------------------------------------------------------------------------------------------------------------------------------------------------------------------------------------------------------------------------------------------------------------------------------------------------------------------------------------------------------------------------------------------------------------------------------------------------------------------------------------------------------------------------------------------------------------------------------------------------------------------------------------------------------------------------------------------------------------|------------------------------------------------------------------------------------------------------------------------------------------------------------------------|-------------------------------------------------------------------------------------------------------------------------------------------------------------------------------------------------------------------------------------------------------------------------------------------------------------------------------------------------------------------------------------------------------------------------------------------------------------------------------------------------------------------|-----------------|-----|-----------|-----------|
| VEGF inhibitor | NCT00650923 | Aflibercept, Radiation Therapy, and Temozolomide in Treating Patients With Newly Diagnosed or Recurrent Glioblastoma Multiforme, Gliosarcoma, or Other Malignant Glioma | Completed | Adult Anaplastic Astrocytoma Adult Anaplastic Oligodendroglioma Adult Giant Cell Glioblastoma Adult Glioblastoma Adult Gliosarcoma Adult Mixed Glioma Recurrent Adult Brain Tumor                                                                                                                                                                                                                                                                                                                                                                                                                                                                                                                                                                                                                                                                                                                                                                                                                                                                                                                                                                                                                                                                                                                          | Drug: ziv-aflibercept Procedure: radiation therapy Drug: temozolomide Procedure: pharmacological study Procedure: laboratory biomarker analysis                        | Maximum tolerated dose of aflibercept defined as the dose at which fewer than one-third of patients experience DLT based on the CTC severity grading Efficacy in terms of antitumor activity based on clinical, radiographic, and biologic assessments Plasma aflibercept (VEGF Trap) concentrations and PK parameters such as Cmax, Tmax, area under the plasma concentration-time curve (AUCo-t and AUC), clearance (CL), apparent volume of distribution at steady state (Vdss), and terminal half-life (t1/2) | Phase 1         | 61  | 8-Jul     | 30-May-14 |
| VEGF inhibitor | NCT00025337 | Combination Chemotherapy With or Without Bevacizumab Compared With Bevacizumab Alone in Treating Patients With Advanced or Metastatic Colorectal Cancer That            | Completed | Adenocarcinoma of the Colon Adenocarcinoma of the Rectum Recurrent Colon Cancer Recurrent Rectal Cancer Stage III Colon Cancer Stage III Rectal Cancer Stage IV Colon Cancer Stage IV Rectal Cancer                                                                                                                                                                                                                                                                                                                                                                                                                                                                                                                                                                                                                                                                                                                                                                                                                                                                                                                                                                                                                                                                                                        | Biological: bevacizumab Drug: oxaliplatin Drug: leucovorin calcium Drug: fluorouracil                                                                                  | Overall survival Response defined using RECIST criteria Progression free survival                                                                                                                                                                                                                                                                                                                                                                                                                                 | Phase 3         | 880 | 1-Sep     | 24-Jan-13 |
| VEGF inhibitor | NCT01212822 | Bevacizumab and Combination Chemotherapy Before Surgery in Treating Patients With Locally Advanced Esophageal or Stomach Cancer                                         | Completed | Adenocarcinoma of the Esophagus Adenocarcinoma of the Gastroesophageal Junction Diffuse Adenocarcinoma of the Stomach Intestinal Adenocarcinoma of the Stomach Mixed Adenocarcinoma of the Stomach Squamous Cell Carcinoma of the Esophagus Stage IA Esophageal Cancer Stage IA Gastric Cancer Stage IB Esophageal Cancer Stage IB Gastric Cancer Stage IIA Esophageal Cancer Stage IIA Gastric Cancer Stage IIB Esophageal Cancer Stage IIB Gastric Cancer Stage IIIA Esophageal Cancer Stage IIIA Gastric Cancer Stage IIIB Esophageal Cancer Stage IIIB Gastric Cancer                                                                                                                                                                                                                                                                                                                                                                                                                                                                                                                                                                                                                                                                                                                                  | Biological: bevacizumab Drug: oxaliplatin Drug: leucovorin calcium Drug: fluorouracil Procedure: therapeutic conventional surgery Other: laboratory biomarker analysis | Disease-free survival Complete and partial response to neoadjuvant therapy based on the Response Evaluation Criteria in Solid Tumors (RECIST) Overall survival Progression free survival Incidence of toxicities, using the National Cancer Institute Common Terminology Criteria for Adverse Events (CTCAE) version (v)4.0 Change in biomarker levels                                                                                                                                                            | Phase 2         | 20  | 27-Apr-11 | 26-Feb-18 |
| VEGF inhibitor | NCT00140556 | Angiogenic and EGFR Blockade With Curative Chemoradiation for Advanced Head and Neck Cancer                                                                             | Completed | Head and Neck Cancer Pharynx Cancer                                                                                                                                                                                                                                                                                                                                                                                                                                                                                                                                                                                                                                                                                                                                                                                                                                                                                                                                                                                                                                                                                                                                                                                                                                                                        | Radiation: Chemoradiotherapy Drug: Cisplatin Drug: Bevacizumab Drug: Erlotinib                                                                                         | Tumor Resolution Local Regional Control Failure Free Survival                                                                                                                                                                                                                                                                                                                                                                                                                                                     | Early Phase 1   | 28  | 5-Aug     | 18-Jan-13 |
| VEGF inhibitor | NCT00021060 | Combination Chemotherapy With or Without Bevacizumab in Treating Patients With Advanced, Metastatic, or Recurrent Non-Small Cell Lung                                   | Completed | Adenocarcinoma of the Lung Bronchoalveolar Cell Lung Cancer Large Cell Lung Cancer Recurrent Non-small Cell Lung Cancer Stage IIIB Non-small Cell Lung Cancer Stage IV Non-small Cell Lung Cancer                                                                                                                                                                                                                                                                                                                                                                                                                                                                                                                                                                                                                                                                                                                                                                                                                                                                                                                                                                                                                                                                                                          | Drug: paclitaxel Drug: carboplatin Biological: bevacizumab Other: laboratory biomarker analysis                                                                        | Survival Grade 4 or 5 toxicities assessed using National Cancer Institute (NCI) Common Terminology Criteria for Adverse Events (CTCAE) version 3.0                                                                                                                                                                                                                                                                                                                                                                | Phase 2 Phase 3 | 842 | 2-Aug     | 27-Feb-13 |
| VEGF inhibitor | NCT01010126 | Temsirolimus and Bevacizumab in Treating Patients With Advanced Endometrial, Ovarian, Liver, Carcinoid, or Islet Cell Cancer                                            | Completed | Adult Hepatocellular Carcinoma Advanced Adult Hepatocellular Carcinoma Endometrial Serous Adenocarcinoma Localized Non-Resectable Adult Liver Carcinoma Lung Carcinoid Tumor Malignant Pancreatic Gastrinoma Malignant Pancreatic Glucagonoma Malignant Pancreatic Insulinoma Malignant Pancreatic Somatostatinoma Metastatic Digestive System Neuroendocrine Tumor G1 Ovarian Carcinosarcoma Ovarian Endometrioid Adenocarcinoma Ovarian Seromucinous Carcinoma Ovarian Serous Surface Papillary Adenocarcinoma Pancreatic Alpha Cell Adenoma Pancreatic Beta Cell Adenoma Pancreatic Delta Cell Adenoma Pancreatic G-Cell Adenoma Pancreatic Polypeptide Tumor Recurrent Adult Liver Carcinoma Recurrent Digestive System Neuroendocrine Tumor G1 Recurrent Fallopian Tube Carcinoma Recurrent Ovarian Carcinoma Recurrent Pancreatic Neuroendocrine Carcinoma Recurrent Primary Peritoneal Carcinoma Recurrent Uterine Corpus Carcinoma Regional Digestive System Neuroendocrine Tumor G1 Stage IIIA Fallopian Tube Cancer Stage IIIA Ovarian Cancer Stage IIIA Primary Peritoneal Cancer Stage IIIA Uterine Corpus Cancer Stage IIIB Fallopian Tube Cancer Stage IIIB Ovarian Cancer Stage IIIB Primary Peritoneal Cancer Stage IIIB Uterine Corpus Cancer Stage IIIC Fallopian Tube Cancer Stage IIIC | Biological: Bevacizumab Drug: Temsirolimus                                                                                                                             | Progression Free Survival Rate Tumor Response Rate Duration of Response Incidence of Adverse Events Overall Survival Time to Disease Progression Time to Treatment Failure                                                                                                                                                                                                                                                                                                                                        | Phase 2         | 252 | 8-Sep-09  | 25-Jan-19 |
| VEGF inhibitor | NCT01782313 | A Phase II Study of Tivozanib in Patients With Metastatic and Non-resectable Soft Tissue Sarcomas                                                                       | Completed | Recurrent Adult Soft Tissue Sarcoma Stage III Adult Soft Tissue Sarcoma Stage IV Adult Soft Tissue Sarcoma                                                                                                                                                                                                                                                                                                                                                                                                                                                                                                                                                                                                                                                                                                                                                                                                                                                                                                                                                                                                                                                                                                                                                                                                 | Drug: tivozanib Other: laboratory biomarker analysis                                                                                                                   | Percentage of Patients With Progression-free Survival at 16 Weeks Overall Response Rate Defined as Complete Response and Partial Response Clinical Benefit Rate as Defined by Complete Response, Partial Response and Stable Disease Overall Survival up to 2 Years Beyond Progression Number of Patients With 0-3 VEGFR1 and VEGFR2 Protein Expression and Time in Days on Treatment Treatment Toxicity as Measured by Adverse Events Experienced While on Treatment During Systematic Assessment.               | Phase 2         | 58  | 6-Mar-13  | 9-Sep-19  |

|                |             |                                                                                                                                                                                                                               |           |                                                                                                                                                                                                                                                                                                                                                                                                                                                                                                                                                                                                                                                                                                                                                                                                                                                                                                                                                                                                                                                                                                                                                                                                                                                                                                                                                                                                                                                                                                                                                                                                                                   |                                                                                                                  |                                                                                                                                                                                                                                                                                                                                                                                                                                                                                                                                                                                                                                                                                                                                                                                                                                                                                                    |                 |     |           |           |
|----------------|-------------|-------------------------------------------------------------------------------------------------------------------------------------------------------------------------------------------------------------------------------|-----------|-----------------------------------------------------------------------------------------------------------------------------------------------------------------------------------------------------------------------------------------------------------------------------------------------------------------------------------------------------------------------------------------------------------------------------------------------------------------------------------------------------------------------------------------------------------------------------------------------------------------------------------------------------------------------------------------------------------------------------------------------------------------------------------------------------------------------------------------------------------------------------------------------------------------------------------------------------------------------------------------------------------------------------------------------------------------------------------------------------------------------------------------------------------------------------------------------------------------------------------------------------------------------------------------------------------------------------------------------------------------------------------------------------------------------------------------------------------------------------------------------------------------------------------------------------------------------------------------------------------------------------------|------------------------------------------------------------------------------------------------------------------|----------------------------------------------------------------------------------------------------------------------------------------------------------------------------------------------------------------------------------------------------------------------------------------------------------------------------------------------------------------------------------------------------------------------------------------------------------------------------------------------------------------------------------------------------------------------------------------------------------------------------------------------------------------------------------------------------------------------------------------------------------------------------------------------------------------------------------------------------------------------------------------------------|-----------------|-----|-----------|-----------|
| VEGF inhibitor | NCT00101348 | Erlotinib and Cetuximab With or Without Bevacizumab in Treating Patients With Metastatic or Unresectable Kidney, Colorectal, Head and Neck, Pancreatic, or Non-Small Cell Lung Cancer                                         | Completed | Metastatic Squamous Neck Cancer With Occult Primary Squamous Cell Carcinoma Recurrent Adenoid Cystic Carcinoma of the Oral Cavity Recurrent Basal Cell Carcinoma of the Lip Recurrent Colon Cancer Recurrent Esthesioneuroblastoma of the Paranasal Sinus and Nasal Cavity Recurrent Inverted Papilloma of the Paranasal Sinus and Nasal Cavity Recurrent Lymphoepithelioma of the Nasopharynx Recurrent Lymphoepithelioma of the Oropharynx Recurrent Metastatic Squamous Neck Cancer With Occult Primary Recurrent Midline Lethal Granuloma of the Paranasal Sinus and Nasal Cavity Recurrent Mucoepidermoid Carcinoma of the Oral Cavity Recurrent Non-small Cell Lung Cancer Recurrent Pancreatic Cancer Recurrent Rectal Cancer Recurrent Salivary Gland Cancer Recurrent Squamous Cell Carcinoma of the Hypopharynx Recurrent Squamous Cell Carcinoma of the Larynx Recurrent Squamous Cell Carcinoma of the Lip and Oral Cavity Recurrent Squamous Cell Carcinoma of the Nasopharynx Recurrent Squamous Cell Carcinoma of the Oropharynx Recurrent Squamous Cell Carcinoma of the Paranasal Sinus and Nasal Cavity Recurrent Verrucous Carcinoma of the Larynx Recurrent Verrucous Carcinoma of the Oral Cavity Stage III Adenoid Cystic Carcinoma of the Oral Cavity Stage III Basal Cell Carcinoma of the Lip Stage III Colon Cancer Stage III Esthesioneuroblastoma of the Paranasal Sinus and Nasal Cavity Stage III Inverted Papilloma of the Paranasal Sinus and Nasal Cavity Stage III Lymphoepithelioma of the Nasopharynx Stage III Lymphoepithelioma of the Oropharynx Stage III Midline Lethal Granuloma of the | Drug: erlotinib hydrochloride Biological: cetuximab Biological: bevacizumab Other: laboratory biomarker analysis | Maximum tolerated dose (MTD) of erlotinib hydrochloride combined with cetuximab determined by dose-limiting toxicities (DLT) graded according to the Common Terminology Criteria for Adverse Events (CTCAE) version 3 (Part I) MTD of bevacizumab combined with cetuximab and erlotinib hydrochloride determined by DLT graded according to the CTCAE version 3 (Part I) Antitumor activity defined as the number and extent (complete or partial) objective responses as well as objective stable disease as measured by RECIST criteria Median time to progression Progression-free survival                                                                                                                                                                                                                                                                                                     | Phase 1 Phase 2 | 66  | 5-Jan     | 11-Jun-14 |
| VEGF inhibitor | NCT01236560 | Vorinostat, Temozolomide, or Bevacizumab in Combination With Radiation Therapy Followed by Bevacizumab and Temozolomide in Young Patients With Newly Diagnosed High-Grade Glioma                                              | Completed | Brain Stem Glioma Cerebral Astrocytoma Childhood Cerebellar Anaplastic Astrocytoma Childhood Cerebral Anaplastic Astrocytoma Childhood Spinal Cord Neoplasm Untreated Childhood Brain Stem Glioma Untreated Childhood Cerebral Astrocytoma                                                                                                                                                                                                                                                                                                                                                                                                                                                                                                                                                                                                                                                                                                                                                                                                                                                                                                                                                                                                                                                                                                                                                                                                                                                                                                                                                                                        | Biological: Bevacizumab Drug: Temozolomide Drug: Vorinostat                                                      | Maximum tolerated dose (MTD) of vorinostat Event-free survival Overall survival Cumulative incidence of disease progression in each treatment arm                                                                                                                                                                                                                                                                                                                                                                                                                                                                                                                                                                                                                                                                                                                                                  | Phase 2 Phase 3 | 101 | 15-Nov-10 | 25-Jan-19 |
| VEGF inhibitor | NCT00079430 | Paclitaxel, Bevacizumab And Adjuvant Intraperitoneal Carboplatin in Treating Patients Who Had Initial Debulking Surgery for Stage II, Stage III, or Stage IV Ovarian Epithelial, Primary Peritoneal, or Fallopian Tube Cancer | Completed | Brenner Tumor Fallopian Tube Cancer Ovarian Clear Cell Cystadenocarcinoma Ovarian Endometrioid Adenocarcinoma Ovarian Mixed Epithelial Carcinoma Ovarian Mucinous Cystadenocarcinoma Ovarian Serous Cystadenocarcinoma Ovarian Undifferentiated Adenocarcinoma Primary Peritoneal Cavity Cancer Stage II Ovarian Epithelial Cancer Stage III Ovarian Epithelial Cancer Stage IV Ovarian Epithelial Cancer                                                                                                                                                                                                                                                                                                                                                                                                                                                                                                                                                                                                                                                                                                                                                                                                                                                                                                                                                                                                                                                                                                                                                                                                                         | Procedure: adjuvant therapy Drug: paclitaxel Drug: carboplatin Biological: bevacizumab                           | Maximum tolerated dose (MTD) of intraperitoneal carboplatin with intravenous paclitaxel, determined according to dose-limiting toxicities (DLTs) graded using Common Terminology Criteria for Adverse Events version 3.0 (CTCAE v3.0) Incidence of adverse events in patients given intraperitoneal carboplatin with intravenous paclitaxel at the MTD, assessed by CTCAE v3.0 Number of observed DLTs in patients given intraperitoneal carboplatin with intravenous paclitaxel and intravenous bevacizumab, graded using CTCAE v3.0 Incidence of adverse events in patients given intraperitoneal carboplatin with intravenous paclitaxel and intravenous bevacizumab, graded using CTCAE v3.0 Response rate (in patients with measurable disease who are in the expanded cohort) assessed by Response Evaluation Criteria in Solid Tumors (RECIST) Progression-free survival assessed by RECIST | Phase 1         | 113 | 4-Jun     | 22-Jul-19 |
| VEGF inhibitor | NCT00516295 | Vincristine Sulfate, Topotecan Hydrochloride, and Cyclophosphamide With or Without Bevacizumab in Treating Young Patients With Refractory or First                                                                            | Completed | Ewing Sarcoma of Bone Extrasosseous Ewing Sarcoma Peripheral Primitive Neuroectodermal Tumor Recurrent Ewing Sarcoma Peripheral Primitive Neuroectodermal Tumor                                                                                                                                                                                                                                                                                                                                                                                                                                                                                                                                                                                                                                                                                                                                                                                                                                                                                                                                                                                                                                                                                                                                                                                                                                                                                                                                                                                                                                                                   | Drug: topotecan hydrochloride Drug: vincristine sulfate Drug: cyclophosphamide Biological: bevacizumab           | The Occurrence of Limiting Toxicity in an Eligible and Evaluable Patient Time to Disease Progression in Patients Receiving VTC With or Without Bevacizumab                                                                                                                                                                                                                                                                                                                                                                                                                                                                                                                                                                                                                                                                                                                                         | Phase 2         | 7   | 8-Feb     | 2-Sep-14  |

|                |             |                                                                                                                    |           |                                                                                                                                                                       |                                                                                                                                                          |                                                                                                                                                                                                                                                                                                                                                                                                                                                                                                                                                                                                                                                                                                                                                                                                                                                                                                                                                                                                                                                                                                                                                                                                                                                                                                                                                                                                                                                                                                                                                                                                                                                                                                                                                                        |         |     |          |           |
|----------------|-------------|--------------------------------------------------------------------------------------------------------------------|-----------|-----------------------------------------------------------------------------------------------------------------------------------------------------------------------|----------------------------------------------------------------------------------------------------------------------------------------------------------|------------------------------------------------------------------------------------------------------------------------------------------------------------------------------------------------------------------------------------------------------------------------------------------------------------------------------------------------------------------------------------------------------------------------------------------------------------------------------------------------------------------------------------------------------------------------------------------------------------------------------------------------------------------------------------------------------------------------------------------------------------------------------------------------------------------------------------------------------------------------------------------------------------------------------------------------------------------------------------------------------------------------------------------------------------------------------------------------------------------------------------------------------------------------------------------------------------------------------------------------------------------------------------------------------------------------------------------------------------------------------------------------------------------------------------------------------------------------------------------------------------------------------------------------------------------------------------------------------------------------------------------------------------------------------------------------------------------------------------------------------------------------|---------|-----|----------|-----------|
| VEGF inhibitor | NCT01005355 | Study of IMC-1121B in Patients With Advanced Solid Tumors                                                          | Completed | Advanced Solid Tumors                                                                                                                                                 | Biological: IMC-1121B                                                                                                                                    | Number of Participants With Drug-Related Adverse Events IMC-1121B Pharmacokinetics: Maximum Serum Concentration (Cmax) - Cohorts 1 and 2 During Cycles 1 and 2 IMC-1121B Pharmacokinetics: Maximum Serum Concentration (Cmax) - Cohorts 1 and 2 During Cycles 3 to 5 IMC-1121B Pharmacokinetics: Area Under the Concentration (AUC) Versus Time Curve - Cohorts 1 and 2 During Cycles 1 and 2 IMC-1121B Pharmacokinetics: Area Under the Concentration (AUC) - Cohorts 1 and 2 During Cycles 3 to 5 IMC-1121B Pharmacokinetics: Half-Life (t1/2) - Cohorts 1 and 2 During Cycles 1 and 2 IMC-1121B Pharmacokinetics: Half-Life (t1/2) - Cohorts 1 and 2 During Cycles 3 to 5 IMC-1121B Pharmacokinetics: Steady State Volume of Distribution (Vss) - Cohorts 1 and 2 During Cycles 1 and 2 IMC-1121B Pharmacokinetics: Steady State Volume of Distribution (Vss) - Cohorts 1 and 2 During Cycles 3 to 5 IMC-1121B Pharmacokinetics: Maximum Serum Concentration (Cmax) - Cohort 3 During Cycles 1 and 2 IMC-1121B Pharmacokinetics: Maximum Serum Concentration (Cmax) - Cohort 3 During Cycles 3 to 5 IMC-1121B Pharmacokinetics: Area Under the Concentration (AUC) - Cohort 3 During Cycles 1 and 2 IMC-1121B Pharmacokinetics - Area Under the Concentration (AUC) - Cohort 3 During Cycles 3 to 5 IMC-1121B Pharmacokinetics: Half-Life (t1/2) - Cohort 3 During Cycles 1 and 2 IMC-1121B Pharmacokinetics: Half-Life (t1/2) - Cohort 3 During Cycles 3 to 5 IMC-1121B Pharmacokinetics: Steady State Volume of Distribution (Vss) - Cohort 3 During Cycles 1 and 2 IMC-1121B Pharmacokinetics: Steady State Volume of Distribution (Vss) - Cohort 3 During Cycles 3 to 5 Screen for the Development of Circulating Antibodies Against IMC-1121B (Immunogenicity) | Phase 1 | 15  | 9-Sep    | 18-Jun-14 |
| VEGF inhibitor | NCT01727089 | Bevacizumab With or Without TRC105 in Treating Patients With Metastatic Kidney Cancer                              | Completed | Clear Cell Renal Cell Carcinoma Recurrent Renal Cell Carcinoma Stage IV Renal Cell Cancer Type 1 Papillary Renal Cell Carcinoma Type 2 Papillary Renal Cell Carcinoma | Biological: Anti-Endoglin Chimeric Monoclonal Antibody TRC105 Biological: Bevacizumab Other: Laboratory Biomarker Analysis Other: Pharmacological Study  | Progression-free Survival at 24 Weeks Progression-free Survival at 12 Weeks Number of Participants With Grade 3 and Above Adverse Events (AE) Related to Treatment Number of Participants With Overall Response                                                                                                                                                                                                                                                                                                                                                                                                                                                                                                                                                                                                                                                                                                                                                                                                                                                                                                                                                                                                                                                                                                                                                                                                                                                                                                                                                                                                                                                                                                                                                        | Phase 2 | 59  | 1-Nov-12 | 28-Aug-18 |
| VEGF inhibitor | NCT00088894 | Gemcitabine With or Without Bevacizumab in Treating Patients With Locally Advanced or Metastatic Pancreatic Cancer | Completed | Adenocarcinoma of the Pancreas Recurrent Pancreatic Cancer Stage II Pancreatic Cancer Stage III Pancreatic Cancer Stage IV Pancreatic Cancer                          | Drug: gemcitabine hydrochloride Biological: bevacizumab Other: placebo Other: laboratory biomarker analysis Other: pharmacogenomic pharmacological study | Overall survival (OS) Discrepancies in the response rate between the two genotypic groups (CT/TT or CC) (Pharmacogenetics portion) Grade 3-4 neutropenia in terms of specific single-nucleotide polymorphisms (SNPs) and/or copy number variations that are associated with the prevalence of these events (Clinical endpoint) Objective response (complete or partial [CR/PR]) Duration of response Progression-free survival (PFS) Toxicity graded according to the National Cancer Institute Common Terminology Criteria for Adverse Events (NCI CTCAE) v3.0 Quantitative interaction between the genotypes (group 1 or 2) and the treatment arm (gemcitabine or gemcitabine + bevacizumab) in modeling response (Pharmacogenetics portion) Objective response (PR/CR versus stable disease [SD]/progressive disease [PD]) (Clinical endpoint) Disease-control (PR/CR/SD versus PD) (Clinical endpoint) OS (Clinical endpoint)                                                                                                                                                                                                                                                                                                                                                                                                                                                                                                                                                                                                                                                                                                                                                                                                                                      | Phase 3 | 590 | 4-Jun    | 5-Jun-13  |

|                |             |                                                                                                                                                                                                                                                          |           |                                                                                                                                                                                                                                                                                                                                                                                                                                  |                                                                                                                     |                                                                                                                                                                                                                                                                                                                                                                                                                                                                                                                                                                                                                                                                                                                                                                                                                                                                                                                                                                                                                                                                                                                                                                                                                                                                                                                                                                                                                                                                                                                                                                                                                                                                                                                                                                                                                                                                                                                                                                                                                                                                                                                                                                                                                                                                                                                                                       |         |    |           |           |
|----------------|-------------|----------------------------------------------------------------------------------------------------------------------------------------------------------------------------------------------------------------------------------------------------------|-----------|----------------------------------------------------------------------------------------------------------------------------------------------------------------------------------------------------------------------------------------------------------------------------------------------------------------------------------------------------------------------------------------------------------------------------------|---------------------------------------------------------------------------------------------------------------------|-------------------------------------------------------------------------------------------------------------------------------------------------------------------------------------------------------------------------------------------------------------------------------------------------------------------------------------------------------------------------------------------------------------------------------------------------------------------------------------------------------------------------------------------------------------------------------------------------------------------------------------------------------------------------------------------------------------------------------------------------------------------------------------------------------------------------------------------------------------------------------------------------------------------------------------------------------------------------------------------------------------------------------------------------------------------------------------------------------------------------------------------------------------------------------------------------------------------------------------------------------------------------------------------------------------------------------------------------------------------------------------------------------------------------------------------------------------------------------------------------------------------------------------------------------------------------------------------------------------------------------------------------------------------------------------------------------------------------------------------------------------------------------------------------------------------------------------------------------------------------------------------------------------------------------------------------------------------------------------------------------------------------------------------------------------------------------------------------------------------------------------------------------------------------------------------------------------------------------------------------------------------------------------------------------------------------------------------------------|---------|----|-----------|-----------|
| VEGF inhibitor | NCT00381797 | Bevacizumab and Irinotecan in Treating Young Patients With Recurrent, Progressive, or Refractory Glioma, Medulloblastoma, Ependymoma, or Low Grade Glioma                                                                                                | Completed | Childhood Cerebral Anaplastic Astrocytoma Childhood Oligodendroglioma Childhood Spinal Cord Neoplasm Recurrent Childhood Brain Stem Glioma Recurrent Childhood Ependymoma Recurrent Childhood Medulloblastoma                                                                                                                                                                                                                    | Biological: Bevacizumab Radiation: Fludeoxyglucose F-18 Drug: Irinotecan Hydrochloride                              | Objective Response Rate Sustained for 10 Weeks Sustained Disease Stabilization Rate Associated With Bevacizumab and Irinotecan in Patients With Recurrent or Progressive Low-grade Glioma (Stratum E) Number of Study Participants With Grade 3 or 4 Treatment-related Toxicity Cumulative Incidence of Sustained Objective Responses Progression-free Survival Change in Perfusion Ratio Between the Baseline and Day 15 Brain Imaging Change in Diffusion Ratio Between the Baseline and Day 15 Brain Image Association of Log-transformed Tumor Volume Based on FLAIR With Progression-free Survival (PFS) Using Hazard Ratio Estimates Association of Log-transformed Tumor Enhancing Volume With Progression-free Survival (PFS) Using Hazard Ratio Estimates Association of Log-transformed Volume of Cystic Necrosis With Progression-free Survival (PFS) Using Hazard Ratio Estimates Association of Log-transformed Tumor Diffusion Ratio With Progression-free Survival (PFS) Using Hazard Ratio Estimates Association of Log-transformed Tumor Perfusion Ratio With Progression-free Survival (PFS) Using Hazard Ratio Estimates Volume of Distribution Systemic Clearance Terminal Half-life Change in Vascular Endothelial Growth Factor Receptor-2 (VEGF-R2) Expression in Peripheral Blood Mononuclear Cells (PBMC) From Baseline to Day-15 Descriptive Statistics for the Changes in Vascular Endothelial Growth Factor Receptor-2 (VEGF-R2) Expression in Peripheral Blood Mononuclear Cells (PBMC) Concurrently Measured With the Changes in Perfusion From Magnetic Resonance Imaging Descriptive Statistics for the Change of Perfusion in Magnetic Resonance Imaging Concurrently Measured With the Change in Vascular Endothelial Growth Factor Receptor-2 (VEGF-R2) Expression in Peripheral Blood Mononuclear Cells (PBMC) Correlation of the Change in Vascular Endothelial Growth Factor Receptor-2 (VEGF-R2) Expression in Peripheral Blood Mononuclear Cells (PBMC) From Baseline With the Change in Perfusion From Magnetic Resonance Imaging Number of Patients With High Hypoxia Inducible Factor-2alpha Expression at Baseline Number of Patients With High Carbonic Anhydrase 9 Expression at Baseline Number of Patients With High VEGF-A Expression at Baseline Number of Patients With High VEGF-R2 Expression at | Phase 2 | 97 | 6-Aug     | 28-Nov-17 |
| VEGF inhibitor | NCT00100841 | Phase II Trial of FOLFOX6, Bevacizumab and Cetuximab in Patients With Colorectal Cancer                                                                                                                                                                  | Completed | Adenocarcinoma of the Rectum Mucinous Adenocarcinoma of the Colon Recurrent Colon Cancer Recurrent Rectal Cancer Signet Ring Adenocarcinoma of the Colon Stage IV Colon                                                                                                                                                                                                                                                          | Biological: cetuximab Biological: bevacizumab Drug: oxaliplatin Drug: leucovorin calcium Drug: fluorouracil         | Severe Adverse Event (SAE) Rate Progression Free Survival Rate                                                                                                                                                                                                                                                                                                                                                                                                                                                                                                                                                                                                                                                                                                                                                                                                                                                                                                                                                                                                                                                                                                                                                                                                                                                                                                                                                                                                                                                                                                                                                                                                                                                                                                                                                                                                                                                                                                                                                                                                                                                                                                                                                                                                                                                                                        | Phase 2 | 66 | 4-Nov     | 27-Jul-15 |
| VEGF inhibitor | NCT00271609 | Bevacizumab for Recurrent Malignant Glioma                                                                                                                                                                                                               | Completed | Recurrent High-Grade Gliomas Malignant Gliomas                                                                                                                                                                                                                                                                                                                                                                                   | Drug: Bevacizumab                                                                                                   | Percentage of Participants With Progression Free Survival at 6 Months. Number of Participants With Adverse Events                                                                                                                                                                                                                                                                                                                                                                                                                                                                                                                                                                                                                                                                                                                                                                                                                                                                                                                                                                                                                                                                                                                                                                                                                                                                                                                                                                                                                                                                                                                                                                                                                                                                                                                                                                                                                                                                                                                                                                                                                                                                                                                                                                                                                                     | Phase 2 | 88 | 5-Dec     | 29-Apr-14 |
| VEGF inhibitor | NCT01894061 | NovoTTF-100A With Bevacizumab (Avastin) in Patients With Recurrent Glioblastoma                                                                                                                                                                          | Completed | Adult Giant Cell Glioblastoma Adult Glioblastoma Adult Gliosarcoma Recurrent Adult Brain Tumor                                                                                                                                                                                                                                                                                                                                   | Biological: Bevacizumab Device: NovoTTF-100A Other: Quality of Life Assessment                                      | Progression Free Survival (PFS) Objective response rate based on RANO Criteria Number of patients that experience toxicities with this combination of therapies Median overall survival To assess time-to-progression Neurocognitive function                                                                                                                                                                                                                                                                                                                                                                                                                                                                                                                                                                                                                                                                                                                                                                                                                                                                                                                                                                                                                                                                                                                                                                                                                                                                                                                                                                                                                                                                                                                                                                                                                                                                                                                                                                                                                                                                                                                                                                                                                                                                                                         | Phase 2 | 25 | 12-Jun-13 | 10-Jan-20 |
| VEGF inhibitor | NCT00410605 | Bevacizumab, Lenalidomide, and Dexamethasone in Patients With Relapsed or Refractory Stage II or III Multiple Myeloma                                                                                                                                    | Completed | Multiple Myeloma in Relapse Stage II Multiple Myeloma Stage III Multiple Myeloma                                                                                                                                                                                                                                                                                                                                                 | Biological: bevacizumab Drug: lenalidomide Drug: dexamethasone                                                      | Confirmed Anti-tumor Response Rate (Complete Response and Partial Response) to the Combination of Bevacizumab and Lenalidomide Progression Free Survival (Time to Progression) Toxicity and Tolerability of the Bevacizumab and Lenalidomide Combination Effect of Bev/Rev on Markers of Myeloma Activity in Myeloma Cells and Stromal Cells at Baseline Local Cytokine Milieu Using Tissue Micro Arrays of Bone Marrow Biopsy Specimens Effect of Bev/Rev on Markers of Myeloma Activity in Myeloma Cells                                                                                                                                                                                                                                                                                                                                                                                                                                                                                                                                                                                                                                                                                                                                                                                                                                                                                                                                                                                                                                                                                                                                                                                                                                                                                                                                                                                                                                                                                                                                                                                                                                                                                                                                                                                                                                            | Phase 2 | 39 | 6-Nov     | 1-Sep-17  |
| VEGF inhibitor | NCT00060411 | A Phase I, Pharmacological, and Biological Study of OSI-774 in Combination With FOLFOX 4 (5-FU, Leucovorin, and Oxaliplatin) and Bevacizumab (Avastin) in Patients With Advanced Colorectal Cancer                                                       | Completed | Mucinous Adenocarcinoma of the Colon Mucinous Adenocarcinoma of the Rectum Recurrent Colon Cancer Recurrent Rectal Cancer Signet Ring Adenocarcinoma of the Colon Signet Ring Adenocarcinoma of the Rectum Stage IIIA Colon Cancer Stage IIIB Rectal Cancer Stage IIIB Colon Cancer Stage IIIB Rectal Cancer Stage IIIC Colon Cancer Stage IIIC Rectal Cancer Stage IVA Colon Cancer                                             | Drug: erlotinib hydrochloride Drug: fluorouracil Drug: leucovorin calcium Drug: oxaliplatin Biological: bevacizumab | Maximum tolerated dose (MTD) of OSI-774 given in combination with FOLFOX 4 and Bevacizumab, in patients with advanced colorectal cancer Toxicity profile of this regimen evaluated using the NCI Common Toxicity Criteria Version 2.0 Antitumor activity of this combination determined using the RECIST criteria Overall survival Progression-free survival The relationship between CYP3A4 activity and OSI-774 clearance Pharmacokinetics of OSI-774 given with FOLFOX 4, and Bevacizumab                                                                                                                                                                                                                                                                                                                                                                                                                                                                                                                                                                                                                                                                                                                                                                                                                                                                                                                                                                                                                                                                                                                                                                                                                                                                                                                                                                                                                                                                                                                                                                                                                                                                                                                                                                                                                                                          | Phase 1 | 24 | 3-Jun     | 30-Sep-13 |
| VEGF inhibitor | NCT00085358 | Carboplatin and Paclitaxel With or Without Bevacizumab Compared to Docetaxel, Carboplatin, and Paclitaxel in Treating Patients With Stage II, Stage III, or Stage IV Ovarian Epithelial, Fallopian Tube, or Primary Peritoneal Cavity Carcinoma (Cancer) | Completed | Brenner Tumor Fallopian Tube Cancer Ovarian Carcinosarcoma Ovarian Clear Cell Cystadenocarcinoma Ovarian Endometrioid Adenocarcinoma Ovarian Mixed Epithelial Carcinoma Ovarian Mucinous Cystadenocarcinoma Ovarian Serous Cystadenocarcinoma Ovarian Undifferentiated Adenocarcinoma Primary Peritoneal Cavity Cancer Stage II Ovarian Epithelial Cancer Stage III Ovarian Epithelial Cancer Stage IV Ovarian Epithelial Cancer | Drug: carboplatin Drug: paclitaxel Drug: docetaxel Biological: bevacizumab                                          | Maximum tolerated dose (MTD) of IV paclitaxel with IP carboplatin followed by IP paclitaxel, determined according to dose-limiting toxicities (DLTs) graded using Common Terminology Criteria for Adverse Events version 3.0 (CTCAE v3.0) MTD of IV docetaxel with IP carboplatin followed by IP paclitaxel, determined according to dose-limiting toxicities (DLTs) graded using CTCAE v3.0 MTD of IV paclitaxel with IP carboplatin and IV bevacizumab followed by IP paclitaxel, determined according to dose-limiting toxicities (DLTs) graded using CTCAE v3.0 Incidence of adverse events in patients given IV paclitaxel with IP carboplatin followed by IP paclitaxel at the MTD, assessed by CTCAE v3.0 Incidence of adverse events in patients given IV docetaxel with IP carboplatin followed by IP paclitaxel at the MTD, assessed by CTCAE v3.0 Incidence of adverse events in patients given IV paclitaxel with IP carboplatin and IV bevacizumab followed by                                                                                                                                                                                                                                                                                                                                                                                                                                                                                                                                                                                                                                                                                                                                                                                                                                                                                                                                                                                                                                                                                                                                                                                                                                                                                                                                                                           | Phase 1 | 40 | 4-May     | 22-Jul-19 |

|                |             |                                                                                                                                                 |           |                                                                                                                                                                                                                          |                                                                                                                                                                                                                   |                                                                                                                                                                                                                                                                                                                                                                                                                                                                                                                                                                                                                                                                                                      |                 |      |           |           |
|----------------|-------------|-------------------------------------------------------------------------------------------------------------------------------------------------|-----------|--------------------------------------------------------------------------------------------------------------------------------------------------------------------------------------------------------------------------|-------------------------------------------------------------------------------------------------------------------------------------------------------------------------------------------------------------------|------------------------------------------------------------------------------------------------------------------------------------------------------------------------------------------------------------------------------------------------------------------------------------------------------------------------------------------------------------------------------------------------------------------------------------------------------------------------------------------------------------------------------------------------------------------------------------------------------------------------------------------------------------------------------------------------------|-----------------|------|-----------|-----------|
| VEGF inhibitor | NCT00917384 | Study of IMC-1121B (Ramucirumab) With Best Supportive Care in Participants With Gastric Cancer and Adenocarcinoma                               | Completed | Gastric Cancer Adenocarcinoma                                                                                                                                                                                            | Biological: ramucirumab Drug: Placebo Other: Best Supportive Care (BSC)                                                                                                                                           | Overall Survival (OS) Progression-Free Survival (PFS) Percentage of Participants Who Are Progression-Free at Week 12 (PFS Rate) Percentage of Participants With Objective Response (Objective Response Rate [ORR]) Duration of Response (DOR) Change From Baseline in Quality of Life (QoL) as Measured by the European Organisation for Research and Treatment of Cancer Questionnaire (EORTC-QLQ-C30) Number of Participants With Adverse Events Maximum Concentration (Cmax) of IMC-1121B Number of Participants Who Developed Antibodies Against IMC-1121B                                                                                                                                       | Phase 3         | 355  | 9-Aug     | 25-Sep-19 |
| VEGF inhibitor | NCT01576380 | A Phase II Study to Evaluate Efficacy and Safety of Dovitinib (TKI258) in Advanced Scirrhous Gastric Carcinoma Patients                         | Completed | Adenocarcinoma, Scirrhous Linitis Plastica Stomach Neoplasms Stomach Diseases Neoplasms by Site Neoplasms                                                                                                                | Drug: TKI258                                                                                                                                                                                                      | disease control rate (DCR) time to progression (TTP) overall response rate (ORR) progression free survival (PFS) overall survival (OS) disease control rate (DCR) per independent central review time to progression (TTP) per independent central review Safety and tolerability of TKI258 Plasma concentrations of TKI258 overall response rate (ORR) per independent central review progression free survival (PFS) per independent central review                                                                                                                                                                                                                                                | Phase 2         | 11   | 12-Jun    | 27-Feb-17 |
| VEGF inhibitor | NCT01648348 | Bevacizumab With or Without Anti-Endoglin Monoclonal Antibody TRC105 in Treating Patients With Recurrent Glioblastoma Multiforme                | Completed | Adult Anaplastic Astrocytoma Adult Anaplastic Oligodendroglioma Adult Giant Cell Glioblastoma Adult Glioblastoma Adult Gliosarcoma Adult Mixed Glioma Recurrent Adult Brain Neoplasm                                     | Biological: Anti-Endoglin Chimeric Monoclonal Antibody TRC105 Biological: Bevacizumab Other: Laboratory Biomarker Analysis Other: Pharmacological Study Other: Quality-of-Life Assessment                         | Maximum Tolerated Dose (MTD) (Phase I) as Measured by the Number of Participants With Dose Limiting Toxicities Progression-free Survival (PFS) (Phase II) Overall Toxicity Rate for Grade 3 or Higher Adverse Events Considered at Least Possibly Related to Treatment (Phase II) Overall Survival (Phase II) Progression Free Survival at 6 Months (PFS6) (Phase II) as Measured by the Percentage of Participants With Progression Free Survival at 6 Months Quality of Life (QOL) as Assessed by the EORTC QLQ-C15-PAL Questionnaire [Item 15: Global Health Status/Quality of Life] (Phase II) QOL Assessed by EORTC-QLQ-BN20 Patient Questionnaire [Items 1-20] (Phase II) QOL Assessed by WIWI | Phase 1 Phase 2 | 116  | 12-Nov    | 23-May-18 |
| VEGF inhibitor | NCT00084604 | Irinotecan, Cisplatin, and Bevacizumab in Treating Patients With Unresectable or Metastatic Gastric or Gastroesophageal Junction Adenocarcinoma | Completed | Adenocarcinoma of the Gastroesophageal Junction Diffuse Adenocarcinoma of the Stomach Intestinal Adenocarcinoma of the Stomach Mixed Adenocarcinoma of the Stomach Recurrent Gastric Cancer Stage IIIA Gastric           | Drug: irinotecan hydrochloride Biological: bevacizumab Drug: cisplatin Procedure: computed tomography Other: laboratory biomarker analysis                                                                        | Time to progression, evaluated using RECIST Overall response rate, evaluated using RECIST Complete response rate, evaluated using RECIST Duration of response, evaluated using RECIST Survival Incidence of toxicity, evaluated using CTCAE version 3.0                                                                                                                                                                                                                                                                                                                                                                                                                                              | Phase 2         | 47   | 4-Apr     | 4-Jun-13  |
| VEGF inhibitor | NCT01243359 | Sunitinib Malate and Bevacizumab in Treating Patients With Kidney Cancer or Advanced Solid Malignancies                                         | Completed | Clear Cell Renal Cell Carcinoma Recurrent Renal Cell Cancer Stage I Renal Cell Cancer Stage II Renal Cell Cancer Stage III Renal Cell Cancer Stage IV Renal Cell Cancer Unspecified Adult Solid Tumor, Protocol Specific | Drug: sunitinib malate Biological: bevacizumab Other: pharmacological study Other: laboratory biomarker analysis Other: fluorine F 18 fluorothymidine Procedure: positron emission tomography Procedure: computed | Proportion of patients with grade 3 or higher toxicities and recommended phase II dose of sunitinib in the presence of bevacizumab or sunitinib alone graded by National Cancer Institute Common Terminology Criteria for Adverse Events version 4.0 Objective response rate using the Response Evaluation Criteria in Solid Tumors (RECIST) Pharmacodynamic change in SUV peak and tumor perfusion using FLT PET/CT Changes in the ration of free-bound plasma VEGF by Enzyme-linked immunosorbent assay (ELISA)                                                                                                                                                                                    | Phase 1         | 6    | 10-Oct    | 2-Apr-14  |
| VEGF inhibitor | NCT00288015 | Bevacizumab in Treating Patients With Angiosarcoma                                                                                              | Completed | Sarcoma                                                                                                                                                                                                                  | Biological: Bevacizumab                                                                                                                                                                                           | Median Progression-free Survival of Patients Treated With the Study Drug as Defined by RECIST Criteria Objective Response Rate in Patients Treated With Bevacizumab Duration of Response Assess the Treatment Effect of Bevacizumab on Duration of Overall Survival Evaluate the Toxicity of Bevacizumab                                                                                                                                                                                                                                                                                                                                                                                             | Phase 2         | 32   | 5-Oct     | 25-Jun-18 |
| VEGF inhibitor | NCT01091792 | Exploratory Study of the Modulation of the Immune System by VEGF Blockade in Patients With Glioblastoma Multiforme (GBM)                        | Completed | Glioblastoma Multiforme                                                                                                                                                                                                  | Drug: Bevacizumab                                                                                                                                                                                                 | Changes in the peripheral blood T-reg profile between pretreatment and 4 weeks after completion of treatment with the addition of bevacizumab to RT and TMZ in patients with glioblastoma Immunologic shift in the phenotypic T cell, B cell, NK cell and DC repertoire induced by RT-TMZ-BEV comparing pretreatment and 4 weeks after completion of                                                                                                                                                                                                                                                                                                                                                 | Early Phase 1   | 13   | 10-Mar    | 25-May-18 |
| VEGF inhibitor | NCT00397982 | Temsirolimus and Bevacizumab in Treating Patients With Stage III or Stage IV Malignant Melanoma                                                 | Completed | Recurrent Melanoma Stage IIIB Skin Melanoma Stage IIIC Skin Melanoma Stage IV Skin Melanoma                                                                                                                              | Biological: Bevacizumab Other: Laboratory Biomarker Analysis Drug: Temsirolimus Procedure: Therapeutic Conventional Surgery                                                                                       | Objective Tumor Response (Complete Response and Partial Response) and Progression in Participants With Stage III or IV Melanoma Following Treatment With Temsirolimus and Bevacizumab Adverse Events in Participants With Stage III or IV Melanoma Treated With Temsirolimus and Bevacizumab Association Between Expression or Activation of One Biomarker With Another, With Biochemical and Clinical Responses, With Alterations in Cell Proliferation and Apoptotic Markers, and With Time to Progression Comparison of Biomarkers to Antitumor Activity Patient Outcomes Comparison of Pre- vs Post-treatment Measurements of Biomarkers and Vascular System/Immune System                       | Phase 2         | 17   | 8-Jan     | 9-Jun-17  |
| VEGF inhibitor | NCT00387751 | Bevacizumab and Sorafenib in Treating Patients With Unresectable Stage III or Stage IV Malignant                                                | Completed | Recurrent Melanoma Stage III Skin Melanoma Stage IV Skin Melanoma                                                                                                                                                        | Biological: Bevacizumab Other: Laboratory Biomarker Analysis Other: Pharmacological Study Drug: Sorafenib Tosylate                                                                                                | Response Safety and Tolerability Survival                                                                                                                                                                                                                                                                                                                                                                                                                                                                                                                                                                                                                                                            | Phase 2         | 14   | 6-Aug     | 22-Nov-17 |
| VEGF inhibitor | NCT00096278 | Fluorouracil, Leucovorin, and Oxaliplatin With or Without Bevacizumab in Treating Patients Who Have Undergone Surgery for                       | Completed | Colon Adenocarcinoma Stage IIA Colon Cancer AJCC v7 Stage IIB Colon Cancer AJCC v7 Stage IIC Colon Cancer AJCC v7 Stage IIIA Colon Cancer AJCC v7 Stage IIIB Colon Cancer AJCC v7 Stage IIIC Colon                       | Biological: Bevacizumab Drug: Fluorouracil Drug: Leucovorin Calcium Drug: Oxaliplatin                                                                                                                             | Disease-free Survival Survival                                                                                                                                                                                                                                                                                                                                                                                                                                                                                                                                                                                                                                                                       | Phase 3         | 2710 | 15-Sep-04 | 30-Jul-19 |

|                |             |                                                                                                                                                                                 |           |                                                                                                                                                                                                                                                                                                                                                                                                                                                                        |                                                                                                                                       |                                                                                                                                                                                                                                                                                                                                                                                                                                                                                                                                                                                                                                                                                                                                                                                                                                                                                                                                                                                                                                                                                                                                                                                    |         |     |           |           |
|----------------|-------------|---------------------------------------------------------------------------------------------------------------------------------------------------------------------------------|-----------|------------------------------------------------------------------------------------------------------------------------------------------------------------------------------------------------------------------------------------------------------------------------------------------------------------------------------------------------------------------------------------------------------------------------------------------------------------------------|---------------------------------------------------------------------------------------------------------------------------------------|------------------------------------------------------------------------------------------------------------------------------------------------------------------------------------------------------------------------------------------------------------------------------------------------------------------------------------------------------------------------------------------------------------------------------------------------------------------------------------------------------------------------------------------------------------------------------------------------------------------------------------------------------------------------------------------------------------------------------------------------------------------------------------------------------------------------------------------------------------------------------------------------------------------------------------------------------------------------------------------------------------------------------------------------------------------------------------------------------------------------------------------------------------------------------------|---------|-----|-----------|-----------|
| VEGF inhibitor | NCT01383343 | Sorafenib Tosylate, Bevacizumab, Irinotecan Hydrochloride, Leucovorin Calcium, and Fluorouracil in Treating Patients With Metastatic Colorectal Cancer                          | Completed | Recurrent Colon Carcinoma Recurrent Rectal Carcinoma Stage IVA Colon Cancer Stage IVA Rectal Cancer Stage IVB Colon Cancer Stage IVB Rectal Cancer                                                                                                                                                                                                                                                                                                                     | Biological: Bevacizumab Drug: Fluorouracil Drug: Hydrochloride Drug: Calcium Drug: Sorafenib Tosylate                                 | Maximum tolerated dose of sorafenib tosylate in combination with FOLFIRI and bevacizumab, defined as the dose level below the lowest dose that induces dose-limiting toxicity in at least one-third of patients (at least 2 of a maximum of 6 new patients) Incidence of adverse events of sorafenib tosylate in combination with bevacizumab and FOLFIRI as assessed by NCI CTCAE v 4.0 Response rate in patients treated with sorafenib tosylate in combination with FOLFIRI and bevacizumab, assessed using Response Evaluation Criteria in Solid Tumors Time to progression Time to treatment failure Time to until treatment related grade 3+ toxicity assessed via CTC standard toxicity grading Time until any treatment related toxicity evaluated via the ordinal Common Toxicity Criteria (CTC) standard toxicity grading Time until hematologic nadirs (ANC, platelets, hemoglobin)                                                                                                                                                                                                                                                                                     | Phase 1 | 17  | 11-Aug    | 19-Apr-17 |
| VEGF inhibitor | NCT00369122 | Bevacizumab, Radiation Therapy, and Cisplatin in Treating Patients With Previously Untreated Locally Advanced Cervical Cancer                                                   | Completed | Cervical Adenocarcinoma Cervical Adenosquamous Carcinoma Cervical Squamous Cell Carcinoma, Not Otherwise Specified Stage IB Cervical Cancer AJCC v6 and v7 Stage IIA Cervical Cancer AJCC v7 Stage IIB Cervical Cancer AJCC v6 and v7 Stage III Cervical Cancer AJCC v6 and v7                                                                                                                                                                                         | Biological: Bevacizumab Drug: Cisplatin Radiation: External Beam Radiation Therapy Radiation: Internal                                | Number of Subjects With Treatment-related Serious Adverse Events (SAEs) and Adverse Events (AEs) as Assessed by CTCAE v. 3.0 Criteria Within the First 90 Days From Treatment Start Number of Subjects With Treatment-related SAEs and AEs as Assessed by CTCAE v. 3.0 Criteria at Any Time Disease-free Survival (Three-year Rate Reported) Overall Survival (Three-year Rate Reported)                                                                                                                                                                                                                                                                                                                                                                                                                                                                                                                                                                                                                                                                                                                                                                                           | Phase 2 | 60  | 11-Aug-06 | 20-Mar-18 |
| VEGF inhibitor | NCT02158520 | Nab-Paclitaxel and Bevacizumab or Ipilimumab as First-Line Therapy in Treating Patients With Stage IV Melanoma That Cannot Be Removed by Surgery                                | Completed | Metastatic Melanoma Mucosal Melanoma Stage IV Cutaneous Melanoma AJCC v6 and v7 Stage IV Uveal Melanoma AJCC v7 Unresectable Melanoma                                                                                                                                                                                                                                                                                                                                  | Biological: Bevacizumab Biological: Ipilimumab Other: Laboratory Biomarker Analysis Drug: Nab-paclitaxel Other: Pharmacological Study | Progression-free Survival (PFS) Overall Survival (OS) Number of Patients With Tumor Response The Number of Patients Who Experienced Toxicity                                                                                                                                                                                                                                                                                                                                                                                                                                                                                                                                                                                                                                                                                                                                                                                                                                                                                                                                                                                                                                       | Phase 2 | 24  | 18-Oct-13 | 21-Jan-20 |
| VEGF inhibitor | NCT00327171 | Study of AVE0005 (VEGF Trap) in Patients With Chemoresistant Advanced Ovarian Cancer                                                                                            | Completed | Neoplasms Cancer of the Ovary                                                                                                                                                                                                                                                                                                                                                                                                                                          | Drug: Aflibercept (ziv-aflibercept, AVE0005, VEGF trap, ZALTRAP) <sup>®</sup>                                                         | Number of Participants With Confirmed Objective Response (OR) as Per Response Evaluation Criteria in Solid Tumors (RECIST) Based on the Analysis by an Independent Review Committee (IRC) - Simon's Cohort Number of Participants With Confirmed Objective Response (OR) as Per Response Evaluation Criteria in Solid Tumors (RECIST) Based on the Analysis by the IRC - Efficacy Evaluable Population Number of Participants With a Clinical Benefit Response (CBR) as Per RECIST Based on the Analysis by the IRC Duration of Response (DR) Based on the Analysis by an Independent Review Committee (IRC) Tumor Marker Response Rate (TMRR) Based on the Gynecologic Cancer Intergroup (GCI) Definition Time to Tumor Progression (TTP) as Per RECIST Based on the Analysis by the IRC Time to Tumor Marker (CA-125) Progression (TTMP) Number of Participants With Disease Progression Events for Progression-free Survival (PFS) Analysis by the IRC Progression-free Survival (PFS) Time Based on Analysis by the IRC Overall Survival (OS) Time Overall Safety - Number of Participants With Adverse Events (AE) Participant's Assessment of Health Related Quality of Life | Phase 2 | 218 | 6-May     | 7-Jun-16  |
| VEGF inhibitor | NCT00016094 | S0108 Bevacizumab in Treating Patients With Non-Hodgkin's Lymphoma                                                                                                              | Completed | Anaplastic Large Cell Lymphoma Recurrent Adult Burkitt Lymphoma Recurrent Adult Diffuse Large Cell Lymphoma Recurrent Mantle Cell Lymphoma                                                                                                                                                                                                                                                                                                                             | Biological: bevacizumab Other: laboratory biomarker analysis                                                                          | Progression-free survival rate in patients treated with single agent bevacizumab                                                                                                                                                                                                                                                                                                                                                                                                                                                                                                                                                                                                                                                                                                                                                                                                                                                                                                                                                                                                                                                                                                   | Phase 2 | 60  | 1-Apr     | 29-Jan-13 |
| VEGF inhibitor | NCT01005329 | Intensity-Modulated Radiation Therapy, Cisplatin, and Bevacizumab Followed by Carboplatin and Paclitaxel in Treating Patients Who Have Undergone Surgery for Endometrial Cancer | Completed | Endometrial Adenocarcinoma Endometrial Adenosquamous Carcinoma Endometrial Clear Cell Adenocarcinoma Endometrial Serous Adenocarcinoma Stage IA Uterine Corpus Cancer AJCC v7 Stage IB Uterine Corpus Cancer AJCC v7 Stage II Uterine Corpus Cancer AJCC v7 Stage IIIA Uterine Corpus Cancer AJCC v7 Stage IIIB Uterine Corpus Cancer AJCC v7 Stage IIIC Uterine Corpus Cancer AJCC v7 Stage IVA Uterine Corpus Cancer AJCC v7 Stage IVB Uterine Corpus Cancer AJCC v7 | Biological: Bevacizumab Drug: Carboplatin Drug: Cisplatin Radiation: Intensity-Modulated Radiation Therapy Drug: Paclitaxel           | Percentage of Participants With Treatment-related, Grade 3+, Non-hematologic Adverse Events Occurring Within 90 Days After Treatment Start Percentage of Participants With Treatment-related, Grade 3+, Non-hematologic Adverse Events Occurring Within 1 Year After Treatment Start Treatment-related Grade 3+ Adverse Events Overall Survival (Two-year Rate Reported) Disease-free Survival (Two-year Rate Reported) Pelvic Failure Rate (Two-year Rate Reported) Distant Failure (Two-year Rate Reported)                                                                                                                                                                                                                                                                                                                                                                                                                                                                                                                                                                                                                                                                      | Phase 2 | 34  | 6-Nov-09  | 15-Mar-18 |



|                |             |                                                                                                                                                                                |           |                                                                                                                                                                                                                                                                                                                                                                                                                                                                                                                                                                                                                                                                                                                                                                                                                                                                                                                                                                                                                                                                                                                                                                                                                                                                                                                                                                                                                                                                                                                                   |                                                                                                                                                          |                                                                                                                                                                                                                                                                                                                                                                                                                                                                                                                                                                                                                                                                      |                 |      |          |           |
|----------------|-------------|--------------------------------------------------------------------------------------------------------------------------------------------------------------------------------|-----------|-----------------------------------------------------------------------------------------------------------------------------------------------------------------------------------------------------------------------------------------------------------------------------------------------------------------------------------------------------------------------------------------------------------------------------------------------------------------------------------------------------------------------------------------------------------------------------------------------------------------------------------------------------------------------------------------------------------------------------------------------------------------------------------------------------------------------------------------------------------------------------------------------------------------------------------------------------------------------------------------------------------------------------------------------------------------------------------------------------------------------------------------------------------------------------------------------------------------------------------------------------------------------------------------------------------------------------------------------------------------------------------------------------------------------------------------------------------------------------------------------------------------------------------|----------------------------------------------------------------------------------------------------------------------------------------------------------|----------------------------------------------------------------------------------------------------------------------------------------------------------------------------------------------------------------------------------------------------------------------------------------------------------------------------------------------------------------------------------------------------------------------------------------------------------------------------------------------------------------------------------------------------------------------------------------------------------------------------------------------------------------------|-----------------|------|----------|-----------|
| VEGF inhibitor | NCT00458731 | Bevacizumab and Cediranib Maleate in Treating Patients With Metastatic or Unresectable Solid Tumor, Lymphoma, Intracranial Glioblastoma, Gliosarcoma or Anaplastic Astrocytoma | Completed | Adult Grade III Lymphomatoid Granulomatosis Adult Nasal Type Extranodal NK/T-cell Lymphoma Anaplastic Large Cell Lymphoma Angioimmunoblastic T-cell Lymphoma Childhood Burkitt Lymphoma Childhood Diffuse Large Cell Lymphoma Childhood Grade III Lymphomatoid Granulomatosis Childhood Immunoblastic Large Cell Lymphoma Childhood Nasal Type Extranodal NK/T-cell Lymphoma Cutaneous B-cell Non-Hodgkin Lymphoma Extranodal Marginal Zone B-cell Lymphoma of Mucosa-associated Lymphoid Tissue Hepatosplenic T-cell Lymphoma Intraocular Lymphoma Nodal Marginal Zone B-cell Lymphoma Noncutaneous Extranodal Lymphoma Peripheral T-cell Lymphoma Progressive Hairy Cell Leukemia, Initial Treatment Recurrent Adult Burkitt Lymphoma Recurrent Adult Diffuse Large Cell Lymphoma Recurrent Adult Diffuse Mixed Cell Lymphoma Recurrent Adult Diffuse Small Cleaved Cell Lymphoma Recurrent Adult Hodgkin Lymphoma Recurrent Adult Immunoblastic Large Cell Lymphoma Recurrent Adult Lymphoblastic Lymphoma Recurrent Adult T-cell Leukemia Lymphoma Recurrent Childhood Anaplastic Large Cell Lymphoma Recurrent Childhood Large Cell Lymphoma Recurrent Childhood Lymphoblastic Lymphoma Recurrent Childhood Small Noncleaved Cell Lymphoma Recurrent Grade 1 Follicular Lymphoma Recurrent Grade 2 Follicular Lymphoma Recurrent Grade 3 Follicular Lymphoma Recurrent Mantle Cell Lymphoma Recurrent Mycosis Fungoides/Sézary Syndrome Recurrent/Refractory Childhood Hodgkin Lymphoma Refractory Hairy Cell Leukemia Small | Biological: bevacizumab Drug: cediranib maleate                                                                                                          | Safety and toxicity profile of combination bevacizumab and cediranib maleate Pharmacokinetic profile of oral cediranib maleate in combination with bevacizumab                                                                                                                                                                                                                                                                                                                                                                                                                                                                                                       | Phase 1         | 57   | 7-May    | 19-Feb-14 |
| VEGF inhibitor | NCT00171587 | Study of the Safety, Tolerability, Pharmacokinetics, and Anti-tumor Effects of Vatalanib in Combination With Capecitabine in Patients With Advanced Cancer                     | Completed | Tumors Neoplasm Metastasis                                                                                                                                                                                                                                                                                                                                                                                                                                                                                                                                                                                                                                                                                                                                                                                                                                                                                                                                                                                                                                                                                                                                                                                                                                                                                                                                                                                                                                                                                                        | Drug: PTK787/ZK 222584 (vatalanib)                                                                                                                       | Safety Tolerability Pharmacokinetics                                                                                                                                                                                                                                                                                                                                                                                                                                                                                                                                                                                                                                 | Phase 1 Phase 2 | 22   | 2-May    | 19-Nov-09 |
| VEGF inhibitor | NCT00262847 | Carboplatin and Paclitaxel With or Without Bevacizumab in Treating Patients With Stage III or Stage IV Ovarian Epithelial, Primary Peritoneal, or Fallopian Tube Cancer        | Completed | Fallopian Tube Clear Cell Adenocarcinoma Fallopian Tube Endometrioid Adenocarcinoma Fallopian Tube Mucinous Adenocarcinoma Fallopian Tube Serous Adenocarcinoma Fallopian Tube Transitional Cell Carcinoma Malignant Ovarian Mixed Epithelial Tumor Ovarian Brenner Tumor Ovarian Clear Cell Adenocarcinoma Ovarian Endometrioid Adenocarcinoma Ovarian Mucinous Adenocarcinoma Ovarian Serous Adenocarcinoma Ovarian Transitional Cell Carcinoma Primary Peritoneal Serous Adenocarcinoma Stage IIIA Fallopian Tube Cancer Stage IIIA Ovarian Cancer Stage IIIA Primary Peritoneal Cancer Stage IIIB Fallopian Tube Cancer Stage IIIB Ovarian Cancer Stage IIIB Primary Peritoneal Cancer Stage IIIC Fallopian Tube Cancer Stage IIIC Ovarian Cancer Stage IIIC Primary Peritoneal                                                                                                                                                                                                                                                                                                                                                                                                                                                                                                                                                                                                                                                                                                                                               | Biological: Bevacizumab Drug: Carboplatin Other: Laboratory Biomarker Analysis Drug: Paclitaxel Other: Placebo Other: Quality-of-Life Assessment         | Progression-free Survival Overall Survival Frequency and Severity (Grade 3 or Above) of Adverse Events Assessed by Common Terminology Criteria for Adverse Events Version 3.0 Impact on Quality of Life Measured by the Functional Assessment of Cancer Therapy-Ovary Trial Outcome Index (FACT-O TOI)                                                                                                                                                                                                                                                                                                                                                               | Phase 3         | 1873 | 5-Sep    | 23-Jul-19 |
| VEGF inhibitor | NCT00667342 | A Study of Bevacizumab in Combination With Chemotherapy for Treatment of Osteosarcoma                                                                                          | Completed | Osteosarcoma Malignant Fibrous Histiocytoma (MFH) of Bone                                                                                                                                                                                                                                                                                                                                                                                                                                                                                                                                                                                                                                                                                                                                                                                                                                                                                                                                                                                                                                                                                                                                                                                                                                                                                                                                                                                                                                                                         | Biological: Bevacizumab Drug: Cisplatin Drug: Doxorubicin Drug: Methotrexate Drug: ifosfamide Drug: etoposide Procedure: Surgery Radiation: Radiotherapy | Number of Participants With Unacceptable Toxicity 3-Year Event Free Survival Histologic Response by Stratum 2-Year Event Free Survival (EFS) of Patients With Osteosarcoma 2-Year Overall Survival (OS) of Patients With Osteosarcoma 2-Year Event Free Survival (EFS) in Patients With Localized Resectable Disease Compared to St. Jude OS99 Protocol 2-Year Overall Survival (OS) in Patients With Localized Resectable Disease Compared to OS99 Protocol. Mean Ktrans Mean Vp Mean Ve Histologic Response by Number of Participants Ktrans by Good and Poor Response P95 of Ktrans by Good and Poor Response Difference Between Good and Poor Response by SUVmax | Phase 2         | 43   | 3-Jun-08 | 28-Jun-19 |

|                |             |                                                                                                                                                               |           |                                                                                                                                                                                                                                                                                                                                                                                                                 |                                                                                                                                                                                     |                                                                                                                                                                                                                                                                                                                                                                                                                                                                                                                                                                                                                                                                                                                                                                                                                           |         |     |           |           |
|----------------|-------------|---------------------------------------------------------------------------------------------------------------------------------------------------------------|-----------|-----------------------------------------------------------------------------------------------------------------------------------------------------------------------------------------------------------------------------------------------------------------------------------------------------------------------------------------------------------------------------------------------------------------|-------------------------------------------------------------------------------------------------------------------------------------------------------------------------------------|---------------------------------------------------------------------------------------------------------------------------------------------------------------------------------------------------------------------------------------------------------------------------------------------------------------------------------------------------------------------------------------------------------------------------------------------------------------------------------------------------------------------------------------------------------------------------------------------------------------------------------------------------------------------------------------------------------------------------------------------------------------------------------------------------------------------------|---------|-----|-----------|-----------|
| VEGF inhibitor | NCT00321685 | Bevacizumab, Radiation Therapy, and Combination Chemotherapy in Treating Patients Who Are Undergoing Surgery for Locally Advanced Nonmetastatic Rectal Cancer | Completed | Rectal Adenocarcinoma Stage II Rectal Cancer AJCC v7 Stage III Rectal Cancer AJCC v7                                                                                                                                                                                                                                                                                                                            | Biological: Bevacizumab Drug: Capecitabine Drug: Fluorouracil Drug: Leucovorin Drug: Oxaliplatin Radiation: Radiation Therapy Procedure: Therapeutic                                | Pathologic Complete Response Rate Resection Rate for T3 Rectal Cancers Resection Rate for T4 Rectal Cancers 5-year Overall Survival Rate 5-year Recurrence-free Survival Rate                                                                                                                                                                                                                                                                                                                                                                                                                                                                                                                                                                                                                                             | Phase 2 | 57  | 25-Jul-06 | 27-Mar-19 |
| VEGF inhibitor | NCT00803062 | Paclitaxel and Cisplatin or Topotecan With or Without Bevacizumab in Treating Patients With Stage IVB, Recurrent, or Persistent Cervical Cancer               | Completed | Cervical Adenocarcinoma Cervical Adenosquamous Carcinoma Cervical Squamous Cell Carcinoma Recurrent Cervical Carcinoma Stage IVB Cervical Cancer                                                                                                                                                                                                                                                                | Biological: Bevacizumab Drug: Cisplatin Other: Laboratory Biomarker Analysis Drug: Paclitaxel Other: Quality-of-Life Assessment Other: Questionnaire Administration Drug: Topotecan | Overall Frequency Progression-free Survival Tumor Response To Determine and Compare the Frequency and Severity of Adverse Events as Assessed by CTCAE Version 3.0 for the Regimens Administered on This Study.                                                                                                                                                                                                                                                                                                                                                                                                                                                                                                                                                                                                            | Phase 3 | 452 | 9-Apr     | 23-Jul-19 |
| VEGF inhibitor | NCT01392209 | Hypofractionated Stereotactic Radiotherapy With Bevacizumab in the Treatment of Recurrent Malignant Glioma                                                    | Completed | Brain Cancer MALIGNANT GLIOMA Glioblastoma Anaplastic Astrocytoma (AA) Anaplastic Oligodendroglioma (AO) Anaplastic Oligo-astrocytoma (AOA) Anaplastic Mixed                                                                                                                                                                                                                                                    | Other: Bevacizumab & Stereotactic Radiotherapy                                                                                                                                      | To establish the maximum tolerated dose (MTD) Response rate Median progression free survival 6 month progression-free survival rate Median overall survival Use of tractography to predict routes of progression in gliomas (MSKCC only) Correlation of VEGF and VEGFR IHC and related pathways (MSKCC only) and MGMT promoter methylation with                                                                                                                                                                                                                                                                                                                                                                                                                                                                           | Phase 1 | 15  | 8-Jul-11  | 22-Nov-19 |
| VEGF inhibitor | NCT00644124 | Aflibercept and Standard Chemotherapy (R-CHOP) in First Line of Non Hodgkin B-cell                                                                            | Completed | Lymphoma, Non-Hodgkin                                                                                                                                                                                                                                                                                                                                                                                           | Drug: aflibercept                                                                                                                                                                   | selected dose of aflibercept based on Dose Limiting Toxicities observed Adverse events Response rate Progression free survival Biomarkers                                                                                                                                                                                                                                                                                                                                                                                                                                                                                                                                                                                                                                                                                 | Phase 1 | 25  | 8-Mar     | 6-May-16  |
| VEGF inhibitor | NCT00430781 | Pazopanib Plus Lapatinib Compared to Lapatinib Alone and Pazopanib Alone in Subjects With Metastatic Cervical Cancer                                          | Completed | Neoplasms, Uterine Cervix Metastatic Cervical Cancer                                                                                                                                                                                                                                                                                                                                                            | Drug: pazopanib (GW786034) Drug: lapatinib (GW572016)                                                                                                                               | Progression-free Survival (PFS) in Interim Analysis Progression-free Survival (PFS) in Final Analysis Overall Survival Clinical Benefit Response Response Time to Response Duration of Response Safety and Tolerability of Pazopanib, Lapatinib and the Combination of Pazopanib and Lapatinib                                                                                                                                                                                                                                                                                                                                                                                                                                                                                                                            | Phase 2 | 228 | 6-Nov     | 8-May-15  |
| VEGF inhibitor | NCT00006155 | SU5416 and Carboplatin to Treat Ovarian Cancer                                                                                                                | Completed | Fallopian Tube Neoplasm Ovarian Cancer Peritoneal Neoplasm                                                                                                                                                                                                                                                                                                                                                      | Drug: SU5416 and carboplatin                                                                                                                                                        |                                                                                                                                                                                                                                                                                                                                                                                                                                                                                                                                                                                                                                                                                                                                                                                                                           | Phase 1 | 33  | Aug-00    | 4-Mar-08  |
| VEGF inhibitor | NCT00026221 | Bevacizumab With or Without Interferon Alfa in Treating Patients With Metastatic Malignant Melanoma                                                           | Completed | Recurrent Melanoma Stage IV Skin Melanoma                                                                                                                                                                                                                                                                                                                                                                       | Biological: Recombinant Interferon Alfa Biological: Bevacizumab                                                                                                                     | Objective Response Rate Progression-free Survival Comparison of Plasma Levels of VEGF Following Administration of Bevacizumab Alone or in Combination With IFN-alfa New Vessel Formation in Patient Tumor Samples                                                                                                                                                                                                                                                                                                                                                                                                                                                                                                                                                                                                         | Phase 2 | 57  | 1-Nov     | 17-Mar-16 |
| VEGF inhibitor | NCT01498328 | A Study of Rindopepimut/GM-CSF in Patients With Relapsed EGFRvIII-Positive Glioblastoma                                                                       | Completed | Glioblastoma Small Cell Glioblastoma Giant Cell Glioblastoma Gliosarcoma Glioblastoma Oligodendroglial Component Recurrent                                                                                                                                                                                                                                                                                      | Drug: Bevacizumab Drug: Rindopepimut (CDX-110) with GM-CSF Drug: KLH                                                                                                                | Groups 1 and 2: Progression-free survival rate Group 2C: Objective Response Rate Safety and Tolerability Anti-tumor activity EGFRvIII-specific immune response                                                                                                                                                                                                                                                                                                                                                                                                                                                                                                                                                                                                                                                            | Phase 2 | 127 | 11-Dec    | 7-Apr-17  |
| VEGF inhibitor | NCT00290810 | Bevacizumab in Treating Patients With Relapsed or Refractory Chronic Lymphocytic Leukemia                                                                     | Completed | B-cell Chronic Lymphocytic Leukemia Refractory Chronic Lymphocytic Leukemia                                                                                                                                                                                                                                                                                                                                     | Biological: bevacizumab                                                                                                                                                             | Number of Patients With Confirmed Objective Status of Complete Response (CR), Complete Clinical Response (CCR), Nodular Partial Response (nPR), or Partial Response (PR) Toxicity Associated With This Regimen in Participants With Relapsed/Refractory Chronic Lymphocytic Leukemia (CLL) Overall Survival Time to Progression                                                                                                                                                                                                                                                                                                                                                                                                                                                                                           | Phase 2 | 12  | 5-Dec     | 9-May-14  |
| VEGF inhibitor | NCT01207687 | Bevacizumab for Symptomatic Vestibular Schwannoma in Neurofibromatosis Type 2 (NF2)                                                                           | Completed | Vestibular Schwannoma Neurofibromatosis Type 2                                                                                                                                                                                                                                                                                                                                                                  | Biological: bevacizumab Other: laboratory biomarker analysis Procedure: quality-of-life assessment                                                                                  | Proportion of Patients With Hearing Response Incidence of Serious or Life Threatening Toxicities Radiographic Response Median Percent Change in Target Vestibular Schwannoma Volume Using Volumetric MRI Number of Participants With Changes in Function of the Auditory System Percent Change in Median Vascular Permeability (Ktrans) Quality of Life Assessed Using Health Survey Short Form-36 (SF-36) - Total Score Quality of Life Assessed Using Health Survey Short Form-36 (SF-36) - Component Scores Quality of Life as Assessed by the Speech and Spatial Qualities Questionnaire (SSQ) Quality of Life Assessed by the Tinnitus Reaction Questionnaire (TRQ)                                                                                                                                                  | Phase 2 | 14  | 10-Oct    | 27-Aug-18 |
| VEGF inhibitor | NCT01164007 | A Study of Bevacizumab (Avastin) in Combination With Dacarbazine in Participants With Unresectable/Metastatic Melanoma                                        | Completed | Malignant Melanoma                                                                                                                                                                                                                                                                                                                                                                                              | Drug: Bevacizumab Drug: Dacarbazine                                                                                                                                                 | Percentage of Participants With Complete Response (CR) or Partial Response (PR) According to Response Evaluation Criteria in Solid Tumors (RECIST) Percentage of Participants With Death or Disease Progression Following a Previous Assessment of CR or PR According to RECIST Duration of Response (DOR) With CR or PR According to RECIST Percentage of Participants With Death or Disease Progression Following a Previous Assessment of CR, PR, or Stable Disease (SD) According to RECIST DOR With CR, PR, or SD According to RECIST Percentage of Participants With Death or Disease Progression According to RECIST Time to Progression (TTP) According to RECIST Percentage of Participants Who Discontinued Treatment Time to Treatment Failure (TTF) Percentage of Participants Who Died Overall Survival (OS) | Phase 2 | 40  | 30-Jun-06 | 21-Apr-17 |
| VEGF inhibitor | NCT01208103 | Bevacizumab, Capecitabine, and Oxaliplatin in Treating Advanced Small Intestinal or Ampulla of Vater Adenocarcinoma                                           | Completed | Ampulla of Vater Adenocarcinoma Small Intestinal Adenocarcinoma Stage III Ampulla of Vater Cancer AJCC v8 Stage III Small Intestinal Adenocarcinoma AJCC v8 Stage IIIA Ampulla of Vater Cancer AJCC v8 Stage IIIA Small Intestinal Adenocarcinoma AJCC v8 Stage IIIB Ampulla of Vater Cancer AJCC v8 Stage IIIB Small Intestinal Adenocarcinoma AJCC v8 Stage IV Ampulla of Vater Cancer AJCC v8 Stage IV Small | Biological: Bevacizumab Drug: Capecitabine Drug: Oxaliplatin                                                                                                                        | Number of Participants With Progression-free Survival (PFS) at Six Months To Determine the Response Rate (RR) for CAPOX and Bevacizumab To Determine the Overall PFS for CAPOX and Bevacizumab To Determine the Overall Survival (OS) for CAPOX and Bevacizumab Number of Participants With Adverse Events                                                                                                                                                                                                                                                                                                                                                                                                                                                                                                                | Phase 2 | 30  | 6-May-11  | 18-Jan-20 |

|                |             |                                                                                                                                                              |           |                                                                                                                                                                                                                                                                               |                                                                                                                                   |                                                                                                                                                                                                                                                                                                                                                                                                                           |         |     |           |           |
|----------------|-------------|--------------------------------------------------------------------------------------------------------------------------------------------------------------|-----------|-------------------------------------------------------------------------------------------------------------------------------------------------------------------------------------------------------------------------------------------------------------------------------|-----------------------------------------------------------------------------------------------------------------------------------|---------------------------------------------------------------------------------------------------------------------------------------------------------------------------------------------------------------------------------------------------------------------------------------------------------------------------------------------------------------------------------------------------------------------------|---------|-----|-----------|-----------|
| VEGF inhibitor | NCT00521001 | Temozolomide and Everolimus in Treating Patients With Stage IV Melanoma That Cannot be Removed                                                               | Completed | Melanoma (Skin)                                                                                                                                                                                                                                                               | Drug: everolimus Drug: temozolomide                                                                                               | 9-week Progression-free Survival Rate Survival Time Time to Disease Progression Confirmed Response Rate (Complete Response and Partial Response)                                                                                                                                                                                                                                                                          | Phase 2 | 49  | 8-Jan     | 14-Aug-17 |
| VEGF inhibitor | NCT01136967 | An Open-Label, 2-Cohort, Multicenter, Study of Lenvatinib in Previously Treated Subjects With Unresectable Stage III or Stage IV Melanoma                    | Completed | Unresectable Stage III Stage IV Melanoma                                                                                                                                                                                                                                      | Drug: Lenvatinib                                                                                                                  | Objective Response Rate (ORR) Progression Free Survival (PFS) Overall Survival (OS) Disease Control Rate (DCR) Clinical Benefit Rate (CBR) Number of Participants With Adverse Events (AEs)/ Serious Adverse Events (SAEs) as a Measure of Safety and Tolerability of Lenvatinib Change From Baseline in the Concentration of Clinical Biomarkers in Whole Blood Summary of Plasma Concentration of Lenvatinib            | Phase 2 | 182 | 10-Aug    | 13-Nov-19 |
| VEGF inhibitor | NCT00762255 | A Phase I Trial of Vorinostat in Combination With Bevacizumab & Irinotecan in Recurrent Glioblastoma                                                         | Completed | Glioblastoma                                                                                                                                                                                                                                                                  | Drug: Vorinostat Drug: Bevacizumab Drug: Irinotecan                                                                               | Maximum Tolerated Dose (MTD) Number of Participants With Progression Free Survival (PFS) at 6 Months Number of Participants With Adverse Events (AEs)                                                                                                                                                                                                                                                                     | Phase 1 | 19  | 8-Sep     | 25-Jul-13 |
| VEGF inhibitor | NCT00255762 | Carboplatin, Paclitaxel, and Bevacizumab in Treating Patients With Stage IV Melanoma That Cannot Be Removed By Surgery                                       | Completed | Recurrent Melanoma Stage IV Melanoma                                                                                                                                                                                                                                          | Drug: carboplatin Drug: paclitaxel Biological: bevacizumab Other: laboratory biomarker analysis                                   | Progression free survival Confirmed tumor response (complete response or partial response) Clinical response rate Overall survival                                                                                                                                                                                                                                                                                        | Phase 2 | 47  | 5-Dec     | 28-Oct-13 |
| VEGF inhibitor | NCT01112527 | PF-00299804 in Adult Patients With Relapsed/Recurrent Glioblastoma                                                                                           | Completed | Glioblastoma GBM Glioblastoma Multiforme                                                                                                                                                                                                                                      | Drug: PF-00299804                                                                                                                 | Progression-Free Survival Ability of PF-00299804 to cross the blood-brain barrier Safety and tolerability Anti-tumor response                                                                                                                                                                                                                                                                                             | Phase 2 | 58  | 10-Apr    | 16-Aug-18 |
| VEGF inhibitor | NCT00276055 | Phase IB Study of Gemcitabine, Docetaxel and Bevacizumab in Patients With Soft Tissue Sarcoma                                                                | Completed | Sarcoma                                                                                                                                                                                                                                                                       | Drug: Gemcitabine, Docetaxel and Bevacizumab                                                                                      | Overall response rate (complete and partial responses).                                                                                                                                                                                                                                                                                                                                                                   | Phase 1 | 38  | 5-Nov     | 19-Jun-15 |
| VEGF inhibitor | NCT00448019 | FCR and Bevacizumab in the Treatment of Relapsed Chronic Lymphocytic Leukemia (CLL)                                                                          | Completed | Chronic Lymphocytic Leukemia                                                                                                                                                                                                                                                  | Drug: Fludarabine Drug: Cyclophosphamide Drug: Rituximab Drug: Bevacizumab                                                        | Progression Free Survival (PFS) Rate Number of Participants With Complete or Partial Response to Fludarabine, Cyclophosphamide, Rituximab, and Bevacizumab Therapy in Previously Treated Chronic Lymphocytic Leukemia (CLL) Overall Response Rate (ORR) to Fludarabine, Cyclophosphamide, Rituximab, and Bevacizumab Therapy in Previously                                                                                | Phase 2 | 64  | 7-Feb     | 2-Nov-15  |
| VEGF inhibitor | NCT03376958 | Apatinib for Relapsed and Refractory Diffuse Large B Cell Lymphoma                                                                                           | Completed | Relapsed and Refractory Diffuse Large B Cell Lymphoma                                                                                                                                                                                                                         | Drug: Apatinib                                                                                                                    | Overall Response Rate Progression-free Survival Overall Survival                                                                                                                                                                                                                                                                                                                                                          | Phase 4 | 32  | 1-Jan-17  | 25-Jul-19 |
| VEGF inhibitor | NCT00923936 | Pilot Study of Liposomal Doxorubicin Combined With Bevacizumab Followed by Bevacizumab Monotherapy in Adults With Advanced Kaposi s Sarcoma                  | Completed | Sarcoma, Kaposi                                                                                                                                                                                                                                                               | Drug: Liposomal Doxorubicin Drug: Bevacizumab                                                                                     | Overall Response Rate (ORR) of Six Cycles of Liposomal Doxorubicin Combined With Bevacizumab in Patients With Advanced KS. Complete Response Rate After 6 Cycles of Liposomal Doxorubicin Combined With Bevacizumab Count of Participants With Serious and Non-serious Adverse Events Median Number of Cycles Need to Obtain a Partial Response Percentage of Participants With 12- Month Progression-free Survival (PFS) | Phase 2 | 16  | 23-Apr-09 | 24-Jul-18 |
| VEGF inhibitor | NCT01222715 | Vinorelbine Tartrate and Cyclophosphamide in Combination With Bevacizumab or Temozolomide in Treating Patients With Recurrent or Refractory Rhabdomyosarcoma | Completed | Adult Rhabdomyosarcoma Childhood Alveolar Rhabdomyosarcoma Childhood Pleomorphic Rhabdomyosarcoma Childhood Rhabdomyosarcoma With Mixed Embryonal and Alveolar Features Previously Treated Childhood Rhabdomyosarcoma Recurrent Adult Soft Tissue Sarcoma Recurrent Childhood | Biological: Bevacizumab Drug: Cyclophosphamide Other: Laboratory Biomarker Analysis Drug: Temozolomide Drug: Vinorelbine Tartrate | Event Free Survival Probability Rate of Dose-Limiting Toxicities Response Rate (CR + PR)                                                                                                                                                                                                                                                                                                                                  | Phase 2 | 87  | 10-Oct    | 5-May-17  |

|                 |             |                                                                                                                                                                     |           |                                                                                                                                                                                                                                                                                                                                                                                                                                                                                                                                                                                                                                                                                                                                                                                                                                                                                                                                                                                                                                                                                                                                                                                                                                                                                                                                                                                                                                                                                                                                                                                                              |                                                                                                                                                                                                          |                                                                                                                                                                                                                                                                                  |         |     |                   |                   |
|-----------------|-------------|---------------------------------------------------------------------------------------------------------------------------------------------------------------------|-----------|--------------------------------------------------------------------------------------------------------------------------------------------------------------------------------------------------------------------------------------------------------------------------------------------------------------------------------------------------------------------------------------------------------------------------------------------------------------------------------------------------------------------------------------------------------------------------------------------------------------------------------------------------------------------------------------------------------------------------------------------------------------------------------------------------------------------------------------------------------------------------------------------------------------------------------------------------------------------------------------------------------------------------------------------------------------------------------------------------------------------------------------------------------------------------------------------------------------------------------------------------------------------------------------------------------------------------------------------------------------------------------------------------------------------------------------------------------------------------------------------------------------------------------------------------------------------------------------------------------------|----------------------------------------------------------------------------------------------------------------------------------------------------------------------------------------------------------|----------------------------------------------------------------------------------------------------------------------------------------------------------------------------------------------------------------------------------------------------------------------------------|---------|-----|-------------------|-------------------|
| VEGF inhibitor  | NCT00492089 | Bevacizumab in Reducing CNS Side Effects in Patients Who Have Undergone Radiation Therapy to the Brain for Primary Brain Tumor, Meningioma, or Head and Neck Cancer | Completed | Adult Anaplastic Astrocytoma Adult Anaplastic Ependymoma Adult Anaplastic Meningioma Adult Anaplastic Oligodendroglioma Adult Brain Stem Glioma Adult Central Nervous System Germ Cell Tumor Adult Choroid Plexus Tumor Adult Diffuse Astrocytoma Adult Ependymoma Adult Grade II Meningioma Adult Grade III Meningioma Adult Malignant Hemangiopericytoma Adult Mixed Glioma Adult Oligodendroglioma Adult Papillary Meningioma Adult Pineocytoma Malignant Neoplasm Meningeal Melanocytoma Radiation Toxicity Recurrent Adenoid Cystic Carcinoma of the Oral Cavity Recurrent Adult Brain Tumor Recurrent Basal Cell Carcinoma of the Lip Recurrent Esthesioneuroblastoma of the Paranasal Sinus and Nasal Cavity Recurrent Inverted Papilloma of the Paranasal Sinus and Nasal Cavity Recurrent Lymphoepithelioma of the Nasopharynx Recurrent Lymphoepithelioma of the Oropharynx Recurrent Midline Lethal Granuloma of the Paranasal Sinus and Nasal Cavity Recurrent Mucoepidermoid Carcinoma of the Oral Cavity Recurrent Salivary Gland Cancer Recurrent Squamous Cell Carcinoma of the Hypopharynx Recurrent Squamous Cell Carcinoma of the Larynx Recurrent Squamous Cell Carcinoma of the Lip and Oral Cavity Recurrent Squamous Cell Carcinoma of the Nasopharynx Recurrent Squamous Cell Carcinoma of the Oropharynx Recurrent Squamous Cell Carcinoma of the Paranasal Sinus and Nasal Cavity Recurrent Verrucous Carcinoma of the Larynx Recurrent Verrucous Carcinoma of the Oral Cavity Stage I Adenoid Cystic Carcinoma of the Oral Cavity Stage I Basal Cell Carcinoma of the Lip Stage I | Drug: placebo Drug: bevacizumab Drug: magnetic resonance imaging Procedure: quality-of-life assessment                                                                                                   | Number of Participants With Response ( > 25% Reduction in T2 Flair) From Baseline to Evaluation at 6 Weeks Post Treatment                                                                                                                                                        | Phase 2 | 11  | 7-Jun             | 9-May-14          |
| VEGF inhibitor  | NCT00121199 | Combination Chemo, Rituximab, and Bevacizumab in Older Patients With Stage II-IV Diffuse Large B-Cell Lymphoma                                                      | Completed | Contiguous Stage II Adult Diffuse Large Cell Lymphoma Noncontiguous Stage II Adult Diffuse Large Cell Lymphoma Stage III Adult Diffuse Large Cell Lymphoma Stage IV Adult Diffuse Large Cell Lymphoma                                                                                                                                                                                                                                                                                                                                                                                                                                                                                                                                                                                                                                                                                                                                                                                                                                                                                                                                                                                                                                                                                                                                                                                                                                                                                                                                                                                                        | Biological: rituximab Biological: bevacizumab Drug: cyclophosphamide Drug: doxorubicin hydrochloride Drug: vincristine sulfate Drug: prednisone Other: laboratory biomarker                              | Progression-free Survival at 1 Year Progression-free Survival at 2 Year Objective Response (Confirmed and Unconfirmed Complete Response (CR) or Partial Response (PR)) Number of Patients With Grade 3 Through Grade 5 Adverse Events That Are Related to Study Drug             | Phase 2 | 73  | 5-Jun             | 21-May-14         |
| VEGF inhibitor  | NCT00884741 | Temozolomide and Radiation Therapy With or Without Bevacizumab in Treating Patients With Newly Diagnosed Glioblastoma                                               | Completed | Glioblastoma Gliosarcoma Supratentorial Glioblastoma                                                                                                                                                                                                                                                                                                                                                                                                                                                                                                                                                                                                                                                                                                                                                                                                                                                                                                                                                                                                                                                                                                                                                                                                                                                                                                                                                                                                                                                                                                                                                         | Radiation: 3-Dimensional Conformal Radiation Therapy Biological: Bevacizumab Radiation: Intensity-Modulated Radiation Therapy Other: Laboratory Biomarker Analysis Other: Placebo Other: Quality-of-Life | Overall Survival (OS) Progression-free Survival (PFS) Incidence of Grade 3 and Higher Treatment-related Toxicity as Assessed by the National Cancer Institute Common Terminology Criteria for Adverse Events (AEs) Version 3.0                                                   | Phase 3 | 637 | 15-Apr-09         | 24-Jul-19         |
| VEGF inhibitor  | NCT02628951 | Ramucirumab/Paclitaxel as Second-line Treatment in Metastatic Gastric or Gastroesophageal Junction Adenocarcinoma With Integrative Genomic Analysis                 | Completed | Gastric Adenocarcinoma Gastroesophageal Junction Adenocarcinoma                                                                                                                                                                                                                                                                                                                                                                                                                                                                                                                                                                                                                                                                                                                                                                                                                                                                                                                                                                                                                                                                                                                                                                                                                                                                                                                                                                                                                                                                                                                                              | Drug: Ramucirumab Drug: Paclitaxel                                                                                                                                                                       | objective response rate response rate according to molecular subtypes                                                                                                                                                                                                            | Phase 2 | 62  | 26-May-16         | 19-Nov-20         |
| IGFR inhibitors | NCT02045368 | Study of Insulin-like Growth Factor (IGF)-Methotrexate Conjugate in the Treatment of Advanced Tumors                                                                | Completed | Breast Cancer Brain Cancer Gastrointestinal Cancers Genitourinary Cancers Gynecologic Cancers Head and Neck Cancers Melanoma Thoracic                                                                                                                                                                                                                                                                                                                                                                                                                                                                                                                                                                                                                                                                                                                                                                                                                                                                                                                                                                                                                                                                                                                                                                                                                                                                                                                                                                                                                                                                        | Drug: IGF-1R/AS ODN; Surgery with tissue harvest and implantation 20 diffusion chambers in the rectus sheath with IGF-1R/AS ODN within 24 hours of craniotomy.                                           | Maximum Tolerated Dose (MTD) Adverse Effects Disease Response based on RECIST Criteria                                                                                                                                                                                           | Phase 1 | 92  | January 28, 2014  | August 22, 2019   |
| IGFR inhibitors | NCT02507583 | Antisense102: Pilot Immunotherapy for Newly Diagnosed Malignant Glioma                                                                                              | Completed | Malignant Glioma Neoplasms                                                                                                                                                                                                                                                                                                                                                                                                                                                                                                                                                                                                                                                                                                                                                                                                                                                                                                                                                                                                                                                                                                                                                                                                                                                                                                                                                                                                                                                                                                                                                                                   | Drug: IGF-1R/AS ODN Surgery with tissue harvest and implantation 20 diffusion chambers in the rectus sheath with IGF-1R/AS ODN within 24 hours of craniotomy.                                            | Collect adverse events as a measure of safety and tolerability of IG-1R/ AS ODN Document any T-1 weighted MRI-based radiographic responses to treatment. Document any T-2 weighted MRI-based radiographic abnormalities or responses to treatment. MRI measure of tumor response | Phase 1 | 33  | September 1, 2015 | October 6, 2020   |
| IGFR inhibitors | NCT01550523 | Pilot Immunotherapy Trial for Recurrent Malignant Gliomas                                                                                                           | Completed | Malignant Glioma of Brain                                                                                                                                                                                                                                                                                                                                                                                                                                                                                                                                                                                                                                                                                                                                                                                                                                                                                                                                                                                                                                                                                                                                                                                                                                                                                                                                                                                                                                                                                                                                                                                    | Drug: IGF-1R/AS ODN Device: xiodiffusion chamber                                                                                                                                                         | To establish the safety profile of a combination product with an optimized Good Manufacturing Practices AS ODN in the treatment of patients with recurrent malignant glioma with concomitant assessment of any therapeutic impact  MRI based radiographic                        | Phase 1 | 13  | February 9, 2012  | June 20, 2018     |
| IGFR inhibitors | NCT00763607 | Retrospective Study Evaluating IGF1R And p95HER2 as Prognostic Factors in Non Small Cell Lung                                                                       | Completed | Non Small Cell Lung Cancer                                                                                                                                                                                                                                                                                                                                                                                                                                                                                                                                                                                                                                                                                                                                                                                                                                                                                                                                                                                                                                                                                                                                                                                                                                                                                                                                                                                                                                                                                                                                                                                   | Genetic: Protein expression by immunohistochemistry and immunofluorescence                                                                                                                               | Association of different biomarkers with survival Association of a specific biomarker with patient's characteristics                                                                                                                                                             |         | 454 | November 2007     | September 2, 2010 |
| IGFR inhibitors | NCT00887159 | A Randomized Phase II Study of Cisplatin and Etoposide in Combination With Either Hedgehog Inhibitor GDC-0449 or IGF-1R MOAB IMC-A12 for Patients With Extensive    | Completed | Extensive Stage Small Cell Lung Carcinoma Recurrent Small Cell Lung Carcinoma                                                                                                                                                                                                                                                                                                                                                                                                                                                                                                                                                                                                                                                                                                                                                                                                                                                                                                                                                                                                                                                                                                                                                                                                                                                                                                                                                                                                                                                                                                                                | Drug: Cisplatin Biological: Cixutumumab Drug: Etoposide Other: Laboratory Biomarker Analysis Drug: Vismodegib                                                                                            | Progression-free Survival (PFS) Response Rate Overall Survival (OS) PFS                                                                                                                                                                                                          | Phase 2 | 168 | July 16, 2009     | January 5, 2021   |

|                 |             |                                                                                                                                              |           |                                                                                                                                                                                                                                                                                                                                                                                                                                                                                           |                                                                                                 |                                                                                                                                                                                                                                                                                                                                                                                                                                                                                                                                                                                                                                                                                                                                                                                                                                                                                                                                                                                          |         |     |                  |                   |
|-----------------|-------------|----------------------------------------------------------------------------------------------------------------------------------------------|-----------|-------------------------------------------------------------------------------------------------------------------------------------------------------------------------------------------------------------------------------------------------------------------------------------------------------------------------------------------------------------------------------------------------------------------------------------------------------------------------------------------|-------------------------------------------------------------------------------------------------|------------------------------------------------------------------------------------------------------------------------------------------------------------------------------------------------------------------------------------------------------------------------------------------------------------------------------------------------------------------------------------------------------------------------------------------------------------------------------------------------------------------------------------------------------------------------------------------------------------------------------------------------------------------------------------------------------------------------------------------------------------------------------------------------------------------------------------------------------------------------------------------------------------------------------------------------------------------------------------------|---------|-----|------------------|-------------------|
| IGFR inhibitors | NCT01233895 | Study of AVE1642 Anti-IGF1R Monoclonal Antibody in Patients With Advanced Multiple Myeloma                                                   | Completed | Multiple Myeloma                                                                                                                                                                                                                                                                                                                                                                                                                                                                          | Drug: AVE1642 Drug: Velcade                                                                     | definition of the Selected Dose (SD) Assess the efficacy (complete, partial, minimal responses and stabilizations) Pharmacokinetic drug interaction between AVE1642 and Velcade (part 2)                                                                                                                                                                                                                                                                                                                                                                                                                                                                                                                                                                                                                                                                                                                                                                                                 | Phase 1 | 26  | September 2006   | November 3, 2010  |
| IGFR inhibitors | NCT01561456 | Study of AXL1717 Compared to Docetaxel to Treat Squamous Cell Carcinoma or Adenocarcinoma of the Lung                                        | Completed | Non-small-cell Lung Cancer Squamous Cell Carcinoma Adenocarcinoma of the Lung                                                                                                                                                                                                                                                                                                                                                                                                             | Drug: AXL1717 Drug: Docetaxel                                                                   | Rate of progression-free survival (PFS) Rate of complete response (CR), partial response (PR), stable disease (SD), progressive disease (PD), disease control (CR + PR + SD), and objective response (CR + PR) Median time to disease progression (TTP), time to objective response and time to treatment failure (TTF) Median duration of progression-free survival (PFS), objective response and disease control 12-week survival 1 year                                                                                                                                                                                                                                                                                                                                                                                                                                                                                                                                               | Phase 2 | 100 | December 2011    | December 5, 2013  |
| IGFR inhibitors | NCT01372644 | Breast Cancer Chemoprevention by SOM230, an IGF-1 Action Inhibitor: A Proof of Principle Trial                                               | Completed | Atypical Ductal Breast Hyperplasia Lobular Carcinoma in Situ (LCIS) Atypical Lobular Hyperplasia (ALH) of Breast                                                                                                                                                                                                                                                                                                                                                                          | Drug: SOM 230 / Pasireotide                                                                     | Cell Proliferation and apoptosis                                                                                                                                                                                                                                                                                                                                                                                                                                                                                                                                                                                                                                                                                                                                                                                                                                                                                                                                                         | Phase 1 | 15  | November 2007    | December 5, 2016  |
| IGFR inhibitors | NCT00831844 | Cixutumumab in Treating Patients With Relapsed or Refractory Solid Tumors                                                                    | Completed | Adult Rhabdomyosarcoma Adult Synovial Sarcoma Childhood Hepatoblastoma Childhood Synovial Sarcoma Previously Treated Childhood Rhabdomyosarcoma Recurrent Adrenocortical Carcinoma Recurrent Adult Soft Tissue Sarcoma Recurrent Childhood Liver Cancer Recurrent Childhood Rhabdomyosarcoma Recurrent Childhood Soft Tissue Sarcoma Recurrent Ewing Sarcoma Peripheral Primitive Neuroectodermal Tumor Recurrent Neuroblastoma Recurrent Osteosarcoma Recurrent Retinoblastoma Recurrent | Biological: cixutumumab Other: laboratory biomarker analysis                                    | Disease Response                                                                                                                                                                                                                                                                                                                                                                                                                                                                                                                                                                                                                                                                                                                                                                                                                                                                                                                                                                         | Phase 2 | 116 | January 2009     | March 30, 2015    |
| IGFR inhibitors | NCT01466647 | A Study of the IGF-1R Inhibitor AXL1717 in Combination With Gemcitabine HCL and Carboplatin to Treat Non-small-cell Lung Cancer              | Completed | Non Small Cell Lung Cancer                                                                                                                                                                                                                                                                                                                                                                                                                                                                | Drug: AXL1717                                                                                   | Safety of AXL1717 in combination with Gemcitabine HCL and Carboplatin                                                                                                                                                                                                                                                                                                                                                                                                                                                                                                                                                                                                                                                                                                                                                                                                                                                                                                                    | Phase 1 | 12  | January 2011     | November 12, 2012 |
| IGFR inhibitors | NCT02824133 | Treatment With AZD4547 for Recurrent Malignant Glioma Expressing FGFR-TACC Gene Fusion"                                                      | Completed | Recurrent IDHwt Gliomas With FGFR3-TACC3 Fusion Recurrent IDHwt Gliomas With FGFR1-TACC1 Fusion                                                                                                                                                                                                                                                                                                                                                                                           | Drug: AZD4547                                                                                   | Progression free survival measured according to RANO (Response Assessment in Neuro-Oncology) criteria Overall response rate measured according to RANO criteria Duration of PFS Overall survival Safety of AZD4547 (Number of patients who experienced grade III-IV (CTCAE v4.0) toxicity related to the drug) Pharmacokinetic of AZD4547: Maximum Plasma Concentration [Cmax] Pharmacokinetic of AZD4547: Area Under the Curve [AUC] Pharmacokinetic of AZD4547: Residual Plasma Concentration                                                                                                                                                                                                                                                                                                                                                                                                                                                                                          | Phase 1 | 14  | September 2015   | May 29, 2019      |
| IGFR inhibitors | NCT01016015 | Temsirolimus and Cixutumumab in Treating Patients With Locally Advanced, Metastatic, or Recurrent Soft Tissue Sarcoma or Bone                | Completed | Metastatic Osteosarcoma Recurrent Adult Soft Tissue Sarcoma Recurrent Osteosarcoma Stage III Adult Soft Tissue Sarcoma Stage IV Adult Soft Tissue Sarcoma                                                                                                                                                                                                                                                                                                                                 | Biological: Cixutumumab Other: Laboratory Biomarker Analysis Drug: Temsirolimus                 | Progression-free Survival Rate, Defined as CR + PR + SD, as Assessed by RECIST Criteria                                                                                                                                                                                                                                                                                                                                                                                                                                                                                                                                                                                                                                                                                                                                                                                                                                                                                                  | Phase 2 | 178 | November 2009    | July 30, 2015     |
| IGFR inhibitors | NCT01026623 | Cixutumumab and Temsirolimus in Treating Patients With Metastatic Prostate Cancer                                                            | Completed | Hormone-Resistant Prostate Cancer Prostate Adenocarcinoma Recurrent Prostate Carcinoma Stage IV Prostate Cancer                                                                                                                                                                                                                                                                                                                                                                           | Biological: Cixutumumab Other: Diagnostic Laboratory Biomarker Analysis Drug: Temsirolimus      | cTTP Tumor Response Rate Change in PSA Doubling Time Duration of Effect Maximal Percentage Change in Serum PSA as Compared to Week 12 Versus Baseline Progression-free Survival Rate of Adverse Events According to NCI CTCAE                                                                                                                                                                                                                                                                                                                                                                                                                                                                                                                                                                                                                                                                                                                                                            | Phase 1 | 16  | October 2009     | June 17, 2019     |
| IGFR inhibitors | NCT01008566 | Cixutumumab and Sorafenib Tosylate in Treating Patients With Advanced Liver Cancer                                                           | Completed | Adult Hepatocellular Carcinoma Advanced Adult Hepatocellular Carcinoma Localized Non-Resectable Adult Liver Carcinoma Recurrent Adult Liver Carcinoma                                                                                                                                                                                                                                                                                                                                     | Biological: Cixutumumab Other: Laboratory Biomarker Analysis Drug: Sorafenib Tosylate           | MTD defined as the highest IMC-A12 dose tested in which none or only one patient had a dose-limiting toxicity (DLT) attributed to IMC-A12 as assessed by NCI CTCAE version 4.0 Toxicities and tolerability of this regimen as assessed by NCI CTCAE version 4.0 Impact of cixutumumab on biomarkers related to the IGF-1R/IGF pathway Objective response rate according to RECIST Progression-free rate according to the Response                                                                                                                                                                                                                                                                                                                                                                                                                                                                                                                                                        | Phase 1 | 21  | August 2009      | May 12, 2016      |
| IGFR inhibitors | NCT00609141 | IMC-A12 in Treating Young Patients With Relapsed or Refractory Ewing Sarcoma/Peripheral Primitive Neuroectodermal Tumor or Other Solid Tumor | Completed | Recurrent Ewing Sarcoma Peripheral Primitive Neuroectodermal Tumor Unspecified Childhood Solid Tumor, Protocol Specific                                                                                                                                                                                                                                                                                                                                                                   | Biological: cixutumumab Other: pharmacological study Other: laboratory biomarker analysis       | Adverse events as assessed by the National Cancer Institute Common Terminology Criteria for Adverse Events version 3.0 MTD or recommended phase II dose Pharmacokinetics of IMC-A12 Response rate (complete or partial response) in patients with Ewing sarcoma/peripheral PNET                                                                                                                                                                                                                                                                                                                                                                                                                                                                                                                                                                                                                                                                                                          | Phase 1 | 34  | January 2008     | June 19, 2014     |
| IGFR inhibitors | NCT00778167 | Erlotinib Hydrochloride With or Without Cixutumumab in Treating Patients With Stage III or Stage IV Non-Small Cell Lung Cancer               | Completed | Recurrent Non-small Cell Lung Cancer Stage IIIA Non-small Cell Lung Cancer Stage IIIB Non-small Cell Lung Cancer Stage IV Non-small Cell Lung Cancer                                                                                                                                                                                                                                                                                                                                      | Biological: cixutumumab Drug: erlotinib hydrochloride Other: laboratory biomarker analysis      | Safety and Tolerability of IMC-A12 in Combination With Erlotinib Hydrochloride as Graded by Common Terminology Criteria for Adverse Event (CTCAE) Version 3.0 (DLTs During Cycle One)                                                                                                                                                                                                                                                                                                                                                                                                                                                                                                                                                                                                                                                                                                                                                                                                    | Phase 1 | 18  | October 2008     | May 21, 2014      |
| IGFR inhibitors | NCT00869752 | MK-0646, Etoposide, and Cisplatin in Treating Patients With Extensive-Stage Small Cell Lung Cancer                                           | Completed | Lung Cancer                                                                                                                                                                                                                                                                                                                                                                                                                                                                               | Biological: anti-IGF-1R recombinant monoclonal antibody MK-0646 Drug: cisplatin Drug: etoposide | Recommended phase II dose of MK-0646 in combination with standard etoposide and cisplatin chemotherapy Toxicity and tolerability according to NCI CTCAE v3.0 Preliminary efficacy Objective response rate Predictive and prognostic impact of biomarkers                                                                                                                                                                                                                                                                                                                                                                                                                                                                                                                                                                                                                                                                                                                                 | Phase 1 | 12  | January 30, 2009 | April 8, 2020     |
| IGFR inhibitors | NCT01498952 | MEDI-573 in Combination With SOC in Unresectable or Metastatic HCC.                                                                          | Completed | Unresectable or Metastatic Hepatocellular Carcinoma (HCC)                                                                                                                                                                                                                                                                                                                                                                                                                                 | Drug: MEDI-573 (1 of 3 doses) Drug: Sorafenib                                                   | Phase 1b: Number of Participants With Dose-limiting Toxicities (DLTs) Phase 1b: Number of Participants With Treatment Emergent Adverse Events (TEAEs) and Treatment Emergent Serious Adverse Events (SAEs) Phase 1b: Number of Participants With Clinical Laboratory Abnormalities Reported as TEAEs Phase 1b: Number of Participants With Vital Signs Abnormalities Reported as TEAEs Phase 1b: Number of Participants With Electrocardiogram (ECG) Abnormalities Reported as TEAEs Phase 2: Time to Progression Phase 1b and Phase 2: Number of Participants With Positive Anti-drug Antibodies (ADA) to MEDI-573 Phase 2: Best Overall Tumor Response Phase 2: Objective Response Rate Phase 2: Progression-free Survival (PFS) Phase 2: Change in Tumor Size Phase 1b and Phase 2: Time to Reach Maximum Observed Serum Concentration (Tmax) of MEDI-573 for Cycle 1 Phase 1b and Phase 2: Maximum Observed Serum Concentration (Cmax) of MEDI-573 for Cycle 1 Phase 1b and Phase 2: | Phase 1 | 6   | January 17, 2012 | February 19, 2019 |

|                 |             |                                                                                                                                                          |           |                                                                                                                                                                                                                                                                                                                                                                                                                                                                                       |                                                                                                                                     |                                                                                                                                                                                                                                                                                                                                                                                                                                                                                                                                                                                                                                                                                             |                 |     |               |                    |
|-----------------|-------------|----------------------------------------------------------------------------------------------------------------------------------------------------------|-----------|---------------------------------------------------------------------------------------------------------------------------------------------------------------------------------------------------------------------------------------------------------------------------------------------------------------------------------------------------------------------------------------------------------------------------------------------------------------------------------------|-------------------------------------------------------------------------------------------------------------------------------------|---------------------------------------------------------------------------------------------------------------------------------------------------------------------------------------------------------------------------------------------------------------------------------------------------------------------------------------------------------------------------------------------------------------------------------------------------------------------------------------------------------------------------------------------------------------------------------------------------------------------------------------------------------------------------------------------|-----------------|-----|---------------|--------------------|
| IGFR inhibitors | NCT01533181 | Linsitinib or Topotecan Hydrochloride in Treating Patients With Relapsed Small Cell Lung Cancer                                                          | Completed | Recurrent Small Cell Lung Carcinoma                                                                                                                                                                                                                                                                                                                                                                                                                                                   | Other: Laboratory Biomarker Analysis Drug: Linsitinib Other: Pharmacological Study Drug: Topotecan Hydrochloride                    | Median Progression Free Survival (PFS) Disease Control Rate (DCR) Incidence of Serious Adverse Events (SAEs) Possibly/Probably/Definitely Related to Study Drugs Overall Survival (OS)                                                                                                                                                                                                                                                                                                                                                                                                                                                                                                      | Phase 2         | 44  | February 2012 | January 14, 2016   |
| IGFR inhibitors | NCT01204476 | Cixutumumab, Everolimus, and Octreotide Acetate in Treating Patients With Advanced Low to Intermediate Grade Neuroendocrine Carcinoma                    | Completed | Gastrin-Producing Neuroendocrine Tumor Lung Carcinoid Tumor Metastatic Digestive System Neuroendocrine Tumor G1 Pancreatic Glucagonoma Pancreatic Insulinoma Pancreatic Polypeptide Tumor Paraganglioma Recurrent Digestive System Neuroendocrine Tumor G1 Recurrent Merkel Cell Carcinoma Recurrent Pancreatic Neuroendocrine Carcinoma Regional Digestive System Neuroendocrine Tumor G1 Somatostatin-Producing Neuroendocrine Tumor Stage III Merkel Cell Carcinoma Stage IV Merke | Biological: Cixutumumab Drug: Everolimus Other: Laboratory Biomarker Analysis Drug: Octreotide Acetate Other: Pharmacological Study | Incidence of dose-limiting toxicities (DLTs) for the combination of cixutumumab and everolimus with octreotide acetate Pharmacodynamic markers in blood and tumor tissue Pharmacokinetic parameters Safety profile of cixutumumab and everolimus with octreotide acetate among patients with advanced neuroendocrine tumors, defined by the incidence of adverse events Anti-tumor activity as determined by RECIST                                                                                                                                                                                                                                                                         | Phase 1         | 27  | October 2010  | July 15, 2016      |
| IGFR inhibitors | NCT00563680 | QUILT-3.025: A Phase 2 Study of AMG 479 in Relapsed or Refractory Ewing's Family Tumor and Desmoplastic Small Round Cell                                 | Completed | Askin's Tumors Desmoplastic Small Round Cell Tumors Estraoeseous Ewing's Tumor Ewing's Family Tumor Ewing's Sarcoma Primitive Neuroectodermal Tumors (PNETs) Sarcoma                                                                                                                                                                                                                                                                                                                  | Drug: AMG 479                                                                                                                       | Objective response rate (Partial Response [PR] or Complete Response [CR]) as determined by RECIST Assess the safety and tolerability of AMG 479 Assess the duration of response Assess the clinical benefit rate Assess the progression free survival and overall survival                                                                                                                                                                                                                                                                                                                                                                                                                  | Phase 2         | 38  | October 2007  | October 27, 2016   |
| IGFR inhibitors | NCT00495846 | GH, IGF-I and Somatostatin Analogues in Hepatocellular Carcinoma                                                                                         | Completed | Advanced Hepatocellular Carcinoma                                                                                                                                                                                                                                                                                                                                                                                                                                                     | Drug: Octreotide-LAR, Lanreotide Autogel Other: Locoregional treatments                                                             | Prolongation of the survival curve (>6 months) Improvement of liver function, Reduction of biological markers of disease (if elevated before starting the treatment) Improvement of quality of life according with SF36 questionnaire                                                                                                                                                                                                                                                                                                                                                                                                                                                       | Phase 2 Phase 3 | 25  | April 2007    | August 17, 2009    |
| IGFR inhibitors | NCT02134340 | A Safety and Biodistribution Study of [I-124]-CPD-1028 Injection in Solid Tumours                                                                        | Completed | Cancer                                                                                                                                                                                                                                                                                                                                                                                                                                                                                | Drug: [I-124]-CPD-1028 Injection Biological: CPD-1061                                                                               | Evaluate safety of [I-124]-CPD-1028 Injection Obtain preliminary biodistribution data for [I-124]-CPD-1028 Measure blood and plasma clearance of [I-124]-CPD-1028 and levels of free [I-124]-Iodide Compare [I-124]-CPD-1028 uptake in tumours to IGF-1R expression Compare [I-124]-CPD-1028 PET/CT images to other imaging modalities                                                                                                                                                                                                                                                                                                                                                      | Phase 1         | 2   | June 2014     | October 18, 2016   |
| IGFR inhibitors | NCT00788333 | Combination Study of BMS-754807 and Herceptin® in Patients With Advanced or Metastatic Her-2-positive Breast Cancer                                      | Completed | Breast Cancer                                                                                                                                                                                                                                                                                                                                                                                                                                                                         | Drug: BMS-754807 Drug: trastuzumab (Herceptin®)                                                                                     | The dose escalation portion will determine the MTD and recommended Phase 2 dose or dose range of BMS-754807 when administered orally on a daily schedule in combination with trastuzumab administered at standard doses IV on a weekly basis Assess anti-tumor activity of combination at MTD of BMS-754807 (dose expansion cohort) Evaluate safety and tolerability of the combination regimen Assess effect of combination therapy on glucose metabolism Explore whether co-medication with oral anti-hyperglycemic agent can enable adequate tolerability of the combination therapy if BMS-754807 induces hyperglycemia Obtain BMS-754807 plasma concentrations vs time data for future | Phase 1 Phase 2 | 40  | July 2009     | July 13, 2012      |
| IGFR inhibitors | NCT02546544 | Eurosarc Trial of Linsitinib in Advanced Ewing Sarcoma                                                                                                   | Completed | Relapsed Ewing Sarcoma Refractory Ewing Sarcoma                                                                                                                                                                                                                                                                                                                                                                                                                                       | Drug: Linsitinib                                                                                                                    | Number of Participants With a Metabolic Response as Evaluated by PERCIST v1.0 Number of Participants With a Toxic Event Clinical Outcome (PFS, DSS) Pharmacokinetics Assays of Following Linsitinib Treatment (Plasma Concentrations of Linsitinib) Number of Participants With a Radiological Response as Evaluated by RECIST v1.1 Number of Participants With a Metabolic Response as Evaluated by EORTC                                                                                                                                                                                                                                                                                  | Phase 2         | 16  | March 2014    | June 3, 2019       |
| IGFR inhibitors | NCT00639509 | IMC-A12 in Treating Patients With Advanced Liver Cancer                                                                                                  | Completed | Adult Primary Hepatocellular Carcinoma Advanced Adult Primary Liver Cancer Localized Unresectable Adult Primary Liver Cancer Recurrent Adult Primary Liver                                                                                                                                                                                                                                                                                                                            | Biological: cixutumumab Procedure: computed tomography Procedure: contrast-enhanced magnetic resonance imaging                      | PFS Rate Best Overall Response Rate (ORR) Median Overall Survival                                                                                                                                                                                                                                                                                                                                                                                                                                                                                                                                                                                                                           | Phase 2         | 24  | March 2008    | May 23, 2014       |
| IGFR inhibitors | NCT02431676 | Survivorship Promotion In Reducing IGF-1 Trial                                                                                                           | Completed | Breast Cancer Prostate Cancer Lung Cancer Colon Cancer Melanoma of Skin Endometrial Cancer Liver Cancer Pancreatic Cancer Rectal Cancer Kidney Cancer Other Solid Malignant Tumors                                                                                                                                                                                                                                                                                                    | Drug: Metformin Behavioral: Coach Directed Behavioral Weight Loss Behavioral: Self-control weight loss                              | IGF-1 Levels IGF-1 to IGFBP3 Level Ratio (Molar Ratio)                                                                                                                                                                                                                                                                                                                                                                                                                                                                                                                                                                                                                                      | Phase 2         | 121 | May 2015      | September 16, 2020 |
| IGFR inhibitors | NCT00684983 | Capecitabine and Lapatinib Ditosylate With or Without Cixutumumab in Treating Patients With Previously Treated HER2-Positive Stage IIIB-IV Breast Cancer | Completed | HER2 Positive Breast Carcinoma Recurrent Breast Carcinoma Stage IIIB Breast Cancer AJCC v7 Stage IIIC Breast Cancer AJCC v7 Stage IV Breast Cancer AJCC v6 and v7                                                                                                                                                                                                                                                                                                                     | Drug: Capecitabine Biological: Cixutumumab Drug: Lapatinib Ditosylate Other: Quality-of-Life Assessment                             | Progression-free Survival (PFS) Overall Survival Time to Treatment Failure Confirmed Tumor Response, Defined as Either a Complete Response (CR) or Partial Response (PR) Noted as the Objective Status on 2 Consecutive Evaluations at Least 6 Weeks Apart, Assessed by Response Evaluation Criteria for Solid Tumors (RECIST) Duration of Response Adverse Event Profile of Capecitabine and Lapatinib With and Without IMC-                                                                                                                                                                                                                                                               | Phase 2         | 64  | July 2008     | March 24, 2020     |

|                 |             |                                                                                                                                        |           |                                                                                                                                                                                                               |                                                                                                                                                                                                                                                    |                                                                                                                                                                                                                                                                                                                                                                                                                                                                                                                                                                                                                                                                                                                                                                                                                                                                                                                                                                                                                                                                                                                                                                                                                                                                                                                                                                                                                                                                                                                                                                                                                                                                                                                                                                                                                                                                 |         |     |                  |                   |
|-----------------|-------------|----------------------------------------------------------------------------------------------------------------------------------------|-----------|---------------------------------------------------------------------------------------------------------------------------------------------------------------------------------------------------------------|----------------------------------------------------------------------------------------------------------------------------------------------------------------------------------------------------------------------------------------------------|-----------------------------------------------------------------------------------------------------------------------------------------------------------------------------------------------------------------------------------------------------------------------------------------------------------------------------------------------------------------------------------------------------------------------------------------------------------------------------------------------------------------------------------------------------------------------------------------------------------------------------------------------------------------------------------------------------------------------------------------------------------------------------------------------------------------------------------------------------------------------------------------------------------------------------------------------------------------------------------------------------------------------------------------------------------------------------------------------------------------------------------------------------------------------------------------------------------------------------------------------------------------------------------------------------------------------------------------------------------------------------------------------------------------------------------------------------------------------------------------------------------------------------------------------------------------------------------------------------------------------------------------------------------------------------------------------------------------------------------------------------------------------------------------------------------------------------------------------------------------|---------|-----|------------------|-------------------|
| IGFR inhibitors | NCT00474760 | Study Of Anti-IGF-1R CP-751,871 In Patients With Solid Tumors                                                                          | Completed | Sarcoma, Ewing's                                                                                                                                                                                              | Drug: CP-751,871                                                                                                                                                                                                                                   | Number of Participants With Treatment-emergent Adverse Events (AEs) and Serious Adverse Events (SAEs) Maximum Observed Plasma Concentration (Cmax) in Cycle 1 Maximum Observed Plasma Concentration (Cmax) in Cycle 4 Time to Reach Maximum Observed Plasma Concentration (Tmax) in Cycle 1 Time to Reach Maximum Observed Plasma Concentration (Tmax) in Cycle 4 Plasma Decay Half-Life (t1/2) in Cycle 1 Plasma Decay Half-Life (t1/2) in Cycle 4 Time to Reach Last Quantifiable Concentration (Tlast) in Cycle 1 Time to Reach Last Quantifiable Concentration (Tlast) in Cycle 4 Systemic Clearance (CL) in Cycle 1 Systemic Clearance (CL) in Cycle 4 Concentration at End of Infusion (Cendinf) in Cycle 1 Concentration at End of Infusion (Cendinf) in Cycle 4 Volume of Distribution (Vz) in Cycle 1 Volume of Distribution (Vz) in Cycle 4 Volume of Distribution at Steady State (Vss) in Cycle 1 Volume of Distribution at Steady State (Vss) in Cycle 4 Area Under the Curve From Time Zero to Last Quantifiable Concentration (AUClast) in Cycle 1 Area Under the Curve From Time Zero to Last Quantifiable Concentration (AUClast) in Cycle 4 Area Under the Curve From Time Zero to Extrapolated Infinite Time [AUC (0 - ∞)] in Cycle 1 Area Under the Plasma Concentration-time Profile From Time 0 to 504 Hours (21 Days) (AUC504) in Cycle 1 Area Under the Plasma Concentration-time Profile From Time 0 to 504 Hours (21 Days) (AUC504) in Cycle 4 Area Under the Plasma Concentration-time Profile From Time 0 to 672 Hours (28 Days) (AUC672) in Cycle 1 Area Under the Plasma Concentration-time Profile From Time 0 to 672 Hours (28 Days) (AUC672) in Cycle 4                                                                                                                                                                        | Phase 1 | 65  | August 2005      | December 17, 2013 |
| IGFR inhibitors | NCT01055314 | Temozolomide, Cixutumumab, and Combination Chemotherapy in Treating Patients With Metastatic Rhabdomyosarcoma                          | Completed | Adult Rhabdomyosarcoma Childhood Rhabdomyosarcoma Metastatic Childhood Soft Tissue Sarcoma Stage IV Adult Soft Tissue Sarcoma Untreated Childhood Rhabdomyosarcoma                                            | Biological: Cixutumumab Drug: Cyclophosphamide Biological: Dactinomycin Drug: Doxorubicin Hydrochloride Drug: Etoposide Drug: Ifosfamide Drug: Irinotecan Hydrochloride Other: Laboratory Biomarker Analysis Drug: Temozolomide Drug: Temozolomide | Feasibility of the Addition of Cixutumumab to Chemotherapy Determined by Patient Enrollment Feasibility of the Addition of Temozolomide to Chemotherapy Determined by Patient Enrollment Incidence of Adverse Events Assessed by Common Terminology Criteria for Adverse Events Version 4.0 Event-Free Survival Response Rate (CR + PR)                                                                                                                                                                                                                                                                                                                                                                                                                                                                                                                                                                                                                                                                                                                                                                                                                                                                                                                                                                                                                                                                                                                                                                                                                                                                                                                                                                                                                                                                                                                         | Phase 2 | 175 | January 2010     | August 29, 2017   |
| IGFR inhibitors | NCT01413191 | Cixutumumab in Treating Patients With Metastatic Melanoma of the Eye                                                                   | Completed | Ciliary Body and Choroid Melanoma, Medium/Large Size Ciliary Body and Choroid Melanoma, Small Size Iris Melanoma Metastatic Intraocular Melanoma Recurrent Intraocular Melanoma Stage IV Intraocular Melanoma | Biological: Cixutumumab Other: Laboratory biomarker analysis                                                                                                                                                                                       | Number of Participants With Response Disease Control Rate Duration of Response Progression-free Survival (PFS) Overall Survival (OS) Durable Response Rate                                                                                                                                                                                                                                                                                                                                                                                                                                                                                                                                                                                                                                                                                                                                                                                                                                                                                                                                                                                                                                                                                                                                                                                                                                                                                                                                                                                                                                                                                                                                                                                                                                                                                                      | Phase 2 | 18  | August 2011      | February 19, 2020 |
| IGFR inhibitors | NCT01725555 | A Study to Assess the Effect of Food on the Bioavailability of the IGF-1R Inhibitor AXL1717 in Patients With Advanced Malignant Tumors | Completed | Solid Tumors Hematological Malignancies                                                                                                                                                                       | Drug: Fasted treatment: AXL1717 Drug: Fed treatment: AXL1717                                                                                                                                                                                       | Single dose AXL1717 serum pharmacokinetic profile under fasting versus fed condition in each patient Safety of AXL1717 through adverse event reporting                                                                                                                                                                                                                                                                                                                                                                                                                                                                                                                                                                                                                                                                                                                                                                                                                                                                                                                                                                                                                                                                                                                                                                                                                                                                                                                                                                                                                                                                                                                                                                                                                                                                                                          | Phase 1 | 13  | October 2012     | April 7, 2014     |
| IGFR inhibitors | NCT01446159 | Study of MEDI-573 Plus Standard Endocrine Therapy for Women With Hormone-sensitive Metastatic Breast Cancer                            | Completed | Hormone-sensitive, HER-2 Negative Metastatic Breast Cancer                                                                                                                                                    | Drug: MEDI-573 Drug: Aromatase Inhibitor                                                                                                                                                                                                           | Phase 1b and Phase 2: Number of Participants With Treatment Emergent Adverse Events (TEAEs) and Treatment Emergent Serious Adverse Events (TESAEs) Phase 1b: Number of Participants With Dose-limiting Toxicities (DLTs) Phase 1b: Number of DLTs Phase 2: Progression-free Survival (PFS) Phase 1b and Phase 2: Number of Participants With Abnormal Clinical Laboratory Results Reported as TEAEs Phase 1b and Phase 2: Number of Participants With Abnormal Vital Signs Reported as TEAEs Phase 1b and Phase 2: Number of Participants With Abnormal Electrocardiogram (ECG) Reported as TEAEs Phase 2: Number of Participants With Best Overall Tumor Response Phase 2: Objective Response Rate (ORR) Phase 2: Time to Response Phase 2: Duration of Response (DR) Phase 2: Time to Progression (TTP) Phase 2: Overall Survival (OS) Phase 2: Change in Tumor Size Phase 1b and Phase 2: Area Under the Serum Concentration-time Curve From Time Zero to Day 21 (AUC0-day21) of MEDI-573 for Cycle 1 Phase 1b and Phase 2: Area Under the Serum Concentration-time Curve From Time Zero to Infinity (AUC0-inf) of MEDI-573 for Cycle 1 Phase 1b and Phase 2: Dose-Normalised Area Under the Serum Concentration-time Curve From Time Zero to Infinity (DN AUC0-inf) of MEDI-573 for Cycle 1 Phase 1b and Phase 2: Maximum Observed Serum Concentration (Cmax) of MEDI-573 for Cycle 1 Phase 1b and Phase 2: Time to Reach Maximum Observed Serum Concentration (Tmax) of MEDI-573 for Cycle 1 Phase 1b and Phase 2: Systemic Clearance (CL) of MEDI-573 for Cycle 1 Phase 1b and Phase 2: Systemic Clearance (CL) of MEDI-573 for Cycle 4 Phase 1b and Phase 2: Systemic Clearance (CL) of MEDI-573 for Cycle 4 Phase 1b and Phase 2: Systemic Clearance (CL) of MEDI-573 for Cycle 4 Phase 1b and Phase 2: Systemic Clearance (CL) of MEDI-573 for Cycle 4 | Phase 2 | 188 | June 13, 2011    | June 2, 2020      |
| IGFR inhibitors | NCT01288339 | Study Assessing Potential Predictive Tumor Markers in Metastatic Colorectal Cancer                                                     | Completed | Metastatic Colorectal Cancer                                                                                                                                                                                  | Drug: Panitumumab + FOLFOX (DP) Drug: Panitumumab + FOLFOX (no-DP)                                                                                                                                                                                 | Progression-free survival time according to the MMP7 status (PFS) Duration of response (DOR) Time to response (TTR) Time to treatment failure (TTF) Objective response rate (ORR) Disease Control Rate (DCR) Overall Survival (OS) Time to Progression (TTP) Duration of Stable Disease (DoSD) Incidence and severity of AEs Molecular                                                                                                                                                                                                                                                                                                                                                                                                                                                                                                                                                                                                                                                                                                                                                                                                                                                                                                                                                                                                                                                                                                                                                                                                                                                                                                                                                                                                                                                                                                                          | Phase 2 | 78  | November 8, 2010 | May 16, 2018      |
| IGFR inhibitors | NCT01061788 | A Trial of AMG 479, Everolimus (RAD001) and Panitumumab in Patients With Advanced Cancer - QUILT-3.007                                 | Completed | Advanced Solid Tumors, Non-small Cell Lung Cancer                                                                                                                                                             | Drug: AMG 479, Everolimus, Panitumumab                                                                                                                                                                                                             | To define the maximal tolerated dose (MTD) and/or recommended phase II dose (RPTD) for the doublet AMG 479 in combination with everolimus in subjects with advanced solid tumors. To define the maximal tolerated dose (MTD) and/or recommended phase II dose (RPTD) for the triplet AMG 479 in combination with everolimus and panitumumab in subjects with advanced solid tumors. To describe the toxicity profile seen with these combinations. To describe any signs of clinical activity, including response rate and                                                                                                                                                                                                                                                                                                                                                                                                                                                                                                                                                                                                                                                                                                                                                                                                                                                                                                                                                                                                                                                                                                                                                                                                                                                                                                                                      | Phase 1 | 43  | April 2010       | August 28, 2019   |
| IGFR inhibitors | NCT00882674 | A Study to Evaluate the Biological Activity of R1507 in Women With Operable Breast Cancer                                              | Completed | Breast Cancer                                                                                                                                                                                                 | Drug: RG1507                                                                                                                                                                                                                                       | Percent reduction in IGF-1R expression Correlation of R1507 pharmacokinetic parameters with biological changes in tumor tissue Adverse events, laboratory parameters                                                                                                                                                                                                                                                                                                                                                                                                                                                                                                                                                                                                                                                                                                                                                                                                                                                                                                                                                                                                                                                                                                                                                                                                                                                                                                                                                                                                                                                                                                                                                                                                                                                                                            | Phase 1 | 8   | July 2009        | November 2, 2016  |

|                 |             |                                                                                                                                                           |           |                                                                                                                                                                                                                                                                                                                                                                                                                                                                                                                                                                                                                                                                                                                                                                                                                                                                                                                                                                                                                                                             |                                                                                                                                 |                                                                                                                                                                                                                                                                                                                                                                                                                                                                                                                                                                                                                                                                                                                                                                               |         |    |                   |                    |
|-----------------|-------------|-----------------------------------------------------------------------------------------------------------------------------------------------------------|-----------|-------------------------------------------------------------------------------------------------------------------------------------------------------------------------------------------------------------------------------------------------------------------------------------------------------------------------------------------------------------------------------------------------------------------------------------------------------------------------------------------------------------------------------------------------------------------------------------------------------------------------------------------------------------------------------------------------------------------------------------------------------------------------------------------------------------------------------------------------------------------------------------------------------------------------------------------------------------------------------------------------------------------------------------------------------------|---------------------------------------------------------------------------------------------------------------------------------|-------------------------------------------------------------------------------------------------------------------------------------------------------------------------------------------------------------------------------------------------------------------------------------------------------------------------------------------------------------------------------------------------------------------------------------------------------------------------------------------------------------------------------------------------------------------------------------------------------------------------------------------------------------------------------------------------------------------------------------------------------------------------------|---------|----|-------------------|--------------------|
| IGFR inhibitors | NCT00551213 | A Study to Determine the Activity of Robatumumab (SCH 717454, MK-7454) in Participants With Relapsed or Recurrent Colorectal Cancer (P04721, MK-7454-003) | Completed | Colorectal Cancer                                                                                                                                                                                                                                                                                                                                                                                                                                                                                                                                                                                                                                                                                                                                                                                                                                                                                                                                                                                                                                           | Biological: Robatumumab Drug: Irinotecan Biological: Cetuximab Drug: Capecitabine Drug: FOLFOX Drug: CAPEOX/XELOX Drug: FOLFIRI | Number of Participants With a >20% Decrease in Positron Emission Tomography (PET)-Assessed Tumor Glucose Metabolism: Fluorodeoxyglucose (FDG) Standardized Uptake Value (SUV) in the Target Lesion Number of Participants Who Experienced One or More Adverse Events (AEs) Best Overall Tumor Response Per Investigator Review Number of Participants Who Discontinued Study Drug Due to an AE Best Overall Tumor Response Per Central Review Change From Baseline in Tumor Growth Rate                                                                                                                                                                                                                                                                                       | Phase 2 | 67 | November 21, 2007 | August 24, 2018    |
| IGFR inhibitors | NCT01614795 | Cixutumumab and Temozolomide in Treating Younger Patients With Recurrent or Refractory Sarcoma                                                            | Completed | Childhood Alveolar Soft Part Sarcoma Childhood Angiosarcoma Childhood Epithelioid Sarcoma Childhood Fibrosarcoma Childhood Gliosarcoma Childhood Leiomyosarcoma Childhood Liposarcoma Childhood Malignant Peripheral Nerve Sheath Tumor Childhood Synovial Sarcoma Previously Treated Childhood Rhabdomyosarcoma Recurrent Childhood Rhabdomyosarcoma Recurrent Childhood Soft Tissue Sarcoma Recurrent Ewing Sarcoma Peripheral Primitive Neuroectodermal Tumor Recurrent Osteosarcoma Rhabdomyosarcoma                                                                                                                                                                                                                                                                                                                                                                                                                                                                                                                                                    | Biological: Cixutumumab Other: Laboratory Biomarker Analysis Drug: Temozolomide                                                 | Objective Response Rate (PR or CR) by Response Evaluation Criteria in Solid Tumors (RECIST). Number of Cycles of Toxicity Progression-free Interval Expression Levels of IGF-1R, Insulin Receptor, ERK, RON, and mTOR Number of Patients With Detectable Bone Marrow Micrometastatic Disease Estimated as the Proportion of Eligible Patients Entered Into the Ewing Sarcoma Stratum Who Have Detectable Tumor Cells in the Marrow at Enrollment                                                                                                                                                                                                                                                                                                                              | Phase 2 | 46 | June 18, 2012     | December 11, 2018  |
| IGFR inhibitors | NCT00720174 | Cixutumumab and Doxorubicin Hydrochloride in Treating Patients With Unresectable, Locally Advanced, or Metastatic Soft Tissue Sarcoma                     | Completed | Adult Angiosarcoma Adult Desmoplastic Small Round Cell Tumor Adult Epithelioid Sarcoma Adult Extraskeletal Myxoid Chondrosarcoma Adult Extraskeletal Osteosarcoma Adult Fibrosarcoma Adult Leiomyosarcoma Adult Liposarcoma Adult Malignant Mesenchymoma Adult Malignant Peripheral Nerve Sheath Tumor Adult Rhabdomyosarcoma Adult Synovial Sarcoma Adult Undifferentiated High Grade Pleomorphic Sarcoma of Bone Childhood Angiosarcoma Childhood Desmoplastic Small Round Cell Tumor Childhood Epithelioid Sarcoma Childhood Fibrosarcoma Childhood Leiomyosarcoma Childhood Liposarcoma Childhood Malignant Mesenchymoma Childhood Malignant Peripheral Nerve Sheath Tumor Childhood Pleomorphic Rhabdomyosarcoma Childhood Rhabdomyosarcoma With Mixed Embryonal and Alveolar Features Childhood Synovial Sarcoma Dermatofibrosarcoma Protuberans Malignant Adult Hemangiopericytoma Malignant Childhood Hemangiopericytoma Metastatic Childhood Soft Tissue Sarcoma Previously Treated Childhood Rhabdomyosarcoma Recurrent Adult Soft Tissue Sarcoma | Biological: Cixutumumab Drug: Doxorubicin Hydrochloride Other: Laboratory Biomarker Analysis                                    | Maximally tolerated dose (MTD) of cixutumumab when administered in a combination regimen with fixed dose doxorubicin hydrochloride, in patients with locally advanced or metastatic soft tissue sarcoma Changes in cardiac function as measured by MUGA scans of the left ventricular ejection fraction Confirmed response rate (CR + PR) for comparison with doxorubicin treatment in similar historical patient populations Overall survival Progression-free survival                                                                                                                                                                                                                                                                                                      | Phase 1 | 30 | June 2008         | May 17, 2016       |
| IGFR inhibitors | NCT00699491 | Cixutumumab and Temozolomide in Treating Patients With Locally Recurrent or Metastatic Breast Cancer                                                      | Completed | Male Breast Carcinoma Recurrent Breast Carcinoma Stage IV Breast Cancer AJCC v6 and v7                                                                                                                                                                                                                                                                                                                                                                                                                                                                                                                                                                                                                                                                                                                                                                                                                                                                                                                                                                      | Biological: Cixutumumab Other: Laboratory Biomarker Analysis Other: Pharmacological Study Drug: Temozolomide                    | Recommended Dose Level for Phase II Testing (RPTD) (Phase I) Tumor Response Rate (TRR) (Complete Response [CR] or Partial Response [PR]) by the Response Evaluation Criteria in Solid Tumors (RECIST) (Phase II) Adverse Events Graded Using the NCI CTCAE Version. 3 (Phase II) Duration of Response (Phase II) Progression Free Survival (PFS) (Phase II) Progression Free Survival Rate Survival Time (Phase II)                                                                                                                                                                                                                                                                                                                                                           | Phase 1 | 48 | October 31, 2008  | June 13, 2018      |
| IGFR inhibitors | NCT00678769 | Cixutumumab and Temozolomide in Treating Patients With Locally Advanced or Metastatic Cancer                                                              | Completed | Malignant Neoplasm                                                                                                                                                                                                                                                                                                                                                                                                                                                                                                                                                                                                                                                                                                                                                                                                                                                                                                                                                                                                                                          | Drug: Cixutumumab Other: Laboratory Biomarker Analysis Other: Pharmacological Study Drug: Temozolomide                          | Change in phosphorylation levels of other biomarkers before and after treatment Change in phosphorylation levels of v-akt murine thymoma viral oncogene homolog 1 in terms of difference in IHC score MTD of combination of cixutumumab and temozolomide defined as the highest dose level at which no more than 1 of 6 evaluable patients has had a dose-limiting toxicity Tumor metabolism as assessed by PET scan before and after treatment Tumor response rate defined as CR + PR assessed by Response Evaluation Criteria in Solid Tumors and CHESON criteria                                                                                                                                                                                                           | Phase 1 | 72 | May 2008          | November 4, 2015   |
| IGFR inhibitors | NCT01560260 | Linsitinib in Treating Patients With Gastrointestinal Stromal Tumors                                                                                      | Completed | Carney Complex Chondrosarcoma Gastrointestinal Stromal Tumor Paraganglioma                                                                                                                                                                                                                                                                                                                                                                                                                                                                                                                                                                                                                                                                                                                                                                                                                                                                                                                                                                                  | Other: Laboratory Biomarker Analysis Drug: Linsitinib Other: Pharmacological Study                                              | Number of Participants With Complete Response or Partial Response Using Response Evaluation Criteria in Solid Tumors Guideline Version 1.1 Clinical Benefit Rate Defined as Stable Disease (SD) >= 9 Months, Partial Response (PR) or Complete Response (CR) Overall Survival (OS) Progression Free Survival (PFS) Response Duration Failure-free Survival Tolerability and Adverse Event Profile of Linsitinib Patterns of Protein Expression in Serum and Tumor Tissues as Predictors of Response and PFS Number of Participants With Metabolic Response to Linsitinib Using FDG-PET Changes in Tumor Metabolism by FDG-PET Qualitatively and Semi-quantitatively With Standard Uptake Value (SUV) Correlations Between Glucose, Insulin, Tumor Tissue and Blood Biomarkers | Phase 2 | 20 | March 2012        | September 21, 2018 |



|                 |             |                                                                                                                                                                                                  |           |                                                                                                                                           |                                                                                                    |                                                                                                                                                                                                                                                                                                                                                                                                                                                                                                                                                                                                                                                                                                                                                                                                                                                                                                                                                                                                                                                                                                                                                                                                                       |                 |     |                  |                    |
|-----------------|-------------|--------------------------------------------------------------------------------------------------------------------------------------------------------------------------------------------------|-----------|-------------------------------------------------------------------------------------------------------------------------------------------|----------------------------------------------------------------------------------------------------|-----------------------------------------------------------------------------------------------------------------------------------------------------------------------------------------------------------------------------------------------------------------------------------------------------------------------------------------------------------------------------------------------------------------------------------------------------------------------------------------------------------------------------------------------------------------------------------------------------------------------------------------------------------------------------------------------------------------------------------------------------------------------------------------------------------------------------------------------------------------------------------------------------------------------------------------------------------------------------------------------------------------------------------------------------------------------------------------------------------------------------------------------------------------------------------------------------------------------|-----------------|-----|------------------|--------------------|
| IGFR inhibitors | NCT01340040 | Dose-escalation Study to Assess Safety, Tolerability and Pharmacokinetics of MEDI-573 in Japanese Subjects                                                                                       | Completed | Cancer Advanced Solid Malignancies                                                                                                        | Drug: MEDI-573                                                                                     | Number of participants with adverse events (based on CTCAE version 4.0), laboratory values, vital sign measurements, ECG, Physical Examination Immunogenicity of MEDI-573 (by measuring anti-MEDI-573 antibodies) Anti-tumor activity of MEDI-573 using Response Evaluation Criteria in Solid Tumors(RECIST) Pharmacokinetics, - Cmax Pharmacokinetics, - Cmax at steady state (Cmax, ss) Pharmacokinetics - time to maximum concentration (tmax) Pharmacokinetics, - terminal elimination rate constant ( $\lambda_z$ ) Pharmacokinetics - (AUC(0-t)) Pharmacokinetics - total clearance and terminal phase (Vz) of MEDI-573 Pharmacodynamics: Insulin-like growth factor (IGF-I and IGF-II) or Safety as assessed per Cancer Therapy Evaluation Program (CTEP) Common Terminology Criteria for Adverse Events (CTCAE) version 4.0 Immunogenicity, via cellular immune response and humoral immune response, as assessed by the generation of IGFBP-2 specific T cells and IgG antibodies Epitope spreading with the generation of an IGFBP-2 Th1 immune response Levels of regulatory T- cells (Tregs) over the course of immunization to detect modulation of Tregs with vaccination Disease-free survival Overall | Phase 1         | 10  | July 2011        | December 11, 2014  |
| IGFR inhibitors | NCT01322802 | Vaccine Therapy in Treating Patients With Stage III-IV or Recurrent Ovarian Cancer                                                                                                               | Completed | Stage III Ovarian Epithelial Cancer Stage III Ovarian Germ Cell Tumor Stage IV Ovarian Epithelial Cancer Stage IV Ovarian Germ Cell Tumor | Biological: pUMVC3-hIGFBP-2 multi-epitope plasmid DNA vaccine Other: laboratory biomarker analysis | Number of Participants With Treatment Emergent Adverse Events (TEAEs) and Treatment Emergent Serious Adverse Events (SAEs) Number of Participants With Clinical Laboratory Abnormalities Reported as TEAEs Number of Participants With Vital Signs and Physical Findings Abnormalities Reported as TEAEs Maximum Tolerated Dose (MTD) of MEDI-573 Number of Participants With Dose-Limiting Toxicities (DLTs) Optimal Biologically Effective Dose (OBED) of MEDI-573 Maximum Observed Serum Concentration (Cmax) After the First Dose Time to Reach Maximum Observed Concentration (Tmax) After the First Dose Trough Serum Concentration (Ctrough) After the First Dose Dose Normalized Cmax (Cmax/Dose) After the First Dose Area Under the Serum Concentration-time Curve Over the First Dosing Interval (AUC $\tau$ ) Dose-normalized Area Under the Serum Concentration Time Curve Over the First Dosing Interval (AUC $\tau$ /Dose) Number of Participants With Positive Anti-Drug Antibodies (ADA) to MEDI-573 Objective Response Rate (ORR) Progression-free Survival (PFS) Time to                                                                                                                           | Phase 1         | 25  | March 6, 2012    | February 25, 2021  |
| IGFR inhibitors | NCT00957853 | Preoperative Treatment With Cetuximab and/or IMC-A12                                                                                                                                             | Completed | Head and Neck Squamous Cell Carcinoma                                                                                                     | Drug: Cetuximab Drug: IMC-A12 Procedure: Surgical tumor resection                                  | AKT Modulation Number of Participants With Objective Response                                                                                                                                                                                                                                                                                                                                                                                                                                                                                                                                                                                                                                                                                                                                                                                                                                                                                                                                                                                                                                                                                                                                                         | Phase 2         | 16  | October 17, 2011 | March 19, 2020     |
| IGFR inhibitors | NCT00816361 | A Dose-escalation Study to Evaluate the Safety, Tolerability, and Antitumor Activity of MEDI-573 in Subjects With Advanced Solid Tumors                                                          | Completed | Cancer                                                                                                                                    | Drug: MEDI-573                                                                                     | Number of Participants With Treatment Emergent Adverse Events (TEAEs) and Treatment Emergent Serious Adverse Events (SAEs) Number of Participants With Clinical Laboratory Abnormalities Reported as TEAEs Number of Participants With Vital Signs and Physical Findings Abnormalities Reported as TEAEs Maximum Tolerated Dose (MTD) of MEDI-573 Number of Participants With Dose-Limiting Toxicities (DLTs) Optimal Biologically Effective Dose (OBED) of MEDI-573 Maximum Observed Serum Concentration (Cmax) After the First Dose Time to Reach Maximum Observed Concentration (Tmax) After the First Dose Trough Serum Concentration (Ctrough) After the First Dose Dose Normalized Cmax (Cmax/Dose) After the First Dose Area Under the Serum Concentration-time Curve Over the First Dosing Interval (AUC $\tau$ ) Dose-normalized Area Under the Serum Concentration Time Curve Over the First Dosing Interval (AUC $\tau$ /Dose) Number of Participants With Positive Anti-Drug Antibodies (ADA) to MEDI-573 Objective Response Rate (ORR) Progression-free Survival (PFS) Time to                                                                                                                           | Phase 1         | 43  | March 9, 2009    | March 4, 2019      |
| IGFR inhibitors | NCT00970580 | A Study of BIIB022 in Combination With Paclitaxel and Carboplatin in Subjects With Non-Small Cell Lung                                                                                           | Completed | Non-Small Cell Lung Cancer                                                                                                                | Drug: BIIB022 With Paclitaxel and Carboplatin                                                      | To evaluate the safety and tolerability of BIIB022 in combination with paclitaxel and carboplatin                                                                                                                                                                                                                                                                                                                                                                                                                                                                                                                                                                                                                                                                                                                                                                                                                                                                                                                                                                                                                                                                                                                     | Phase 1         | 18  | October 2009     | September 16, 2013 |
| IGFR inhibitors | NCT00617708 | S0727 Gemcitabine Hydrochloride and Erlotinib Hydrochloride With or Without Monoclonal Antibody Therapy in Treating Patients With Metastatic Pancreatic Cancer That Cannot Be Removed By Surgery | Completed | Stage IV Pancreatic Cancer                                                                                                                | Biological: cixutumumab Drug: erlotinib hydrochloride Drug: gemcitabine hydrochloride              | Maximum Tolerated Dose Determination Progression-Free Survival Overall Survival Response Toxicity                                                                                                                                                                                                                                                                                                                                                                                                                                                                                                                                                                                                                                                                                                                                                                                                                                                                                                                                                                                                                                                                                                                     | Phase 1 Phase 2 | 134 | March 2008       | July 31, 2014      |
| IGFR inhibitors | NCT00974896 | QUILT-2.016: Study of AMG 479 With Biologics or Chemotherapy for Subjects With Advanced Solid Tumors                                                                                             | Completed | Advanced Malignancy Advanced Solid Tumors Cancer Solid Tumors Tumors                                                                      | Drug: AMG 479                                                                                      | To assess the safety, tolerability, and pharmacokinetic profiles of AMG 479 when used in combination with bevacizumab, sorafenib, panitumumab, erlotinib or gemcitabine in subjects with advanced solid tumors To evaluate pharmacokinetic (PK) profiles of biologics or chemotherapy when used in combination with AMG 479 To evaluate tumor response as assessed by World Health Organization (WHO) criteria To evaluate tumor response as measured by volumetric computed tomography (CT) To evaluate anti-AMG                                                                                                                                                                                                                                                                                                                                                                                                                                                                                                                                                                                                                                                                                                     | Phase 1         | 46  | December 2006    | October 27, 2016   |
| IGFR inhibitors | NCT01536145 | CP-751,871 Treatment For Patients With Multiple Myeloma                                                                                                                                          | Completed | Multiple Myeloma                                                                                                                          | Drug: CP-751,871                                                                                   | Maximum Tolerated Dose (MTD) Single Dose End-of-infusion Concentration (Cinf) for CP-751,871 Single Dose Area Under the Curve From Time Zero to Last Quantifiable Concentration (AUClast) for CP-751,871 Single Dose Volume of Distribution (Vz) for CP-751,871 Single Dose Plasma Decay Half-life (t1/2) for CP-751,871 Single Dose Area Under the Curve From Time Zero to Extrapolated Infinite Time [AUC (0 - $\infty$ )] for CP-751,871 Single Dose Volume of Distribution at Steady State (Vss) for CP-751,871 Single Dose Systemic Clearance (CL) for CP-751,871 Multiple Dose Cinf for CP-751,871 Multiple Dose Minimum Observed Plasma Trough Concentration (Cmin) for CP-751,871 Pharmacodynamic-based Dose Human Anti-human Antibody (HAHA) Response to CP-751,871 Percentage of Participants With Objective Response (OR) Time to Disease Progression                                                                                                                                                                                                                                                                                                                                                      | Phase 1         | 47  | December 2003    | March 15, 2013     |
| IGFR inhibitors | NCT00630552 | QUILT-2.019: A Study of AMG 655 or AMG 479 in Combination With Gemcitabine for Treatment of Metastatic Pancreatic Cancer                                                                         | Completed | Adenocarcinoma of the Pancreas Metastatic Pancreatic Cancer Pancreatic Cancer                                                             | Other: Placebo Drug: AMG 479 Drug: AMG 655                                                         | Survival Safety Safety and Efficacy Endpoints Overall Survival Time to Response                                                                                                                                                                                                                                                                                                                                                                                                                                                                                                                                                                                                                                                                                                                                                                                                                                                                                                                                                                                                                                                                                                                                       | Phase 1 Phase 2 | 138 | June 2007        | October 27, 2016   |
| IGFR inhibitors | NCT00956436 | Sorafenib With BIIB022 in Hepatocellular Carcinoma (HCC)                                                                                                                                         | Completed | Hepatocellular Carcinoma                                                                                                                  | Drug: BIIB022 Drug: Sorafenib                                                                      | To evaluate the safety and tolerability of BIIB022 given once every 3 weeks in combination with sorafenib in subjects with advanced HCC. To evaluate the PK profile of BIIB022 and sorafenib in this study population To assess the anti-tumor response in this study                                                                                                                                                                                                                                                                                                                                                                                                                                                                                                                                                                                                                                                                                                                                                                                                                                                                                                                                                 | Phase 1         | 40  | August 2009      | September 16, 2013 |
| IGFR inhibitors | NCT00986674 | Carboplatin and Paclitaxel Combined With Cetuximab and/or IMC-A12 in Patients With Advanced Non-Small Cell Lung Cancer                                                                           | Completed | Recurrent Non-small Cell Lung Cancer Stage IIIB Non-small Cell Lung Cancer Stage IV Non-small Cell Lung Cancer                            | Biological: cixutumumab Drug: carboplatin Drug: paclitaxel Biological: cetuximab                   | Progression Free Survival Overall Survival Response Rate                                                                                                                                                                                                                                                                                                                                                                                                                                                                                                                                                                                                                                                                                                                                                                                                                                                                                                                                                                                                                                                                                                                                                              | Phase 2         | 140 | September 2009   | September 26, 2014 |

|                 |             |                                                                                                                                                                |           |                                                                                                   |                                                                                                                                         |                                                                                                                                                                                                                                                                                                                                                                                                                                                                                                                                                                                                                                                                                                                                                                                                                                                                                                                                                                                                                                                                                                                                                                                                                                                                                                                                                                                |                 |     |                  |                   |
|-----------------|-------------|----------------------------------------------------------------------------------------------------------------------------------------------------------------|-----------|---------------------------------------------------------------------------------------------------|-----------------------------------------------------------------------------------------------------------------------------------------|--------------------------------------------------------------------------------------------------------------------------------------------------------------------------------------------------------------------------------------------------------------------------------------------------------------------------------------------------------------------------------------------------------------------------------------------------------------------------------------------------------------------------------------------------------------------------------------------------------------------------------------------------------------------------------------------------------------------------------------------------------------------------------------------------------------------------------------------------------------------------------------------------------------------------------------------------------------------------------------------------------------------------------------------------------------------------------------------------------------------------------------------------------------------------------------------------------------------------------------------------------------------------------------------------------------------------------------------------------------------------------|-----------------|-----|------------------|-------------------|
| IGFR inhibitors | NCT01120236 | Bicalutamide and Goserelin or Leuprolide Acetate With or Without Cixutumumab in Treating Patients With Newly Diagnosed Metastatic                              | Completed | Prostate Adenocarcinoma Recurrent Prostate Carcinoma Stage IV Prostate Cancer                     | Drug: Bicalutamide Biological: Cixutumumab Drug: Goserelin Acetate Other: Laboratory Biomarker Analysis Drug: Leuprolide Acetate Other: | Undetectable PSA Rate Toxicity Proportion of Patients Who do Not Achieve a Partial PSA Response Accuracy of the Prognostic Model of Undetectable PSA (Developed From SWOG-9346) Correlation of microRNA Measures With 28-week PSA Response Correlation of microRNA Measures With Baseline Circulating Tumor Cell (CTC)                                                                                                                                                                                                                                                                                                                                                                                                                                                                                                                                                                                                                                                                                                                                                                                                                                                                                                                                                                                                                                                         | Phase 2         | 211 | December 2010    | February 26, 2018 |
| IGFR inhibitors | NCT00965250 | Multicenter Phase II Study of IMC-A12 in Patients With Thymoma and Thymic Carcinoma Who Have Been Previously Treated With Chemotherapy                         | Completed | Thymoma Thymic Carcinoma Thymic Carcinoid Thymic Neuroendocrine Tumors                            | Drug: IMC-12                                                                                                                            | Objective Response Rate (Partial Response (PR)+Complete Response (CR)) to IMC-A12 Monotherapy in Patients With Advanced or Recurrent Thymoma or Thymic Carcinoma Number of Participants With Adverse Events Percentage of Participants Who Respond to Treatment Disease Control Rate (DCR) Time to Progression Overall Survival Median Number of Cycles of Therapy Correlate Response to Therapy With                                                                                                                                                                                                                                                                                                                                                                                                                                                                                                                                                                                                                                                                                                                                                                                                                                                                                                                                                                          | Phase 2         | 49  | August 2009      | December 23, 2016 |
| IGFR inhibitors | NCT01411787 | Bootcamp During Neoadjuvant Chemotherapy for Breast Cancer                                                                                                     | Completed | Breast Cancer                                                                                     | Behavioral: Exercise                                                                                                                    | Ki-67 index Pathologic complete response rate                                                                                                                                                                                                                                                                                                                                                                                                                                                                                                                                                                                                                                                                                                                                                                                                                                                                                                                                                                                                                                                                                                                                                                                                                                                                                                                                  | Not Applicable  | 11  | March 2009       | May 11, 2018      |
| IGFR inhibitors | NCT00001436 | A Phase I Study of OncoLAR® (Registered Trademark) (NSC 685403) With/Without Tamoxifen in Patients With Osteosarcoma                                           | Completed | Neoplasm Metastasis Osteosarcoma                                                                  | Drug: OncoLAR® (Registered Trademark) Drug: tamoxifen                                                                                   |                                                                                                                                                                                                                                                                                                                                                                                                                                                                                                                                                                                                                                                                                                                                                                                                                                                                                                                                                                                                                                                                                                                                                                                                                                                                                                                                                                                | Phase 1         | 24  | May 1995         | March 4, 2008     |
| IGFR inhibitors | NCT00924989 | A Study of OSI-906 in Patients With Locally Advanced or Metastatic Adrenocortical Carcinoma                                                                    | Completed | Adrenocortical Carcinoma                                                                          | Drug: OSI-906 Other: Placebo                                                                                                            | Overall survival of single agent OSI-906 versus placebo Progression-free survival Disease control rate Best overall response rate Duration of response Time to deterioration in Quality of Life Safety assessed via physical exams, vital signs, laboratory assessments, electrocardiograms, and adverse events                                                                                                                                                                                                                                                                                                                                                                                                                                                                                                                                                                                                                                                                                                                                                                                                                                                                                                                                                                                                                                                                | Phase 3         | 139 | December 1, 2009 | September 5, 2018 |
| IGFR inhibitors | NCT01276379 | Study Evaluating Biomarkers in Patients With Colorectal Cancer and Native KRAS Treated With                                                                    | Completed | Colorectal Cancer                                                                                 | Drug: FOLFIRI (m) Drug: FOLFOX-6 (m) Drug: Cetuximab                                                                                    | Progression free survival Overall survival Response duration Toxicity Secondary biomarkers analysis Tumoral response                                                                                                                                                                                                                                                                                                                                                                                                                                                                                                                                                                                                                                                                                                                                                                                                                                                                                                                                                                                                                                                                                                                                                                                                                                                           | Phase 2         | 221 | January 2011     | May 11, 2018      |
| IGFR inhibitors | NCT00788957 | Panitumumab Combination Study With Rilotumumab or Ganitumab in Wild-type Kirsten Rat Sarcoma Virus Oncogene Homolog (KRAS) Metastatic Colorectal Cancer (mCRC) | Completed | Colon Cancer Colorectal Cancer Gastrointestinal Cancer Metastatic Colorectal Cancer Rectal Cancer | Drug: Panitumumab Drug: Ganitumab Drug: Rilotumumab Drug: Placebo                                                                       | Part 1: Number of Participants With Dose-limiting Toxicities (DLT) Part 2: Percentage of Participants With an Objective Response Part 2: Duration of Response Part 2: Time to Response Part 2: Percentage of Participants With Disease Control Progression-free Survival On-treatment Progression-free Survival Overall Survival Number of Participants With Adverse Events (AEs) Number of Participants With Grade 3 or Higher Laboratory Toxicities Number of Participants With Antibody Formation to Panitumumab, Rilotumumab and Ganitumab Part 1: Maximum Observed Drug Concentration (Cmax) and Minimum Drug Concentration (Cmin) for Panitumumab and Rilotumumab Part 1: Area Under the Drug Concentration-time Curve During a Dosing Interval (AUCtau) for Panitumumab and Rilotumumab Part 2: Maximum Observed Drug Concentration During the Dosing Interval (Cmax) for Panitumumab Part 2: Minimum Observed Drug Concentration During the Dosing Interval (Cmin) for Panitumumab Part 2: Maximum Observed Drug Concentration During the Dosing Interval (Cmax) for Rilotumumab Part 2: Minimum Observed Drug Concentration During the Dosing Interval (Cmin) for Rilotumumab Part 2: Maximum Observed Drug Concentration During the Dosing Interval (Cmax) for Ganitumab Part 2: Minimum Observed Drug Concentration During the Dosing Interval (Cmin) for Ganitumab | Phase 1 Phase 2 | 153 | October 2008     | July 20, 2015     |
| IGFR inhibitors | NCT00889382 | A Study Evaluating Intermittent and Continuous OSI-906 and Weekly Paclitaxel in Patients With Recurrent Epithelial Ovarian Cancer (and Other Solid Tumors)     | Completed | Ovarian Cancer Solid Tumors                                                                       | Drug: OSI-906 Drug: Paclitaxel                                                                                                          | Determine Maximum Tolerated Dose (MTD) and Recommended Phase 2 Dose (RP2D) Progression Free Survival (PFS) Objective Response Rate (ORR) Cancer Antigen 125 (CA125) Response Rate Duration of Response (DOR) Duration of CA-125 Response (CA-125 DOR) Overall Survival (OS) Safety assessed via physician exam, vital signs, clinical laboratory tests, electrocardiograms (ECG), and adverse events                                                                                                                                                                                                                                                                                                                                                                                                                                                                                                                                                                                                                                                                                                                                                                                                                                                                                                                                                                           | Phase 1 Phase 2 | 152 | August 2009      | November 5, 2019  |

|                 |             |                                                                                                                                                                                                 |           |                                  |                                                                                 |                                                                                                                                                                                                                                                                                                                                                                                                                                                                                                                                                                                                                                                                                                                                                                                                                                                                                                                                                                                                                                                                                                                                                                                                                                                                                                                                                                                                                                                                                                                                                                                                                                                                                                                                                                                                                                                                                                                                                                                                                                                                                                                                                                                                                                                                                                                                                                                         |                 |     |               |                    |
|-----------------|-------------|-------------------------------------------------------------------------------------------------------------------------------------------------------------------------------------------------|-----------|----------------------------------|---------------------------------------------------------------------------------|-----------------------------------------------------------------------------------------------------------------------------------------------------------------------------------------------------------------------------------------------------------------------------------------------------------------------------------------------------------------------------------------------------------------------------------------------------------------------------------------------------------------------------------------------------------------------------------------------------------------------------------------------------------------------------------------------------------------------------------------------------------------------------------------------------------------------------------------------------------------------------------------------------------------------------------------------------------------------------------------------------------------------------------------------------------------------------------------------------------------------------------------------------------------------------------------------------------------------------------------------------------------------------------------------------------------------------------------------------------------------------------------------------------------------------------------------------------------------------------------------------------------------------------------------------------------------------------------------------------------------------------------------------------------------------------------------------------------------------------------------------------------------------------------------------------------------------------------------------------------------------------------------------------------------------------------------------------------------------------------------------------------------------------------------------------------------------------------------------------------------------------------------------------------------------------------------------------------------------------------------------------------------------------------------------------------------------------------------------------------------------------------|-----------------|-----|---------------|--------------------|
| IGFR inhibitors | NCT00147537 | Combination Study Of CP-751,871 With Paclitaxel And Carboplatin In Advanced Lung Cancer                                                                                                         | Completed | Carcinoma, Non-Small-Cell Lung   | Drug: CP-751,871 Drug: paclitaxel Drug: carboplatin Drug: erlotinib             | Maximum Tolerated Dose (MTD) of CP-751,871 in Combination With Paclitaxel and Carboplatin: Phase 1b Recommended Phase 2 Dose (RP2D): Phase 1b Objective Response Rate: Phase 2 Objective Response Rate in Non-Adenocarcinoma Participants: Phase 2 Objective Response Rate: Phase 1b Number of Participants With Positive Human Anti-human Antibody (HAHA) Values: Phase 1b Number of Circulating Endothelial Cells (CECs): Phase 1b Number of Circulating Tumor-Related Cells (CTCs) and CTC Insulin-Like Growth Factor 1 Receptor (IGF-IR) Expression: Phase 1b Plasma Concentration of CP-751,871 at the End of Infusion (Cendinf) for Cycle 1 in Phase 1b Plasma Concentration of CP-751,871 at the End of Infusion (Cendinf) for Cycle 4 in Phase 1b Area Under the Curve From Time Zero to 504 Hours [AUC (0-504)] Post Infusion of CP-751,871 for Cycle 1 in Phase 1b Area Under the Curve From Time Zero to 504 Hours [AUC (0-504)] Post Infusion of CP-751,871 for Cycle 4 in Phase 1b Area Under the Curve From Time Zero Extrapolated to Infinite Time [AUCinf] for CP-751,871 for Cycle 1 in Phase 1b Plasma Decay Half-Life (t1/2) of CP-751,871 for Cycle 1 in Phase 1b Plasma Decay Half-Life (t1/2) of CP-751,871 for Cycle 4 in Phase 1b CP-751,871 Concentration at 504 Hours Post Dose (C504) for Cycle 1 (End of the 21-day Cycle) in Phase 1b CP-751,871 Concentration at 504 Hours Post Dose (C504) for Cycle 4 (End of the 21-day Cycle) in Phase 1b Accumulation of CP-751,871 Ratio (Cycle 4 AUC504 / Cycle 1 AUC504) (Rac) in Phase 1b Area Under the Curve From Time Zero to Last Quantifiable Concentration of CP-751,871 (AUClast) for Cycle 1 in Phase 1b Area Under the Curve From Time Zero to Last Quantifiable Concentration of CP-751,871 (AUClast) for Cycle 4 in Phase 1b Maximum Observed Plasma CP-751,871 Concentration (Cmax) for Cycle 1 in Phase 1b Maximum Observed Plasma CP-751,871 Concentration (Cmax) for Cycle 4 in Phase 1b Number of Participants With Positive Human Anti-human Antibody (HAHA) Values: Phase 2 M.D. Anderson Symptom Assessment Inventory (MDASI) in Phase 2 The European Organization for the Research and Treatment of Cancer Quality of Life Questionnaire Version 3.0 (EORTC-QLQ-C30-LC13) in Phase 2 Apparent Volume of CP-751,871 Distribution (Vd) for Cycle 4 in Phase 2 Clearance (CL) of CP-751,871 for | Phase 1 Phase 2 | 282 | February 2005 | October 30, 2013   |
| IGFR inhibitors | NCT00813605 | QUILT-2.018: Safety & Efficacy of FOLFIRI With AMG 479 or AMG 655 vs FOLFIRI Alone in KRAS-mutant Metastatic Colorectal Carcinoma                                                               | Completed | Metastatic Colorectal Cancer     | Other: FOLFIRI Biological: AMG 655 Other: Placebo Biological: AMG 479           | Progression Free Survival Overall Survival, Objective Response, Duration of Response, Time to Response Incidence of adverse events Significant laboratory abnormalities Incidence of antibody formation                                                                                                                                                                                                                                                                                                                                                                                                                                                                                                                                                                                                                                                                                                                                                                                                                                                                                                                                                                                                                                                                                                                                                                                                                                                                                                                                                                                                                                                                                                                                                                                                                                                                                                                                                                                                                                                                                                                                                                                                                                                                                                                                                                                 | Phase 2         | 155 | March 2009    | October 27, 2016   |
| IGFR inhibitors | NCT00781911 | A Study of Cixutumumab (IMC-A12) in Islet Cell Cancer                                                                                                                                           | Completed | Carcinoma Neuroendocrine Tumors  | Biological: Cixutumumab Drug: depot octreotide                                  | Percentage of Participants With Progression-Free Survival (PFS) Rate at Six Months Percentage of Participants Who Achieve Modified Objective Response Rate (ORR) of Complete Response (CR), Partial Response (PR) and Minor Response (MR) Modified Objective Response Rate (mORR) Percentage of Participants With a Biochemical Response Rate Number of Participants Reporting Treatment-Emergent Adverse Events (TEAEs) Pharmacokinetics (PK): Maximum Concentration (Cmax) Cycle 1 PK: Half-life (t 1/2) Cycle 1 PK: Area Under Concentration (AUCinf) Cycle 1 PK: Clearance (CL) Cycle 1 PK: Volume at Steady State (Vss) Cycle 1 Serum Anti-Cixutumumab Antibody Assessment Pharmacodynamics Markers: Concentration of                                                                                                                                                                                                                                                                                                                                                                                                                                                                                                                                                                                                                                                                                                                                                                                                                                                                                                                                                                                                                                                                                                                                                                                                                                                                                                                                                                                                                                                                                                                                                                                                                                                              | Phase 2         | 43  | February 2009 | September 20, 2019 |
| IGFR inhibitors | NCT01223833 | A Prospective Assessment of Loss of Grip Strength by Baseline BMI in Breast Cancer Patients Receiving Adjuvant Aromatase Inhibitors and                                                         | Completed | Breast Cancer Arthralgia         |                                                                                 | To assess the effect of BMI on loss of grip strength measured by a modified sphygmomanometer with baseline, month 3, month 6 and month 12 measurements. IGF-1, GH and IGFBP-3 levels                                                                                                                                                                                                                                                                                                                                                                                                                                                                                                                                                                                                                                                                                                                                                                                                                                                                                                                                                                                                                                                                                                                                                                                                                                                                                                                                                                                                                                                                                                                                                                                                                                                                                                                                                                                                                                                                                                                                                                                                                                                                                                                                                                                                    |                 | 296 | April 2009    | July 25, 2013      |
| IGFR inhibitors | NCT01221077 | Study of Erlotinib (Tarceva®) in Combination With OSI-906 in Patients With Advanced Non-small Cell Lung Cancer (NSCLC) With Activating Mutations of the Epidermal Growth Factor Receptor (EGFR) | Completed | NSCLC Non Small Cell Lung Cancer | Drug: OSI-906 Drug: Erlotinib Drug: Placebo                                     | Progression-free survival of OSI-906 in combination with Erlotinib or Erlotinib plus placebo Overall Survival (OS) Disease Control Rate (DCR) Best Overall Response Rate Duration of Response (CR/PR) Safety assessed through evaluation of adverse events, laboratory, physical examination, and Electrocardiogram (ECG) data                                                                                                                                                                                                                                                                                                                                                                                                                                                                                                                                                                                                                                                                                                                                                                                                                                                                                                                                                                                                                                                                                                                                                                                                                                                                                                                                                                                                                                                                                                                                                                                                                                                                                                                                                                                                                                                                                                                                                                                                                                                          | Phase 2         | 88  | April 2011    | January 24, 2019   |
| IGFR inhibitors | NCT01733004 | A Phase 1 Study of MM-141 in Patients With Advanced Solid                                                                                                                                       | Completed | Hepatocellular Carcinoma         | Drug: MM-141                                                                    | Severity and number of adverse events related to escalating doses of MM-141                                                                                                                                                                                                                                                                                                                                                                                                                                                                                                                                                                                                                                                                                                                                                                                                                                                                                                                                                                                                                                                                                                                                                                                                                                                                                                                                                                                                                                                                                                                                                                                                                                                                                                                                                                                                                                                                                                                                                                                                                                                                                                                                                                                                                                                                                                             | Phase 1         | 42  | November 2012 | August 4, 2016     |
| IGFR inhibitors | NCT00799240 | MK-0646 Insulin Growth Factor 1 Receptor Antibody in Stage IIb or IV Metastatic Non-Squamous Lung                                                                                               | Completed | Non Small Cell Lung Cancer       | Drug: Arm A: Pemetrexed Cisplatin Drug: Arm B Pemetrexed, Cisplatin and MK-0646 | Compare response rate between the two arms. Progression-free survival, overall survival and Toxicity profile Exploratory Objectives: Assess biomarkers of Pemetrexed, IGF-1R and immunogenicity of MK-0646.                                                                                                                                                                                                                                                                                                                                                                                                                                                                                                                                                                                                                                                                                                                                                                                                                                                                                                                                                                                                                                                                                                                                                                                                                                                                                                                                                                                                                                                                                                                                                                                                                                                                                                                                                                                                                                                                                                                                                                                                                                                                                                                                                                             | Phase 2         | 27  | June 2009     | November 7, 2014   |
| IGFR inhibitors | NCT02399137 | A Phase 2 Study of MM-141 Plus Nab-paclitaxel and Gemcitabine in Front-line Metastatic Pancreatic                                                                                               | Completed | Pancreatic Cancer                | Drug: MM-141 Drug: Placebo Drug: Gemcitabine Drug: Nab-Paclitaxel               | Progression Free Survival Overall Survival Objective Response Rate according to RECIST v1.1 Duration of Response according to RECIST v1.1 Rate of adverse events reported with the combination of MM-141 with nab-paclitaxel and gemcitabine versus the                                                                                                                                                                                                                                                                                                                                                                                                                                                                                                                                                                                                                                                                                                                                                                                                                                                                                                                                                                                                                                                                                                                                                                                                                                                                                                                                                                                                                                                                                                                                                                                                                                                                                                                                                                                                                                                                                                                                                                                                                                                                                                                                 | Phase 2         | 88  | May 2015      | September 18, 2018 |
| IGFR inhibitors | NCT00769795 | Study of Effectiveness of IMC-A12 Antibody Combined With Hormone Therapy Prior to Surgery to Treat Prostate Cancer                                                                              | Completed | Prostate Cancer                  | Drug: IMC-A12 Drug: Bicalutamide Drug: Goserelein                               | The primary endpoint of the study is to determine the effects of combining androgen deprivation with IMC-A12 on pathologic tumor stage (pathologic complete response).                                                                                                                                                                                                                                                                                                                                                                                                                                                                                                                                                                                                                                                                                                                                                                                                                                                                                                                                                                                                                                                                                                                                                                                                                                                                                                                                                                                                                                                                                                                                                                                                                                                                                                                                                                                                                                                                                                                                                                                                                                                                                                                                                                                                                  | Phase 2         | 29  | October 2008  | March 29, 2017     |

|                 |             |                                                                                                                                                                                                     |           |                                                                                                                                                                                                                                                                                       |                                                                                                             |                                                                                                                                                                                                                                                                                                                                                                                                                                                                                                                                                                                                                                                                                                                                                                                                                                                                                                                                                                                                                                                                                                                                                                                                                                                                                                                                                                                                                                                                                                                                                                                                                                                |                 |     |                   |                    |
|-----------------|-------------|-----------------------------------------------------------------------------------------------------------------------------------------------------------------------------------------------------|-----------|---------------------------------------------------------------------------------------------------------------------------------------------------------------------------------------------------------------------------------------------------------------------------------------|-------------------------------------------------------------------------------------------------------------|------------------------------------------------------------------------------------------------------------------------------------------------------------------------------------------------------------------------------------------------------------------------------------------------------------------------------------------------------------------------------------------------------------------------------------------------------------------------------------------------------------------------------------------------------------------------------------------------------------------------------------------------------------------------------------------------------------------------------------------------------------------------------------------------------------------------------------------------------------------------------------------------------------------------------------------------------------------------------------------------------------------------------------------------------------------------------------------------------------------------------------------------------------------------------------------------------------------------------------------------------------------------------------------------------------------------------------------------------------------------------------------------------------------------------------------------------------------------------------------------------------------------------------------------------------------------------------------------------------------------------------------------|-----------------|-----|-------------------|--------------------|
| IGFR inhibitors | NCT01327612 | Open Label Extension Study of Conatumumab and Ganitumab (AMG 479)                                                                                                                                   | Completed | Advanced Solid Tumors Carcinoid Colorectal Cancer Locally Advanced Lymphoma Metastatic Cancer Non-Small Cell Lung Cancer Sarcoma Solid Tumors                                                                                                                                         | Drug: Modified FOLFOX6 Biological: Conatumumab Biological: Ganitumab Biological: Bevacizumab                | Number of Participants With Adverse Events Number of Participants With Serious Adverse Events Maximum Change From Baseline in Blood Pressure Minimum Change From Baseline in Blood Pressure Number of Participants With CTCAE Grade 3 or Higher Clinical Laboratory Toxicities Best Overall Response Number of Participants With Disease Progression or Death Due to Disease Progression                                                                                                                                                                                                                                                                                                                                                                                                                                                                                                                                                                                                                                                                                                                                                                                                                                                                                                                                                                                                                                                                                                                                                                                                                                                       | Phase 2         | 12  | March 3, 2011     | February 21, 2021  |
| FGFR inhibitors | NCT02325739 | FGF401 in HCC and Solid Tumors Characterized by Positive FGFR4 and KLB Expression                                                                                                                   | Completed | Hepatocellular Carcinoma (HCC) Solid Malignancies                                                                                                                                                                                                                                     | Drug: FGF401 Biological: PDR001                                                                             | Number of Participants With Dose-limiting Toxicity (DLT): Phase I Only Time to Progression (TTP): Group 1 & Group 2 (Phase II Only) Overall Response Rate (ORR) Based on Local Assessment: Group 3 (Phase II Only) Best Overall Response (BOR) by Investigator Assessment: Phase I and Phase II Overall Response Rate (ORR) by Investigator Assessment Phase I and FGF401 Single Agent Phase II Groups 1 & 2 Disease Control Rate (DCR) by Local Investigator Assessment Phase I and FGF401 Single Agent Phase II Groups 1, 2 & 3 Time to Progression (TTP) in Participants Dosed With Single Agent FGF401 120 mg (Fasted & Fed) & With Combination FGF401 120 mg + PDR001 300 mg Q3W (Phase I) Overall Survival (OS) in Participants Dosed With Single Agent FGF401 120 mg (Fasted & Fed) and in Participants Dosed With Combination FGF401 120 mg and PDR001 300 mg Q3W (Phase I & II) Progression-free Survival (PFS) - FGF401 Single Agent Phase II: Group 3 Presence and/or Concentration of Anti-PDR001 Antibodies Cmax of PDR001 in Combination With FGF401: Phase I AUClast and AUCtinf of PDR001 in Combination of FGF401: Phase I T1/2 of PDR001: Phase I Cmax of FGF401: Phase II Cmax of FGF401 in Combination With PDR001: Phase II AUCinf Recommended Dose for Phase 2 Studies : Maximum Tolerated Dose (MTD) Number of Participants With Treatment-Emergent Adverse Events Percentage of Participants With Best Overall Response Rate (BORR) and Objective Response Rate (ORR) Pharmacokinetics (PK): Maximum Observed Concentration (Cmax) of LY2874455 Pharmacokinetics (PK): Area Under the Concentration vs Time Curve 0 to | Phase 1 Phase 2 | 172 | December 29, 2014 | December 17, 2020  |
| FGFR inhibitors | NCT01212107 | A Phase 1 Study of LY2874455 in Participants With Advanced Cancer                                                                                                                                   | Completed | Advanced Cancer                                                                                                                                                                                                                                                                       | Drug: FGF Receptor Drug: Phosphate Binders                                                                  | Number of Participants With Treatment-Emergent Adverse Events Percentage of Participants With Best Overall Response Rate (BORR) and Objective Response Rate (ORR) Pharmacokinetics (PK): Maximum Observed Concentration (Cmax) of LY2874455 Pharmacokinetics (PK): Area Under the Concentration vs Time Curve 0 to                                                                                                                                                                                                                                                                                                                                                                                                                                                                                                                                                                                                                                                                                                                                                                                                                                                                                                                                                                                                                                                                                                                                                                                                                                                                                                                             | Phase 1         | 94  | December 2010     | June 12, 2019      |
| FGFR inhibitors | NCT00831792 | TKI258 in Castrate Resistant Prostate Cancer                                                                                                                                                        | Completed | Prostate Cancer                                                                                                                                                                                                                                                                       | Drug: TKI258                                                                                                | The Number of Participants With Improvement, Disease Progression or Stable Disease                                                                                                                                                                                                                                                                                                                                                                                                                                                                                                                                                                                                                                                                                                                                                                                                                                                                                                                                                                                                                                                                                                                                                                                                                                                                                                                                                                                                                                                                                                                                                             | Phase 2         | 46  | April 7, 2010     | September 11, 2019 |
| FGFR inhibitors | NCT01676714 | Study of Dovitinib and Biomarkers in Advanced Non-Small Cell Lung Cancer or Advanced Colorectal                                                                                                     | Completed | Non-Small Cell Lung Cancer Colorectal Cancer                                                                                                                                                                                                                                          | Drug: Dovitinib                                                                                             | Overall Response Rate Disease Control Rate Progression Free Survival Number of Patients Who Experienced Treatment Related Toxicities                                                                                                                                                                                                                                                                                                                                                                                                                                                                                                                                                                                                                                                                                                                                                                                                                                                                                                                                                                                                                                                                                                                                                                                                                                                                                                                                                                                                                                                                                                           | Phase 2         | 10  | February 2013     | January 10, 2018   |
| FGFR inhibitors | NCT02421185 | Study to Evaluate the Safety, Pharmacokinetics, and Pharmacodynamics of JNJ-42756493 (Erdafitinib) in Participants With Advanced Hepatocellular Carcinoma                                           | Completed | Carcinoma, Hepatocellular                                                                                                                                                                                                                                                             | Drug: JNJ-42756493 (erdafitinib)                                                                            | Part 1:Recommended Phase 2 Dose (RP2D) Number of participants with Objective Response Number of Participants With Adverse Events Time to Progression (TTP) Disease Control Rate (DCR) Progression-free Survival Maximum Observed Plasma Concentration of JNJ-42756493 (erdafitinib) Time of Maximum Observed Plasma Concentration of JNJ-42756493 (erdafitinib) Area Under the Curve From Time Zero to End of Dosing Interval (AUCtau) Half life of JNJ-42756493 (erdafitinib) Apparent Volume of Distribution at Steady-State of JNJ-42756493 (erdafitinib) Total Clearance of JNJ-42756493 (erdafitinib) Accumulation Index of JNJ-42756493 (erdafitinib) Duration of                                                                                                                                                                                                                                                                                                                                                                                                                                                                                                                                                                                                                                                                                                                                                                                                                                                                                                                                                                        | Phase 1 Phase 2 | 53  | May 25, 2015      | February 18, 2020  |
| FGFR inhibitors | NCT01004224 | A Dose Escalation Study in Adult Patients With Advanced Solid Malignancies                                                                                                                          | Completed | Advanced Solid Tumors With Alterations of FGFR1, 2 and or 3 Squamous Lung Cancer With FGFR1 Amplification Bladder Cancer With FGFR3 Mutation or Fusion Advanced Solid Tumors With FGFR1 Amplification Advanced Solid Tumors With FGFR2 Amplification Advanced Solid Tumors With FGFR3 | Drug: BGJ398                                                                                                | Incidence rate and category of dose-limiting toxicities will be tabulated for patients included in the dose escalation portion of the study, to establish the Maximum Tolerated Dose (MTD) and Recommended Phase 2 Dose (RPTD) To assess preliminary anti-tumor activity of BGJ398 for patients in expansion Arm 4 (previously treated patients with advanced/metastatic UCC with FGFR3 gene alterations) To determine the pharmacokinetic (PK) profiles of oral BGJ398 To evaluate the pharmacodynamic effect of                                                                                                                                                                                                                                                                                                                                                                                                                                                                                                                                                                                                                                                                                                                                                                                                                                                                                                                                                                                                                                                                                                                              | Phase 1         | 208 | December 11, 2009 | October 4, 2019    |
| FGFR inhibitors | NCT01703481 | A Study to Evaluate the Safety, Pharmacokinetics, and Pharmacodynamics of JNJ-42756493 in Adult Participants With Advanced or Refractory Solid Tumors or Lymphoma                                   | Completed | Tumor or Lymphoma                                                                                                                                                                                                                                                                     | Drug: JNJ-42756493: Part 1 Drug: JNJ-42756493: Part 2 Drug: JNJ-42756493: Part 3 Drug: JNJ-42756493: Part 4 | Part 1: Maximum Tolerated Dose (MTD) of JNJ-42756493 Maximum Observed Plasma Concentration (Cmax) of JNJ-42756493 Minimum Observed Plasma Concentration (Cmin) of JNJ-42756493 Time to Reach Maximum Observed Plasma Concentration (Tmax) of JNJ-42756493 Area Under the Curve From Time Zero to End of Dosing Interval (AUCtau) Elimination Half Life of JNJ-42756493 Apparent Volume of Distribution at Steady-State (Vss) of JNJ-42756493 Total Clearance of JNJ-42756493 Accumulation Index (AI) of JNJ-42756493 Number of Participants With Objective Tumor                                                                                                                                                                                                                                                                                                                                                                                                                                                                                                                                                                                                                                                                                                                                                                                                                                                                                                                                                                                                                                                                               | Phase 1         | 188 | June 15, 2012     | May 29, 2019       |
| FGFR inhibitors | NCT03410693 | Study of Rogaratinib (BAY1163877) vs Chemotherapy in Patients With FGFR (Fibroblast Growth Factor Receptor)-Positive Locally Advanced or Metastatic Urothelial Carcinoma                            | Completed | Carcinoma, Transitional Cell                                                                                                                                                                                                                                                          | Drug: Rogaratinib (BAY1163877) Drug: Chemotherapy                                                           | Objective response rate (ORR) Progression-free survival (PFS) Disease-control rate (DCR) Duration of response (DOR) Incidence of Adverse Events as a measure of safety and tolerability                                                                                                                                                                                                                                                                                                                                                                                                                                                                                                                                                                                                                                                                                                                                                                                                                                                                                                                                                                                                                                                                                                                                                                                                                                                                                                                                                                                                                                                        | Phase 2 Phase 3 | 172 | May 31, 2018      | November 30, 2020  |
| FGFR inhibitors | NCT02053636 | A Phase II Trial Testing Oral Administration of Lucitanib in Patients With Fibroblast Growth Factor Receptor (FGFR)1-amplified or Non-amplified Estrogen Receptor Positive Metastatic Breast Cancer | Completed | Breast Cancer                                                                                                                                                                                                                                                                         | Drug: lucitanib                                                                                             | Objective response rate (ORR)                                                                                                                                                                                                                                                                                                                                                                                                                                                                                                                                                                                                                                                                                                                                                                                                                                                                                                                                                                                                                                                                                                                                                                                                                                                                                                                                                                                                                                                                                                                                                                                                                  | Phase 2         | 76  | December 2013     | January 3, 2020    |
| FGFR inhibitors | NCT01741116 | Dovitinib(TKI258) in Patients With Castration-resistant Prostate Cancer                                                                                                                             | Completed | Hormone Refractory Prostate Cancer                                                                                                                                                                                                                                                    | Drug: TKI258                                                                                                | 16 week progression free survival rate Overall response rate                                                                                                                                                                                                                                                                                                                                                                                                                                                                                                                                                                                                                                                                                                                                                                                                                                                                                                                                                                                                                                                                                                                                                                                                                                                                                                                                                                                                                                                                                                                                                                                   | Phase 2         | 44  | November 2012     | February 18, 2021  |

|                 |             |                                                                                                                                                         |           |                                                            |                                                       |                                                                                                                                                                                                                                                                                                                                                                                                                                                                                                                                                                                                                                                                                                                                                                                                                                                                                                                                                                                                                                                                                                                                                                  |                 |     |                  |                    |
|-----------------|-------------|---------------------------------------------------------------------------------------------------------------------------------------------------------|-----------|------------------------------------------------------------|-------------------------------------------------------|------------------------------------------------------------------------------------------------------------------------------------------------------------------------------------------------------------------------------------------------------------------------------------------------------------------------------------------------------------------------------------------------------------------------------------------------------------------------------------------------------------------------------------------------------------------------------------------------------------------------------------------------------------------------------------------------------------------------------------------------------------------------------------------------------------------------------------------------------------------------------------------------------------------------------------------------------------------------------------------------------------------------------------------------------------------------------------------------------------------------------------------------------------------|-----------------|-----|------------------|--------------------|
| FGFR inhibitors | NCT02529553 | A Study of LY3076226 in Participants With Advanced or Metastatic Cancer                                                                                 | Completed | Advanced Cancer Metastatic Cancer                          | Drug: LY3076226                                       | Maximum Tolerated Dose (MTD) of LY3076226 Pharmacokinetics (PK): Maximum Concentration (Cmax) of LY3076226 PK: Area Under the Concentration-Time Curve (AUC) of LY3076226 Number of Participants With Tumor Response                                                                                                                                                                                                                                                                                                                                                                                                                                                                                                                                                                                                                                                                                                                                                                                                                                                                                                                                             | Phase 1         | 25  | September 2015   | April 17, 2020     |
| FGFR inhibitors | NCT01962532 | A Study to Evaluate the Safety, Pharmacokinetics, and Pharmacodynamics of JNJ-42756493 in Patients With Advanced or Refractory Solid Tumors or Lymphoma | Completed | Neoplasms Lymphoma Adenocarcinoma Esophagogastric Junction | Drug: Part 1: JNJ-42756493 Drug: Part 2: JNJ-42756493 | Number of participants affected by adverse events by MedDRA system organ class (SOC) and Preferred term (PT) Maximum observed plasma concentration of JNJ-42756493 Minimum observed plasma concentration of JNJ-42756493 Time correspondent to the maximum observed plasma concentration of JNJ-42756493 Area under the plasma concentration-time curve from time 0 to 24 hours of JNJ-42756493 Half-life of JNJ-42756493 Apparent volume of distribution of JNJ-42756493 Total clearance of drug of JNJ-42756493 Accumulation index of JNJ-42756493 Number of participants with complete response Number of participants with partial response Number of participants                                                                                                                                                                                                                                                                                                                                                                                                                                                                                           | Phase 1         | 19  | August 21, 2013  | May 15, 2019       |
| FGFR inhibitors | NCT01719549 | Dovitinib for Gastric Cancer With FGFR2 Amplification: GASDOVI-1                                                                                        | Completed | Gastric Cancer                                             | Drug: Dovitinib                                       | response rate Progression-free survival Number of Adverse Events Evaluation of Efficacy FGFR2 copy number                                                                                                                                                                                                                                                                                                                                                                                                                                                                                                                                                                                                                                                                                                                                                                                                                                                                                                                                                                                                                                                        | Phase 2         | 19  | September 2012   | January 7, 2020    |
| FGFR inhibitors | NCT04125693 | Roll-over Study to Continue Treatment With the Investigational Drug Rogaratinib and to Further Test                                                     | Completed | Cancer                                                     | Drug: Rogaratinib (BAY1163877) Drug: Combination drug | Incidence of treatment-emergent adverse events (TEAEs) Incidence of treatment-emergent serious adverse events (TESAEs) Incidence of drug-related TEAEs Incidence of drug-related TESAEs Frequency of dose modifications                                                                                                                                                                                                                                                                                                                                                                                                                                                                                                                                                                                                                                                                                                                                                                                                                                                                                                                                          | Phase 2         | 1   | October 30, 2019 | March 19, 2021     |
| EGFR inhibitors | NCT00101920 | ABX-EGF as Second Line Treatment of Advanced Non-Small-Cell Lung Cancer (NSCLC)                                                                         | Completed | Non-small Cell Lung Cancer Neoplasm Metastasis Lung Cancer | Drug: ABX-EGF                                         | Objective Tumor Response                                                                                                                                                                                                                                                                                                                                                                                                                                                                                                                                                                                                                                                                                                                                                                                                                                                                                                                                                                                                                                                                                                                                         | Phase 2         | 50  | June 2003        | October 15, 2010   |
| EGFR inhibitors | NCT02335944 | Study of Safety and Efficacy of EGFR-TKI EGF816 in Combination With cMET Inhibitor INC280 in Non-small Cell Lung Cancer Patients With EGFR Mutation.    | Completed | Non Small Cell Lung Cancer                                 | Drug: INC280 Drug: EGF816                             | Phase Ib: Incidence of dose limiting toxicities (DLTs) and Estimation of the Maximum tolerated dose (MTD) or Recommended Phase II dose (RP2D) Phase II Groups 1, 2 and 3: Overall Response Rate per RECIST 1.1 Phase II Group 4 Incidence and severity of AEs/SAEs, dose interruptions, reductions and dose intensity Safety of INC280 and EGF816: Incidence and severity of AEs and SAEs, including changes in hematology and chemistry values, vital signs and ECGs (Phase I/II) Frequency of dose interruption, frequency of reduction and dose intensity (Phase I/II) Overall Response Rate (Phase Ib and Phase II Group 4) Disease Control Rate (Phase I/II) Progression Free Survival (Phase I/II) Duration of Response (Phase I/II) Overall Survival (Phase I/II) Plasma concentration versus time profiles Area under the plasma concentration versus time curve (AUC) of EGF816 Area under the plasma concentration versus time curve (AUC) of INC280 Peak plasma concentration (Cmax) of INC280 Peak plasma concentration (Cmax) of EGF816 Elimination half life (t1/2) of INC280 Elimination half life (t1/2) of EGF816 Time to Response (Phase I/II) | Phase 1 Phase 2 | 177 | January 13, 2015 | October 14, 2020   |
| EGFR inhibitors | NCT00113776 | Evaluating ABX-EGF Extended Therapy in Subjects With Metastatic Colorectal Cancer                                                                       | Completed | Colorectal Cancer                                          | Drug: ABX-EGF                                         | Incidence of Adverse events Changes in Lab values Incidence of HAHA formation                                                                                                                                                                                                                                                                                                                                                                                                                                                                                                                                                                                                                                                                                                                                                                                                                                                                                                                                                                                                                                                                                    | Phase 2         |     |                  | January 21, 2011   |
| EGFR inhibitors | NCT00111774 | Evaluating ABX-EGF in Patients With Metastatic Colorectal Carcinoma                                                                                     | Completed | Colorectal Cancer Carcinoma                                | Drug: ABX-EGF                                         | To assess Objective Response at Week 8 of Cycle 1 To evaluate additional measures of the clinical efficacy of ABX-EGF in subjects with metastatic colorectal carcinoma. (progression free survival, survival time, best overall response, and time to disease progression) To determine the safety of ABX-EGF in subjects with metastatic colorectal carcinoma. (incidence of AEs, laboratory abnormalities, and other safety parameters) To evaluate the safety and efficacy of ABX-EGF in subjects with lower tumor epiderma                                                                                                                                                                                                                                                                                                                                                                                                                                                                                                                                                                                                                                   | Phase 2         | 150 | March 2002       | May 14, 2013       |
| EGFR inhibitors | NCT00061126 | ABX-EGF (a Monoclonal Antibody) Given to Patients With Prostate Cancer With or Without Tumor in                                                         | Completed | Prostate Cancer                                            | Drug: ABX-EGF                                         |                                                                                                                                                                                                                                                                                                                                                                                                                                                                                                                                                                                                                                                                                                                                                                                                                                                                                                                                                                                                                                                                                                                                                                  | Phase 2         | 50  | April 2003       | June 24, 2005      |
| EGFR inhibitors | NCT00327119 | Phase 2 Study of ABX-EGF (Panitumumab) in Japanese Subjects With M-colorectal Cancer                                                                    | Completed | Metastatic Colorectal Cancer                               | Drug: ABX-EGF (panitumumab)                           |                                                                                                                                                                                                                                                                                                                                                                                                                                                                                                                                                                                                                                                                                                                                                                                                                                                                                                                                                                                                                                                                                                                                                                  | Phase 2         | 50  | April 2006       | September 14, 2009 |
| EGFR inhibitors | NCT00425035 | Safety and Efficacy Study of ABX-EGF in Patients With Renal Cancer, Part 2                                                                              | Completed | Advanced Renal Cell Carcinoma                              | Drug: Panitumumab (ABX-EGF)                           | Part 2, Cohort 1: Efficacy: Tumor response rate (CR or PR) measured at 8 weeks Part 2, Cohort 1: Safety: Incidence and severity of AEs Part 2, Cohort 2: Time to disease progression Part 2, Cohort 1: Time to disease progression Part 2, Cohorts 1 & 2: Survival time Part 2, Cohorts 1 & 2: PFS Part 2, Cohorts 1 & 2: Best overall response rate Part 2, Cohorts 1 & 2: Tumor response rate at Weeks 15, 23, 31, and 39 Part 2, Cohorts 1 & 2: Duration of response Part 2, Cohorts 1 & 2: Percent of patients with progressive disease (measured at 8 weeks following initiation of panitumumab treatment) Part 2, Cohorts 1 & 2: Time to CR Part 2, Cohorts 1 & 2: Time to response (PR or CR)                                                                                                                                                                                                                                                                                                                                                                                                                                                             | Phase 2         | 115 | February 2003    | May 13, 2013       |
| EGFR inhibitors | NCT00113763 | Evaluating Panitumumab (ABX-EGF) Plus Best Supportive Care Versus Best Supportive Care in Patients With Metastatic Colorectal Cancer                    | Completed | Colorectal Cancer Metastases                               | Other: Best supportive care Drug: Panitumumab         | Progression-free Survival Time Overall Survival Objective Tumor Response Duration of Response Time to Response Time to Disease Progression Time to Treatment Failure Duration of Stable Disease                                                                                                                                                                                                                                                                                                                                                                                                                                                                                                                                                                                                                                                                                                                                                                                                                                                                                                                                                                  | Phase 3         | 463 | January 2004     | August 7, 2018     |

|                 |              |                                                                                                                                                                                                      |           |                                                                                                         |                                                                                      |                                                                                                                                                                                                                                                                                                                                                                                                                                                                                                                                                                                                                     |         |     |                  |                    |
|-----------------|--------------|------------------------------------------------------------------------------------------------------------------------------------------------------------------------------------------------------|-----------|---------------------------------------------------------------------------------------------------------|--------------------------------------------------------------------------------------|---------------------------------------------------------------------------------------------------------------------------------------------------------------------------------------------------------------------------------------------------------------------------------------------------------------------------------------------------------------------------------------------------------------------------------------------------------------------------------------------------------------------------------------------------------------------------------------------------------------------|---------|-----|------------------|--------------------|
| EGFR inhibitors | NCT00111761  | Evaluating Panitumumab (ABX-EGF) in Patients With Metastatic Colorectal Cancer                                                                                                                       | Completed | Colorectal Cancer                                                                                       | Drug: Panitumumab Drug: Irinotecan Biological: 5-Fluorouracil Drug: Leucovorin       | Number of Participants With Grade 3 or Grade 4 Diarrhea (Part 2) Number of Participants With Grade 3 or Grade 4 Diarrhea (Part 1) Number of Participants With an Objective Tumor Response (Part 2) Time to Disease Progression (Part 2) Progression-free Survival Time (Part 2) Survival Time (Part 2) Number of Participants Who Died (Part 2) Number of Participants With Objective Tumor Response (Part 1) Progression-free Survival Time (Part 1) Time to Disease Progression (Part 1) Survival Time (Part 1) Time to Treatment Failure                                                                         | Phase 2 | 43  | July 2002        | December 12, 2013  |
| EGFR inhibitors | NCT00089635  | Panitumumab (ABX-EGF) Monotherapy in Patients With Metastatic Colorectal Cancer                                                                                                                      | Completed | Colorectal Cancer Metastases                                                                            | Drug: Panitumumab                                                                    | Objective Tumor Response Through Week 16 Duration of Response Objective Tumor Response Throughout the Study Time to Initial Objective Response Progression-free Survival Time Time to Disease Progression Time to Treatment Failure Duration of Stable                                                                                                                                                                                                                                                                                                                                                              | Phase 2 | 203 | August 1, 2004   | October 17, 2018   |
| EGFR inhibitors | NCT00083616  | Evaluating Panitumumab (ABX-EGF) Monotherapy in Patients With Metastatic Colorectal Cancer Following Treatment With Fluoropyrimidine, Irinotecan, and                                                | Completed | Colorectal Cancer Metastatic Cancer                                                                     | Biological: Panitumumab                                                              | Number of Participants With Objective Tumor Response Through Week 16 Duration of Response Number of Participants With Objective Tumor Response Throughout Study Time to Response Progression-free Survival Time Time to Disease Progression Time to Treatment Failure Duration of Stable Disease Overall Survival                                                                                                                                                                                                                                                                                                   | Phase 2 | 185 | March 2004       | January 10, 2014   |
| EGFR inhibitors | NCT00425204  | Study for Patients Who Have Benefited and Tolerated Prior Panitumumab Treatment                                                                                                                      | Completed | Colorectal Cancer Non-Small Cell Lung Cancer Prostate Cancer Solid Tumors Advanced Renal Cell Carcinoma | Drug: Panitumumab (ABX-EGF)                                                          | To provide continued, extended panitumumab treatment to subjects who appeared to have benefited from and tolerated previous panitumumab treatment in Studies 20020374 Part 2 or 20030138 and its extension study, 20040116 To assess the safety of multidose administration of panitumumab in subjects who received continued and extended                                                                                                                                                                                                                                                                          | Phase 2 | 31  | March 2004       | September 15, 2008 |
| EGFR inhibitors | NCT00034346  | ABX-EGF in Combination With Paclitaxel and Carboplatin for the Treatment of Advanced Non-Small-Cell Lung Cancer (NSCLC)                                                                              | Completed | Non-Small Cell Lung Cancer Neoplasm Metastasis Lung Cancer                                              | Drug: ABX-EGF Drug: paclitaxel Drug: carboplatin                                     | Time to Disease Progression Best Overall Response Rate Response Rate at Week 5 Survival Time Progression Free Survival Rate of Progressive Disease at Week 11 Incidence of AEs Lab Abnormalities and other Safety Parameters PK of Panitumumab in Combination with Carboplatin and Paclitaxel Quality of Life                                                                                                                                                                                                                                                                                                       | Phase 2 | 194 | January 2002     | December 24, 2007  |
| EGFR inhibitors | NCT000588445 | Phase II Trial to Correlate Radiographic Response Induced By Gefitinib With Mutations in the Protein-Tyrosine Kinase Domain of                                                                       | Completed | Lung Cancer Non-small Cell Lung Cancer Bronchioloalveolar Cancer                                        | Drug: Gefitinib                                                                      | The Radiographic Response to Gefitinib Microarray Analysis to Identify Gene(s) or Gene Clusters That Exhibit Changes in Gene Expression; Time to Relapse and Overall Survival Data                                                                                                                                                                                                                                                                                                                                                                                                                                  | Phase 2 | 65  | June 2004        | January 22, 2016   |
| EGFR inhibitors | NCT000910676 | Study About Preventive Treatment of Folliculitis Induced by Epidermal Growth Factor Receptor Inhibitors                                                                                              | Completed | Metastatic Colorectal Cancer Non-Small-Cell Lung Carcinoma                                              | Drug: Diprosone                                                                      | To reduce by 30 % the frequency of folliculitis by a local corticotherapy beginning at the same time that the treatment by EGF-R inhibitors began To assess the frequency of grade I, II and III folliculitis under Cetuximab and under Erlotinib To list the cutaneous side effects of the EGF-R inhibitors To assess the patient quality of life with the DLQI questionnaire                                                                                                                                                                                                                                      | Phase 2 | 30  | October 2007     | July 31, 2012      |
| EGFR inhibitors | NCT00004879  | Monoclonal Antibody ABX-EGF in Treating Patients With Renal (Kidney), Prostate, Pancreatic, Non-Small Cell Lung, Colon or Rectal, Esophageal, or Gastroesophageal                                    | Completed | Colorectal Cancer Esophageal Cancer Kidney Cancer Lung Cancer Pancreatic Cancer Prostate Cancer         | Biological: panitumumab                                                              |                                                                                                                                                                                                                                                                                                                                                                                                                                                                                                                                                                                                                     | Phase 1 |     | April 2000       | January 8, 2013    |
| EGFR inhibitors | NCT000836277 | Phase II Study of Irinotecan and Panitumumab                                                                                                                                                         | Completed | Esophageal Cancer                                                                                       | Drug: Panitumumab Drug: Irinotecan                                                   | Response Rate (RR) Clinical Benefit Rate (CBR) Progression-free Survival (PFS) Overall Survival (OS) 1-year (Overall) Survival Rate                                                                                                                                                                                                                                                                                                                                                                                                                                                                                 | Phase 2 | 24  | May 2009         | November 15, 2016  |
| EGFR inhibitors | NCT002113813 | A Dose Escalation Study of ASP8273 in Subjects With Non-Small-Cell Lung Cancer (NSCLC) Who Have Epidermal Growth Factor Receptor (EGFR) Mutations                                                    | Completed | Non-Small-Cell Lung Cancer (NSCLC) Epidermal Growth Factor Receptor Mutations                           | Drug: naquotinib Drug: midazolam                                                     | Safety and tolerability as assessed by Dose Limiting Toxicities (DLTs) Safety and tolerability as assessed by adverse events (AEs) Safety and tolerability as assessed by laboratory tests Safety and tolerability as assessed by vital signs Safety and tolerability as assessed by 12-lead electrocardiograms (ECGs) Composite of pharmacokinetics of ASP8273 concentration and its metabolites (plasma): Cmax, tmax, AUClast, AUCinf, t1/2, CL/F, and Vz/F Composite of pharmacokinetics of midazolam concentration and its metabolites (plasma): Cmax, tmax, AUClast, AUCinf, t1/2, CL/F, and Vz/F Best overall | Phase 1 | 133 | April 2014       | January 18, 2020   |
| EGFR inhibitors | NCT001221077 | Study of Erlotinib (Tarceva®) in Combination With OSI-906 in Patients With Advanced Non-small Cell Lung Cancer (NSCLC) With Activating Mutations of the Epidermal Growth Factor Receptor (EGFR) Gene | Completed | NSCLC Non Small Cell Lung Cancer                                                                        | Drug: OSI-906 Drug: Erlotinib Drug: Placebo                                          | Progression-free survival of OSI-906 in combination with Erlotinib or Erlotinib plus placebo Overall Survival (OS) Disease Control Rate (DCR) Best Overall Response Rate Duration of Response (CR/PR) Safety assessed through evaluation of adverse events, laboratory, physical examination, and Electrocardiogram (ECG) data                                                                                                                                                                                                                                                                                      | Phase 2 | 88  | April 2011       | January 24, 2019   |
| EGFR inhibitors | NCT002740894 | Can Epidermal Growth Factor Receptor Improve the Postoperative Survivorship for Inoperable Non-small Cell Lung Cancer With Spinal                                                                    | Completed | Is Targeted Therapy Increasing Survival Inoperable Nonsmall Cell Lung Cancer With Spinal Metastasis ?   | Drug: Gefitinib                                                                      | Survival and neurologic outcome of 60 participants receiving targeted therapy for nonsmall cell lung cancer with spinal metastasis. Neurological outcome by Frankel grading and ambulation status.                                                                                                                                                                                                                                                                                                                                                                                                                  |         | 100 | February 2016    | April 15, 2016     |
| EGFR inhibitors | NCT004640870 | The Molecular Epidemiology of Epidermal Growth Factor Receptor (EGFR) Mutations in Patients With Advanced EGFR Mutation-positive Non-small Cell Lung Cancer Treated                                  | Completed | Non Small Cell Lung Cancer EGF-R Positive Non-Small Cell Lung Cancer EGFR Gene Mutation                 | Drug: Afatinib                                                                       | Progression Free Survival Overall survival Second progression-free survival (PFS2) Assessment of the safety profile of Afatinib                                                                                                                                                                                                                                                                                                                                                                                                                                                                                     |         | 59  | March 15, 2015   | December 23, 2020  |
| EGFR inhibitors | NCT000940316 | Dual Epidermal Growth Factor Receptor Inhibition With Erlotinib and Panitumumab With or Without Chemotherapy for Advanced                                                                            | Completed | Colorectal Cancer                                                                                       | Biological: panitumumab Drug: erlotinib hydrochloride Drug: irinotecan hydrochloride | Tumor Response Rate Based on Complete Response (CR)+ Partial Response (PR) + Stable Disease (SD) Time to Disease Progression Time to Treatment Failure Toxicity of the Combination of Study Drugs Effect on Downstream Targets of Epidermal Growth Factor Receptor (EGFR) in Skin Rash Associated With Pharmacologic EGFR Inhibition                                                                                                                                                                                                                                                                                | Phase 2 | 28  | January 18, 2010 | May 7, 2019        |

|                 |             |                                                                                                                                                                                                                                                                           |           |                                                                                                                                                                          |                                                                                                                         |                                                                                                                                                                                                                                                                                                                                                                                                                                                                                                                                                                                        |                 |     |                   |                   |
|-----------------|-------------|---------------------------------------------------------------------------------------------------------------------------------------------------------------------------------------------------------------------------------------------------------------------------|-----------|--------------------------------------------------------------------------------------------------------------------------------------------------------------------------|-------------------------------------------------------------------------------------------------------------------------|----------------------------------------------------------------------------------------------------------------------------------------------------------------------------------------------------------------------------------------------------------------------------------------------------------------------------------------------------------------------------------------------------------------------------------------------------------------------------------------------------------------------------------------------------------------------------------------|-----------------|-----|-------------------|-------------------|
| EGFR inhibitors | NCT02060253 | Ganetespi, Paclitaxel, Trastuzumab and Pertuzumab for Metastatic Human Epidermal Growth Factor Receptor 2 Positive Breast Cancer                                                                                                                                          | Completed | HER2-positive Breast Cancer Male Breast Cancer Recurrent Breast Cancer Stage IIIA Breast Cancer Stage IIIB Breast Cancer Stage IIIC Breast Cancer Stage IV Breast Cancer | Drug: ganetespi Drug: paclitaxel Biological: trastuzumab Biological: pertuzumab                                         | Maximum tolerated dose (MTD) and recommended Phase II dose of ganetespi plus paclitaxel plus trastuzumab and pertuzumab Objective Response Rate Clinical benefit rate Duration of response Progression-free survival (PFS)                                                                                                                                                                                                                                                                                                                                                             | Phase 1         | 9   | April 2014        | June 14, 2018     |
| EGFR inhibitors | NCT01432886 | A Study of Eribulin Mesylate With Trastuzumab for Advanced or Recurrent Human Epidermal Growth Factor Receptor 2-Positive (HER2+)                                                                                                                                         | Completed | Breast Cancer                                                                                                                                                            | Drug: E7389                                                                                                             | Number of Participants With Dose Limiting Toxicity (DLT) Number of Participants With Adverse Events                                                                                                                                                                                                                                                                                                                                                                                                                                                                                    | Phase 1         | 12  | October 2011      | October 7, 2016   |
| EGFR inhibitors | NCT01736410 | A Phase 2 Study of Trastuzumab in Combination With TS-ONE and Cisplatin in Firstline Human Epidermal Growth Factor Receptor 2 (HER2)-Positive Advanced Gastric                                                                                                            | Completed | HER 2 Positive Advanced Gastric Cancer                                                                                                                                   | Drug: Trastuzumab, TS ONE, Cisplatin                                                                                    | Overall Response Rate (ORR) Progression free survival (PFS) Overall survival (OS) Time to Treatment Failure (TTF)                                                                                                                                                                                                                                                                                                                                                                                                                                                                      | Phase 2         | 30  | May 2010          | June 17, 2013     |
| EGFR inhibitors | NCT01573702 | Stereotactic Radiosurgery or Other Local Ablation Then Erlotinib in Epidermal Growth Factor Receptor                                                                                                                                                                      | Completed | Non Small Cell Lung Cancer                                                                                                                                               | Procedure: Stereotactic Radiosurgery Drug: Erlotinib                                                                    | Percentage of Participants With Progression Free Survival Percentage of Participants With Local Control of Sites on Erlotinib Following Stereotactic Radiosurgery (SRS) Median Overall Survival Toxicity Rate From Stereotactic Radiosurgery (SRS) Toxicity Rate                                                                                                                                                                                                                                                                                                                       | Phase 2         | 32  | December 11, 2012 | January 12, 2021  |
| EGFR inhibitors | NCT00589706 | A Phase II Study of Adjuvant Use of Anti-Epidermal Growth Factor Receptor EGFR-425 in High Grade                                                                                                                                                                          | Completed | Gliomas                                                                                                                                                                  | Drug: MAb-425                                                                                                           | Survival                                                                                                                                                                                                                                                                                                                                                                                                                                                                                                                                                                               | Phase 2         | 11  | January 1985      | May 9, 2017       |
| EGFR inhibitors | NCT00903734 | An Umbrella, Modular Study Based on Epidermal Growth Factor Receptor (EGFR) Mutation Status                                                                                                                                                                               | Completed | Advanced Cancers                                                                                                                                                         | Drug: Erlotinib Hydrochloride (Tarceva)                                                                                 | Maximum Tolerated Dose (MTD) and toxicity profiles via a brief initial "run-in"/dose escalation.                                                                                                                                                                                                                                                                                                                                                                                                                                                                                       | Phase 1         | 16  | April 2009        | July 13, 2015     |
| EGFR inhibitors | NCT01004731 | Study of Anti-Epidermal Growth Factor Receptor (EGFR) Antibody, Cetuximab, in Combination With Gemcitabine/Carboplatin in Patients With Stage IV Lung Cancer                                                                                                              | Completed | Stage IV Non-small Cell Lung Cancer                                                                                                                                      | Drug: Cetuximab in combination with Carboplatin/Gemcitabine                                                             | Evaluate the tumor response of cetuximab in combination with gemcitabine and carboplatin in patients with EGFR positive, chemotherapy-naive, Stage IV non-small cell lung cancer. Evaluate the response rate and time to disease progression                                                                                                                                                                                                                                                                                                                                           | Phase 1 Phase 2 | 7   | June 2001         | June 28, 2010     |
| EGFR inhibitors | NCT00284180 | Vinflunine Plus Trastuzumab in Human Epidermal Growth Factor Receptor 2 (HER2neu) Over-Expressing Metastatic Breast Cancer                                                                                                                                                | Completed | Breast Neoplasms Breast Cancer                                                                                                                                           | Drug: Vinflunine Drug: Trastuzumab                                                                                      | Overall Response Rate (ORR), the Percentage of Patients Who Experience an Objective Benefit From Treatment                                                                                                                                                                                                                                                                                                                                                                                                                                                                             | Phase 2         | 32  | January 2006      | August 9, 2013    |
| EGFR inhibitors | NCT01260181 | A Study of Erlotinib in Participants With Locally Advanced or Metastatic Non-Small Cell Lung Cancer With Epidermal Growth Factor Receptor Mutations                                                                                                                       | Completed | Non-Squamous Non-Small Cell Lung Cancer                                                                                                                                  | Drug: Erlotinib                                                                                                         | Percentage of Participants With Objective Response (Complete Response [CR]/Partial Response [PR]) Based on Computer Tomography (CT) or Magnetic Resonance Imaging (MRI) According to Response Evaluation Criteria in Solid Tumors (RECIST) Version (v) 1.1 Progression Free Survival (PFS) Based on CT or MRI According to RECIST v 1.1 Overall Survival Percentage of Participants With Adverse Events Percentage of Participants With Epidermal Growth Factor Receptor (EGFR) Mutation in Study Population Median Time Taken From the First Response Until Disease Progression Based | Phase 2         | 30  | March 31, 2011    | October 31, 2018  |
| EGFR inhibitors | NCT01372384 | A Study of Tarceva (Erlotinib) in Patients With Locally Advanced, Metastatic or Recurrent Non-Small Cell Cancer Who Present Epidermal Growth Factor Receptor Mutations                                                                                                    | Completed | Non-Squamous Non-Small Cell Lung Cancer                                                                                                                                  | Drug: erlotinib [Tarceva]                                                                                               | Progression-free Survival (Tumour Assessments According to RECIST Criteria) Objective Response Rate (Investigator Assessed) Safety: Incidence of Adverse Events Overall Survival                                                                                                                                                                                                                                                                                                                                                                                                       | Phase 2         | 6   | January 2012      | February 2, 2016  |
| EGFR inhibitors | NCT00344773 | First-line Treatment for Adenocarcinoma Patients With Epidermal Growth Factor Receptor                                                                                                                                                                                    | Completed | Pulmonary Cancer                                                                                                                                                         | Drug: Gefitinib                                                                                                         | Percentage of Participants Who Had an Objective Response Rate(ORR) Based on Response Evaluation Criteria In Solid Tumors (RECIST) Criteria. Progression Free Survival (PFS) Overall Survival (OS) Safety Profile: Participants With Adverse Events                                                                                                                                                                                                                                                                                                                                     | Phase 2         | 46  | March 2006        | June 29, 2010     |
| EGFR inhibitors | NCT00079066 | Cetuximab + Best Supportive Care Compared With Best Supportive Care Alone in Metastatic Epidermal Growth Factor Receptor-Positive Colorectal Cancer                                                                                                                       | Completed | Colorectal Cancer Quality of Life                                                                                                                                        | Biological: cetuximab Procedure: quality-of-life assessment                                                             | Overall survival Time to progression Objective response rate Quality of life by European Organization for Research of the Treatment of Cancer Quality of Life Questionnaire -C30 (EORTC QLQ-C30) Health utilities by Health Utilities Index 13 (HU 13) Economic evaluation Safety profile                                                                                                                                                                                                                                                                                              | Phase 3         | 572 | August 28, 2003   | April 6, 2020     |
| EGFR inhibitors | NCT00875979 | A Study of Trastuzumab Emtansine (Trastuzumab-MCC-DM1, T-DM1) in Combination With Pertuzumab Administered to Patients With Human Epidermal Growth Factor Receptor-2 (HER2)-Positive Locally Advanced or Metastatic Breast Cancer Who Have Previously Received Trastuzumab | Completed | Metastatic Breast Cancer                                                                                                                                                 | Drug: Trastuzumab emtansine [Kadcyla] 3.0 mg/kg Drug: Trastuzumab emtansine [Kadcyla] 3.6 mg/kg Drug: Pertuzumab 420 mg | Objective Response Assessed by the Investigator Using Response Evaluation Criteria in Solid Tumors (RECIST) Duration of Objective Response Assessed by the Investigator Using Response Evaluation Criteria in Solid Tumors (RECIST) Progression-free Survival Assessed by the Investigator Using Response Evaluation Criteria in Solid Tumors (RECIST)                                                                                                                                                                                                                                 | Phase 1 Phase 2 | 67  | May 2009          | December 24, 2013 |
| EGFR inhibitors | NCT00477880 | Cetuximab in Treating Patients With M é n é trier Disease at High Risk of Developing Stomach Cancer                                                                                                                                                                       | Completed | Gastric Cancer Precancerous Condition                                                                                                                                    | Biological: Cetuximab                                                                                                   | Response                                                                                                                                                                                                                                                                                                                                                                                                                                                                                                                                                                               | Phase 1         | 9   | April 2001        | January 10, 2017  |

|                 |             |                                                                                                                                                                 |           |                                                                                                                                                                                                                                                                                                                                                                                                      |                                                                                                                                                 |                                                                                                                                                                                                                                                                                                                                                                                                                                                                                                                                                                                                                                                                                                                                                                        |                 |     |                    |                   |
|-----------------|-------------|-----------------------------------------------------------------------------------------------------------------------------------------------------------------|-----------|------------------------------------------------------------------------------------------------------------------------------------------------------------------------------------------------------------------------------------------------------------------------------------------------------------------------------------------------------------------------------------------------------|-------------------------------------------------------------------------------------------------------------------------------------------------|------------------------------------------------------------------------------------------------------------------------------------------------------------------------------------------------------------------------------------------------------------------------------------------------------------------------------------------------------------------------------------------------------------------------------------------------------------------------------------------------------------------------------------------------------------------------------------------------------------------------------------------------------------------------------------------------------------------------------------------------------------------------|-----------------|-----|--------------------|-------------------|
| EGFR inhibitors | NCT00798655 | Trial of Postoperative Radiation, Cisplatin, and Panitumumab in Locally Advanced Head and Neck Cancer                                                           | Completed | Cancer of Head Cancer of Head and Neck Cancer of Neck Cancer of the Head Cancer of the Head and Neck Cancer of the Neck Head and Neck Cancer Head Cancer Head Neoplasms Head, Neck Neoplasms Neck Cancer Neck Neoplasms Neoplasms, Head Neoplasms, Head and Neck Neoplasms, Neck Neoplasms, Upper Aerodigestive Tract UADT Neoplasms Upper                                                           | Drug: Panitumumab Drug: Cisplatin Radiation: Radiation Therapy                                                                                  | Probability of Progression-free Survival (PFS) at 2 Years Probability of 2-year Overall Survival                                                                                                                                                                                                                                                                                                                                                                                                                                                                                                                                                                                                                                                                       | Phase 2         | 46  | November 2007      | October 3, 2017   |
| EGFR inhibitors | NCT00094835 | Study to Evaluate Motesanib With or Without Carboplatin/Paclitaxel or Panitumumab in the Treatment of Patients With Advanced Non-Small Cell Lung Cancer (NSCLC) | Completed | Lung Cancer Non-Small Cell Lung Cancer                                                                                                                                                                                                                                                                                                                                                               | Biological: Panitumumab Drug: Motesanib diphosphate Drug: Paclitaxel Drug: Carboplatin                                                          | Time to Maximum Plasma Concentration of Motesanib (Tmax) for Cycle 1 Maximum Observed Plasma Concentration of Motesanib (Cmax) in Cycle 1 Estimated Terminal-phase Half-life (t1/2,z) of Motesanib in Cycle 1 Area Under the Plasma Concentration-time Curve for Motesanib in Cycle 1 Trough Plasma Concentration at 24 Hours Post-dose (C24) for Motesanib in Cycle 1 Time to Maximum Plasma Concentration of Motesanib (Tmax) in Cycle 2 Maximum Observed Plasma Concentration of Motesanib (Cmax) in Cycle 2 Estimated Terminal-phase Half-life (t1/2,z) of Motesanib in Cycle 2 Area Under the Plasma Concentration-time Curve From Time 0 to 24 Hours Post-dose for Motesanib in Cycle 2 Trough Plasma Concentration at 24 Hours Post-dose (C24) for Motesanib in | Phase 1 Phase 2 | 51  | January 2005       | March 24, 2016    |
| EGFR inhibitors | NCT00754494 | Erlotinib Hydrochloride in Treating Patients With Stage I-III Colorectal Cancer or Adenoma                                                                      | Completed | Adenomatous Polyp Recurrent Colon Cancer Recurrent Rectal Cancer Stage I Colon Cancer Stage I Rectal Cancer Stage IIA Colon Cancer Stage IIA Rectal Cancer Stage IIB Colon Cancer Stage IIB Rectal Cancer Stage IIC Colon Cancer Stage IIC Rectal Cancer Stage IIIA Colon Cancer Stage IIIA Rectal Cancer Stage IIIB Colon Cancer Stage IIIB Rectal Cancer Stage IIIC Colon Cancer Stage IIIC Rectal | Drug: erlotinib hydrochloride Other: placebo Other: laboratory biomarker analysis                                                               | Change in ACF pERK Levels Change in EGF-inducible Markers - pEGFR in Normal Mucosa Change in EGF-inducible Markers - Total EGFR in Normal Mucosa Change in EGF-inducible Markers - pEGFR in ACF Change in EGF-inducible Markers - Total EGFR in ACF ACF: Normal Mucosa pERK Ratio Plasma Erlotinib Concentration (ng/mL) Plasma OSI-420 Concentration (ng/mL) Normal Mucosa Erlotinib Concentration (ng/mg) Normal Mucosa OSI-420 Concentration (ng/mg) Number of Participants Reported at Least 1 Side Effect During the Study Number of Participants Reported at Least 1 Rash Side Effect During the Study Number of Participants Reported at Least 1 Diarrhea Side Effect During                                                                                    | Phase 2         | 45  | July 2008          | January 6, 2015   |
| EGFR inhibitors | NCT00039273 | Monoclonal Antibody Therapy in Treating Patients With Metastatic Colorectal Cancer                                                                              | Completed | Colorectal Cancer                                                                                                                                                                                                                                                                                                                                                                                    | Biological: panitumumab                                                                                                                         |                                                                                                                                                                                                                                                                                                                                                                                                                                                                                                                                                                                                                                                                                                                                                                        | Phase 2         | 44  | July 2002          | January 8, 2013   |
| EGFR inhibitors | NCT00054574 | Monoclonal Antibody Therapy in Treating Patients With Prostate                                                                                                  | Completed | Prostate Cancer                                                                                                                                                                                                                                                                                                                                                                                      | Biological: panitumumab                                                                                                                         |                                                                                                                                                                                                                                                                                                                                                                                                                                                                                                                                                                                                                                                                                                                                                                        | Phase 2         |     | November 2002      | August 3, 2020    |
| EGFR inhibitors | NCT00542308 | Zalutumumab in Non-curable Patients With SCCHN                                                                                                                  | Completed | Head and Neck Cancer Squamous Cell Cancer                                                                                                                                                                                                                                                                                                                                                            | Drug: Zalutumumab                                                                                                                               | Overall Survival Tumour Response                                                                                                                                                                                                                                                                                                                                                                                                                                                                                                                                                                                                                                                                                                                                       | Phase 2         | 90  | January 2008       | August 27, 2014   |
| EGFR inhibitors | NCT00390455 | Fulvestrant With or Without Lapatinib in Treating Postmenopausal Women With Stage III or Stage IV Breast Cancer That is Hormone Receptor-Positive               | Completed | Estrogen Receptor Positive HER2 Positive Breast Carcinoma HER2/Neu Negative Progesterone Receptor Positive Recurrent Breast Carcinoma Stage IIIB Breast Cancer AJCC v7 Stage IIC Breast Cancer AJCC v7 Stage IV Breast Cancer AJCC v6 and v7                                                                                                                                                         | Drug: Fulvestrant Other: Laboratory Biomarker Analysis Drug: Lapatinib Ditosylate Other: Placebo Administration                                 | Progression-free Survival (PFS) Objective Tumor Response Rate Overall Survival (OS)                                                                                                                                                                                                                                                                                                                                                                                                                                                                                                                                                                                                                                                                                    | Phase 3         | 295 | September 15, 2006 | December 20, 2019 |
| EGFR inhibitors | NCT03853551 | Osimertinib Study in Indian Patients                                                                                                                            | Completed | Non Small Cell Lung Cancer (NSCLC)                                                                                                                                                                                                                                                                                                                                                                   | Drug: Osimertinib                                                                                                                               | To assess the safety of osimertinib                                                                                                                                                                                                                                                                                                                                                                                                                                                                                                                                                                                                                                                                                                                                    | Phase 4         | 60  | April 18, 2019     | August 27, 2020   |
| EGFR inhibitors | NCT00867334 | New Individualized Therapy Trial for Metastatic Colorectal Cancer                                                                                               | Completed | Colorectal Neoplasm Colorectal Cancer                                                                                                                                                                                                                                                                                                                                                                | Drug: Imatinib mesylate and panitumumab Drug: Standard-of-care                                                                                  | Number of Patients With Adverse Events Number of Participants With Stabilization or Reduction in Tumor Size                                                                                                                                                                                                                                                                                                                                                                                                                                                                                                                                                                                                                                                            | Phase 1 Phase   | 10  | June 2009          | June 30, 2020     |
| EGFR inhibitors | NCT00191451 | A Study of Gemcitabine and Carboplatin (Plus Herceptin in Human Epidermal Growth Factor Receptor 2 Positive [HER2+] Patients) With Metastatic Breast            | Completed | Breast Cancer                                                                                                                                                                                                                                                                                                                                                                                        | Drug: Gemcitabine Drug: Carboplatin Drug: Herceptin                                                                                             | Overall Tumor Response Duration of Response Number of Patients Who Experienced Alopecia Time to Disease Progression (TTP) Percentage of Patients With Overall Survival at 1 Year and 2 Years                                                                                                                                                                                                                                                                                                                                                                                                                                                                                                                                                                           | Phase 2         | 150 | April 2004         | November 20, 2009 |
| EGFR inhibitors | NCT00863480 | Individualized Treatment Based on Epidermal Growth Factor Receptor Mutations and Level of BRCA1 Expression in Advanced                                          | Completed | Non-small Cell Lung Cancer                                                                                                                                                                                                                                                                                                                                                                           | Drug: Docetaxel Drug: Docetaxel-Cisplatin Drug: Gemcitabine-Cisplatin Drug: Erlotinib                                                           | Tumoral Response (RECIST criteria) Overall Survival                                                                                                                                                                                                                                                                                                                                                                                                                                                                                                                                                                                                                                                                                                                    | Not Applicable  | 153 | June 2005          | March 19, 2021    |
| EGFR inhibitors | NCT00042939 | Irinotecan and Docetaxel With or Without Cetuximab in Treating Patients With Metastatic Pancreatic                                                              | Completed | Pancreatic Cancer                                                                                                                                                                                                                                                                                                                                                                                    | Biological: cetuximab Drug: docetaxel Drug: irinotecan hydrochloride                                                                            | Proportion of Patients With Objective Response Evaluated by RECIST (Solid Tumor Response Criteria) Progression-free Survival Overall Survival Epidermal Growth Factor Receptor (EGFR) Status Proportion of Patients With Thromboembolic Events                                                                                                                                                                                                                                                                                                                                                                                                                                                                                                                         | Phase 2         | 94  | July 2003          | April 9, 2013     |
| EGFR inhibitors | NCT00567359 | Erlotinib in Patients With Resected, Early Stage NSCLC With Confirmed Mutations in the EGFR                                                                     | Completed | Non-small Cell Lung Cancer                                                                                                                                                                                                                                                                                                                                                                           | Drug: Erlotinib                                                                                                                                 | 2-year Disease-free Survival Number of Participants With Treat Related Serious Adverse Events Median Overall Survival Median Disease Free Survival                                                                                                                                                                                                                                                                                                                                                                                                                                                                                                                                                                                                                     | Phase 2         | 100 | December 2007      | December 11, 2018 |
| EGFR inhibitors | NCT01454596 | CAR T Cell Receptor Immunotherapy Targeting EGFRvIII for Patients With Malignant Gliomas Expressing EGFRvIII                                                    | Completed | Malignant Glioma Glioma Glioblastoma Brain Cancer Gliosarcoma                                                                                                                                                                                                                                                                                                                                        | Biological: Epidermal growth factor receptor(EGFRv)III Chimeric antigen receptor (CAR) transduced PBL Drug: Aldesieukin Drug: Fludarabine Drug: | Number of Treatment Related Adverse Events Progression Free Survival Number of Patients With an Objective Response Circulating Chimeric Antigen Receptor (CAR+) Cells in Peripheral Blood at 1 Month Post Treatment Number of Participants With Serious and Non-serious Adverse Events Assessed by the Common Terminology Criteria in Adverse                                                                                                                                                                                                                                                                                                                                                                                                                          | Phase 1 Phase 2 | 18  | May 16, 2012       | August 21, 2019   |
| EGFR inhibitors | NCT02731313 | Human Epidermal Growth Factor Receptor 2 (HER-2) Status in Gastric and Gastro-Esophageal Junction (GEJ) Carcinoma                                               | Completed | Gastric Cancer, Gastroesophageal Junction Cancer                                                                                                                                                                                                                                                                                                                                                     | Biological: Trastuzumab                                                                                                                         | Simple Kappa Coefficient of Human Epidermal Growth Factor Receptor 2 (HER-2) Status Between Local and Centralized Laboratory Assessments Cancer Characteristics: Percentage of Participants With Initial Location of Adenocarcinoma in Stomach Versus Eso gastric Location Cancer Characteristics: Percentage of Participants With Samples in Each of the Histologic Type Lauren's Classifications, Including Diffuse Type, Intestinal and Mixed Cancer Characteristics: Percentage of Participants With Samples in Each of the Tumor-Node-Metastasis (TNM) Stages Weighted Kappa Coefficient Between Immunohistochemistry (IHC) 4B5 and Silver in Situ Hybridization (SISH) Techniques for                                                                            |                 | 420 | July 2012          | October 28, 2016  |



|                 |             |                                                                                                                                                     |           |                                                            |                                                                                   |                                                                                                                                                                                                                                                                                                                                                                                                                                                                                                                                                                                                                                                                                                                                                                                                                                                                                                                                                                                                                                                                                                                                                                                                                                                                                                                                                                                                                                                                                                                                                                                                                                                                                                                 |                 |     |                   |                   |
|-----------------|-------------|-----------------------------------------------------------------------------------------------------------------------------------------------------|-----------|------------------------------------------------------------|-----------------------------------------------------------------------------------|-----------------------------------------------------------------------------------------------------------------------------------------------------------------------------------------------------------------------------------------------------------------------------------------------------------------------------------------------------------------------------------------------------------------------------------------------------------------------------------------------------------------------------------------------------------------------------------------------------------------------------------------------------------------------------------------------------------------------------------------------------------------------------------------------------------------------------------------------------------------------------------------------------------------------------------------------------------------------------------------------------------------------------------------------------------------------------------------------------------------------------------------------------------------------------------------------------------------------------------------------------------------------------------------------------------------------------------------------------------------------------------------------------------------------------------------------------------------------------------------------------------------------------------------------------------------------------------------------------------------------------------------------------------------------------------------------------------------|-----------------|-----|-------------------|-------------------|
| EGFR inhibitors | NCT02228369 | Oral Epidermal Growth Factor Receptor Tyrosine Kinase Inhibitors, AZD3759 or AZD9291, in Patients Who Have Advanced Non-Small Cell Lung Cancer      | Completed | EGFR Mutation Positive Advanced Non Small Cell Lung Cancer | Drug: AZD3759 Drug: AZD9291                                                       | Safety and Tolerability (The number of patients with each AE by system organ class, preferred term and CTCAE grade) Plasma concentration of AZD3759 and metabolite and pharmacokinetics parameters after single dose of AZD3759(Cmax, tmax, terminal rate constant, half life, AUC, clearance, volume of distribution, mean residence time) Plasma,urine,cerebrospinal fluid concentration of AZD3759 and metabolite and pharmacokinetics parameters after multiple dosing(Cmax,ss, tmax,ss, Cmin,ss, AUCss, CLss/F) Plasma,urine, cerebrospinal fluid concentration of AZD3759 and metabolite and pharmacokinetics parameters after multiple dosing (extent of accumulation, renal clearance, time dependency of pharmacokinetics and amount of drug excreted) Plasma, cerebrospinal fluid concentration of AZD9291 and metabolite and pharmacokinetics parameters after multiple dose of AZD9291(Cmax,ss, tmax,ss, Cmin,ss, AUCss, CLss/F) Plasma, cerebrospinal fluid concentration of AZD9291 and metabolites and pharmacokinetics parameters after multiple dosing (extent of accumulation, renal clearance, time dependency of pharmacokinetics and amount of drug excreted) Overall survival follow up for all expansion patients 4b-hydroxy cholesterol in Part B patients with BM The effect of food on the pharmacokinetics of a single dose of AZD3759 in plasma Cerebrospinal fluid response rate for patients with LM and/or BM Changes from baseline in central nervous system symptoms (analyzed from QLQ-BN20) in patients with LM treated with AZD3759 /AZD9291 Changes from baseline in neurological exam in patients with LM treated with AZD3759 /AZD9291 Measurement of Objective Response | Phase 1         | 108 | November 5, 2014  | January 5, 2021   |
| EGFR inhibitors | NCT00034541 | Study of Cetuximab in Combination With Carboplatin-Paclitaxel in Non-Small Cell Lung Cancer                                                         | Completed | Carcinoma, Non-Small-Cell Lung                             | Biological: cetuximab Drug: paclitaxel Drug: carboplatin                          | Assess the safety profile of cetuximab when used in combination with paclitaxel and carboplatin Antitumor activity Effect of cetuximab on the pharmacokinetics of paclitaxel and carboplatin                                                                                                                                                                                                                                                                                                                                                                                                                                                                                                                                                                                                                                                                                                                                                                                                                                                                                                                                                                                                                                                                                                                                                                                                                                                                                                                                                                                                                                                                                                                    | Phase 1 Phase 2 | 32  | December 2000     | April 9, 2010     |
| EGFR inhibitors | NCT01999985 | Phase I Trial of Afatinib (BIBW 2992) and Dasatinib in Non-small Cell Lung Cancer (NSCLC)                                                           | Completed | Lung Cancer Non-small Cell Lung Cancer (NSCLC)             | Drug: Dasatinib - 1A Drug: Afatinib - 1A Drug: Dasatinib - 1B Drug: Afatinib - 1B | Maximum Tolerated Dose (MTD) of Afatinib (BIBW 2992) in Combination With Dasatinib Number of Participants With Objective Response Median Progression Free Survival                                                                                                                                                                                                                                                                                                                                                                                                                                                                                                                                                                                                                                                                                                                                                                                                                                                                                                                                                                                                                                                                                                                                                                                                                                                                                                                                                                                                                                                                                                                                              | Phase 1         | 25  | December 31, 2013 | November 27, 2020 |
| EGFR inhibitors | NCT02208843 | Afatinib as Second-line Therapy for Lung Cancer With Epidermal Growth Factor Receptor (EGFR) Mutation                                               | Completed | Carcinoma, Non-Small-Cell Lung                             | Drug: Afatinib                                                                    | Objective Tumour Response (Complete Response [CR], Partial Response [PR]) as Assessed by the Investigator According to the RECIST Version 1.1 Progression-free Survival (PFS) as Assessed by the Investigator According to RECIST 1.1. Disease Control (CR, PR, Stable Disease [SD]) as Assessed by the Investigator According to RECIST 1.1                                                                                                                                                                                                                                                                                                                                                                                                                                                                                                                                                                                                                                                                                                                                                                                                                                                                                                                                                                                                                                                                                                                                                                                                                                                                                                                                                                    | Phase 4         | 60  | October 2, 2014   | December 17, 2018 |
| EGFR inhibitors | NCT03599518 | DS-1205c With Gefitinib for Metastatic or Unresectable Epidermal Growth Factor Receptor (EGFR)-Mutant Non-Small Cell Lung Cancer                    | Completed | Non Small Cell Lung Cancer                                 | Drug: DS-1205c Drug: Gefitinib                                                    | Number of participants with dose-limiting toxicities during the Dose Escalation period Number of participants with adverse events (AEs) Plasma concentration of DS-1205a versus time Maximum observed analyte concentration (Cmax) Actual sampling time to reach Cmax (Tmax) Area under the analyte concentration versus time curve during a dosing interval (AUCtau) Minimum observed analyte concentration prior to the beginning, or at the end, of a dosing interval (Ctrough) Cmax during a dosing interval (Tau) at steady state (Cmax,ss) Tmax Ctrough AUCtau Objective response rate (ORR), graded according to RECIST version 1.1 Change from baseline in size of target lesion(s) Duration of                                                                                                                                                                                                                                                                                                                                                                                                                                                                                                                                                                                                                                                                                                                                                                                                                                                                                                                                                                                                         | Phase 1         | 21  | October 9, 2018   | July 7, 2020      |
| EGFR inhibitors | NCT02044380 | Afatinib in Patients With Non Small Cell Lung Cancer (NSCLC) With Epidermal Growth Factor Receptor (EGFR) Mutations                                 | Completed | Carcinoma, Non-Small-Cell Lung                             | Drug: Afatinib                                                                    | Safety Assessment                                                                                                                                                                                                                                                                                                                                                                                                                                                                                                                                                                                                                                                                                                                                                                                                                                                                                                                                                                                                                                                                                                                                                                                                                                                                                                                                                                                                                                                                                                                                                                                                                                                                                               | Phase 3         | 14  | March 2014        | March 31, 2017    |
| EGFR inhibitors | NCT00444015 | Phase I Dasatinib/Erlotinib in Recurrent Non-small Cell Lung Cancer (NSCLC)                                                                         | Completed | Non-Small-Cell Lung Carcinoma                              | Drug: Erlotinib in combination with Dasatinib                                     | Number of Serious Adverse Events (SAEs) Reported Determine Maximum Tolerated Dose (MTD) Pharmacokinetics (PK) Changes in Serum Vascular Endothelial Growth Factor (VEGF) and Interleukin(IL)-8 Pre-treatment and Post-treatment Number of Participants With Complete Response (CR) and Partial Response (PR) Number of Best Overall Response (BOR) Assessed by the Investigator Using Response Evaluation Criteria in Solid Tumors (RECIST) 1.1. Progression-Free Survival (PFS) Overall Survival (OS) Percentage of Participants With Adverse Events (AEs) and Serious AEs (SAEs) Percentage of Participants With Drug-induced Liver Injury Meeting Hy's Law Criteria Plasma/Serum Concentrations of Trastuzumab Emtrastine                                                                                                                                                                                                                                                                                                                                                                                                                                                                                                                                                                                                                                                                                                                                                                                                                                                                                                                                                                                    | Phase 1         | 34  | March 2007        | February 23, 2017 |
| EGFR inhibitors | NCT02999672 | A Study to Determine Best Tumor Response With Trastuzumab Emtrastine in Human Epidermal Growth Factor Receptor 2 (HER2) Overexpressing Solid Tumors | Completed | Bladder Cancer Pancreas Cancer Cholangiocellular Carcinoma | Drug: Trastuzumab Emtrastine                                                      | Percentage of Participants With a Best Overall Response of Complete Response (CR) or Partial Response (PR) According to Response Evaluation Criteria in Solid Tumors (RECIST) Percentage of Participants With Death or Disease Progression According to RECIST Progression-Free Survival (PFS) According to RECIST Percentage of Participants Who Died Overall Survival (OS) Duration of Response (DOR) According to RECIST                                                                                                                                                                                                                                                                                                                                                                                                                                                                                                                                                                                                                                                                                                                                                                                                                                                                                                                                                                                                                                                                                                                                                                                                                                                                                     | Phase 2         | 20  | December 23, 2016 | August 28, 2019   |
| EGFR inhibitors | NCT02748213 | A Study of Herceptin (Trastuzumab) in Women With Human Epidermal Growth Factor Receptor (HER) 2-Positive Advanced and/or Metastatic Breast Cancer   | Completed | Breast Cancer                                              | Drug: Xeloda Drug: Taxotere Drug: Herceptin                                       | Percentage of Participants With a Best Overall Response of Complete Response (CR) or Partial Response (PR) According to Response Evaluation Criteria in Solid Tumors (RECIST) Percentage of Participants With Death or Disease Progression According to RECIST Progression-Free Survival (PFS) According to RECIST Percentage of Participants Who Died Overall Survival (OS) Duration of Response (DOR) According to RECIST                                                                                                                                                                                                                                                                                                                                                                                                                                                                                                                                                                                                                                                                                                                                                                                                                                                                                                                                                                                                                                                                                                                                                                                                                                                                                     | Phase 2         | 225 | February 2002     | November 22, 2016 |

|                 |             |                                                                                                                                                                                                 |           |                                |                                                                                                                                |                                                                                                                                                                                                                                                                                                                                                                                                                                                                                                                                                                                                                                                                                                                                                                                                                                                                                                                                                                                                                                                                                                                                                                                                                                                                                                                                                                                                                                                                                                                                                                                                                                                                                                                                                                                                                                                                                               |                 |     |                  |                   |
|-----------------|-------------|-------------------------------------------------------------------------------------------------------------------------------------------------------------------------------------------------|-----------|--------------------------------|--------------------------------------------------------------------------------------------------------------------------------|-----------------------------------------------------------------------------------------------------------------------------------------------------------------------------------------------------------------------------------------------------------------------------------------------------------------------------------------------------------------------------------------------------------------------------------------------------------------------------------------------------------------------------------------------------------------------------------------------------------------------------------------------------------------------------------------------------------------------------------------------------------------------------------------------------------------------------------------------------------------------------------------------------------------------------------------------------------------------------------------------------------------------------------------------------------------------------------------------------------------------------------------------------------------------------------------------------------------------------------------------------------------------------------------------------------------------------------------------------------------------------------------------------------------------------------------------------------------------------------------------------------------------------------------------------------------------------------------------------------------------------------------------------------------------------------------------------------------------------------------------------------------------------------------------------------------------------------------------------------------------------------------------|-----------------|-----|------------------|-------------------|
| EGFR inhibitors | NCT02345174 | Immuno Positron Emission Tomography Study of GSK2849330 in Subjects With Human Epidermal Growth Factor Receptor 3-Positive Solid Tumors                                                         | Completed | Cancer Neoplasms               | Drug: GSK2849330 Drug: 89Zr-GSK2849330                                                                                         | Standardized Uptake Value (SUV) Volume of region of interest Anatomical localization of radiolabel Uptake of-GSK2849330 in tumors using pharmacometric model Change in uptake parameters in response to the dose difference between dose 1 and 2 Average radioactivity concentration in whole blood and plasma Tumor features assessment Composite of pharmacokinetic (PK) parameters of GSK2849330 Organ dose measured in milliSievert (mSv) for each organ Effective dose value measured in mSv Overall incidence of Adverse events (AEs) and Serious Adverse events (SAEs) Change from baseline in laboratory parameters Left ventricular ejection fraction (LVEF) assessment Vital signs monitoring Serum titer of the anti-GSK2849330 antibodies.                                                                                                                                                                                                                                                                                                                                                                                                                                                                                                                                                                                                                                                                                                                                                                                                                                                                                                                                                                                                                                                                                                                                        | Phase 1         | 6   | March 19, 2015   | February 21, 2019 |
| EGFR inhibitors | NCT02191891 | Xentuzumab (BI 836845) Plus Afatinib in Patients With Epidermal Growth Factor Receptor (EGFR) Mutant Non-small Cell Lung Cancer (NSCLC)                                                         | Completed | Carcinoma, Non-Small-Cell Lung | Drug: BI 836845 Drug: afatinib                                                                                                 | Maximum tolerated dose (MTD) of BI 836845 in combination with afatinib - part A Dose limiting toxicity (DLT) during the first treatment course - part A Objective response (OR), defined as complete response (CR) or partial response (PR) Disease control (DC), defined as complete response (CR), partial response (PR) or stable disease (SD) Time to objective response, defined as the duration of time from the date of first treatment administration until objective response Duration of objective response, defined as the duration of time from first objective response to the date of first objective tumour                                                                                                                                                                                                                                                                                                                                                                                                                                                                                                                                                                                                                                                                                                                                                                                                                                                                                                                                                                                                                                                                                                                                                                                                                                                                    | Phase 1         | 32  | October 21, 2014 | May 1, 2018       |
| EGFR inhibitors | NCT00234416 | IRESSA Combined With Radiotherapy & Gemcitabine as First-Line Treatment in Locally Advanced                                                                                                     | Completed | Pancreatic Cancer              | Drug: Gefitinib Drug: Gemcitabine                                                                                              | Incidence of DLT Overall objective tumour response (CR and PR) based on the Response Evaluation Criteria in Solid Tumours (RECIST), assessed by abdominal CT (abdominal scan) Nature, incidence and severity of adverse events (AEs) and serious adverse events                                                                                                                                                                                                                                                                                                                                                                                                                                                                                                                                                                                                                                                                                                                                                                                                                                                                                                                                                                                                                                                                                                                                                                                                                                                                                                                                                                                                                                                                                                                                                                                                                               | Phase 1 Phase 2 | 45  | August 2002      | April 23, 2009    |
| EGFR inhibitors | NCT01684878 | Pertuzumab in Platinum-Resistant Low Human Epidermal Growth Factor Receptor 3 (HER3) Messenger Ribonucleic Acid (mRNA) Epithelial Ovarian Cancer (PENELOPE)                                     | Completed | Ovarian Cancer                 | Drug: Gemcitabine (Chemotherapy) Drug: Paclitaxel (Chemotherapy) Drug: Pertuzumab Drug: Placebo Drug: Topotecan (Chemotherapy) | Part 1: Percentage of Participants With Adverse Events (AEs) Part 2: Progression Free Survival (PFS) as Assessed by a Blinded Independent Review Committee (IRC) Including Malignant Bowel Obstruction (MBO) Part 1- Objective Response Rate (ORR) Part 2- Objective Response Rate (ORR) Part 1: PFS Assessed by the Investigator Part 2: Progression-free Survival (PFS) Assessed by the Investigator Part 2: European Organization for Research and Treatment of Cancer (EORTC) Quality of Life (QoL) Questionnaire (QLQ) of Core 30 (C30) Score Part 2: Percentage of Participants With Adverse Events (AEs) Part 2: Overall Survival                                                                                                                                                                                                                                                                                                                                                                                                                                                                                                                                                                                                                                                                                                                                                                                                                                                                                                                                                                                                                                                                                                                                                                                                                                                      | Phase 3         | 208 | October 22, 2012 | May 23, 2017      |
| EGFR inhibitors | NCT02658461 | An Observational Time and Motion Study of Trastuzumab Subcutaneous (SC) and Intravenous (IV) Formulations in Human Epidermal Growth Factor Receptor 2 (HER2)-Positive Early Breast Cancer (EBC) | Completed | Breast Cancer                  | Drug: Trastuzumab                                                                                                              | Monetary Cost of Health Care Resources Used Per Episode of Care in Administration of Trastuzumab Single-Use Injection Device Monetary Cost of Health Care Resources Used Per Episode of Care in Administration of Trastuzumab SC Injection Monetary Cost of Health Care Resources Used Per Episode of Care in Preparation and Administration of Trastuzumab IV Infusion Task-Specific HCP Time Required Per Episode of Care in the Administration of Trastuzumab Single-Use Injection Device Task-Specific HCP Time Required Per Episode of Care in the Administration of Trastuzumab SC Injection Task-Specific HCP Time Required Per Episode of Care in the Administration of Trastuzumab IV Infusion Task-Specific HCP Time Required Per Episode of Care in the Preparation of Trastuzumab IV Infusion Total HCP Time Required Per Episode of Care in the Administration of Trastuzumab Single-Use Injection Device Total HCP Time Required Per Episode of Care in the Administration of Trastuzumab SC Injection Total HCP Time Required Per Episode of Care in the Administration of Trastuzumab IV Infusion Total HCP Time Required Per Episode of Care in the Preparation of Trastuzumab IV Infusion Number of Consumable Medical Supplies Used Per Episode of Care in the Administration of Trastuzumab Single-Use Injection Device Number of Consumable Medical Supplies Used Per Episode of Care in the Administration of Trastuzumab SC Injection Number of Consumable Medical Supplies Used Per Episode of Care in the Administration of Trastuzumab IV Infusion Number of Consumable Medical Supplies Used Per Episode of Care in the Preparation of Trastuzumab IV Infusion Total Participant Time Per Episode of Care Spent in the Care Unit for Administration of Trastuzumab Total Participant Time Per Episode of Care Spent in the Chair for Administration of Trastuzumab |                 | 36  | February 2012    | April 29, 2016    |

|                 |             |                                                                                                                                                                                                                                        |           |                                         |                                                                  |                                                                                                                                                                                                                                                                                                                                                                                                                                                                                                                                                                                                                                                                                                                                                                                                                                                                                                                                                                                                                                                                                                                                                                                                                                                                                                                                                                                                                                                             |         |     |                    |                    |
|-----------------|-------------|----------------------------------------------------------------------------------------------------------------------------------------------------------------------------------------------------------------------------------------|-----------|-----------------------------------------|------------------------------------------------------------------|-------------------------------------------------------------------------------------------------------------------------------------------------------------------------------------------------------------------------------------------------------------------------------------------------------------------------------------------------------------------------------------------------------------------------------------------------------------------------------------------------------------------------------------------------------------------------------------------------------------------------------------------------------------------------------------------------------------------------------------------------------------------------------------------------------------------------------------------------------------------------------------------------------------------------------------------------------------------------------------------------------------------------------------------------------------------------------------------------------------------------------------------------------------------------------------------------------------------------------------------------------------------------------------------------------------------------------------------------------------------------------------------------------------------------------------------------------------|---------|-----|--------------------|--------------------|
| EGFR inhibitors | NCT01926886 | A Study of Subcutaneous At Home Administration of Trastuzumab (Herceptin) in Participants With Human Epidermal Growth Factor Receptor 2-positive (HER2+) Early Breast Cancer (eBC)                                                     | Completed | Breast Cancer                           | Drug: Trastuzumab                                                | Percentage of Participants With Adverse Events (AEs) and Serious Adverse Events (SAEs) Number of Participants With Modalities Assessed Using Patient Satisfaction Questionnaire 1 (PSQ1): In-Hospital Number of Participants With Modalities Assessed Using Patient Satisfaction Questionnaire 2 (PSQ2): At Home Participant-reported Severity of Symptoms as Assessed by Monroe Dunaway Anderson Symptom Inventory (MDASI) Questionnaire Participant-reported Interference of Symptoms With Life as Assessed by MDASI Questionnaire Number of Participants With Modalities Assessed Using Patient Experience Questionnaires (PEX) - Part 1:In-Hospital Number of Participants With Modalities Assessed Using PEX - Part 2: At Home Number of Health Care Professionals With Modalities Assessed Using Health Care Professional Questionnaire (HCPEX-Progression-free Survival Per RECIST, v. 1.1 (PFS1)) Progression-free Survival Per Investigator (PFS2) Objective Response Rate (ORR) for All Participants and Participants With EGFR Mutation E19del or L858R Disease Control Rate (DCR) for All Participants and Participants With EGFR Mutation E19del or L858R Progression-free Survival for Participants With EGFR Mutation E19del or L858R Per RECIST, v. 1.1 (PFS1) Overall Survival (OS) for All Participants and Participants With EGFR Mutation E19del or L858R Number of Participants With Adverse Events Correlation Between EGFR Mutations | Phase 3 | 102 | November 19, 2013  | September 18, 2019 |
| EGFR inhibitors | NCT01310036 | A Study of Tarceva (Erlotinib) as First Line Therapy in Participants With Non-Small Cell Lung Cancer Harboring Epidermal Growth Factor Receptor (EGFR) Mutations                                                                       | Completed | Non-Squamous Non-Small Cell Lung Cancer | Drug: Erlotinib                                                  | Percentage of Participants With Objective Response as Per Investigator Assessment According to Response Evaluation Criteria in Solid Tumors Version 1.1 (RECIST v. 1.1) Percentage of Participants Who Died Overall Survival (OS) Percentage of Participants With PFS Event of Disease Progression, as Per Investigator Assessment According to RECIST v. 1.1, or Death Progression-Free Survival (PFS) as Per Investigator Assessment According to RECIST v. 1.1 Percentage of Participants With DOR Event of Disease Progression, Assessed According to RECIST v1.1 Duration of Objective Response (DOR) Assessed According to RECIST v1.1 Percentage of Participants With Clinical Benefit as Per Investigator Assessment According to RECIST, v1.1 Percentage of Participants With Adverse Events (AEs) and Serious AEs (SAEs) Maximum Observed Concentration (Cmax) for Trastuzumab Emtansine and Total Trastuzumab AUCinf for Trastuzumab Emtansine and Total Trastuzumab Elimination Half-Life (t1/2) for Trastuzumab Emtansine and Total Trastuzumab Volume of Distribution (Vss) for Trastuzumab Emtansine and Total Trastuzumab Clearance (CL) for Trastuzumab Emtansine and Total Trastuzumab Maximum Observed Concentration (Cmax) for N2'-Deacetyl-N2'-(3-mercaptopropyl)-Maytansine (DM1) Percentage of Participants With Treatment-Emergent Anti-Drug Antibodies (ADAs)                                                                      | Phase 2 | 208 | April 30, 2011     | September 12, 2018 |
| EGFR inhibitors | NCT02289833 | A Study of Trastuzumab Emtansine in Participants With Human Epidermal Growth Factor Receptor (HER)2 Immunohistochemistry (IHC)-Positive, Locally Advanced or Metastatic Non-Small Cell Lung Cancer (NSCLC)                             | Completed | Non-Small Cell Lung Cancer              | Drug: Trastuzumab Emtansine                                      | Percentage of Participants With Objective Response as Per Investigator Assessment According to Response Evaluation Criteria in Solid Tumors Version 1.1 (RECIST v. 1.1) Percentage of Participants Who Died Overall Survival (OS) Percentage of Participants With PFS Event of Disease Progression, as Per Investigator Assessment According to RECIST v. 1.1, or Death Progression-Free Survival (PFS) as Per Investigator Assessment According to RECIST v. 1.1 Percentage of Participants With DOR Event of Disease Progression, Assessed According to RECIST v1.1 Duration of Objective Response (DOR) Assessed According to RECIST v1.1 Percentage of Participants With Clinical Benefit as Per Investigator Assessment According to RECIST, v1.1 Percentage of Participants With Adverse Events (AEs) and Serious AEs (SAEs) Maximum Observed Concentration (Cmax) for Trastuzumab Emtansine and Total Trastuzumab AUCinf for Trastuzumab Emtansine and Total Trastuzumab Elimination Half-Life (t1/2) for Trastuzumab Emtansine and Total Trastuzumab Volume of Distribution (Vss) for Trastuzumab Emtansine and Total Trastuzumab Clearance (CL) for Trastuzumab Emtansine and Total Trastuzumab Maximum Observed Concentration (Cmax) for N2'-Deacetyl-N2'-(3-mercaptopropyl)-Maytansine (DM1) Percentage of Participants With Treatment-Emergent Anti-Drug Antibodies (ADAs)                                                                      | Phase 2 | 49  | December 15, 2014  | August 7, 2019     |
| EGFR inhibitors | NCT02896855 | A Study to Evaluate the Efficacy and Safety of Pertuzumab + Trastuzumab + Docetaxel Versus Placebo + Trastuzumab + Docetaxel in Previously Untreated Human Epidermal Growth Factor Receptor 2 (HER2)-Positive Metastatic Breast Cancer | Completed | Breast Cancer                           | Drug: Docetaxel Drug: Pertuzumab Drug: Placebo Drug: Trastuzumab | Progression-Free Survival, as Determined by the Investigator Using Response Evaluation Criteria in Solid Tumors Version 1.1 (RECIST v1.1) Percentage of Participants With 1 Year of Progression-Free Survival, as Determined by the Investigator Using RECIST v1.1 Overall Survival Percentage of Participants With 1 Year of Overall Survival Percentage of Participants With Measurable Disease at Baseline Who Achieved an Objective Response (Complete or Partial Response), as Determined by the Investigator Using RECIST v1.1 Duration of Objective Response, as Determined by the Investigator Using RECIST v1.1 Number of Participants With at Least One Adverse Event Number of Participants With at Least One Grade ≥3 Adverse Event Number of Participants With at Least One Adverse Event Leading to Withdrawal From Any Treatment Number of Participants With Symptomatic Left Ventricular Systolic Dysfunction (LVSD), as Determined Using Echocardiography (ECHO) or Multiple-Gated Acquisition (MUGA) Scan Number of Participants With an Asymptomatic Left Ventricular Ejection Fraction (LVEF) Event, as Determined Using ECHO or MUGA Scan Change From Baseline in LVEF Over Time, as Determined Using ECHO or MUGA Scan Change From Baseline to Maximum On-Treatment Decrease in LVEF at Any Point During the Study                                                                                                                    | Phase 3 | 243 | September 13, 2016 | March 10, 2021     |

|                 |             |                                                                                                                                                                                                         |           |                                         |                                                                                                                                              |                                                                                                                                                                                                                                                                                                                                                                                                                                                                                                                                                                                                                                                                                                                                                                                                                                                                                                                                                                                                                                                                                                                                                                                                                                                                                                                                                                                                                                                                                                                                                                                                                                                                                                                                                                                                                                                                                                                                                       |         |     |                   |                    |
|-----------------|-------------|---------------------------------------------------------------------------------------------------------------------------------------------------------------------------------------------------------|-----------|-----------------------------------------|----------------------------------------------------------------------------------------------------------------------------------------------|-------------------------------------------------------------------------------------------------------------------------------------------------------------------------------------------------------------------------------------------------------------------------------------------------------------------------------------------------------------------------------------------------------------------------------------------------------------------------------------------------------------------------------------------------------------------------------------------------------------------------------------------------------------------------------------------------------------------------------------------------------------------------------------------------------------------------------------------------------------------------------------------------------------------------------------------------------------------------------------------------------------------------------------------------------------------------------------------------------------------------------------------------------------------------------------------------------------------------------------------------------------------------------------------------------------------------------------------------------------------------------------------------------------------------------------------------------------------------------------------------------------------------------------------------------------------------------------------------------------------------------------------------------------------------------------------------------------------------------------------------------------------------------------------------------------------------------------------------------------------------------------------------------------------------------------------------------|---------|-----|-------------------|--------------------|
| EGFR inhibitors | NCT02019277 | A Study of Pertuzumab and Trastuzumab Subcutaneous (SC) Treatment in Combination With a Taxane in Participants With Human Epidermal Growth Factor Receptor 2 (HER2)-Positive Metastatic Breast Cancer   | Completed | Breast Cancer                           | Drug: Docetaxel Drug: Nab-paclitaxel Drug: Paclitaxel Drug: Trastuzumab                                                                      | Percentage of Participants With Adverse Events (AEs) and Serious AEs Percentage of Participants With AEs by National Cancer Institute Common Terminology Criteria for Adverse Events (NCI CTCAE) Version 4.0 Intensity Grades Percentage of Participants With AEs Leading to Premature Discontinuation of Investigational Medicinal Products (IMPs) Percentage of Participants With AEs of Suspected Cardiac Origin, by New York Heart Association Classification (NYHA) Percentage of Participants With Left Ventricular Ejection Fraction (LVEF) Below 50% Percentage of Participants With Best Overall Response (BOR) of Complete Response (CR) or Partial Response (PR) According to Response Evaluation Criteria in Solid Tumors (RECIST) Version 1.1 Percentage of Participants With PD (Assessed According to RECIST Version 1.1) or Death Due to Any Cause Progression-free Survival (PFS) Assessed According to RECIST Version 1.1 Percentage of Participants Who Died Due to Any Cause Overall Survival (OS) Event-free Survival (EFS) Assessed According to RECIST Version 1.1 Percentage of Participants Who Died During Receiving Second-Line of Treatment OS During Second-Line of Treatment Number of Participants Receiving Second-Line Treatment by Treatment Type                                                                                                                                                                                                                                                                                                                                                                                                                                                                                                                                                                                                                                                                   | Phase 3 | 50  | December 5, 2013  | September 13, 2018 |
| EGFR inhibitors | NCT01940497 | A Study of the Safety of Subcutaneously Administered Trastuzumab (Herceptin) in Participants With Early and Locally Advanced Human Epidermal Growth Factor Receptor 2 (HER2)-Positive Breast Cancer     | Completed | Breast Cancer                           | Drug: Doxorubicin Drug: Docetaxel Drug: Paclitaxel Drug: Trastuzumab                                                                         | Percentage of Participants With Treatment-Emergent Adverse Events (TEAEs) Actual Dose of Trastuzumab Administered Duration of Treatment With Trastuzumab Percentage of Participants Who Received Concomitant Medications Percentage of Participants With Pathological Complete Response (pCR) (Neoadjuvant Groups Only) Using Mammography Percentage of Participants With Event (Local, Regional or Distant Recurrence, Contralateral Breast Cancer or Death) Using Mammography Disease-Free Survival (DFS) Using Mammography Percentage of Participants Who Died Overall Survival (OS) Percentage of Participants by Response to Patient Satisfaction                                                                                                                                                                                                                                                                                                                                                                                                                                                                                                                                                                                                                                                                                                                                                                                                                                                                                                                                                                                                                                                                                                                                                                                                                                                                                                | Phase 3 | 240 | November 15, 2013 | November 3, 2020   |
| EGFR inhibitors | NCT01964391 | A Study of Participant Satisfaction and Safety With Subcutaneously Administered Trastuzumab (Herceptin) in Participants With Human Epidermal Growth Factor Receptor 2 (HER2)-Positive Early             | Completed | Breast Cancer                           | Drug: Trastuzumab Drug: Doxorubicin Drug: Cyclophosphamide Drug: Paclitaxel Drug: Docetaxel Drug: Carboplatin Drug: Neoadjuvant chemotherapy | Participant Satisfaction Questionnaire Score Percentage of Participants with Adverse Events (AEs) Healthcare Professional Experience and Satisfaction Questionnaire Score Overall Survival (OS) Disease-Free Survival (DFS) Number of Days on Trastuzumab Treatment Total Daily Dose of Trastuzumab Cumulative Dose of Trastuzumab Duration of Treatment, Follow-up, and Safety Observation                                                                                                                                                                                                                                                                                                                                                                                                                                                                                                                                                                                                                                                                                                                                                                                                                                                                                                                                                                                                                                                                                                                                                                                                                                                                                                                                                                                                                                                                                                                                                           | Phase 3 | 174 | February 21, 2014 | April 2, 2019      |
| EGFR inhibitors | NCT01918254 | A Study to Evaluate Lumretuzumab in Combination With Pertuzumab and Paclitaxel in Participants With Metastatic Breast Cancer Expressing Human Epidermal Growth Factor Receptor (HER) 3 and HER2 Protein | Completed | Breast Cancer                           | Drug: Paclitaxel Drug: Pertuzumab Drug: Lumretuzumab                                                                                         | Percentage of Participants With Dose-Limiting Toxicities (DLTs) Percentage of Participants With Adverse Events Percentage of Participants With Anti-Human Antibodies (HAHAs) to lumretuzumab [RO5479599] Pharmacokinetics: Area Under the Concentration-Time Curve (AUC) of lumretuzumab [RO5479599] Pharmacokinetics: Maximum Serum Concentration (Cmax) of lumretuzumab [RO5479599] Pharmacokinetics: Trough Serum Concentration (Ct) of lumretuzumab [RO5479599] Pharmacokinetics: Time to Reach Maximum Serum Concentration (tmax) of lumretuzumab [RO5479599] Pharmacokinetics: Clearance (CL) of lumretuzumab [RO5479599] Pharmacokinetics: Volume of distribution (V) of lumretuzumab [RO5479599] Pharmacokinetics: Accumulation Ratio of lumretuzumab [RO5479599] Pharmacokinetics: Elimination Half-Life (t1/2) of lumretuzumab [RO5479599] Pharmacokinetics: Serum Concentration at the Time of Tumor Progression (Cprog) of lumretuzumab [RO5479599] Pharmacokinetics: Serum Concentration at the Time of Tumor Response (Complete response [CR]/Partial Response [PR]) of lumretuzumab [RO5479599] Pharmacokinetics: Serum Concentration at the Time of DLT of lumretuzumab [RO5479599] Pharmacokinetics: Serum Concentration at the Time of Tumor and Skin Biopsy (Cb) of lumretuzumab [RO5479599] Pharmacokinetics: Serum Concentration at the Time of Infusion-Related Reactions (IRR) of lumretuzumab [RO5479599] Recommended Phase II Dose of lumretuzumab [RO5479599] Percentage of Participants With Best Overall Response of CR or PR (Objective Response) Assessed Using Response Evaluation Criteria in Solid Tumors Version 1.1 (RECIST V1.1) Criteria Percentage of Participants With Best Overall Response of CR or PR or SD (Disease Control), Assessed Using RECIST V1.1 Criteria Duration of Response, Assessed Using RECIST V1.1 Criteria Progression-Free Survival Assessed Using RECIST V1.1 Criteria Overall Survival | Phase 1 | 66  | August 6, 2013    | September 12, 2017 |
| EGFR inhibitors | NCT01887886 | A Study of Onartuzumab in Combination With Erlotinib in Patients With MET-Positive Stage IIIB or IV Non-Small Cell Lung Cancer Carrying an Activating Epidermal Growth Factor Receptor                  | Completed | Non-Squamous Non-Small Cell Lung Cancer | Drug: erlotinib Drug: onartuzumab Drug: placebo                                                                                              | Progression-free survival (investigator-assessed according to RECIST v1.1) Overall survival Overall response rate Time to deterioration ( $\geq$ 10 points [transformed score] from baseline) in patient-reported lung cancer symptoms Patient reported outcomes: HRQoL/EORTC QLQ-C30/EORTC QLQ-LC31 questionnaires Safety: Incidence of adverse events Pharmacokinetics: Area under the concentration-time curve (AUC)                                                                                                                                                                                                                                                                                                                                                                                                                                                                                                                                                                                                                                                                                                                                                                                                                                                                                                                                                                                                                                                                                                                                                                                                                                                                                                                                                                                                                                                                                                                               | Phase 3 | 10  | December 2013     | November 2, 2016   |

|                 |             |                                                                                                                                                                                                                                             |           |                                                                                       |                                                       |                                                                                                                                                                                                                                                                                                                                                                                                                                                                                                                                                                                                                                                                                                                                                                                                                                                                                                                                                                                                                    |                                                                                                                                                                                                                                                                                                                                                                                                                                                                                                                                                                                                                                                                                                                                                                                                                                                                                                                                                                                                                                                                                                                                                                                                                                                                                  |         |                   |                    |                   |
|-----------------|-------------|---------------------------------------------------------------------------------------------------------------------------------------------------------------------------------------------------------------------------------------------|-----------|---------------------------------------------------------------------------------------|-------------------------------------------------------|--------------------------------------------------------------------------------------------------------------------------------------------------------------------------------------------------------------------------------------------------------------------------------------------------------------------------------------------------------------------------------------------------------------------------------------------------------------------------------------------------------------------------------------------------------------------------------------------------------------------------------------------------------------------------------------------------------------------------------------------------------------------------------------------------------------------------------------------------------------------------------------------------------------------------------------------------------------------------------------------------------------------|----------------------------------------------------------------------------------------------------------------------------------------------------------------------------------------------------------------------------------------------------------------------------------------------------------------------------------------------------------------------------------------------------------------------------------------------------------------------------------------------------------------------------------------------------------------------------------------------------------------------------------------------------------------------------------------------------------------------------------------------------------------------------------------------------------------------------------------------------------------------------------------------------------------------------------------------------------------------------------------------------------------------------------------------------------------------------------------------------------------------------------------------------------------------------------------------------------------------------------------------------------------------------------|---------|-------------------|--------------------|-------------------|
| EGFR inhibitors | NCT01702571 | A Study of Trastuzumab Emtansine in Participants With Human Epidermal Growth Factor Receptor 2 (HER2)-Positive Breast Cancer Who Have Received Prior Anti-HER2 And Chemotherapy-based Treatment                                             | Completed | Breast Cancer                                                                         | Drug: Trastuzumab Emtansine                           | Percentage of Participants with Adverse Events Progression-Free Survival According to Response Evaluation for Solid Tumors (RECIST) Version (v) 1.1 As Per Investigator Assessment Overall Survival According to RECIST v 1.1 As Per Investigator Assessment Percentage of Participants with Best Overall Response (Complete Response [CR] or Partial Response [PR]) According to RECIST v 1.1 As Per Investigator Assessment Percentage of Participants with Clinical Benefit (CR or PR or Stable Disease [SD]) According to RECIST v 1.1 Duration of Response According to RECIST v 1.1 Time                                                                                                                                                                                                                                                                                                                                                                                                                     | Phase 3                                                                                                                                                                                                                                                                                                                                                                                                                                                                                                                                                                                                                                                                                                                                                                                                                                                                                                                                                                                                                                                                                                                                                                                                                                                                          | 2185    | November 27, 2012 | February 18, 2021  |                   |
| EGFR inhibitors | NCT00637091 | Efficacy Analysis of Cetuximab Plus Irinotecan in Patients With Wild-type KRAS Without Regard to Epidermal Growth Factor Receptor (EGFR) Expressions                                                                                        | Completed | Advanced Colorectal Cancer                                                            | Drug: Cetuximab, irinotecan                           | Response rate Progression free survival, overall survival                                                                                                                                                                                                                                                                                                                                                                                                                                                                                                                                                                                                                                                                                                                                                                                                                                                                                                                                                          | Phase 2                                                                                                                                                                                                                                                                                                                                                                                                                                                                                                                                                                                                                                                                                                                                                                                                                                                                                                                                                                                                                                                                                                                                                                                                                                                                          | 40      | March 2008        | January 22, 2021   |                   |
| EGFR inhibitors | NCT02658734 | A Study of Trastuzumab Emtansine in Indian Patients With Human Epidermal Growth Factor Receptor 2 (HER2)-Positive Unresectable Locally Advanced or Metastatic Breast Cancer Who Have Received Prior Treatment With Trastuzumab and a Taxane | Completed | HER2 Positive Breast Cancer, Metastatic Breast Cancer, Locally Advanced Breast Cancer | Drug: Trastuzumab emtansine                           | Severity of Adverse Events Percentage of Participants With Adverse Events Percentage of Participants With Serious Adverse Events (SAEs) Severity of SAEs as Per the National Cancer Institute Common Terminology Criteria for Adverse Events (NCI-CTCAE), Version 4.03 Percentage of Participants With Non-Serious Adverse Events of Special Interest Laboratory Results Abnormalities Percentage of Participants With Adverse Events Leading to Discontinuation of Study Medication Percentage of Participants With Adverse Events Leading to Modification of Study Medication Percentage of Participants With Adverse Events Leading to Interruption of Study Medication Exposure to Study Drug Percentage of Participants With Drug-Induced Liver Injury Meeting Hy's Law Criteria Percentage of Participants With Congestive Heart Failure Change in Left Ventricular Ejection Fraction (LVEF) as Measured by Echocardiogram Overall Response Rate (ORR) Progression-Free Survival (PFS) Overall Survival (OS) | Phase 4                                                                                                                                                                                                                                                                                                                                                                                                                                                                                                                                                                                                                                                                                                                                                                                                                                                                                                                                                                                                                                                                                                                                                                                                                                                                          | 70      | November 1, 2016  | February 9, 2021   |                   |
| EGFR inhibitors | NCT00800436 | A Dose-Finding Study of Subcutaneous Herceptin (Trastuzumab) in Healthy Male Volunteers and Human Epidermal Growth Factor Receptor 2 (HER2)-                                                                                                | Completed | Breast Cancer                                                                         | Drug: Herceptin                                       | Area Under the Concentration-Time Curve Extrapolated to Infinity (AUCinf) of Trastuzumab Trough Serum Concentration on Day 22 (CDay22) of Trastuzumab Maximum Observed Serum Concentration of Trastuzumab (Cmax) Time to Maximum Serum Concentration (Tmax) of Trastuzumab Terminal Elimination Half-Life (T1/2) of Trastuzumab                                                                                                                                                                                                                                                                                                                                                                                                                                                                                                                                                                                                                                                                                    | Phase 1                                                                                                                                                                                                                                                                                                                                                                                                                                                                                                                                                                                                                                                                                                                                                                                                                                                                                                                                                                                                                                                                                                                                                                                                                                                                          | 66      | November 2008     | December 16, 2016  |                   |
| EGFR inhibitors | NCT01774786 | A Study of Pertuzumab in Combination With Trastuzumab and Chemotherapy in Participants With Human Epidermal Growth Factor Receptor 2 (HER2)-Positive Metastatic Gastroesophageal Junction or Gastric Cancer                                 | Completed | Gastric Cancer                                                                        | Drug: Capecitabine Drug: Pertuzumab Drug: Trastuzumab | 5-Fluorouracil Drug: Cisplatin Drug: Placebo Drug: Trastuzumab                                                                                                                                                                                                                                                                                                                                                                                                                                                                                                                                                                                                                                                                                                                                                                                                                                                                                                                                                     | Overall Survival Progression-Free Survival, as Determined by the Investigator According to Response Evaluation Criteria in Solid Tumors Version 1.1 (RECIST v1.1) Criteria Primary Analysis of the Percentage of Participants With Overall Objective Response, as Determined by the Investigator According to RECIST v1.1 Criteria Final Analysis of the Percentage of Participants With Overall Objective Response, as Determined by the Investigator According to RECIST v1.1 Criteria Duration of Objective Response, as Determined by the Investigator According to RECIST v1.1 Criteria Percentage of Participants With Clinical Benefit, as Determined by the Investigator According to RECIST v1.1 Criteria Overview of Safety: Number of Participants With at Least One Adverse Event, Severity Determined According to National Cancer Institute Common Terminology Criteria for Adverse Events (NCI CTCAE), Version 4.03 Number of Participants With Symptomatic or Asymptomatic Left Ventricular Systolic Dysfunction (LVSD) Change From Baseline in European Organization for Research and Treatment of Cancer (EORTC) Quality of Life Questionnaire-Core 30 (QLQ-C30) Score Change From Baseline in EORTC QLQ-Gastric Cancer Module (EORTC QLQ-STO22) Score Maximum | Phase 3 | 780               | June 10, 2013      | December 30, 2020 |
| EGFR inhibitors | NCT00874419 | Erlotinib Versus Gemcitabine/Carboplatin in Chemonaive Stage IIIB/IV Non-Small Cell Lung Cancer Patients With Epidermal Growth Factor Receptor                                                                                              | Completed | Non-small Cell Lung Cancer                                                            | Drug: erlotinib Drug: gemcitabine/carboplatin         | Progression free survival OS ORR Time to Progression lung cancer symptoms and health-related quality of life (HRQL) explore the biological markers (tumor tissue)                                                                                                                                                                                                                                                                                                                                                                                                                                                                                                                                                                                                                                                                                                                                                                                                                                                  | Phase 3                                                                                                                                                                                                                                                                                                                                                                                                                                                                                                                                                                                                                                                                                                                                                                                                                                                                                                                                                                                                                                                                                                                                                                                                                                                                          | 165     | August 2008       | September 25, 2014 |                   |
| EGFR inhibitors | NCT01003899 | A Phase II Trial of Afatinib(BIBW 2992) in Third-line Treatment for Patients With Stage IIIB/IV Adenocarcinoma of the Lung Harboring Wild-type Epidermal                                                                                    | Completed | Carcinoma, Non-Small-Cell Lung                                                        | Drug: afatinib (BIBW 2992)                            | Percentage of Participants With Best Objective Response Percentage of Participants With Disease Control (DC) Progression Free Survival (PFS) Time Duration of Disease Control (DC) Time to OR Duration of OR                                                                                                                                                                                                                                                                                                                                                                                                                                                                                                                                                                                                                                                                                                                                                                                                       | Phase 2                                                                                                                                                                                                                                                                                                                                                                                                                                                                                                                                                                                                                                                                                                                                                                                                                                                                                                                                                                                                                                                                                                                                                                                                                                                                          | 43      | October 2009      | December 31, 2013  |                   |

|                 |             |                                                                                                                                                                                                  |           |                                                                 |                                                                                                                                                |                                                                                                                                                                                                                                                                                                                                                                                                                                                                                                                                                                                                                                                                                                                                                                                                                                                                                                                                                                                                                                                                                                                                                                                                                                                                                                                                                                                                                                                                                                                                                                                                                                                                                                                                                                                                                                                                                                                                                                                                                                                                                                                                                                                                                                                                                                                                                                                                                                                                                                                                                                                                                                                                                                                                    |                 |      |                    |              |     |
|-----------------|-------------|--------------------------------------------------------------------------------------------------------------------------------------------------------------------------------------------------|-----------|-----------------------------------------------------------------|------------------------------------------------------------------------------------------------------------------------------------------------|------------------------------------------------------------------------------------------------------------------------------------------------------------------------------------------------------------------------------------------------------------------------------------------------------------------------------------------------------------------------------------------------------------------------------------------------------------------------------------------------------------------------------------------------------------------------------------------------------------------------------------------------------------------------------------------------------------------------------------------------------------------------------------------------------------------------------------------------------------------------------------------------------------------------------------------------------------------------------------------------------------------------------------------------------------------------------------------------------------------------------------------------------------------------------------------------------------------------------------------------------------------------------------------------------------------------------------------------------------------------------------------------------------------------------------------------------------------------------------------------------------------------------------------------------------------------------------------------------------------------------------------------------------------------------------------------------------------------------------------------------------------------------------------------------------------------------------------------------------------------------------------------------------------------------------------------------------------------------------------------------------------------------------------------------------------------------------------------------------------------------------------------------------------------------------------------------------------------------------------------------------------------------------------------------------------------------------------------------------------------------------------------------------------------------------------------------------------------------------------------------------------------------------------------------------------------------------------------------------------------------------------------------------------------------------------------------------------------------------|-----------------|------|--------------------|--------------|-----|
| EGFR inhibitors | NCT00045032 | Herceptin (Trastuzumab) in Treating Women With Human Epidermal Growth Factor Receptor (HER) 2-Positive Primary Breast Cancer                                                                     | Completed | Breast Cancer                                                   | Drug: Herceptin                                                                                                                                | Percentage of Participants With Disease-Free Survival (DFS) Events in Herceptin 1-Year Arm Compared to Observation: 1-Year Median Follow-Up Percentage of Participants With DFS Events in Herceptin 2-Year Arm Compared to Observation: 1-Year Median Follow-Up DFS Rate According to Kaplan-Meier Analysis in Herceptin 1-Year Arm Compared to Observation: 1-Year Median Follow-Up DFS Rate According to Kaplan-Meier Analysis in Herceptin 2-Year Arm Compared to Observation: 1-Year Median Follow-Up Percentage of Participants With DFS Events Compared to Observation: 8-Year Median Follow-Up DFS Rate at Year 3 According to Kaplan-Meier Analysis Compared to Observation: 8-Year Median Follow-Up DFS Rate at Year 5 According to Kaplan-Meier Analysis Compared to Observation: 8-Year Median Follow-Up DFS Rate at Year 7 According to Kaplan-Meier Analysis Compared to Observation: 8-Year Median Follow-Up DFS Rate at Year 8 According to Kaplan-Meier Analysis Compared to Observation: 8-Year Median Follow-Up Percentage of Participants With DFS Events Compared to Observation: 10-Year Maximum Follow-Up DFS Rate at Year 3 According to Kaplan-Meier Analysis Compared to Observation: 10-Year Maximum Follow-Up DFS Rate at Year 5 According to Kaplan-Meier Analysis Compared to Observation: 10-Year Maximum Follow-Up DFS Rate at Year 7 According to Kaplan-Meier Analysis Compared to Observation: 10-Year Maximum Follow-Up DFS Rate at Year 8 According to Kaplan-Meier Analysis Compared to Observation: 10-Year Maximum Follow-Up DFS Rate at Year 9 According to Kaplan-Meier Analysis Compared to Observation: 10-Year Maximum Follow-Up DFS Rate at Year 10 According to Kaplan-Meier Analysis Compared to Observation: 10-Year Maximum Follow-Up Percentage of Participants With DFS Events in 1-Year Versus 2-Year Herceptin: 10-Year Maximum Follow-Up DFS Rate According to Kaplan-Meier Analysis in 1-Year Versus 2-Year Herceptin: 10-Year Maximum Follow-Up Percentage of Participants With Overall Survival (OS) Events in Herceptin 1-Year Arm Compared to Observation: 1-Year Median Follow-Up Percentage of Participants With OS Events in Herceptin 2-Year Arm Compared to Observation: 1-Year Median Follow-Up OS Rate According to Kaplan-Meier Analysis in Herceptin 1-Year Arm Compared to Observation: 1-Year Median Follow-Up OS Rate According to Kaplan-Meier Analysis in Herceptin 2-Year Arm Compared to Observation: 1-Year Median Follow-Up Percentage of Participants With OS Events Compared to Observation: 8-Year Median Follow-Up OS Rate According to Kaplan-Meier Analysis Compared to Observation: 8-Year Median Follow-Up Percentage of Participants With OS | Phase 3         | 5099 | November 2001      | April 2017   | 27, |
| EGFR inhibitors | NCT00647114 | A Study to Test V930/V932 in Patients With Cancers Expressing Human Epidermal Growth Factor Receptor 2 (HER-2) and/or Carcinoembryonic Antigen                                                   | Completed | Cancer                                                          | Biological: V930 Biological: V932                                                                                                              | To determine the safety and tolerability of V930/V932 followed by EP in cancer patients To determine whether V930/V932 can elicit HER-2 specific and CEA specific immune responses measured using an ELISPOT assay                                                                                                                                                                                                                                                                                                                                                                                                                                                                                                                                                                                                                                                                                                                                                                                                                                                                                                                                                                                                                                                                                                                                                                                                                                                                                                                                                                                                                                                                                                                                                                                                                                                                                                                                                                                                                                                                                                                                                                                                                                                                                                                                                                                                                                                                                                                                                                                                                                                                                                                 | Phase 1         | 41   | August 2007        | March 2015   | 13, |
| EGFR inhibitors | NCT01449461 | A Study to Evaluate the Safety, Tolerability, Pharmacokinetics and Preliminary Anti-Tumor Activity of the Oral Anaplastic Lymphoma Kinase (ALK) Inhibitor Brigatinib (AP26113)                   | Completed | Lymphoma, Large-Cell, Anaplastic Carcinoma, Non-Small-Cell Lung | Drug: Brigatinib                                                                                                                               | Recommended Phase 2 Dose of Brigatinib Objective Response Rate (ORR) Number of Participants Who Had at Least One Treatment-Emergent Adverse Event (TEAE) Maximum Tolerated Dose (MTD) Assessed in Dose Escalation Phase of the Study Number of Participants With Dose Limiting Toxicities (DLTs) Assessed in Dose Escalation Phase of the Study Cmax: Maximum Observed Plasma Concentration for Brigatinib Tmax: Time to Reach the Maximum Plasma Concentration (Cmax) for Brigatinib AUC(0-24): Area Under the Plasma Concentration-Time Curve From Time 0 to 24 Hours Post-dose for Brigatinib Terminal Phase Elimination Half-life (T1/2) for Brigatinib Best Overall Response Duration of Response Progression Free Survival (PFS) Overall Survival (OS) Intracranial Objective Response Rate Duration of Intracranial                                                                                                                                                                                                                                                                                                                                                                                                                                                                                                                                                                                                                                                                                                                                                                                                                                                                                                                                                                                                                                                                                                                                                                                                                                                                                                                                                                                                                                                                                                                                                                                                                                                                                                                                                                                                                                                                                                         | Phase 1 Phase 2 | 137  | September 20, 2011 | March 2020   | 4,  |
| EGFR inhibitors | NCT00193063 | Weekly Gemcitabine and Trastuzumab in the Treatment of Patients With Human Epidermal Growth Factor Receptor 2 (HER2)                                                                             | Completed | Breast Cancer                                                   | Drug: Trastuzumab Drug: Gemcitabine                                                                                                            | Overall Response Rate (ORR) Progression Free Survival (PFS) Overall Survival (OS)                                                                                                                                                                                                                                                                                                                                                                                                                                                                                                                                                                                                                                                                                                                                                                                                                                                                                                                                                                                                                                                                                                                                                                                                                                                                                                                                                                                                                                                                                                                                                                                                                                                                                                                                                                                                                                                                                                                                                                                                                                                                                                                                                                                                                                                                                                                                                                                                                                                                                                                                                                                                                                                  | Phase 2         | 41   | July 2001          | March 2014   | 12, |
| EGFR inhibitors | NCT00950300 | A Study to Compare Subcutaneous (SC) Versus Intravenous (IV) Administration of Herceptin (Trastuzumab) in Women With Human Epidermal Growth Factor Receptor (HER) 2-Positive Early Breast Cancer | Completed | Breast Cancer                                                   | Drug: 5-Fluorouracil Drug: Cyclophosphamide Drug: Docetaxel Drug: Epirubicin Drug: Herceptin IV [trastuzumab] Drug: Herceptin SC [trastuzumab] | Observed Serum Trough Concentration (Ctrough) of Trastuzumab Prior to Surgery Percentage of Participants With Pathological Complete Response (pCR) Observed Ctrough of Trastuzumab After Surgery Predicted Ctrough of Trastuzumab Prior to Surgery Predicted Ctrough of Trastuzumab After Surgery Number of Participants With Ctrough of Trastuzumab >20 µg/mL Prior to Surgery Number of Participants With Ctrough of Trastuzumab >20 µg/mL After Surgery Maximum Serum Concentration (Cmax) of Trastuzumab Prior to Surgery Time of Maximum Serum Concentration (Tmax) of Trastuzumab Prior to Surgery Area Under the Concentration-Time Curve From 0 to 21 Days (AUC21d) of Trastuzumab Prior to Surgery Cmax of Trastuzumab After Surgery Tmax of Trastuzumab After Surgery AUC21d of Trastuzumab After Surgery Percentage of Participants With Total Pathological Complete Response (tpCR) Percentage of Participants With Complete Response (CR) or Partial Response (PR) According to Response Evaluation Criteria in Solid Tumors (RECIST) Version 1.0, Among Those With Measurable Disease at Baseline Time to Response According to RECIST Version 1.0, Among Those With Measurable Disease at Baseline Percentage of Participants Who Experienced a Protocol-Defined Event Event-Free Survival                                                                                                                                                                                                                                                                                                                                                                                                                                                                                                                                                                                                                                                                                                                                                                                                                                                                                                                                                                                                                                                                                                                                                                                                                                                                                                                                                                                                                          | Phase 3         | 596  | October 16, 2009   | January 2018 | 23, |

|                 |             |                                                                                                                                                                                                                                                                        |           |                          |                                                                                                                                                    |                                                                                                                                                                                                                                                                                                                                                                                                                                                                                                                                                                                                                                                                                                                                                                                                                                                                                                                                                                                                                                                                                                                                                                                                                                                                                                                                                                                   |         |     |                    |                   |
|-----------------|-------------|------------------------------------------------------------------------------------------------------------------------------------------------------------------------------------------------------------------------------------------------------------------------|-----------|--------------------------|----------------------------------------------------------------------------------------------------------------------------------------------------|-----------------------------------------------------------------------------------------------------------------------------------------------------------------------------------------------------------------------------------------------------------------------------------------------------------------------------------------------------------------------------------------------------------------------------------------------------------------------------------------------------------------------------------------------------------------------------------------------------------------------------------------------------------------------------------------------------------------------------------------------------------------------------------------------------------------------------------------------------------------------------------------------------------------------------------------------------------------------------------------------------------------------------------------------------------------------------------------------------------------------------------------------------------------------------------------------------------------------------------------------------------------------------------------------------------------------------------------------------------------------------------|---------|-----|--------------------|-------------------|
| EGFR inhibitors | NCT01810393 | A Study to Assess Preference for Subcutaneous Trastuzumab Treatment in Participants With Human Epidermal Growth Factor Receptor (HER)2-Positive Metastatic Breast Cancer Responding to First-Line Intravenous Trastuzumab for at                                       | Completed | Breast Cancer            | Drug: Trastuzumab                                                                                                                                  | Percentage of Participants With Preference for Either SC or IV Route of Administration According to Participant Preference Questionnaire (PPQ) Score Percentage of Participants With Adverse Events Percentage of Health Care Professionals With Preference for Either SC or IV Administration According to Health Care Professional Questionnaire (HCPQ) Score                                                                                                                                                                                                                                                                                                                                                                                                                                                                                                                                                                                                                                                                                                                                                                                                                                                                                                                                                                                                                   | Phase 3 | 114 | June 11, 2013      | September 4, 2020 |
| EGFR inhibitors | NCT02194166 | A Study to Investigate the Tolerability of Subcutaneous (SC) Trastuzumab Administration in Participants With Human Epidermal Growth Factor Receptor 2 (HER2) Positive Early Breast Cancer (eBC) Using Either a Single-Use Injection Device or Manual Administration    | Completed | Breast Cancer            | Drug: Trastuzumab Drug: Paclitaxel Drug: Docetaxel                                                                                                 | Participant Pain as Measured on a 10 Centimeter (cm) Visual Analogue Scale Participant Discomfort as Measured on a 10 cm Visual Analogue Scale Healthcare Professional Satisfaction With SC Formulation as Assessed by Health Care Professional Questionnaire (HCPQ) Patient Satisfaction With SC Formulation as Assessed by Patients Satisfaction Questionnaire (PSQ) Healthcare Professional Perceived Time Savings With SC Trastuzumab as Assessed by HCPQ Percentage of Participants With Adverse Events Overall Survival Disease-Free Survival, Assessed as per Institutional Practice or American Society of Clinical Oncology (ASCO) Adjuvant Follow-up Guidelines 2006 Number of Days on Trastuzumab Treatment Total Daily Dose of                                                                                                                                                                                                                                                                                                                                                                                                                                                                                                                                                                                                                                        | Phase 3 | 90  | July 18, 2014      | June 10, 2019     |
| EGFR inhibitors | NCT01491737 | A Study of Pertuzumab in Combination With Trastuzumab Plus an Aromatase Inhibitor in Participants With Metastatic Human Epidermal Growth Factor Receptor 2 (HER2)-Positive and Hormone Receptor-Positive Advanced Breast Cancer                                        | Completed | Breast Cancer            | Drug: Trastuzumab Drug: Pertuzumab Drug: Aromatase Inhibitor Drug: Induction Chemotherapy                                                          | Progression-Free Survival (PFS) Overall Survival (OS) Overall Response Rate (ORR) Clinical Benefit Rate (CBR) Duration of Response (DOR) Time to Response (TTR) Change From Baseline in Health-Related Quality of Life as Determined by European Quality of Life 5-Dimension (EQ-5D) Visual Analog Scale (VAS) Scores Overview of the Number of Participants With Adverse Events, Severity Determined According to NCI-CTCAE Version 4.03 Number of Participants Who Died Over the Course of the Study by Reported Cause of Death and Time of Death Relative to First or Last Dose of Study Treatment Change From Baseline in Left Ventricular Ejection                                                                                                                                                                                                                                                                                                                                                                                                                                                                                                                                                                                                                                                                                                                           | Phase 2 | 258 | February 17, 2012  | October 28, 2020  |
| EGFR inhibitors | NCT01565083 | A Study to Assess Efficacy and Safety of Pertuzumab Given in Combination With Trastuzumab and Vinorelbine in Participants With Metastatic or Locally Advanced Human Epidermal Growth Factor Receptor (HER) 2-Positive Breast Cancer                                    | Completed | Breast Cancer            | Drug: Trastuzumab Drug: Pertuzumab Drug: Vinorelbine                                                                                               | Percentage of Participants With Best Overall Response (BOR) as Assessed by Investigator According to Response Evaluation Criteria in Solid Tumors Version 1.1 (RECIST v1.1) Time to Response as Assessed by Investigator According to RECIST v 1.1 Duration of Response (DOR) as Assessed by Investigator According to RECIST v 1.1 Percentage of Participants With Disease Progression as Assessed by Investigator According to RECIST v1.1 or Death From Any Cause Progression-free Survival (PFS) as Assessed by Investigator According to RECIST v 1.1 Percentage of Participants With Disease Progression as Assessed by Investigator According to RECIST v1.1 Time to Progression (TTP) as Assessed by Investigator According to RECIST v 1.1 Percentage of Participants Who Died From Any Cause Overall Survival (OS) Change From Baseline in European Quality of Life-5 Dimensions (EQ-5D) Questionnaire Visual Analogue Scale                                                                                                                                                                                                                                                                                                                                                                                                                                            | Phase 2 | 213 | April 2012         | November 22, 2016 |
| EGFR inhibitors | NCT02924883 | A Study to Evaluate the Efficacy and Safety of Trastuzumab Emtansine or Atezolizumab-Placebo in Participants With Human Epidermal Growth Factor-2 (HER2) Positive Locally Advanced or Metastatic Breast Cancer (BC) Who Received Prior Trastuzumab and Taxane Based    | Completed | Metastatic Breast Cancer | Drug: Atezolizumab Drug: Trastuzumab emtansine Other: Placebo                                                                                      | Progression-Free Survival (PFS) as Determined by Investigator's Tumor Assessment Using Response Evaluation Criteria in Solid Tumors (RECIST) Version 1.1 (v1.1) Percentage of Participants With Adverse Events Overall Survival (OS) Percentage of Participants With Objective Response (OR) as Determined by Investigator's Tumor Assessment Using RECIST v1.1 Duration of OR as Determined by Investigator's Tumor Assessment Using RECIST v1.1 Maximum Serum Concentration (Cmax) of Trastuzumab Emtansine Cmax of Deacetyl Mercapto 1-Oxopropyl Maytansine (DM1) Cmax of Total Trastuzumab Cmax of Atezolizumab Percentage of Participants With Anti-therapeutic Antibodies (ATAs) to Atezolizumab Percentage of Participants With ATAs to Trastuzumab                                                                                                                                                                                                                                                                                                                                                                                                                                                                                                                                                                                                                        | Phase 2 | 202 | September 26, 2016 | February 17, 2021 |
| EGFR inhibitors | NCT02132949 | A Study Evaluating Pertuzumab (Perjeta) Combined With Trastuzumab (Herceptin) and Standard Anthracycline-based Chemotherapy in Participants With Human Epidermal Growth Factor Receptor 2 (HER2)-Positive Locally Advanced, Inflammatory, or Early-stage Breast Cancer | Completed | Breast Cancer            | Drug: 5-Fluorouracil Drug: Cyclophosphamide Drug: Docetaxel Drug: Doxorubicin Drug: Epirubicin Drug: Paclitaxel Drug: Pertuzumab Drug: Trastuzumab | Percentage of Participants With New York Heart Association (NYHA) Class III and IV Heart Failure During the Neoadjuvant Treatment Period Percentage of Participants With Drop in Left Ventricular Ejection Fraction (LVEF) of at Least 10 Percentage Points From Baseline and to Below 50% During the Neoadjuvant Treatment Period Percentage of Participants With NYHA Class III and IV Heart Failure During the Adjuvant Treatment Period at Primary Completion Date (03 March 2016) Percentage of Participants With Drop in LVEF of at Least 10 Points From Baseline and to Below 50% During the Adjuvant Treatment Period at Primary Completion Date (03 March 2016) Percentage of Participants With NYHA Class III and IV Heart Failure at the End of Study Percentage of Participants With Drop in LVEF of at Least 10 Points From Baseline and to Below 50% at End of Study Percentage of Participants With Anti-Therapeutic Antibodies (ATAs) to Pertuzumab Percentage of Participants With Total Pathological Complete Response (tpCR) Evaluated at the Time of Surgery Based on Local Pathologist's Assessment After Surgery Percentage of Participants With Clinical Response as Determined by the Investigator According to Response Evaluation Criteria in Solid Tumors (RECIST) v.1.1 During the Neoadjuvant Treatment Period Event-Free Survival Determined by the | Phase 2 | 401 | July 14, 2014      | October 14, 2020  |

|                 |             |                                                                                                                                                                                                                                                                                                   |           |                                                              |                                                                             |                                                                                                                                                                                                                                                                                                                                                                                                                                                                                                                                                                                                                                                                                                                                                                                                                                                                                                                                                                                                                                                                                                                                                                                                                                                                                                                                                                                                                                                                                                     |         |      |                   |                    |     |
|-----------------|-------------|---------------------------------------------------------------------------------------------------------------------------------------------------------------------------------------------------------------------------------------------------------------------------------------------------|-----------|--------------------------------------------------------------|-----------------------------------------------------------------------------|-----------------------------------------------------------------------------------------------------------------------------------------------------------------------------------------------------------------------------------------------------------------------------------------------------------------------------------------------------------------------------------------------------------------------------------------------------------------------------------------------------------------------------------------------------------------------------------------------------------------------------------------------------------------------------------------------------------------------------------------------------------------------------------------------------------------------------------------------------------------------------------------------------------------------------------------------------------------------------------------------------------------------------------------------------------------------------------------------------------------------------------------------------------------------------------------------------------------------------------------------------------------------------------------------------------------------------------------------------------------------------------------------------------------------------------------------------------------------------------------------------|---------|------|-------------------|--------------------|-----|
| EGFR inhibitors | NCT00509769 | A Study of Trastuzumab Emtansine (Trastuzumab-MCC-DM1) Administered Intravenously to Patients With Human Epidermal Growth Factor Receptor 2 (HER2)-Positive Metastatic Breast Cancer                                                                                                              | Completed | Metastatic Breast Cancer                                     | Drug: Trastuzumab emtansine [Kadcyla]                                       | Objective Response Assessed by the Independent Review Facility Using Response Evaluation Criteria in Solid Tumors (RECIST) Duration of Objective Response (OR) Assessed by the Independent Review Facility Using Response Evaluation Criteria in Solid Tumors (RECIST) Progression-free Survival (PFS) Assessed by the Independent Review Facility Using Response Evaluation Criteria in Solid Tumors (RECIST) Objective Response Determined by the Investigator Using Response Evaluation Criteria in Solid Tumors (RECIST) Duration of Objective Response Assessed by the Investigator Using Response Evaluation Criteria in Solid Tumors (RECIST) Progression-free Survival Assessed by the Investigator Using Response Evaluation Criteria in Solid Tumors (RECIST)                                                                                                                                                                                                                                                                                                                                                                                                                                                                                                                                                                                                                                                                                                                             | Phase 2 | 112  | July 2007         | April 2013         | 2,  |
| EGFR inhibitors | NCT00063401 | Phase II Study in Patients With Epidermal Growth Factor Receptor (EGFR) + Advanced Stage Ovarian, Primary Peritoneal and Fallopian Tube Cancer                                                                                                                                                    | Completed | Ovarian Cancer Peritoneal Neoplasms Fallopian Tube Neoplasms | Biological: Cetuximab; Drug: Paclitaxel Drug: Carboplatin                   | To determine the progression-free survival obtained with cetuximab (C225)/paclitaxel/carboplatin in subjects with newly diagnosed advanced stage ovarian, primary peritoneal, or fallopian tube cancer. To determine clinical and/or pathological response rates with cetuximab (C225)/paclitaxel/carboplatin in subjects with newly diagnosed advanced stage ovarian, primary peritoneal, or fallopian tube cancer. To evaluate the toxicity of the combination regimen in this subject population. To assess EGFR expression by immunohistochemical assay.                                                                                                                                                                                                                                                                                                                                                                                                                                                                                                                                                                                                                                                                                                                                                                                                                                                                                                                                        | Phase 2 | 39   | September 2003    | April 2010         | 8,  |
| EGFR inhibitors | NCT01748773 | A Study of the Combination of Oxaliplatin, Capecitabine, and Trastuzumab With Chemoradiotherapy in the Adjuvant Setting in Operated Participants With Human Epidermal Growth Factor Receptor-2 Positive (HER2+) Gastric                                                                           | Completed | Gastric Cancer Gastroesophageal Junction Cancer              | Drug: Oxaliplatin Radiation: Radiation Drug: Capecitabine Drug: Trastuzumab | Percentage of Participants With Adverse Events (AEs) and Serious Adverse Events (SAEs) Change from Baseline in Eastern Cooperative Oncology Group (ECOG) Performance Status Score Percentage of Participants with Disease-Free Survival, Using Response Evaluation Criteria for Solid Tumors (RECIST) Overall Survival                                                                                                                                                                                                                                                                                                                                                                                                                                                                                                                                                                                                                                                                                                                                                                                                                                                                                                                                                                                                                                                                                                                                                                              | Phase 2 | 34   | January 29, 2013  | October 2019       | 9,  |
| EGFR inhibitors | NCT00891579 | Study of Pemetrexed Versus Gefitinib in Patients With Locally Advanced or Metastatic Non Small Cell Lung Cancer Who Have Previously Received Platinum-Based Chemotherapy Without Epidermal Growth Factor Receptor (EGFR)                                                                          | Completed | Non Small Cell Lung Cancer                                   | Drug: Pemetrexed (Alimta) Drug: Gefitinib (IRESSA)                          | Progression free survival (PFS) Response rate (RR) Overall survival (OS)                                                                                                                                                                                                                                                                                                                                                                                                                                                                                                                                                                                                                                                                                                                                                                                                                                                                                                                                                                                                                                                                                                                                                                                                                                                                                                                                                                                                                            | Phase 2 | 161  | February 2009     | December 10, 2012  |     |
| EGFR inhibitors | NCT00373425 | A Study of Erlotinib (Tarceva) After Surgery With or Without Adjuvant Chemotherapy in Non-Small Cell Lung Carcinoma (NSCLC) Patients Who Have Epidermal Growth Factor Receptor (EGFR) Positive Tumors                                                                                             | Completed | Non-small Cell Lung Cancer                                   | Drug: Erlotinib Drug: Placebo                                               | Disease Free Survival (DFS) Overall Survival (OS) Disease-free Survival in Participants With EGFR Mutation - Positive Tumors Overall Survival in Participants With EGFR Mutation - Positive Tumors Number of Participants With Adverse Events (AEs)                                                                                                                                                                                                                                                                                                                                                                                                                                                                                                                                                                                                                                                                                                                                                                                                                                                                                                                                                                                                                                                                                                                                                                                                                                                 | Phase 3 | 1252 | September 2006    | September 17, 2015 |     |
| EGFR inhibitors | NCT00943670 | Corrected QT Interval Effects of Trastuzumab Emtansine (T-DM1) in Patients With Human Epidermal Growth Factor Receptor 2 (HER2)-Positive Locally Advanced or Metastatic Breast Cancer and the Safety and Tolerability of Combined T-DM1 and Pertuzumab in Patients With Early Disease Progression | Completed | Metastatic Breast Cancer                                     | Biological: pertuzumab Biological: Trastuzumab emtansine [Kadcyla]          | Change From Baseline in Mean Duration of the QTc Interval Change From Baseline in Mean Duration of the QTc Interval Using Bazett's Correction Change From Baseline in Uncorrected QT Interval Change From Baseline in PR Interval Change From Baseline in QRS Duration Change From Baseline in Heart Rate Percentage of Participants Within Each Absolute QTc Interval Category Percentage of Participants Within Each Baseline-adjusted QTc Interval Category Percentage of Participants With New Abnormal U Waves Percentage of Participants With New Abnormal T Waves Percentage of Participants With an Objective Response During the Single-agent Trastuzumab Emtansine Treatment Period Duration of Objective Response Based on Investigator Assessment During the Single-agent Trastuzumab Emtansine Treatment Period Progression-free Survival During the Single-agent Trastuzumab Emtansine Treatment Period Percentage of Participants With Clinical Benefit During the Single-agent Trastuzumab Emtansine Treatment Period Number of Participants With Adverse Events (AEs) Number of Participants With Decreased Ejection Fraction Maximum Observed Serum Concentration of T-DM1 and Total Trastuzumab Area Under the Concentration-time Curve From Time 0 to Time of Last Measurable Concentration for T-DM1 and Total Trastuzumab Area Under the Concentration-time Curve From Time 0 Extrapolated to Infinity for T-DM1 and Total Trastuzumab Terminal Half-life for T-DM1 and Total | Phase 2 | 51   | July 2009         | May 2013           | 27, |
| EGFR inhibitors | NCT03603379 | Doxorubicin-loaded Anti-EGFR-immunoliposomes (C225-ILs-dox) in High-grade Gliomas                                                                                                                                                                                                                 | Completed | Glioblastoma                                                 | Drug: C225-ILs-dox                                                          | Ratio of C225-ILs-dox concentration Tumour response according to RANO criteria on the final MRI scan Best achieved tumour response (1st or second MRI scan) during treatment phase according to RANO criteria ( Event free survival Progression free survival Overall survival Toxicity as graded by the CTCAE Version 4.0)                                                                                                                                                                                                                                                                                                                                                                                                                                                                                                                                                                                                                                                                                                                                                                                                                                                                                                                                                                                                                                                                                                                                                                         | Phase 1 | 9    | November 16, 2018 | December 8, 2020   |     |



|                 |             |                                                                                                                                      |           |                                                                                     |                                                                                                |                                                                                                                                                                                                                                                                                                                                                                                                                                                                                                                                                                                                                                                                                                                                                                                                                                                                                                                                                                                                                                                 |                 |                    |                   |                    |
|-----------------|-------------|--------------------------------------------------------------------------------------------------------------------------------------|-----------|-------------------------------------------------------------------------------------|------------------------------------------------------------------------------------------------|-------------------------------------------------------------------------------------------------------------------------------------------------------------------------------------------------------------------------------------------------------------------------------------------------------------------------------------------------------------------------------------------------------------------------------------------------------------------------------------------------------------------------------------------------------------------------------------------------------------------------------------------------------------------------------------------------------------------------------------------------------------------------------------------------------------------------------------------------------------------------------------------------------------------------------------------------------------------------------------------------------------------------------------------------|-----------------|--------------------|-------------------|--------------------|
| EGFR inhibitors | NCT03761901 | Study to Describe Treatment Patterns and Outcomes in EGFRm NSCLC Patients in Belgium                                                 | Completed | Carcinoma, Non-Small-Cell Lung                                                      | Drug: 1L treatment Drug: 2L Treatment Drug: 3L treatment                                       | demographic characteristics of patients diagnosed between 1 September 2015 and 31 December 2017 NSCLC characteristics at diagnosis between 1 September 2015 and 31 December 2017 NSCLC disease characteristics at start of 2L or 3L treatment during observation window Type of treatment received during 1L, 2L or 3L treatment during the observation window Time on treatment during 1L, 2L or 3L treatment during the observation window Proportion of patients receiving a definitive, systemic therapy for NSCLC or no definitive, systemic therapy for NSCLC/best supportive care treatment after progression on their previous therapy Reason for discontinuation after 1L, 2L or 3L treatment during observation window EGFR testing characteristics at diagnosis between 1 September 2015 and 31 December 2017 EGFR testing characteristics after progression on previous treatment PFS for 1L, 2L or 3L treatment during the observation window Time-to-treatment discontinuation for 1L, 2L and 3L treatment during the observation | 141             | September 21, 2018 | May 8, 2020       |                    |
| EGFR inhibitors | NCT02914990 | Safety, Tolerability and Pharmacokinetic Profile of BPI-15086 in EGFR T790M Mutation-positive                                        | Completed | Non-Small Cell Lung Cancer                                                          | Drug: BPI-15086                                                                                | Adverse events Cmax Half life AUC Objective Response Rate Progression-Free Survival                                                                                                                                                                                                                                                                                                                                                                                                                                                                                                                                                                                                                                                                                                                                                                                                                                                                                                                                                             | Phase 1         | 36                 | December 29, 2016 | July 18, 2019      |
| EGFR inhibitors | NCT02914990 | Safety, Tolerability and Pharmacokinetic Profile of BPI-15086 in EGFR T790M Mutation-positive                                        | Completed | Non-Small Cell Lung Cancer                                                          | Drug: BPI-15086                                                                                | Adverse events Cmax Half life AUC Objective Response Rate Progression-Free Survival                                                                                                                                                                                                                                                                                                                                                                                                                                                                                                                                                                                                                                                                                                                                                                                                                                                                                                                                                             | Phase 1         | 36                 | December 29, 2016 | July 18, 2019      |
| EGFR inhibitors | NCT02131259 | Long-term Observation PMS for Afatinib                                                                                               | Completed | Carcinoma, Non-Small-Cell Lung                                                      | Drug: Afatinib dimaleate                                                                       | Incidence of Adverse Drug Reactions (ADRs) Objective Overall Response Based on Physician's Assessment [According to RECIST Version 1.1]                                                                                                                                                                                                                                                                                                                                                                                                                                                                                                                                                                                                                                                                                                                                                                                                                                                                                                         |                 | 1605               | May 7, 2014       | September 7, 2018  |
| EGFR inhibitors | NCT02047903 | GIOTRIF in First Line Therapy of Advanced NSCLC With EGFR-mutations                                                                  | Completed | Carcinoma, Non-Small-Cell Lung                                                      | Drug: Afatinib                                                                                 | Progression Free Survival (PFS) Rate After 12 Months Objective Response Rate (ORR) Disease Control Rate (DCR) Progression Free Survival (PFS) Percentage of Participants With Treatment Emergent Adverse Events (TEAEs) and Serious Adverse Events (SAEs) Toxicity and Side-effect Profile: Incidence of Diarrhea, Skin Reactions, Stomatitis and Paronychia Treatment Duration Symptom Control - Time to Worsening (Cough, Dyspnea and Pain) Percentage of Participants With Treatment Modification                                                                                                                                                                                                                                                                                                                                                                                                                                                                                                                                            |                 | 161                | March 5, 2014     | January 9, 2020    |
| EGFR inhibitors | NCT01138384 | Study of Foretinib in Combination With Lapatinib in Patients With Metastatic Breast Cancer                                           | Completed | Breast Cancer                                                                       | Drug: Foretinib Drug: Lapatinib                                                                | Toxicity, maximum administered dose and the recommended phase II dose Pharmacokinetic evaluation of lapatinib Preliminary evidence of efficacy                                                                                                                                                                                                                                                                                                                                                                                                                                                                                                                                                                                                                                                                                                                                                                                                                                                                                                  | Phase 1 Phase 2 | 19                 | June 3, 2010      | September 17, 2020 |
| EGFR inhibitors | NCT02514174 | Afatinib Treatment for Patients With EGFR Mutation Positive NSCLC Who Are Age 70 or Older                                            | Completed | Carcinoma, Non-Small-Cell Lung ErbB Receptors                                       | Drug: Afatinib                                                                                 | Percentage of Participants Reporting an Adverse Event (AE) Leading to Dose Reduction of Afatinib Percentage of Participants With Adverse Event = Diarrhoea of Common Terminology Criteria for Adverse Events (CTCAE) Grade 3 or Higher Percentage of Participants With Adverse Event = Rash/Acne (Grouped Term) of CTCAE Grade 3 or Higher Percentage of Participants With Adverse Event = Stomatitis (Grouped Term) of CTCAE Grade 3 or Higher Percentage of Participants With Adverse Event = Paronychia (Grouped Term) of CTCAE Grade 3 or Higher Time to First Dose Reduction of Afatinib                                                                                                                                                                                                                                                                                                                                                                                                                                                   | Phase 4         | 25                 | August 18, 2015   | March 30, 2020     |
| EGFR inhibitors | NCT01198028 | Erlotinib in Treating Patients With Recurrent or Metastatic Skin Squamous Cell Carcinoma                                             | Completed | Metastatic Skin Squamous Cell Carcinoma Recurrent Skin Squamous Cell Carcinoma      | Drug: Erlotinib                                                                                | Overall Response Rate Duration of Response Duration of Stable Disease Progression-free Survival Overall Survival Number of Participants With Safety and Tolerability of Erlotinib                                                                                                                                                                                                                                                                                                                                                                                                                                                                                                                                                                                                                                                                                                                                                                                                                                                               | Phase 2         | 42                 | March 10, 2011    | June 11, 2020      |
| EGFR inhibitors | NCT01609543 | A Study of Tarceva (Erlotinib) in First Line in Patients With Locally Advanced or Metastatic Lung Adenocarcinoma With EGFR           | Completed | Non-Squamous Non-Small Cell Lung Cancer                                             | Drug: erlotinib [Tarceva]                                                                      | Progression-Free Survival (PFS) Percentage of Participants With Best Overall Response (BOR) Percentage of Participants Who Were Alive at 1 Year                                                                                                                                                                                                                                                                                                                                                                                                                                                                                                                                                                                                                                                                                                                                                                                                                                                                                                 | Phase 4         | 62                 | May 2012          | February 1, 2016   |
| EGFR inhibitors | NCT01866410 | Cabozantinib-S-Malate and Erlotinib Hydrochloride in Treating Patients With Previously Treated Metastatic Non-Small Cell Lung Cancer | Completed | Recurrent Non-Small Cell Lung Carcinoma Stage IV Non-Small Cell Lung Cancer AJCC v7 | Drug: Cabozantinib S-malate Drug: Erlotinib Hydrochloride Other: Laboratory Biomarker Analysis | Objective Response Rate Percentage of Patients With a Greater Than 30% Increase in Tumor Doubling Time Number of Adverse Events Best Response Patient Count Progression-free Survival Overall Survival                                                                                                                                                                                                                                                                                                                                                                                                                                                                                                                                                                                                                                                                                                                                                                                                                                          | Phase 2         | 37                 | May 20, 2013      | May 16, 2019       |
| EGFR inhibitors | NCT01147484 | A Study of Foretinib in Patients With Recurrent/Metastatic Breast Cancer                                                             | Completed | Recurrent Breast Cancer                                                             | Drug: Foretinib                                                                                | Objective response and early progression rate Adverse Events as a Measure of Safety and Tolerability Relationship between response and biomarkers Biomarkers in Tumour                                                                                                                                                                                                                                                                                                                                                                                                                                                                                                                                                                                                                                                                                                                                                                                                                                                                          | Phase 2         | 47                 | May 25, 2010      | April 7, 2020      |
| EGFR inhibitors | NCT01469000 | A Study of Pemetrexed and Gefitinib Versus Gefitinib in Non-Small Cell Lung Cancer (NSCLC)                                           | Completed | Carcinoma, Non Small Cell Lung                                                      | Drug: Gefitinib Drug: Pemetrexed                                                               | Progression Free Survival (PFS) Time To Progressive Disease (TTPD) Overall Survival (OS) Percentage of Participants Achieving Complete Response (CR) or Partial Response (PR) (Overall Response Rate [ORR]) Percentage of Participants With CR, PR, and Stable Disease (SD) (Disease Control Rate [DCR]) Duration of Response (DoR) Time to Worsening of Symptom (TWS) as Per Lung Cancer Symptom Scale (LCSS)                                                                                                                                                                                                                                                                                                                                                                                                                                                                                                                                                                                                                                  | Phase 2         | 195                | February 2012     | September 10, 2019 |
| EGFR inhibitors | NCT01054625 | Zalutumumab Pharmacokinetics (PK) in Squamous Cell Carcinoma of the Head and Neck (SCCHN)                                            | Completed | Head and Neck Cancer                                                                | Biological: zalutumumab                                                                        | Maximum Plasma Concentration of Zalutumumab After Fourth Infusion Area Under Curve 0-7 Days Area Under Curve 0-21 Days Elimination Half-life Clearance Apparent Volume of Distribution During the Terminal Phase Apparent Volume of Distribution at Steady State                                                                                                                                                                                                                                                                                                                                                                                                                                                                                                                                                                                                                                                                                                                                                                                | Phase 1 Phase 2 | 31                 | March 2010        | January 3, 2014    |
| EGFR inhibitors | NCT01667562 | A Study of Erlotinib in Participants With Locally Advanced or Metastatic Non-Small Cell Lung Cancer                                  | Completed | Non-Small Cell Lung Cancer                                                          | Drug: Erlotinib                                                                                | Progression-Free Survival as Assessed by Response Evaluation Criteria in Solid Tumors (RECIST) Version 1.1 (v 1.1) Proportion of Participants With Objective Response as Assessed by RECIST v 1.1 Proportion of Participants With Disease Control as Assessed by RECIST v 1.1 Proportion of Participants With Epidermal Growth Factor Receptor (EGFR) Mutations Percentage of Participants With Adverse Events Change From Baseline to End of Study in Quality of Life Score Using The Functional Assessment of                                                                                                                                                                                                                                                                                                                                                                                                                                                                                                                                 | Phase 3         | 375                | January 20, 2012  | December 20, 2019  |
| EGFR inhibitors | NCT01287754 | A Study of Tarceva (Erlotinib) in Patients With Locally Advanced or Metastatic Non-small Cell Lung Cancer Who Present EGFR Mutations | Completed | Non-Small Cell Lung Cancer                                                          | Drug: erlotinib [Tarceva]                                                                      | Progression-Free Survival (PFS) Among Erlotinib-Treated Participants With the EGFR Mutation Number of Erlotinib-Treated Participants With the EGFR Mutation With an Objective Response Per RECIST v1.1 Overall Survival (OS) Among Erlotinib-Treated and Untreated Participants Percentage of Participants Alive at 6 and 12 Months Percentage of Participants With EGFR Mutation at Screening                                                                                                                                                                                                                                                                                                                                                                                                                                                                                                                                                                                                                                                  | Phase 4         | 24                 | October 2011      | June 2, 2015       |

|                 |             |                                                                                                                                            |           |                                                  |                                                                                                                                                                                                                                                                                                                                                                                            |                                                                                                                                                                                                                                                                                                                                                                                                                                                                                                                                                                                                                         |         |      |                    |                    |
|-----------------|-------------|--------------------------------------------------------------------------------------------------------------------------------------------|-----------|--------------------------------------------------|--------------------------------------------------------------------------------------------------------------------------------------------------------------------------------------------------------------------------------------------------------------------------------------------------------------------------------------------------------------------------------------------|-------------------------------------------------------------------------------------------------------------------------------------------------------------------------------------------------------------------------------------------------------------------------------------------------------------------------------------------------------------------------------------------------------------------------------------------------------------------------------------------------------------------------------------------------------------------------------------------------------------------------|---------|------|--------------------|--------------------|
| EGFR inhibitors | NCT0005076  | Cetuximab and Irinotecan in Treating Patients With Advanced Colorectal Cancer                                                              | Completed | Colorectal Cancer                                | Biological: cetuximab Drug: irinotecan hydrochloride                                                                                                                                                                                                                                                                                                                                       | Determine the complete and partial response rates and time to progression in patients with refractory advanced colorectal carcinoma treated with cetuximab and irinotecan. Determine the safety and toxicity profile of this regimen in these patients. Assess the quality of life of patients treated with this regimen. Determine the tumor epidermal growth factor receptor levels in patients treated with this regimen                                                                                                                                                                                             | Phase 2 | 110  | October 1999       | April 12, 2013     |
| EGFR inhibitors | NCT00720304 | Erlotinib, Docetaxel, and Radiation Therapy in Stage III or Stage IV Squamous Cell Carcinoma of the Head and Neck                          | Completed | Head and Neck Cancer                             | Drug: docetaxel Drug: erlotinib hydrochloride Genetic: fluorescence in situ hybridization Genetic: polymerase chain reaction Other: immunoenzyme technique Other: immunohistochemistry staining method Other: laboratory biomarker analysis Other: pharmacological study Procedure: therapeutic conventional surgery Radiation: intensity-modulated radiation therapy Radiation: radiation | Progression-free-survival Time to progression Response rate (complete response, partial response, stable disease, and disease progression) Overall survival Toxicities Predictive values of EGFR/TGF- $\alpha$ , VEGF                                                                                                                                                                                                                                                                                                                                                                                                   | Phase 2 | 37   | November 2007      | November 26, 2015  |
| EGFR inhibitors | NCT00509002 | Iressa Study in Patients With Salivary Gland Cancer                                                                                        | Completed | Salivary Gland Cancer                            | Drug: Gefitinib                                                                                                                                                                                                                                                                                                                                                                            | Response Rate of ZD1839 in Patients With Advanced or Recurrent Salivary Gland Cancer Who Are Not Candidate for Curative Surgery or Radiotherapy                                                                                                                                                                                                                                                                                                                                                                                                                                                                         | Phase 2 | 37   | May 2004           | November 24, 2017  |
| EGFR inhibitors | NCT00020930 | Cetuximab in Treating Patients With Stage IV Colorectal Cancer                                                                             | Completed | Colorectal Cancer                                | Biological: cetuximab                                                                                                                                                                                                                                                                                                                                                                      |                                                                                                                                                                                                                                                                                                                                                                                                                                                                                                                                                                                                                         | Phase 2 |      | March 2001         | December 4, 2009   |
| EGFR inhibitors | NCT01116336 | Phase I Chemoprevention Trial With Green Tea Polyphenon E & Erlotinib in Patients With Premalignant Lesions of the Head & Neck             | Completed | Cancer of Head and Neck Neoplasms, Head and Neck | Drug: Erlotinib Dietary Supplement: Green Tea Polyphenon E                                                                                                                                                                                                                                                                                                                                 | Maximum tolerated dose (MTD) of erlotinib when administered with a constant dose of green tea polyphenon E (PPE). To assess the safety of the combination of PPE and erlotinib in patients receiving 3 different doses of erlotinib (50 mg, 75 mg, and 100 mg) in combination with PPE (200 mg EGCG TID) for 6 months.                                                                                                                                                                                                                                                                                                  | Phase 1 | 25   | March 2010         | December 5, 2018   |
| EGFR inhibitors | NCT02474355 | Real World Treatment Study of AZD9291 for Advanced/Metastatic EGFR T790M Mutation NSCLC                                                    | Completed | Lung Cancer                                      | Procedure: T790M+ Testing Procedure: Baseline Visit Blood & Urine Testing Procedure: Baseline ECG Procedure: Visual Slit-Lamp                                                                                                                                                                                                                                                              | Efficacy of AZD9291 by the analysis of overall survival. Safety of AZD9291 by assessment of Serious Adverse Events, Adverse Events of special interest (Interstitial Lung Disease/pneumonitis-like events, Cardiac events) Efficacy of AZD9291 by the analysis of Progression Free Survival (PFS)                                                                                                                                                                                                                                                                                                                       | Phase 3 | 3020 | September 18, 2015 | March 17, 2020     |
| EGFR inhibitors | NCT00633750 | Erlotinib in Treating Patients With Breast Cancer That Can Be Removed by Surgery                                                           | Completed | Breast Cancer                                    | Drug: erlotinib hydrochloride Genetic: TUNEL assay Genetic: protein expression analysis Other: immunohistochemistry staining method Other: laboratory biomarker analysis Other: liquid chromatography Other: mass spectrometry Other: matrix-assisted laser desorption ionization mass spectrometry Procedure: therapeutic                                                                 | Number of Participants Experiencing in Situ Anti-tumor Effect of Tarceva Molecular Profile of Participants Who Are Responsive to Tarceva Average Post-treatment Plasma Level of Erlotinib Hydrochloride                                                                                                                                                                                                                                                                                                                                                                                                                 | Phase 2 | 50   | August 2002        | September 5, 2012  |
| EGFR inhibitors | NCT00030537 | Erlotinib in Treating Patients With Locally Advanced or Metastatic                                                                         | Completed | Breast Cancer                                    | Drug: erlotinib hydrochloride                                                                                                                                                                                                                                                                                                                                                              |                                                                                                                                                                                                                                                                                                                                                                                                                                                                                                                                                                                                                         | Phase 2 |      | November 2001      | June 19, 2013      |
| EGFR inhibitors | NCT01378962 | A Study of Tarceva (Erlotinib) in Patients With Locally Advanced or Metastatic Non-Small Cell Lung Cancer (TRIGGER)                        | Completed | Non-Squamous Non-Small Cell Lung Cancer          | Drug: erlotinib                                                                                                                                                                                                                                                                                                                                                                            | Percentage of Participants With Disease Progression or Death at 12 Months After Baseline Progression-Free Survival (PFS) Probability of Being Progression Free 12 Months After Baseline Percentage of Participants Who Died Overall Survival (OS) Percentage of Participants With a Response by Best Overall Response Percentage of Participants With Objective Response Percentage of Participants Achieving CR, PR, or SD as Best Overall Response Percentage of Participants With Primary and Secondary Resistance Percentage of Participants With Epidermal Growth Factor Receptor (EGFR) Mutation by Mutation Type | Phase 2 | 50   | March 31, 2011     | January 23, 2018   |
| EGFR inhibitors | NCT00411047 | Gefitinib in Treating Patients With Previously Untreated Stage IIIB or Stage IV Non-Small Cell Lung Cancer                                 | Completed | Lung Cancer                                      | Drug: gefitinib                                                                                                                                                                                                                                                                                                                                                                            | Objective tumor response rate Response duration, progression-free survival, and overall survival Safety Ability of various somatic activating mutations in the TK region of the epidermal growth factor receptor (EGFR) gene to predict response and toxicity Molecular profile Significance of germline polymorphisms of the EGFR gene, somatic amplification of the EGFR gene, and other molecular factors for their association with clinical outcome                                                                                                                                                                | Phase 2 | 34   | September 2005     | May 14, 2013       |
| EGFR inhibitors | NCT02374645 | A Phase I Study of Safety and Pharmacokinetics of Volitinib in Combination With Gefitinib in EGFR(+ NSCLC                                  | Completed | Non-Small Cell Lung Cancer                       | Drug: Volitinib Drug: gefitinib                                                                                                                                                                                                                                                                                                                                                            | Number of adverse events and serious adverse events The Pharmacokinetics (PK) profiles of AZD6094 Progression-free survival (PFS)  Disease control rate ( DCR)                                                                                                                                                                                                                                                                                                                                                                                                                                                          | Phase 1 | 64   | April 2015         | April 24, 2020     |
| EGFR inhibitors | NCT01046266 | A Study of Pharmacodynamics of RO5083945 in Patients With Head and Neck Squamous Cell Carcinoma                                            | Completed | Head and Neck Cancer                             | Drug: RO5083945 Drug: cetuximab                                                                                                                                                                                                                                                                                                                                                            | immune cell infiltration head and neck squamous cell cancer (HNSCC) pharmacodynamics: T lymphocytes, B lymphocytes, NK cells, plasma cytokine levels safety and efficacy: AEs, laboratory parameters, tumour assessments                                                                                                                                                                                                                                                                                                                                                                                                | Phase 1 | 62   | November 2009      | September 14, 2016 |
| EGFR inhibitors | NCT00054275 | Erlotinib Plus Docetaxel in Treating Patients With Stage IV or Recurrent Breast Cancer                                                     | Completed | Breast Cancer                                    | Drug: docetaxel Drug: erlotinib hydrochloride                                                                                                                                                                                                                                                                                                                                              | Disease Response (Tumor Measurements)Per RECIST Criteria v. 2000 Progression Free Survival(PFS) Overall Survival as of 2008                                                                                                                                                                                                                                                                                                                                                                                                                                                                                             | Phase 2 | 39   | December 2002      | February 17, 2016  |
| EGFR inhibitors | NCT00004865 | Cetuximab Plus Cisplatin in Treating Patients With Metastatic or Recurrent Cancer of the Head and Neck That Has Not Responded to Cisplatin | Completed | Head and Neck Cancer                             | Biological: cetuximab Drug: cisplatin Drug: fluorouracil Drug: paclitaxel                                                                                                                                                                                                                                                                                                                  |                                                                                                                                                                                                                                                                                                                                                                                                                                                                                                                                                                                                                         | Phase 2 |      | November 1999      | March 9, 2009      |

|                 |             |                                                                                                                                                                                  |           |                                                                                                                                                                                                                                                                                                                                                                                                                                                                                                                                                                                                                                                                                                                                                                                                                                                                                                                                                                                                                                                                                                                                                                                                                                                                                                                   |                                                                                                                                                                                          |                                                                                                                                                                                                                                                                                                                                                                                                                                                                                                                                                                                                                               |                 |     |                   |                  |
|-----------------|-------------|----------------------------------------------------------------------------------------------------------------------------------------------------------------------------------|-----------|-------------------------------------------------------------------------------------------------------------------------------------------------------------------------------------------------------------------------------------------------------------------------------------------------------------------------------------------------------------------------------------------------------------------------------------------------------------------------------------------------------------------------------------------------------------------------------------------------------------------------------------------------------------------------------------------------------------------------------------------------------------------------------------------------------------------------------------------------------------------------------------------------------------------------------------------------------------------------------------------------------------------------------------------------------------------------------------------------------------------------------------------------------------------------------------------------------------------------------------------------------------------------------------------------------------------|------------------------------------------------------------------------------------------------------------------------------------------------------------------------------------------|-------------------------------------------------------------------------------------------------------------------------------------------------------------------------------------------------------------------------------------------------------------------------------------------------------------------------------------------------------------------------------------------------------------------------------------------------------------------------------------------------------------------------------------------------------------------------------------------------------------------------------|-----------------|-----|-------------------|------------------|
| EGFR inhibitors | NCT00052208 | Gefitinib and Radiation Therapy in Treating Patients With Glioblastoma Multiforme                                                                                                | Completed | Adult Giant Cell Glioblastoma Adult Glioblastoma Adult Gliosarcoma                                                                                                                                                                                                                                                                                                                                                                                                                                                                                                                                                                                                                                                                                                                                                                                                                                                                                                                                                                                                                                                                                                                                                                                                                                                | Drug: gefitinib Radiation: radiation therapy Other: laboratory biomarker analysis                                                                                                        | Maximum tolerated dose of gefitinib defined as the dose at which no patients develop acute grade 5 toxicity and less than 30% of patients developed acute dose limiting toxicity graded by the National Cancer Institute Common Toxicity Criteria v2.0 Rate of late toxicities associated with gefitinib and standard cranial radiation, graded according to the NCI CTC v2.0 Overall survival, by EGFR status Progression-free survival                                                                                                                                                                                      | Phase 1 Phase 2 | 158 | March 2002        | October 30, 2020 |
| EGFR inhibitors | NCT00020917 | Cetuximab Plus Combination Chemotherapy in Treating Patients With Stage IV Colorectal Cancer                                                                                     | Completed | Colorectal Cancer                                                                                                                                                                                                                                                                                                                                                                                                                                                                                                                                                                                                                                                                                                                                                                                                                                                                                                                                                                                                                                                                                                                                                                                                                                                                                                 | Biological: cetuximab Drug: fluorouracil Drug: irinotecan hydrochloride Drug: leucovorin calcium                                                                                         |                                                                                                                                                                                                                                                                                                                                                                                                                                                                                                                                                                                                                               | Phase 2         |     | February 2001     | June 18, 2013    |
| EGFR inhibitors | NCT01614522 | A Clinical Trial Evaluating the Effect of ASLAN001 in Patients With Recurrent/Metastatic Gastric Cancer Whose Tumors Are Either HER-2 Amplified or Co-expressing HER-1 and HER-2 | Completed | Stomach Neoplasms Cancer of the Stomach Gastric Cancer Gastric Neoplasms                                                                                                                                                                                                                                                                                                                                                                                                                                                                                                                                                                                                                                                                                                                                                                                                                                                                                                                                                                                                                                                                                                                                                                                                                                          | Drug: ASLAN001                                                                                                                                                                           | The percentage of patients demonstrating clear evidence of inhibition of receptor auto-phosphorylation in HER-2 amplified patients on Day 29. The percentage of patients demonstrating clear evidence of inhibition of receptor auto-phosphorylation in HER-1 and HER-2 co-expressing patients on Day 29. The percentage of patients showing inhibition of AKT phosphorylation on Day 29. The percentage of patients showing inhibition of MAPK phosphorylation on Day 29. The percentage of patients showing inhibition of Ki67 on Day 29. The percentage of patients showing induction of apoptosis as measured by TUNEL on | Phase 2         | 24  | March 2012        | January 14, 2015 |
| EGFR inhibitors | NCT00049283 | Erlotinib, Docetaxel, and Radiation Therapy in Treating Patients With Locally Advanced Head and Neck Cancer                                                                      | Completed | Metastatic Squamous Neck Cancer With Occult Primary Squamous Cell Carcinoma Stage III Squamous Cell Carcinoma of the Hypopharynx Stage III Squamous Cell Carcinoma of the Larynx Stage III Squamous Cell Carcinoma of the Lip and Oral Cavity Stage III Squamous Cell Carcinoma of the Nasopharynx Stage III Squamous Cell Carcinoma of the Oropharynx Stage III Verrucous Carcinoma of the Larynx Stage III Verrucous Carcinoma of the Oral Cavity Stage IV Squamous Cell Carcinoma of the Hypopharynx Stage IV Squamous Cell Carcinoma of the Nasopharynx Stage IV Squamous Cell Carcinoma of the Larynx Stage IV Squamous Cell Carcinoma of the Lip and Oral Cavity Stage IV Verrucous Carcinoma of the Larynx Stage IV Verrucous Carcinoma of the Oral Cavity Stage IV Verrucous Carcinoma of the Oropharynx Stage IV Verrucous Carcinoma of the Lip and Oral Cavity Stage IV Verrucous Carcinoma of the Oropharynx Stage IV Verrucous Carcinoma of the Oral Cavity Stage IVC Squamous Cell Carcinoma of the Larynx Stage IVC Squamous Cell Carcinoma of the Lip and Oral Cavity Stage IVC Squamous Cell Carcinoma of the Oropharynx Stage IVC Verrucous Carcinoma of the Larynx Stage IVC Verrucous Carcinoma of the Oral Cavity Tongue Cancer Untreated Metastatic Squamous Neck Cancer With Occult Primary | Drug: erlotinib hydrochloride Drug: docetaxel Radiation: radiation therapy Procedure: therapeutic conventional surgery Other: laboratory biomarker analysis Other: pharmacological study | MTD defined as the dose preceding that at which 2 of 3 or 2 of 6 patients experience dose-limiting toxicity assessed using Common Toxicity Criteria (CTC) version 3.0 (Phase I) Pharmacokinetic profile (Phase I) Time to disease progression (TTP) (Phase I) Progression-free survival (PFS) (Phase II) Overall survival (OS) (Phase II) True objective response rate (Phase II) Changes of EGFR expression and serum markers over time (Phase II) Patterns of gene expression data (Phase II)                                                                                                                               | Phase 1         | 30  | September 2002    | June 6, 2014     |
| EGFR inhibitors | NCT00258960 | Caelyx, Cyclophosphamide and Herceptin in Patients With Metastatic                                                                                                               | Completed | Breast Cancer                                                                                                                                                                                                                                                                                                                                                                                                                                                                                                                                                                                                                                                                                                                                                                                                                                                                                                                                                                                                                                                                                                                                                                                                                                                                                                     | Drug: Liposomal Doxorubicin Drug: Cyclophosphamide Drug: Trastuzumab                                                                                                                     | Objective Response Rate (ORR) Time to Progression (TTP) Time to Treatment Failure (TTF) Response Duration Overall Survival (OS)                                                                                                                                                                                                                                                                                                                                                                                                                                                                                               | Phase 2         | 49  | February 15, 2006 | July 15, 2019    |
| EGFR inhibitors | NCT00820417 | Pharmacokinetic/Pharmacodynamic (PK/PD) Study of the Combination Cetuximab/Gefitinib                                                                                             | Completed | Colorectal Cancer Head and Neck Cancer Non Small Cell Lung Cancer (NSCLC)                                                                                                                                                                                                                                                                                                                                                                                                                                                                                                                                                                                                                                                                                                                                                                                                                                                                                                                                                                                                                                                                                                                                                                                                                                         | Drug: Cetuximab/Gefitinib combination and/or monotherapy                                                                                                                                 | The primary objective of the study is to determine the maximum tolerated dose (MTD) and the recommended dose (RD) of the combination intravenous Cetuximab/oral Gefitinib. To determine the pharmacokinetic (PK) parameters of the combination Cetuximab/Gefitinib To determine the pharmacogenomic profile of study patients and to correlate the different profiles with efficacy To determine the possible correlation between activity and the polymorphisms of the EGFR measured in the blood and in the primary tumour To assess the possible immune response related to cetuximab To estimate signs                    | Phase 1         | 63  | June 2004         | January 12, 2009 |
| EGFR inhibitors | NCT00314262 | Phase I/II Study of Chemoprevention With EGFR and COX-2 Inhibitor                                                                                                                | Completed | Precancerous Conditions                                                                                                                                                                                                                                                                                                                                                                                                                                                                                                                                                                                                                                                                                                                                                                                                                                                                                                                                                                                                                                                                                                                                                                                                                                                                                           | Drug: Erlotinib & Celecoxib                                                                                                                                                              | Dose Escalation and Toxicity: Toxicities Including Grades 1 to 4 Clinical Outcome: Documented Progression Clinical Outcome: Progression to a Higher-grade Dysplasia or                                                                                                                                                                                                                                                                                                                                                                                                                                                        | Phase 1 Phase 1 | 17  | October 2006      | October 24, 2014 |

|                 |             |                                                                                                                                           |           |                                                                                                                                                                                                                                                                                                 |                                                                                                 |                                                                                                                                                                                                                                                                                                                                                                                                                                                                                                                                                                                                                                                                                                                                                                                                                                                                                                                                                                                                                                                                                                                                                                                                                                                                                                                                                                                                                                                                                                         |         |      |                  |                    |
|-----------------|-------------|-------------------------------------------------------------------------------------------------------------------------------------------|-----------|-------------------------------------------------------------------------------------------------------------------------------------------------------------------------------------------------------------------------------------------------------------------------------------------------|-------------------------------------------------------------------------------------------------|---------------------------------------------------------------------------------------------------------------------------------------------------------------------------------------------------------------------------------------------------------------------------------------------------------------------------------------------------------------------------------------------------------------------------------------------------------------------------------------------------------------------------------------------------------------------------------------------------------------------------------------------------------------------------------------------------------------------------------------------------------------------------------------------------------------------------------------------------------------------------------------------------------------------------------------------------------------------------------------------------------------------------------------------------------------------------------------------------------------------------------------------------------------------------------------------------------------------------------------------------------------------------------------------------------------------------------------------------------------------------------------------------------------------------------------------------------------------------------------------------------|---------|------|------------------|--------------------|
| EGFR inhibitors | NCT00154102 | Cetuximab Combined With Irinotecan in First-line Therapy for Metastatic Colorectal Cancer (CRYSTAL)                                       | Completed | Epidermal Growth Factor Receptor (EGFR) Expressing Metastatic Colorectal Cancer                                                                                                                                                                                                                 | Drug: Cetuximab Drug: FOLFIRI (5-Fluorouracil, Folinic acid, Irinotecan)                        | Progression-free Survival (PFS) Time - Independent Review Committee (IRC) Assessments Progression-free Survival Time (Chinese V-Ki-ras2 Kirsten Rat Sarcoma Viral Oncogene Homolog (KRAS) Wild-Type Population) - Independent Review Committee (IRC) Assessments Progression-free Survival Time (KRAS Mutant Population) - Independent Review Committee (IRC) Assessments Overall Survival Time (OS) Overall Survival Time (KRAS Wild-Type Population) Overall Survival Time (KRAS Mutant Population) Best Overall Response Rate - Independent Review Committee (IRC) Assessments Best Overall Response Rate (KRAS Wild-Type Population) - Independent Review Committee (IRC) Assessments Best Overall Response Rate (KRAS Mutant Population) - Independent Review Committee (IRC) Assessments Disease Control Rate - Independent Review Committee (IRC) Assessments Duration of Response - Independent Review Committee (IRC) Assessments Participants With No Residual Tumor After Metastatic Surgery Quality of Life (QOL) Assessment European Organisation for the Research and Treatment of Cancer (EORTC) QLQ-C30 Global Health Status Quality of Investigator-assessed Duration of Progression-free Survival Percentage of Responders as Assessed by the Investigator Percentage of Participants With Disease Control Duration of Response Overall Survival Safety: Incidence of Adverse Events Quality of Life: Functional Assessment of Chronic Illness Therapy - Lung (FACIT-L) Questionnaire | Phase 3 | 1221 | May 2004         | January 30, 2017   |
| EGFR inhibitors | NCT01342965 | A Study of Erlotinib (Tarceva) Versus Gemcitabine/Cisplatin as First-line Treatment in Patients With Non-small Cell Lung Cancer With EGFR | Completed | Non-Small Cell Lung Cancer                                                                                                                                                                                                                                                                      | Drug: Erlotinib Drug: Chemotherapy                                                              | Investigator-assessed Duration of Progression-free Survival Percentage of Responders as Assessed by the Investigator Percentage of Participants With Disease Control Duration of Response Overall Survival Safety: Incidence of Adverse Events Quality of Life: Functional Assessment of Chronic Illness Therapy - Lung (FACIT-L) Questionnaire                                                                                                                                                                                                                                                                                                                                                                                                                                                                                                                                                                                                                                                                                                                                                                                                                                                                                                                                                                                                                                                                                                                                                         | Phase 3 | 217  | March 2011       | February 24, 2015  |
| EGFR inhibitors | NCT02285361 | GIOTRIF rPMS in Korean Patients With NSCLC                                                                                                | Completed | Carcinoma, Non-Small-Cell Lung                                                                                                                                                                                                                                                                  | Drug: GIOTRIF 20mg Drug: GIOTRIF 40mg Drug: GIOTRIF 30mg                                        | Percentage of Participants With Adverse Drug Reactions (ADRs) Progression-Free Survival (PFS) Rate at 48 Weeks Percentage of Participants With Best Response Overall                                                                                                                                                                                                                                                                                                                                                                                                                                                                                                                                                                                                                                                                                                                                                                                                                                                                                                                                                                                                                                                                                                                                                                                                                                                                                                                                    |         | 1272 | October 31, 2014 | February 24, 2021  |
| EGFR inhibitors | NCT00148798 | Study of Cisplatin/Vinorelbine +/- Cetuximab as First-line Treatment of Advanced Non Small Cell Lung Cancer (FLEX)                        | Completed | Non Small Cell Lung Cancer (NSCLC)                                                                                                                                                                                                                                                              | Drug: cetuximab + cisplatin + vinorelbine Drug: cisplatin + vinorelbine                         | Overall Survival Time (OS) Progression-free Survival Time Best Overall Response Rate Disease Control Rate Quality of Life (QOL) Assessment European Organisation for the Research and Treatment of Cancer (EORTC) QLQ-C30 Global Health Status Quality of Life Assessment (EORTC QLQ-C30) Social Functioning A Population Pharmacokinetic (PK) Analysis for Cetuximab in Non-Small Cell Lung Cancer (NSCLC) - Serum Cetuximab Concentrations Safety - Number of Patients Experiencing Any Adverse Event                                                                                                                                                                                                                                                                                                                                                                                                                                                                                                                                                                                                                                                                                                                                                                                                                                                                                                                                                                                                 | Phase 3 | 1861 | October 2004     | June 25, 2014      |
| EGFR inhibitors | NCT00400374 | Secondary Primary Tumor Prevention With EGFR, OSI-774, and Cyclooxygenase-2                                                               | Completed | Head and Neck Cancer                                                                                                                                                                                                                                                                            | Drug: Erlotinib Drug: Celecoxib                                                                 | Define biologic dose of Erlotinib and Celecoxib in Erlotinib plus Celecoxib in patients with early stage (I/II) SCCHN. Improve overall survival rate by reducing SPTs and recurrence with combination of Erlotinib and Celecoxib. Assess tolerability and toxicity associated with combination of Erlotinib and toxicity associated with combination of Erlotinib and Celecoxib for patients with early stage (I/II) SCCHN.                                                                                                                                                                                                                                                                                                                                                                                                                                                                                                                                                                                                                                                                                                                                                                                                                                                                                                                                                                                                                                                                             | Phase 1 | 10   | August 2007      | March 15, 2018     |
| EGFR inhibitors | NCT00049543 | Gefitinib in Treating Patients With Stage IB, II, or IIIA Non-small Cell Lung Cancer That Was Completely Removed by Surgery               | Completed | Adenocarcinoma of the Lung Adenosquamous Cell Lung Cancer Bronchoalveolar Cell Lung Cancer Large Cell Lung Cancer Squamous Cell Lung Cancer Stage IB Non-small Cell Lung Cancer Stage IIA Non-small Cell Lung Cancer Stage IIB Non-small Cell Lung Cancer Stage IIIA Non-small Cell Lung Cancer | Drug: gefitinib Other: placebo Other: laboratory biomarker analysis                             | Overall Survival Disease Free Survival Incidence of Toxicities Graded Using the NCI Common Terminology Criteria for Adverse Events Version 3.0                                                                                                                                                                                                                                                                                                                                                                                                                                                                                                                                                                                                                                                                                                                                                                                                                                                                                                                                                                                                                                                                                                                                                                                                                                                                                                                                                          | Phase 3 | 503  | September 2002   | January 1, 2015    |
| EGFR inhibitors | NCT00047346 | Erlotinib in Treating Patients With Unresectable Liver Cancer and Liver Dysfunction                                                       | Completed | Adult Primary Hepatocellular Carcinoma Advanced Adult Primary Liver Cancer Localized Unresectable Adult Primary Liver Cancer Recurrent Adult Primary Liver Cancer                                                                                                                               | Drug: erlotinib hydrochloride Other: pharmacological study Other: laboratory biomarker analysis | Dose-limiting toxicity and maximum tolerated dose as measured by NCI CTCAE v3.0 continuously Pharmacokinetic (PK) and pharmacodynamic profile, as measured by Cmax, Tmax, AUC0-24, AUC0-infinity, C/IF, T1/2, accumulation ratio, and C5min Objective response rates (partial, complete, stable disease), as measured by CT scans using                                                                                                                                                                                                                                                                                                                                                                                                                                                                                                                                                                                                                                                                                                                                                                                                                                                                                                                                                                                                                                                                                                                                                                 | Phase 1 | 24   | August 2002      | January 23, 2013   |
| EGFR inhibitors | NCT00125034 | Oxaliplatin and Cetuximab in First-line Treatment of Metastatic Colorectal Cancer (mCRC)                                                  | Completed | Neoplasm Metastasis Colorectal Cancer                                                                                                                                                                                                                                                           | Biological: Cetuximab Drug: Oxaliplatin                                                         | Best Overall Response Rate - Independent Review Committee (IRC) Best Overall Response Rate (Chinese V-Ki-ras2 Kirsten Rat Sarcoma Viral Oncogene Homolog (KRAS) Wild-Type Population) Best Overall Response Rate (KRAS Mutant Population) Progression-free Survival Time Progression-free Survival Time (KRAS Wild-Type Population) Progression-free Survival Time (KRAS Mutant Population) Overall Survival Time Overall Survival Time (KRAS Wild-Type Population) Overall Survival Time (KRAS Mutant Population) Participants With No Residual Tumor After Metastatic Surgery Disease Control Rate (Cut Off Date 4 August 2006) Duration of Response Safety - Number of Patients Experiencing Any Adverse Event                                                                                                                                                                                                                                                                                                                                                                                                                                                                                                                                                                                                                                                                                                                                                                                       | Phase 2 | 344  | July 2005        | August 7, 2014     |
| EGFR inhibitors | NCT01544179 | A Study of IRESSA Treatment Beyond Progression in Addition to Chemotherapy Versus Chemotherapy Alone                                      | Completed | Non-Small Cell Lung Cancer                                                                                                                                                                                                                                                                      | Drug: Gefitinib Drug: Placebo Drug: Pemetrexed Drug: Cisplatin                                  | Progression-Free Survival (Site Read, Investigator Assessment) Median Progression-Free Survival (Site Read, Investigator Assessment) Overall Survival (OS) Median Overall Survival (OS) at Time of PFS Analysis Objective Response Rate (ORR) (Site Read Data) Disease Control Rate (DCR) Improvement in Trial Outcome Index Time to Worsening in Trial Outcome Index Improvement in FACT-L Total Score Time to Worsening in FACT-L Total Score Improvement in Lung Cancer Subscale Time to Worsening in Lung Cancer Subscale                                                                                                                                                                                                                                                                                                                                                                                                                                                                                                                                                                                                                                                                                                                                                                                                                                                                                                                                                                           | Phase 3 | 265  | March 15, 2012   | September 25, 2020 |
| EGFR inhibitors | NCT01530334 | Iressa Re-Challenge in Advanced NSCLC EGFR M+ Patients Who Responded to Gefitinib USed as 1st Line or Previous Treatment                  | Completed | Lung Cancer                                                                                                                                                                                                                                                                                     | Drug: Gefitinib 250mg                                                                           | Objective Response Rate Clinical Benefit Rate Progression Free Survival Overall Survival (OS) Treatment Duration With Gefitinib Time to Worsening of Disease Related Symptoms                                                                                                                                                                                                                                                                                                                                                                                                                                                                                                                                                                                                                                                                                                                                                                                                                                                                                                                                                                                                                                                                                                                                                                                                                                                                                                                           | Phase 2 | 61   | July 2012        | February 23, 2016  |
| EGFR inhibitors | NCT00404924 | ZD6474 (ZACTIMA™) Phase III Study in EGFR Failures                                                                                        | Completed | Non-Small-Cell Lung Carcinoma                                                                                                                                                                                                                                                                   | Drug: ZD6474 (vandetanib) Other: Best Supportive Care                                           | Overall Survival (OS) Progression-Free Survival (PFS) Objective Response Rate (ORR) Disease Control Rate (DCR) Duration of Response (DoR) Time to Deterioration of Disease-related Symptoms (TDS) by Questionnaire - the Lung Cancer Subscale (LCS) a Selection of the FACT-L Focusing on Symptoms of Lung Cancer Plus Pain and Fatigue                                                                                                                                                                                                                                                                                                                                                                                                                                                                                                                                                                                                                                                                                                                                                                                                                                                                                                                                                                                                                                                                                                                                                                 | Phase 3 | 1140 | November 2006    | September 30, 2016 |

|                 |             |                                                                                                                                                                                           |           |                                              |                                                                                                                                     |                                                                                                                                                                                                                                                                                                                                                                                                                                                                                                                                                                                                                                                                                                                                                                                                                                                                                                                                                                                                                                                                                                                                                                                                                                                                                                                                                                                                                                                                                        |                |      |                   |                   |
|-----------------|-------------|-------------------------------------------------------------------------------------------------------------------------------------------------------------------------------------------|-----------|----------------------------------------------|-------------------------------------------------------------------------------------------------------------------------------------|----------------------------------------------------------------------------------------------------------------------------------------------------------------------------------------------------------------------------------------------------------------------------------------------------------------------------------------------------------------------------------------------------------------------------------------------------------------------------------------------------------------------------------------------------------------------------------------------------------------------------------------------------------------------------------------------------------------------------------------------------------------------------------------------------------------------------------------------------------------------------------------------------------------------------------------------------------------------------------------------------------------------------------------------------------------------------------------------------------------------------------------------------------------------------------------------------------------------------------------------------------------------------------------------------------------------------------------------------------------------------------------------------------------------------------------------------------------------------------------|----------------|------|-------------------|-------------------|
| EGFR inhibitors | NCT00003809 | Cisplatin With or Without Monoclonal Antibody Therapy in Treating Patients With Metastatic or Recurrent Head and Neck Cancer                                                              | Completed | Head and Neck Cancer                         | Biological: cetuximab Drug: cisplatin                                                                                               |                                                                                                                                                                                                                                                                                                                                                                                                                                                                                                                                                                                                                                                                                                                                                                                                                                                                                                                                                                                                                                                                                                                                                                                                                                                                                                                                                                                                                                                                                        | Phase 3        |      | June 1999         | August 23, 2013   |
| EGFR inhibitors | NCT00615758 | Erlotinib as 1st Line Treatment in NSCLC Stage IIIB/IV                                                                                                                                    | Completed | Non Small Cell Lung Cancer                   | Drug: Erlotinib                                                                                                                     | Overall Response Rate Overall Survival Time to Tumor Progression Quality of life assessment Toxicity assesment                                                                                                                                                                                                                                                                                                                                                                                                                                                                                                                                                                                                                                                                                                                                                                                                                                                                                                                                                                                                                                                                                                                                                                                                                                                                                                                                                                         | Phase 2        | 50   | October 2006      | December 15, 2009 |
| EGFR inhibitors | NCT00326495 | BAY 43-9006 Plus Cetuximab to Treat Colorectal Cancer                                                                                                                                     | Completed | Metastatic Colorectal Cancer                 | Drug: Cetuximab Drug: BAY 43-9006                                                                                                   | Overall Rate of Response Count of Participants With Adverse Events                                                                                                                                                                                                                                                                                                                                                                                                                                                                                                                                                                                                                                                                                                                                                                                                                                                                                                                                                                                                                                                                                                                                                                                                                                                                                                                                                                                                                     | Phase 2        | 51   | May 10, 2006      | July 24, 2017     |
| EGFR inhibitors | NCT01901146 | Efficacy and Safety Study of ABP 980 Compared With Trastuzumab in Women With HER2-positive Early Breast Cancer                                                                            | Completed | Breast Cancer                                | Drug: ABP 980 Drug: Trastuzumab Drug: Paclitaxel Procedure: Lumpectomy or Mastectomy with Sentinel Node or Axillary Node Dissection | Percentage of Participants With a Pathologic Complete Response Percentage of Participants With a Pathologic Complete Response in Breast Tissue Only Percentage of Participants With a Pathologic Complete Response in Breast Tissue and Axillary Lymph Nodes and Absence of DCIS                                                                                                                                                                                                                                                                                                                                                                                                                                                                                                                                                                                                                                                                                                                                                                                                                                                                                                                                                                                                                                                                                                                                                                                                       | Phase 3        | 725  | April 29, 2013    | August 7, 2019    |
| EGFR inhibitors | NCT03370770 | Afatinib Osimertinib Sequencing NIS                                                                                                                                                       | Completed | Carcinoma, Non-Small-Cell Lung               | Drug: Afatinib Drug: Osimertinib                                                                                                    | Time on Treatment With Afatinib (G(I)Otrif®) Followed by Osimertinib The Percentage of Participants With Different Types of Mutations After Categorisation                                                                                                                                                                                                                                                                                                                                                                                                                                                                                                                                                                                                                                                                                                                                                                                                                                                                                                                                                                                                                                                                                                                                                                                                                                                                                                                             |                | 204  | December 28, 2017 | December 24, 2020 |
| EGFR inhibitors | NCT03157310 | Bone Metastasis on the Survival of Gefitinib Effective Patients                                                                                                                           | Completed | Overall Survival, Non-small Cell Lung Cancer | Drug: Gefitinib                                                                                                                     | Overall survival of patients Survival of patients with both bone metastasis and brain metastasis                                                                                                                                                                                                                                                                                                                                                                                                                                                                                                                                                                                                                                                                                                                                                                                                                                                                                                                                                                                                                                                                                                                                                                                                                                                                                                                                                                                       | Not Applicable | 265  | May 1, 2009       | May 17, 2017      |
| EGFR inhibitors | NCT00045487 | Erlotinib in Treating Patients With Advanced Kidney Cancer                                                                                                                                | Completed | Kidney Cancer                                | Drug: OSI-774                                                                                                                       | Number of Patients With Anti-tumor Activity After Taking OSI-774.                                                                                                                                                                                                                                                                                                                                                                                                                                                                                                                                                                                                                                                                                                                                                                                                                                                                                                                                                                                                                                                                                                                                                                                                                                                                                                                                                                                                                      | Phase 2        | 41   | June 2002         | January 27, 2014  |
| EGFR inhibitors | NCT00371345 | Study of Dasatinib (BMS-354825) in Patients With Advanced Estrogen/Progesterone Receptor-positive (ER+/PR+) or Her2/Neu-positive (Her2/Neu+) Breast Cancer                                | Completed | Breast Cancer Metastasis                     | Drug: Dasatinib Drug: Dasatinib 100 mg                                                                                              | Number of Participants With Objective Response Percentage of Participants With Objective Response Best Overall Response Number of Response-evaluable Participants With Disease Control (DCR) Percentage of Response-evaluable Participants With Disease Control (DCR) Number of Participants Who Progressed Median Progression Free Survival (PFS) Percentage of Participants With Progression-free Survival (PFS) at Weeks 9, 17, and 25 Duration Of Objective Response Number of Participants With Death, Adverse Events (AEs), and AEs Leading to Discontinuation Number of Participants With On-study CTCAE Version 3.0 Grade 3-4 Laboratory Abnormalities Number of Participants With Serious AEs (SAEs), Drug-related AEs, Drug-related SAEs, and Drug-Related Grade 3 AEs Number Of Participants With Notable Drug-related AEs Pharmacokinetics (PK): Plasma Concentration of Dasatinib at Week 3 PK: Plasma Concentration of Dasatinib at Week 7 or Week 9 Pharmacodynamics: Percent Change From Baseline In Plasma Level of Collagen Type IV at Week 3 in Participants With and Without DCR Pharmacodynamics: Percent Change From Baseline In Plasma Level of Collagen Type IV at Week 5 in Participants With and Without DCR Pharmacodynamics: Percent Change From Baseline In Plasma Level of VEGFR2 at Week 3 in Participants With and Without DCR Pharmacodynamics: Percent Change From Baseline In Plasma Level of VEGFR2 at Week 5 in Participants With and Without DCR | Phase 2        | 92   | December 28, 2006 | April 26, 2011    |
| EGFR inhibitors | NCT00104091 | Safety and Efficacy Study to Treat Recurrent Grade 4 Malignant Brain Tumors                                                                                                               | Completed | Glioblastoma Multiforme                      | Drug: TP-38                                                                                                                         | Evaluate TP-38 at a 100 nanograms/mL concentration for sufficient activity Efficacy parameters including time to progression, safety, and survival                                                                                                                                                                                                                                                                                                                                                                                                                                                                                                                                                                                                                                                                                                                                                                                                                                                                                                                                                                                                                                                                                                                                                                                                                                                                                                                                     | Phase 2        | 56   | December 2004     | May 23, 2011      |
| EGFR inhibitors | NCT01480674 | An Observational Study of Patients With HER2-Positive Metastatic or Locally Advanced Breast Cancer Treated With Herceptin (Trastuzumab) in 1st Line and Without Progression For 3 Years   | Completed | Breast Cancer                                | Drug: Trastuzumab                                                                                                                   | Tumor Hormone Receptor Status of Participants Without Progression Percentage of Participants With Prevalence of Bone Metastases Without Progression for at Least 3 Years After the Beginning of 1st Line Herceptin Treatment Progression-free Survival Time to Progression Overall Survival Dosage Schedule of Herceptin Treatment Number of Participants With Antineoplastic Treatment in Combination With Trastuzumab and After Discontinuation of Trastuzumab Treatment Number of Participants With Any Adverse Events and Serious Adverse Events The Duration of Treatment of Trastuzumab                                                                                                                                                                                                                                                                                                                                                                                                                                                                                                                                                                                                                                                                                                                                                                                                                                                                                          |                | 160  | March 28, 2011    | August 16, 2017   |
| EGFR inhibitors | NCT02831842 | A Real World Study to Evaluate Effectiveness of Avastin (Bevacizumab) for First Line Treatment of Patients With Metastatic Colorectal Cancer and Known KRAS                               | Completed | Colorectal Cancer                            | Drug: Anti-EGFR-Containing Regimen Drug: Bevacizumab-containing regimen Drug: Chemotherapy                                          | Overall Survival (OS) in Participants With mCRC and a Documented KRAS Mutation who Received Bevacizumab-Containing Treatment or Chemotherapy Alone in Routine Clinical Practice OS in Participants With mCRC and a Documented KRAS Wild Type Status who Received Bevacizumab-Containing Treatment or Anti-EGFR Treatment in Routine Clinical Practice                                                                                                                                                                                                                                                                                                                                                                                                                                                                                                                                                                                                                                                                                                                                                                                                                                                                                                                                                                                                                                                                                                                                  |                | 4278 | June 9, 2016      | January 26, 2018  |
| EGFR inhibitors | NCT01514877 | Icotinib Combined With Whole Brain Radiotherapy in Treating Multiple Brain Metastases From Non-Small Cell Lung Cancer                                                                     | Completed | Lung Cancer Metastatic Cancer                | Drug: Icotinib                                                                                                                      | partial response rate of intracranial lesions Progression-free survival overall survival partial response rate of extracranial lesions Health-related quality of life safety and tolerability the relationship between Progression-Free Survival and EGFR mutation status                                                                                                                                                                                                                                                                                                                                                                                                                                                                                                                                                                                                                                                                                                                                                                                                                                                                                                                                                                                                                                                                                                                                                                                                              | Phase 2        | 20   | January 2012      | July 23, 2014     |
| EGFR inhibitors | NCT00343083 | Evaluation of Cetuximab (ERBITUX) and Concurrent Carboplatin, Paclitaxel & Radiotherapy in the Management of Patients With Advanced Locoregional Squamous Cell Carcinomas of the Head and | Completed | Cancer of Head and Neck                      | Drug: Erbitux, Paclitaxel & Carboplatin Radiation: Radiation                                                                        | The Primary Endpoint is the Local Regional Control Rate Assessed 3 Months Post Completion of Radiation Therapy. Local Regional Control at 2 Years Overall Survival and Disease-free Survival Pathological Response to Cetuximab Percentage of Participants With Grade 3 Toxicities of Cetuximab Clinical Complete Response Rate of This Regimen in the Population                                                                                                                                                                                                                                                                                                                                                                                                                                                                                                                                                                                                                                                                                                                                                                                                                                                                                                                                                                                                                                                                                                                      | Phase 2        | 43   | December 2004     | August 19, 2019   |

|                 |             |                                                                                                                    |           |                                                                                                                                                                                                                         |                                                                                                                                                                   |                                                                                                                                                                                                                                                                                                                                                                                                                                                                                                                                                                                                                              |                 |     |                    |                   |
|-----------------|-------------|--------------------------------------------------------------------------------------------------------------------|-----------|-------------------------------------------------------------------------------------------------------------------------------------------------------------------------------------------------------------------------|-------------------------------------------------------------------------------------------------------------------------------------------------------------------|------------------------------------------------------------------------------------------------------------------------------------------------------------------------------------------------------------------------------------------------------------------------------------------------------------------------------------------------------------------------------------------------------------------------------------------------------------------------------------------------------------------------------------------------------------------------------------------------------------------------------|-----------------|-----|--------------------|-------------------|
| EGFR inhibitors | NCT00551850 | A Safety Study of an Oral EGFR Inhibitor, AV-412, Administered Three Times Weekly in Advanced Solid Tumor Patients | Completed | Advanced Cancer Refractory Cancer                                                                                                                                                                                       | Drug: AV-412                                                                                                                                                      | Evaluate the safety, tolerability, dose-limiting toxicities (DLT) and maximum tolerated dose (MTD) of AV-412 administered orally 3 times weekly and once weekly in subjects with relapsed or refractory solid tumor malignancies. Characterize the pharmacokinetic (PK) profile of AV-412 Determine the effect of AV-412 on global and targeted gene expression patterns in blood from all subjects enrolled in the MTD expansion cohorts Evaluate the                                                                                                                                                                       | Phase 1         | 37  | October 2007       | October 4, 2011   |
| EGFR inhibitors | NCT01534585 | Safety and Efficacy Study of Icotinib With Intensity-modulated Radiotherapy in Nasopharyngeal Carcinoma            | Completed | Nasopharyngeal Carcinoma                                                                                                                                                                                                | Drug: Icotinib Radiation: intensity-modulated radiotherapy Drug: Paclitaxel and Cisplatin Other: Quality of life Genetic: Epidermal growth factor receptor status | Phase I: the maximum tolerated dose of Icotinib in combination with IMRT for NPC Phase II: 2 years locoregional control rate The overall response rate (complete and partial response) The acute and late toxicity profile associated with the study regimen The duration of control of locoregional disease Overall survival, disease-free survival, and distant relapse rates EGFR status in tissue and blood before treatment                                                                                                                                                                                             | Phase 1 Phase 2 | 48  | February 2012      | April 17, 2018    |
| EGFR inhibitors | NCT00650572 | A Study of ARRY-380 in Patients With Advanced HER2+ Cancer                                                         | Completed | Cancer                                                                                                                                                                                                                  | Drug: ARRY-380, HER2 inhibitor; oral                                                                                                                              | Characterize the safety profile of the study drug in terms of adverse events, clinical laboratory tests and electrocardiograms. Establish the maximum tolerated dose (MTD) of the study drug. Characterize the pharmacokinetics of the study drug. Assess amplification/expression of HER2 in archival and tumor tissues. Assess changes in tumor markers. Assess the efficacy of study drug in terms of tumor response and duration of response. Assess expression of growth factor pathway proteins in archival and tumor tissues.                                                                                         | Phase 1         | 50  | May 2008           | May 7, 2020       |
| EGFR inhibitors | NCT01858389 | A Study Of Dacomitinib (PF-00299804) In Patients With Advanced Non-Small Cell Lung Cancer                          | Completed | Non-small Cell Lung Cancer                                                                                                                                                                                              | Drug: Dacomitinib                                                                                                                                                 | Best Overall Response (BOR) in Participants With T790M Mutation Objective Response Rate (ORR) in Participants With T790M Mutation Disease Control Rate (DCR) for Participants With T790M Mutation Duration of Response in Participants With T790M Mutation Progression-free Survival at 4 Months Maximum Plasma Concentration (Cmax) for Dacomitinib and PF-05199265 Time to Maximum Plasma Concentration (Tmax) for Dacomitinib and PF-05199265 Changes From Time-matched Baseline in Adjusted Fridericia Corrected QT Interval (QTcF) on Echocardiogram (ECG)                                                              | Phase 2         | 41  | July 2013          | July 18, 2017     |
| EGFR inhibitors | NCT00356889 | Bevacizumab and Erlotinib Hydrochloride in Treating Patients With Metastatic or Unresectable Biliary Tumors        | Completed | Cholangiocarcinoma of the Extrahepatic Bile Duct Cholangiocarcinoma of the Gallbladder Gastrointestinal Cancer Recurrent Extrahepatic Bile Duct Cancer Recurrent Gallbladder Cancer Unresectable Extrahepatic Bile Duct | Drug: erlotinib hydrochloride Biological: bevacizumab                                                                                                             | Number of Confirmed Tumor Responses. Survival Time Time to Disease Progression Duration of Response                                                                                                                                                                                                                                                                                                                                                                                                                                                                                                                          | Phase 2         | 56  | May 2006           | May 28, 2014      |
| EGFR inhibitors | NCT02444819 | Phase II Trial to Evaluate the Efficacy and Safety of HM61713 as the 1st-line NSCLC Anticancer Therapy             | Completed | Non Small Cell Lung Cancer                                                                                                                                                                                              | Drug: HM61713                                                                                                                                                     | Objective response rate Progression-free survival Disease control rate overall survival Time to progression Maximum decrease in tumor size Quality of life questionnaire                                                                                                                                                                                                                                                                                                                                                                                                                                                     | Phase 2         | 33  | March 2015         | April 24, 2018    |
| EGFR inhibitors | NCT01290471 | Study to Assess the Safety and Tolerability of U3-1565 in Subjects With Advanced Solid Malignant Tumors            | Completed | Advanced Solid Malignant Tumors Advanced Ovarian Cancer                                                                                                                                                                 | Drug: U3-1565                                                                                                                                                     | Number (percent) of subjects experiencing adverse events (AEs) after treatment with U3-1565 determine the maximum tolerated dose (MTD) or tolerability of maximum administered dose (MAD). Greatest percent reduction in the sum of longest diameters (SLD) of measurable tumors, if applicable, after U3 1565 treatment Changes in pharmacodynamic biomarkers in blood and other body fluid specimens Changes in tumor perfusion and vascularity after U3-1565 treatment using Dynamic Contrast Enhanced                                                                                                                    | Phase 1         | 36  | January 2011       | May 19, 2014      |
| EGFR inhibitors | NCT01039948 | A Phase 1b/2 Study in Asian Subjects With Non-Small Cell Lung Cancer                                               | Completed | Carcinoma, Non-Small Cell-Lung Lung Neoplasms Lung Cancer Respiratory Tract Neoplasms                                                                                                                                   | Biological: AV-299 + gefitinib Drug: Gefitinib                                                                                                                    | Phase 1b: Dose Limiting Toxicity and Recommended Phase II Dose Phase 2: Objective Response Rate Phase 1b: Cmax, Tmax, AUC, t1/2, clearance, and Vd Phase 2: Progression Free Survival, Overall Survival, Safety                                                                                                                                                                                                                                                                                                                                                                                                              | Phase 1 Phase 2 | 203 | December 2009      | April 8, 2015     |
| EGFR inhibitors | NCT00632723 | IRESSA™ (Gefitinib) in Breast Cancer Patients                                                                      | Completed | Breast Cancer                                                                                                                                                                                                           | Drug: gefitinib (IRESSA™, ZD1839)                                                                                                                                 | Objective tumour response (complete + partial response) based on Union International Contre le Cancer (UICC) Criteria Clinical benefit (CR + PR + SD > 24 wks) Frequency and severity of adverse events (AEs) Progression-free survival Duration of response                                                                                                                                                                                                                                                                                                                                                                 | Phase 2         | 54  | April 2001         | April 22, 2009    |
| EGFR inhibitors | NCT00158782 | Study Of Safety And Tolerability Of GW786034 Given With Lapatinib In Cancer Patients                               | Completed | Carcinoma, Renal Cell                                                                                                                                                                                                   | Drug: GW786034 Drug: lapatinib                                                                                                                                    | Changes in pre and post treatment lab values and monitoring/reporting AES.AE's throughout study Labs every wk first cycle:day 1 subsequent cycles find max conc of drugs in blood and time it occurs find out if drugs are taken up by the body, how much/for how long find out if drugs affect the size of the tumor. Blood taken day 15, 22 or 37 and tumor                                                                                                                                                                                                                                                                | Phase 1         | 75  | September 28, 2004 | November 17, 2017 |
| EGFR inhibitors | NCT01097642 | Neo-Adjuvant Study in Triple Negative Breast Cancer Patients                                                       | Completed | Breast Cancer                                                                                                                                                                                                           | Drug: Cetuximab Drug: Ixabepilone                                                                                                                                 | Complete Response Rate Overall Objective Response Rate Safety and toxicity of both treatment regimens                                                                                                                                                                                                                                                                                                                                                                                                                                                                                                                        | Phase 2         | 40  | October 2008       | May 15, 2020      |
| EGFR inhibitors | NCT00619424 | A Phase I Study Of Pazopanib With Either Erlotinib Or Pemetrexed In Patients With Advanced Solid Tumors            | Completed | Lung Cancer, Non-Small Cell                                                                                                                                                                                             | Drug: pazopanib Drug: erlotinib Drug: pemetrexed                                                                                                                  | MTD regimen for each combination regimen in each arm of the study as determined by an evaluation of AEs and changes in laboratory values. The MTD = highest dosing regimen that results in dose limiting toxicity in <= 1 of 6 patients. Pharmacokinetic endpoints will be AUC, Cmax, tmax, and t1/2 of pazopanib, erlotinib, and pemetrexed and clearance of pemetrexed. Tumor response using RECIST criteria. Levels of circulating cytokine and angiogenic factors (CAF) biomarkers (such as IL-2, IL-10, VEGF, sVEGFR-2) in plasma will be determined. Pharmacogenetics Endpoint: Genetic variants in candidate genes in | Phase 1         | 58  | November 15, 2007  | November 17, 2017 |

|                 |             |                                                                                                                                                                                                 |           |                                                                                                                                                                                                                                              |                                                                                                 |                                                                                                                                                                                                                                                                                                                                                                                                                                                                                                                                                                                                                                                                                                                                                                                                                                                                                                                                                                                                                                                                                                                                                                                                                                                                                                                                                                                                                                                                       |                 |     |                |                   |
|-----------------|-------------|-------------------------------------------------------------------------------------------------------------------------------------------------------------------------------------------------|-----------|----------------------------------------------------------------------------------------------------------------------------------------------------------------------------------------------------------------------------------------------|-------------------------------------------------------------------------------------------------|-----------------------------------------------------------------------------------------------------------------------------------------------------------------------------------------------------------------------------------------------------------------------------------------------------------------------------------------------------------------------------------------------------------------------------------------------------------------------------------------------------------------------------------------------------------------------------------------------------------------------------------------------------------------------------------------------------------------------------------------------------------------------------------------------------------------------------------------------------------------------------------------------------------------------------------------------------------------------------------------------------------------------------------------------------------------------------------------------------------------------------------------------------------------------------------------------------------------------------------------------------------------------------------------------------------------------------------------------------------------------------------------------------------------------------------------------------------------------|-----------------|-----|----------------|-------------------|
| EGFR inhibitors | NCT01674062 | A Study of Perjeta (Pertuzumab) in Combination With Herceptin (Trastuzumab) in Participants With Metastatic Breast Cancer                                                                       | Completed | Breast Cancer                                                                                                                                                                                                                                | Drug: Pertuzumab Drug: Trastuzumab                                                              | Cohorts 1 and 2: Percentage of Participants With a Confirmed Best Overall Response of Complete Response (CR) or Partial Response (PR) According to Response Evaluation Criteria in Solid Tumors (RECIST) Version 1.0 During Dual-Agent Treatment Cohorts 1 and 2: Percentage of Participants With a Confirmed Best Overall Response of CR, PR, or Stable Disease (SD) According to RECIST Version 1.0 During Dual-Agent Treatment Cohort 3: Percentage of Participants With a Confirmed Best Overall Response of CR or PR According to RECIST Version 1.0 During Single-Agent Treatment With Pertuzumab Cohort 3: Percentage of Participants With a Confirmed Best Overall Response of CR, PR, or SD According to RECIST Version 1.0 During Single-Agent Treatment With Pertuzumab Cohorts 1 and 2: Duration of Response According to RECIST Version 1.0 Cohorts 1 and 2: Time to Objective Response According to RECIST Version 1.0 Cohorts 1 and 2: Percentage of Participants With Disease Progression According to RECIST Version 1.0 Cohorts 1 and 2: Time to Progression (TTP) According to RECIST Version 1.0 Cohorts 1 and 2: Progression-Free Survival (PFS) According to RECIST                                                                                                                                                                                                                                                                             | Phase 2         | 95  | May 2006       | August 22, 2016   |
| EGFR inhibitors | NCT00045110 | Erlotinib in Treating Patients With Recurrent Malignant Glioma or Recurrent or Progressive Meningioma                                                                                           | Completed | Adult Anaplastic Astrocytoma Adult Anaplastic Oligodendroglioma Adult Giant Cell Glioblastoma Adult Glioblastoma Adult Gliosarcoma Adult Grade I Meningioma Adult Grade II Meningioma Adult Grade III Meningioma Recurrent Adult Brain Tumor | Drug: erlotinib hydrochloride Other: laboratory biomarker analysis Other: pharmacological study | Number of Dose Limiting Toxicity (DLT) Each Dose Level Phase I Define Maximum Tolerated Dose (MTD) of Erlotinib by Phase 1 Cohorts 6 Months Progression-free Survival in Recurrent Malignant Gliomas (Phase II) Percent of Participants With a Grade 3 or 4 Adverse Events Phase I 1 Year Survival - Phase II Newly Diagnosed GBM Post RT Overall Survival Newly Diagnosed GBM Post RT Response Rate (Complete or Partial Response) Graded Using Modified RECIST Criteria Phase III Percent of Patients With One or More Grade 3-5 Toxicity Described Based on the CTC Severity Grading Phase III Time of Peak Plasma Concentration Per Dose Level Phase I (on Anticonvulsants) - Peak Plasma Concentration Per Dose Level Phase I (on Anticonvulsants) - Estimation of the Area Under the Curve Per Dose Level Phase I (on Anticonvulsants) - Trough Level Per Dose Level Phase I (on Anticonvulsants) - Peak Plasma Concentration Level for Recurrent Patients Not on Enzyme-inducing Antiepileptic Drugs - Phase 2 - Dose 150mg - Time to Peak Plasma Concentration for Recurrent Patients Not on Enzyme-inducing Antiepileptic Drugs - Phase 2 - Dose 150mg - Estimation of Area Under the Curve for Recurrent Patients Not on Enzyme-inducing Antiepileptic Drugs - Phase 2 - Dose 150mg - Trough Level for Recurrent Patients Not on Enzyme-inducing Antiepileptic Drugs - Phase 2 - Dose 150mg - Pharmacokinetics (Plasma) Level for Recurrent Patients Not on | Phase 1 Phase 2 | 136 | August 2002    | August 17, 2017   |
| EGFR inhibitors | NCT00879385 | KRAS Wild-type Metastatic Colorectal Cancer Trial                                                                                                                                               | Completed | Colorectal Cancer                                                                                                                                                                                                                            | Drug: Dacogen™ (decitabine) Drug: Vectibix® (panitumumab)                                       | Evaluate safety & feasibility of sequential use of a DNA methyltransferase (DNMT) inhibitor (decitabine) with targeted biological agent against EGFR (panitumumab) for KRAS wild type tumors in second or third line treatment of colorectal cancer. To examine re-expression or a reduction in promoter methylation in genes involved in tumor suppressor pathways known to be important in colorectal cancer (CRC) or involved in EGFR signaling pathway. Evaluate overall response (OR = CR +PR) according to RECIST criteria at 2, 4, and 6 cycles. Progression free survival, measured as the first evidence of tumor growth from the start of treatment will also be assessed. Measure CEA levels at the beginning of each cycle to examine if they correlate with treatment response or disease progression.                                                                                                                                                                                                                                                                                                                                                                                                                                                                                                                                                                                                                                                   | Phase 1         | 21  | December 2009  | October 31, 2014  |
| EGFR inhibitors | NCT00496652 | DAHANCA 19: The Importance of the EGFR-inhibitor Zolatumumab for the Outcome After Curative Radiotherapy for HNSCC                                                                              | Completed | Cancer of the Head and Neck                                                                                                                                                                                                                  | Radiation: Radiotherapy Drug: Zolatumumab                                                       | Locoregional control after curative intended radiotherapy/chemoradiotherapy +/- zolatumumab Disease-specific survival and overall control Acute and late toxicity                                                                                                                                                                                                                                                                                                                                                                                                                                                                                                                                                                                                                                                                                                                                                                                                                                                                                                                                                                                                                                                                                                                                                                                                                                                                                                     | Phase 3         | 619 | November 2007  | November 25, 2016 |
| EGFR inhibitors | NCT01818947 | Gefitinib Usage and Outcomes in Routine Treatment                                                                                                                                               | Completed | Lung Cancer                                                                                                                                                                                                                                  |                                                                                                 | Assessment of treatment duration, as a surrogate of Clinical Benefit (CB) in a 'Real World' population treated with gefitinib Assessment of Overall Survival (OS) in a 'Real World' population treated with gefitinib Assessment of Overall Survival (OS) in the subgroup of patients of Caucasian ethnicity and in the subgroup of patients treated with gefitinib for at least 3 months Assessment of Treatment duration in the subgroup of patients of Caucasian ethnicity and in the subgroup of patients treated with gefitinib for at least 3 months Characteristics of patients treated with gefitinib for all patients and stratified by whether gefitinib discontinued treatment before or after three months Description of treatment patterns in patients treated with gefitinib (prior chemo, treatment breaks, treatment on discontinuation) Duration of treatment in patients stratified by age, gender,                                                                                                                                                                                                                                                                                                                                                                                                                                                                                                                                                |                 | 157 | June 2013      | January 23, 2014  |
| EGFR inhibitors | NCT00240682 | Study of Cetuximab in Squamous Cell Carcinoma of the Skin                                                                                                                                       | Completed | Skin Diseases Carcinoma, Squamous Cell                                                                                                                                                                                                       | Drug: cetuximab                                                                                 | Disease control rate assessed by CT or MRI Safety profile. Time to disease progression. Overall survival. Duration of response in responder patients at 6 weeks.                                                                                                                                                                                                                                                                                                                                                                                                                                                                                                                                                                                                                                                                                                                                                                                                                                                                                                                                                                                                                                                                                                                                                                                                                                                                                                      | Phase 2         | 37  | October 2005   | February 22, 2012 |
| EGFR inhibitors | NCT00819780 | PEAK: Panitumumab Plus mFOLFOX6 vs. Bevacizumab Plus mFOLFOX6 for First Line Treatment of Metastatic Colorectal Cancer (mCRC) Patients With Wild-Type Kirsten Rat Sarcoma-2 Virus (KRAS) Tumors | Completed | Colon Cancer Colorectal Cancer Rectal Cancer Metastatic Colorectal Cancer                                                                                                                                                                    | Drug: Panitumumab Drug: Bevacizumab Drug: mFOLFOX6                                              | Progression-free Survival (PFS) Overall Survival Percentage of Participants With an Objective Response Duration of Response Time to Disease Progression Time to Initial Objective Response Resection Rate Progression-free Survival (PFS) in Participants With Wild-type Ras Sarcoma Viral Oncogene Homolog (RAS) Progression-free Survival (PFS) in Participants With Wild-type RAS / V-raf Murine Sarcoma Viral Oncogene Homolog B1 (BRAF) Overall Survival in Participants With Wild-type RAS Overall Survival in Participants With Wild-type RAS / BRAF Percentage of Participants With an Objective Response for Participants With Wild-type RAS Percentage of Participants With an Objective Response for Participants With Wild-type RAS / BRAF Number of Participants                                                                                                                                                                                                                                                                                                                                                                                                                                                                                                                                                                                                                                                                                         | Phase 2         | 285 | April 24, 2009 | August 21, 2019   |

|                 |             |                                                                                                                                                           |           |                                                                                                                                     |                                                                                                                                                                                    |                                                                                                                                                                                                                                                                                                                                                                                                                                                                                                                                                                                                                                                                                                                                                 |                 |      |                   |                    |
|-----------------|-------------|-----------------------------------------------------------------------------------------------------------------------------------------------------------|-----------|-------------------------------------------------------------------------------------------------------------------------------------|------------------------------------------------------------------------------------------------------------------------------------------------------------------------------------|-------------------------------------------------------------------------------------------------------------------------------------------------------------------------------------------------------------------------------------------------------------------------------------------------------------------------------------------------------------------------------------------------------------------------------------------------------------------------------------------------------------------------------------------------------------------------------------------------------------------------------------------------------------------------------------------------------------------------------------------------|-----------------|------|-------------------|--------------------|
| EGFR inhibitors | NCT00480584 | A Phase I Trial of Capecitabine in Combination With Gemcitabine and Erlotinib for Advanced Pancreatic                                                     | Completed | Metastatic Pancreatic Carcinoma                                                                                                     | Drug: gemcitabine Drug: capecitabine Drug: erlotinib                                                                                                                               | Maximum Tolerated Dose (MTD) Recommended Phase II Dose (RPTD)                                                                                                                                                                                                                                                                                                                                                                                                                                                                                                                                                                                                                                                                                   | Phase 1         | 20   | April 2007        | November 8, 2012   |
| EGFR inhibitors | NCT00372515 | High Dose Gefitinib for the Treatment of Carcinomatous Meningitis in Adult Patients With Non-Small Cell Lung Cancer and Known or Suspected EGFR Mutations | Completed | Non-Small Cell Lung Cancer                                                                                                          | Drug: Gefitinib                                                                                                                                                                    | To assess the safety of administering gefitinib in doses of 750mg to 1250mg in adult patients with carcinomatous meningitis from non-small cell lung cancer with known or suspected somatic EGFR mutations. To measure the cytologic response rate, response duration, time to neurologic progression, and survival following high dose gefitinib therapy administered on this schedule to measure gefitinib levels with serum and cerebrospinal fluid while on therapy, and to correlate these levels with toxicity, response and survival to examine archived tumors for the presence or absence of EGFR mutations and resistance mutations, and to correlate those mutations with cytologic response, time to neurologic                     | Phase 1         | 7    | June 2006         | January 31, 2018   |
| EGFR inhibitors | NCT00851877 | Nab-Paclitaxel, Cisplatin, and Cetuximab With Concurrent Radiation Therapy for Locally                                                                    | Completed | Head and Neck Cancer                                                                                                                | Biological: Cetuximab Drug: Cisplatin Drug: Nab-Paclitaxel Radiation: intensity-modulated radiation therapy                                                                        | Phase I Maximum Tolerated Dose of Nab-Paclitaxel Phase II 2-year Progression-free Survival Phase II 2-year Local Control Phase II 2-year Overall Survival                                                                                                                                                                                                                                                                                                                                                                                                                                                                                                                                                                                       | Phase 1 Phase 2 | 37   | March 2009        | August 21, 2020    |
| EGFR inhibitors | NCT02370849 | Cisplatin and S-1 With or Without Nimotuzumab in Untreated Advanced Gastric Adenocarcinoma                                                                | Completed | Stomach Neoplasms                                                                                                                   | Drug: nimotuzumab Drug: cisplatin Drug: S-1                                                                                                                                        | Objective response rate as measured by Response Evaluation Criteria in Solid Tumors version 1.1 (RECIST 1.1) Time to progression as measured by RECIST 1.1 Progression-free survival measured by RECIST 1.1 Treatment safety and toxicity as measured by Common Toxicity Criteria for Adverse Effects(CTCAE 3.0)                                                                                                                                                                                                                                                                                                                                                                                                                                | Phase 2         | 2    | October 2009      | February 25, 2015  |
| EGFR inhibitors | NCT01520389 | Safety Study of the Drug MM-151 in Patients With Advanced Solid Tumors Resisting Ordinary Treatment                                                       | Completed | Advanced Solid Tumors Colorectal Cancer Squamous Cell Head and Neck Cancer Non Small Cell Lung Cancer Triple Negative Breast Cancer | Drug: MM-151 Drug: MM-151 + irinotecan                                                                                                                                             | Phase II dose of MM-151 alone and in combination with irinotecan based either on the maximum tolerated dose (MTD) or maximum dose of 18 mg/kg in patients with advanced solid malignancies. Number of dose limiting toxicities (DLTs) within a cohort Adverse event profile of MM-151 alone and in combination with irinotecan Objective response to MM-151 alone and in combination with irinotecan based on RECIST                                                                                                                                                                                                                                                                                                                            | Phase 1         | 112  | January 2012      | March 21, 2018     |
| EGFR inhibitors | NCT00353301 | Erlotinib and Sirolimus for the Treatment of Metastatic Renal Cell                                                                                        | Completed | Renal Cell Carcinoma                                                                                                                | Drug: Erlotinib hydrochloride Drug: Sirolimus                                                                                                                                      | Progression-free Survival Overall Survival                                                                                                                                                                                                                                                                                                                                                                                                                                                                                                                                                                                                                                                                                                      | Phase 2         | 25   | July 2006         | April 14, 2014     |
| EGFR inhibitors | NCT00115765 | PACCE: Panitumumab Advanced Colorectal Cancer Evaluation Study                                                                                            | Completed | Colorectal Cancer                                                                                                                   | Drug: Oxaliplatin Based Chemotherapy Drug: Panitumumab Drug: Irinotecan Based Chemotherapy Drug: Bevacizumab                                                                       | Progression-Free Survival (Oxaliplatin) Objective Tumor Response Through Week 12 (Irinotecan) Overall Survival (Oxaliplatin) Objective Tumor Response Rate (Oxaliplatin) Time to Progression (Oxaliplatin) Time to Treatment Failure (Oxaliplatin) Overall Survival (Irinotecan) Progression-free Survival (Irinotecan) Objective Tumor Response Rate (Irinotecan) Time to Progression (Irinotecan) Time to Treatment                                                                                                                                                                                                                                                                                                                           | Phase 3         | 1053 | June 2005         | October 17, 2018   |
| EGFR inhibitors | NCT01730118 | Ad/HER2/Neu Dendritic Cell Cancer Vaccine Testing                                                                                                         | Completed | Breast Neoplasms Breast Cancer Adenocarcinomas Metastatic Solid Tumors                                                              | Biological: AdHER2/neu DC Vaccine                                                                                                                                                  | Fraction of subjects with cardiac toxicity Increase in anti-HER2/neu antibody concentration or increase in antibody dilution titers ORR by immune related response criteria                                                                                                                                                                                                                                                                                                                                                                                                                                                                                                                                                                     | Phase 1         | 33   | March 2013        | October 27, 2020   |
| EGFR inhibitors | NCT00460265 | Study of Panitumumab Efficacy in Patients With Recurrent and/or Metastatic Head and Neck Cancer                                                           | Completed | Recurrent and/or Metastatic Head and Neck Cancer                                                                                    | Drug: ARM 2 Drug: ARM 1                                                                                                                                                            | Overall Survival Overall Response Rate Duration of Response Time to Progression Time to Response Progression Free Survival                                                                                                                                                                                                                                                                                                                                                                                                                                                                                                                                                                                                                      | Phase 3         | 658  | May 2007          | March 7, 2014      |
| EGFR inhibitors | NCT00547157 | Radiotherapy Plus Panitumumab Compared to Chemoradiotherapy With Unresected, Locally Advanced Squamous Cell Carcinoma of the                              | Completed | Cancer Head and Neck Cancer Oncology Squamous Cell Carcinoma                                                                        | Drug: Panitumumab Drug: Cisplatin                                                                                                                                                  | Local Regional Control Rate at 2 Years Duration of Local Regional Control Progression-free Survival Overall Survival ORR by 6 Months - Central CRR by 6 Months - Central                                                                                                                                                                                                                                                                                                                                                                                                                                                                                                                                                                        | Phase 2         | 152  | November 2007     | March 15, 2017     |
| EGFR inhibitors | NCT00970502 | Erlotinib, Celecoxib and Reirradiation for Recurrent Head and Neck Cancer                                                                                 | Completed | Cancer of the Pharynx Cancer of the Larynx Cancer of the Neck Paranasal Sinus Neoplasms Cancer of the                               | Drug: erlotinib + celecoxib                                                                                                                                                        | Toxicity Clinical Response Locoregional Progression Locoregional Control, Progression-free Survival, Overall Survival and Late Toxicity                                                                                                                                                                                                                                                                                                                                                                                                                                                                                                                                                                                                         | Phase 1 Phase   | 15   | February 2007     | April 10, 2017     |
| EGFR inhibitors | NCT03419403 | UNITE Study: Understanding New Interventions With GBM ThErapy                                                                                             | Completed | Glioblastoma Multiforme                                                                                                             | Drug: Steroid eye drop Drug: Ophthalmic steroid ointment Radiation: Radiation Drug: Temozolomide Drug: depatuzizumab mafodotin Other: cold compress Drug: Vasoconstrictor eye drop | Participants who Require a Change in Ocular Side Effect (OSE) Management Cumulative Dose of Depatuzizumab Mafodotin Change from Baseline In Logarithm of the Minimum Angle of Resolution (LogMAR) Scale after Bandage Contact Lenses (BCL) Intervention Time to OSE Symptom Resolution after Drug Discontinuation (reversibility) Time to BCL Intervention Participants that recover to <3-line decline from Baseline (<= +0.3 LogMAR) in visual acuity after BCL Intervention Corneal Epithelial Adverse Event (CEAE) Grade Time to Re-initiation of Depatuzizumab Mafodotin after Dose Interruption Participants with Depatuzizumab Mafodotin Dose Interruptions due to OSEs Participants with Depatuzizumab Mafodotin Dose Reductions due to | Phase 3         | 40   | July 2018         | September 30, 2020 |
| EGFR inhibitors | NCT02164916 | S1406 Phase II Study of Irinotecan and Cetuximab With or Without Vemurafenib in BRAF Mutant Metastatic Colorectal Cancer                                  | Completed | Colorectal Cancer                                                                                                                   | Biological: cetuximab Drug: irinotecan hydrochloride Drug: vemurafenib                                                                                                             | Progression-free Survival Number of Patients With Grade 3 Through 5 Adverse Events That Are Related to Study Drug                                                                                                                                                                                                                                                                                                                                                                                                                                                                                                                                                                                                                               | Phase 2         | 106  | November 2014     | December 30, 2020  |
| EGFR inhibitors | NCT01445405 | Radiation Therapy and Bortezomib and Cetuximab With or Without Cisplatin to Treat Head and Neck Cancer                                                    | Completed | Carcinoma, Squamous Head and Neck Cancer Oral Cancer Laryngeal Cancer Pharyngeal Cancer                                             | Drug: Bortezomib (Velcade, PS-341) Drug: Cetuximab Drug: Cisplatin Procedure: Radiation Therapy                                                                                    | Evaluate feasibility/toxicities of combining proteasome inhibitor bortezomib with cetuximab without/with cisplatin concurrent with radiation for therapy of Pts with advanced SCCHN, and identify MTD for bortezomib for further clinical phase 2 dev...1) Evaluate objective response rate, progression-free survival/overall survival with the above regimen. 2) Determine effects of bortezomib with cetuximab/ cisplatin to inhibi                                                                                                                                                                                                                                                                                                          | Phase 1         | 3    | February 5, 2008  | December 17, 2019  |
| EGFR inhibitors | NCT00317772 | Topotecan and Gefitinib (Iressa) for Ovarian, Peritoneal, or Fallopian Tube Cancer                                                                        | Completed | Ovarian Cancer Peritoneal Neoplasms Fallopian Tube Cancer                                                                           | Drug: Topotecan Drug: Gefitinib                                                                                                                                                    | Dose Limiting Toxicity (DLT) Maximum Tolerated Dose (MTD) of Topotecan Response Rate                                                                                                                                                                                                                                                                                                                                                                                                                                                                                                                                                                                                                                                            | Phase 1 Phase 2 | 19   | September 2, 2004 | November 13, 2020  |
| EGFR inhibitors | NCT00563316 | Effect of Panitumumab on the Pharmacokinetics of Irinotecan                                                                                               | Completed | Metastatic Colorectal Cancer                                                                                                        | Drug: Panitumumab Drug: Irinotecan                                                                                                                                                 | Maximum Observed Plasma Concentration (Cmax) of Irinotecan Area Under the Plasma Concentration-time Curve From the Time of Dosing to Infinity (AUCinf) for Irinotecan Area Under the Plasma Concentration-time Curve From the Time of the Last Quantifiable Concentration (AUClast) for Irinotecan Number of Participants With Clinically Significant                                                                                                                                                                                                                                                                                                                                                                                           | Phase 1         | 28   | March 2008        | April 12, 2016     |



|                 |             |                                                                                                                                                       |           |                                                                                       |                                                                                                     |                                                                                                                                                                                                                                                                                                                                                                                                                                                                                                                                                                                                                                                                                                                                                                                                                                                                                                                                                                                                                                                                                                                                                                                                                                                                                                                                                                                                                                                                                                                                                                                                                                                                                                                                                                                                                                                                            |                 |     |               |                    |
|-----------------|-------------|-------------------------------------------------------------------------------------------------------------------------------------------------------|-----------|---------------------------------------------------------------------------------------|-----------------------------------------------------------------------------------------------------|----------------------------------------------------------------------------------------------------------------------------------------------------------------------------------------------------------------------------------------------------------------------------------------------------------------------------------------------------------------------------------------------------------------------------------------------------------------------------------------------------------------------------------------------------------------------------------------------------------------------------------------------------------------------------------------------------------------------------------------------------------------------------------------------------------------------------------------------------------------------------------------------------------------------------------------------------------------------------------------------------------------------------------------------------------------------------------------------------------------------------------------------------------------------------------------------------------------------------------------------------------------------------------------------------------------------------------------------------------------------------------------------------------------------------------------------------------------------------------------------------------------------------------------------------------------------------------------------------------------------------------------------------------------------------------------------------------------------------------------------------------------------------------------------------------------------------------------------------------------------------|-----------------|-----|---------------|--------------------|
| EGFR inhibitors | NCT00600054 | Phase 2 Study of Nimotuzumab in Pediatric Recurrent Diffuse Intrinsic Pontine Glioma                                                                  | Completed | Recurrent Diffuse Pontine Gliomas                                                     | Biological: nimotuzumab (anti EGFR humanized monoclonal antibody)                                   | To determine the objective response rate To evaluate the safety profile of single agent nimotuzumab in this population                                                                                                                                                                                                                                                                                                                                                                                                                                                                                                                                                                                                                                                                                                                                                                                                                                                                                                                                                                                                                                                                                                                                                                                                                                                                                                                                                                                                                                                                                                                                                                                                                                                                                                                                                     | Phase 2         | 44  | October 2007  | July 6, 2011       |
| EGFR inhibitors | NCT00140556 | Angiogenic and EGFR Blockade With Curative Chemoradiation for Advanced Head and Neck Cancer                                                           | Completed | Head and Neck Cancer Pharynx Cancer                                                   | Radiation: Chemoradiotherapy Drug: Cisplatin Drug: Bevacizumab Drug: Erlotinib                      | Tumor Resolution Local Regional Control Failure Free Survival                                                                                                                                                                                                                                                                                                                                                                                                                                                                                                                                                                                                                                                                                                                                                                                                                                                                                                                                                                                                                                                                                                                                                                                                                                                                                                                                                                                                                                                                                                                                                                                                                                                                                                                                                                                                              | Early Phase 1   | 28  | August 2005   | January 18, 2013   |
| EGFR inhibitors | NCT00446225 | Phase III Study (Tarceva ® ) vs Chemotherapy to Treat Advanced Non-Small Cell Lung Cancer (NSCLC) in Patients With Mutations in the TK Domain of EGFR | Completed | Non-Small Cell Lung Cancer                                                            | Drug: Erlotinib (Tarceva) Drug: Carboplatin // Gemcitabine // Docetaxel //Cisplatin                 | Progression Free-survival Objective Response One year survival Overall survival Safety incidence Life quality Molecular markers related to EGFR and study pathology                                                                                                                                                                                                                                                                                                                                                                                                                                                                                                                                                                                                                                                                                                                                                                                                                                                                                                                                                                                                                                                                                                                                                                                                                                                                                                                                                                                                                                                                                                                                                                                                                                                                                                        | Phase 3         | 174 | February 2007 | March 11, 2013     |
| EGFR inhibitors | NCT01973660 | PAM50 HER2-enriched Phenotype as a Predictor of Response to Dual HER2 Blockade in HER2-positive Early Breast Cancer                                   | Completed | Breast Cancer                                                                         | Drug: Lapatinib Drug: Trastuzumab Drug: Endocrine Therapy Drug: Paclitaxel                          | pCRB to dual HER2 blockade with lapatinib and trastuzumab in all patients, at the time of surgery, predicted by PAM50 HER2-E subtype Pathological complete response in the breast and axilla (pCRBL) to dual HER2 blockade with lapatinib and trastuzumab, in all patients, at the time of surgery, predicted by PAM50 HER2-E subtype Residual cancer burden in the breast (RCB) to dual HER2 blockade with lapatinib and trastuzumab, in all patients, at the time of surgery, predicted by PAM50 HER2-E subtype Changes in the percentage of Ki67-positive cells in PAM50 non-Luminal A/B (combined) subtypes Gene expression variations in all patients, in HR-negative and in HR-positive patients Correlation between PAM50 HER2-E centroid, as a continuous variable, and pCR and/or RCB in the breast to dual HER2 blockade with lapatinib and trastuzumab at the time of surgery Identification of additional gene expression signatures beyond the PAM50 subtypes that predict pCR and/or RCB to dual HER2 blockade with lapatinib and trastuzumab at the time of surgery PAM50 risk of relapse (ROR) score and its ability to predict pCR and/or RCB in the breast to dual HER2 blockade with lapatinib and trastuzumab at the time of surgery in all patients and in those with HR-positive and HR-negative disease PAM50 HER-2 subtype (PAM50 HER2-E signature) ability as a continuous variable to predict pCRB to dual HER2 blockade at the time of surgery in patients with HR-positive disease and in patients with HR-negative disease Changes in gene expression from day 0 to day 14, after dual HER2 blockade, that predict pCRB in all patients and in those with HR-positive and HR-negative disease Frequency of adverse events (AE) when lapatinib plus trastuzumab, with or without endocrine therapy, is administered in the neoadjuvant setting | Phase 2         | 151 | October 2013  | September 19, 2018 |
| EGFR inhibitors | NCT01238237 | Super-Selective Intraarterial Cerebral Infusion of Cetuximab (Erbix) for Treatment of Relapsed/Refractory GBM and AA                                  | Completed | Glioblastoma Multiforme (GBM) ANAPLASTIC ASTROCYTOMA (AOA) GBM Anaplastic Astrocytoma | Drug: Superselective Intraarterial Cerebral Infusion of Cetuximab                                   | The maximum tolerated dose (MTD) of superselective intracerebral intraarterial Cetuximab descriptive frequency of subjects experiencing toxicities . Composite overall response rate Six-month progression-free survival (PFS) and overall survival (OS).                                                                                                                                                                                                                                                                                                                                                                                                                                                                                                                                                                                                                                                                                                                                                                                                                                                                                                                                                                                                                                                                                                                                                                                                                                                                                                                                                                                                                                                                                                                                                                                                                  | Phase 1         | 15  | December 2009 | February 1, 2017   |
| EGFR inhibitors | NCT00994123 | A Study of MM-121 Combination Therapy in Patients With Advanced Non-Small Cell Lung Cancer                                                            | Completed | Carcinoma, Non-Small-Cell Lung                                                        | Drug: MM-121 Drug: Erlotinib                                                                        | Phase 1: To Determine the Recommended Phase 2 Dose of the MM-121 + Erlotinib Combination Based Upon Either the Maximum Tolerated Dose (MTD) or the Maximum Feasible Dose of the Combination in Patients With NSCLC. Phase 1: Determine the Maximum Tolerated Dose Dependent on Reports of Dose-limiting Toxicities Phase 2: Progression-free Survival of the MM-121 + Erlotinib Combination                                                                                                                                                                                                                                                                                                                                                                                                                                                                                                                                                                                                                                                                                                                                                                                                                                                                                                                                                                                                                                                                                                                                                                                                                                                                                                                                                                                                                                                                                | Phase 1 Phase 2 | 162 | February 2010 | August 22, 2016    |
| EGFR inhibitors | NCT00857246 | Pre-operation Chemo and Antibody Therapy Followed by Surgical Resection and Adjuvant Chemoradiation for Gastric Cancer                                | Completed | Gastric Cancer Stomach Cancer                                                         | Drug: Cetuximab Drug: Irinotecan Drug: Cisplatin Procedure: Surgery Drug: 5-FU Radiation: Radiation | Clinical Response Rate of an Induction Regimen Consisting of Irinotecan, Cisplatin and Cetuximab Rate of Clearance of Nodal Involvement Among Patients Who Have Received the Induction Therapy Rate of Potentially Curative Surgery Rate of "Down-staging" From Pre-operative Clinical Staging Safety of the Induction Regimen Median Overall Survival (Induction Treatment and Curative Surgery) Median Overall Survival (Adjuvant Therapy)                                                                                                                                                                                                                                                                                                                                                                                                                                                                                                                                                                                                                                                                                                                                                                                                                                                                                                                                                                                                                                                                                                                                                                                                                                                                                                                                                                                                                               | Phase 2         | 30  | July 2005     | December 7, 2015   |
| EGFR inhibitors | NCT00444678 | Cetuximab Plus Biweekly Capecitabine and Oxaliplatin in KRAS Wild Type Metastatic                                                                     | Completed | Colorectal Cancer Neoplasm Metastasis                                                 | Drug: Cetuximab Drug: Oxaliplatin Drug: Capecitabine                                                | Response Rate for the Combination Treatment Toxicity Rates Time to Progression Survival                                                                                                                                                                                                                                                                                                                                                                                                                                                                                                                                                                                                                                                                                                                                                                                                                                                                                                                                                                                                                                                                                                                                                                                                                                                                                                                                                                                                                                                                                                                                                                                                                                                                                                                                                                                    | Phase 2         | 36  | June 1, 2004  | April 3, 2020      |
| EGFR inhibitors | NCT00392769 | Cetuximab in Patients With Progressive or Recurrent                                                                                                   | Completed | Endometrial Cancer                                                                    | Drug: Cetuximab                                                                                     | Overall Disease Control Rate                                                                                                                                                                                                                                                                                                                                                                                                                                                                                                                                                                                                                                                                                                                                                                                                                                                                                                                                                                                                                                                                                                                                                                                                                                                                                                                                                                                                                                                                                                                                                                                                                                                                                                                                                                                                                                               | Phase 2         | 33  | October 2006  | September 6, 2012  |
| EGFR inhibitors | NCT01737008 | Dacomitinib Plus Radiotherapy, With and Without Cisplatin in Patients With Squamous Cell Carcinoma of the Head and Neck                               | Completed | Squamous Cell Carcinoma of the Head and Neck                                          | Drug: dacomitinib Radiation: Radiotherapy Drug: Cisplatin                                           | Maximum Tolerated Dose (in mg) of Dacomitinib To preliminarily evaluate the response rate of the combination of Dacomitinib, Cisplatin and Radiation Levels of Dacomitinib in the Blood (Pharmacokinetics) in Combination with Cisplatin and Radiation Disease free survival, overall survival and locoregional and distant metastasis free survival                                                                                                                                                                                                                                                                                                                                                                                                                                                                                                                                                                                                                                                                                                                                                                                                                                                                                                                                                                                                                                                                                                                                                                                                                                                                                                                                                                                                                                                                                                                       | Phase 1         | 12  | January 2013  | June 13, 2016      |

|                 |             |                                                                                                                                                 |           |                                                      |                                                              |                                                                                                                                                                                                                                                                                                                                                                                                                                                                                                                                                                                                                                                                                                                                                                                                                                                                                                                                                                                                                                                                                                                                                                                                                                                                                                                                                                                                                                                                                                                                                                                                                                                                                                                                                                                                                                                                                                                                                                                                                                                                                                                                                                                                                                                                                                                                                                                                                                                                                                                                                                                                                                                                                                                                                                                                                                                                                                                                                                                                                                          |                 |                   |             |            |    |
|-----------------|-------------|-------------------------------------------------------------------------------------------------------------------------------------------------|-----------|------------------------------------------------------|--------------------------------------------------------------|------------------------------------------------------------------------------------------------------------------------------------------------------------------------------------------------------------------------------------------------------------------------------------------------------------------------------------------------------------------------------------------------------------------------------------------------------------------------------------------------------------------------------------------------------------------------------------------------------------------------------------------------------------------------------------------------------------------------------------------------------------------------------------------------------------------------------------------------------------------------------------------------------------------------------------------------------------------------------------------------------------------------------------------------------------------------------------------------------------------------------------------------------------------------------------------------------------------------------------------------------------------------------------------------------------------------------------------------------------------------------------------------------------------------------------------------------------------------------------------------------------------------------------------------------------------------------------------------------------------------------------------------------------------------------------------------------------------------------------------------------------------------------------------------------------------------------------------------------------------------------------------------------------------------------------------------------------------------------------------------------------------------------------------------------------------------------------------------------------------------------------------------------------------------------------------------------------------------------------------------------------------------------------------------------------------------------------------------------------------------------------------------------------------------------------------------------------------------------------------------------------------------------------------------------------------------------------------------------------------------------------------------------------------------------------------------------------------------------------------------------------------------------------------------------------------------------------------------------------------------------------------------------------------------------------------------------------------------------------------------------------------------------------------|-----------------|-------------------|-------------|------------|----|
| EGFR inhibitors | NCT00934856 | A Study of Trastuzumab Emtansine (T-DM1) in Combination With Docetaxel, and Potentially Pertuzumab, in Participants With Advanced Breast Cancer | Completed | Breast Cancer                                        | Drug: Docetaxel Drug: Pertuzumab Drug: Trastuzumab emtansine | Number of Participants With Dose Limiting Toxicity (DLT) - MBC and LABC Feasibility Population Percentage of Participants With Adverse Events (AEs) or Serious AEs (SAEs) - MBC and LABC Population Percentage of Participants With Progression-Free Survival (PFS) Event - MBC Population PFS - MBC Population Percentage of Participants With a Best Overall Response (BOR) of Complete Response (CR) or Partial Response (PR) - MBC Population Percentage of Participants With Treatment Failure - MBC Population Time to Treatment Failure (TTF) - MBC Population Percentage of Participants With CR or PR or Stable Disease (SD) for at Least 6 Months [Clinical Benefit Rate (CBR)] - MBC Population Duration of Response - MBC Population Percentage of Participants With Pathological CR (pCR) - LABC Population Percentage of Participants With a BOR of CR or PR - LABC Population Number of Participants With Anti-Therapeutic Antibody (ATA) Response to Trastuzumab - MBC and LABC Population Maximum Observed Concentration (Cmax) of Serum Trastuzumab Emtansine Apparent Terminal Half-Life (t1/2) of Serum Trastuzumab Emtansine Area Under the Concentration-Time Curve From Time 0 to Infinity (AUCinf) of Serum Trastuzumab Emtansine Clearance (CL) of Serum Trastuzumab Emtansine Volume of Distribution at Steady State (Vss) of Serum Trastuzumab Emtansine Cmax of Total Serum Trastuzumab t1/2 of Total Serum Trastuzumab AUCinf of Total Serum Trastuzumab CL of Total Serum Trastuzumab Vss of Total Serum Trastuzumab Cmax of Plasma N2'-Deacetyl-N2'-(3-mercaptopropionyl)-Dose Escalation Phase: Maximum Tolerated Dose (MTD) Dose Escalation Phase: Number of Participants With at Least 1 Dose Limiting Toxicity (DLT) Objective Response Rate (ORR) Percentage of Participants With Treatment Emergent Adverse Events (AEs), Serious Adverse Events(SAEs), AEs Resulting in Discontinuation of MLN0128 and Fatal AEs Within 30 Days of Last Dose of Study Drug Cmax: Maximum Observed Plasma Concentration for MLN0128 Cmin: Minimum Observed Plasma Concentration for MLN0128 Tmax: Time to Reach the Maximum Plasma Concentration (Cmax) for MLN0128 Terminal Phase Elimination Half-life (T1/2) for MLN0128 AUC∞: Area Under the Plasma Concentration-time Curve From Time 0 to Infinity for MLN0128 AUC(0-6): Area Under the Plasma Concentration-time Curve From Time 0 to 6 Hours for MLN0128 Cmax: Maximum Observed Plasma Concentration for Paclitaxel Cmin: Minimum Observed Plasma Concentration for Paclitaxel Tmax: Time to Reach the Maximum Plasma Concentration (Cmax) for Paclitaxel Terminal Phase Elimination Half-life (T1/2) for Paclitaxel AUC∞: Area Under the Plasma Concentration-time Curve From Time 0 to Infinity for Paclitaxel AUC(0-6): Area Under the Plasma Concentration-time Curve From Time 0 to 6 Hours for Paclitaxel AUC(0-24): Area Under the Plasma Concentration-time Curve Extrapolated to 24 Hours for Paclitaxel Cl - Total Clearance Calculated Using the | Phase 1 Phase 2 | 98                | July 2009   | April 2017 | 6, |
| EGFR inhibitors | NCT01351350 | Dose Escalation Study of MLN0128 in Combination With Paclitaxel, With/Without Trastuzumab, in Subjects With Advanced Solid Malignancies         | Completed | Advanced Solid Malignancies Hematologic Malignancies | Drug: MLN0128 Drug: paclitaxel Drug: trastuzumab             | Phase 1                                                                                                                                                                                                                                                                                                                                                                                                                                                                                                                                                                                                                                                                                                                                                                                                                                                                                                                                                                                                                                                                                                                                                                                                                                                                                                                                                                                                                                                                                                                                                                                                                                                                                                                                                                                                                                                                                                                                                                                                                                                                                                                                                                                                                                                                                                                                                                                                                                                                                                                                                                                                                                                                                                                                                                                                                                                                                                                                                                                                                                  | 68              | February 28, 2011 | August 2019 | 8,         |    |
